# Supplementary material
Source: Elsevier journal article supplement (https://www.sciencedirect.com/science/article/pii/S021056912200225X)
Supplement: mmc3 [file S021056912200225X:mmc3.xlsx]

## Sheet: eicu_test
hospital_expire_flag	sex	race	sofa	gcs_min	gcs_motor	gcs_verbal	gcs_eyes	vasonum	Penicillins_cephalosporins	Quinolone	Macrolides	sulfa	vancomycin	metronidazole	Tetracycline	Aminoglycosides	Meropenem	linezolid	other	crrt	los_icu	age	hematocrit_min	hematocrit_max	hemoglobin_min	hemoglobin_max	platelets_min	platelets_max	wbc_min	wbc_max	aniongap_min	aniongap_max	bicarbonate_min	bicarbonate_max	bun_min	bun_max	calcium_min	calcium_max	chloride_min	chloride_max	creatinine_min	creatinine_max	glucose_min	glucose_max	sodium_min	sodium_max	potassium_min	potassium_max	lactate_min
0	0	1	9	3	1	1	1	0	5	0	0	0	0	0	0	0	0	0	0	0	2.875	76	27.5	29.5	8.6	9.2	32	54	19.2	45.9	9	15	18	18	25	28	6.1	7.1	111	113	1	1.1	102	120	134	143	3.4	5.5	1.3
0	0	1	6	13	4	5	4	0	0	0	0	0	4	0	0	0	0	0	0	0	2.375	66	22.4	24.3	7.7	8.3	347	347	7.3	7.3	11	12	23	24	15	19	7.6	7.9	103	109	0.84	0.85	94	139	135	140	3.4	4.2	0.9
1	0	1	4	3	1	1	1	0	0	0	0	0	4	0	0	0	0	0	0	0	3.375	59	37.7	39.8	12	12.7	541	553	35.6	49.8	18	20	14	17	52	72	6.4	6.5	112	115	1.39	3.02	58	99	139	148	4	5	2.6
0	0	1	5	15	6	5	4	0	0	1	0	0	0	0	0	0	0	0	0	0	3.79167	67	37.5	37.5	12.2	12.2	229	229	20.1	20.1	16	18	8	10	18	19	8	7.8	106	106	1.05	1.05	193	187	131	131	4	3.8	3.2
0	1	4	4	15	6	5	4	0	0	0	0	0	3	0	0	0	0	0	0	0	3.20833	53	32.4	32.4	11.5	11.5	53	53	12.2	12.2	7	7	28	28	12	12	7	7	101	101	1.13	1.13	267	267	132	132	4	4	1.8
0	1	4	8	15	6	5	4	0	0	0	0	0	7	0	0	0	0	0	0	0	3.79167	52	31	33.7	11.2	12.3	30	35	4.2	5.6	10	12	23	23	11	12	7.4	7.9	98	102	1.23	1.36	134	362	128	134	2.9	3.4	2.2
0	0	4	6	9	4	1	4	0	4	0	0	0	0	0	0	0	0	0	0	0	1.79167	40	31.9	31.9	11.2	11.2	280	280	17.6	17.6	11.2	14	17	22	18	23	7.9	8.1	100	101	1.2	1.52	133	149	132	134	2.8	3.8	3
0	1	2	7	15	6	5	4	0	0	0	0	0	4	0	0	0	0	0	0	1	2.79167	44	39.4	39.4	12.5	12.5	113	113	3.8	3.8	24	24	17	17	51	51	7.7	7.7	99	99	10.52	10.52	112	112	134	134	5.7	5.7	1.3
0	1	1	6	6	1	2	3	0	0	0	0	0	4	0	0	0	0	0	0	0	82.7917	65	30.5	30.5	9.8	9.8	139	139	4	4	14	14	27	27	32	32	8.7	8.7	99	99	4.87	4.87	112	112	136	136	4.2	4.4	1.8
0	1	1	7	15	6	5	4	0	0	0	0	0	6	0	0	0	0	0	0	1	1.54167	65	32.2	32.2	10.3	10.3	136	136	5.4	5.4	12	12	30	30	41	41	8.3	8.3	99	99	4.31	4.31	103	103	137	137	3.9	3.9	0.8
0	0	1	2	13	4	5	4	0	0	0	2	0	0	0	0	0	0	0	0	0	1.75	91	28.2	28.2	9.4	9.4	323	323	11.3	11.3	11	11	24	24	20	20	8.2	8.2	105	105	0.94	0.94	112	112	136	136	3.7	3.7	1.1
0	1	2	6	13	6	3	4	0	0	0	0	0	5	0	0	0	0	0	0	0	1.95833	70	35.8	40	11.9	11.9	101	101	19.2	19.2	12	12	25	25	13	13	7.6	7.6	105	105	0.97	0.97	150	150	138	138	4.1	4.6	1.4
0	1	2	3	14	6	5	3	0	0	0	0	0	4	0	0	0	0	0	0	0	1.70833	70	36	36	11.4	11.4	101	101	10.5	10.5	9	9	27	27	12	12	8.1	8.1	109	109	0.92	0.92	135	135	141	141	4	4	1.4
0	1	2	3	15	6	5	4	0	0	2	0	0	0	0	0	0	0	0	0	0	1	71	36.3	36.3	11.9	11.9	96	96	15	15	7	7	31	31	7	7	8.1	8.1	107	107	0.89	0.89	135	135	141	141	4.1	4.1	1.9
0	1	2	3	10	6	1	3	0	0	0	0	0	1	0	0	0	0	0	0	0	1.41667	71	37.4	37.4	12.3	12.3	82	82	9.9	9.9	6	6	28	28	13	13	7.9	7.9	109	109	0.99	0.99	146	146	139	139	4.3	4.3	0.6
0	1	2	5	14	6	5	3	0	0	4	0	0	0	0	0	0	0	0	0	0	1.58333	70	33.8	33.8	10.7	10.7	86	86	13.3	13.3	10	10	25	25	11	11	7.6	7.6	113	113	1.19	1.19	139	139	144	144	4.2	4.2	0.9
0	1	1	7	15	6	5	4	0	0	0	0	0	0	0	0	0	3	0	0	0	1.83333	86	27.2	27.2	8.2	8.2	106	106	10.7	10.7	9	9	31	31	40	40	8.2	8.2	102	102	1.7	1.7	147	147	138	138	3.9	3.9	1.1
0	1	3	10	3	1	1	1	0	0	0	0	0	4	0	0	0	0	0	0	1	4.875	58	28.3	28.3	8.9	8.9	247	247	28.2	28.2	17	17	25	25	56	56	8.3	8.3	100	100	6.15	6.15	44	44	136	136	5.5	6.2	1.1
0	1	3	8	10	5	4	1	0	0	0	0	0	5	0	0	0	0	0	0	1	1.45833	57	27	27	9.2	9.2	145	145	3.6	3.6	18	18	26	27	70	73	7.7	8.2	96	97	7.11	7.79	69	183	136	136	4.5	6.2	0.9
0	1	2	7	7	4	1	2	0	0	0	3	0	0	0	0	0	0	0	0	0	2.70833	91	34.7	34.7	10.3	10.3	321	321	18.6	18.6	14	14	25	25	61	61	9.2	9.2	126	126	0.9	0.9	130	130	156	169	3.8	3.8	2.1
0	0	1	13	3	1	1	1	0	0	0	0	0	0	0	0	0	0	0	0	0	4.125	51	19.3	19.3	6.9	6.9	54	54	3.5	3.5	19	40	6	23	6	8	5.6	6.3	94	101	0.87	1.09	315	444	137	141	1.5	3.2	5.2
0	1	1	5	9	4	4	1	0	2	0	0	0	0	0	0	0	0	0	0	0	1.375	60	35.5	35.5	11.3	11.3	249	249	19	19	13	13	22	22	12	12	7.6	7.6	111	111	1.02	1.02	127	127	142	142	3.4	3.7	1.4
0	1	1	4	14	5	5	4	0	0	0	0	0	5	0	0	0	0	0	0	0	1.95833	57	35	35.1	11.1	11.5	251	251	7.1	7.1	13	14	30	31	25	25	8.6	8.8	100	102	1.58	1.66	214	270	140	142	4.1	4.3	1.5
0	1	1	4	14	6	4	4	0	0	0	0	0	8	0	0	0	0	0	0	0	1.54167	57	37.7	37.7	12.4	12.4	213	213	9.5	9.5	14	14	29	29	21	21	8.2	8.2	100	100	1.57	1.57	135	135	138	138	4	4.6	2.1
0	1	1	8	14	6	4	4	0	0	0	0	0	3	0	0	0	0	0	0	0	3.41667	91	31.6	32.5	10.8	11.1	102	106	12.2	14.1	14	18	20	21	21	21	7.2	7.4	111	112	1.55	1.99	190	263	143	145	3.5	3.8	5.2
0	1	1	8	7	1	5	1	0	2	0	0	0	0	0	0	0	0	0	0	0	3.625	57	33	33	10.6	10.6	226	226	22.2	22.2	23	23	14	14	8	8	6.9	6.9	104	104	0.45	0.45	158	158	138	138	2.9	4.2	1.3
0	1	1	11	10	4	3	3	0	0	0	0	0	0	3	0	0	0	0	0	0	12.0417	77	40.9	40.9	13.4	13.4	245	245	33.3	33.3	6	6	28	28	31	31	7.9	7.9	106	106	1.05	1.05	170	170	136	136	4.2	4.2	1.5
0	0	1	2	15	6	5	4	0	0	0	0	0	5	0	0	0	0	0	0	0	1.625	60	21.4	21.4	6.8	6.8	94	94	8	8	10	10	27	27	7	7	7.9	7.9	101	101	0.58	0.58	102	102	135	135	3.2	3.2	1.5
0	0	1	6	12	3	5	4	0	0	0	0	0	2	0	0	0	0	0	0	0	1.875	74	31.5	32.2	10.1	10.3	316	321	19.2	20	20	21	16	18	94	97	6.7	7.4	108	109	7.5	7.8	74	101	139	142	6.1	6.6	0.7
0	1	1	8	10	2	4	4	0	2	0	0	0	0	0	0	0	0	0	0	0	4.58333	80	25.8	25.8	8	8	299	299	10.5	10.5	13	13	32	32	34	34	9	9	99	99	1.63	1.63	158	158	140	140	3.1	4.1	1
0	1	1	6	10	6	2	2	0	0	0	0	0	7	0	0	0	0	0	0	0	3.45833	27	35.2	35.2	11.9	11.9	162	162	18.4	18.4	15	16	21	22	20	24	7.1	7.5	107	109	1.41	2.07	173	189	141	141	4.1	4.4	0.8
1	1	1	4	8	3	1	4	0	0	5	0	0	0	0	0	0	0	0	0	0	1.20833	65	26.3	26.3	8.5	8.5	344	344	31.4	31.4	15	15	24	24	42	42	8	8	101	101	1.5	1.5	135	135	136	136	3.7	3.7	2.2
0	1	1	3	15	6	5	4	0	3	0	0	0	0	0	0	0	0	0	0	0	1.83333	67	32	32	10.2	10.2	233	233	7.3	7.3	18	18	16	16	91	91	7.1	7.1	116	116	4.38	4.38	169	169	146	146	4	4	1.2
0	1	1	4	15	6	5	4	0	0	0	0	0	4	0	0	0	0	0	0	0	1.70833	72	34.2	34.2	11	11	204	204	11	11	7	7	27	27	8	8	9.3	9.3	106	106	0.78	0.78	86	86	136	136	3.7	3.7	1.3
0	1	1	5	6	3	1	2	0	4	0	0	0	0	0	0	0	0	0	0	0	3.5	72	27.9	27.9	9	9	148	148	11.8	11.8	12	12	20	20	12	12	7.6	7.6	112	112	0.93	0.93	118	118	141	141	2.7	3.6	0.7
0	1	1	2	14	6	5	3	0	4	0	0	0	0	0	0	0	0	0	0	0	1.75	71	25.9	25.9	8	8	235	235	15.8	15.8	13	13	24	24	34	34	7.6	7.6	104	104	1.25	1.25	374	374	136	136	4.5	4.5	1.8
0	1	1	7	6	1	1	4	0	4	0	0	0	0	0	0	0	0	0	0	0	3.58333	60	45	45	14	14	237	237	8.8	8.8	7	7	35	35	18	18	8	8	104	104	0.84	0.84	157	157	141	141	5.3	5.3	1.3
0	0	2	4	14	6	5	3	0	0	0	0	0	2	0	0	0	0	0	0	0	2.75	54	26.6	26.6	8.1	8.1	882	882	21.8	21.8	18	18	18	18	20	20	7	7	109	109	1.5	1.5	124	124	140	140	5.1	5.1	2.1
0	1	1	8	11	5	5	1	0	0	0	0	0	3	0	0	0	0	0	0	0	2.08333	31	26	37.3	7.9	11.5	371	595	9.2	16.7	16	16	28	28	11	11	9	9	99	99	0.52	0.52	142	142	139	139	3.9	3.9	0.9
0	1	1	10	14	6	5	3	0	0	0	0	0	0	0	0	0	0	0	0	0	14.4583	30	38.7	38.7	12.6	12.6	243	243	7.5	7.5	16	16	25	25	24	24	8.5	8.5	104	104	0.39	0.39	105	105	141	141	3.5	3.5	3.1
0	1	1	10	12	3	5	4	0	2	0	0	0	0	0	0	0	0	0	0	0	1.125	31	27	27	8.2	8.2	249	249	5.2	5.2	13	13	26	26	16	16	9	9	104	104	0.52	0.52	93	93	140	140	3.2	3.2	3.1
0	0	1	4	13	6	4	3	0	3	0	0	0	0	0	0	0	0	0	0	0	2.83333	61	36	36	11.4	11.4	309	309	20.9	20.9	11	11	31	31	11	11	8.1	8.1	102	102	0.86	0.86	106	106	141	141	3	4	0.8
0	0	2	8	3	1	1	1	0	0	0	0	0	4	0	0	0	0	0	0	0	7.16667	61	26.7	27.1	8.1	8.4	196	196	10.1	10.1	3	3	36	36	11	11	7.4	7.4	103	103	0.9	0.9	122	122	139	139	3.3	3.5	0.8
0	0	1	7	10	4	2	4	0	0	0	0	0	3	0	0	0	0	0	0	0	4.70833	62	24.9	29.6	8.5	9.9	286	377	12.4	15.2	12	20	19	20	18	18	8.2	9.1	101	110	0.74	0.75	141	200	136	139	3.1	3.5	2
1	0	2	5	8	1	4	3	0	0	0	0	0	3	0	0	0	0	0	0	0	4.45833	58	16.5	16.5	5.7	5.7	23	23	7.2	7.2	15	15	12	12	10	10	6.9	6.9	116	116	1.39	1.39	83	83	140	140	2.8	2.8	2
0	1	4	14	11	6	1	4	0	0	0	0	0	6	0	0	0	0	0	0	1	8.20833	72	27.4	27.4	8.2	8.2	155	155	31.3	31.3	19	19	24	24	39	39	8.4	8.4	95	95	2.88	2.88	158	158	134	134	3.9	3.9	2.5
0	1	1	6	8	6	1	1	0	2	0	0	0	0	0	0	0	0	0	0	0	5.54167	64	29.4	31.4	9.8	10.5	95	100	7.9	8	9.8	11	23	24	31	40	8.3	8.3	108	107	0.82	1.1	236	142	139	138	4.1	4.5	1.3
0	1	1	2	15	6	5	4	0	0	0	4	0	0	0	0	0	0	0	0	0	2.66667	66	27.3	27.3	8.5	8.5	129	129	3.7	3.7	11	11	30	30	33	33	8.7	8.7	103	103	1.54	1.54	108	108	139	139	4.5	4.5	0.4
0	1	1	7	11	4	3	4	0	0	0	0	0	6	0	0	0	0	0	0	0	4.5	39	30.5	33.9	10.1	11.9	164	170	11.8	14.1	15	17	22	24	11	16	7.4	7.6	104	106	0.96	1.17	103	133	139	141	4.3	4.8	0.6
0	0	1	5	14	6	5	3	0	0	4	0	0	0	0	0	0	0	0	0	0	13.7083	55	31.6	31.6	10.3	10.3	184	184	12.5	12.5	10	10	32	32	11	11	7.8	7.8	101	101	0.75	0.75	132	132	138	138	4.9	4.9	1.8
0	0	1	2	14	6	4	4	0	0	0	0	0	0	0	0	0	1	0	0	0	1.75	49	23.3	23.3	7.4	7.4	191	191	21.2	21.2	14	14	20	20	34	34	7.4	7.4	109	109	1.34	1.34	95	95	138	138	4.5	4.5	1.1
0	0	1	7	12	6	2	4	0	0	0	0	0	0	0	0	0	0	0	0	0	1.08333	67	26.3	26.3	8.6	8.6	198	198	14.1	14.1	13	15	25	25	51	52	8.1	8.3	97	98	3.9	4.5	175	220	131	132	4.7	4.9	1.2
1	1	1	8	7	4	1	2	0	0	0	0	0	8	0	0	0	0	0	0	0	7.08333	79	29	29	9.8	9.8	205	205	18.4	18.4	13	13	28	28	52	52	8.1	8.1	101	101	2.5	2.5	128	128	138	138	3.9	3.9	1.1
0	1	1	2	14	6	5	3	0	0	0	0	0	7	0	0	0	0	0	0	0	1	69	35.6	35.6	11.9	11.9	86	95	5.2	5.2	14	14	26	26	7	7	7.8	7.8	104	104	0.95	0.95	110	110	140	140	3.7	3.7	1
0	1	2	6	15	6	5	4	0	0	0	0	0	9	0	0	0	0	0	0	1	4.79167	40	30	30.1	9.8	9.8	177	199	6.6	7.4	17	20	19	21	61	62	9.1	9.6	99	99	3.4	3.61	154	172	133	134	4	4.4	0.6
0	1	3	7	14	6	5	3	0	2	0	0	0	0	0	0	0	0	0	0	1	2.83333	44	34	34	11.5	11.5	189	189	34.5	34.5	31	32	8	8	135	139	7.5	8.1	90	94	13.54	14.4	145	208	125	129	4.3	4.7	1.8
0	0	1	9	3	1	1	1	0	0	0	0	0	2	0	0	0	0	0	0	0	17	53	28.3	30.2	9.6	10.5	243	275	21.6	26.3	13	14	19	21	24	26	7.3	7.4	112	114	0.95	1.12	154	169	142	144	3.2	4.3	2
0	0	1	9	3	1	1	1	0	0	4	0	0	0	0	0	0	0	0	0	0	3.625	76	33.9	33.9	10.2	10.2	329	329	20.9	20.9	4	4	36	36	23	23	8.9	8.9	112	112	0.72	0.72	182	182	148	148	3.4	4.4	1
0	0	1	7	14	6	5	3	0	0	0	0	0	2	0	0	0	0	0	0	0	6.625	86	29.1	29.1	9.3	9.3	555	541	22.6	19.72	12	12.6	24	24	14	14	8.8	8.9	106	107	1	0.83	128	107	144	144	4.1	3.9	1.1
0	0	1	8	10	6	1	3	0	0	0	0	0	5	0	0	0	0	0	0	0	1.91667	83	31	31	9.8	9.8	42	42	6.7	6.7	10	10	29	29	37	37	8.7	8.7	111	111	0.9	0.9	74	74	145	145	4.9	4.9	2.1
0	1	1	6	15	6	5	4	0	0	0	0	0	5	0	0	0	0	0	0	0	2.70833	91	31.3	35.8	10.5	12.2	100	114	11.5	12.6	11	18	19	23	30	35	8.9	9	103	105	1.81	1.86	139	195	135	135	3.7	4.5	2
0	1	1	2	15	6	5	4	0	0	0	3	0	0	0	0	0	0	0	0	0	10.5417	66	44.2	44.2	14.4	14.4	140	140	9.7	9.7	16	16	25	25	17	17	8.8	8.8	102	102	1.27	1.27	303	303	138	138	4.7	4.7	1.7
0	1	1	3	15	6	5	4	0	0	3	0	0	0	0	0	0	0	0	0	0	1.95833	88	23.9	24	7.7	7.7	108	108	20	20	11	11	24	24	43	43	7.7	7.7	105	105	1.27	1.27	113	113	136	136	3.9	4.1	1.5
1	0	3	11	3	1	1	1	0	0	0	0	0	5	0	0	0	0	0	0	0	2.625	73	32.5	32.5	10.5	10.5	124	124	25.6	25.6	26	29	9	12	5	7	7.8	8.1	106	106	2.9	3.2	111	150	140	141	3.3	3.6	14.7
1	0	1	3	13	4	5	4	0	0	1	0	0	0	0	0	0	0	0	0	0	2.25	91	37.9	37.9	12.5	12.5	213	213	14.1	14.1	14	14	27	27	45	45	8.6	8.6	100	100	2.02	2.02	126	126	137	137	4.3	4.3	2.7
0	1	1	3	15	6	5	4	0	0	0	0	0	4	0	0	0	0	0	0	0	2.29167	85	22.2	22.9	7.3	7.3	112	131	8.2	11.7	8	11	27	30	29	31	8	8.2	105	108	1.09	1.35	132	231	139	142	4.1	4.3	0.6
0	1	1	4	7	2	1	4	0	0	0	0	0	8	0	0	0	0	0	0	0	9.58333	77	24.9	30.9	7.6	9.4	150	202	27.1	27.2	4	5	32	37	20	22	7.6	8.7	107	111	0.77	0.9	51	95	144	144	4	4.4	1.8
0	1	1	11	15	6	5	4	0	0	0	0	0	5	0	0	0	0	0	0	0	1.70833	43	34.9	34.9	9.3	9.3	158	158	13.7	13.7	11	11	29	29	24	24	7.9	7.9	103	103	2.01	2.01	159	159	139	139	4.2	4.2	1.6
0	1	1	7	14	6	5	3	0	0	0	0	0	0	0	0	0	0	0	0	0	1.04167	44	41	41	11	11	150	150	10.2	10.2	13	13	26	26	23	23	7.8	7.8	104	104	2.52	2.52	117	117	138	138	4.9	4.9	1.4
0	1	1	9	3	1	1	1	0	0	2	0	0	0	0	0	0	0	0	0	0	2.125	80	34.5	37.8	10.7	12.1	249	270	17.5	24.2	11	13	31	33	41	47	8.5	8.7	102	104	1.17	1.41	210	230	142	144	4.3	4.4	1.3
1	0	1	7	11	3	4	4	0	0	0	0	0	2	0	0	0	0	0	0	0	2.95833	83	36.6	36.6	11.3	11.3	191	191	19.6	19.6	11	11	27	27	58	58	8.2	8.2	107	107	1.4	1.4	129	129	141	141	4.1	4.1	1.87
0	0	1	14	7	2	2	3	0	0	4	0	0	0	0	0	0	0	0	0	0	17.5833	84	35.7	35.7	10.2	10.2	132	132	6.9	6.9	5	5	37	37	30	30	8.3	8.3	110	110	1.31	1.31	118	118	147	147	4.8	4.8	0.38
0	1	3	8	13	4	5	4	0	0	0	0	0	4	0	0	0	0	0	0	0	47.8333	43	41.7	41.7	14.1	14.1	236	236	12.2	12.2	15	15	24	24	17	17	7.8	7.8	101	101	1.75	1.75	117	117	136	136	3.6	3.6	1.4
0	0	1	12	10	4	2	4	0	0	0	1	0	0	0	0	0	0	0	0	0	2.29167	91	34	34	11.9	11.9	140	140	6.3	6.3	14	14	26	26	23	23	8.5	8.5	103	103	0.97	0.97	145	145	139	139	3.9	3.9	0.9
0	0	1	8	15	6	5	4	0	3	0	0	0	0	0	0	0	0	0	0	0	2.33333	91	36.5	37.8	12.4	12.9	85	78	13.2	13.8	10	10	27	27	25	25	8.1	8.1	107	107	1.26	1.26	137	137	140	140	4	4	1.4
0	0	3	7	11	6	2	3	0	0	0	0	0	3	0	0	0	0	0	0	0	3.5	50	35.6	35.6	11.1	11.1	72	72	10.9	10.9	14	21.9	13	16	30	32	8.1	8.4	103	106	0.82	0.82	78	130	133	136	3.4	3.7	1.8
0	0	1	4	15	6	5	4	0	0	0	0	0	11	0	0	0	0	0	0	0	3.66667	65	27	27	8.6	8.6	444	444	12.7	12.7	14	14	25	25	8	8	8.4	8.4	107	107	0.71	0.71	103	103	143	143	3.2	3.6	1.5
0	0	1	7	14	6	5	3	0	0	0	0	0	7	0	0	0	0	0	0	0	4.04167	65	26.7	30.6	8.5	10	405	446	14.2	19.6	15	15	21	21	40	40	8.6	8.6	105	105	2.55	2.55	158	158	138	138	3.3	3.5	2.2
0	1	1	4	4	2	1	1	0	0	3	0	0	0	0	0	0	0	0	0	0	1.125	82	26.2	26.2	8.2	8.2	198	198	42.7	42.7	20	20	16	17	30	32	8.3	8.6	101	101	1.6	1.9	128	145	133	134	3.9	4.2	1.4
0	0	1	7	10	2	5	3	0	4	0	0	0	0	0	0	0	0	0	0	0	2.79167	26	22.6	22.6	7.2	7.2	280	280	9.1	9.1	17	18	20	22	30	75	7.8	8.1	100	101	3.6	6.8	146	315	132	137	3.8	5.1	0.6
0	1	3	4	15	6	5	4	0	0	0	0	0	3	0	0	0	0	0	0	0	1.45833	45	29.1	29.1	9.7	9.7	229	229	19.9	19.9	17	17	18	18	36	36	8.3	8.3	99	99	3.19	3.19	124	124	130	130	4.3	4.3	1
0	0	2	8	6	1	1	4	0	5	0	0	0	0	0	0	0	0	0	0	0	7.58333	57	35.5	35.5	11.3	11.3	204	204	5	5	19	19	23	23	33	33	7.3	7.3	105	105	1.96	1.96	98	98	142	142	4.8	4.8	2.5
0	1	1	11	9	3	3	3	0	0	0	0	0	3	0	0	0	0	0	0	0	1.83333	71	26	28.7	8.7	9.6	290	333	11.5	13.6	13	13	22	23	33	34	7.6	7.8	107	110	1.21	1.48	108	122	138	140	4.7	4.7	1.5
0	1	1	4	13	6	4	3	0	0	1	0	0	0	0	0	0	0	0	0	0	2.75	58	41.3	41.3	13.5	13.5	120	120	7.1	7.1	12	12	31	31	30	30	8.7	8.7	101	101	1	1	166	166	140	140	4.1	4.1	1
0	1	1	8	15	6	5	4	0	0	0	0	0	5	0	0	0	0	0	0	0	1.79167	89	24.6	24.6	8.9	8.9	147	147	1.9	1.9	16	16	24	24	21	21	6.8	6.8	101	101	1.07	1.07	145	145	138	138	3	3.1	1.1
0	0	1	7	15	6	5	4	0	0	0	2	0	0	0	0	0	0	0	0	0	2.08333	81	34.4	34.4	11.3	11.3	190	190	22.4	22.4	14	14	24	24	34	34	8	8	104	104	1.43	1.43	136	136	138	138	3.6	3.6	0.5
0	0	1	8	15	6	5	4	0	0	0	0	0	6	0	0	0	0	0	0	0	3.66667	77	35.6	35.6	10.5	10.5	179	179	12.1	12.1	17	17	19	19	74	74	7.7	7.7	117	117	3.27	3.27	125	125	148	148	4.9	4.9	1.3
0	0	1	9	12	6	2	4	0	1	0	0	0	0	0	0	0	0	0	0	0	3.54167	91	33.4	30.7	10.2	9.4	66	50	14.6	11.7	16	16	24	24	28	28	7.5	7.5	106	106	1.8	1.8	104	104	142	142	4.1	4.1	2.2
0	0	1	13	3	1	1	1	0	2	0	0	0	0	0	0	0	0	0	0	0	8.29167	71	32.4	32.9	10.8	11	98	98	7	7	13	15	24	25	17	19	9	9.2	108	109	1.07	1.22	88	91	143	143	3.7	3.7	1
0	1	2	3	15	6	5	4	0	0	0	0	0	5	0	0	0	0	0	0	0	1.45833	71	37.3	40.8	12.2	13.4	334	440	21.9	28.4	12	12	27	27	37	37	9	9	102	102	1.85	1.85	160	160	137	137	3.9	3.9	0.9
0	0	1	11	5	1	1	3	0	0	0	0	0	5	0	0	0	0	0	0	1	4.625	81	24.7	24.7	7.6	7.6	264	264	35.6	35.6	12	12	26	26	54	54	7.4	7.4	105	105	1.43	1.43	106	106	139	139	4.3	4.3	1
0	0	1	9	3	1	1	1	0	0	0	0	0	2	0	0	0	0	0	0	1	21.0417	81	23.3	25	7.5	7.7	369	369	22.1	22.1	14	14	27	27	26	26	9.1	9.1	99	99	1.52	1.52	140	140	136	136	3.6	3.6	1.4
0	0	3	2	14	6	5	3	0	0	0	0	0	7	0	0	0	0	0	0	1	1.875	72	32	32	9.9	9.9	214	214	23.2	23.2	14	14	24	24	12	12	7.8	7.8	109	109	1	1	188	188	144	144	3.3	4	1.7
0	0	1	5	14	6	4	4	0	2	0	0	0	0	0	0	0	0	0	0	0	2.95833	77	34.1	34.1	11.1	11.1	163	163	5	5	13	14	24	25	18	20	8	8.1	108	111	0.89	0.97	84	122	141	146	3.9	4	0.5
0	0	1	11	10	1	5	4	0	0	0	0	0	4	0	0	0	0	0	0	0	4.45833	91	28.1	28.1	9.3	9.3	208	208	5.5	5.5	15	15	20	20	20	20	7.4	7.4	106	106	1.09	1.09	107	107	138	138	3.1	3.1	0.7
1	1	1	6	13	4	5	4	0	0	0	0	0	0	0	0	0	0	0	0	0	4.29167	84	32.4	33.2	10.3	10.8	324	385	22.4	28.9	10	11	32	32	58	61	8.2	8.5	96	99	1.72	1.91	206	233	134	138	3.5	4.2	2
0	1	1	5	14	6	5	3	0	0	0	0	0	5	0	0	0	0	0	0	0	1.66667	72	27.1	28.8	8.3	9.1	177	178	8.1	9.8	11	11	28	28	11	11	7.8	7.8	104	104	0.57	0.57	126	126	139	139	3.6	4.7	0.5
0	0	1	7	8	1	3	4	0	0	0	0	0	4	0	0	0	0	0	0	0	5	83	47.1	47.1	14.5	14.5	214	214	10.1	10.1	10	13	27	29	35	37	7.8	8.5	115	116	0.93	1.22	105	160	152	152	3.1	3.3	1.5
0	1	2	3	10	6	1	3	0	0	0	0	0	6	0	0	0	0	0	0	0	3.625	75	33	31.9	10.1	9.9	99	92	14.7	14.2	8	7	26	26	18	30	6	6.9	118	136	0.26	0.44	93	117	148	161	3.5	4	0.6
0	0	1	6	3	1	1	1	0	0	0	0	0	3	0	0	0	0	0	0	0	4.75	91	37.5	37.5	13	13	165	165	22	22	12	12	26	26	33	33	9.3	9.3	104	104	1.53	1.53	165	165	138	138	2.6	3.7	1.9
0	1	1	16	3	1	1	1	0	0	0	0	0	3	0	0	0	0	0	0	0	5.5	54	27.5	33.9	8.9	10.4	129	200	4	7.1	19	41	8	26	30	31	6.3	7.4	89	92	3.43	3.52	139	247	131	135	4	5	6.2
0	1	1	9	3	1	1	1	0	0	0	0	0	2	0	0	0	0	0	0	0	3.41667	69	32	32	9.4	9.4	567	567	21.6	21.6	22	45	8	23	41	91	7.5	8.9	95	100	5.9	11.9	136	618	141	145	3.5	6.5	1.4
0	1	1	9	13	4	5	4	0	0	0	0	0	0	0	0	0	3	0	0	0	1.16667	64	18.1	20.2	5.4	6.2	307	326	12.6	15.6	14	15.7	12	13	39	63	7.3	7.5	110	114	1.32	1.17	163	198	135	139	4.9	4.9	1.6
0	1	1	12	9	3	5	1	0	0	0	0	0	4	0	0	0	0	0	0	0	3.66667	67	32	35	10.6	10.6	137	137	12.1	12.1	13	13	26	26	18	18	7.9	7.9	107	107	0.89	0.89	88	88	142	142	3.8	3.9	1.9
0	0	1	4	15	6	5	4	0	0	0	0	0	7	0	0	0	0	0	0	0	2.29167	74	30.9	30.9	10	10	228	228	14.2	14.2	9	9	33	33	9	9	9.1	9.1	102	102	0.94	0.94	151	151	140	140	3.9	3.9	1.2
0	1	1	2	14	6	5	3	0	0	0	0	0	0	0	0	0	0	0	0	0	1.5	75	37.7	37.7	12.3	12.3	162	162	14.5	14.5	14	14	26	26	22	22	8.4	8.4	103	103	1.41	1.41	122	122	138	138	4.9	4.9	0.9
1	1	1	15	3	1	1	1	0	0	0	0	0	8	0	0	0	0	0	0	0	12.2083	69	25.1	31	8.4	9.9	13	24	0.1	0.1	16	18	18	21	64	67	6.2	6.9	103	107	4.86	5.32	100	213	135	138	4.2	5	1.9
0	1	1	10	13	6	3	4	0	0	0	0	0	5	0	0	0	0	0	0	0	4.58333	67	33.3	33.3	11.1	11.1	148	148	13.2	13.2	9	9	25	25	11	11	8.7	8.7	111	111	0.94	0.94	112	112	142	142	2.9	2.9	1.8
0	0	1	7	4	1	1	2	0	4	0	0	0	0	0	0	0	0	0	0	0	6.45833	84	28.9	28.9	8.4	8.4	109	109	15	15	13	19	23	26	12	16	7.8	8.4	126	129	2.21	2.36	136	147	160	168	3.4	4.3	0.9
0	0	3	2	15	6	5	4	0	0	0	0	0	1	0	0	0	0	0	0	1	4.875	41	22.9	22.9	7.3	7.3	275	275	18.5	18.5	14	31	9	18	4	10	7	9.4	103	108	1.1	1.84	128	652	127	141	3.1	5.9	2.4
0	0	3	7	6	1	1	4	0	0	0	0	0	2	0	0	0	0	0	0	1	4	41	19.3	19.3	6	6	297	297	12.8	12.8	13	21	13	19	11	13	7.3	7.5	107	113	2.09	2.23	86	331	137	142	3.4	4.3	3.5
0	0	1	2	15	6	5	4	0	0	0	0	0	1	0	0	0	0	0	0	0	1.25	70	33.3	33.3	11	11	121	121	4.9	4.9	15	15	28	28	4	4	7.5	7.5	100	100	0.6	0.6	124	124	140	140	3	3	2.1
0	1	1	7	10	4	5	1	0	4	0	0	0	0	0	0	0	0	0	0	0	1.41667	42	38.2	38.2	13	13	132	132	13.4	13.4	16	16	22	22	15	15	6.8	6.8	109	109	1.7	1.7	98	98	143	143	3.5	3.5	1.4
1	1	1	12	15	6	5	4	0	0	0	0	0	2	0	0	0	0	0	0	0	4.66667	49	26	26	8.5	8.5	144	144	10.3	10.3	13	13	23	23	15	15	8.2	8.2	113	113	1.5	1.5	109	109	145	145	3.5	4.1	3
0	0	1	2	15	6	5	4	0	0	0	0	0	4	0	0	0	0	0	0	0	1.70833	84	34.4	34.4	11.1	11.1	209	209	11.5	11.5	12	12	24	24	15	15	8.2	8.2	109	109	0.93	0.93	123	123	141	141	3.3	4.2	1.4
0	0	1	6	15	6	5	4	0	0	0	3	0	0	0	0	0	0	0	0	0	3.58333	70	42.5	42.5	14.4	14.4	234	234	16.4	16.4	18	18	21	21	53	57	8.5	8.7	93	96	2.2	2.5	89	131	127	130	4.8	4.9	0.97
0	1	2	7	14	6	4	4	0	6	0	0	0	0	0	0	0	0	0	0	0	1.20833	61	31.2	31.2	10.1	10.1	129	129	17.2	17.2	12	16	27	27	52	53	8.7	8.7	101	104	3.14	3.45	194	212	139	140	3.5	3.5	1.4
0	1	1	4	15	6	5	4	0	0	0	0	0	2	0	0	0	0	0	0	0	1	61	34.1	34.1	10.8	10.8	130	130	6.3	6.3	10	10	33	33	18	18	8.8	8.8	106	106	1.04	1.04	84	84	145	145	3.6	3.6	1.9
0	1	1	3	13	4	5	4	0	0	0	0	0	6	0	0	0	0	0	0	0	6.625	53	28.3	26.3	8.9	8.4	96	49	8.9	5.4	14	14	22	22	34	34	8.5	8.5	104	104	2.3	2.3	122	122	137	137	3.1	3.8	1.1
0	1	1	7	9	6	2	1	0	0	0	0	0	3	0	0	0	0	0	0	0	10.7083	78	26.6	26.6	8.6	8.6	202	202	14.4	14.4	16	16	18	18	57	57	7.9	7.9	109	109	1.37	1.37	151	151	139	139	3.8	4.4	1.9
0	0	4	6	11	2	5	4	0	0	3	0	0	0	0	0	0	0	0	0	0	7.79167	19	28.3	28.3	9.6	9.6	292	292	13	13	6	4	24	22	16	17	6.9	7.2	104	104	0.7	0.7	120	138	132	132	3.6	4.2	0.8
0	1	1	7	6	1	1	4	0	0	0	0	0	3	0	0	0	0	0	0	0	5	73	26.3	26.3	8.3	8.3	283	283	14	14	12	12	31	31	64	64	7.9	7.9	98	98	2.77	2.77	89	89	137	137	4.1	5.1	1.3
0	1	1	3	15	6	5	4	0	0	0	0	0	4	0	0	0	0	0	0	0	2.08333	50	35	35	11.7	11.7	313	313	67.8	67.8	8	9	12	9	38	38	7.7	7.6	127	129	0.97	0.97	127	157	147	145	3.3	3.3	1
1	1	3	11	4	1	1	2	0	0	0	0	0	3	0	0	0	0	0	0	0	21.5	52	24.4	26.9	8.2	9.7	31	37	6.7	7.9	9	12	24	26	40	55	7.5	7.7	106	109	2.84	4.01	76	92	137	139	3.6	4	0.6
0	0	1	7	13	6	4	3	0	0	4	0	0	0	0	0	0	0	0	0	0	1.45833	82	33.4	33.4	11.1	11.1	85	85	16.6	16.6	14	14	22	22	30	30	8.8	8.8	108	108	1.2	1.2	63	63	140	140	3.5	3.8	1.4
0	0	1	4	14	6	4	4	0	5	0	0	0	0	0	0	0	0	0	0	0	1.75	81	39	39	12.2	12.2	125	125	18.3	18.3	14	14	26	26	28	28	8.3	8.3	104	104	1.86	1.86	172	172	141	141	3.3	4.1	2
0	0	1	6	14	6	5	3	0	0	0	0	0	3	0	0	0	0	0	0	0	2.125	87	34.7	34.7	10.8	10.8	227	227	15.3	15.3	14	14	24	24	31	31	7.8	7.8	107	107	1.4	1.4	149	149	141	141	4.4	4.4	1.6
0	1	1	5	15	6	5	4	0	0	0	0	0	5	0	0	0	0	0	0	0	5	64	32.3	32.3	10.6	10.6	178	178	4	4	7	11	29	32	14	20	8	8	99	100	0.75	0.85	144	161	135	135	3.8	3.9	1.7
0	1	2	5	14	5	5	4	0	0	0	0	0	6	0	0	0	0	0	0	0	1.91667	81	28	28	9	9	173	173	9.7	9.7	11	11	18	18	18	18	6.8	6.8	120	120	1.33	1.33	94	94	145	145	4.3	4.3	0.9
0	1	1	6	14	6	5	3	0	2	0	0	0	0	0	0	0	0	0	0	0	1.5	85	31.2	31.2	10.1	10.1	143	143	24.6	24.6	13	13	21	21	35	35	7.4	7.4	113	113	1.74	1.74	91	91	143	143	4.1	4.1	2.8
0	1	2	2	12	6	3	3	0	0	0	0	0	0	0	0	0	3	0	0	0	2.58333	39	14.7	26.1	4.8	8.4	153	153	5.2	7.7	14	14	18	18	61	61	7.2	7.2	108	108	1.15	1.15	118	118	136	136	4.1	4.1	0.8
1	1	2	11	3	1	1	1	0	0	0	0	0	12	0	0	0	0	0	0	0	5.625	39	23.1	23.1	7.9	7.9	46	46	11.7	11.7	18	18	14	14	45	45	7.5	7.5	110	110	2.4	2.4	133	133	138	138	4.1	4.1	2
0	1	2	10	14	6	4	4	0	0	0	0	0	0	1	0	0	0	0	0	0	2.79167	39	18	24.3	6.2	8.3	45	45	9	9	12	14	19	20	27	29	6.8	6.9	106	108	1.36	1.72	109	109	136	136	3.3	4	1.7
1	1	4	6	3	1	1	1	0	0	0	0	0	6	0	0	0	0	0	0	0	7.33333	59	24.7	25.8	7.8	8	162	178	24	40.5	11	15	21	23	19	24	8.9	9.1	105	108	0.9	1.32	93	151	135	138	3.3	5.9	1.5
0	0	1	4	9	1	5	3	0	0	0	0	0	6	0	0	0	0	0	0	0	2.29167	51	25.3	25.3	7.4	7.4	374	374	13.9	13.9	8	11	26	27	14	13	8.3	8.1	113	112	0.97	0.8	138	141	145	146	3.3	3.5	0.6
0	0	1	6	4	1	1	2	0	2	0	0	0	0	0	0	0	0	0	0	0	2.04167	50	42.6	42.6	13.9	13.9	466	466	25.1	25.1	16	16	24	24	45	45	9.6	9.7	104	104	1.07	1.07	160	160	140	140	4.4	4.4	2.2
0	0	1	7	5	1	1	3	0	0	0	0	0	9	0	0	0	0	0	0	0	2.45833	50	39.9	40.3	13.4	13.4	202	272	16.4	19.5	10	12.7	24	23	13	10	8.3	8.3	106	107	1.24	1.02	126	151	138	139	2.9	2.9	1.1
0	0	1	7	7	4	1	2	0	0	4	0	0	0	0	0	0	0	0	0	0	2.875	50	26.3	26.3	7.9	7.9	516	516	21.9	21.9	12	12	27	27	37	37	9.6	9.6	107	107	0.46	0.46	126	126	142	142	4.1	4.1	1
0	1	1	9	8	6	1	1	0	0	0	0	0	4	0	0	0	0	0	0	0	11.125	70	34.1	34.1	10.3	10.3	143	143	20.6	20.6	10	10	35	35	46	46	7.7	7.7	101	101	1.51	1.51	100	100	141	141	4.5	4.5	1.4
0	1	1	9	15	6	5	4	0	0	0	0	0	3	0	0	0	0	0	0	1	2.54167	63	28.3	28.3	9.2	9.2	132	132	3.9	3.9	12	12	20	20	41	41	6.1	6.1	114	114	2.81	2.81	96	96	142	142	4	4	0.9
1	1	1	5	13	6	3	4	0	0	5	0	0	0	0	0	0	0	0	0	0	1.125	70	26.3	33.5	8.5	11	167	168	15.3	24.6	14	14	28	28	44	44	7.5	7.5	104	104	0.95	0.95	128	128	142	142	4.1	4.1	2.4
0	1	1	3	3	1	1	1	0	0	0	0	0	5	0	0	0	0	0	0	0	2.45833	66	38.8	38.8	13.1	13.1	245	245	24.8	24.8	11	11	28	28	18	18	8.2	8.2	105	105	0.84	0.84	126	126	140	140	3.9	4.1	0.5
0	1	1	5	15	6	5	4	0	0	0	0	0	2	0	0	0	0	0	0	1	1.70833	61	29.8	31.1	9.6	10.2	141	161	13.5	27.7	16	16	24	24	42	43	7.3	8.2	101	101	4.21	4.63	110	134	137	137	3.5	4.1	1.9
0	1	1	9	10	6	3	1	0	2	0	0	0	0	0	0	0	0	0	0	0	3.125	72	21	24.6	7	8.2	39	59	8.3	10	11	11	29	29	30	30	8.2	8.2	108	108	1.33	1.33	133	133	144	144	4	4	1.1
0	1	1	6	15	6	5	4	0	0	0	0	0	0	0	0	0	0	0	0	0	1.25	66	39.5	43.1	13.6	15.7	109	138	4.6	6.4	13	13	20	20	22	22	7.5	7.5	113	113	1.3	1.3	103	103	142	142	3.5	3.5	1.1
0	1	1	5	15	6	5	4	0	0	1	0	0	0	0	0	0	0	0	0	0	6.58333	64	23.2	26.2	7.4	8.4	152	152	20	20	17	18	21	22	100	124	8.6	8.9	99	101	7.02	8.77	129	233	133	135	4.9	5.2	0.9
0	1	1	10	3	1	1	1	0	0	0	0	0	3	0	0	0	0	0	0	0	10.0833	56	28.3	28.3	8.2	8.2	196	196	10.8	10.8	11	15	25	28	66	69	7.7	8.2	132	133	4.21	4.34	224	291	161	170	3.6	6.3	0.6
0	1	1	7	15	6	5	4	0	0	3	0	0	0	0	0	0	0	0	0	0	2.45833	72	40.8	40.8	14	14	166	166	14.5	14.5	11	11	24	24	21	21	9	9	106	106	1.33	1.33	143	143	137	137	3.9	3.9	0.8
0	0	1	7	8	1	4	3	0	0	0	0	0	3	0	0	0	0	0	0	0	2.91667	49	32.5	33.5	10.5	10.7	250	259	13.1	15.8	11	13	24	27	42	47	8.9	9.1	105	107	1.73	1.92	146	163	137	140	4.8	5.2	0.4
0	1	1	5	13	6	3	4	0	0	7	0	0	0	0	0	0	0	0	0	0	24.4583	50	36.6	36.6	12.1	12.1	223	223	7.9	7.9	11	11	31	31	10	10	8.5	8.5	105	105	0.9	0.9	164	164	144	144	3.4	3.4	2.5
0	1	1	8	7	2	1	4	0	0	0	0	0	4	0	0	0	0	0	0	0	15.125	82	31	31	10.6	10.6	66	66	10.9	10.9	15	15	20	20	53	53	8.2	8.2	104	104	1.91	1.91	299	299	135	135	4.3	4.3	2
0	0	1	3	15	6	5	4	0	0	0	0	0	2	0	0	0	0	0	0	0	6.83333	31	28.8	28.8	10.1	10.1	304	304	16.5	16.5	15	16	19	19	44	48	6.7	7.2	100	103	2.63	3.17	232	286	132	133	2.7	4.3	4.2
1	0	1	13	3	1	1	1	0	0	0	0	0	0	0	0	0	0	0	0	1	246.875	77	25.2	27.5	8	8.6	69	97	13.4	16.1	14	15	27	28	35	45	8.2	8.8	94	98	1.73	2	83	98	132	136	3.6	4	1.2
0	0	1	4	15	6	5	4	0	0	0	0	0	8	0	0	0	0	0	0	0	1.41667	59	28.4	28.4	9.2	9.2	242	242	9.8	9.8	15	15	17	18	19	27	7.6	7.7	104	111	1.03	1.49	87	93	134	139	3.4	3.9	0.6
0	1	3	12	12	5	5	2	0	0	0	0	0	2	0	0	0	0	0	0	0	4.04167	69	30.4	31.1	8.8	9.4	222	230	11.5	13.1	15	16	23	25	91	107	7.2	7.4	114	115	2.6	3.3	208	239	147	150	4.8	5.8	5.2
0	0	1	2	13	6	3	4	0	0	2	0	0	0	0	0	0	0	0	0	0	5.08333	73	28.2	28.2	9.4	9.4	368	368	7.7	7.7	11	15	21	24	9	18	8.5	8.6	105	107	0.97	1.39	99	111	137	139	3.3	3.6	0.5
0	0	1	4	15	6	5	4	0	0	0	0	0	3	0	0	0	0	0	0	0	2.875	83	22.3	34.7	7.8	12.1	310	310	26.8	26.8	24	24	12	12	70	70	7.6	7.6	108	108	2.8	2.8	228	228	139	139	4.8	4.8	1
0	0	1	5	3	1	1	1	0	0	4	0	0	0	0	0	0	0	0	0	0	14.875	55	31.9	31.4	10.1	9.8	139	142	4	3.1	9.2	7	32	30	25	20	8.5	7.9	110	108	1	0.56	142	112	146	143	3.7	3.4	0.8
0	0	1	3	10	6	3	1	0	0	2	0	0	0	0	0	0	0	0	0	0	11.4167	62	38.1	38.1	12.8	12.8	167	167	7.9	7.9	10	10	31	31	18	18	8.8	8.8	100	100	0.81	0.81	141	141	137	137	4.2	4.2	1.6
1	1	1	12	14	6	4	4	0	0	3	0	0	0	0	0	0	0	0	0	0	9.83333	34	21.4	24.6	7.4	8.3	70	70	21.3	21.3	16	16	27	27	86	86	8.7	8.7	98	98	3.02	3.02	108	108	137	137	4.1	4.1	3.2
0	0	1	6	6	1	3	2	0	4	0	0	0	0	0	0	0	0	0	0	0	3.58333	59	33.9	33.9	11	11	395	395	30.7	30.7	14	14	23	23	17	17	8.4	8.4	104	104	1.82	1.82	68	68	136	136	4.9	4.9	2.5
0	0	1	6	8	3	1	4	0	0	0	0	0	0	0	0	0	0	0	0	0	2.08333	74	33.3	33.3	10.2	10.2	222	222	8.6	8.6	14	14	29	29	22	22	7.6	7.6	101	101	1.48	1.48	158	158	140	140	3.9	3.9	3.7
1	0	4	10	3	1	1	1	0	0	0	0	0	5	0	0	0	0	0	0	0	1.29167	70	30.3	30.3	9.7	9.7	440	440	20.5	20.5	21	21	18	18	77	77	7.5	7.5	100	100	4.9	4.9	151	151	133	133	5.5	5.5	2.3
0	1	1	10	8	2	5	1	0	0	4	0	0	0	0	0	0	0	0	0	0	14.9167	66	38	38	12.1	12.1	116	116	4.1	4.1	12	12	29	29	19	19	8.4	8.4	103	103	1.4	1.4	154	154	140	140	3.7	3.7	2.4
0	0	1	9	7	1	3	3	0	0	0	4	0	0	0	0	0	0	0	0	0	3.79167	81	32.3	32.3	10.6	10.6	248	248	12.4	12.4	14	15	25	26	30	32	8.2	8.2	106	106	2	2.1	127	150	142	143	3.2	4.1	1
0	1	1	3	15	6	5	4	0	0	0	0	0	5	0	0	0	0	0	0	0	1.66667	59	30.5	32.6	10.3	10.8	229	234	15.3	16.8	13	14	19	21	30	39	7.6	7.8	105	109	1.51	2.19	70	83	133	138	4.5	5	1.2
1	0	1	10	3	1	1	1	0	0	0	0	0	7	0	0	0	0	0	0	0	13.25	86	27.8	27.8	8.9	8.9	296	296	21.3	21.3	16	16	18	23	68	68	8.2	8.2	106	109	2.54	2.54	158	302	138	140	4.5	5.2	1.7
0	0	1	5	15	6	5	4	0	0	0	0	0	0	0	0	0	2	0	0	0	1.08333	86	32.7	32.7	10.4	10.4	392	392	31.4	31.4	15	15	20	20	30	30	8.7	8.7	108	108	1.08	1.08	118	118	140	140	3	3.8	2.8
0	0	1	10	6	1	1	4	0	0	0	0	0	3	0	0	0	0	0	0	0	5.29167	44	26.6	26.6	8.6	8.6	213	213	18.5	18.5	12	12	26	26	32	32	7.7	7.7	107	107	1.03	1.03	119	119	142	142	3.3	3.8	0.6
0	1	1	7	13	6	4	3	0	0	0	0	0	4	0	0	0	0	0	0	1	1.125	89	30.9	30.9	9.3	9.3	117	117	7.7	7.7	12	12	27	27	61	61	7.9	7.9	104	104	5.77	5.77	76	76	139	139	4.4	4.4	1.5
1	1	4	16	3	1	1	1	0	0	0	0	0	6	0	0	0	0	0	0	0	1.125	46	22	28.3	7	9	68	139	10.2	18.5	25	34	7	18	11	22	7.1	9.1	103	106	2.06	2.86	62	101	138	144	2.8	3.8	17.2
0	0	1	6	3	1	1	1	0	0	3	0	0	0	0	0	0	0	0	0	0	8.70833	38	35.6	35.6	12.1	12.1	275	275	22.9	22.9	13	13	24	24	10	10	7.8	7.8	106	106	1	1	132	132	139	139	4.1	4.1	1.3
1	0	1	9	12	4	4	4	0	2	0	0	0	0	0	0	0	0	0	0	1	3.375	85	40.6	44.6	13	14.4	43	48	3.4	6.4	18	20	28	30	36	42	8.6	8.7	89	89	4.29	4.88	93	143	130	134	5	5.2	2.5
0	0	1	7	7	2	1	4	0	0	0	0	0	6	0	0	0	0	0	0	0	2.20833	78	36.1	36.1	11.5	11.5	282	282	18.6	18.6	13	13	28	28	35	35	8.7	8.7	105	105	2.1	2.1	129	129	142	142	3.6	3.6	1
0	0	1	5	14	6	5	3	0	0	0	0	0	7	0	0	0	0	0	0	0	2.75	60	22	26.2	7.5	8.8	118	149	13.8	18.6	12	13	20	21	17	18	7.2	7.3	107	107	1.02	1.08	101	128	136	136	4.1	4.3	1.2
0	0	2	6	14	6	4	4	0	0	1	0	0	0	0	0	0	0	0	0	0	2.08333	60	26.4	30	8.8	9.7	233	260	24.9	29.6	16	18	18	18	47	49	7.1	7.2	114	114	2.3	4.1	172	192	144	146	3.6	4.1	1.2
0	0	1	2	9	5	1	3	0	0	0	0	0	4	0	0	0	0	0	0	0	3.29167	62	37.2	37.2	11.1	11.1	195	195	10.8	10.8	9	9	33	33	21	21	8.6	8.6	100	100	0.8	0.8	291	291	138	138	4.3	4.9	2.8
0	0	1	8	8	3	1	4	0	3	0	0	0	0	0	0	0	0	0	0	0	1.08333	56	29.2	29.2	9.5	9.5	164	164	8	8	11	16	20	25	14	26	6.9	7.7	106	107	0.8	1.5	125	171	138	139	4	4.9	1.1
0	1	1	2	3	1	1	1	0	0	0	0	0	6	0	0	0	0	0	0	0	3.70833	91	26.6	28.1	8.9	9.6	229	221	19.6	19.7	14.7	15	20	20	44	34	7.8	7.9	103	105	1.56	1.6	164	202	138	138	3	4	1.8
0	1	1	6	15	6	5	4	0	0	2	0	0	0	0	0	0	0	0	0	0	8.375	64	41.2	41.2	13.6	13.6	162	162	18.2	18.2	15	15	27	27	18	18	8.4	8.4	103	103	1.34	1.34	96	96	141	141	3.9	3.9	6
0	1	1	3	15	6	5	4	0	0	0	0	0	4	0	0	0	0	0	0	0	1.375	66	22.1	23.7	7.2	7.7	278	278	4.7	4.7	14	14	24	24	21	21	7.4	7.4	106	106	1.7	1.7	114	114	140	140	4.4	4.4	1.4
0	1	1	7	14	6	5	3	0	0	0	0	0	2	0	0	0	0	0	0	0	10.5417	56	23.1	23.1	8.2	8.2	168	168	25.8	25.8	15	15	22	22	18	18	7	7	99	99	1.22	1.22	161	161	133	133	3.4	3.4	1.4
0	1	1	5	12	4	4	4	0	0	0	0	0	6	0	0	0	0	0	0	0	6.125	88	25	25.4	8.5	8.5	187	187	7.8	7.8	19	19	17	17	62	62	8.4	8.4	107	107	2.21	2.21	94	94	137	137	5.5	6.2	3.4
0	1	1	3	13	4	5	4	0	0	0	0	0	7	0	0	0	0	0	0	0	4.125	74	35.7	41	11.9	13.7	154	161	9.7	16.4	10	13	21	23	26	40	7.8	7.9	112	113	0.8	1.23	97	111	142	143	3	3.5	1.5
0	1	1	3	14	6	4	4	0	0	0	0	0	3	0	0	0	0	0	0	0	1.16667	73	34.2	34.2	11.6	11.6	124	124	6.3	6.3	8	8	29	29	27	27	8.7	8.7	99	99	2.56	2.77	177	177	132	132	4.2	4.2	0.5
0	1	1	4	14	6	4	4	0	0	0	0	0	4	0	0	0	0	0	0	0	2.41667	67	37.8	37.8	12.8	12.8	223	223	22.1	22.1	13	13	23	23	28	28	7.6	7.6	108	108	1.6	1.6	162	162	140	140	4.1	4.1	1.3
0	1	1	4	12	5	4	3	0	0	0	0	0	7	0	0	0	0	0	0	0	6.04167	72	25.9	25.9	8.9	8.9	211	211	16.1	16.1	15	15	19	19	22	22	7.3	7.3	104	104	0.99	0.99	147	147	134	134	4.2	4.2	1.1
0	1	1	6	9	6	2	1	0	2	0	0	0	0	0	0	0	0	0	0	0	2.91667	91	26.2	31.1	8.3	10.2	281	281	20.6	20.6	13	16	15	17	60	61	6.5	7.1	115	116	5.61	5.97	73	111	142	142	4.3	4.4	0.8
1	1	1	8	13	6	5	2	0	0	0	0	0	6	0	0	0	0	0	0	0	1.66667	85	20	29.8	6.4	9.6	105	137	14.5	19.4	16	17	22	24	75	81	7.4	7.7	117	121	2.53	2.73	99	109	151	153	5.5	6.1	0.9
0	1	1	2	13	6	5	2	0	0	0	0	0	5	0	0	0	0	0	0	0	1.66667	55	23.8	23.8	7.6	8.2	177	177	16.9	16.9	14	14	23	23	25	25	8.5	8.5	114	114	1.99	2.01	99	99	147	147	4.1	4.1	0.8
1	1	1	7	12	5	4	3	0	0	0	0	0	3	0	0	0	0	0	0	0	3.45833	91	38.3	38.3	12.4	12.4	182	182	11.9	11.9	10	10	31	31	24	24	8.5	8.5	111	111	1.26	1.26	126	126	144	148	4	4	1.7
0	0	1	6	14	6	5	3	0	0	0	0	0	0	0	0	0	0	0	0	0	4.95833	85	32	32	10.1	10.1	134	134	12.4	12.4	9	14	25	27	45	46	7.2	7.4	98	101	2.08	2.27	117	233	130	135	4.1	4.7	0.8
0	0	2	4	14	6	5	3	0	8	0	0	0	0	0	0	0	0	0	0	0	1.08333	56	30.3	30.3	9.9	9.9	210	210	14.7	14.7	16	16	21	21	35	35	8.1	8.1	105	105	3.7	3.7	99	99	138	138	4.4	4.4	0.5
1	1	3	4	8	3	1	4	0	0	0	0	0	6	0	0	0	0	0	0	0	15.2917	41	28.5	28.5	9.4	9.4	192	192	12.9	12.9	3	3	37	37	10	10	9.3	9.3	107	107	0.57	0.57	167	167	144	144	3.2	3.2	0.8
0	1	2	4	11	6	4	1	0	0	0	0	0	5	0	0	0	0	0	0	0	3.25	53	38.2	43.7	12.7	14.6	214	237	10.9	12.1	12	17	21	26	22	33	7.6	8.4	107	115	1.14	2	280	551	145	149	3.4	4.3	2.7
0	0	1	10	9	4	1	4	0	0	0	0	0	3	0	0	0	0	0	0	0	17.7917	71	27.9	30	8.9	10	254	269	20	25.4	12	13	24	30	57	61	7	7.6	100	107	2.21	2.5	144	184	139	139	3.5	4	1.6
0	0	1	5	15	6	5	4	0	0	0	0	0	3	0	0	0	0	0	0	0	2.66667	74	29.5	29.8	9.9	10	126	120	2.9	3.2	15	19	19	22	40	53	7.2	7.5	99	102	1.62	1.91	125	228	132	133	3.8	4.5	1.4
0	0	1	2	10	2	4	4	0	0	0	0	0	3	0	0	0	0	0	0	0	2.91667	53	45.7	45.7	12.9	12.9	122	122	6	6	1	0	58	58	15	15	8.9	8.9	100	100	0.8	0.8	128	128	144	144	4.8	4.8	0.4
0	0	2	10	13	6	5	2	0	0	2	0	0	0	0	0	0	0	0	0	0	4.41667	57	26.4	27	7.9	8.2	93	99	5.9	6.2	6	6	41	41	18	18	9.7	9.7	96	96	1	1	158	158	138	138	4.9	4.9	1.6
0	0	1	4	15	6	5	4	0	0	0	0	0	3	0	0	0	0	0	0	0	9.95833	62	25.1	25.1	8.4	8.4	467	467	7.8	7.8	7	7	30	30	16	16	8	8	105	105	0.73	0.73	191	191	138	138	3.9	3.9	0.5
0	0	1	8	14	6	5	3	0	0	2	0	0	0	0	0	0	0	0	0	0	3.29167	78	29.8	29.8	9.8	9.8	71	71	9.3	9.3	13	13	19	21	36	44	7.2	7.7	112	114	0.98	1.54	117	158	142	143	3.1	4.8	1.8
0	0	1	6	4	1	1	2	0	0	0	0	0	4	0	0	0	0	0	0	0	1.70833	72	34.9	34.9	11.4	11.4	134	134	21.4	21.4	14	14	28	28	36	36	8.2	8.2	94	94	1.77	1.77	95	95	132	132	4.3	4.3	0.3
0	0	1	12	7	1	5	1	0	0	0	0	0	2	0	0	0	0	0	0	0	5.04167	72	32	34.4	10.5	11.2	196	214	11.1	13.1	14	15	24	27	44	48	8	8.4	94	98	1.66	1.79	82	98	131	134	3.2	4.1	0.9
0	0	1	7	9	5	1	3	0	0	0	0	0	5	0	0	0	0	0	0	0	2.08333	71	29.5	42.4	9.2	13.9	127	276	24.1	31.2	13	19	20	23	18	23	6.7	7	106	111	1.28	1.59	137	346	142	143	3.2	4.1	3.2
0	0	1	6	10	2	4	4	0	0	0	0	0	4	0	0	0	0	0	0	0	4.16667	72	47.3	47.3	15.7	15.7	100	100	17.7	17.7	10	10	35	35	28	28	8.6	8.6	101	101	1.58	1.58	388	388	142	142	3.6	4.3	1.7
0	0	1	5	15	6	5	4	0	2	0	0	0	0	0	0	0	0	0	0	1	1.08333	72	30.8	30.8	9.4	9.4	228	228	47.8	47.8	21	21	16	16	66	66	8.7	8.7	104	104	4.9	4.9	120	120	136	136	5	5	4.9
0	0	1	3	13	4	5	4	0	0	0	0	0	6	0	0	0	0	0	0	0	1.04167	65	33.9	33.9	12	12	601	601	15.8	15.8	12	15	13	19	8	10	6.6	6.6	117	119	0.52	0.59	166	241	144	145	3	3.3	0.6
0	0	1	4	9	6	2	1	0	0	0	0	0	4	0	0	0	0	0	0	0	2.04167	63	29.4	29.4	9.4	9.4	103	103	10.8	10.8	13	13	24	24	21	21	7.4	7.4	107	107	1.12	1.12	180	180	140	140	3.9	3.9	0.8
0	0	1	11	8	4	1	3	0	0	0	0	0	4	0	0	0	0	0	0	1	2.125	65	23	23	7	7	123	123	16	16	15	15	25	25	58	58	7.4	7.4	105	105	5.58	5.58	155	155	140	140	4.7	4.7	2.1
0	0	1	6	13	6	5	2	0	0	0	0	0	6	0	0	0	0	0	0	0	2.33333	62	25.8	25.8	8.6	8.6	311	311	27.1	27.1	14	14	26	26	36	36	8	8	102	102	1.7	1.7	119	119	138	138	3.7	3.7	1.9
0	0	1	6	15	6	5	4	0	0	0	0	0	3	0	0	0	0	0	0	0	3.54167	64	23.8	24	7.5	7.8	80	81	3.8	5.7	16	16	17	17	27	27	6.5	6.5	110	110	1.46	1.46	133	133	140	140	3.2	4.2	1.5
0	0	1	8	14	6	5	3	0	0	0	0	0	0	4	0	0	0	0	0	0	1.75	54	25.8	25.8	8.9	8.9	72	72	4.9	4.9	11	11	24	24	9	9	6.7	6.7	99	99	0.78	0.78	79	79	131	131	2.5	3.1	1.4
0	0	1	6	14	6	5	3	0	0	3	0	0	0	0	0	0	0	0	0	0	2.04167	71	23.7	23.8	7.1	7.2	109	109	4	4	13	13	23	23	27	27	7.4	7.4	109	109	1.15	1.15	182	182	140	140	4.5	4.5	3
0	0	1	2	12	6	5	1	0	0	0	0	0	4	0	0	0	0	0	0	0	1.58333	26	29.9	30.9	9.6	9.7	287	287	21.3	21.3	10	10	32	32	18	18	8.2	8.2	98	98	1.4	1.4	113	113	136	136	3.9	3.9	1.7
0	0	1	5	14	6	5	3	0	0	0	0	0	3	0	0	0	0	0	0	0	2	46	32	32	11.1	11.1	100	100	10.2	10.2	9	15	19	22	10	14	6.9	7.2	100	106	0.76	0.82	117	130	129	136	2.4	3.6	0.7
0	0	2	3	8	3	1	4	0	0	0	0	0	5	0	0	0	0	0	0	0	2.20833	29	31.3	31.3	9.3	9.3	249	249	5.9	5.9	10	10	27	27	10	10	8.3	8.3	103	103	0.63	0.63	99	99	137	137	3.3	3.3	0.94
0	0	2	2	6	1	1	4	0	0	0	0	0	4	0	0	0	0	0	0	0	15.25	29	31.2	31.2	9.1	9.1	237	237	17.1	17.1	12	12	23	23	17	17	8	8	108	108	0.42	0.42	106	106	139	139	3.5	3.5	1.1
0	1	1	4	15	6	5	4	0	0	4	0	0	0	0	0	0	0	0	0	0	3.45833	67	41.4	41.4	14.1	14.1	229	229	18	18	18	18	23	23	55	55	7.8	7.8	97	97	1.67	1.67	309	309	134	134	4.1	4.1	2
0	1	1	10	14	6	5	3	0	0	1	0	0	0	0	0	0	0	0	0	0	2.125	86	18.6	18.6	6.1	6.1	156	156	15	15	16	16	22	22	44	44	7.5	7.5	112	112	2.35	2.35	84	84	146	146	4.1	4.1	0.8
0	0	1	6	10	2	4	4	0	0	0	0	0	2	0	0	0	0	0	0	0	4.75	44	19.3	20.6	6.6	7	28	33	5.5	5.7	13	14	23	23	14	17	7	7.3	108	113	0.99	1.05	115	121	142	146	2.5	3.4	1.8
0	0	1	12	3	1	1	1	0	0	0	0	0	3	0	0	0	0	0	0	0	6.625	67	24.4	31.3	8.6	10.7	204	256	12.2	13.3	14	18	17	27	32	49	6.6	7.4	102	107	2.36	3.86	179	203	136	140	3.2	4.7	3.1
0	1	1	6	7	1	3	3	0	0	0	0	0	5	0	0	0	0	0	0	0	2.625	70	42.4	42.4	14	14	141	141	13.4	13.4	13	13	25	25	24	24	8.2	8.2	106	106	1.21	1.21	263	263	140	140	4.2	4.2	1.8
0	0	1	8	7	4	1	2	0	0	4	0	0	0	0	0	0	0	0	0	0	1.95833	67	24	24.9	8.4	8.7	193	193	13.7	13.7	13	15	16	22	48	73	5.5	6.5	102	112	0.8	1.3	147	251	133	139	3.3	5.6	1
1	1	1	6	3	1	1	1	0	0	0	0	0	4	0	0	0	0	0	0	0	4.66667	54	25.9	25.9	9	9	76	83	3.8	3.8	19	20	17	20	100	112	9.7	9.7	98	104	2.52	3.21	105	107	133	137	3.8	4.3	2.3
0	0	1	2	10	4	2	4	0	0	0	0	0	8	0	0	0	0	0	0	0	2.66667	74	32.4	32.4	11	11	467	467	13.3	13.3	11	11	21	21	10	10	6.8	6.8	114	114	0.98	0.98	123	123	142	142	4.4	4.4	0.8
0	0	1	4	14	6	5	3	0	0	0	0	0	7	0	0	0	0	0	0	0	2.41667	39	30.6	30.6	9.3	9.3	70	70	24.3	24.3	15	15	25	25	12	12	8.1	8.1	91	91	0.93	0.93	123	123	127	127	3.8	4.3	1.6
0	0	1	4	7	1	2	4	0	0	0	0	0	2	0	0	0	0	0	0	0	4.70833	56	19.3	28	6.4	8.6	478	478	33.5	33.5	17	28	12	22	20	29	7.4	8.7	96	99	1.34	2.27	133	249	130	134	4.2	7	2.7
0	1	1	7	15	6	5	4	0	0	0	0	0	3	0	0	0	0	0	0	0	1.45833	84	44.8	46.7	15	15.5	129	130	22	22.5	11	13	26	26	30	30	8.8	8.8	105	106	1.93	1.97	134	140	138	140	4.3	4.6	2.2
0	0	2	4	10	6	3	1	0	3	0	0	0	0	0	0	0	0	0	0	0	1.54167	33	37	37	11.7	11.7	262	262	8.3	8.3	11	11	29	29	9	9	8.3	8.3	100	100	1.16	1.16	116	116	137	137	3.2	4.3	0.9
0	1	1	2	14	6	4	4	0	0	0	0	0	6	0	0	0	0	0	0	0	4.29167	79	27.6	27.6	8.6	8.6	188	188	5.9	5.9	14	20	14	21	45	46	9.3	9.6	108	110	1.37	1.57	91	134	137	140	5.3	5.3	1.9
1	1	1	6	9	2	4	3	0	0	0	0	0	5	0	0	0	0	0	0	0	3.29167	79	16.1	24.8	5.2	8.1	211	280	15.8	21.5	14	15	17	19	59	63	8.8	9.1	121	122	1.47	1.57	99	106	149	151	3.9	4.3	2.3
0	1	1	3	15	6	5	4	0	4	0	0	0	0	0	0	0	0	0	0	0	1.16667	68	40.7	40.7	13.1	13.1	103	103	9.9	9.9	15	15	24	24	16	16	7.7	7.7	104	104	1.51	1.51	92	92	139	139	3.7	3.7	1
0	0	1	6	3	1	1	1	0	0	0	0	0	5	0	0	0	0	0	0	0	1.79167	71	30.1	30.1	9.4	9.4	403	403	17.6	17.6	12	12	23	23	21	21	7.9	7.9	104	104	1.1	1.1	96	96	135	135	4.1	4.1	1.6
1	0	1	10	9	2	3	4	0	0	0	0	0	2	0	0	0	0	0	0	0	2.29167	71	29.1	29.1	8.9	8.9	85	85	11.5	11.5	8	11	33	34	66	69	7.8	8	104	105	1.81	2.02	251	308	140	143	4.6	6.4	0.8
0	1	1	5	15	6	5	4	0	0	0	0	0	3	0	0	0	0	0	0	0	1.70833	76	38	38	12.2	12.2	156	156	24.7	24.7	15	15	24	24	21	21	9.3	9.3	103	103	1.73	1.73	126	126	138	138	3.8	3.8	1.7
0	0	1	6	4	1	1	2	0	0	0	0	0	9	0	0	0	0	0	0	0	3.5	57	31.2	31.2	9.8	9.8	307	307	24.8	24.8	14	14	22	22	53	53	8.3	8.3	109	109	3.69	3.69	107	107	141	141	3.4	4.1	0.9
1	1	2	9	7	1	5	1	0	0	0	0	0	3	0	0	0	0	0	0	0	21.75	61	23.9	23.9	7.5	7.5	193	193	36.7	36.7	24	29	11	15	102	129	7.1	7.8	103	108	4.99	6.17	97	115	137	142	4.9	5.4	3.3
1	1	1	13	9	2	4	3	0	2	0	0	0	0	0	0	0	0	0	0	0	5.125	83	35.2	40.6	11.5	13	79	89	9.5	11.3	19	20	20	22	51	55	7.3	7.5	108	108	2.44	2.65	90	129	143	144	4.5	4.9	2.2
0	0	1	6	14	6	5	3	0	0	0	0	0	3	0	0	0	0	0	0	0	2.83333	70	23.3	24.8	7.3	8	142	142	16.7	16.7	17	17	21	21	81	81	8.7	8.7	108	108	2.7	2.7	190	190	142	142	4.3	4.3	1
0	1	1	7	14	5	5	4	0	0	0	0	0	3	0	0	0	0	0	0	0	2.25	82	26.7	30.5	9	10	123	142	15.6	17.8	18	22	16	19	48	52	6.8	6.9	106	107	3.6	3.7	133	195	138	140	4.6	5.5	1.9
1	0	3	10	9	4	1	4	0	0	0	0	0	8	0	0	0	0	0	0	0	4.25	26	29.2	29.2	10.5	10.5	120	120	9.6	9.6	20	21	20	21	14	26	8.6	8.9	112	116	0.31	0.37	87	90	152	153	2.3	2.6	2.7
0	0	1	4	9	1	4	4	0	0	0	0	0	4	0	0	0	0	0	0	0	3.58333	53	30.5	30.5	9.9	9.9	123	123	15.1	15.1	10	10	27	27	56	56	9.2	9.2	111	111	1.2	1.2	169	169	146	146	2.4	2.4	0.4
0	0	1	2	14	6	4	4	0	0	0	0	0	4	0	0	0	0	0	0	0	6.29167	60	30.9	30.9	9.9	9.9	174	174	7.1	7.1	17	17	19	19	16	16	8.1	8.1	109	109	1.14	1.14	169	169	141	141	3.7	3.7	1.4
0	0	1	7	15	6	5	4	0	3	0	0	0	0	0	0	0	0	0	0	0	1.91667	48	26.1	26.1	8.5	8.5	131	131	16.9	16.9	18	18	21	21	15	15	8.8	8.8	105	105	1.77	1.77	116	116	141	141	2.7	4.2	3.7
0	0	1	8	7	5	1	1	0	1	0	0	0	0	0	0	0	0	0	0	0	12.875	48	25.8	27.8	8.8	9.5	278	300	19.6	19.9	8	12	30	32	11	12	7.4	7.9	100	102	1.12	1.14	83	105	137	141	2.5	3.6	0.9
1	0	1	10	3	1	1	1	0	0	0	0	0	5	0	0	0	0	0	0	0	1.20833	83	36.2	44.2	11.9	14.6	109	148	44.6	48.5	20	20	16	16	69	69	6.2	6.2	116	116	4.57	4.57	154	154	147	147	4.7	4.7	5.1
0	0	2	4	14	5	5	4	0	2	0	0	0	0	0	0	0	0	0	0	0	2.75	67	33.1	33.1	10.7	10.7	422	422	27.1	27.1	13	13	23	23	39	39	7.9	7.9	106	106	3.37	3.37	130	130	138	138	4.1	4.1	1.2
0	0	1	5	14	6	5	3	0	0	0	0	0	3	0	0	0	0	0	0	0	2.625	58	31.6	31.6	9.9	9.9	182	182	14	14	18	18	17	17	35	35	7.2	7.2	107	107	3.8	3.8	32	32	137	137	4.7	5.2	0.7
1	0	1	7	9	5	1	3	0	0	0	0	0	7	0	0	0	0	0	0	1	2.75	91	30.9	30.9	9.8	9.8	104	104	11	11	17	17	20	20	59	59	7.3	7.3	106	106	6.11	6.11	149	149	138	138	5.1	5.1	2
0	0	1	4	8	1	4	3	0	1	0	0	0	0	0	0	0	0	0	0	0	1.33333	55	27.6	35.4	10.2	12.6	185	241	2.6	7.9	7	12	22	27	11	17	6.1	6.9	105	112	0.6	1.12	91	203	138	142	2.8	3.7	1.1
0	0	2	7	13	6	5	2	0	0	0	0	0	2	0	0	0	0	0	0	0	3.125	77	29	30.4	9.6	10	206	206	19.6	19.8	16	18	18	20	71	73	8.2	8.4	112	113	4	4.3	181	206	143	143	5	5.7	0.9
1	0	1	6	6	1	1	4	0	3	0	0	0	0	0	0	0	0	0	0	0	10.5833	69	30.6	34.9	9.6	10.6	298	298	29.7	29.7	12	12	28	28	31	31	8.9	8.9	100	100	1.4	1.4	115	115	136	136	3.6	3.6	0.6
0	0	1	5	14	6	5	3	0	4	0	0	0	0	0	0	0	0	0	0	0	1.66667	85	39.5	39.5	12.6	12.6	186	186	13.4	13.4	10	10	29	29	16	16	7.7	7.7	105	105	0.95	0.95	122	122	140	140	3.6	4	2.1
0	1	1	11	3	1	1	1	0	0	4	0	0	0	0	0	0	0	0	0	0	1.16667	75	25.1	26.2	8.4	8.8	99	99	12.5	12.5	14	14	20	20	23	23	8.3	8.3	105	105	1.39	1.39	144	144	136	136	2.8	4.1	5.5
0	0	1	6	11	5	4	2	0	5	0	0	0	0	0	0	0	0	0	0	0	1.16667	70	29.1	29.1	9	9	547	547	9.9	9.9	12	12	29	29	10	10	9	9	104	104	0.78	0.78	101	101	141	141	3.8	3.8	0.8
0	0	1	9	7	2	1	4	0	0	0	0	0	0	0	0	0	2	0	0	0	8.04167	68	27.3	28.2	9.1	9.3	117	117	13	13	21	24	25	27	70	73	5.6	6.1	91	95	4.2	4.4	154	172	136	138	4.2	4.5	1
0	0	1	4	15	6	5	4	0	0	0	0	0	3	0	0	0	0	0	0	0	5.70833	91	38.1	38.1	12.1	12.1	186	186	5.2	5.2	12	12	23	23	22	22	8.6	8.6	111	111	0.93	0.93	121	121	142	142	4	4	0.6
1	0	1	9	3	1	1	1	0	0	0	0	0	8	0	0	0	0	0	0	0	1.08333	91	28.1	38.8	8.9	11.4	285	438	15.1	18.7	17	25	22	29	41	42	6.8	7.3	95	98	3.6	4.01	198	364	138	141	3	4	4.3
0	0	1	3	14	5	5	4	0	0	0	0	0	0	0	0	0	0	0	0	0	1.875	67	31.3	31.3	10.4	10.4	225	225	25.9	25.9	13	13	21	21	21	21	7.2	7.2	112	112	1.2	1.2	140	140	142	142	3.7	3.7	6.7
1	1	2	5	15	6	5	4	0	0	0	0	0	3	0	0	0	0	0	0	0	1.41667	33	23.4	23.6	8.3	8.5	55	55	7.2	7.2	13	16	19	20	2	2	7.2	7.5	112	118	0.8	0.8	79	227	143	148	3	3.9	0.9
0	1	1	3	15	6	5	4	0	0	0	0	0	7	0	0	0	0	0	0	0	1.95833	26	35.5	35.5	12.4	12.4	191	191	5.6	5.6	10	10	29	29	12	12	8.2	8.2	100	100	0.81	0.81	113	113	136	136	3.4	3.4	1
0	0	1	7	15	6	5	4	0	0	0	4	0	0	0	0	0	0	0	0	0	6.29167	47	31.4	31.4	10.3	10.3	124	124	10.6	10.6	10	12	16	19	31	33	7.7	8	109	109	0.76	0.76	136	121	133	136	4.3	5.4	0.8
1	0	1	13	3	1	1	1	0	0	0	0	0	7	0	0	0	0	0	0	0	15.125	65	22.2	27.3	7.5	9.3	59	93	10.1	17.3	21	25	11	13	16	21	7.1	7.7	99	104	1.3	1.63	124	137	131	136	2.9	4.4	3.1
1	0	1	11	3	1	1	1	0	0	3	0	0	0	0	0	0	0	0	0	0	6.16667	68	30.3	30.3	10.4	10.4	30	30	10	10	4	16	18	21	72	73	7.6	7.9	104	111	1.88	2.14	94	154	132	136	3.3	4	1.7
0	0	3	5	15	6	5	4	0	3	0	0	0	0	0	0	0	0	0	0	0	2.25	45	22.4	22.4	7.9	7.9	102	102	10.3	10.3	11	11	22	22	16	16	6.7	6.7	108	108	0.76	0.76	129	129	138	138	3.2	3.2	1.7
0	0	3	10	15	6	5	4	0	4	0	0	0	0	0	0	0	0	0	0	0	2.20833	82	29	29	9.9	9.9	144	144	12.2	12.2	10	10	25	25	12	12	7.5	7.5	102	102	0.6	0.6	92	92	133	133	3	3.7	1
0	0	2	8	7	4	1	2	0	4	0	0	0	0	0	0	0	0	0	0	0	2.91667	37	31.4	31.4	10.2	10.2	254	254	16.9	16.9	9	9	29	29	8	8	8.2	8.2	109	109	1.2	1.2	128	128	143	143	4	4	1.1
0	0	1	5	15	6	5	4	0	0	0	0	0	0	3	0	0	0	0	0	0	1.83333	70	31.8	31.8	10.3	10.3	176	176	7.1	7.1	14	14	19	19	9	9	7.9	7.9	110	110	0.86	0.86	190	190	139	139	3.7	3.7	1.5
0	0	1	5	15	6	5	4	0	0	2	0	0	0	0	0	0	0	0	0	0	3.54167	78	26	28.3	8.3	9.4	174	174	29.2	29.2	12	12	24	24	31	31	8.4	8.4	110	110	1.6	1.6	247	247	141	141	4.7	4.7	1.3
0	0	1	2	10	4	5	1	0	0	0	0	0	3	0	0	0	0	0	0	0	1.25	66	23.5	23.5	7.4	7.4	267	267	9.1	9.1	8	8	25	26	7	9	7	7.4	106	108	0.5	0.7	103	120	136	139	3.3	3.3	1.7
1	0	1	5	9	6	2	1	0	0	0	0	0	6	0	0	0	0	0	0	0	4.125	73	30.4	30.4	10.1	10.1	159	159	18.1	18.1	12	12	21	21	31	31	7.3	7.3	101	101	1.51	1.51	367	367	131	131	3.4	3.4	4
0	0	2	5	10	4	5	1	0	1	0	0	0	0	0	0	0	0	0	0	0	1.08333	77	35.3	38	11.3	12.3	133	166	15.9	17.8	16	19	16	19	44	49	7.5	8	110	112	1.8	2	118	175	140	143	4.3	4.8	1.4
0	0	1	4	15	6	5	4	0	2	0	0	0	0	0	0	0	0	0	0	0	1.45833	71	31.7	32.2	9.7	9.7	375	391	16.1	20.7	12	13	26	27	9	13	8.1	8.1	98	99	0.87	1.11	155	155	132	135	3.5	3.9	2
0	1	1	6	8	3	1	4	0	0	0	0	0	3	0	0	0	0	0	0	1	2.83333	31	37.2	37.2	12.2	12.2	175	175	8.6	8.6	20	20	17	17	42	42	7.8	7.8	107	107	6.27	6.27	69	69	140	140	4.1	4.1	0.9
0	1	1	2	11	6	1	4	0	0	0	0	0	6	0	0	0	0	0	0	0	1.25	66	22.5	24.5	7.4	8.2	167	185	7	8.1	13	16	21	25	14	17	7.7	8.2	101	103	0.86	0.91	108	126	135	135	4	4.5	1.6
0	1	1	4	13	4	5	4	0	0	0	0	0	5	0	0	0	0	0	0	0	1.04167	66	23.4	23.4	7.8	7.8	191	191	12.3	12.3	13	13	24	24	17	17	7.8	7.8	105	105	0.92	0.92	132	132	138	138	4	4	1.6
0	1	1	7	3	1	1	1	0	0	0	0	0	6	0	0	0	0	0	0	0	11.125	52	50.1	54.3	15.9	16.8	179	191	9.2	15.1	12	15	28	32	7	7	8.8	9.1	106	111	0.7	1	208	209	146	151	2.9	3.9	1.5
1	1	1	4	11	2	5	4	0	0	0	0	0	7	0	0	0	0	0	0	0	5.83333	60	42.2	42.2	13.4	13.4	226	226	10.3	10.3	10	10	34	34	17	17	8.2	8.2	100	100	1.14	1.14	121	121	140	140	4.2	4.2	2.1
0	0	1	8	14	6	4	4	0	0	4	0	0	0	0	0	0	0	0	0	0	3.16667	81	25.9	25.9	8	8	149	149	7.5	7.5	13	13	29	29	39	39	9.7	9.7	103	103	0.92	0.92	97	97	141	141	4.1	4.1	1.1
0	0	1	2	15	6	5	4	0	0	0	0	0	4	0	0	0	0	0	0	0	7.79167	67	30.8	30.8	9.5	9.5	213	213	9.7	9.7	11	11	31	31	34	34	8.5	8.5	104	104	1.2	1.2	118	118	142	142	3.7	3.7	0.7
0	0	1	4	14	6	4	4	0	2	0	0	0	0	0	0	0	0	0	0	0	2.08333	91	38.7	39.1	12.6	12.6	307	325	98.6	99.4	17	17	18	18	45	45	7.7	7.7	107	107	1.91	1.91	156	156	137	137	4.7	4.7	1.8
0	1	1	6	8	1	3	4	0	0	0	0	0	3	0	0	0	0	0	0	0	2.875	91	27.6	32.4	9.5	10.5	158	162	8.6	14.6	16	16	23	23	64	64	8	8	113	113	1.98	1.98	237	237	148	148	3.6	3.6	1.1
1	1	1	7	9	1	4	4	0	0	0	0	0	8	0	0	0	0	0	0	0	2.58333	66	21.2	21.2	7.1	7.1	54	54	0.1	0.1	15	15	21	21	38	38	7.1	7.1	96	96	1.4	1.4	146	146	129	129	3.2	3.7	3.9
0	0	1	5	14	5	5	4	0	3	0	0	0	0	0	0	0	0	0	0	0	2.20833	81	38.6	38.6	12.2	12.2	243	243	14.9	14.9	17	17	19	19	37	37	7.7	7.7	112	112	2.17	2.17	155	155	143	143	4.5	4.5	0.8
0	0	1	6	15	6	5	4	0	0	2	0	0	0	0	0	0	0	0	0	0	1.41667	72	27.1	27.1	8.7	8.7	391	391	12.7	12.7	18	20.2	19	20	20	22	7.6	7.9	101	104	0.97	0.99	165	209	136	140	3.4	3.6	5.5
1	0	2	10	7	1	2	4	0	0	0	0	0	3	0	0	0	0	0	0	0	1.70833	78	27.9	32.1	9.2	10	105	105	19.5	19.5	22	23	18	20	43	48	6.3	6.5	107	110	2.7	3.3	288	359	144	146	4.6	4.9	7.2
0	0	1	8	11	6	2	3	0	0	0	0	0	0	0	0	0	5	0	0	1	2.375	46	28.2	33.5	9.2	11	114	138	5.4	10.1	21	23	15	21	48	96	7.1	7.2	96	101	4.24	7.52	116	303	135	136	3.2	3.2	0.6
0	0	2	5	14	6	5	3	0	0	0	0	0	1	0	0	0	0	0	0	0	4.625	53	22.5	26.9	7.3	8.9	222	229	25.6	32.9	14	14	23	24	50	51	9	9.8	110	113	3.23	3.65	73	83	144	146	3.5	4.2	0.3
0	0	1	4	10	5	1	4	0	0	0	0	0	4	0	0	0	0	0	0	0	1.125	65	36.4	36.4	11.8	11.8	151	151	18.9	18.9	13	13	23	23	15	15	7.5	7.5	108	108	1.07	1.07	112	112	141	141	3	3.9	1.4
1	0	1	7	15	6	5	4	0	0	0	0	0	0	0	0	0	0	0	0	0	3.41667	84	26	26	8.8	8.8	207	207	20.1	20.1	19	19	15	15	29	29	7.2	7.2	95	95	1.73	1.73	107	107	125	125	4.2	4.2	1
0	0	1	2	14	6	5	3	0	3	0	0	0	0	0	0	0	0	0	0	0	1.75	76	30	30	9.7	9.7	218	218	8	8	11	11	26	26	7	7	8.7	8.7	106	106	0.66	0.66	115	115	139	139	4.2	4.2	2.1
0	0	4	4	15	6	5	4	0	0	3	0	0	0	0	0	0	0	0	0	0	1.75	75	44.6	44.6	12.8	12.8	184	184	12.5	12.5	8	8	34	34	32	32	8.4	8.4	105	105	1.15	1.15	121	121	143	143	4.4	4.4	0.9
0	0	1	5	9	5	3	1	0	0	0	0	0	6	0	0	0	0	0	0	0	2	57	23.7	28.2	7	9	550	550	12.6	12.6	12	12	24	24	24	24	7.6	7.6	105	105	0.96	0.96	74	74	138	138	2.8	5.2	0.8
0	1	1	5	14	6	5	3	0	0	0	0	0	0	0	0	0	0	0	0	0	2.25	68	24.2	25.7	8.5	8.9	93	93	9.5	9.5	8	8	28	28	16	16	7.5	7.5	104	104	0.92	0.92	194	194	136	136	3.9	3.9	2.9
0	1	1	8	10	2	5	3	0	0	0	0	0	5	0	0	0	0	0	0	0	1.08333	66	37.5	37.5	12.8	12.8	91	91	7.5	7.5	12	12	26	26	29	29	8	8	106	106	1.59	1.59	92	92	139	139	4.5	4.5	1.9
0	1	1	5	4	1	2	1	0	0	0	0	0	0	0	0	0	3	0	0	0	12.0417	39	24.2	29.9	7.7	9.7	357	462	15	23.2	7	10	26	27	16	19	7.1	7.2	105	107	1.05	1.24	174	202	134	140	3.2	3.7	1.7
0	1	1	3	11	6	2	3	0	0	0	0	0	6	0	0	0	0	0	0	0	3.08333	41	24.4	24.9	8.1	8.5	92	92	10.7	10.7	10	10	27	27	14	14	8.5	8.5	102	102	0.74	0.74	134	134	135	135	3.5	3.5	4.7
0	1	1	6	15	6	5	4	0	0	0	0	0	2	0	0	0	0	0	0	0	2.375	63	28.5	29.1	8.5	8.7	358	375	11.1	11.5	12	16	19	21	47	47	7.4	7.4	111	114	4.13	4.13	90	90	140	142	4.9	6.1	0.8
0	1	3	10	14	6	5	3	0	0	0	0	0	10	0	0	0	0	0	0	0	1.875	45	35.5	39.9	11.7	13.4	76	90	11.1	12.9	15	16	17	21	18	26	7.4	7.7	107	108	1.32	1.85	146	228	135	139	5.2	5.7	2.8
0	0	1	10	7	1	2	4	0	0	0	0	0	6	0	0	0	0	0	0	0	5.75	74	29.6	36	9.6	12.2	122	147	10.6	10.7	12	14	25	30	16	26	8.2	9	97	99	0.74	1.53	144	206	135	135	3.3	3.8	1.4
0	1	1	8	10	6	1	3	0	0	0	0	0	7	0	0	0	0	0	0	0	5.29167	86	32.3	32.3	11.1	11.1	156	156	5.4	5.4	10	13	25	27	25	28	7.5	7.7	96	98	1.15	1.23	90	106	130	131	4	4.1	0.9
0	0	1	3	7	1	4	2	0	0	0	0	0	5	0	0	0	0	0	0	0	10.1667	91	42.2	42.2	13.6	13.6	178	178	5.4	5.4	10	10	29	29	31	31	9.3	9.3	109	109	0.92	0.92	163	163	144	144	4.1	4.1	1.2
0	0	1	10	10	6	3	1	0	0	2	0	0	0	0	0	0	0	0	0	0	23.9167	82	25.1	25.1	8.1	8.1	122	122	10.2	10.2	12	15	22	27	29	30	7.6	8	102	105	2.17	2.25	116	142	136	138	4.1	4.8	1.1
0	0	4	3	15	6	5	4	0	0	0	0	0	5	0	0	0	0	0	0	0	1.125	59	29.2	29.2	9.8	9.8	94	94	8.5	8.5	7	7	29	29	7	7	7.8	7.8	106	106	0.79	0.79	154	154	139	139	3.3	3.4	0.8
0	1	1	4	15	6	5	4	0	6	0	0	0	0	0	0	0	0	0	0	0	4.75	87	32.6	32.6	10.6	10.6	173	173	41.3	41.3	14	14	27	27	59	59	8.4	8.4	100	100	2.56	2.56	124	124	136	136	4.8	4.8	1.3
0	1	1	12	7	3	1	3	0	0	0	0	0	11	0	0	0	0	0	0	0	27.5833	26	28.9	28.9	9.8	9.8	224	224	7.3	7.3	9	11	25	27	13	14	7.9	8	103	106	0.92	0.96	100	108	135	138	3.8	4.1	0.7
0	1	1	10	10	5	1	4	0	0	0	0	0	0	0	0	0	1	0	0	0	3.83333	27	34.9	34.9	11.4	11.4	512	512	28.7	28.7	14	14	23	23	11	11	8.2	8.2	105	105	0.67	0.67	122	122	139	139	3.4	3.4	0.8
0	0	3	5	13	6	4	3	0	0	0	0	0	2	0	0	0	0	0	0	1	5.20833	72	24.7	24.8	8	8.3	150	150	11.1	11.1	8	8	33	33	23	23	8.4	8.4	102	102	2.17	2.17	84	84	139	139	3.8	3.8	1.6
0	1	1	8	15	6	5	4	0	0	0	0	0	7	0	0	0	0	0	0	0	4.33333	80	25.2	26.4	7.6	7.9	33	34	25.1	26	16	16	21	21	41	41	8.2	8.2	103	103	2.15	2.15	103	103	136	136	4.3	4.3	0.9
0	0	1	2	15	6	5	4	0	4	0	0	0	0	0	0	0	0	0	0	0	2.83333	70	31.8	31.8	9.7	9.7	263	263	11.9	11.9	15	15	29	29	33	33	8.9	8.9	103	103	1.7	1.7	269	269	142	142	5	5	1
1	0	1	7	13	6	4	3	0	0	0	0	0	4	0	0	0	0	0	0	0	3.58333	88	37	37	11.7	11.7	155	155	18.2	18.2	16	16	22	23	43	43	8.6	8.9	96	101	1.18	1.35	109	134	131	135	3.7	3.8	1.6
0	0	1	9	14	6	5	3	0	0	0	0	0	4	0	0	0	0	0	0	0	5.45833	91	27.2	27.2	8.3	8.3	142	142	5.1	5.1	10	10	26	26	35	35	8.3	8.3	111	111	1.4	1.4	109	109	143	143	4	4.1	1.7
0	0	1	5	12	5	4	3	0	0	0	0	0	4	0	0	0	0	0	0	0	2.125	91	25.1	28.7	7.6	9.1	173	178	99.1	104.7	14	14	25	25	36	36	7.7	7.7	104	104	1.3	1.3	156	156	139	139	4.2	4.2	1.5
0	0	2	5	9	4	1	4	0	0	0	2	0	0	0	0	0	0	0	0	0	1.54167	30	25.2	25.2	7.2	7.4	428	465	12.1	16.5	19	19	17	18	10	13	7.8	8	109	114	0.7	0.7	141	177	142	147	3	4.1	2.2
0	1	1	8	14	6	4	4	0	0	3	0	0	0	0	0	0	0	0	0	0	1.25	84	32.5	32.5	10.8	10.8	101	101	5.4	5.4	11	11	28	28	13	13	8.2	8.2	109	109	1.16	1.16	112	112	144	144	3.5	3.5	1.8
0	1	3	8	14	6	4	4	0	0	0	0	0	7	0	0	0	0	0	0	1	1.95833	72	26.6	28.2	8.9	9.3	52	52	3.8	3.8	11	11	32	32	23	23	8.8	8.8	96	96	7.26	7.26	90	90	135	135	4.3	4.3	1.2
0	1	1	7	3	1	1	1	0	3	0	0	0	0	0	0	0	0	0	0	0	3.375	77	27	27.3	8.9	9.2	154	160	18.2	20.1	15	15	26	26	97	97	8.6	8.6	105	105	3.98	3.98	159	159	141	141	4.7	4.7	1.6
0	0	1	2	15	6	5	4	0	0	0	0	0	3	0	0	0	0	0	0	0	2.66667	23	32	32	10.6	10.6	256	256	6.7	6.7	17	26	11	17	9	11	6.9	7.8	104	110	1.01	1.42	172	303	138	142	3.5	4.4	3.9
0	0	1	5	7	2	1	4	0	0	0	0	0	6	0	0	0	0	0	0	0	2.91667	49	26.9	27.7	8.9	9.2	169	169	6.3	6.3	11	13	25	26	22	26	6.8	7.2	100	102	1.2	1.26	106	158	134	134	3.1	5.5	1.7
0	0	4	5	3	1	1	1	0	0	0	0	0	0	0	0	0	0	0	0	0	14.2083	55	37.6	37.6	12.5	12.5	288	288	13.5	13.5	14	16	19	20	10	12	7.6	7.8	108	109	0.8	0.9	105	108	137	141	3.7	4.4	1.2
0	0	1	7	3	1	1	1	0	0	0	0	0	0	1	0	0	0	0	0	0	4.45833	46	18.9	26.4	6.1	9.2	110	169	2.9	22.2	12	12	22	22	10	10	7.2	7.2	107	107	1.04	1.04	98	122	138	139	3.1	4.7	1.5
0	0	1	4	15	6	5	4	0	0	0	0	0	6	0	0	0	0	0	0	0	1.33333	77	32.2	36	10.2	11.3	198	280	5.9	10.5	4	8	29	33	26	47	7.9	8.2	100	102	1.2	2.21	128	141	133	134	4.4	4.8	0.6
0	0	1	4	15	6	5	4	0	0	0	0	0	4	0	0	0	0	0	0	0	1.95833	70	28.3	28.3	8.1	8.1	172	172	5.5	5.5	9	9	28	28	26	26	7.1	7.1	110	110	0.99	0.99	116	116	143	143	3.9	3.9	0.7
0	0	1	8	14	5	5	4	0	0	0	0	0	4	0	0	0	0	0	0	0	3.08333	71	34.2	34.2	11.1	11.1	170	170	11.8	11.8	22	23	19	20	13	17	7	7.1	104	105	1.91	2.19	117	180	142	143	3.5	4	4.8
0	0	1	9	12	6	3	3	0	0	5	0	0	0	0	0	0	0	0	0	0	3.75	83	27.5	26.9	9.2	9	53	51	9.4	9.4	9	8	27	27	33	36	8.9	9	98	98	0.52	0.58	151	156	126	131	3.8	4.1	1.4
0	0	1	4	15	6	5	4	0	0	4	0	0	0	0	0	0	0	0	0	0	2.58333	69	32.3	32.3	10.1	10.1	193	193	19.1	19.1	17	17	24	24	19	19	8.5	8.5	99	99	1.3	1.3	427	427	136	136	4.3	4.3	5.2
0	1	1	6	14	6	4	4	0	0	0	0	0	7	0	0	0	0	0	0	0	7.66667	65	24.1	24.1	7.2	7.2	510	510	11.8	11.8	7	7	36	36	21	21	9	9	105	105	0.68	0.68	101	101	144	144	3.9	3.9	0.41
0	1	1	5	15	6	5	4	0	0	3	0	0	0	0	0	0	0	0	0	0	2.95833	85	34.5	35	11.4	11.6	179	184	26.3	33.1	15	16	22	25	25	26	8.7	8.9	101	107	1.76	2.27	150	164	138	141	2.8	4	3.5
0	1	1	5	15	6	5	4	0	0	2	0	0	0	0	0	0	0	0	0	0	2.125	80	34	34	11.1	11.1	109	109	14.4	14.4	11	11	27	27	28	28	8	8	103	103	1.38	1.38	125	125	136	136	4.6	4.6	1
0	1	1	9	14	6	5	3	0	0	0	0	0	3	0	0	0	0	0	0	0	5.08333	37	33.6	33.6	11.4	11.4	367	367	11.7	11.7	20	23	22	27	91	110	7.6	9.3	88	91	5.38	7.11	200	260	129	133	4.4	5.1	1.2
0	1	1	11	8	1	5	2	0	2	0	0	0	0	0	0	0	0	0	0	0	3.91667	88	34.9	34.9	11.8	11.8	123	123	30.4	30.4	19	20	18	18	85	87	7.7	7.8	111	113	3.46	3.54	197	200	143	145	5.2	5.8	1.7
0	1	1	11	6	4	1	1	0	0	0	0	0	2	0	0	0	0	0	0	0	9.79167	66	34.3	41.8	11.8	14.8	145	167	17.8	29.7	14	16	22	24	40	41	6.9	7.7	96	101	1.98	2.37	123	195	131	135	4.2	4.5	1.3
0	0	1	4	15	6	5	4	0	0	0	4	0	0	0	0	0	0	0	0	0	1.33333	87	25.3	25.3	8.1	8.1	274	274	8.6	8.6	16	16	22	22	45	45	8	8	110	110	2.23	2.23	104	104	144	144	3.8	4	0.87
1	0	1	9	3	1	1	1	0	0	0	0	0	0	0	0	0	2	0	0	1	8.29167	87	26.7	26.7	7.9	7.9	157	157	27.2	27.2	18	23	15	17	30	35	6.5	6.7	110	110	4.26	4.52	186	303	141	144	3.7	3.9	4.6
0	0	1	6	12	4	5	3	0	0	0	0	0	4	0	0	0	0	0	0	0	3.875	87	32.3	32.3	9.8	9.8	191	191	17.2	17.2	28	28	15	15	100	100	7.5	7.5	116	116	3.41	3.41	85	85	155	155	3.9	3.9	2.71
1	0	3	11	3	1	1	1	0	0	0	0	0	5	0	0	0	0	0	0	0	1.41667	75	32	32	10.3	10.3	210	210	19.5	19.5	17	18	20	22	33	35	8.2	8.6	94	95	1.92	2.06	201	240	129	129	3.8	4.1	5.7
0	1	2	4	15	6	5	4	0	0	0	0	0	4	0	0	0	0	0	0	0	6.125	49	38	38	11.8	11.8	222	222	25.6	25.6	18	18	23	23	53	53	8.4	8.4	97	97	4.7	4.7	141	141	134	134	3.2	3.6	2.3
0	0	1	8	15	6	5	4	0	4	0	0	0	0	0	0	0	0	0	0	0	1.125	89	29.3	29.3	9.6	9.6	190	190	15.6	15.6	13	13	25	25	20	20	8.9	8.9	104	104	1.2	1.2	131	131	137	137	4.6	4.6	1.1
0	0	2	4	15	6	5	4	0	0	0	0	0	4	0	0	0	0	0	0	0	2.5	23	30.9	30.9	10	10	339	339	12	12	13	13	23	23	4	4	8.1	8.1	107	107	1	1	86	86	139	139	3.8	3.8	0.5
1	1	1	12	3	1	1	1	0	0	0	0	0	6	0	0	0	0	0	0	0	1.08333	82	32.8	32.8	10.6	10.6	6	6	0.5	0.5	16	16	17	17	35	35	7	7	112	112	1	1	112	112	139	139	5.7	5.7	3
0	1	3	9	8	2	5	1	0	0	0	0	0	4	0	0	0	0	0	0	0	3.70833	54	32.7	37.4	10.4	11.9	161	226	10.6	15.4	8	10	33	34	9	10	8.6	8.8	105	106	0.97	1.03	106	107	143	144	3.9	5.3	1.4
0	0	1	7	13	6	5	2	0	0	2	0	0	0	0	0	0	0	0	0	0	1.54167	53	33	33	10.5	10.5	226	226	10.4	10.4	13	13	29	29	27	27	7.5	7.5	102	102	1.74	1.74	204	204	140	140	3.9	3.9	1.7
0	0	1	4	14	6	5	3	0	0	0	0	0	6	0	0	0	0	0	0	0	4.66667	91	32.2	32.2	10.6	10.6	206	206	10.5	10.5	14	14	24	24	12	12	8.3	8.3	100	100	0.98	0.98	123	123	134	134	3.7	4.2	1.8
0	0	1	2	14	6	5	3	0	0	2	0	0	0	0	0	0	0	0	0	0	3.16667	78	28	31.8	8.5	9.4	315	315	9	9	9	9	34	34	18	18	9.3	9.3	103	103	1.3	1.3	193	193	142	142	3.7	3.7	1
0	1	1	7	7	1	4	2	0	0	0	0	0	5	0	0	0	0	0	0	0	16.9583	64	39.5	39.5	13	13	591	591	19.6	19.6	16	16	28	28	11	11	9.1	9.1	96	96	0.2	0.2	153	153	136	136	3.8	3.8	1
0	1	1	4	13	6	5	2	0	0	0	0	0	0	0	0	0	2	0	0	0	2.29167	55	22.9	22.9	7.5	7.5	262	262	11.2	11.2	12	13	23	24	22	33	7.9	8.1	104	107	0.9	1	115	138	136	139	3.8	4	0.7
0	1	1	2	15	6	5	4	0	0	0	0	0	6	0	0	0	0	0	0	0	2.91667	52	33	33	11	11	206	206	10.2	10.2	12	12	27	27	7	7	7.6	7.6	105	105	1.03	1.03	195	195	140	140	4	4	0.9
1	1	2	10	10	4	4	2	0	0	0	0	0	5	0	0	0	0	0	0	0	4.20833	56	30.1	34.1	9.9	11.3	173	234	11.8	29.5	19	24	16	17	21	24	6.9	7.1	113	116	1.29	1.64	60	110	148	150	3.2	3.7	7.1
0	0	2	9	15	6	5	4	0	0	0	0	0	5	0	0	0	0	0	0	1	1	49	28.2	30.9	7.7	8.4	138	159	11.7	11.9	17	17	24	24	70	70	8.9	8.9	101	101	5.88	5.88	91	91	138	138	4.3	4.3	1.7
0	1	2	7	9	6	2	1	0	0	0	0	0	3	0	0	0	0	0	0	1	1.29167	45	29.4	29.4	9.6	9.6	240	240	7.4	7.4	14	24	22	31	21	58	8.4	9	88	100	4.7	9.6	77	698	129	140	3.3	4.5	1.7
0	1	1	4	15	6	5	4	0	0	0	0	0	5	0	0	0	0	0	0	0	4	72	26.9	27	8.4	8.4	153	153	14	14	9	13	27	27	26	29	7.4	7.8	101	103	1.33	1.5	99	125	135	137	4	4.2	1.1
1	0	1	8	3	1	1	1	0	0	0	0	0	8	0	0	0	0	0	0	0	4.83333	65	29.2	29.2	9.9	9.9	68	68	1.2	1.2	16	16	20	20	13	13	7.5	7.5	103	103	1.11	1.11	99	99	136	136	3.2	3.6	0.7
0	0	1	4	8	1	3	4	0	0	0	0	0	2	0	0	0	0	0	0	0	2.95833	84	29	29	9	9	545	545	36.7	36.7	14	19	22	27	52	54	8.8	9	117	118	2.04	2.19	173	188	155	156	2.8	3.2	1.4
0	1	1	7	14	5	5	4	0	0	0	0	0	5	0	0	0	0	0	0	1	1.875	73	33.6	33.6	10.9	10.9	194	194	10.2	10.2	17	17	24	24	43	43	9.2	9.2	99	99	6.33	6.33	221	221	137	137	3.2	3.2	1.8
0	1	1	8	10	6	1	3	0	0	0	0	0	3	0	0	0	0	0	0	1	6	73	33.3	35.4	11.1	16.1	174	227	21.9	35.8	16	35	11	27	25	86	7.5	8.2	98	105	2.62	7.14	115	881	140	145	2.8	4.5	4.8
0	1	1	3	15	6	5	4	0	0	0	0	0	5	0	0	0	0	0	0	0	1.125	69	31.9	31.9	10.1	10.1	182	182	11.7	11.7	12	12	25	25	19	19	8.2	8.2	107	107	0.96	0.96	110	110	140	140	3.9	3.9	1.7
0	1	1	3	15	6	5	4	0	0	0	0	0	3	0	0	0	0	0	0	0	1.75	69	35.5	35.5	11.4	11.4	186	186	15.4	15.4	12	12	26	27	25	31	8.4	8.4	108	108	1.15	1.44	131	135	142	143	4.2	4.4	2.7
0	1	1	9	15	6	5	4	0	0	0	0	0	2	0	0	0	0	0	0	0	1.83333	51	28.1	33.8	10	12.1	42	42	2.6	2.6	11	11	24	24	17	17	7.1	7.1	109	109	1.02	1.02	107	107	140	140	3.7	3.7	1.1
0	1	1	3	15	6	5	4	0	0	0	0	0	4	0	0	0	0	0	0	0	2.91667	61	35.1	35.1	11.8	11.8	283	283	17.9	17.9	16	16	20	20	28	28	8	8	108	108	1.14	1.14	134	134	140	140	3.6	3.6	4.1
0	1	1	9	8	1	5	2	0	0	0	0	0	5	0	0	0	0	0	0	0	5.29167	66	30.4	31.2	9.5	9.8	55	126	5.4	6.1	11	12	28	29	46	49	8.4	8.7	110	111	2.71	2.76	192	264	144	147	4.6	4.6	0.6
1	1	2	17	3	1	1	1	0	0	0	0	0	3	0	0	0	0	0	0	0	10.5	64	26.9	32.5	9.2	11.2	96	147	15.9	23.4	16	19	19	23	55	58	8.3	8.5	106	107	3.62	4.37	135	215	141	142	3.4	4	4.1
0	1	1	6	14	6	5	3	0	0	2	0	0	0	0	0	0	0	0	0	0	4.66667	91	31.7	31.7	10.3	10.3	243	243	23.4	23.4	14	14	19	19	51	51	8	8	116	116	2.8	2.8	105	105	145	145	4.3	4.3	1
0	1	1	7	6	1	2	3	0	0	0	0	0	6	0	0	0	0	0	0	0	1.08333	83	35.7	35.7	11	11	245	245	14.9	14.9	13	13	26	26	62	62	8.8	8.8	118	118	1.28	1.28	102	102	153	153	3.4	3.6	1.5
0	1	1	2	15	6	5	4	0	0	0	0	0	7	0	0	0	0	0	0	0	2.125	88	30.3	30.3	10	10	186	186	22.8	22.8	11	11	27	27	38	38	8.2	8.2	106	106	1.83	1.83	395	395	139	139	4.7	4.7	0.8
0	1	1	2	9	1	4	4	0	0	0	0	0	0	0	0	0	0	0	0	0	6.16667	47	28.8	28.8	9.7	9.7	196	196	13.2	13.2	12	12	24	24	23	23	7.5	7.5	112	112	1.06	1.06	71	71	145	145	3.4	3.4	1.2
0	1	1	5	9	4	1	4	0	0	2	0	0	0	0	0	0	0	0	0	0	2.125	21	41.6	41.6	14.2	14.2	162	162	22.4	22.4	13	15	25	26	12	14	8	8.1	101	103	0.99	1.27	139	155	137	138	4	4.4	1.3
0	1	1	2	13	6	4	3	0	0	7	0	0	0	0	0	0	0	0	0	0	1.33333	49	42.8	43.3	14.1	14.3	335	349	10.8	12.7	10	13.5	25	27	14	18	8.3	8.7	99	100	0.58	1.27	232	406	134	133	5.1	5.6	0.5
0	1	1	4	15	6	5	4	0	0	6	0	0	0	0	0	0	0	0	0	0	13.9583	71	28.2	28.2	8.8	8.8	237	237	11.5	11.5	7	7	33	33	13	13	8	8	100	100	0.7	0.7	149	149	136	136	4.1	4.1	0.9
0	1	1	11	3	1	1	1	0	0	0	0	0	7	0	0	0	0	0	0	1	15.625	64	23.8	27.4	8.1	9.1	63	92	0.9	2	7	18	24	29	21	65	8.1	8.4	96	104	3.98	10.8	76	106	132	139	3.6	6.4	1.8
0	1	1	4	15	6	5	4	0	0	0	0	0	5	0	0	0	0	0	0	1	3.08333	63	31	31	9.8	9.8	335	335	10.5	10.5	7	7	36	36	38	38	9.3	9.3	98	98	1.38	1.38	129	129	137	137	3.4	4	2.8
0	1	1	7	15	6	5	4	0	0	2	0	0	0	0	0	0	0	0	0	0	2.625	77	32.9	34.8	10.5	10.9	162	162	12.8	12.8	9	9	35	35	47	47	9.1	9.1	97	97	2.85	2.85	166	166	137	137	4.3	4.3	1.1
0	1	1	5	15	6	5	4	0	0	0	0	0	4	0	0	0	0	0	0	0	3.5	76	31.8	31.8	10.2	10.2	397	397	15.7	15.7	13	13	25	25	33	33	8.4	8.4	104	104	2.04	2.18	157	157	137	137	5.1	5.1	1.5
0	1	1	6	10	1	5	4	0	0	0	0	0	5	0	0	0	0	0	0	0	5.91667	55	30.3	30.3	10.6	10.6	93	93	8.5	8.5	17	17	23	23	30	30	7.5	7.5	101	101	0.97	0.97	133	133	137	137	3.6	5.7	2.2
1	1	1	6	12	6	4	2	0	0	0	0	0	7	0	0	0	0	0	0	0	4.91667	86	37.7	37.7	12.3	12.3	360	360	10.8	10.8	13	13	25	25	43	43	8.3	8.3	99	99	1.82	1.82	122	122	133	133	3.8	3.8	1.4
1	1	1	11	3	1	1	1	0	0	0	0	0	5	0	0	0	0	0	0	0	1.91667	61	38	41	12.5	12.5	156	156	7	7	20	23	16	22	36	41	7.8	8.4	90	91	2.92	3.22	77	108	124	126	5	5.9	7.5
0	0	1	5	9	4	1	4	0	0	0	0	0	3	0	0	0	0	0	0	0	4.58333	59	30.4	35.2	10.4	12	126	143	3.36	5.2	15	15	20	20	60	60	6.7	6.7	104	104	1.6	1.6	95	95	136	136	3.1	3.1	0.4
0	0	4	11	8	4	1	3	0	1	0	0	0	0	0	0	0	0	0	0	0	3.04167	49	35.3	35.3	10.8	10.8	163	163	10.2	10.2	16	17	24	26	18	25	6.9	7.1	105	106	1.3	1.7	91	91	142	143	3.6	4.5	0.9
0	1	2	9	3	1	1	1	0	0	0	0	0	4	0	0	0	0	0	0	0	2.04167	56	25.8	25.8	7.5	7.5	158	158	34.8	34.8	17	19	18	23	21	25	7.6	8.5	108	111	2.34	2.89	131	160	145	145	3	3.3	7.7
0	1	1	12	7	1	5	1	0	0	0	0	0	5	0	0	0	0	0	0	0	4.75	29	34.1	36	11.2	11.5	129	132	6.3	7.3	9	18	22	25	9	18	7.8	8.2	113	118	0.76	1.02	152	222	144	154	3	3.6	2.8
0	1	1	2	15	6	5	4	0	0	5	0	0	0	0	0	0	0	0	0	0	2.66667	72	32.6	32.6	11.2	11.2	159	159	16.9	16.9	13	13	21	21	11	11	7.7	7.7	104	104	0.73	0.73	140	140	134	134	3.6	3.6	2.4
0	1	1	7	15	6	5	4	0	0	0	0	0	5	0	0	0	0	0	0	0	1.91667	76	42.4	42.4	13	13	184	184	34.3	34.3	11	11	30	30	38	38	9	9	102	102	1.98	1.98	109	109	137	137	5.5	5.5	1.2
0	0	1	5	13	6	5	2	0	0	5	0	0	0	0	0	0	0	0	0	0	8.125	91	26	28.4	8.4	9.4	178	178	10.3	10.3	13	13	22	22	49	49	7.3	7.3	115	115	0.7	0.7	126	126	145	145	4.6	4.6	1.6
0	0	1	11	10	5	1	4	0	0	0	0	0	5	0	0	0	0	0	0	0	1.625	74	34.8	41.2	11.3	13.5	114	185	5.2	15.1	6	12	28	29	14	17	8.2	8.9	97	103	0.8	0.82	94	130	133	135	3.4	3.7	1.3
0	0	1	12	7	4	1	2	0	0	0	0	0	3	0	0	0	0	0	0	0	2.20833	74	38.1	40.4	12.9	13.5	88	113	23.7	35.8	15	19	20	23	33	40	8.6	8.7	104	104	1.59	1.66	101	106	138	139	3.6	3.8	2.6
0	0	1	6	15	6	5	4	0	0	7	0	0	0	0	0	0	0	0	0	0	2	55	27.5	28.2	9.4	9.5	32	32	3.2	3.2	15	15	21	21	27	27	7.4	7.4	112	112	2.01	2.01	93	93	144	144	3.8	3.8	2.6
0	0	1	3	11	2	5	4	0	0	0	0	0	1	0	0	0	0	0	0	0	1.375	66	43.6	43.6	14	14	183	183	27	27	11	11	27	27	25	25	9	9	105	105	1.14	1.14	204	204	139	139	4.3	4.3	2.4
0	0	1	2	14	6	5	3	0	5	0	0	0	0	0	0	0	0	0	0	0	4.04167	86	25.6	25.6	7.8	7.8	273	273	10.9	10.9	9	9	28	28	38	38	7.7	7.7	110	110	1.62	1.62	77	77	142	142	5.3	5.3	0.4
0	0	1	2	15	6	5	4	0	0	0	0	0	2	0	0	0	0	0	0	0	4.375	85	27.5	29.7	9	9.8	342	363	21.2	27.4	15	17	15	16	14	15	6.9	7.1	108	109	0.95	0.97	105	105	137	137	3.2	3.8	2
0	1	1	6	6	3	1	2	0	0	0	0	0	6	0	0	0	0	0	0	0	23.75	22	36.5	36.5	12.1	12.1	164	164	9.4	9.4	11	11	21	21	19	19	7.6	7.6	121	121	1.08	1.08	193	193	149	149	3.6	3.6	1.5
0	1	1	9	11	5	5	1	0	0	0	0	0	7	0	0	0	0	0	0	0	3.25	46	42.4	42.4	14	14	163	163	3.6	3.6	12	12	27	27	17	17	7.3	7.3	110	110	1.09	1.09	208	208	144	144	5	5	2.5
0	1	1	6	14	5	5	4	0	0	0	0	0	4	0	0	0	0	0	0	0	6.95833	22	36.5	36.5	13.2	13.2	177	177	18.1	18.1	8	13	27	32	58	61	6.5	6.5	94	97	4.79	5.44	116	125	131	134	3.3	4.4	0.4
0	0	2	4	14	6	5	3	0	0	3	0	0	0	0	0	0	0	0	0	0	1.91667	65	32.1	32.1	9.3	9.3	239	239	11.4	11.4	8	8	35	35	15	15	8	8	106	106	0.98	0.98	236	236	144	144	4.7	4.7	1.9
1	1	1	15	14	6	5	3	0	0	0	0	0	3	0	0	0	0	0	0	0	1.20833	28	28.6	32.3	9.5	10.6	50	53	11.5	12.5	17	25	15	25	34	72	6.2	7.2	83	94	1.52	3.16	48	142	115	131	4.6	7.8	4.2
0	0	1	5	6	1	1	4	0	0	0	0	0	6	0	0	0	0	0	0	0	6.125	56	34.6	36.6	11	11.5	299	346	20.1	22.3	14	14	26	26	15	15	8.8	8.8	104	104	1.26	1.26	157	157	140	140	4.1	4.1	1.3
0	1	1	5	6	4	1	1	0	2	0	0	0	0	0	0	0	0	0	0	0	1	78	30.1	30.1	10.5	10.5	74	74	5	5	11	11	25	25	27	27	7.4	7.4	108	108	1.24	1.24	143	143	140	140	3.6	3.6	1.6
1	0	2	14	3	1	1	1	0	0	0	0	0	6	0	0	0	0	0	0	0	7.125	58	23.2	23.2	8.2	8.2	99	99	11.2	11.2	21	25	21	22	69	80	6	6.2	98	102	5.27	6.75	225	264	139	141	3.8	4.8	3.7
0	0	1	13	6	1	1	4	0	0	0	0	0	3	0	0	0	0	0	0	0	10.2083	51	24.4	24.4	8.1	8.1	123	123	30	30	26	26	12	12	42	42	8.2	8.2	103	103	2.59	2.59	97	97	138	138	3.1	3.3	6.3
0	0	1	3	14	6	5	3	0	0	0	0	0	5	0	0	0	0	0	0	0	1.125	61	35.4	35.7	11.8	12	171	175	10.5	16.3	13	13	26	26	13	13	8.7	8.7	105	105	0.73	0.73	88	88	140	140	3.6	3.6	0.9
0	0	1	2	11	3	5	3	0	3	0	0	0	0	0	0	0	0	0	0	0	2.04167	57	27.1	27.1	9	9	254	254	15.9	15.9	13	13	21	21	12	12	7.4	7.4	110	110	0.88	0.88	115	115	140	140	3.7	4	0.7
0	0	1	10	3	1	1	1	0	0	0	0	0	0	0	0	0	0	0	0	0	4.75	68	24.1	27.4	8	8.8	225	246	6.3	19.6	12	19	14	20	21	25	7.3	8	108	111	0.9	1.4	104	355	136	142	3.9	4.8	0.9
0	0	1	6	13	5	4	4	0	0	0	0	0	4	0	0	0	0	0	0	0	3.16667	68	26.1	27.9	8.7	9.2	192	226	16.5	21.4	17	20	23	25	32	35	7.9	8.1	101	102	3.02	3.07	122	144	140	140	3.8	3.9	1.4
0	0	1	9	10	6	3	1	0	0	0	0	0	5	0	0	0	0	0	0	1	3.70833	62	25.2	25.2	7.9	7.9	205	205	10	10	15	25	22	28	44	48	7.3	7.7	95	98	9.21	10.21	97	100	135	136	5.7	6.4	1.4
1	0	1	13	7	1	5	1	0	0	0	0	0	4	0	0	0	0	0	0	0	2.04167	76	31.4	38.8	8.6	10.9	77	77	13.8	13.8	21	30	12	16	44	58	7.2	7.5	112	125	2.2	3.1	253	333	146	157	4.6	6.9	6.4
0	0	1	10	3	1	1	1	0	0	0	0	0	0	0	0	0	5	0	0	0	3.20833	67	30.5	30.5	9.1	9.1	324	324	8.4	8.4	13	13	29	29	43	43	8.9	8.9	113	113	1.86	1.86	261	261	151	151	4.3	4.3	0.9
1	0	4	4	6	1	2	3	0	0	0	0	0	9	0	0	0	0	0	0	1	13.625	63	30.9	30.9	10.8	10.8	305	305	25.7	25.7	11	11	28	28	10	10	8.2	8.2	89	89	0.69	0.69	161	161	122	125	2.9	2.9	0.9
0	0	3	10	6	1	1	4	0	0	0	0	0	5	0	0	0	0	0	0	0	6.58333	20	24.3	30.2	7.6	9.5	76	100	5.9	6.4	17	17	15	15	9	9	6.4	6.4	115	115	1.1	1.1	76	76	143	143	4.3	4.3	1.5
0	1	1	4	14	6	5	3	0	3	0	0	0	0	0	0	0	0	0	0	0	3.95833	66	35.7	36.9	12.1	12.9	153	158	5.9	6.4	15	15	20	20	43	43	8	8	102	102	2.3	2.74	135	135	133	133	3.6	3.6	1.9
1	1	4	12	13	5	4	4	0	0	0	0	0	6	0	0	0	0	0	0	1	1.375	44	27	27	9.2	9.2	87	87	33.2	33.2	25	25	21	21	75	75	8.2	8.2	91	91	12.3	12.3	125	125	133	133	4.3	4.3	3.9
0	1	1	6	13	6	3	4	0	0	0	0	0	4	0	0	0	0	0	0	0	2.58333	84	33	33	10.4	10.4	347	347	16.3	16.3	13	13	29	29	40	40	8.5	8.5	100	100	2.24	2.24	185	185	139	139	3.4	3.7	1.2
0	1	1	8	15	6	5	4	0	0	0	0	0	7	0	0	0	0	0	0	0	2.25	42	43.8	43.8	14.1	14.1	172	172	7.4	7.4	11	11	30	30	9	9	8.2	8.2	106	106	0.8	0.8	103	103	143	143	3.8	3.8	1.3
0	0	1	4	15	6	5	4	0	0	0	0	0	7	0	0	0	0	0	0	0	1.58333	49	29.3	29.3	9.8	9.8	91	91	9.9	9.9	15	15	22	22	19	19	7.8	7.8	109	109	1.29	1.29	104	104	142	142	4	4	0.9
0	1	2	5	14	6	4	4	0	0	0	0	0	6	0	0	0	0	0	0	0	4.58333	70	33.4	33.4	11.2	11.2	134	134	13.7	13.7	14	14	25	25	61	61	8.1	8.1	97	97	2.84	2.84	133	133	131	131	4.7	4.7	1.2
1	0	1	5	3	1	1	1	0	0	6	0	0	0	0	0	0	0	0	0	0	4.45833	71	39	39	11.9	11.9	175	175	10.6	10.6	4	2	48	48	14	14	8.3	8.3	99	99	0.56	0.56	160	160	143	143	4.3	4.3	0.9
1	0	2	7	7	1	3	3	0	0	0	0	0	3	0	0	0	0	0	0	1	3.41667	54	29.3	30.7	9	9.5	286	314	31.3	31.9	20	20	25	25	86	101	9.3	9.6	96	101	4	4.3	234	395	138	143	3.1	3.4	1.2
0	0	2	6	12	3	5	4	0	0	0	0	0	2	0	0	0	0	0	0	1	1.79167	54	28.2	28.2	9.6	9.6	181	181	24.4	24.4	12	12	29	29	27	27	8.2	8.2	99	99	4	4	87	87	137	137	3.4	3.4	0.9
0	1	1	6	13	4	5	4	0	1	0	0	0	0	0	0	0	0	0	0	0	2.54167	69	26.1	26.7	7.6	7.9	245	245	13.4	13.4	15	15	25	25	85	85	7.6	7.6	104	104	3.3	3.3	174	174	139	139	5	5	0.9
0	1	1	12	6	1	1	4	0	0	0	0	0	3	0	0	0	0	0	0	0	20.75	48	34.4	35.7	11.7	12	42	46	23.4	25.2	9	12	22	24	11	11	6.9	7.3	112	115	0.5	0.56	112	135	143	145	3.3	3.4	1.7
1	1	1	12	3	1	1	1	0	0	0	0	0	3	0	0	0	0	0	0	0	4.16667	59	35.8	35.8	11.7	11.7	268	268	10.1	10.1	13	13	25	25	12	12	7.7	7.7	102	102	0.99	0.99	122	122	137	137	2.8	2.8	2
0	1	1	9	7	1	5	1	0	0	0	0	0	6	0	0	0	0	0	0	0	1.625	55	34.9	34.9	11.4	11.4	334	334	23.6	23.6	13	14	21	23	26	26	7.7	7.8	99	101	1.14	1.28	213	430	130	133	3.6	4	2.3
0	0	1	7	15	6	5	4	0	0	0	0	0	6	0	0	0	0	0	0	0	2.83333	67	26.2	26.2	7.8	7.8	730	730	43.5	43.5	7	7	37	37	20	20	8	8	100	100	0.54	0.54	81	81	140	140	4.2	4.2	1.6
0	0	1	3	10	6	1	3	0	0	0	0	0	4	0	0	0	0	0	0	0	1.75	69	30.5	30.5	9.4	9.4	177	177	11.4	11.4	14	14	21	21	38	38	9.2	9.2	105	105	1.14	1.14	126	126	136	136	4.2	4.2	0.9
0	0	1	5	15	6	5	4	0	0	2	0	0	0	0	0	0	0	0	0	0	1	70	37.6	37.6	12.5	12.5	256	256	7.9	7.9	14	14	30	30	10	10	9	9	92	92	0.62	0.62	182	182	131	131	4.7	4.7	1.8
0	0	1	4	3	1	1	1	0	0	0	0	0	7	0	0	0	0	0	0	0	2.45833	70	30	30	10	10	71	71	3.9	3.9	11	15	20	25	11	16	7.9	7.9	106	108	0.85	1.23	128	168	137	140	3.6	3.9	2.1
0	0	1	6	15	6	5	4	0	0	0	0	0	5	0	0	0	0	0	0	0	1.04167	77	37.2	37.2	12.5	12.5	82	82	5.3	5.3	13	13	26	26	14	14	7.7	7.7	109	109	0.79	0.79	104	104	145	145	3.4	3.4	0.6
0	0	1	4	14	5	5	4	0	0	3	0	0	0	0	0	0	0	0	0	0	1.25	77	24.5	24.5	7.8	7.8	161	161	13.6	13.6	5	5	29	29	15	15	7.9	7.9	107	107	0.89	0.89	93	93	138	138	3.4	3.4	0.8
0	1	2	3	11	5	4	2	0	0	0	0	0	0	0	0	0	4	0	0	0	2.5	71	27.9	27.9	9.2	9.2	274	274	21.7	21.7	14	14	20	20	34	34	7.8	7.8	113	113	1.34	1.34	130	130	144	144	3.2	3.2	1.7
0	1	1	6	9	1	5	3	0	0	0	0	0	7	0	0	0	0	0	0	0	9.58333	33	41.5	50.1	13.5	16	139	254	8.8	17.7	14	26	11	22	12	16	7.9	8.9	122	132	0.74	0.89	82	495	157	169	1.8	3.6	1
0	1	1	7	11	2	5	4	0	0	0	0	0	7	0	0	0	0	0	0	0	6.08333	34	34.9	36.5	10.8	11.5	210	355	25.1	29	13	15	19	19	17	19	7	7.1	114	116	0.51	0.56	137	221	145	145	2.9	3.3	1.4
0	0	1	5	15	6	5	4	0	0	0	0	0	6	0	0	0	0	0	0	0	5.29167	62	35.6	35.6	11.1	11.1	280	280	20.4	20.4	11	11	31	31	12	12	9.7	9.7	104	104	0.78	0.78	156	156	142	142	3.9	3.9	2.3
0	0	1	3	14	5	5	4	0	0	0	0	0	3	0	0	0	0	0	0	0	1.58333	25	32.6	36.5	10.9	12.2	290	316	12.8	20.5	11	19	17	21	10	55	8.1	8.4	99	109	0.73	4.81	81	118	130	136	3.9	4.5	0.8
0	0	1	9	12	3	5	4	0	0	0	0	0	3	0	0	0	0	0	0	0	1.66667	59	21.8	21.8	7.8	7.8	126	126	20.7	20.7	13	14	23	24	32	35	7.2	7.5	105	105	2.19	2.3	132	233	137	137	5.1	5.4	2.6
0	1	1	5	13	6	3	4	0	0	0	0	0	3	0	0	0	0	0	0	0	2.875	76	32.2	32.2	10.7	10.7	345	345	10.2	10.2	25	26	7	8	116	121	8.1	8.2	111	115	5.64	5.82	101	108	141	143	3.8	4.1	0.9
0	0	1	11	3	1	1	1	0	0	0	0	0	4	0	0	0	0	0	0	0	2.75	25	36.9	36.9	12.4	12.4	228	228	28.1	28.1	13	13	24	24	22	22	6.7	6.7	106	106	1.2	1.2	134	134	138	138	4.8	4.8	0.9
0	1	1	8	10	6	1	3	0	3	0	0	0	0	0	0	0	0	0	0	0	1.54167	91	42.8	42.8	13.7	13.7	49	49	9.9	9.9	17	18	20	20	85	88	6.9	7	108	108	2.93	2.98	144	162	141	142	3.8	4	3
0	0	3	6	15	6	5	4	0	0	1	0	0	0	0	0	0	0	0	0	0	2	52	32.9	32.9	10.7	10.7	145	145	3.8	3.8	16	18	13	14	67	77	7.1	7.6	113	117	4.87	5.2	76	80	139	142	5.3	5.4	1.5
0	1	1	3	14	6	4	4	0	0	4	0	0	0	0	0	0	0	0	0	0	1.125	79	34.7	35.9	10.9	11.1	439	563	12.5	23.9	15	19	20	22	28	36	9.1	9.4	105	106	1.5	1.55	222	403	138	139	4.9	5.2	4
0	1	1	15	7	2	4	1	0	1	0	0	0	0	0	0	0	0	0	0	0	8.25	50	22.2	34.8	7.8	11.8	42	86	17.2	31.9	8	16	17	22	34	35	6.9	7	115	116	1.19	1.26	147	177	142	144	3.9	4.1	2.9
0	1	1	4	14	6	4	4	0	0	0	0	0	3	0	0	0	0	0	0	0	2.125	65	32	37.1	10.2	12.4	99	116	1	1.3	7	10	28	28	30	35	7.6	8.3	97	100	1.1	1.2	100	137	129	130	4.7	5.6	1.7
0	1	1	4	8	1	3	4	0	0	1	0	0	0	0	0	0	0	0	0	0	13	62	31.2	31.2	10.3	10.3	260	260	14	14	13	13	28	28	35	35	9	9	105	105	1.32	1.32	122	122	143	143	3.4	3.4	1.2
0	1	1	7	14	6	5	3	0	2	0	0	0	0	0	0	0	0	0	0	1	2.95833	74	27	27	8.2	8.2	272	272	16	16	18	18	29	29	64	64	9.2	9.2	95	95	8.03	8.03	85	85	138	138	4.3	4.4	2
0	1	1	4	15	6	5	4	0	0	0	0	0	5	0	0	0	0	0	0	0	2.79167	78	27.2	29.8	8.1	9	216	254	1.6	3.28	7	8	42	43	19	24	8.8	8.9	94	95	1.19	1.47	107	224	139	142	4.3	4.3	0.8
0	1	1	5	14	5	5	4	0	0	0	0	0	4	0	0	0	0	0	0	0	4.04167	78	41.1	41.1	12.1	12.1	139	139	9.5	9.5	7	5	42	42	26	26	8.6	8.6	98	98	1.79	1.79	302	302	137	137	4.3	4.3	0.99
0	1	1	9	7	4	1	2	0	0	0	0	0	4	0	0	0	0	0	0	0	3.54167	87	49.8	49.8	16	16	470	470	18.6	18.6	18	18	23	23	64	64	9.1	9.1	100	100	2.61	2.61	102	102	136	136	4.7	4.7	3
1	1	1	12	15	6	5	4	0	0	0	0	0	5	0	0	0	0	0	0	0	5.79167	60	25.8	25.8	9.5	9.5	15	15	4.9	4.9	24	25	8	11	52	54	7.3	7.5	103	104	2.23	2.3	59	84	132	135	2.8	3.7	5.6
1	1	1	8	15	6	5	4	0	0	3	0	0	0	0	0	0	0	0	0	0	5.20833	78	33.1	33.1	10.7	10.7	219	219	16.1	16.1	15	17	24	25	70	77	9.2	9.6	101	103	3.72	3.83	116	149	135	138	5.7	5.9	1.9
0	1	1	2	15	6	5	4	0	0	0	0	0	4	0	0	0	0	0	0	0	1.41667	62	36.9	36.9	11.3	11.3	225	225	14.1	14.1	12	12	30	30	21	21	8.5	8.5	101	101	1.5	1.5	119	119	137	137	5.6	5.6	1.7
1	1	1	5	6	1	2	3	0	0	0	0	0	2	0	0	0	0	0	0	0	1.75	80	34.8	34.8	11	11	168	168	15.7	15.7	12	12	18	18	24	24	8	8	109	109	1.58	1.58	83	83	135	135	3.9	3.9	1.3
1	0	1	10	12	6	4	2	0	0	0	0	0	2	0	0	0	0	0	0	0	1.20833	69	30.5	36.9	9.9	12.2	285	369	4.9	21.4	16	19	20	22	17	29	8.3	8.8	100	106	1.1	1.5	118	126	137	141	3.7	4.3	2.7
0	1	1	2	15	6	5	4	0	0	3	0	0	0	0	0	0	0	0	0	0	2.54167	62	37.5	37.5	12.9	12.9	239	239	14.3	14.3	11	11	34	34	12	12	8.6	8.6	94	94	1.24	1.24	160	160	135	135	4	4	1.1
0	1	1	5	5	1	3	1	0	0	0	0	0	8	0	0	0	0	0	0	0	9.83333	61	31.3	31.3	9.5	9.5	203	203	8.1	8.1	7	7	33	33	30	30	9.4	9.4	111	111	0.68	0.68	282	282	147	147	3.4	3.5	0.8
0	1	2	4	15	6	5	4	0	0	0	0	0	2	0	0	0	0	0	0	0	3.375	45	32.6	32.6	10.9	10.9	166	166	11.9	11.9	17	17	21	22	53	56	8.4	8.6	100	100	4.16	4.44	111	114	134	134	4.3	4.8	0.5
0	0	4	2	14	5	5	4	0	4	0	0	0	0	0	0	0	0	0	0	0	1	40	30.6	30.6	10.5	10.5	107	107	22.4	22.4	15	15	18	18	10	10	6.9	6.9	113	113	0.7	0.7	206	206	142	142	3.9	3.9	4.5
0	0	4	5	14	6	5	3	0	0	0	0	0	6	0	0	0	0	0	0	0	1.375	55	19.7	19.7	6.3	6.3	338	338	18.7	18.7	15	15	25	25	42	42	8.2	8.2	100	100	5.79	5.79	85	85	136	136	3.9	3.9	0.7
0	1	1	3	15	6	5	4	0	3	0	0	0	0	0	0	0	0	0	0	0	1.125	76	28.7	28.7	9.5	9.5	216	216	10.4	10.4	16	16	18	18	36	36	7.4	7.4	106	106	1.56	1.56	124	124	136	136	4.2	4.2	0.6
0	1	4	2	15	6	5	4	0	0	0	0	0	5	0	0	0	0	0	0	0	1.875	61	30	30	9.9	9.9	184	184	17.7	17.7	14	14	25	25	16	16	8.4	8.4	101	101	1.13	1.13	109	109	136	136	3.6	3.6	1.1
0	1	1	5	14	6	5	3	0	0	0	0	0	7	0	0	0	0	0	0	0	4.58333	70	25.5	25.5	7.8	7.8	260	260	12.8	12.8	12	12	29	29	48	48	7.8	7.8	105	105	2.05	2.05	129	129	140	140	5.8	5.8	2.3
0	1	1	5	15	6	5	4	0	0	0	0	0	6	0	0	0	0	0	0	0	1.25	70	28.5	28.5	8.8	8.8	153	153	17.4	17.4	15	15	21	21	39	39	8.4	8.4	110	110	1.1	1.1	138	138	141	141	4.5	4.5	0.9
0	0	1	4	11	2	5	4	0	0	0	0	0	8	0	0	0	0	0	0	0	1.91667	73	21.3	21.3	7.2	7.2	22	22	0.4	0.4	14	14	25	25	17	17	7.7	7.7	103	103	1	1	104	104	138	138	3.5	3.5	2
0	0	1	3	15	6	5	4	0	0	5	0	0	0	0	0	0	0	0	0	0	1.08333	82	29.7	31.8	8.4	9.1	148	187	26.1	29.6	11	11	28	30	24	26	8	8.1	106	110	1.2	1.6	76	121	143	144	4.3	4.7	2
0	0	1	9	8	1	3	4	0	0	0	0	0	2	0	0	0	0	0	0	0	3.58333	60	31.8	38.5	10.6	13.8	153	241	6.9	20	15	23	8	17	39	51	6.9	7.8	101	112	1.4	1.7	206	825	127	143	2.8	4	1.2
0	1	4	12	8	2	5	1	0	0	0	0	0	6	0	0	0	0	0	0	0	2.75	32	33.8	38.5	11.1	12.6	72	74	17.9	18.1	15	16	19	20	13	18	6.8	6.9	111	112	1.38	1.54	131	232	141	143	3.9	4.6	3
0	1	1	4	15	6	5	4	0	0	0	0	0	3	0	0	0	0	0	0	1	3.83333	56	28.8	28.8	9	9	171	171	27.1	27.1	15	15	28	28	51	51	7.7	7.7	104	104	3.24	3.24	279	279	143	143	3.7	3.7	1.2
0	1	1	2	13	6	4	3	0	0	0	0	0	6	0	0	0	0	0	0	0	3.45833	44	34.9	39.2	11.7	13.4	211	225	4.1	4.3	12	14	23	26	14	14	8	8	98	99	1.2	1.21	68	79	131	133	3.6	3.9	0.6
0	1	1	6	13	5	4	4	0	0	4	0	0	0	0	0	0	0	0	0	0	1.08333	45	29.2	29.2	9.7	9.7	103	103	4.2	4.2	11	11	27	27	18	18	7.9	7.9	104	104	1.03	1.03	90	90	138	138	4	4	1.3
0	1	1	12	3	1	1	1	0	0	0	0	0	0	0	0	0	0	0	0	0	22.5	73	33.8	41.6	11.9	14.6	127	154	6.9	9.2	16	18	21	27	38	41	5.8	7.3	97	101	3.97	5.74	113	158	135	137	3.4	3.8	1.4
0	0	1	3	15	6	5	4	0	5	0	0	0	0	0	0	0	0	0	0	0	1.83333	48	31.1	31.1	10.3	10.3	142	142	27.7	27.7	14	14	19	19	10	10	6	6	114	114	0.86	0.86	134	134	143	143	3.7	3.8	1.1
0	1	1	2	14	6	5	3	0	0	0	0	0	5	0	0	0	0	0	0	0	1.95833	64	27.1	28.6	8.9	9.3	210	210	4.1	4.1	14	16	21	23	18	22	7.7	7.7	103	108	1.27	1.52	79	117	136	141	3.7	4.1	0.7
0	1	1	6	14	6	5	3	0	0	0	3	0	0	0	0	0	0	0	0	0	2.25	87	42.1	42.1	13.7	13.7	149	149	24.3	24.3	18	18	20	18	99	103	8	7.8	109	109	3	2.94	188	152	143	144	4.1	4.1	2.2
0	1	1	2	15	6	5	4	0	0	0	0	0	5	0	0	0	0	0	0	0	1.79167	34	26	23.5	8.1	7.2	233	220	11.8	10.4	13	13	26	26	15	15	7.8	7.8	105	105	1.19	1.19	111	111	140	140	4.4	4.4	0.7
0	1	1	8	15	6	5	4	0	0	3	0	0	0	0	0	0	0	0	0	0	7.625	51	40.1	40.1	12.6	12.6	150	150	4.8	4.8	15	18	22	23	66	71	7.5	7.5	104	110	3.5	4.5	95	136	139	142	5.3	5.9	1.5
0	1	1	4	15	6	5	4	0	0	0	0	0	5	0	0	0	0	0	0	0	3.41667	61	21.2	21.2	7.4	7.4	81	81	1.6	1.6	10	10	25	25	15	15	7.5	7.5	103	103	0.88	0.88	111	111	134	134	3.8	3.8	1.8
0	1	2	5	15	6	5	4	0	0	0	4	0	0	0	0	0	0	0	0	0	1.125	54	31.5	33.8	10.8	11.5	268	271	11.2	11.3	13	13	22	22	52	52	7.5	7.5	106	106	3.4	3.4	82	82	136	136	4.7	4.7	0.6
0	1	1	9	3	1	1	1	0	2	0	0	0	0	0	0	0	0	0	0	0	3.5	84	35.4	37.2	11.6	11.8	97	102	11.3	11.8	14	15	24	25	48	51	7.4	7.6	102	103	3.36	3.39	107	152	136	137	4.7	5	1
0	1	1	3	14	6	4	4	0	0	0	0	0	1	0	0	0	0	0	0	1	2	79	36.4	35.4	12	11.5	334	294	20.4	17.2	13	14	27	28	39	40	9.2	9.2	83	83	2.03	2.02	286	257	125	127	4.7	4.5	6.7
0	1	1	7	14	6	5	3	0	2	0	0	0	0	0	0	0	0	0	0	0	1.95833	86	45.6	45.6	14.7	14.7	170	170	16.2	16.2	10	14	31	35	45	49	7.9	9.6	101	107	2.7	2.8	113	160	144	149	3.4	4	1.3
0	1	1	4	15	6	5	4	0	0	0	0	0	3	0	0	0	0	0	0	0	2.16667	79	40.4	40.4	13	13	190	190	22.2	22.2	7	7	29	29	23	23	8.8	8.8	101	101	1.25	1.25	133	133	133	133	4	4.2	1.2
0	1	1	6	15	6	5	4	0	0	0	0	0	6	0	0	0	0	0	0	0	1.125	77	32	32	11.3	11.3	154	154	16.9	16.9	9	11	24	26	24	25	7.7	7.8	105	107	1.14	1.35	177	275	136	138	2.7	4.3	1.5
0	1	1	3	15	6	5	4	0	4	0	0	0	0	0	0	0	0	0	0	0	2.91667	24	44.3	44.3	14.6	14.6	210	210	18.7	18.7	13.8	13	24	25	21	19	8.9	8.8	109	107	1.4	1.23	140	139	143	143	4.3	4.4	4
1	0	2	5	7	2	1	4	0	0	0	0	0	4	0	0	0	0	0	0	0	1.25	45	35.4	35.4	11.6	11.6	382	382	16.1	16.1	16	16	18	18	3	3	6.6	6.6	118	118	0.7	0.7	162	162	148	148	4.1	4.1	1
0	0	1	5	3	1	1	1	0	0	0	0	0	8	0	0	0	0	0	0	0	5.625	40	32.6	32.6	10.8	10.8	308	308	24.7	24.7	14	14	24	24	13	13	8	8	104	104	0.7	0.7	179	179	137	137	4.6	4.6	1.3
0	1	3	14	3	1	1	1	0	6	0	0	0	0	0	0	0	0	0	0	0	3.66667	26	44.2	44.2	14.1	14.1	109	109	23.5	23.5	19	25	17	22	33	55	6.4	7.2	106	111	4.3	5.8	142	194	142	146	4.7	5.6	4.8
0	0	3	11	3	1	1	1	0	0	2	0	0	0	0	0	0	0	0	0	0	11.625	55	24.3	24.3	7.7	7.7	28	28	7.5	7.5	14	14	23	23	16	16	8.4	8.4	103	103	1.43	1.43	184	184	136	136	4.3	4.3	2.4
0	0	1	3	15	6	5	4	0	0	0	0	0	4	0	0	0	0	0	0	0	1.20833	73	33.8	33.8	10.9	10.9	494	494	24.1	24.1	11	14	24	26	17	19	8.9	9.2	100	107	0.94	1.06	116	161	133	137	4.3	4.9	0.9
1	1	3	5	3	1	1	1	0	0	0	0	0	7	0	0	0	0	0	0	0	5.25	74	23.4	23.4	7.8	7.8	153	153	6.9	6.9	18	22	15	20	81	85	7.1	7.2	100	102	5.33	5.9	167	275	133	133	4.8	5.8	2.2
0	0	1	6	11	3	4	4	0	3	0	0	0	0	0	0	0	0	0	0	0	3.33333	91	41.7	41.7	12.2	12.2	202	202	16.4	16.4	10	10	28	28	50	50	7.9	7.9	126	126	1.62	1.62	137	137	160	160	3.5	3.5	0.9
0	0	1	7	3	1	1	1	0	0	0	0	0	4	0	0	0	0	0	0	0	2	60	39	39	12.3	12.3	191	191	10.4	10.4	11	11	30	30	17	17	8	8	106	106	0.84	0.84	176	176	143	143	4	4	1.4
1	0	2	7	3	1	1	1	0	0	0	0	0	9	0	0	0	0	0	0	0	2.91667	68	33.4	34	10.7	10.9	421	479	34.7	35	12	15	21	22	42	47	8.2	8.3	103	112	2.39	2.4	205	846	134	142	3.6	5.1	2.1
0	1	1	2	15	6	5	4	0	0	0	0	0	2	0	0	0	0	0	0	0	1.83333	57	45.1	45.1	15.2	15.2	157	157	14.8	14.8	11	11	31	31	30	30	9.8	9.8	106	106	1.68	1.68	120	120	144	144	4.3	4.3	1.5
0	0	3	12	3	1	1	1	0	0	0	0	0	5	0	0	0	0	0	0	0	5.04167	19	30.7	30.7	9.1	9.1	65	65	12.7	12.7	18	22	18	22	17	19	8	9.5	109	123	2.04	2.12	132	402	146	160	3.4	5.3	6
0	0	1	2	15	6	5	4	0	3	0	0	0	0	0	0	0	0	0	0	0	8.41667	91	22.9	22.9	7.2	7.2	253	253	7.9	7.9	9	9	31	31	20	20	8.1	8.1	100	100	1.4	1.4	157	157	137	137	3.3	3.3	0.8
0	1	1	5	13	6	4	3	0	0	0	0	0	4	0	0	0	0	0	0	0	1.83333	80	30.6	30.6	10.1	10.1	110	110	31.4	31.4	18	18	18	18	32	32	7.6	7.6	108	108	2.07	2.07	91	91	140	140	4.2	4.2	1.9
0	1	1	6	15	6	5	4	0	0	0	0	0	6	0	0	0	0	0	0	0	1.5	61	13.2	19	4.4	6.1	31	35	0.5	0.5	12	12	21	21	32	32	7.3	7.3	105	105	1.29	1.29	163	163	134	134	3.3	3.6	0.8
1	1	1	14	3	1	1	1	0	0	0	0	0	7	0	0	0	0	0	0	0	2.45833	46	36.1	36.1	11.4	11.4	126	126	12.2	12.2	15	18	20	23	16	21	7.4	8	101	105	0.9	1.3	58	138	136	139	4	4.2	8.4
0	0	1	2	15	6	5	4	0	0	0	0	0	4	0	0	0	0	0	0	0	1.70833	80	25	26.8	8.1	8.5	151	172	8.4	9.3	11	14	23	26	32	36	8	8.1	102	106	1.45	1.61	84	102	137	139	3.2	3.8	1.1
0	0	3	5	11	6	2	3	0	1	0	0	0	0	0	0	0	0	0	0	1	2.08333	57	29	29	9.2	9.2	144	144	5.9	5.9	11	11	31	31	10	10	8.3	8.3	99	99	2.5	2.5	84	84	138	138	3.2	3.2	0.8
0	0	3	12	9	5	2	2	0	0	0	0	0	2	0	0	0	0	0	0	1	3.75	57	33.5	33.5	10.7	10.7	138	138	7.6	7.6	15	15	25	25	35	35	8.7	8.7	87	87	7.32	7.32	89	89	123	123	4.4	4.4	0.6
0	1	1	14	3	1	1	1	0	0	0	0	0	4	0	0	0	0	0	0	0	16	69	30.5	33	10.2	10.5	113	146	15.7	19.4	19	22	20	24	51	66	6.9	7.6	102	102	4.88	6.04	127	217	138	141	3.9	5.5	2.8
0	1	1	4	13	6	5	2	0	0	2	0	0	0	0	0	0	0	0	0	0	4	85	31.2	33.1	10.2	11.1	176	197	11.8	14.4	14	21	21	23	34	50	8.1	9	107	116	1.09	1.65	79	140	144	150	3.4	3.8	1.7
0	1	1	6	15	6	5	4	2	0	0	0	0	1	0	0	0	0	0	0	0	2.75	61	33.9	34.1	10.7	10.8	187	195	26.5	28.4	9	11	23	24	10	11	8.4	8.4	106	106	0.48	0.5	148	148	139	140	4	4	2.3
0	1	1	6	15	6	5	4	0	0	0	0	0	2	0	0	0	0	0	0	0	1.83333	51	33.7	33.7	11.2	11.2	125	125	7.2	7.2	11	11	22	22	16	16	8.3	8.3	103	103	0.75	0.75	94	94	136	136	4.1	4.1	1.5
0	1	1	6	15	6	5	4	0	0	0	0	0	3	0	0	0	0	0	0	0	1.08333	52	30.8	31	10.1	10.3	69	73	10	10.3	12	13	16	21	44	47	7.3	7.4	111	112	3.6	3.6	81	82	141	144	4.5	4.6	1.3
1	1	1	18	8	4	1	3	3	0	0	0	0	2	0	0	0	0	0	0	0	1.33333	64	25.6	30.4	8.6	10	20	54	0.1	3.7	13	17	16	19	33	35	6	6.6	95	104	1.4	2	97	379	131	135	2.9	3.7	5.5
0	1	1	7	14	6	4	4	1	0	0	0	0	2	0	0	0	0	0	0	0	1.16667	57	22.1	24.7	7.9	8.6	119	134	7.2	8.2	14	15	22	25	13	14	7	7.3	95	97	1	1.1	95	154	134	134	3.4	3.7	2
0	1	1	12	12	6	3	3	3	0	0	0	0	1	0	0	0	0	0	0	0	1.79167	61	48.7	49.8	16.4	16.8	86	96	14.6	16.4	9	10	16	18	22	30	7.5	7.8	107	109	1.3	1.4	107	152	134	135	4.9	5	1.5
0	0	4	2	15	6	5	4	0	0	0	0	0	0	0	0	0	0	0	0	0	2	52	29.6	28.5	9.6	9.2	184	181	1	0.26	13	13	24	24	6	6	9.2	9.2	98	98	0.7	0.7	83	83	135	135	3.7	3.7	1.3
0	0	1	4	15	6	5	4	0	0	0	0	0	2	0	0	0	0	0	0	0	1.83333	54	34	34.3	11.6	11.7	402	411	17.1	27.7	10	10	27	27	15	19	8.3	8.6	96	97	0.92	1.22	134	135	133	134	3.9	4	0.6
0	1	1	4	15	6	5	4	0	0	0	0	0	0	0	0	0	0	0	0	0	1.875	85	41	41	13.7	13.7	175	177	15.4	15.4	10	10	25	25	31	31	8.9	8.9	100	100	1.48	1.48	182	182	135	135	4.5	4.5	1.6
0	0	1	2	14	6	5	3	0	0	0	0	0	0	0	0	0	0	0	0	0	1.25	81	28.3	28.3	9.1	9.1	340	340	12.3	12.3	7	7	21	21	11	11	7.1	7.1	101	101	0.7	0.7	100	100	129	129	4.8	4.8	1.2
0	1	1	11	3	1	1	1	4	0	0	0	0	1	0	0	0	0	0	0	0	13.125	67	39.3	39.3	13.5	13.5	141	141	28.3	28.3	15	19	14	18	16	17	6.1	6.9	91	95	0.4	0.4	233	279	124	128	3.1	4.3	2.9
0	1	1	6	15	6	5	4	0	0	0	0	0	0	0	0	0	0	0	0	0	3	69	23.5	23.5	7.8	7.8	108	108	0.7	0.7	15	15	18	18	56	56	8.8	8.8	100	100	2.1	2.1	89	89	133	133	3.8	3.8	2.2
0	0	1	8	10	5	3	2	0	0	0	0	0	0	0	0	0	0	0	0	0	5.83333	58	21.4	22.4	7.3	7.8	137	151	6	8.6	12	15	23	27	19	22	8.3	8.8	90	96	0.5	0.6	114	117	129	134	4	5.2	1.1
0	1	1	5	13	5	4	4	0	0	0	0	0	1	0	0	0	0	0	0	0	1.91667	82	39	37.1	13	12.4	142	142	21.7	20	15	15	24	24	42	42	8.6	8.6	99	99	1.84	1.84	316	316	138	138	5.5	5.5	1.4
0	1	1	12	13	6	4	3	2	0	0	0	0	0	0	0	0	0	0	0	1	3	80	33.7	33.7	10.8	10.8	122	122	21	21	20	21	22	27	32	49	8.8	9.3	97	98	5.7	8.2	111	113	138	140	4.5	6.4	1.6
0	1	1	9	14	6	5	3	3	0	0	0	0	2	0	0	0	0	0	0	0	3.08333	73	22.1	22.1	7.6	7.6	16	16	15.3	15.3	11	11	21	21	19	19	7.5	7.5	104	104	0.7	0.7	130	130	136	136	3.2	3.5	0.8
0	0	1	14	9	4	3	2	1	0	0	0	0	1	0	0	0	0	0	0	0	1.91667	80	31.2	36	10.5	12.3	170	170	9.6	9.6	16	16	24	24	86	86	8.9	8.9	100	100	2.6	2.6	115	115	139	140	3.6	3.9	3.3
0	0	1	6	15	6	5	4	0	0	0	0	0	1	0	0	0	0	0	0	0	3.83333	80	30.2	30.2	9.5	9.5	44	44	1.19	1.19	12	12	28	28	16	16	7.1	7.1	95	95	0.67	0.67	120	120	135	135	3.4	4.3	1
0	0	1	5	15	6	5	4	0	0	1	0	0	0	0	0	0	0	0	0	0	1.04167	87	31.8	31.8	9.8	9.8	147	147	13.1	13.1	9.9	9.9	23	26	31	34	7.4	7.8	105	107	1.09	1.2	92	146	137	138	3	4.4	0.5
0	1	1	3	15	6	5	4	0	0	0	0	0	3	0	0	0	0	0	0	0	1.625	69	29.8	29.8	10.8	10.8	189	189	11.7	11.7	8	9	24	24	38	38	8.6	9.2	104	107	1.56	1.72	144	177	140	139	4	4.1	1.2
1	1	1	5	15	6	5	4	0	0	0	0	0	1	0	0	0	0	0	0	0	2.70833	86	27.2	27.2	9.2	9.2	273	273	27	27	12	12	21	21	15	15	7.6	7.6	91	91	1.18	1.18	106	106	124	124	3.8	3.8	3.5
0	0	2	7	14	6	4	4	1	0	0	0	0	1	0	0	0	0	0	0	0	1.125	81	40.4	40.4	14.7	14.7	264	264	47.3	47.3	12.1	13.3	18	20	41	42	6.7	7.4	94	100	1.91	2.07	160	163	123	129	3.1	3.3	1.3
0	0	4	20	10	5	3	2	1	0	0	0	0	2	0	0	0	0	0	0	0	4.91667	50	29.7	34.4	9.9	11.3	14	43	11.3	12.6	16	21	13	22	12	20	7.4	7.9	97	105	1.5	2.5	64	169	136	139	4	4.5	6.2
0	0	1	4	15	6	5	4	0	0	0	0	0	1	0	0	0	0	0	0	0	1.20833	88	34.2	34.2	10.9	10.9	141	141	18.1	18.1	10	10	22	22	32	32	8	8	106	106	1	1	104	104	138	138	3.4	3.4	2
0	1	1	5	12	5	4	3	0	0	0	0	0	1	0	0	0	0	0	0	0	2.625	62	44.3	44.3	14.6	14.6	184	184	3.28	3.28	13	15	16	22	32	36	8.1	8.9	102	109	1.42	1.84	123	144	133	142	5.1	6	1.2
0	0	4	5	14	6	5	3	2	0	0	0	0	0	0	0	0	0	0	0	0	1.125	75	38.4	39.2	12.4	12.9	117	136	15.3	27.4	12	14	20	23	29	31	7.1	7.4	100	104	1.6	1.8	88	202	134	139	4.1	4.1	1.6
0	1	1	5	9	5	2	2	0	0	0	0	0	0	0	0	0	0	0	0	1	17.0833	73	32.4	37	10.2	11.7	63	69	11.18	12.5	9	9	38	38	21	21	7.9	7.9	81	81	1	1	241	241	128	128	3.5	3.9	1.3
0	1	1	8	5	1	3	1	0	0	0	0	0	2	0	0	0	0	0	0	0	3.04167	65	33.1	44	11.9	15	159	159	16	16	18	20	19	26	101	106	7.4	7.6	92	94	4.2	5.6	165	249	131	137	3.1	4.7	1
0	1	1	3	15	6	5	4	0	0	0	0	0	1	0	0	0	0	0	0	0	2.33333	74	36.1	36.1	12.3	12.3	199	199	10.6	10.6	13.6	15.6	19	20	46	58	7.9	8	107	107	0.6	1.3	100	100	137	136	4.5	4.7	3.4
0	0	1	5	12	5	4	3	0	0	0	0	0	0	0	0	0	0	0	0	0	1.125	82	36.2	36.2	12	12	242	242	20.78	20.78	11	17	18	23	17	25	8.2	8.5	78	81	0.79	1.2	61	196	112	115	5.9	6.7	1.6
0	1	1	5	14	6	5	3	0	0	0	0	0	1	0	0	0	0	0	0	0	3.75	70	46.1	46.1	15.3	15.3	133	133	16.1	16.1	8	8	20	20	28	28	7.9	7.9	106	106	1.27	1.27	124	124	134	134	3.8	3.8	1.6
0	1	1	10	15	6	5	4	1	0	0	0	0	2	0	0	0	0	0	0	1	4.33333	89	27.8	29.7	9.5	10.1	160	231	17.2	21.8	16	17	19	21	54	63	6.9	7.3	98	101	7.3	8.1	131	191	135	137	4.2	4.9	2.7
0	0	1	8	13	6	4	3	0	0	0	0	0	1	0	0	0	0	0	0	0	2.875	74	24.7	24.7	7.9	7.9	79	79	0.5	0.5	11	11	20	20	29	29	8.3	8.3	110	110	0.9	0.9	110	110	141	141	3.7	3.7	1.2
0	1	1	8	14	6	5	3	0	0	0	0	0	0	0	0	0	0	0	0	0	1.04167	85	37.8	37.8	12.1	12.1	214	214	9.7	9.7	16	18	20	21	42	43	8.7	8.8	98	100	2.2	2.4	85	117	135	138	4.2	4.3	1.9
0	1	1	3	14	6	4	4	0	0	0	0	0	0	0	0	0	0	0	0	0	2.58333	49	29.2	29.6	10.4	10.4	39	89	1.1	3.6	15	16	17	25	22	37	7	7.9	94	100	2.07	4.02	151	173	133	137	4.1	4.2	2.3
0	1	1	9	6	4	1	1	0	0	0	0	0	2	0	0	0	0	0	0	0	3.08333	67	29.8	29.8	9.7	9.7	228	228	5.7	5.7	10	10	29	29	11	11	8.6	8.6	102	102	1.3	1.3	209	209	141	141	3.1	3.5	1
0	1	1	6	14	6	4	4	0	0	0	0	0	0	0	0	0	0	0	0	0	2.125	74	24.1	24.1	8.1	8.1	172	172	22.8	22.8	14	14	25	25	28	28	8.3	8.3	100	100	2	2	136	136	139	139	3.9	3.9	1.7
0	1	1	3	7	4	1	2	3	1	0	0	0	0	0	0	0	0	0	0	0	7.41667	83	30.9	30.9	10.2	10.2	125	125	3.9	3.9	10.1	10.1	21	21	13	13	9.3	9.3	111	111	1.04	1.04	84	84	138	138	4.1	4.1	0.8
0	1	1	6	15	6	5	4	3	0	0	0	0	0	0	0	0	0	0	0	0	1.29167	77	41.1	41.1	13.5	13.5	148	148	15.5	15.5	17	22	13	18	50	51	8.3	8.4	100	103	2.3	2.5	147	203	135	138	4.6	5.1	2
0	1	1	2	15	6	5	4	1	2	0	0	0	0	0	0	0	0	0	0	0	1.75	68	32.3	32.3	10.7	12.5	207	207	21.3	21.3	11	11	22	22	9	9	7.6	7.6	104	104	0.6	0.6	164	164	132	132	3.4	3.4	1
0	1	1	4	14	6	4	4	0	0	0	0	0	1	0	0	0	0	0	0	0	11.0833	73	42	42	14.1	14.1	201	201	18.1	18.1	14	14	26	26	49	49	8.6	8.6	95	95	1.75	1.75	248	248	135	135	3.7	3.7	2.8
0	0	1	6	14	6	5	3	4	0	0	0	0	3	0	0	0	0	0	0	0	5.70833	75	19.2	19.2	7.1	10	117	117	14.3	14.3	13	13	19	19	48	48	7.6	7.6	97	97	1.8	1.8	242	242	129	129	3.6	3.6	5.6
0	1	1	4	12	6	2	4	0	0	0	0	0	3	0	0	0	0	0	0	0	1.04167	39	42.3	45.6	14.2	15.3	258	266	16.3	18.5	10	10	21	21	25	25	9.7	9.7	115	115	1.7	1.7	90	90	146	146	3.8	3.8	0.8
0	0	1	9	14	6	5	3	0	0	0	0	0	0	0	0	0	0	0	0	0	2.16667	69	29.8	29.8	10.1	10.1	187	187	10.7	10.7	11	11	19	19	14	14	7.9	7.9	110	110	1.2	1.2	90	90	140	140	3.5	3.5	0.7
0	0	1	4	15	6	5	4	1	0	0	0	0	0	0	0	0	0	0	0	0	2.04167	70	35.7	35.7	12.2	12.2	225	225	9.5	9.5	10	17	20	22	20	37	7.8	8.5	87	103	1.05	1.29	212	444	124	133	3.7	4.4	2.1
0	1	1	7	8	4	3	1	0	0	0	0	0	0	0	0	0	0	0	0	0	1.04167	57	33.1	39	11.4	13.2	276	276	9.6	9.6	13	13	23	23	19	19	8.1	8.1	111	111	0.9	0.9	203	203	147	147	4.4	4.5	1.3
0	1	1	4	14	6	4	4	2	0	0	0	0	1	0	0	0	0	0	0	0	1	76	31.5	32.5	10.3	10.6	139	93	3.5	2.3	14.3	14.1	26	26	29	25	8.4	8.3	111	109	1.23	1.2	110	98	145	146	4.2	3.9	2.3
1	0	1	15	9	5	3	1	3	0	0	0	0	1	0	0	0	0	0	0	0	1.54167	80	25	35.6	7.5	10.6	67	81	50.8	75	10	10	25	25	51	51	7.5	7.5	103	103	2.8	2.8	115	115	137	138	4.4	4.8	1.5
0	0	1	4	14	6	4	4	0	0	0	0	0	0	0	0	0	0	0	0	0	3.45833	32	27.6	27.6	9.7	9.7	63	63	7.9	7.9	19	25	17	18	11	15	7.4	7.8	87	96	0.6	0.6	96	97	129	133	3.7	4	0.7
0	0	1	2	14	6	4	4	0	0	0	0	0	0	0	0	0	0	0	0	0	1.91667	82	40.7	40.7	12.8	12.8	172	172	13.4	13.4	7	7	28	28	25	25	8.3	8.3	104	104	1	1	134	134	139	139	4.4	4.4	1
0	0	1	4	15	6	5	4	0	0	0	0	0	0	0	0	0	0	0	0	0	2.125	57	32.5	32.5	10.7	10.7	376	376	16.86	16.86	14	17	13	18	15	22	7.4	7.8	95	100	0.93	1.37	193	400	125	132	4.2	6.1	1.6
1	1	1	15	15	6	5	4	7	2	0	0	0	0	0	0	0	0	0	0	0	1.16667	79	33.5	34.1	11.1	11.3	8	11	0.1	0.1	18.5	19.7	13	17	70	81	5.8	6.1	111	117	2	2.24	145	281	139	147	4.5	4.9	3.1
0	1	1	6	14	6	5	3	2	0	0	0	0	1	0	0	0	0	0	0	0	2.33333	40	18.6	21.8	6.3	7.2	288	310	14	16.3	17	17	19	19	113	113	8.2	8.2	98	98	3.4	3.4	156	156	134	134	3.7	3.7	1.1
0	1	4	11	7	5	1	1	3	0	0	0	0	2	0	0	0	0	0	0	0	1.75	86	26	27	8.7	9.4	93	96	14.2	15.7	6	7	16	16	32	31	8	8.8	111	112	0.76	0.8	103	151	138	138	3.6	3.6	9.7
1	1	1	5	14	6	5	3	2	0	0	0	0	1	0	0	0	0	0	0	0	2.54167	91	27.3	29.8	9.1	9.8	242	269	7.2	7.4	11	14	21	23	38	45	7.8	8.3	99	105	1.1	1.5	120	127	136	137	4.5	4.8	1.6
0	1	1	9	13	6	4	3	0	0	0	0	0	1	0	0	0	0	0	0	1	1.54167	65	27.7	27.7	9.3	9.3	117	117	7.5	7.5	17	17	29	29	43	43	9	9	88	88	6.8	6.8	224	224	134	134	4.3	4.4	1.7
0	1	1	11	7	5	1	1	0	0	0	0	0	3	0	0	0	0	0	0	0	5.25	27	24	31	8.2	10.5	81	113	12.2	18.2	11	17	15	20	12	14	7	7.6	103	108	0.9	1.3	128	247	133	140	3.7	4.4	2.3
0	1	1	5	15	6	5	4	0	0	0	0	0	3	0	0	0	0	0	0	0	2.875	56	37.2	40.1	12.4	13.1	209	248	17.8	18.2	14	14	21	21	16	16	8.8	8.8	103	103	1	1	145	145	138	138	4.2	4.2	0.7
0	1	1	6	10	5	2	3	0	0	0	0	0	2	0	0	0	0	0	0	0	2.125	23	36.9	36.9	12.3	12.3	80	80	2.6	2.6	8	8	30	30	10	10	9.2	9.2	104	104	0.4	0.4	99	99	142	142	3.7	3.7	1.2
0	1	1	6	15	6	5	4	0	0	0	0	0	0	0	0	0	0	0	0	0	2.08333	53	36.9	36.9	12.5	12.5	303	303	8.3	8.3	10.5	12.7	28	34	104	113	7.5	8.7	87	96	3.12	3.69	104	145	130	133	3.7	4.3	0.69
0	0	1	4	15	6	5	4	0	0	0	0	0	1	0	0	0	0	0	0	0	1.83333	56	23.9	26	8.2	8.7	172	172	17.4	17.4	8	8	28	28	23	23	8	8	96	96	1.7	1.7	102	102	132	138	4	4.4	1
0	0	1	2	15	6	5	4	0	0	0	0	0	0	0	0	0	0	0	0	0	3.04167	70	26.4	26.4	8.6	8.6	378	378	33	33	6	6	27	27	12	12	6.9	6.9	102	102	0.54	0.54	94	94	135	135	3.4	3.4	1.7
0	0	1	6	15	6	5	4	0	0	0	0	0	0	0	0	0	0	0	0	0	2.20833	43	26.5	26.3	9.2	9.2	326	350	12.7	14.1	10	12.4	20	20	16	13	7.9	7.8	106	106	1	0.83	159	114	139	138	3.8	4.2	1.1
0	0	1	6	13	6	4	3	0	0	0	0	0	0	0	0	0	0	0	0	1	1.04167	54	28.3	28.3	9.9	9.9	354	354	16.3	16.3	13	16	6	13	62	66	7.1	7.6	118	120	4.3	5.1	132	160	141	145	3.2	3.9	0.4
0	1	1	10	10	5	3	2	0	0	0	0	0	1	0	0	0	0	0	0	1	2.20833	89	36.2	43.8	12.3	14.2	91	120	5.6	7.7	13	15	24	24	38	38	8	8.4	102	102	2.2	2.3	197	211	139	141	4.2	5.1	1.6
0	0	1	8	3	1	1	1	0	0	0	0	0	0	0	0	0	0	0	0	0	4.875	88	44.6	44.6	14.9	14.9	261	261	17.1	17.1	15	20	12	16	40	42	8	8.6	102	107	1.6	1.7	162	236	134	135	4.3	4.6	2.1
0	0	1	10	3	1	1	1	5	0	0	0	0	0	0	0	0	0	0	0	0	6.25	24	24.7	35.6	6.9	11.1	120	134	21.5	33.3	14	16	21	23	61	65	7.4	7.6	100	105	1.5	2	129	326	136	137	4.8	4.9	2.5
0	1	1	7	10	5	1	4	0	0	0	0	0	1	0	0	0	0	0	0	0	2.16667	65	19.4	26.1	6	8.1	250	263	8.3	9.3	11	12	26	28	25	32	7.5	7.6	111	111	1.1	1.3	189	220	149	150	3.4	3.7	1.8
0	0	4	8	14	6	5	3	2	0	0	0	0	0	0	0	0	0	0	0	0	2.75	55	23.4	23.4	7.6	7.6	57	57	10.92	10.92	8	8	20	20	14	14	7	7	107	107	1.1	1.1	113	113	135	135	3.8	3.8	1.5
0	0	1	3	15	6	5	4	0	0	0	0	0	0	0	0	0	0	0	0	0	1.125	84	42.4	42.4	13.3	13.3	230	230	10.4	10.4	10	10	25	25	14	14	8.9	8.9	104	104	0.76	0.76	148	148	139	139	4.6	4.6	1.7
0	0	1	7	14	6	5	3	0	0	0	0	0	2	0	0	0	0	0	0	0	1.25	76	33.4	33.4	10.8	10.8	102	102	20.5	20.5	13	13	24	24	30	30	8.1	8.1	104	104	1	1	142	142	141	141	3.7	3.7	1.1
0	1	4	2	12	6	3	3	0	0	0	0	0	1	0	0	0	0	0	0	0	3.04167	82	29.9	34	9.7	11.1	173	182	11.1	12	6	8	28	30	39	45	9.5	9.7	99	105	1.2	1.4	103	104	134	141	3.9	4.3	1.1
0	0	1	2	15	6	5	4	0	0	0	0	0	0	0	0	0	0	0	0	0	1.29167	91	23.6	24.2	7.7	7.9	316	307	23.5	22.4	8	7	21	21	45	38	7.9	8	113	111	1.5	1.07	182	166	141	135	3.9	3.7	1.4
0	0	1	9	12	6	3	3	0	0	0	0	0	0	0	0	0	0	0	0	0	3.875	62	35.2	35.4	12.2	12.3	159	182	16.6	18.2	11	13	23	23	21	26	8.1	8.3	92	96	1.8	2	139	159	128	130	3.7	4	1.3
0	0	1	5	15	6	5	4	0	0	0	0	0	0	0	0	0	0	0	0	0	3.58333	87	38.3	38.3	13.1	13.1	101	101	15.3	15.3	10	10	23	23	21	21	8.4	8.4	103	103	0.8	0.8	124	124	136	136	3.1	4	2.1
0	1	1	7	9	1	5	3	0	0	0	0	0	1	0	0	0	0	0	0	0	1.45833	45	35.8	40	11.9	13.5	395	417	9.6	12.4	12	12	28	28	24	26	8.2	8.4	94	97	0.9	1	125	152	134	137	4	4.5	1.4
0	1	1	10	14	6	5	3	4	0	0	0	0	2	0	0	0	0	0	0	0	3.91667	68	31.3	39	9.8	13.4	94	108	8.4	9.4	7	9	36	37	22	22	9.1	9.3	90	96	0.7	1	167	227	132	140	3.9	5	1.3
0	1	1	7	15	6	5	4	0	0	0	0	0	1	0	0	0	0	0	0	0	1	72	30.1	30.1	9	9	11	11	19	19	7	7	22	22	39	39	7.1	7.1	114	114	2	2	95	95	143	143	4.5	4.5	1.9
1	0	1	6	15	6	5	4	2	2	0	0	0	0	0	0	0	0	0	0	0	2.54167	73	34.9	34.9	12.4	12.4	374	374	28.9	28.9	11.8	12.6	21	23	24	27	7.3	7.5	100	103	0.81	0.97	177	180	132	133	2.8	3.6	4
0	0	1	11	10	5	3	2	0	0	0	0	0	3	0	0	0	0	0	0	0	8.83333	57	24.4	30.9	8.2	10.1	69	84	13.4	15.8	5	7	26	27	7	12	8.1	8.2	104	108	0.5	0.6	103	118	138	139	3.5	3.5	1.3
0	0	1	4	15	6	5	4	0	0	0	0	0	2	0	0	0	0	0	0	0	1.95833	57	36.4	36.4	11.4	11.4	94	94	1.87	1.87	7	7	27	27	11	11	8.4	8.4	109	109	0.74	0.74	102	102	143	143	4.1	4.1	1.3
0	1	1	4	9	5	1	3	0	0	0	0	0	0	0	0	0	0	0	0	0	2.75	77	31	31	9.5	9.5	229	229	6.3	6.3	16.2	16.2	22	22	30	30	8.4	8.4	112	112	1.2	1.2	199	199	147	147	3.9	3.9	1.2
0	0	1	2	15	6	5	4	0	0	0	0	0	0	0	0	0	0	0	0	0	4.66667	57	35.7	35.7	12	12	191	191	10.92	10.92	11	16	22	22	23	25	8.5	8.9	90	95	1.03	1.44	236	292	128	128	3.1	3.5	0.9
0	1	1	2	15	6	5	4	0	0	0	0	0	0	0	0	0	0	0	0	0	1.125	66	29.8	29.8	10.3	10.3	300	326	13.9	13.9	5	5	25	25	19	19	7.8	7.8	105	105	1.17	1.17	109	109	135	135	3	3.1	1.2
0	0	1	5	14	6	5	3	1	0	0	0	0	1	0	0	0	0	0	0	1	1.70833	73	26.7	27.6	8.5	8.7	226	245	22.9	22.9	14	14	22	22	58	58	8.5	8.5	100	100	6.3	6.3	149	149	136	136	6.6	6.6	1.6
0	1	1	2	15	6	5	4	0	0	0	0	0	2	0	0	0	0	0	0	0	1.625	85	35.2	35.2	11.5	11.5	341	341	27.4	27.4	14	14	22	22	21	21	8.7	8.7	98	98	1.1	1.1	107	107	134	134	4.2	4.2	1.1
0	0	1	2	14	6	4	4	3	0	0	0	0	2	0	0	0	0	0	0	0	4.91667	68	27.8	29.2	9	9.2	242	264	10.7	15.4	6.8	7.4	27	27	15	17	6.7	7	104	105	0.51	0.51	120	132	136	136	2.9	3	1.1
0	1	1	3	15	6	5	4	0	0	0	0	0	1	0	0	0	0	0	0	0	2.375	84	42.3	48	14.2	16	123	123	13.1	14.9	17	16	26	28	33	38	8.9	8.9	89	94	4.86	5.54	111	142	132	135	4.4	4.8	2
0	0	1	15	7	5	1	1	1	0	0	0	0	0	0	0	0	0	0	0	0	9.79167	55	41.6	49	13.3	16	263	361	23.1	36.4	17	19	18	19	46	48	7.2	7.4	90	93	2.2	2.8	99	132	126	128	3.5	4.1	1.7
0	0	1	6	15	6	5	4	0	0	0	0	0	1	0	0	0	0	0	0	1	1.29167	83	27.3	26.6	8.5	8.2	68	88	34.96	36.66	16	13	22	22	21	21	6.8	6.8	98	97	3.79	4	136	122	133	134	3	3.6	0.8
1	0	1	10	10	5	3	2	6	0	0	0	0	1	0	0	0	0	0	0	1	8.125	63	31.5	35.4	10.7	11.7	198	227	8.8	13.2	20	20	20	20	32	32	6.8	6.8	93	93	4.1	4.1	163	163	133	133	4.5	4.5	1.5
0	0	1	8	15	6	5	4	0	0	0	0	0	3	0	0	0	0	0	0	0	1.875	51	28.9	30	8.9	10.3	196	196	10	10	11	12	24	25	24	27	7.4	7.7	100	100	1.1	1.1	97	114	136	139	3.2	3.8	1.1
0	0	1	5	15	6	5	4	0	0	0	0	0	1	0	0	0	0	0	0	1	2.20833	81	35.7	34.2	10.4	10	188	174	2.7	0.8	7	7	36	37	26	31	10	8.9	111	110	1.68	2.1	105	87	152	153	5.6	5.6	1.5
0	0	1	5	15	6	5	4	0	0	0	0	0	0	0	0	0	0	0	0	1	1	87	27.3	27.4	8.4	8.5	310	310	5.2	5.2	10	10	25	25	21	21	8.6	8.6	101	101	1.46	1.46	154	154	136	136	4.9	4.9	1.7
1	0	1	6	13	6	4	3	0	0	0	0	0	2	0	0	0	0	0	0	0	2.375	91	19.3	26.2	6.6	8.9	168	194	8.6	11.7	6	6	25	25	25	25	7.3	7.3	107	107	0.7	0.7	105	105	138	138	3.3	3.3	1.3
0	0	1	6	15	6	5	4	3	0	0	0	0	0	0	0	0	0	0	0	0	2.25	86	35.4	35.4	11.2	11.2	260	260	8.9	8.9	6	8	25	26	26	30	7.7	7.8	97	98	1.1	1.1	90	145	130	130	4.3	4.6	1.9
0	1	1	6	14	6	5	3	1	0	0	0	0	2	0	0	0	0	0	0	0	1.79167	78	47.1	47.1	15.4	15.4	222	222	13.8	13.8	14	16	13	18	58	69	6.9	7.3	109	111	2.4	2.5	179	317	139	141	3.4	4.1	1.7
1	1	1	6	15	6	5	4	0	0	0	0	0	3	0	0	0	0	0	0	0	1.83333	66	27	27	9.2	9.2	41	41	1.6	1.6	7	7	26	26	22	22	8.5	8.5	100	100	0.9	0.9	150	150	133	133	3.4	3.4	0.8
0	0	1	11	3	1	1	1	6	0	0	0	0	0	0	0	0	0	0	0	0	18.5417	63	30.5	37.2	9.1	11.8	179	344	7	20	13	15	12	15	17	19	6.3	6.6	113	115	1.2	1.2	115	175	140	145	3.8	4.9	5.9
0	1	4	6	15	6	5	4	0	0	0	0	0	2	0	0	0	0	0	0	0	3.54167	27	29.6	29.6	10.1	10.1	71	71	21.3	21.3	10	12	18	20	33	48	7.2	7.4	109	112	0.6	0.7	121	137	140	141	2.6	3	0.7
0	0	1	10	15	6	5	4	0	0	0	0	0	1	0	0	0	0	0	0	0	4.45833	77	31.3	31.3	9.9	9.9	196	197	4.6	4.4	2	2	50	50	34	34	7.7	7.7	90	90	0.6	0.6	171	171	142	142	3.5	3.5	2.4
0	0	1	2	15	6	5	4	0	0	0	0	0	0	0	0	0	0	0	0	0	2.08333	83	29.2	29.2	9.7	9.7	177	177	12.9	12.9	10	10	16	16	24	24	8	8	104	104	1.09	1.09	164	164	130	130	4.5	4.5	0.8
0	0	1	13	5	2	1	2	3	0	0	0	0	2	0	0	0	0	0	0	0	14.875	60	21.7	36.5	7.7	12.2	128	238	15	29.4	15	20	14	16	20	28	6.8	8.2	98	107	1.1	1.6	188	256	130	136	3.9	4.7	5.2
0	0	1	10	7	5	1	1	0	0	0	0	0	1	0	0	0	0	0	0	0	2.375	78	27.9	27.9	9.3	9.3	224	224	8	8	11	11	22	22	26	26	7.5	7.5	112	112	1	1	87	87	145	145	2.9	2.9	1.4
0	0	1	8	15	6	5	4	0	0	0	0	0	1	0	0	0	0	0	0	0	3.95833	68	25.1	25.1	8.5	8.5	99	99	0.1	0.1	18	18	23	23	31	31	8.4	8.4	100	100	1.57	1.57	101	101	141	141	3	3	1
0	1	1	8	14	6	5	3	0	0	0	0	0	0	0	0	0	0	0	0	0	2.20833	21	28.2	36	10.6	13.1	173	203	13.5	21	10	11	20	22	10	11	8.2	8.3	107	107	0.9	1	102	114	138	139	3.3	3.8	1.2
0	1	1	2	14	6	4	4	1	0	0	0	0	0	0	0	0	0	0	0	0	1.5	53	33.7	32.8	10.9	10.7	163	142	6.8	5.2	8	11	22	24	11	16	8.6	8.7	103	108	0.6	0.81	121	187	133	138	3.6	4.1	1.1
0	0	1	4	11	5	3	3	0	0	0	0	0	1	0	0	0	0	0	0	0	2.08333	60	27	29.1	8.7	9.4	167	170	6.5	11.7	9	8	24.7	24.7	16	16	7.5	7.5	121	121	0.7	0.7	150	150	152	152	3.7	3.7	0.8
0	1	1	4	14	6	5	3	0	0	0	0	0	0	0	0	0	0	0	0	0	2.75	43	38.6	39.9	13.1	13.7	366	381	19.5	28.5	12	18	19	24	23	27	8	8.6	89	91	1.3	1.6	110	151	126	129	2.8	3.9	1.1
1	1	1	7	15	6	5	4	9	0	0	0	0	0	0	0	0	0	0	0	0	4.375	79	22.8	26.8	7.7	10.3	153	156	6.92	17.36	17	18	17	20	48	51	7.9	8.6	103	107	3.61	3.72	84	95	140	142	3.3	3.7	1.6
0	0	1	13	10	5	3	2	3	0	0	0	0	3	0	0	0	0	0	0	0	2.08333	81	22.4	22.4	7	7.8	125	125	30	30	12	12	17	17	41	41	6.6	6.6	110	110	1.8	1.8	295	295	139	139	4.7	5	2.4
0	0	1	3	15	6	5	4	0	0	0	0	0	4	0	0	0	0	0	0	0	1.29167	49	34	34	11.7	11.7	148	148	14.7	14.7	9	11	23	24	7	11	6.7	7.8	103	105	0.5	0.6	145	205	137	138	3.1	3.8	1.4
0	0	1	2	14	6	5	3	0	0	0	0	0	4	0	0	0	0	0	0	0	1.29167	64	23.7	22.1	7.4	6.9	205	199	17.6	17.6	4	7	27	29	15	15	8.8	9.1	97	99	0.7	0.7	107	107	130	133	4	5.9	0.8
0	0	1	8	12	5	5	2	0	0	0	0	0	3	0	0	0	0	0	0	0	13.7917	64	34	34	8.4	11.4	100	100	11.4	11.4	8	11	21	21	18	23	7.8	8.3	97	98	0.7	0.8	144	226	126	132	3	3.7	2.6
0	0	1	5	8	4	2	2	0	0	0	0	0	0	0	0	0	0	0	0	0	16.9583	57	33.3	33.3	10.9	10.9	154	154	7.9	7.9	14	19	15	20	64	67	7.9	8.1	104	114	3.33	3.33	168	177	143	143	4.4	5	1.3
0	0	1	9	12	5	3	4	0	0	0	0	0	0	0	0	0	0	0	0	0	5.33333	58	26.4	27.5	8.5	8.8	124	136	4.7	2.4	4	4	28	30	22	25	8.8	9	110	111	1.15	1.5	109	125	139	142	4.2	4.3	2.3
0	0	1	16	9	5	3	1	2	0	0	0	0	2	0	0	0	0	0	0	1	7.91667	57	25.1	26.7	8.8	9.5	23	26	1	1.6	14	15	20	21	86	89	7.1	7.2	98	99	2.9	2.9	35	142	133	134	4.4	4.8	0.7
0	0	1	15	8	4	3	1	3	0	0	0	0	1	0	0	0	0	0	0	1	16.2083	68	26.3	32.8	8.5	11.1	23	55	3.3	5.2	18	21	13	18	65	78	7.3	8.5	95	98	3.1	3.3	337	377	131	132	5.2	5.5	1.2
1	0	1	15	4	1	1	2	0	0	0	0	0	1	0	0	0	0	0	0	0	1.70833	35	27.7	27.7	9.6	9.6	125	125	1.6	1.6	18	18	8	8	9	9	6.6	7.2	112	112	0.9	0.9	217	217	137	145	2.7	3.3	4.1
0	1	1	4	9	4	3	2	0	0	0	0	0	3	0	0	0	0	0	0	0	4.91667	79	31.6	31.6	9.6	9.6	265	265	25.1	25.1	8	8	31	31	60	60	8.7	8.7	107	107	1.29	1.29	118	118	146	146	5.1	5.1	3.5
0	1	1	8	15	6	5	4	3	0	0	0	0	1	0	0	0	0	0	0	0	3.5	77	31.6	31.6	10.9	10.9	316	316	34.9	34.9	18	21	12	16	59	63	7.1	7.4	100	103	2.84	3.27	155	207	134	136	3	3.2	0.8
0	1	1	2	15	6	5	4	0	0	0	0	0	0	0	0	0	0	0	0	0	1.29167	77	24.1	25	8.3	8.6	186	186	7.7	7.7	8	8	20	20	29	29	8.2	8.2	108	108	1.1	1.1	98	98	136	136	4.2	4.2	0.6
0	1	1	9	13	5	5	3	3	0	0	0	0	1	0	0	0	0	0	0	0	2.16667	55	35.8	36	12.1	12.5	169	174	15.8	17.6	12	12	23	23	33	33	7.5	7.5	100	100	2	2	172	172	135	135	4.9	4.9	1.2
0	1	1	3	15	6	5	4	0	0	0	0	0	0	0	0	0	0	0	0	0	1.5	49	28.5	28.5	9.8	9.8	242	242	5.4	5.4	9	9	24	24	19	19	9	9	97	97	0.9	0.9	102	102	130	130	3.7	3.7	0.4
0	1	1	2	15	6	5	4	0	0	0	0	0	3	0	0	0	0	0	0	0	2.70833	55	38.7	38.7	12.3	12.3	167	167	10.6	10.6	6	6	26	26	16	17	8.3	8.3	106	106	1.5	1.5	120	120	138	138	3.8	3.8	1.9
0	0	4	3	15	6	5	4	0	0	0	0	0	3	0	0	0	0	0	0	0	1.125	28	32.7	32.7	11	11	124	124	21.9	21.9	7	9	17	21	10	14	7.2	7.2	110	117	0.7	0.7	153	153	135	141	3.6	4.5	1.1
1	1	1	10	3	1	1	1	0	0	0	0	0	2	0	0	0	0	0	0	0	5.83333	91	38.2	38.2	13	13	67	67	6.1	6.1	8	8	21	21	45	45	8.1	8.1	96	96	1.72	1.72	110	110	125	125	3.9	3.9	2.4
0	0	1	6	11	5	3	3	0	0	0	0	0	1	0	0	0	0	0	0	0	2.75	35	31.7	31.7	10.5	10.5	251	251	26.9	26.9	7	7	21	21	23	23	7.4	7.4	113	113	0.8	0.8	133	133	140	140	3.5	3.5	0.9
0	0	1	8	3	1	1	1	0	0	0	0	0	1	0	0	0	0	0	0	0	9.70833	68	20.1	22.2	6.5	7.4	276	285	3.1	2.7	12	12	23	23	7	7	8.8	8.8	104	104	0.69	0.69	140	140	139	139	3.9	3.9	2
0	0	1	6	15	6	5	4	0	0	0	0	0	0	0	0	0	0	0	0	0	1.41667	79	37.5	37.5	11.9	11.9	143	143	7.8	7.8	7	7	24	24	21	21	8.3	8.3	110	110	0.9	0.9	114	114	141	141	4	4	2.4
0	1	1	4	15	6	5	4	0	0	0	0	0	3	0	0	0	0	0	0	0	1.625	49	39.1	39.1	13.8	13.8	93	93	8.8	8.8	9	10	23	24	9	9	7.7	7.7	104	112	0.9	0.9	94	94	135	141	3.3	4	1.6
0	0	1	6	15	6	5	4	0	0	0	0	0	1	0	0	0	0	0	0	0	1.04167	79	30.2	30.2	9.8	9.8	55	55	2	2	8	8	23	23	10	10	7.3	7.3	109	109	0.65	0.65	89	89	140	140	3.4	3.4	1.7
0	0	1	3	13	6	4	3	0	0	0	0	0	0	0	0	0	0	0	0	0	3.875	91	29.7	29.7	9.9	9.9	653	653	35.7	35.7	8	8	22	22	16	16	8.4	8.4	99	99	0.87	0.87	140	140	129	129	5.3	5.3	1.5
0	1	1	6	15	6	5	4	0	0	0	0	0	0	0	0	0	0	0	0	0	1.45833	66	36.7	36.7	12.5	12.5	147	147	17.4	17.4	11	11	22	22	41	41	8.1	8.1	98	98	1.98	1.98	176	176	131	131	3.7	3.7	1.4
0	0	1	7	12	5	4	3	0	0	1	0	0	0	0	0	0	0	0	0	0	3.41667	75	34.5	34.5	10.7	10.7	155	155	12.7	12.7	11.3	12.4	21	22	19	21	7.2	7.3	111	113	0.88	0.88	134	155	141	142	3.7	4.2	1.4
0	0	1	10	15	6	5	4	0	0	0	0	0	0	0	0	0	0	0	0	0	2.25	82	29.2	35	9.9	11.8	146	146	7.3	7.3	12	15	21	24	24	31	8.5	8.8	101	102	1	1.4	149	167	137	140	3.9	4.4	1.9
0	0	1	3	15	6	5	4	0	0	0	0	0	1	0	0	0	0	0	0	0	3	91	36.2	36.2	12.3	12.3	282	282	32.2	32.2	16	16	20	20	27	27	8.3	8.3	99	99	0.8	0.8	237	237	135	135	4	4	2
0	0	1	7	13	6	4	3	0	0	0	0	0	0	0	0	0	0	0	0	0	5.08333	57	25.2	25.2	7.6	7.6	132	132	0.2	0.2	8	8	22	22	6	6	7.4	7.4	110	110	0.49	0.58	159	159	140	140	3.8	3.8	0.6
0	1	4	8	9	5	3	1	0	0	0	0	0	2	0	0	0	0	0	0	0	3.66667	49	42	43.5	13.5	14.4	568	568	39.7	39.7	12	12	26	26	43	43	8.3	8.3	102	102	1.5	1.5	112	112	140	143	4.6	5.1	1.8
0	0	1	12	8	5	1	2	1	0	0	0	0	2	0	0	0	0	0	0	0	4.375	84	25	25.9	7.9	8.4	294	409	20.5	25.1	9	10	22	23	19	20	7.9	7.9	105	106	0.39	0.41	111	125	137	138	3.6	3.8	2
0	0	4	8	3	1	1	1	2	0	0	0	0	1	0	0	0	0	0	0	0	7.08333	29	39.5	39.5	12.5	12.5	169	169	11.3	11.3	9	16	18	26	29	48	7.4	7.9	112	113	0.6	1	137	404	147	148	2.9	3.5	4.4
0	0	4	8	6	3	1	2	0	0	0	0	0	3	0	0	0	0	0	0	0	2.29167	30	29.8	42.7	9.6	14.7	204	331	7.5	21.4	11	17	21	23	13	14	8.1	9	106	112	0.4	0.7	128	151	144	146	3.7	5.1	2.2
0	0	4	5	15	6	5	4	1	0	0	0	0	0	0	0	0	0	0	0	0	1.375	43	24	28.1	7.1	8.6	154	154	16.8	16.8	8	12	17	18	6	6	7.4	8	109	111	0.6	0.6	149	149	137	138	2.3	4	1.4
1	0	1	17	3	1	1	1	2	0	0	0	0	2	0	0	0	0	0	0	0	2	52	29.1	40.6	8.7	12.3	62	83	14.2	21.2	17	30	14	20	57	58	8.6	8.7	80	90	2.59	2.72	165	236	120	126	5.5	6.2	7
1	1	1	4	14	6	5	3	3	0	0	0	0	0	1	0	0	0	0	0	0	1.75	86	32.7	39.2	10.6	12.7	150	160	19.61	23.54	15	22	25	30	164	193	8.4	9.3	86	99	2.38	3.13	136	235	137	144	3.9	4.6	1.8
0	1	1	6	14	6	5	3	0	0	0	0	0	0	0	0	0	0	0	0	1	1.70833	56	37.5	37.5	12.7	12.7	197	197	10.2	10.2	13	13	26	26	16	16	8.3	8.3	104	104	1.5	1.5	100	100	143	143	3.1	3.6	1.2
0	1	2	8	15	6	5	4	0	0	0	0	0	1	0	0	0	0	0	0	0	3.625	76	27.6	27.6	9.2	9.2	160	160	12.9	12.9	11.5	11.5	22	22	40	40	7.3	7.3	108	108	1.66	1.66	119	119	138	138	3.4	3.5	1
0	0	1	2	15	6	5	4	0	0	0	0	0	0	0	0	0	0	0	0	0	1.45833	79	37.5	37.5	12.5	12.5	186	186	12.9	12.9	14	14	26	26	19	19	9.3	9.3	97	97	1.1	1.1	219	219	137	137	4.3	4.3	3.8
0	1	1	8	10	5	3	2	3	0	0	0	0	2	0	0	0	0	0	0	0	1.91667	77	36	38	12.1	13.1	157	157	7.8	7.8	12	12	19	19	24	24	7.8	7.8	107	107	1.1	1.1	250	250	138	141	3.8	3.9	1.6
0	1	1	13	10	5	3	2	3	0	0	0	0	2	0	0	0	0	0	0	0	5.91667	60	37.7	41	11.3	14	182	183	10.5	12.9	24	24	22	27	115	119	5.8	5.8	77	77	9.2	9.2	124	227	121	128	4.2	5	1.9
0	0	1	4	15	6	5	4	0	0	0	0	0	0	0	0	0	0	0	0	0	2.79167	78	34.3	34.3	11.1	11.1	237	237	13.6	13.6	9	9	32	32	31	31	8.8	8.8	97	97	0.9	0.9	203	203	138	138	4.7	4.7	2
0	1	1	7	15	6	5	4	0	0	0	0	0	1	0	0	0	0	0	0	1	1.66667	70	29.1	29.1	9.5	9.5	186	186	21.7	21.7	26	26	20	20	48	48	6.9	6.9	89	89	6.56	6.56	265	265	135	135	3.8	3.8	0.7
0	1	1	7	15	6	5	4	0	0	0	0	0	0	0	0	0	0	0	0	0	3.66667	79	21.6	31.8	7.3	11.1	135	150	21.5	27.4	13	15.2	19	20	40	48	6.6	6.6	109	109	2.2	3	125	130	139	139	4.3	4.6	1
0	1	1	7	14	6	4	4	1	0	0	0	0	1	0	0	0	0	0	0	0	1.79167	82	41.9	41.9	13.7	13.7	137	137	19.3	19.3	11	12	18	21	51	55	8	8.1	117	119	1.69	1.82	103	108	149	149	3.6	3.6	2.4
1	1	1	12	6	4	1	1	2	0	0	0	0	0	0	0	0	0	0	0	0	13.6667	85	24.9	24.9	7.9	7.9	78	78	5	5	14	13	22	22	26	26	7.1	7.1	101	101	1.1	1.1	151	151	134	134	4.2	4.2	2.8
1	1	1	4	9	5	1	3	0	0	0	0	0	1	0	0	0	0	0	0	0	1.91667	44	35.6	35.6	11.9	11.9	241	241	14.49	14.49	11	11	22	22	10	10	8.1	8.1	107	107	0.8	0.8	113	113	140	140	4.2	4.2	1.8
0	1	1	3	11	4	3	4	0	0	0	0	0	1	0	0	0	0	0	0	0	1.41667	43	30.6	30.6	9.9	9.9	268	268	8.34	8.34	10	10	22	22	11	11	7.7	7.7	109	109	0.65	0.65	110	110	141	141	3.8	3.8	1.8
0	1	1	4	8	2	3	3	0	0	0	0	0	2	0	0	0	0	0	0	0	3.875	44	28.4	33.2	9.2	10.6	185	223	7.41	9.95	12	12	19	19	9	9	7.8	7.8	107	107	0.64	0.64	99	99	138	138	3.5	3.5	1.28
0	1	4	9	10	5	2	3	0	0	0	0	0	2	0	0	0	0	0	0	0	4.70833	75	42.2	42.2	12.5	12.5	220	220	21.5	21.5	7	7	26	26	37	37	7.4	7.4	118	118	1.2	1.2	168	168	150	150	3.5	3.5	1.1
0	1	1	9	6	4	1	1	0	0	0	0	0	0	0	0	0	0	0	0	1	2.95833	91	33	33.8	10.5	11.3	250	261	11.9	13.1	10	13	22	23	25	28	8.2	8.6	102	105	1.9	2	96	111	137	138	3.6	4.3	1.2
0	1	1	11	10	4	3	3	5	0	0	0	0	2	0	0	0	0	0	0	1	6.45833	73	31.6	31.6	10.3	10.3	167	167	23.2	23.2	15	15	25	25	29	29	8.9	8.9	91	91	5.21	5.21	257	257	131	131	4.9	4.9	1.8
0	1	1	3	15	6	5	4	0	0	0	0	0	2	0	0	0	0	0	0	0	3.625	65	16.4	16.9	5.3	5.4	89	92	2.6	2.6	10	10	23	23	17	17	8.5	8.5	102	102	0.5	0.5	97	97	135	135	3.4	3.4	1.2
0	1	1	5	15	6	5	4	0	0	0	0	0	2	0	0	0	0	0	0	0	4	71	40.2	40.2	12.5	12.5	153	153	17.6	17.6	7	12	24	27	33	41	7.7	7.9	94	98	1.23	1.56	154	181	130	132	4.5	4.9	2.1
0	1	1	4	15	6	5	4	0	0	0	0	0	4	0	0	0	0	0	0	0	1.79167	67	27.8	27.8	9.3	9.3	37	37	0.4	0.4	12	14	28	30	22	29	7.8	8.2	97	97	0.76	0.88	140	183	139	139	3.7	3.8	3
1	0	1	11	3	1	1	1	2	0	0	0	0	3	0	0	0	0	0	0	0	1.08333	64	38.7	40.4	13.1	13.6	159	169	10.8	17.9	13	25	8	13	28	38	6.5	7.1	86	100	0.8	1.2	190	424	119	127	5.3	5.6	4.1
0	1	1	7	14	6	5	3	3	0	0	0	0	1	0	0	0	0	0	0	0	3.41667	78	29.4	29.4	9.6	9.6	133	133	0.4	0.4	12	12	20	20	39	39	7.9	7.9	102	102	1.3	1.3	106	106	134	134	4.4	4.4	2.3
1	1	1	8	14	6	4	4	0	0	0	0	0	0	0	0	0	0	0	0	0	1.16667	65	30.6	30.6	9.9	9.9	225	225	78.52	78.52	14	18	13	16	57	70	8.5	8.8	94	99	1.97	3.3	220	458	127	129	5.7	6.3	4.8
0	0	1	7	13	6	4	3	0	0	0	0	0	1	0	0	0	0	0	0	0	1.91667	81	23.8	32.9	6.6	10.7	498	498	29.1	29.1	19	19	27	27	79	79	7.6	7.6	90	90	3.6	3.6	145	145	136	136	3.3	4	2.3
1	0	1	8	9	4	3	2	7	0	0	0	0	1	0	0	0	0	0	0	0	1.33333	67	36.2	38.4	12.1	12.9	105	124	9.2	14.9	9.3	12.6	12	15	37	40	6.5	7	106	114	1.08	1.21	169	288	126	134	4.3	4.7	2.6
0	0	1	6	11	5	3	3	0	0	0	0	0	0	0	0	0	0	0	0	0	6.875	57	41.9	45	14.1	15.3	206	206	25.3	25.3	15	22	22	27	75	77	7.2	8.2	93	97	6.6	6.9	112	124	135	140	3.2	4	1
0	1	1	7	10	5	2	3	0	0	0	0	0	2	0	0	0	0	0	0	0	1.54167	19	37	37	12.8	12.8	230	230	26.4	26.4	9	9	23	23	13	13	7.9	7.9	112	112	0.57	0.57	96	96	144	144	3.6	3.6	1
0	0	1	7	7	5	1	1	0	0	0	0	0	2	0	0	0	0	0	0	0	5.75	29	32.1	36	10.7	12.2	341	341	17.5	17.5	14	14	24	24	12	12	8.8	8.8	100	100	0.6	0.6	89	89	138	141	4	4.5	1.2
1	0	1	8	10	5	3	2	0	0	0	0	0	1	0	0	0	0	0	0	0	4.25	72	27	27.9	9.8	10.2	243	246	15.3	21.1	12	14	11	15	32	38	8.6	8.8	122	127	0.9	1.1	137	151	147	154	1.6	4.7	0.8
0	0	4	5	15	6	5	4	0	0	1	0	0	0	0	0	0	0	0	0	0	1.66667	49	34	34	11.8	11.8	118	118	7.5	7.5	16.1	22	19.4	19.4	52	52	8.7	8.7	102	102	2.9	2.9	89	89	139	139	3.8	3.8	3.3
0	0	1	5	15	6	5	4	0	0	0	0	0	0	0	0	0	0	0	0	0	1.20833	45	41.7	41.7	14.3	14.3	184	184	4.8	4.8	12	12	27	27	9	9	9.7	9.7	96	96	0.8	0.8	92	92	135	135	3.5	3.5	1.9
0	1	1	3	15	6	5	4	0	0	0	0	0	1	0	0	0	0	0	0	0	3.70833	67	25.9	27.7	8.6	8.9	572	694	30	30.2	12	21	18	24	41	51	8.1	8.4	90	103	1.2	1.6	354	763	129	139	3.8	4.4	1.4
0	1	1	4	14	6	5	3	4	0	0	0	0	1	0	0	0	0	0	0	0	1.16667	65	36.5	46.4	12.5	15.3	206	275	29.2	46.2	6	15	19	25	39	52	7.9	8.2	108	111	1	2.5	118	127	142	142	3.8	5.3	3.3
0	1	1	7	11	5	3	3	0	0	0	0	0	0	0	0	0	0	0	0	0	2.45833	77	26.9	26.9	9.1	9.1	152	152	23.9	23.9	16	16	18	18	38	38	7.9	7.9	102	102	2.7	2.7	194	194	136	136	5.1	5.1	1.1
0	1	4	7	13	6	4	3	0	0	0	0	0	0	0	0	0	0	0	0	0	1.16667	66	20.1	27.5	6.6	9.2	14	19	3	3.3	10	10	22	22	14	14	6.1	6.1	105	105	0.57	0.57	114	114	137	137	3.6	3.6	2.3
0	1	1	2	15	6	5	4	0	0	0	0	0	0	0	0	0	0	0	0	0	1.20833	91	30.5	30.5	9.2	9.2	249	249	12.1	12.1	9	9	28	28	22	22	8.5	8.5	98	98	1	1	102	102	135	135	4.9	4.9	1.1
0	0	1	9	11	5	3	3	1	0	0	0	0	2	0	0	0	0	0	0	0	1	46	25.4	25.5	7.4	7.5	575	604	15.7	17	10	10	23	23	8	8	7.5	7.5	104	104	0.7	0.7	138	138	137	137	3.7	3.7	1
0	0	1	10	10	5	3	2	1	0	0	0	0	1	0	0	0	0	0	0	1	4.70833	54	29.6	31.4	9.2	9.8	326	351	16.9	21	13	15	16	17	26	35	7.2	8.1	99	109	2.1	2.6	104	136	129	139	3.5	4.5	1.9
0	1	1	5	15	6	5	4	3	0	0	0	0	0	0	0	0	0	0	0	0	1.875	75	37.6	37.6	13	13	139	139	14.4	14.4	11	11	22	23	7	8	7.1	7.4	104	105	0.76	0.79	147	183	137	139	3.5	3.7	2.3
1	1	1	8	3	1	1	1	0	0	0	0	0	3	0	0	0	0	0	0	0	9.16667	30	32.1	32.1	12.8	12.8	216	216	9.4	9.4	16	16	16	16	12	12	8.9	8.9	99	99	1	1	89	89	130	131	3	3	2.2
0	1	2	7	10	5	3	2	0	4	0	0	0	0	0	0	0	0	0	0	0	4.41667	66	30.5	30.5	9.8	9.8	283	283	15.4	15.4	11	11	22.3	22.3	32	32	8.7	8.7	115	115	1.4	1.4	120	120	148	148	3.6	3.6	0.8
0	1	1	2	15	6	5	4	0	0	0	0	0	2	0	0	0	0	0	0	0	5.875	59	24.3	24.3	7.8	7.8	275	275	15.2	15.2	8	8	26	26	16	16	7.8	7.8	104	104	0.6	0.6	159	159	138	138	3.3	3.3	2.6
0	1	1	5	15	6	5	4	0	0	0	0	0	0	0	0	0	0	0	0	0	8.45833	59	26.1	26.1	8.1	8.1	301	301	9.3	9.3	10	10	28	28	30	30	8.5	8.5	101	101	0.9	0.9	140	140	139	139	3.7	3.7	1.9
0	1	1	5	15	6	5	4	0	0	0	0	0	2	0	0	0	0	0	0	0	1.58333	68	17.8	25.7	6.1	9.2	34	37	0.8	2.6	9	9	19	19	15	15	6.8	6.8	107	107	0.7	0.7	97	97	135	135	3.6	3.6	1.2
0	1	1	13	6	4	1	1	3	0	0	0	0	1	0	0	0	0	0	0	1	2.83333	87	29.7	31	9.7	10.1	92	92	11.2	11.2	12	13	23	26	25	37	7.8	8.7	98	100	4.04	4.76	130	176	133	139	3	4.1	1.2
0	1	1	7	14	6	4	4	2	0	0	0	0	6	0	0	0	0	0	0	0	1.29167	43	23.3	23.3	8.2	8.2	170	170	22.8	22.8	8	12	17	25	35	40	6.9	7	101	103	1.2	1.5	139	183	132	134	3.3	3.5	1.2
0	1	1	8	12	5	5	2	0	0	0	0	0	2	0	0	0	0	0	0	1	1.29167	50	39	55	13.2	18.9	335	466	26.7	30.1	10	34	4	28	9	21	6.9	10	99	106	1.6	2.3	110	133	140	142	3	6.3	2.3
1	0	1	8	8	5	1	2	0	0	0	0	0	0	0	0	0	0	0	0	0	3.79167	80	30.8	34	10	11.4	195	195	12.7	12.7	8	9	28	30	12	12	7.9	8.4	98	99	1	1	156	156	135	137	2.7	3.6	1
0	1	1	2	14	6	5	3	0	0	0	0	0	0	0	0	0	0	0	0	0	1.79167	50	34.7	34.7	11.4	11.4	193	193	9.89	9.89	12	14	17	18	20	20	8.8	8.9	105	106	0.89	1.19	126	132	135	137	3.4	4.5	1.9
0	1	1	3	15	6	5	4	0	0	0	0	0	0	0	0	0	0	0	0	0	2.29167	77	36.1	36.1	12.9	12.9	308	308	14.3	14.3	12	14	28	29	14	17	9.4	9.7	83	92	1.3	1.6	152	161	125	133	3.4	3.7	2.2
0	0	1	2	15	6	5	4	0	0	0	0	0	0	0	0	0	0	0	0	0	1.125	82	36.5	37.7	12.2	12.5	170	166	9	8.11	7	6	24	23	28	20	7.3	7	116	111	0.69	0.66	146	83	144	142	4.3	4.6	1.3
0	1	1	8	15	6	5	4	5	0	0	0	0	0	0	0	0	0	0	0	0	2.33333	91	33.2	33.2	10.7	10.7	162	162	18.8	18.8	10.3	12	25	25	42	44	7.4	7.5	101	102	1.52	1.59	169	210	133	134	4	4.1	1.6
0	1	4	7	11	4	3	4	0	0	0	0	0	2	0	0	0	0	0	0	0	2	56	27.1	35.1	8.8	11.2	291	405	7	14.6	10	10	30	30	14	15	8	8.2	97	99	0.7	0.7	130	172	137	139	3.4	4.1	1
0	1	1	11	15	6	5	4	3	0	0	0	0	3	0	0	0	0	0	0	0	1.54167	72	21.3	25.4	7.2	8.3	23	23	1.2	1.7	6	7	24	26	19	19	7.3	7.3	96	96	1.1	1.1	100	100	128	128	3.2	3.4	0.7
1	1	4	8	3	1	1	1	0	0	0	0	0	0	0	0	0	0	0	0	0	25.9167	69	34.7	34.7	10.8	10.8	234	234	16.7	16.7	10	12	22	22	28	28	8.1	8.1	103	103	1.4	1.4	157	157	136	136	3.7	3.7	1
1	1	1	10	15	6	5	4	5	0	0	0	0	0	0	0	0	0	0	0	1	1	91	36.4	36.4	12	12	167	167	18	18	11	13.7	25	25	34	43	8.1	8.6	99	102	2.7	3.2	163	180	131	136	5.6	6.2	2.2
0	1	1	12	7	5	1	1	3	0	0	0	0	2	0	0	0	0	0	0	0	4.95833	63	26.9	26.9	9.4	9.4	85	85	20.1	20.1	11	11	21	21	28	28	8.8	8.8	102	102	1.1	1.1	115	115	134	134	4.9	4.9	1.2
0	1	4	8	14	6	5	3	5	2	0	0	0	0	0	0	0	0	0	0	1	3.5	70	31.2	31.2	10.3	10.3	235	235	31.5	31.5	14	14	24	24	50	50	8.8	8.8	96	96	3.31	3.31	203	203	134	134	5.4	5.4	1.9
1	1	1	15	8	4	2	2	3	0	0	0	0	0	0	0	0	0	0	0	0	1.625	73	23.3	28.4	7.8	9.5	77	87	2.93	3.13	8	12	16	18	48	54	6.5	6.9	107	109	1.9	2.4	105	122	133	137	2.9	3.2	1
0	1	1	7	10	5	3	2	0	0	0	0	0	1	0	0	0	0	0	0	0	1.41667	25	39.6	40.5	13.6	14.1	220	234	26.6	33.9	12	14	21	22	18	20	7.5	8	98	100	1.1	1.3	73	81	133	134	3.7	4.5	2.9
1	0	1	6	15	6	5	4	0	0	0	0	0	0	0	0	0	0	0	0	1	3.41667	89	35.6	41.2	12	13.8	200	239	20.2	37.2	6	9	30.3	31.5	22	25	8.9	9.3	90	95	0.8	1.1	83	114	129	133	4	4.6	1.2
0	1	1	10	10	5	3	2	5	0	0	0	0	1	0	0	0	0	0	0	0	1.83333	66	19.5	22.3	7.2	8	227	417	25.8	34.7	12	15	20	28	76	86	6.6	7.4	93	100	2.2	2.5	181	401	130	138	3.1	3.6	1.8
0	1	4	8	14	6	5	3	0	0	0	0	0	0	0	0	0	0	0	0	1	1.375	55	26	32.4	8.6	10.5	115	149	14.3	20.1	11	19	20	24	17	21	8.7	8.9	94	99	5.2	6	60	106	133	134	3.7	4	1.8
0	1	4	8	14	6	5	3	0	0	0	0	0	0	0	0	0	0	0	0	0	2.54167	35	26.1	26.1	8.9	8.9	129	129	12.7	12.7	16	19	18	19	41	44	6.2	6.5	91	95	2.1	2.9	105	115	128	130	3.6	3.8	2
0	0	4	7	10	5	3	2	0	0	0	0	0	3	0	0	0	0	0	0	0	1.83333	23	23.5	23.5	7.5	7.5	253	253	14.9	14.9	14	14	25	25	10	10	8.2	8.2	99	99	0.7	0.7	122	122	138	138	3.6	4.7	0.9
1	1	1	16	10	5	3	2	4	0	0	0	0	3	0	0	0	0	0	0	1	3.33333	46	17.7	25.2	6.7	8.4	16	22	0.1	0.1	16	24	6	19	14	49	7.2	7.9	97	100	0.9	2	103	134	127	135	3.6	6.7	4.1
0	1	1	6	15	6	5	4	2	0	0	0	0	0	0	0	0	0	0	0	0	1.125	73	24.1	25.9	8.2	8.8	168	203	13.6	14.9	13	16	23	25	60	66	7.8	7.9	96	102	2.3	2.6	161	176	135	140	3.8	5.1	2.2
0	1	1	4	14	6	5	3	3	0	0	0	0	0	0	0	0	0	0	0	0	1.04167	56	33.2	33.2	11.3	11.3	170	170	33.3	33.3	7	7	25	25	16	16	7.7	7.7	107	107	0.6	0.6	183	183	139	139	4.2	4.2	2.5
0	1	1	8	15	6	5	4	0	0	0	0	0	0	0	0	0	0	0	0	0	1.66667	81	28.4	28.4	8.2	9.1	49	49	9.2	9.2	19.3	19.3	13	13	81	81	7.8	7.8	115	115	4.22	4.22	103	103	142	142	5.5	5.5	1.2
0	1	1	5	15	6	5	4	0	0	0	0	0	1	0	0	0	0	0	0	1	1.83333	86	24.7	25	7.5	7.5	187	187	8.6	8.6	9	9	26	25	29	28	8.2	8.2	114	115	2.74	2.61	95	92	145	146	4	3.9	1.3
0	0	1	5	14	6	5	3	0	0	0	0	0	2	0	0	0	0	0	0	0	1.875	66	25.1	26.4	8.4	8.7	31	31	0.6	0.6	12	14	17	18	32	36	7.5	7.9	96	101	1.17	1.37	157	228	127	131	3.8	5.5	2.1
1	0	1	8	3	1	1	1	0	0	0	0	0	3	0	0	0	0	0	0	0	5.29167	46	31	31	9.8	9.8	523	523	39.8	39.8	6	6	29	29	8	8	8.1	8.1	104	104	0.3	0.3	104	104	139	139	4.1	4.1	1.4
0	0	1	17	3	1	1	1	1	0	0	0	0	0	0	0	0	0	0	0	0	1.875	34	31.2	40.4	10	12.2	11	64	0.5	1.6	14	22	12	18	14	22	5.2	5.9	98	110	1.1	2.3	32	157	134	138	3.4	5.5	3.2
0	1	4	6	15	6	5	4	5	0	0	0	0	4	0	0	0	0	0	0	0	5.20833	18	34.7	35	12.4	12.9	84	102	16.9	18.3	12	13	16	17	6	8	7	7.5	98	104	0.8	1.1	109	143	127	133	2.9	3.3	1.6
0	0	1	7	15	6	5	4	1	0	0	0	0	1	0	0	0	0	0	0	0	4.08333	87	36.6	36.6	11.9	11.9	148	148	10.5	10.5	10.5	10.5	23	23	31	31	7.1	7.1	108	108	1.03	1.03	161	161	138	138	3.1	3.1	1.2
1	0	1	11	7	4	1	2	3	0	0	0	0	0	0	0	0	0	0	0	0	1.79167	78	41.4	41.4	12.7	13.8	235	235	10.9	10.9	19	19	15	15	28	28	7.7	7.7	102	102	1.9	1.9	210	210	136	136	4.3	4.3	2.1
0	0	4	5	7	4	1	2	0	0	0	0	0	5	0	0	0	0	0	0	0	2.95833	77	42.6	42.6	13.7	13.7	235	229	14.4	14.4	10	13	18	21	43	53	7.7	8.8	113	117	1.7	2.2	169	265	142	147	3.6	3.8	0.9
1	0	1	6	8	3	1	4	0	0	0	0	0	1	0	0	0	0	0	0	0	7.625	58	29.2	29.2	9.3	9.3	160	160	4.8	4.8	10	10	20	20	16	16	7.3	7.3	115	115	0.58	0.58	119	119	145	145	3.9	3.9	0.8
0	0	1	4	15	6	5	4	2	0	0	0	0	0	0	0	0	0	0	0	0	2.95833	74	26	26	8.3	8.3	451	451	48.2	48.2	12	12	18	18	13	13	7.8	7.8	106	106	0.92	0.92	196	196	136	136	3.7	3.7	2.5
0	0	1	4	13	6	4	3	5	0	0	0	0	0	0	0	0	0	0	0	0	1.95833	53	38.5	38.5	12.5	12.5	167	167	10.4	10.4	11	10	22	22	25	25	8.4	8.4	111	111	0.81	0.81	96	96	141	141	3.7	3.7	1
1	1	1	13	3	1	1	1	4	0	0	0	0	0	0	0	0	0	0	0	0	4.08333	54	37	37	12.3	12.3	64	64	19	19	8	15.3	7	15	25	28	5.7	6	108	109	1.62	2.13	46	112	132	133	3.7	4.3	15.5
0	1	4	8	10	6	3	1	1	0	0	0	0	0	0	0	0	0	0	0	0	1.95833	44	32.7	32.7	10.5	10.5	191	205	11.1	11.1	18	19	17	20	22	22	8.1	8.2	111	110	3.3	3.3	109	109	144	144	4.8	4.8	2.6
0	1	1	7	15	6	5	4	0	0	0	0	0	0	0	0	0	0	0	0	0	5	43	24.9	24.9	8	8	160	163	8.5	8.08	12	12	23	23	18	19	8	8	98	99	0.98	1.2	132	134	133	133	4.1	4.2	2.3
0	0	1	2	14	6	5	3	1	0	0	0	0	0	0	0	0	0	0	0	0	5.33333	31	33.2	35.6	11.2	12.2	284	295	8.5	9	9	10.3	24	24	22	22	7.5	7.5	105	105	0.67	0.67	155	120	139	138	3.7	3.7	0.7
0	1	1	6	15	6	5	4	2	0	0	0	0	0	0	0	0	0	0	0	0	4.91667	59	38.7	40.7	12.5	13.1	75	87	18.3	18.3	15	15	22	22	123	123	10	9.8	114	113	2	2	213	213	147	147	5	4	1.5
0	1	1	7	10	5	1	4	0	0	0	0	0	0	0	0	0	0	0	0	1	1.75	70	16.2	16.2	6.2	6.2	16	16	0.7	0.7	11	11	21	21	16	16	8.1	8.1	72	72	0.9	0.9	127	127	108	108	3.2	3.2	1.3
0	1	1	9	9	5	2	2	3	0	0	0	0	0	0	0	0	0	0	0	0	6.83333	76	22.2	22.7	7	7.1	214	225	15.9	17.1	2	5	19	21	12	16	7.8	8	108	110	1	1.28	147	172	134	135	4.2	4.5	0.7
0	0	1	5	15	6	5	4	0	0	0	0	0	0	0	0	0	0	0	0	0	4.25	61	25.2	29.4	8.8	10.1	174	174	19.6	19.6	18	25	28	28	124	124	8.3	8.3	91	91	4.95	4.95	338	338	140	140	5.2	5.2	5.3
0	0	1	14	10	6	1	3	0	0	0	0	0	0	0	0	0	0	0	0	1	10.5	67	24.9	24.9	8.1	8.1	48	48	9.3	9.3	12	13	19	19	86	86	7.6	7.6	106	106	3.17	3.17	127	127	138	138	4.8	4.8	1.6
0	0	1	10	15	6	5	4	0	0	0	0	0	0	0	0	0	0	0	0	0	2	73	24.9	24.9	8	8	82	82	10.5	10.5	12	12.2	14	14	46	46	7.2	7.2	115	115	1.62	1.62	72	72	138	138	4.7	4.7	4
0	0	1	4	15	6	5	4	3	0	0	0	0	0	0	0	0	0	0	0	1	2.375	66	40.6	40.6	13.4	13.4	171	171	14.8	14.8	17	16.5	25	25	16	16	8.6	8.6	109	109	0.68	0.68	135	135	142	142	3.8	3.9	0.9
1	0	1	4	3	1	1	1	0	0	0	0	0	0	0	0	0	0	0	0	0	3.66667	70	28.7	28.7	8.8	8.8	353	353	9.9	9.9	14.7	17	48	54	14	14	9.1	9.4	82	84	0.7	0.7	104	112	144	145	3.4	3.8	0.9
0	0	1	5	13	6	4	3	5	0	0	0	0	0	0	0	0	0	0	0	0	7.54167	78	24.2	26	7.8	8.5	190	204	22.2	23.1	4	4	27	27	8	8	8.2	8.2	101	101	0.62	0.62	101	101	132	132	3.6	3.6	0.7
0	0	1	5	3	1	1	1	0	0	0	0	0	0	0	0	0	0	0	0	1	2.54167	75	35.9	35.9	12	12	202	202	7.7	7.7	11	10.4	26	26	16	16	8.6	8.6	100	100	0.9	0.9	95	95	138	138	3.8	3.8	1.3
0	0	1	5	6	4	1	1	1	0	0	0	0	0	0	0	0	0	0	0	0	1.08333	76	28.6	27.2	10	9.5	101	90	23.7	25.32	11	13	10	14	17	16	8.1	8.1	108	106	0.52	0.6	182	214	133	132	4	4.3	1.9
0	0	1	3	9	4	2	3	0	0	0	0	0	0	0	0	0	0	0	0	0	1.04167	76	30.5	25	10.3	8.4	314	295	16.52	20	4	4	37	38	12	12	8.1	7.9	107	106	0.66	0.57	195	227	145	145	3.7	3.5	0.7
0	1	1	11	8	4	2	2	0	0	0	0	0	0	0	0	0	0	0	0	0	4.45833	58	29.8	29.8	9.9	9.9	202	202	8.6	8.6	13	12.6	24	24	77	77	8.3	8.3	108	108	4.32	4.32	130	130	143	143	3.9	3.9	1.5
0	1	1	7	9	6	1	2	0	0	0	0	0	0	0	0	0	0	0	0	0	1.95833	70	27.6	27.6	9.4	9.4	86	86	9	9	15	14	17	17	114	114	7.7	7.7	109	109	4.75	4.75	93	93	136	136	5.2	5.2	1.7
0	1	1	5	15	6	5	4	3	0	0	0	0	0	0	0	0	0	0	0	0	4.41667	83	38.8	38.8	12.2	12.2	499	499	24.7	24.7	14	14	14	14	25	25	8.6	8.6	106	106	1.42	1.42	118	118	134	134	3.9	3.9	2.9
0	1	1	9	14	6	5	3	0	0	0	0	0	0	0	0	0	0	0	0	1	2.08333	77	35.7	36.5	12.2	12.2	169	215	7.7	8.2	11	23	10	22	61	91	7.2	7.6	97	98	3.14	4.37	77	102	124	131	4.5	6.9	2.5
0	1	2	4	15	6	5	4	2	0	0	0	0	0	0	0	0	0	0	0	0	2.25	57	36.7	36.7	11.7	11.7	200	200	17.1	17.1	10	15.9	23	27	27	30	7.8	8	93	99	1.57	2.19	176	186	128	132	4	4.9	0.8
0	1	2	2	11	4	4	3	0	0	0	0	0	0	0	0	0	0	0	0	0	1.75	64	44.7	44.7	14.8	14.8	174	174	15.2	15.2	14	13	28	28	16	16	8.5	8.5	100	100	1.65	1.65	122	122	137	137	4.7	4.7	1.7
0	1	1	5	6	4	1	1	0	0	0	0	0	0	0	0	0	0	0	0	1	17.8333	65	27.4	27.4	8.4	8.4	171	171	16.6	16.6	7	7	30	30	31	31	8.7	8.7	101	101	5.23	5.23	130	130	138	138	4.3	4.3	1.3
1	1	1	9	14	6	4	4	0	0	0	0	0	0	0	0	0	0	0	0	0	1.16667	91	36.7	36.7	12.5	12.5	211	211	3.6	3.6	20.4	17.7	18	18	54	54	9.3	9.3	111	111	1.7	1.7	77	77	145	145	4.3	4.3	2.7
0	1	1	3	14	6	4	4	0	0	0	0	0	0	0	0	0	0	0	0	0	4.125	85	33	33	11.1	11.1	180	180	15.4	15.4	6	5	28	28	23	23	8.7	8.7	107	107	0.72	0.72	104	104	140	140	3.7	3.7	1.5
0	1	1	6	8	5	1	2	3	0	0	0	0	0	0	0	0	0	0	0	0	3.375	76	28.9	32.9	9.9	11.2	136	152	9.77	11.3	7	9	22	24	45	45	8.7	8.7	105	111	1.15	1.15	177	177	139	142	3.8	3.8	1.4
0	0	1	4	15	6	5	4	0	0	0	0	0	0	0	0	0	0	0	0	0	2	48	30	32.7	10.7	11.7	115	141	10.9	13.9	10	12	5	9	25	36	6.2	6.8	114	122	0.3	1.13	113	130	133	137	3.1	4.1	1.8
0	0	2	4	15	6	5	4	0	0	0	0	0	0	0	0	0	0	0	0	0	1.66667	62	30.5	30.5	10.3	10.3	118	118	11.2	11.2	18	18	14	14	52	52	7.9	7.9	107	107	2.53	2.53	146	146	136	136	4.1	4.1	1.1
0	0	1	6	8	4	2	2	0	0	0	0	0	0	0	0	0	0	0	0	0	1.41667	56	30.8	30.8	10.4	10.4	183	183	21.8	21.8	18	18	13	13	81	81	7.8	7.8	113	113	3.73	3.73	160	160	146	146	2.4	2.4	0.7
1	1	1	9	3	1	1	1	2	0	0	0	0	0	0	0	0	0	0	0	0	2.95833	37	43.6	47.2	15.3	15.4	157	202	24.6	27.1	11	18	12	20	29	34	9.2	9.5	111	129	4.24	4.93	251	757	147	156	1.7	2.4	4.1
0	1	1	3	15	6	5	4	3	0	0	0	0	0	0	0	0	0	0	0	0	3.04167	46	30.1	30.1	10.2	10.2	399	399	17	17	11	11	19	19	20	20	8.4	8.4	106	106	1.25	1.25	145	145	136	136	4.3	4.3	0.6
0	1	1	3	9	4	2	3	0	0	0	0	0	0	0	0	0	0	0	0	0	1	34	27.1	28.1	9.1	9.2	147	156	10.7	11.7	8	11.9	19	23	12	17	6.7	7.1	109	113	1.04	1.66	102	154	138	141	3.3	3.9	0.8
0	1	1	4	6	1	1	4	0	0	0	0	0	0	0	0	0	0	0	0	0	2.66667	34	31.3	31.3	10.4	10.4	162	162	12	12	9	10.8	23	23	29	29	9.6	9.6	107	107	0.74	0.74	91	91	142	142	4	4	2
0	1	2	10	13	6	4	3	4	0	0	0	0	0	0	0	0	0	0	0	1	10.25	52	21	21	7.1	7.1	197	197	2.1	2.1	13.4	15	24	24	73	73	7.8	7.8	96	96	5.23	5.23	68	68	133	133	3.6	3.6	0.6
1	0	1	11	6	4	1	1	2	0	0	0	0	0	0	0	0	0	0	0	0	3.83333	91	32.3	32.3	10.2	10.2	94	94	16.8	16.8	18.5	19	21	21	79	79	7.3	7.3	91	91	2.92	2.92	82	82	127	127	3.8	3.8	6.1
1	1	1	11	3	1	1	1	4	0	0	0	0	0	0	0	0	0	0	0	0	1.20833	80	32.1	32.1	11	11	36	36	0.5	0.5	15.7	17	13	16	45	47	6.4	6.6	106	109	1.78	1.95	103	208	136	137	4	4.5	4
0	0	2	4	14	6	4	4	0	0	0	0	0	0	0	0	0	0	0	0	1	3.625	80	28.5	28.5	8.9	8.9	251	251	12.4	12.4	9	9	23	23	28	28	8.8	8.8	110	110	1.85	1.85	109	109	141	141	4.6	4.6	1.3
1	1	1	4	14	6	5	3	0	0	0	0	0	0	0	0	0	0	0	0	0	9.625	49	34.5	34.5	11.5	11.5	199	199	16.3	16.3	13	14	21	21	35	35	7.7	7.7	105	105	0.79	0.79	94	94	137	137	3.4	3.4	1.1
0	0	1	5	15	6	5	4	2	0	0	0	0	0	0	0	0	0	0	0	0	6.04167	68	32.5	32.5	11.5	11.5	105	105	4.3	4.3	14	14	17	17	3	3	6.2	6.2	103	103	0.44	0.44	125	125	132	132	3	4.1	2.4
0	0	1	6	9	5	1	3	0	0	0	0	0	0	0	0	0	0	0	0	0	3.83333	68	21.4	21.4	7.3	7.3	86	86	5	5	20.5	23.4	15	19	9	9	6.8	6.8	105	113	0.52	0.69	127	127	139	141	3.7	4.1	1
0	0	2	9	8	4	1	3	1	0	0	0	0	0	0	0	0	0	0	0	0	5.70833	86	32.9	32.9	10.9	10.9	28	28	0.3	0.3	11	14.4	18	18	65	65	8.3	8.3	104	104	2.11	2.11	182	182	135	135	4.4	4.4	2.6
0	1	1	3	15	6	5	4	0	0	0	0	0	0	0	0	0	0	0	0	0	6.41667	82	30.8	30.8	10.2	10.2	238	232	16.7	16.7	12	14	34	34	69	69	9.3	9.2	87	89	1.7	1.7	159	159	134	134	4.3	3.7	2
0	0	1	4	15	6	5	4	0	0	0	0	0	0	0	0	0	0	0	0	0	2.20833	67	36	36	8.2	8.5	189	190	26	26	13.4	13.9	24	24	14	14	7.6	7.6	98	100	1.3	1.3	208	208	132	132	2.4	2.7	0.9
0	1	1	5	15	6	5	4	0	0	0	0	0	0	0	0	0	0	0	0	1	1.75	65	24.4	24.4	8.4	8.4	211	211	11.2	11.2	17	16	21	21	68	68	8.7	8.7	102	102	12.88	12.88	108	108	138	138	3.6	3.6	1
0	1	1	2	15	6	5	4	0	0	0	0	0	0	0	0	0	0	0	0	0	2.91667	71	36.1	36.1	12.2	12.2	142	142	13.1	13.1	10.9	12	25	25	15	15	8.1	8.1	102	102	0.73	0.73	109	109	136	136	3.1	3.1	1
0	1	1	4	15	6	5	4	0	0	0	0	0	0	0	0	0	0	0	0	0	2.66667	51	37.7	37.7	12.8	12.8	171	171	17	17	13	12	25	25	76	76	7.9	7.9	98	98	2.75	2.75	46	46	134	134	3	3	1.6
0	1	1	6	14	6	4	4	0	0	0	0	0	0	0	0	0	0	0	0	0	4.54167	61	36.7	36.7	11.6	11.5	594	591	9.5	9.5	13.5	15	34	33	34	34	10	9.7	96	96	3.1	3.1	107	107	141	141	3.5	4.2	4.2
0	1	1	2	15	6	5	4	0	0	0	0	0	0	0	0	0	0	0	0	0	1.5	64	26.5	25	8.9	8.5	120	35	5	0.2	9	10	23	24.9	41	40	8	7.8	104	103	1	1.02	139	126	137	136	4.4	4	1.6
0	1	1	10	8	4	1	3	0	0	0	0	0	0	0	0	0	0	0	0	0	8.125	64	34.6	34.6	11.3	11.3	121	121	8.2	8.2	14.3	14.7	30	30	25	25	9.1	9.1	101	101	1.07	1.07	119	119	142	142	4.3	4.3	1.6
0	0	1	6	9	3	4	2	0	0	0	0	0	0	0	0	0	0	0	0	0	4.625	46	39.5	39.5	12.5	12.4	738	738	21.8	21.8	16	14.7	33	31	44	44	9.3	9.7	106	107	1.4	1.4	123	123	149	149	4.3	4.2	2
1	1	1	8	3	1	1	1	0	0	0	0	0	0	0	0	0	0	0	0	1	9.08333	60	27.8	27.8	9.6	9.6	126	126	21.1	21.1	13	14	22	24	59	60	7.4	7.5	95	96	1.55	1.6	246	377	130	131	4.2	4.3	1.9
0	1	1	3	15	6	5	4	0	0	0	0	0	0	0	0	0	0	0	0	0	2.45833	81	32.1	32.1	10.6	10.6	122	122	17.9	17.9	4	4	24	24	15	15	7.5	7.5	110	110	0.85	0.85	88	88	136	136	4.2	4.2	0.9
0	1	1	10	10	6	2	2	2	0	0	0	0	0	0	0	0	0	0	0	0	12.5417	57	38.2	38.2	12.7	12.7	250	244	19.3	19.3	20.9	20.5	20	20	84	84	8.6	8.7	94	94	5.7	5.7	100	100	136	136	5	5	2.5
0	1	1	2	15	6	5	4	1	0	0	0	0	0	0	0	0	0	0	0	0	2.375	71	28	28	9.2	9.2	122	122	16.3	16.3	12.6	12	25.6	25.6	14	14	7.6	7.6	107	107	0.56	0.56	127	127	142	142	3.8	3.8	1.6
0	0	1	3	14	6	5	3	0	0	0	0	0	0	0	0	0	0	0	0	0	1.41667	85	39.9	38.2	13.2	12.8	97	85	13.77	10.1	15	12	24	21	23	16	8.4	7.8	101	98	1.1	0.7	253	194	132	130	4.4	3.3	5.7
0	0	1	5	15	6	5	4	0	0	0	0	0	0	0	0	0	0	0	0	0	3.375	65	32.3	33.4	11.3	11.7	99	114	11.4	11.3	13	12	19	19	19	19	8.3	8.3	99	99	1.61	1.61	192	192	129	129	4.2	4.2	1.3
0	0	1	5	13	6	4	3	0	0	0	0	0	0	0	0	0	0	0	0	1	7.5	54	32.5	30.1	9.9	9.2	324	309	23.8	23.7	15	15	28	28	43	43	7.3	7.3	95	95	5.07	5.07	152	152	133	133	4.2	4.2	1.3
1	0	1	5	7	4	1	2	1	0	0	0	0	0	0	0	0	0	0	0	0	5.91667	58	28.4	28.4	9	9	75	75	6.7	6.7	11	11	20.1	20.1	17	17	7.1	7.1	94	94	1.03	1.03	577	577	123	123	3.9	3.9	1.6
0	1	1	5	14	6	5	3	0	0	0	0	0	0	0	0	0	0	0	0	0	2.58333	57	39.7	39.7	13.3	13.3	214	214	13.3	13.3	24	22	19	19	119	119	6.6	6.6	97	97	11.07	11.07	59	59	139	139	4.8	4.8	0.7
0	0	1	4	15	6	5	4	3	0	0	0	0	0	0	0	0	0	0	0	0	2	47	21.6	25.3	7.4	8.5	250	269	25.7	37	12	14.5	14	18	59	66	7	7.1	99	102	3.58	3.72	93	129	127	129	4.2	4.8	1.4
0	0	1	3	14	6	4	4	3	0	0	0	0	0	0	0	0	0	0	0	0	2.95833	66	32.4	33.6	10.9	11.3	172	172	19.2	20.1	15.1	16.1	14	14	28	28	7	7	107	107	0.97	0.97	113	113	133	133	3.9	3.9	2
0	0	1	9	15	6	5	4	4	0	0	0	0	0	0	0	0	0	0	0	0	1.33333	66	47.2	47.2	15.5	15.5	157	157	24.5	24.5	19	21	12	12	15	15	7.8	7.8	107	107	0.87	0.87	154	154	136	136	3.6	3.6	1.6
0	1	2	12	9	4	1	4	0	0	0	0	0	0	0	0	0	0	0	0	0	3.125	77	24.1	24.1	8	8	483	483	13.2	13.2	14	13	20	18	46	46	8.2	8.2	108	108	5.2	5.2	147	147	139	139	5.8	5.8	1.5
0	1	1	2	15	6	5	4	0	0	0	0	0	0	0	0	0	0	0	0	0	4.33333	84	29.2	29.2	9.2	9.2	235	235	27	27	8	6	36	35	73	73	8.3	8.2	105	101	1.6	1.6	159	159	135	135	4.3	5	0.5
0	1	1	5	15	6	5	4	0	0	0	0	0	0	0	0	0	0	0	0	0	1.91667	86	37.1	37.1	11.6	11.6	180	182	16.4	16.4	18.5	18.3	24	22	22	22	9.5	10	99	109	1.6	1.6	100	100	139	139	4.9	4.7	4.6
0	1	1	9	7	4	1	2	0	0	0	0	0	0	0	0	0	0	0	0	1	4.29167	56	35.4	40	11.6	13.6	316	296	9.1	9.7	14	15	20	23	23	28	7.8	8.2	105	107	1.43	1.54	105	132	139	141	3.5	3.9	1.5
0	1	1	5	15	6	5	4	1	0	0	0	0	0	0	0	0	0	0	0	0	5.125	69	29.8	29.8	10.3	10.3	43	43	10.1	10.1	5	10	18	18	17	17	7.3	7.3	111	111	0.65	0.65	125	125	133	133	3.7	3.7	1.1
0	1	1	5	15	6	5	4	0	0	0	0	0	0	0	0	0	0	0	0	0	1.08333	69	25.9	25.9	8.1	8.1	480	480	23.2	23.2	11.4	11	26	26	29	29	8.8	8.8	93	93	1.35	1.35	146	146	130	130	5.1	5.6	4.7
0	1	1	4	15	6	5	4	0	0	0	0	0	0	0	0	0	0	0	0	0	3.66667	81	32.5	32.5	10.8	10.8	137	137	8.5	8.5	7	7	20	20	26	26	7.5	7.5	114	114	1.72	1.72	104	104	138	138	4.4	4.4	1.8
0	1	1	2	15	6	5	4	1	0	0	0	0	0	0	0	0	0	0	0	0	1.625	62	33	33.3	10.8	10.9	144	144	1.6	1.2	9	11	17	15	28	28	8	7.9	115	118	1.43	1.31	78	137	142	143	3.5	3.7	1.6
0	0	1	9	8	4	2	2	0	0	0	0	0	0	0	0	0	0	0	0	0	6.20833	54	31.5	31.5	10.3	10.3	354	354	22.1	22.1	13	14	16	18	19	21	5.8	6.1	97	98	3.31	3.33	52	71	126	128	3.4	3.5	0.6
0	0	1	4	14	6	4	4	0	0	0	0	0	0	0	0	0	0	0	0	0	12	71	37	37	11.5	11.5	95	95	4	4	12	16	34	34	53	53	8.8	8.8	105	105	0.85	0.85	179	179	152	152	3.8	3.8	1.2
0	0	1	4	12	5	4	3	4	0	0	0	0	0	0	0	0	0	0	0	0	7.54167	63	18.1	27.4	6.4	9.6	196	196	7.8	7.8	19	21	12	14	28	33	6.1	7.1	101	108	0.68	0.85	322	367	128	134	4.1	4.9	5.2
0	0	1	4	12	6	4	2	4	0	0	0	0	0	0	0	0	0	0	0	0	2.45833	62	30.6	30.6	9.5	9.5	358	358	11.4	11.4	9	10	14	17	63	105	8.5	9.1	110	116	1.91	2.35	131	194	135	142	4.4	4.6	1.5
1	0	1	9	6	4	1	1	5	0	0	0	0	0	0	0	0	0	0	0	1	2.58333	71	38.7	38.7	12.1	12.1	213	213	24.2	24.2	13.5	14	15.1	15.1	63	63	8	8	110	110	2.57	2.57	245	245	137	137	5.1	5.1	0.8
0	0	1	3	8	1	4	3	3	0	0	0	0	0	0	0	0	0	0	0	0	2.54167	83	32.3	32.3	9.8	10.4	482	506	11.8	11.8	11	11.7	20	21	43	43	8.3	8.4	102	102	2.6	2.6	107	107	134	134	4.1	4.2	1
0	0	1	3	15	6	5	4	0	0	0	0	0	0	0	0	0	0	0	0	0	1.58333	46	28.7	28.7	9.3	9.3	321	321	22.9	22.9	14.4	20.9	19	27	40	40	7.8	8.4	96	102	1.31	2.17	149	294	136	137	4.1	4.1	1.1
0	0	1	2	14	6	4	4	0	0	0	0	0	0	0	0	0	0	0	0	0	2.25	58	18.5	23	6	7.9	239	239	14.6	14.6	21	22	19	22	6	8	6.9	7	106	114	1.29	1.41	67	102	148	151	2.5	3.3	1.4
0	0	1	6	7	4	1	2	0	0	0	0	0	0	0	0	0	0	0	0	0	5.08333	83	20.4	20.4	6.2	6.2	261	261	14.2	14.2	16	15.9	24	24	19	19	7.6	7.6	97	97	0.79	0.79	325	325	135	135	3.6	3.6	3.1
0	0	1	5	15	6	5	4	0	0	0	0	0	0	0	0	0	0	0	0	0	1.125	72	33.7	33.7	10.7	10.6	582	594	21.3	21.3	8	8	24	25	19	19	9.1	9	104	104	0.9	0.9	116	116	134	134	3.3	4	1.1
0	0	1	7	6	4	1	1	0	0	0	0	0	0	0	0	0	0	0	0	0	2.45833	64	33.9	32.9	10.4	10.1	366	354	7.6	5.5	11	24	12	21	53	53	8.4	8.4	106	110	2.57	2.84	281	304	137	139	4.1	4.5	4.1
0	0	2	3	9	4	2	3	4	0	0	0	0	0	0	0	0	0	0	0	0	2.95833	21	41.5	41.5	13.7	13.5	401	400	22.3	22.3	19	16	27	26	10	10	8.2	7.9	90	89	1.6	1.6	571	571	131	131	3.1	3.4	1.7
0	1	1	11	7	4	1	2	1	0	0	0	0	0	0	0	0	0	0	0	0	4.95833	69	28.8	29.3	9.7	9.8	301	326	14.8	17	15	25	6	13	61	66	6.4	6.8	112	114	3.52	3.76	237	400	140	141	4.4	4.7	0.8
0	1	1	5	11	6	4	1	0	0	0	0	0	0	0	0	0	0	0	0	0	7.95833	69	23.6	23.6	7.9	8	224	228	17.5	17.41	8	11	14	18	86	90	7	7.1	107	110	1.6	1.6	88	164	132	134	5.4	5.9	1.6
1	1	2	9	6	4	1	1	0	0	0	0	0	0	0	0	0	0	0	0	0	3	79	28.9	28.9	8.8	8.8	344	344	14.6	14.6	13	13	20	20	39	39	8.5	8.5	115	115	1.04	1.04	253	253	147	147	4.2	4.2	6.2
0	1	1	11	6	3	1	2	1	0	0	0	0	0	0	0	0	0	0	0	0	10.125	69	37.2	38.5	11.8	12.6	225	237	14.7	17.2	17	23.4	11	15	33	35	6.8	8	103	107	2.13	4.49	178	296	139	143	3.5	4.1	11.1
0	1	1	2	10	6	1	3	0	0	0	0	0	0	0	0	0	0	0	0	0	1.04167	71	39.5	39.5	13.9	13.9	343	344	5.7	5.7	14.5	17	25	26	26	26	5.2	8.1	98	99	3	3	198	198	136	136	4.3	4.3	1.3
0	0	1	2	14	6	4	4	0	0	0	0	0	0	0	0	0	0	0	0	0	8.20833	77	34.7	34.7	11.2	11	146	115	13.4	13.4	8	7	18	16	8	8	7.9	7.8	113	112	0.6	0.6	153	153	140	140	3.7	3.5	1.6
0	0	1	2	13	5	5	3	0	0	0	0	0	0	0	0	0	0	0	0	0	3.83333	65	29.4	29.4	9.8	9.8	225	225	22.8	22.8	13	11	19	19	29	29	8	8	111	111	0.87	0.87	109	109	139	139	4	4	1.7
1	0	1	10	3	1	1	1	7	0	0	0	0	0	0	0	0	0	0	0	0	10.8333	68	39.5	39.9	12.6	13.1	184	187	11.9	15.2	11.8	13	21	23	45	52	7.8	8	110	112	1.48	1.95	82	103	146	147	2.6	2.6	2.4
0	0	1	8	15	6	5	4	0	0	0	0	0	0	0	0	0	0	0	0	1	2	64	29.4	29.4	9.7	9.7	239	239	9.7	9.7	13	14	25	25	25	25	8.4	8.4	98	98	1.5	1.5	95	95	135	135	3	3	1.3
0	0	1	4	15	6	5	4	1	0	0	0	0	0	0	0	0	0	0	0	0	1.25	63	28.3	28.3	9.4	9.4	89	89	19.9	19.9	12	12.5	18	18	23	23	7.6	7.6	113	113	1.05	1.05	155	155	142	142	4	4	1.4
1	0	1	5	6	4	1	1	1	0	0	0	0	0	0	0	0	0	0	0	1	13.1667	85	30.7	38.8	9.9	13	271	353	6.8	13.34	8	12	20	24	28	41	7.6	8.5	105	111	0.93	1.84	115	182	136	143	4.3	5.4	1.6
0	0	1	5	10	5	2	3	2	0	0	0	0	0	0	0	0	0	0	0	0	4.91667	91	36.5	36.5	12	12	164	164	11	11	14	14.2	10	10	77	77	7.5	7.5	109	109	5.73	5.73	102	102	131	131	5	5	1.8
0	1	1	6	14	5	5	4	0	0	0	0	0	0	0	0	0	0	0	0	0	1.83333	66	36.9	36.9	12	12	223	223	21	21	16.8	18	29	29	20	20	8.8	8.8	103	103	0.55	0.55	117	117	145	145	3.6	3.6	1.1
0	1	2	6	7	4	1	2	0	0	0	0	0	0	0	0	0	0	0	0	0	3.875	47	21.7	25.7	7.1	8.3	74	86	21.4	21.9	13	15	19	19	18	18	8.2	8.4	118	118	0.71	0.74	119	125	148	148	4	4.2	1
0	1	1	6	15	6	5	4	0	0	0	0	0	0	0	0	0	0	0	0	0	4.79167	80	27	27	9.3	9.3	155	155	9.4	9.4	10.2	11	23	23	31	31	8.4	8.4	98	98	0.95	0.95	114	114	132	132	4.1	4.1	2.2
0	0	1	9	15	6	5	4	0	0	0	0	0	0	0	0	0	0	0	0	0	6.70833	37	24.9	27.1	8.2	8.8	197	246	9.8	14.39	16.4	21	21	25	12	12	8.6	9	105	106	1.27	1.35	168	157	142	144	3.3	3.8	1.1
0	0	4	3	11	6	2	3	0	0	0	0	0	0	0	0	0	0	0	0	1	2.04167	62	28.4	28.4	9	9	194	194	7.9	7.9	8	9	20	19	30	29	8.3	8.1	111	108	2.8	2.81	108	117	141	138	4.7	4.6	1.6
0	1	2	9	8	4	1	3	3	0	0	0	0	0	0	0	0	0	0	0	0	6.125	62	27.7	27.9	9.4	9.6	174	174	10.8	10.8	12	14	17	19	49	51	7.5	8.3	100	105	3.65	4.66	141	150	135	136	5.3	5.5	1.6
0	0	1	2	15	6	5	4	0	0	0	0	0	0	0	0	0	0	0	0	0	3.125	80	32.6	32.6	10.3	10.3	158	149	21.6	21.6	13	12.2	23	22.7	42	42	9.7	9.3	122	117	1.1	1.1	116	116	150	150	4.1	4	0.9
0	1	1	5	10	5	2	3	5	0	0	0	0	0	0	0	0	0	0	0	0	3.04167	76	29.1	31.1	9.1	9.8	171	183	7.4	8.4	9	8	28	28	28	33	8.6	8.5	110	111	1.43	1.9	126	148	141	145	3.5	3.3	0.6
0	1	1	8	14	6	4	4	4	0	0	0	0	0	0	0	0	0	0	0	0	1.875	85	25	25	8.4	8.4	88	88	7.1	7.1	10	9	24	24	35	35	8.3	8.3	106	106	2.43	2.43	122	122	136	136	3.7	4.1	1.1
0	1	1	7	13	6	4	3	0	0	0	0	0	0	0	0	0	0	0	0	0	1.79167	73	29.5	29.5	9.9	9.9	123	123	7.5	7.5	16.5	18.1	17	20	76	77	8.6	8.8	99	101	2.01	2.08	60	162	130	133	5.5	5.7	6.4
0	0	1	3	13	6	4	3	4	0	0	0	0	0	0	0	0	0	0	0	1	2.25	49	24	24	8.2	8.2	141	141	0.2	0.2	11	10	23	23	13	13	6.9	6.9	110	110	0.59	0.59	183	183	142	142	2.9	2.9	0.9
0	0	2	6	15	6	5	4	0	0	0	0	0	0	0	0	0	0	0	0	0	2.08333	66	35.3	35.3	11.4	11.4	136	136	10.4	10.4	14	13	24.1	24.1	56	56	8.3	8.3	103	103	4.64	4.64	91	91	139	139	3.9	3.9	0.9
0	1	1	6	13	5	4	4	0	0	0	0	0	0	0	0	0	0	0	0	0	2.79167	65	27	27	8.9	8.9	77	77	1.1	1.1	11.5	11	25	25	16	16	8.1	8.1	105	105	0.6	0.6	125	125	139	139	3.5	3.5	1.6
0	1	1	5	13	6	4	3	0	0	0	0	0	0	0	0	0	0	0	0	0	3.25	65	29	30.1	9.1	9.3	71	66	4.6	3.2	10.9	11	23	24	21	20	8	8.2	115	114	1.15	1.24	84	88	147	146	4.3	4.2	2.7
0	1	1	5	15	6	5	4	0	0	0	0	0	0	0	0	0	0	0	0	0	3.95833	86	28.6	28.6	8.6	8.6	305	305	15	15	10	8	26	26	15	15	8.3	8.3	107	107	1.15	1.15	84	84	140	140	4.5	4.5	2.3
0	1	1	3	15	6	5	4	0	0	0	0	0	0	0	0	0	0	0	0	0	1.04167	85	31	31	10	10	313	313	10.4	10.4	7	7	24	24	11	11	8.1	8.1	110	110	1.07	1.07	85	85	139	139	4.5	4.5	1.2
0	0	1	2	9	4	1	4	0	0	0	0	0	0	0	0	0	0	0	0	0	2.70833	70	29.7	29.7	9.8	9.8	146	143	10.1	10.1	13.8	12.8	27	25	24	24	9	8.8	98	97	0.7	0.7	299	299	134	134	4.2	4	1.4
0	0	1	7	15	6	5	4	1	0	0	0	0	0	0	0	0	0	0	0	0	1.91667	91	33.2	33.2	11	11	63	63	26.9	26.9	14.6	16.4	16	18	28	29	7.2	7.4	112	116	0.8	0.68	107	134	141	145	3.8	3.9	5.2
0	0	2	4	15	6	5	4	0	0	0	0	0	0	0	0	0	0	0	0	1	5.20833	81	28.8	28.8	9.6	9.6	153	153	7.6	7.6	20	19.9	18	18	46	46	7.8	7.8	104	104	7.02	7.02	88	88	139	139	3.4	3.4	2
0	0	1	8	13	6	4	3	3	0	0	0	0	0	0	0	0	0	0	0	0	1.45833	72	32.6	32.8	10.2	10.3	283	263	46.83	45	15.3	11	21	19	18	12	8.4	8.2	109	108	2.8	2.5	98	91	141	139	4	3.8	3.2
0	0	1	9	9	4	1	4	2	0	0	0	0	0	0	0	0	0	0	0	0	5.25	71	41.4	41.4	14.4	14.4	103	103	14	14	10	10	26.1	26.1	23	23	8.7	8.4	104	104	1.6	1.6	260	260	142	142	3.5	3.5	1.8
0	0	1	9	12	5	4	3	4	0	0	0	0	0	0	0	0	0	0	0	0	2.5	75	29.7	32.6	9.9	10.9	194	236	15	18.4	15.9	20	25	27	36	40	7.5	8.8	96	99	1.81	2.1	119	150	138	145	3.5	3.6	4.3
0	1	1	3	15	6	5	4	0	0	0	0	0	0	0	0	0	0	0	0	0	2.875	65	24.9	24.9	8.1	8.1	231	231	3.3	3.3	12.7	14.2	28	28	11	11	7	7	104	104	0.75	0.75	324	324	141	141	3.7	3.7	2.3
0	1	1	6	14	6	4	4	0	0	0	0	0	0	0	0	0	0	0	0	0	3.5	65	31	31	9.8	9.8	180	180	13.2	13.2	12	12.5	23	23	45	45	8.5	8.5	109	109	1.82	1.82	230	230	140	140	4.4	6.2	1.5
0	0	1	10	6	4	1	1	0	0	0	0	0	0	0	0	0	0	0	0	0	8.70833	85	28	28	9.1	9.1	135	135	6.3	6.3	13	14.1	21	21	45	45	8.7	8.7	107	107	2.99	2.99	137	137	138	138	4.6	4.6	2.3
0	0	2	6	8	4	1	3	3	0	0	0	0	0	0	0	0	0	0	0	0	9.70833	83	35.4	35.4	10.5	10.5	187	187	14.7	14.7	16	16	22	22	94	94	7.3	7.3	129	129	1.2	1.2	88	88	166	166	3.8	3.8	0.7
0	1	2	6	14	6	5	3	0	0	0	0	0	0	0	0	0	0	0	0	1	1.33333	63	27.5	30	8.8	9.7	195	210	3.9	4.7	4	9	27	33	50	60	8.9	9.3	102	104	3.8	4.52	199	242	143	143	4	4.6	1
0	0	1	9	6	4	1	1	2	0	0	0	0	0	0	0	0	0	0	0	0	2.91667	78	25.6	25.6	8.4	8.4	142	142	6.4	6.4	15.2	14	23	23	20	20	7.8	7.8	111	111	0.54	0.54	117	117	141	141	3.8	3.8	1.6
0	1	1	7	10	5	2	3	0	0	0	0	0	0	0	0	0	0	0	0	1	12.75	57	29.4	29.4	9.8	9.8	116	116	13.9	13.9	15.7	23.4	18	21	75	98	9.1	9.7	93	98	10.29	14.62	68	122	134	137	5.6	8.6	2.7
1	0	2	9	7	4	1	2	0	0	0	0	0	0	0	0	0	0	0	0	1	10.4583	85	31.4	31.4	10.2	10.2	136	136	23.5	23.5	18	18.9	20	20	55	55	9.8	9.8	94	94	5.36	5.36	132	132	131	131	4.1	4.1	5
0	1	1	11	9	4	1	4	4	0	0	0	0	0	0	0	0	0	0	0	0	5.70833	64	40	40.8	12.6	12.7	186	217	17.2	24.8	14	16	10	13	58	58	8.1	8.1	99	108	3.57	3.57	276	276	129	133	4.7	5.8	5.7
0	1	1	3	15	6	5	4	0	0	0	0	0	0	0	0	0	0	0	0	0	1.66667	59	41.2	41.2	13.6	13.6	221	221	5.4	5.4	7	8	20	20	53	53	8	8	101	101	0.93	0.93	134	134	130	130	4.9	4.9	0.8
0	1	1	4	14	5	5	4	0	0	0	0	0	0	0	0	0	0	0	0	0	1.66667	74	39.3	39.3	13.6	13.5	159	157	5.6	5.6	8	8	31	31	11	11	8.6	8.8	103	102	1	1	171	171	139	139	4	5	1.1
0	1	2	6	11	6	1	4	0	0	0	0	0	0	0	0	0	0	0	0	0	6.125	67	34.3	33	11.5	11	133	113	15.4	14	9	8	29	27	12	7	7.9	7.6	104	101	1.1	0.79	209	164	138	136	4.9	4.5	3.4
0	0	1	4	13	6	4	3	0	0	0	0	0	0	0	0	0	0	0	0	0	4.33333	64	34.7	45.1	11.7	15.1	242	287	17.1	22.6	10	12	27	30	31	32	7.9	8.1	101	104	0.8	0.64	86	170	137	142	4.3	4.6	0.7
0	0	2	5	14	6	4	4	3	0	0	0	0	0	0	0	0	0	0	0	0	2.04167	58	32.3	33	10.9	10.9	297	339	10.4	16.1	14.7	25	18	24	15	26	7	7.4	101	108	0.95	2.03	213	264	138	139	3.6	5.4	0.8
1	0	1	9	5	3	1	1	6	0	0	0	0	0	0	0	0	0	0	0	0	3.29167	86	32.2	32.2	9.8	9.8	308	308	13.4	13.4	14	14	14	14	37	37	7.7	7.7	110	110	1.33	1.33	128	128	135	135	4.2	4.2	2.6
0	0	1	5	13	5	4	4	0	0	0	0	0	0	0	0	0	0	0	0	0	3.08333	91	39.8	42.1	12.9	12.9	56	56	29.1	30.9	16	16.4	19.8	19.8	37	43	7.2	7.2	111	111	1.47	1.88	57	63	144	144	4.4	4.4	3.3
0	1	1	6	12	5	4	3	0	0	0	0	0	0	0	0	0	0	0	0	0	6.45833	87	37	38.9	12.3	13	47	73	1.3	4.8	22	26.4	22	26	14	14	7.9	8.6	90	93	1.28	1.28	132	190	134	135	3.8	4	4.4
0	1	1	5	15	6	5	4	0	0	0	0	0	0	0	0	0	0	0	0	0	1.125	57	34.8	34.8	12.3	12.3	194	184	34.9	34.9	10	9.8	20	18	27	27	8.1	8.1	100	101	2.4	2.4	86	86	131	131	4.7	4.6	2.9
1	1	1	6	15	6	5	4	0	0	0	0	0	0	0	0	0	0	0	0	0	2.75	74	27.7	27.7	9.4	9.4	125	125	11.6	11.6	13	14.4	22	22	10	10	7.5	7.5	102	102	0.53	0.53	113	113	133	133	3.6	3.6	1.8
0	0	1	2	15	6	5	4	0	0	0	0	0	0	0	0	0	0	0	0	0	1.54167	38	43.9	42.2	14.6	14.1	243	225	12.3	10.2	14	15.1	25	25	27	27	8.1	8.1	91	91	1.86	1.86	206	206	131	131	3.1	3.5	2.2
0	0	1	2	14	6	5	3	2	0	0	0	0	0	0	0	0	0	0	0	0	1.5	38	26.1	26.1	8.8	8.8	156	156	8.7	8.7	13	13	27	27	19	19	7	7	95	95	1.12	1.12	242	242	133	133	2.4	3.4	1.6
0	1	1	4	10	5	3	2	2	0	0	0	0	0	0	0	0	0	0	0	0	1.66667	68	37.4	37.4	11.8	11.8	256	256	14.8	14.8	9.1	10	26	26	33	33	8.6	8.6	122	122	0.8	0.8	135	135	158	158	4.6	4.6	1.9
0	0	1	2	14	6	4	4	0	0	0	0	0	0	0	0	0	0	0	0	0	2.375	83	32.6	32.1	10.5	10.4	188	217	11.22	12.1	12	13	19	19	31	30	7.7	7.8	113	112	0.93	0.93	174	138	144	142	4.2	4	1.6
0	1	1	8	7	4	1	2	4	0	0	0	0	0	0	0	0	0	0	0	1	7.375	64	36.3	39.1	12.2	13.4	109	103	19.9	20.3	9	11	16	18	18	25	6.7	6.8	111	111	1.71	2.05	177	138	139	138	4.1	4.2	1.2
0	1	1	8	5	3	1	1	0	0	0	0	0	0	0	0	0	0	0	0	0	7.70833	63	21.5	23.2	7.3	7.6	118	143	11.8	11.8	15.3	15	21	21	21	21	8.2	8.2	99	99	1.29	1.29	130	130	133	133	4	4	3.1
0	1	1	9	12	6	2	4	7	0	0	0	0	0	0	0	0	0	0	0	0	4.125	77	32.9	35.8	11	12.1	58	79	6.1	10.3	9	10.2	18	19	71	75	7.8	7.9	113	114	2.43	2.64	65	73	142	143	3.7	3.9	1.5
1	0	1	10	3	1	1	1	3	0	0	0	0	0	0	0	0	0	0	0	0	1	72	37.9	37.9	13	13	229	229	10.3	10.3	39	43	5	5	53	57	5.6	5.8	92	102	2.74	3.14	86	341	134	136	5.9	6.9	13.8
1	1	1	5	3	1	1	1	2	0	0	0	0	0	0	0	0	0	0	0	0	13.8333	77	26.2	26.2	8.9	8.9	153	153	9.6	9.6	12	15	47	47	24	24	8.4	8.4	78	78	0.9	0.9	215	215	135	135	3.5	3.5	1.3
0	0	1	5	8	1	4	3	4	0	0	0	0	0	0	0	0	0	0	0	1	4.95833	89	24.7	26.3	6.5	7.2	378	381	21.19	21.46	17	18.1	17	17	73	73	8.1	8.1	105	105	3.85	3.85	152	152	134	134	5.4	5.6	1.6
0	1	2	6	15	6	5	4	1	0	0	0	0	0	0	0	0	0	0	0	1	4.70833	59	25.3	23	8.1	7.4	121	59	12.6	11.7	13	14	21	19	33	35	9.3	9.5	107	110	3.56	3.48	102	134	132	138	3.2	3.1	1.6
1	0	1	12	3	1	1	1	4	0	0	0	0	0	0	0	0	0	0	0	0	1.04167	41	25	32.4	8.8	11	136	136	1.9	1.9	23	23	8	8	7	7	5.5	5.5	113	113	0.77	0.81	69	87	133	147	3.2	3.4	18
0	0	2	8	15	6	5	4	0	0	0	0	0	0	0	0	0	0	0	0	0	1.625	73	25.9	25.9	8.5	8.5	114	114	14.2	14.2	18	17.9	16	16	33	33	8.2	8.2	107	107	1.62	1.62	138	138	137	137	4.9	4.9	1.2
0	0	1	7	3	1	1	1	0	0	0	0	0	0	0	0	0	0	0	0	0	5.33333	54	31.6	31.6	10.3	10.3	115	116	38.9	38.9	17	17.2	20	18	87	87	7.9	8.1	99	97	6.7	6.7	152	152	131	131	5.6	6.2	1.3
1	1	1	9	14	6	5	3	0	0	0	0	0	0	0	0	0	0	0	0	0	2.45833	73	40.5	40.5	13	13	126	126	27	27	21	23	14	14	55	55	9.1	9.1	109	109	4.64	4.64	149	149	142	142	4.1	4.1	2.4
0	1	1	5	15	6	5	4	0	0	0	0	0	0	0	0	0	0	0	0	0	2.54167	91	33.5	33.5	11	11	186	185	25.8	25.8	13	11	19	19	34	34	8.2	8.1	107	108	2.3	2.3	118	118	137	137	4.1	4.1	0.8
0	1	1	8	14	6	5	3	4	0	0	0	0	0	0	0	0	0	0	0	0	3.58333	72	34.1	34.1	11.4	11.4	147	147	36.9	36.9	13.5	21.9	11	16	23	26	7.2	7.8	104	106	2.52	2.68	124	176	134	136	3.1	4.1	6.7
1	1	1	9	6	4	1	1	1	0	0	0	0	0	0	0	0	0	0	0	0	18	77	30.1	30.1	9.1	9.1	353	353	14.3	14.3	12.1	15	13	18	55	58	8.7	9.2	110	112	4.73	5.07	133	142	140	141	5.4	6.7	1.2
0	1	1	3	15	6	5	4	2	0	0	0	0	0	0	0	0	0	0	0	0	1.95833	53	27.5	28.5	9.2	9.3	261	324	0.7	1.2	13.4	17.6	19	22	22	24	8	8.3	100	102	0.56	0.68	90	121	134	135	3.1	3.7	1.3
0	0	1	3	10	4	2	4	2	0	0	0	0	0	0	0	0	0	0	0	0	2.70833	83	24.1	26	7.8	8.4	342	349	11.3	12.2	9	9	26	26	16	16	7.3	7.3	101	101	0.61	0.61	128	128	136	136	3.5	3.5	0.49
0	1	2	8	3	1	1	1	2	0	0	0	0	0	0	0	0	0	0	0	0	10.7083	51	39	39	13.2	13	95	89	1.1	1.1	16.3	15	19	16.1	24	24	8.7	8.5	115	111	0.4	0.4	133	133	146	146	4.6	3.9	1.8
0	1	2	6	15	6	5	4	3	0	0	0	0	0	0	0	0	0	0	0	1	1.25	64	33	33	10.8	10.8	86	86	17.4	17.4	7	12	19	19	50	50	8	8	107	107	2.24	2.24	317	317	134	134	4.9	4.9	1.6
0	0	2	5	14	6	4	4	0	0	0	0	0	0	0	0	0	0	0	0	0	1.33333	91	37.4	38.1	12.4	12.9	244	244	3.84	0.24	15	15	23	25	20	13	9.2	9.3	99	99	1.13	1.24	171	144	134	136	3.6	4	2.6
0	1	1	6	7	4	1	2	0	0	0	0	0	0	0	0	0	0	0	0	0	25.5417	70	40.8	40.8	13.4	13.4	151	151	13.4	13.4	16	14	31	31	22	22	7.7	7.7	99	99	1.31	1.31	138	138	142	142	3.7	3.7	0.7
0	1	1	9	10	6	1	3	0	0	0	0	0	0	0	0	0	0	0	0	0	5.66667	79	27	27	9.5	9.5	170	170	8.1	8.1	11	13	21	21	60	70	7.6	7.6	106	108	1.91	1.93	103	180	137	139	4.5	5	1.5
0	1	1	4	13	6	4	3	0	0	0	0	0	0	0	0	0	0	0	0	0	2.04167	79	32.9	32.9	10.9	10.9	602	602	17.6	17.6	11	10.6	16	16	82	82	9	9	113	113	3.11	3.11	88	88	138	138	5.9	6.2	1.3
1	1	1	9	14	6	4	4	0	0	0	0	0	0	0	0	0	0	0	0	0	2.25	84	26.9	26.9	7.9	7.9	113	113	112.9	112.9	6	9	18	21	44	56	8	8.1	105	109	2.84	3.35	148	164	137	138	4.7	4.8	1.9
0	1	1	5	3	1	1	1	4	0	0	0	0	0	0	0	0	0	0	0	0	2.75	64	34.6	34.6	10.6	10.6	294	294	26.7	26.7	10	10	18	19	23	23	7.3	7.3	107	106	1.54	1.7	3	3	133	133	4.1	4.1	0.7
0	1	1	2	10	5	3	2	0	0	0	0	0	0	0	0	0	0	0	0	0	1.58333	61	38.9	38.9	12.5	12.5	313	313	17.8	17.8	12.9	20	10	20	24	24	9	9	108	114	1.38	1.38	198	198	139	141	3.9	4.6	2.5
0	0	2	2	14	6	5	3	0	0	0	0	0	0	0	0	0	0	0	0	0	9.875	48	32.1	32.1	10.9	10.9	125	125	9.9	9.9	11	11.3	20	20	11	11	7.9	7.9	95	95	0.72	0.72	99	99	125	125	2.8	2.8	0.7
0	0	1	10	9	4	1	4	0	0	0	0	0	0	0	0	0	0	0	0	0	1.66667	88	30.2	30.2	10	10	28	28	1.8	1.8	11	11.9	17	17	81	81	7.7	7.7	116	116	2.23	2.23	124	124	143	143	5.1	5.1	1
0	1	2	12	3	1	1	1	2	0	0	0	0	0	0	0	0	0	0	0	0	30.375	83	28.2	28.2	9.3	9.3	108	108	7.2	7.2	20	19.3	14	14	70	70	6.8	6.8	114	114	6.26	6.26	91	91	144	144	5.2	5.2	4.7
1	1	1	10	14	6	4	4	0	0	0	0	0	0	0	0	0	0	0	0	0	2.79167	69	24.3	24.3	8.1	8.1	105	105	18.3	18.3	13.1	13	24	24	31	31	7.7	7.7	99	99	0.64	0.64	77	77	136	136	3.5	3.5	1.7
0	1	1	7	6	4	1	1	3	0	0	0	0	0	0	0	0	0	0	0	0	6.45833	76	25.3	27	8.7	8.9	216	268	7.2	7.9	11	19	15	25	26	45	7	7.7	97	102	1.39	2.19	216	263	131	135	2.6	6.8	3.7
0	1	1	6	7	4	1	2	0	0	0	0	0	0	0	0	0	0	0	0	0	2.375	77	22.7	24.5	7	7.5	470	505	9.8	17	7	10.7	23	27	24	35	8.6	9	99	106	0.74	1.17	100	162	134	138	4	4.4	1
0	1	1	10	8	4	2	2	0	0	0	0	0	0	0	0	0	0	0	0	0	1.45833	77	24.6	24.6	7.7	7.7	411	411	17	17	12	11	24	24	32	32	8.8	8.8	106	106	0.8	0.8	185	185	138	138	4.7	4.7	1.1
1	1	1	3	14	6	5	3	0	0	0	0	0	0	0	0	0	0	0	0	1	1.375	89	28.2	26.8	9.1	8.6	127	128	11.7	10.51	7	7	33	31	23	23	10	9.7	94	92	2.28	2.42	208	166	134	129	4.7	4.1	1.4
0	1	1	5	6	4	1	1	0	0	0	0	0	0	0	0	0	0	0	0	0	16.7917	75	27.5	27.5	9.3	9.3	10	10	0.2	0.2	5	5	20	19	28	29	7.1	7.1	113	114	1.13	1.2	92	111	137	138	4.6	4.6	0.6
0	1	1	7	10	6	1	3	0	0	0	0	0	0	0	0	0	0	0	0	0	3.79167	75	32	34	10.1	10.4	202	290	8.5	12.7	6	7	26	27	6	6	7.7	7.8	106	107	0.59	0.65	176	273	137	139	4.4	4.9	1.5
0	1	1	6	14	6	5	3	0	0	0	0	0	0	0	0	0	0	0	0	1	5.5	56	32.4	32.4	10.2	10.2	227	227	13.6	13.6	19.4	19.7	20	20	64	68	8.1	8.2	98	98	4.67	4.96	367	424	132	132	5.2	5.3	1.8
0	1	1	8	14	6	4	4	6	0	0	0	0	0	0	0	0	0	0	0	0	5.45833	69	32.8	31.6	10.4	10.6	119	118	8.8	8.8	6	6	21	21	19	19	7.8	7.8	104	104	1.43	1.43	98	98	131	131	5.2	5.2	1.3
0	0	1	2	15	6	5	4	0	0	0	0	0	0	0	0	0	0	0	0	0	1.66667	49	31.4	31.4	10.5	10.4	265	265	2	2	13.1	13.1	23	23	13	13	7.9	7.9	106	106	1	1	128	128	140	140	3.9	4	3.4
0	0	1	2	13	6	3	4	1	0	0	0	0	0	0	0	0	0	0	0	0	1.625	54	31.1	30.2	10.2	10	210	180	30.3	32.5	18	17	17	17	25	20	6.6	6.2	111	110	1	0.9	149	94	140	140	4	3.9	1.2
0	0	1	7	11	6	1	4	6	0	0	0	0	0	0	0	0	0	0	0	0	5.66667	66	32.1	36.3	10.5	12.4	202	202	35.4	35.4	16.6	16.6	19	20	37	38	7	6.9	98	98	1.44	1.03	261	366	134	134	3.1	3.1	2.4
0	0	1	7	15	6	5	4	0	0	0	0	0	0	0	0	0	0	0	0	0	1.125	74	35.9	39.2	11.8	12.9	70	125	16.17	20.06	14	15	14	17	74	81	7.2	7.6	113	117	7.02	8.03	122	197	141	145	3.4	4.1	0.5
1	1	2	8	3	1	1	1	10	0	0	0	0	0	0	0	0	0	0	0	0	5.25	34	29.7	30	9.5	9.9	102	120	0.9	1.6	10	11	15	17	12	16	5.7	6.2	106	110	0.79	1	75	99	134	137	3.1	3.5	3.6
0	0	2	6	9	4	1	4	0	0	0	0	0	0	0	0	0	0	0	0	0	1.16667	24	26	28.6	9.1	10	134	144	9.5	10.8	12	13	16	16	13	19	5.9	6.2	100	103	0.73	1.09	66	107	126	130	3.4	4.1	0.5
0	0	1	2	15	6	5	4	3	0	0	0	0	0	0	0	0	0	0	0	0	1.625	60	41.2	41.2	12.5	12.5	160	160	9.9	9.9	4	5	35	34	5	5	9.2	9.2	101	101	0.7	0.7	135	135	139	139	3.4	3.4	1.5
1	0	1	11	3	1	1	1	3	0	0	0	0	0	0	0	0	0	0	0	0	2.91667	58	25.1	32.3	8.1	10.5	182	191	10.9	14.5	21.3	28	7	13	110	110	7.9	7.9	109	121	4.85	4.85	616	616	148	154	4	4.8	3.4
0	1	1	11	6	4	1	1	0	0	0	0	0	0	0	0	0	0	0	0	0	4.625	52	27.6	27.6	8.9	8.9	219	219	8.7	8.7	17	16.5	23	23	20	20	7.4	7.4	106	106	0.93	0.93	120	120	142	142	4	4	1.4
0	0	1	3	15	6	5	4	1	0	0	0	0	0	0	0	0	0	0	0	0	1.83333	42	28.3	30.6	10.2	10.7	110	116	31.1	33.1	11	12	15	17	12	17	7.5	7.8	111	112	0.58	0.95	99	99	137	140	3.5	4.2	2
0	0	1	2	15	6	5	4	0	0	0	0	0	0	0	0	0	0	0	0	0	1	83	32.2	32.2	10.9	10.9	226	222	8.4	8.4	13.8	13	20	20	35	35	8.3	8.3	103	103	1.3	1.3	127	127	133	133	4.4	4.2	1.3
0	1	1	10	5	2	1	2	0	0	0	0	0	0	0	0	0	0	0	0	0	4.125	83	43.8	44	14.3	14.3	89	84	24.97	23.4	13	12	21	21	50	50	8.5	8.5	127	127	2.28	2.28	94	94	158	158	4	4	2.6
1	1	1	13	15	6	5	4	6	0	0	0	0	0	0	0	0	0	0	0	1	1	54	21.6	23.9	6.8	7.5	7	13	0.2	0.3	14	15.2	5	20	44	63	4.9	6.8	83	103	1.4	2.05	125	266	124	129	4.8	7.5	12.5
0	1	2	5	15	6	5	4	4	0	0	0	0	0	0	0	0	0	0	0	0	1.79167	68	29.8	29.8	9.2	9.2	197	197	14.2	14.2	13	16	20	21	22	32	7.8	8.5	106	108	1.22	1.42	215	330	141	142	3.7	4.5	5.6
0	1	2	7	14	6	5	3	0	0	0	0	0	0	0	0	0	0	0	0	0	5.91667	51	26.5	26.5	9.5	9.5	73	73	43.6	43.6	11	12	21	21	31	31	8.1	8.1	108	108	1.8	1.8	114	114	141	141	3.4	3.4	1.5
0	1	1	6	7	4	1	2	3	0	0	0	0	0	0	0	0	0	0	0	0	13.25	72	31.6	31.6	10.5	10.5	108	108	12.5	12.5	12.8	10.1	18	18	25	25	7	7	108	108	0.73	0.73	227	227	137	137	2.8	2.8	1.6
0	1	1	7	13	6	4	3	0	0	0	0	0	0	0	0	0	0	0	0	0	1.58333	62	38	38	12	12	264	264	15.8	15.8	11.7	12	20	20	39	39	9.2	9.2	107	107	1	1	124	124	136	136	5	5	1
0	1	1	6	15	6	5	4	0	0	0	0	0	0	0	0	0	0	0	0	0	3.16667	80	29.9	29.9	10.5	10.5	278	278	7.2	7.2	11.4	12.5	20	20	33	33	7.4	7.4	111	111	0.99	0.99	51	51	141	141	4.4	4.4	1.1
0	0	1	2	14	6	4	4	2	0	0	0	0	0	0	0	0	0	0	0	0	1.29167	64	22.5	25.2	7.4	8.2	313	341	9.9	12.4	11.6	11	25	25	10	10	7.4	7.4	98	98	0.49	0.49	139	139	132	132	3.3	3.3	0.9
1	0	1	9	13	6	4	3	0	0	0	0	0	0	0	0	0	0	0	0	0	6.875	76	45.4	45.4	14	14	116	116	28.4	28.4	10	11	24	24	24	24	7.9	7.9	109	109	0.5	0.5	99	99	141	141	5.3	5.3	12.5
1	0	2	9	3	1	1	1	10	0	0	0	0	0	0	0	0	0	0	0	1	16.6667	72	30.2	30.2	9.9	9.9	297	297	25.7	25.7	21.9	26	7	14	85	91	6.2	6.6	96	102	6.57	7.42	415	472	131	132	4	4.5	7.3
0	1	1	6	6	1	1	4	0	0	0	0	0	0	0	0	0	0	0	0	0	2	80	38.5	40.7	12.6	13.1	80	64	17.6	17.12	16.7	21.9	18	18	57	57	8.2	8.2	118	118	1.67	1.67	202	202	149	149	3.6	3.6	1.2
0	0	1	3	14	6	4	4	0	0	0	0	0	0	0	0	0	0	0	0	0	1.70833	72	38.1	38.1	12.4	12.4	131	131	8.3	8.3	11	10	27	26	18	17	7.4	7	104	103	0.93	0.96	149	139	138	137	4.1	4	1.5
0	0	1	7	11	6	2	3	0	0	0	0	0	0	0	0	0	0	0	0	0	2.91667	71	34.1	34.4	10.1	10.3	297	298	27.1	26.4	14.3	15	22	22	31	31	7.5	7.5	129	129	1.48	1.48	147	147	164	164	3.7	3.7	0.8
0	1	1	12	7	4	1	2	0	0	0	0	0	0	0	0	0	0	0	0	0	7.29167	51	33.7	33.7	11	11	132	132	11	11	14	13	21	21	74	74	7.6	7.6	110	110	6.07	6.07	95	95	143	143	4.2	4.2	1
1	1	1	5	15	6	5	4	0	0	0	0	0	0	0	0	0	0	0	0	1	1.29167	74	36.5	36.5	11.7	11.7	199	199	24.2	24.2	13	13	20	20	23	23	8.7	8.7	105	105	1.88	1.88	162	162	138	138	4.1	4.1	1.3
0	1	1	7	6	4	1	1	0	0	0	0	0	0	0	0	0	0	0	0	1	3	61	25.3	25.3	8.5	8.5	181	181	9.3	9.3	11	13.8	27	27	46	46	9	9	102	102	1.69	1.69	170	170	140	140	4.1	4.1	0.6
1	1	1	13	3	1	1	1	0	0	0	0	0	0	0	0	0	0	0	0	0	1	46	34.2	34.2	11.4	11.4	228	228	39.8	39.8	27	32	10	10	55	55	7.7	7.7	91	91	6	6	21	21	126	126	2.5	2.8	12.5
0	0	1	10	14	6	5	3	0	0	0	0	0	0	0	0	0	0	0	0	0	1.875	70	27.6	29.8	9.1	10	59	67	3.1	3.3	14	19	15	17	41	47	8	8.1	100	102	3.12	3.31	82	96	130	132	4	4	0.8
1	0	1	3	4	1	2	1	1	0	0	0	0	0	0	0	0	0	0	0	0	4.79167	83	35.3	35.3	11.8	11.8	191	191	31.4	31.4	15.2	16.8	19	19	13	13	8.4	8.4	106	106	0.77	0.77	123	123	135	135	4	4	2.7
0	0	1	8	15	6	5	4	0	0	0	0	0	0	0	0	0	0	0	0	0	1.95833	68	27.7	30.4	8.9	9.7	264	265	6.3	8.5	12	14	31	33	44	45	8.3	9.3	98	100	1.35	1.61	112	130	140	141	4	4.5	1.7
0	0	1	4	15	6	5	4	1	0	0	0	0	0	0	0	0	0	0	0	0	2.83333	78	40.6	40.6	13.2	13.2	107	107	24.4	24.4	15.3	20.3	19	19	42	42	8.6	8.6	107	107	2.03	2.03	134	134	141	141	3.5	3.5	0.7
0	0	1	8	13	6	4	3	0	0	0	0	0	0	0	0	0	0	0	0	0	2.125	70	28.1	28.1	9	9	203	203	15.4	15.4	16	16	23.9	23.9	42	42	9.2	9.2	100	100	2.25	2.25	183	183	140	140	4.2	4.2	2
0	1	2	12	3	1	1	1	3	0	0	0	0	0	0	0	0	0	0	0	0	5.91667	61	55.4	57.7	17.2	18.2	292	305	23.4	27.1	22	24	16	20	34	36	7.7	7.9	103	105	3.99	4.13	212	238	139	141	4.4	6.1	5.1
0	0	2	5	8	5	1	2	0	0	0	0	0	0	0	0	0	0	0	0	0	1.875	78	33.1	33.1	10.2	10.2	214	214	10.1	10.1	22.2	22.5	16	16	10	10	8.6	8.6	107	107	0.91	0.91	202	202	142	142	3.4	3.4	1.8
0	1	1	5	7	4	1	2	2	0	0	0	0	0	0	0	0	0	0	0	0	5.375	68	26	26	7.9	7.9	526	526	37.8	37.8	10.8	12.4	25	25	63	63	8.2	8.2	97	97	2.5	2.5	80	80	131	131	5.3	5.3	0.8
0	1	2	6	3	1	1	1	0	0	0	0	0	0	0	0	0	0	0	0	0	2.91667	71	31.9	35	10.9	11.9	176	194	4	7	13	18.4	18	24	16	20	7.9	8.7	102	108	0.99	0.99	76	196	136	141	3.1	4.2	1.1
1	1	2	7	3	1	1	1	0	0	0	0	0	0	0	0	0	0	0	0	0	27.6667	80	26.9	26.9	9.2	9.2	194	194	8.7	8.7	10	10	20	20	52	52	7.5	7.5	122	122	2.45	2.45	160	160	151	151	4.1	4.1	1.5
0	1	1	2	15	6	5	4	2	0	0	0	0	0	0	0	0	0	0	0	0	1.20833	45	33.2	33.2	10.6	10.6	227	227	8.3	8.3	12	11	33	33	55	55	8.2	8.2	94	94	1.22	1.22	137	137	136	136	4	4	0.8
0	1	1	2	14	6	5	3	0	0	0	0	0	0	0	0	0	0	0	0	0	1.41667	45	29.7	29.7	9.7	9.7	339	339	10.9	10.9	9	9	28	28	15	15	7.5	7.5	102	102	0.73	0.73	101	101	137	137	4.3	4.3	0.6
0	1	1	4	11	5	2	4	0	0	0	0	0	0	0	0	0	0	0	0	0	1.08333	81	38.5	38.5	12.6	12.6	143	143	11.8	11.8	10.9	10.6	20	20	33	33	7.7	7.7	109	109	1.58	1.58	97	97	137	137	4.4	4.4	1.1
0	1	1	7	12	4	4	4	0	0	0	0	0	0	0	0	0	0	0	0	0	4.45833	86	28.9	28.9	9.7	9.7	138	138	13.5	13.5	9	10	22	22	27	27	8.2	8.2	109	109	1.25	1.25	141	141	139	139	3.9	3.9	1.6
0	1	1	5	15	6	5	4	2	0	0	0	0	0	0	0	0	0	0	0	1	2.125	63	30.4	33	9.8	10.9	93	101	3.5	5.8	8	12	20	24	33	37	8.5	8.6	106	107	1.44	1.75	78	101	137	138	4.7	4.8	1.5
0	0	1	2	15	6	5	4	0	0	0	0	0	0	0	0	0	0	0	0	0	1.16667	74	25.7	27.4	8.4	9.5	715	715	18.8	18.8	12.5	12	17	17	19	19	8.3	8.3	101	101	1.22	1.22	98	98	127	127	5.2	5.2	1.7
0	1	1	8	15	6	5	4	0	0	0	0	0	0	0	0	0	0	0	0	0	3.91667	54	42.2	42.2	14.3	14.3	96	96	32.5	32.5	18	22	14	21	35	39	7.2	7.2	90	91	2.95	3.35	216	261	125	127	4.7	6	2.8
0	0	1	6	13	6	5	2	0	0	0	0	0	0	0	0	0	0	0	0	0	3.83333	72	41.6	41.6	13.9	13.7	653	653	15	15	15.7	17	18	19	7	7	8.1	8.6	106	108	0.7	0.7	455	455	140	140	2.7	4.8	1.3
0	1	1	3	14	6	4	4	0	0	0	0	0	0	0	0	0	0	0	0	0	4.04167	91	25.2	24.3	8.1	7.9	104	116	18	24.84	19.8	19.9	21	20	56	58	8	7.9	103	105	1.69	1.79	72	78	140	140	3.8	3.9	2.2
0	1	2	2	13	6	4	3	0	0	0	0	0	0	0	0	0	0	0	0	0	2	63	28.1	28.1	9.5	9.5	264	264	32.6	32.6	12.4	13	25	25	8	8	8.2	8.2	98	98	0.61	0.61	138	138	136	136	4.7	4.7	1
0	1	1	5	15	6	5	4	1	0	0	0	0	0	0	0	0	0	0	0	0	15.5417	63	43.6	43.6	15	15	123	123	8.7	8.7	12	11	17	17	66	66	8.3	8.3	103	103	3.25	3.25	109	109	133	133	4.1	4.1	0.7
0	1	1	2	15	6	5	4	0	0	0	0	0	0	0	0	0	0	0	0	0	3.95833	75	35.6	35.6	10.9	11	287	287	15.4	15.4	7	10	26	27	25	25	8.7	8.4	106	105	1.5	1.5	118	118	137	137	4.4	4.3	0.8
0	0	1	7	14	6	4	4	1	0	0	0	0	0	0	0	0	0	0	0	1	2.25	55	7.7	7.7	22.7	22.7	417	417	25.5	25.5	10	10	30.5	30.5	25	25	9.5	9.5	100	100	1.3	1.3	115	115	140	140	4.4	4.4	1.25
0	0	1	3	11	6	2	3	0	0	0	0	0	0	0	0	0	0	0	0	0	1.95833	55	43.1	43.1	13.6	13.6	445	432	10.9	10.9	9.2	8	36	34	9	9	9.9	9.9	99	101	0.8	0.8	101	101	144	144	4.9	4.5	2
0	0	1	5	6	4	1	1	2	0	0	0	0	0	0	0	0	0	0	0	0	7.91667	53	41.9	41.9	14.1	14.1	185	185	17.1	17.1	12	11	22	22	17	17	7.4	7.4	103	103	0.83	0.83	78	78	135	135	3.3	3.3	3.8
0	0	1	10	3	1	1	1	2	0	0	0	0	0	0	0	0	0	0	0	0	3.79167	53	33.4	37.4	11	12.1	212	238	7.9	8.9	9.1	8	20	20	26	26	7.7	7.7	111	111	1.26	1.26	130	130	138	138	3.8	3.8	1.3
0	0	1	3	15	6	5	4	0	0	0	0	0	0	0	0	0	0	0	0	0	2.625	71	28.8	28.8	9.6	9.6	167	167	15.8	15.8	6	6	12	12	46	46	6.8	6.8	121	121	1.98	1.98	77	69	139	139	5.8	5.8	1
0	0	1	9	9	5	1	3	0	0	0	0	0	0	0	0	0	0	0	0	0	1.66667	62	33	34.1	10.8	10.9	318	303	21.6	19.5	11.3	11	26	26	15	14	9	9.1	90	89	0.92	1	113	101	123	124	4.4	4.6	2.19
0	0	1	3	10	5	1	4	2	0	0	0	0	0	0	0	0	0	0	0	0	1.95833	67	47.3	47.3	14.6	14.6	146	140	5.05	5.05	21	17	22	21	16	16	7.6	7.8	103	105	0.8	0.8	163	163	140	140	3	3.7	3.4
1	1	1	11	3	1	1	1	0	0	0	0	0	0	0	0	0	0	0	0	0	1.70833	35	21.3	28.4	7.9	10.6	37	48	0.9	1	13	18	8	13	39	45	5.7	7.6	93	105	2.69	3.15	61	62	120	125	3.9	4.5	2.8
0	1	1	5	14	6	4	4	0	0	0	0	0	0	0	0	0	0	0	0	0	1.625	53	34.2	34.8	11	11.3	458	473	27.5	28.1	12	13	17	19	7	7	8.7	8.7	103	108	0.69	0.69	106	106	133	137	3.3	3.5	0.6
0	1	1	5	15	6	5	4	0	0	0	0	0	0	0	0	0	0	0	0	0	4.83333	46	59.2	59.2	19.5	19.5	175	175	21.6	21.6	21	20	20	20	22	22	7.5	7.5	104	104	3.38	3.38	145	145	142	142	6.1	6.1	7.6
0	1	1	7	14	6	4	4	2	0	0	0	0	0	0	0	0	0	0	0	0	2.79167	52	27.9	27.9	9.6	9.6	134	134	14	14	13	15.6	18	21	42	48	6.3	7.8	85	96	2.22	2.86	102	131	121	125	3.1	3.9	1.5
0	1	3	11	6	1	1	4	4	0	0	0	0	0	0	0	0	0	0	0	0	9.04167	60	26.6	37.7	9.1	12.9	91	93	23.7	29.5	16	17	14	16	123	128	7.1	7.8	96	97	6.78	7.37	77	272	122	125	3.9	4.1	1.3
0	1	2	6	5	3	1	1	0	0	0	0	0	0	0	0	0	0	0	0	0	4.58333	38	29.2	29.2	10	10	293	293	24.6	24.6	6	7	31.6	31.6	16	16	8	8	106	106	1.25	1.25	84	84	143	143	3.2	3.2	0.6
0	1	2	3	7	4	1	2	0	0	0	0	0	0	0	0	0	0	0	0	0	2.75	38	31.2	31.2	10.1	10.1	467	467	9.9	9.9	7	11	30	30	9	9	8.9	8.9	109	109	0.81	0.81	142	142	147	147	4.5	4.5	0.6
0	0	1	5	5	3	1	1	3	0	0	0	0	0	0	0	0	0	0	0	0	11.125	49	24.9	33	8.3	10.9	291	326	3.5	15.2	13	13	23.8	23.8	5	5	7	7	110	110	0.43	0.43	154	154	141	141	3.8	4.3	1
0	0	1	3	15	6	5	4	0	0	0	0	0	0	0	0	0	0	0	0	0	6.75	54	25.5	25.5	8.9	8.9	350	350	10.8	10.8	4.7	5	27	27	11	11	8.7	8.7	94	94	0.65	0.65	87	87	129	129	3.7	3.7	0.6
0	0	2	3	13	6	4	3	0	0	0	0	0	0	0	0	0	0	0	0	0	1.375	28	31	32.5	10.3	10.3	91	110	6.5	6.6	10.1	10	18	19	14	15	7.8	7.9	105	115	0.73	0.93	93	109	132	142	3.9	4.2	0.7
1	0	2	13	3	1	1	1	9	0	0	0	0	0	0	0	0	0	0	0	1	11.8333	33	38.6	38.6	12.8	12.8	129	129	31.1	31.1	23	23.6	9	9	68	68	7	7.4	94	94	9.95	9.95	170	170	137	137	4.7	4.7	9.4
1	0	1	4	14	6	5	3	2	0	0	0	0	0	0	0	0	0	0	0	0	2.45833	85	24.9	30	8.6	10.5	61	156	37.2	53.6	6	9	22	25	31	43	6.9	7.6	103	105	0.6	0.94	91	95	132	134	4.1	4.5	1.2
0	1	2	7	13	6	4	3	0	0	0	0	0	0	0	0	0	0	0	0	0	1.83333	66	31.2	31.2	10	10	190	190	8.3	8.3	7	7	20	20	53	53	8.1	8.1	109	109	1.22	1.22	86	86	137	137	4.7	4.7	3.69
0	1	1	7	15	6	5	4	1	0	0	0	0	0	0	0	0	0	0	0	0	5	65	52.6	52.6	17.2	17	384	382	4.8	4.8	7	6.9	29	29	49	49	8.7	8.8	103	102	2	2	80	80	136	136	4.2	5.9	2.1
0	1	1	8	15	6	5	4	0	0	0	0	0	0	0	0	0	0	0	0	0	3.20833	71	35.5	35.5	12.1	12.1	104	104	7.6	7.6	12.4	11	24	24	42	42	8.6	8.6	101	101	1.77	1.77	119	119	136	136	3.2	3.2	1
0	0	1	5	14	6	5	3	4	0	0	0	0	0	0	0	0	0	0	0	0	3.45833	66	27.4	27.4	8.9	8.9	285	285	17.9	17.9	8	15.2	11	15	97	115	7.9	7.9	112	116	5.85	6.84	94	230	140	141	5.7	6.7	1.1
0	1	1	7	13	6	3	4	0	0	0	0	0	0	0	0	0	0	0	0	1	2.58333	84	27.5	27.5	9.3	9.3	173	173	9	9	15	14	28	28	70	70	8	8	98	98	8.91	8.91	87	87	138	138	4	4	0.9
0	1	2	6	15	6	5	4	2	0	0	0	0	0	0	0	0	0	0	0	1	7.625	62	31	31	9.4	9.4	118	118	8.6	8.6	24	26	14	14	84	84	8.7	8.7	99	99	16.22	16.22	219	219	133	133	5.1	5.1	2
0	0	1	6	8	5	1	2	0	0	0	0	0	0	0	0	0	0	0	0	0	4.75	84	32.2	32.2	10.8	10.8	178	178	14.3	14.3	7	7	29.3	29.3	22	22	7.5	7.5	112	112	1.31	1.31	222	222	149	149	3	3	1.1
0	1	2	11	6	4	1	1	4	0	0	0	0	0	0	0	0	0	0	0	0	7.33333	63	35.4	39.3	11.9	13.1	106	162	15.1	21.1	13	14	14	14	41	45	6.9	8.2	106	111	1.92	2.73	327	603	134	137	4.6	4.6	1.8
0	1	2	5	15	6	5	4	0	0	0	0	0	0	0	0	0	0	0	0	0	1.33333	60	41.6	41.6	13.5	13.5	147	147	12.9	12.9	11	11	25	25	8	8	8.1	8.1	105	105	0.62	0.62	60	60	141	141	3.8	3.8	2.5
0	1	1	2	9	4	1	4	2	0	0	0	0	0	0	0	0	0	0	0	0	3.41667	83	37.9	37.9	12.2	12.3	170	162	18.6	18.6	6	6	27	26	19	19	7.9	7.8	103	102	1.5	1.5	144	144	136	136	4.8	4.8	1.9
0	0	1	4	5	1	2	2	1	0	0	0	0	0	0	0	0	0	0	0	0	3.79167	91	25.1	34.8	8.5	11.6	148	209	6	12.1	17	17	26	24	76	70	8.4	8.4	107	108	3.67	3.39	228	292	146	147	3.6	3.5	2
0	0	1	3	14	6	4	4	3	0	0	0	0	0	0	0	0	0	0	0	0	3.08333	76	29.1	29.1	9.6	9.6	143	143	9.3	9.3	8	9	18	18	36	36	6.8	6.8	108	108	0.83	0.83	104	104	138	138	3.2	3.2	1.4
0	0	1	11	14	6	4	4	1	0	0	0	0	0	0	0	0	0	0	0	0	1.91667	91	32.4	33.7	10.5	11	92	91	17.27	17.8	19.3	18	10	10	36	36	7.2	7.2	109	109	1.88	1.88	151	151	137	137	5.4	5.4	12.5
0	0	2	9	7	4	1	2	0	0	0	0	0	0	0	0	0	0	0	0	1	7.04167	53	32.7	32.7	10.4	10.4	214	214	5.2	5.2	10.8	14	20	25	35	70	7.8	9.1	101	102	3.5	5.33	88	94	132	137	4	6.5	1
0	0	1	8	10	4	3	3	0	0	0	0	0	0	0	0	0	0	0	0	0	1.45833	55	27.6	27.6	9.3	9.3	72	72	12.4	12.4	9	8	17	17	8	8	6.1	6.1	107	107	0.8	0.84	105	105	129	129	3.1	3.1	1.6
0	0	1	13	8	4	1	3	1	0	0	0	0	0	0	0	0	0	0	0	0	19.4583	55	25.7	37.4	8.5	12	33	48	1.1	1.9	22	21.7	11	11	13	16	6.7	7.4	106	110	1.05	1.44	55	150	138	140	3	4	12.7
0	0	1	3	15	6	5	4	0	0	0	0	0	0	0	0	0	0	0	0	0	2.08333	58	33.7	33.7	11.6	11.6	201	201	16.2	16.2	12.1	13	20	20	12	12	8.1	8.1	102	102	0.84	0.84	187	187	133	133	3.3	3.3	1
0	0	1	3	15	6	5	4	0	0	0	0	0	0	0	0	0	0	0	0	0	2.20833	58	36.9	36.9	12.2	12.2	277	277	9.8	9.8	13	13.3	29	29	27	27	9.6	9.6	100	100	1.38	1.38	189	189	139	139	4.3	4.3	1.7
0	0	2	13	7	4	1	2	5	0	0	0	0	0	0	0	0	0	0	0	0	4.875	59	25.8	25.8	8.3	8.3	30	30	12.3	12.3	11	11	13	13	47	47	6.3	6.3	113	113	4.5	4.5	138	138	138	138	3.2	3.2	1.4
0	0	2	5	15	6	5	4	0	0	0	0	0	0	0	0	0	0	0	0	0	2.91667	57	31.8	31.8	10.7	10.7	149	149	18.2	18.2	15	15	23	23	15	15	8.4	8.4	103	103	0.69	0.69	148	148	138	138	4.2	4.2	2.7
0	0	2	6	6	4	1	1	0	0	0	0	0	0	0	0	0	0	0	0	0	1.125	72	27.2	26.8	9	8.9	129	123	10.2	10.1	13	15.3	18	19	69	85	7.3	7.5	106	108	1.3	1.4	157	144	137	138	3.6	3.8	0.7
0	0	2	7	5	1	1	3	0	0	0	0	0	0	0	0	0	0	0	0	0	1.16667	72	42.9	42.9	13.2	13.2	198	198	20.4	20.4	17.3	16.8	24	24	65	65	8.4	8.4	115	115	1.01	1.01	104	104	153	153	4.8	4.8	2.9
0	0	2	4	6	1	1	4	0	0	0	0	0	0	0	0	0	0	0	0	0	2	72	31	31	9.7	9.7	323	323	33.3	33.3	19	18.3	26	26	49	49	8	8	117	117	0.72	0.72	196	196	153	153	3.8	3.8	0.6
0	0	2	5	15	6	5	4	0	0	0	0	0	0	0	0	0	0	0	0	0	2.5	23	31.5	35.7	9.7	11.1	227	241	18.5	19.3	4	9	13	21	12	22	8.3	8.3	119	122	0.64	0.85	144	144	144	147	3.6	4.3	0.7
0	0	1	6	15	6	5	4	1	0	0	0	0	0	0	0	0	0	0	0	0	2	48	30.3	30.9	10	10.3	176	178	7.4	7	8	8	17	17	36	36	8.2	8.2	107	107	1.11	1.11	130	130	133	133	4.2	4.2	1.7
0	0	1	9	4	1	1	2	0	0	0	0	0	0	0	0	0	0	0	0	0	6.5	49	30.9	34.8	10.5	11.7	133	177	27.6	24.2	13	13.6	12	13	68	69	8.5	8.7	114	114	2.3	2.57	81	85	135	138	4.6	5.4	1.7
0	0	1	4	15	6	5	4	2	0	0	0	0	0	0	0	0	0	0	0	0	4.91667	51	33.9	33.9	11.5	11.5	206	206	19.4	19.4	22	19.1	19	19	10	10	6.8	6.8	106	106	0.79	0.79	186	186	138	138	3.6	3.6	7.2
0	0	2	7	7	4	1	2	1	0	0	0	0	0	0	0	0	0	0	0	0	1.125	84	31.2	32.7	10	10.5	134	148	13.3	13.2	10.1	8	23	23	23	22	9.4	9.5	108	110	0.9	0.8	108	151	137	138	4.5	4.6	1.32
1	0	1	8	3	1	1	1	0	0	0	0	0	0	0	0	0	0	0	0	0	12.7917	78	26.6	26.6	8.4	8.4	322	322	10.6	10.6	14.1	14	22	22	26	26	8.6	8.6	114	114	1.29	1.29	155	155	148	148	3.8	3.8	1.5
1	1	1	4	14	6	4	4	3	0	0	0	0	0	0	0	0	0	0	0	0	3.33333	89	29.3	29.3	9.3	9.3	158	158	14.3	14.3	10	10	18	18	31	31	7.1	7.1	115	115	1.83	1.83	111	111	140	140	4.2	4.2	1.1
0	0	1	6	9	4	2	3	0	0	0	0	0	0	0	0	0	0	0	0	0	1.5	80	20.7	20.7	6.9	6.9	125	162	23.1	23.1	14.1	9	10	8	86	86	6.9	7	117	116	1.3	1.3	171	171	136	136	2.6	2.7	1.8
0	0	2	5	15	6	5	4	0	0	0	0	0	0	0	0	0	0	0	0	1	1.41667	66	35.4	33.9	11.3	10.9	217	208	19.8	19.4	18.8	18	21	21	50	50	9.2	9.2	99	99	6.99	6.99	156	156	136	136	3.2	3.2	2.4
0	1	1	5	3	1	1	1	0	0	0	0	0	0	0	0	0	0	0	0	0	6.91667	71	42.6	42.6	14.2	14.2	222	222	14.7	14.7	11.2	11	30	30	19	19	9.1	9.1	98	98	1.09	1.09	237	237	138	138	4	4	1.4
0	0	1	4	10	5	1	4	0	0	0	0	0	0	0	0	0	0	0	0	0	2.95833	71	39.2	39.2	13.1	13.1	215	215	24.2	24.2	17	19	18	20	32	36	9.5	9.5	108	114	1.64	1.86	130	152	146	148	2.9	3.5	2.3
0	0	2	5	6	4	1	1	0	0	0	0	0	0	0	0	0	0	0	0	0	2.66667	63	26.6	26.6	8.7	8.7	208	208	7.5	7.5	15.4	20	19	19	44	44	8.5	8.5	107	107	1.22	1.22	111	111	139	139	4.6	4.6	1.7
0	0	1	4	14	6	4	4	0	0	0	0	0	0	0	0	0	0	0	0	0	2.91667	53	22.5	22.5	7.6	7.6	107	107	13.1	13.1	15	15	20	20	22	22	8.3	8.3	103	103	1.66	1.66	95	95	133	133	4.4	4.4	0.9
0	0	2	7	6	1	1	4	4	0	0	0	0	0	0	0	0	0	0	0	1	1.45833	40	25.5	25.5	8.1	8.1	93	93	7.6	7.6	13.1	12	19	19	55	55	6.6	6.6	109	109	8.73	8.73	74	74	143	143	3.6	3.6	2.4
0	0	2	10	6	4	1	1	3	0	0	0	0	0	0	0	0	0	0	0	1	4.875	39	28.1	28.1	8.9	8.9	81	81	1.6	1.6	11	11	14	14	56	56	7.4	7.4	103	103	3.12	3.12	145	145	128	128	2.7	3.8	1.9
1	0	1	11	14	6	5	3	0	0	0	0	0	0	0	0	0	0	0	0	0	4.04167	65	13.2	13.2	4.7	4.7	33	33	0.1	0.1	12.2	14	22	22	16	16	6.8	6.8	99	99	0.93	0.93	141	141	130	130	3.2	3.2	1.5
0	0	1	5	10	5	1	4	0	0	0	0	0	0	0	0	0	0	0	0	0	2.75	61	51.2	51.2	17	17	178	169	15.8	15.8	12	13.2	33	35	4	4	9.8	9.9	96	95	0.9	0.9	130	130	138	138	3.3	4.4	0.6
1	0	2	13	5	3	1	1	3	0	0	0	0	0	0	0	0	0	0	0	0	5.95833	53	32	36.1	10.6	11.3	60	109	19.1	24.8	31.6	49	12	24	30	38	6.8	8.3	89	92	2.45	3.13	132	288	136	140	3.9	4.5	5.3
1	0	1	11	7	4	1	2	2	0	0	0	0	0	0	0	0	0	0	0	0	1.125	79	25.4	27.4	8.2	9	112	114	19	19.5	5	5	23	23	17	17	7.3	7.3	107	107	0.51	0.51	82	82	137	137	3.9	3.9	2
0	1	1	2	15	6	5	4	3	0	0	0	0	0	0	0	0	0	0	0	0	1.95833	75	32.4	33.6	10.4	10.7	128	135	11.3	15	10.4	10	19	19	22	22	8	8	108	108	0.78	0.78	100	100	134	134	4.6	4.6	1.4
0	0	2	4	14	6	4	4	0	0	0	0	0	0	0	0	0	0	0	0	0	2.33333	77	32.9	32.9	11	11	398	398	24.2	24.2	16.6	15	17	17	21	21	9.3	9.3	108	108	1.98	1.98	99	99	139	139	4	4	3.2
0	0	1	8	6	4	1	1	7	0	0	0	0	0	0	0	0	0	0	0	0	4.375	80	27.9	37.9	9.2	11.8	250	309	23.3	34.2	8	13	22	30	27	28	8.5	9.7	107	109	0.99	1.45	139	183	143	145	3	3.3	4.7
0	0	1	2	15	6	5	4	1	2	0	0	0	0	0	0	0	0	0	0	0	2.58333	91	27.9	27.9	9.6	9.4	190	193	8.2	8.2	11	13	22	22	49	54	7.1	7.9	106	106	2.1	2.3	156	221	137	140	4.3	4.3	3.55
1	0	1	12	3	1	1	1	3	0	0	0	0	0	0	0	0	0	0	0	0	2.16667	81	28.3	28.3	9	9	142	142	17.8	17.8	19	18	17.8	17.8	99	99	5.7	5.7	104	104	3.19	3.19	154	154	136	136	5.2	5.2	6.2
0	1	1	10	7	5	1	1	0	0	0	0	0	0	0	0	0	0	0	0	0	3.41667	74	21.8	21.8	7.4	7.4	77	77	14.6	14.6	18	18	26	29	45	52	8.7	8.8	94	98	1.54	2.4	117	171	136	140	4.5	4.5	0.7
0	0	1	12	3	1	1	1	4	0	0	0	0	0	0	0	0	0	0	0	0	3.75	86	34.6	34.6	11.7	11.7	158	158	12.6	12.6	14	13	24	24	33	33	7.9	7.9	97	97	1.64	1.64	187	187	134	134	3.7	3.7	2.9
0	0	2	10	14	6	4	4	4	0	0	0	0	0	0	0	0	0	0	0	0	4.125	87	34	40.5	11.6	13.6	38	57	28	31.2	11.5	12	15	16	34	47	6.9	7.3	113	114	3.13	3.54	37	65	141	141	4.7	5	2.5
0	0	1	5	15	6	5	4	0	0	0	0	0	0	0	0	0	0	0	0	1	4	77	35.8	35.8	11.8	11.8	133	129	21.5	21.5	9.9	9	26	26	25	25	7.2	7.3	98	98	1.1	1.1	116	116	129	129	4.4	4.6	1.7
0	0	1	8	8	4	1	3	0	0	0	0	0	0	0	0	0	0	0	0	0	1.16667	89	40	40	12.6	12.6	376	376	33.8	33.8	18.5	20	13	13	121	121	8.7	8.7	129	129	4.66	4.66	198	198	158	158	4	4	2.8
0	0	1	3	15	6	5	4	2	0	0	0	0	0	0	0	0	0	0	0	0	2.625	65	31.9	31.9	10.5	10.5	272	272	25.1	25.1	15	15	19	19	50	50	9.1	9.1	105	105	1.46	1.46	189	189	136	136	3.8	3.8	2.3
0	0	1	11	6	4	1	1	3	0	0	0	0	0	0	0	0	0	0	0	0	11.9167	65	36.3	36.3	11.9	11.9	280	280	6.6	6.6	15.4	14	8	8	51	51	7.9	7.9	111	111	2.17	2.17	155	155	131	131	5.6	6.1	1.3
0	1	1	10	14	6	4	4	0	0	0	0	0	0	0	0	0	0	0	0	0	2.45833	91	27.3	27.3	9.1	9.1	197	197	8.8	8.8	9	12	22	22	39	39	8.1	8.1	111	111	1.74	1.74	108	108	143	143	2.9	2.9	1.2
0	1	4	2	15	6	5	4	3	0	0	0	0	0	0	0	0	0	0	0	0	4.79167	24	26.6	29.3	8.2	9.3	126	142	6.6	9.7	6	8	31	33	11	15	7.6	7.7	108	110	1.4	1.8	88	169	148	147	2.9	3.5	1.2
0	1	4	2	15	6	5	4	0	0	0	0	0	0	0	0	0	0	0	0	0	3	24	32.6	32.6	10.5	10.5	143	143	10.4	10.4	10	12	17	17	12	12	8.3	8.3	109	109	0.72	0.72	74	74	138	138	3	3.3	0.8
0	0	2	10	14	5	5	4	4	0	0	0	0	0	0	0	0	0	0	0	0	2.5	64	29.4	33.6	10.2	11.5	174	197	6.4	9.8	3	7	14	17	19	20	6.8	6.9	117	117	0.7	0.76	61	104	143	139	2.7	3.4	1.1
0	0	1	5	11	6	1	4	0	0	0	0	0	0	0	0	0	0	0	0	0	2.25	80	32.2	32.8	10.4	9.2	205	199	8.3	7.4	20	27	14	17	73	70	7.9	8.1	109	113	2.31	1.93	135	135	140	143	4.3	4.3	1.4
1	0	1	16	3	1	1	1	7	0	0	0	0	0	0	0	0	0	0	0	0	2.91667	50	22.5	33.2	7.1	11	10	54	8.3	32	23.9	26	9	13	44	48	6.6	8.2	99	103	2.23	2.7	30	57	131	133	3.8	4.6	10.7
0	0	1	2	15	6	5	4	5	0	0	0	0	0	0	0	0	0	0	0	0	1.83333	67	28.3	28.3	9.5	9.9	238	244	7.3	7.3	12	15	24	24	14	14	8.3	8.3	97	97	0.9	0.9	168	168	133	133	3.4	3.5	1.4
0	1	1	3	14	6	5	3	1	0	0	0	0	0	0	0	0	0	0	0	0	1.79167	63	29.1	29.1	9.3	9.3	505	505	39.5	39.5	7	7	21	21	53	53	8.5	8.5	109	109	2.37	2.37	59	59	137	137	4.4	4.4	1.1
0	1	1	3	14	6	5	3	0	0	0	0	0	0	0	0	0	0	0	0	0	1.45833	41	32.9	32.9	10.8	10.8	174	174	16.8	16.8	16	19	16	18	16	18	7.4	7.7	102	104	1.2	1.56	117	211	136	138	3.1	3.2	1.2
0	1	1	6	11	2	5	4	0	0	0	0	0	0	0	0	0	0	0	0	0	4.70833	29	27.9	27.5	9.8	9.7	171	172	15.3	16.4	11	13	17	19	15	23	7	7.3	107	110	2.16	2.39	173	198	132	134	3.7	4.1	0.8
0	1	2	3	15	6	5	4	0	0	0	0	0	0	0	0	0	0	0	0	0	1.66667	61	27.9	31	8.6	9.7	133	142	6	6.8	14	16	19	19	62	62	7.9	7.9	101	101	2.95	2.95	129	129	130	130	3.9	3.9	0.8
0	0	1	4	15	6	5	4	0	0	0	0	0	0	0	0	0	0	0	0	0	3.20833	79	31.2	31.2	10	10	153	153	11.5	11.5	3	4	22	22	10	10	6.9	6.9	110	110	0.7	0.7	89	89	135	135	3.3	3.3	1.1
0	0	1	4	15	6	5	4	1	0	0	0	0	0	0	0	0	0	0	0	1	5.04167	44	32.8	32.8	11.5	11.5	532	532	6.5	6.5	21.7	21	18	18	69	69	8.6	8.6	102	102	2.36	2.36	129	129	136	136	2.8	2.8	1.9
0	0	1	6	14	6	4	4	3	0	0	0	0	0	0	0	0	0	0	0	0	6.33333	78	33.9	32.7	11.5	11.1	122	127	2.49	3.5	11	12.3	14	13	15	10	7.6	7.4	102	105	1.3	1.28	121	145	127	131	2.9	3.6	3.6
0	0	1	9	15	6	5	4	0	0	0	0	0	0	0	0	0	0	0	0	0	8.29167	40	27.4	27.4	9.3	9.3	355	355	30.5	30.5	11	9	18	18	8	8	6.7	6.7	108	108	0.6	0.6	364	364	135	135	3.3	3.3	6.1
0	0	2	5	10	4	3	3	1	0	0	0	0	0	0	0	0	0	0	0	0	2.54167	41	28.5	28.5	9	9	62	62	19.2	19.2	15.4	14.7	27	27	36	36	7.5	7.5	99	99	1.86	1.86	210	210	137	137	3.6	3.6	1.1
0	0	2	10	6	4	1	1	0	0	0	0	0	0	0	0	0	0	0	0	0	12.125	40	36.4	36.4	11.5	11.5	68	68	6.3	6.3	16	16	18	18	17	17	7.9	7.9	99	99	2.17	2.17	400	400	131	131	4.8	4.8	4.4
0	0	2	6	15	6	5	4	0	0	0	0	0	0	0	0	0	0	0	0	0	1.375	41	25.8	25.8	8.1	8.1	102	102	14.7	14.7	8	10	22	22	8	8	7.8	7.8	116	116	0.65	0.65	138	138	144	144	3.4	3.4	1.4
1	1	1	7	6	4	1	1	2	0	0	0	0	0	0	0	0	0	0	0	0	2.54167	78	35.7	35.7	12.1	12.1	197	197	8.2	8.2	13.7	13	23	23	41	41	8.5	8.5	111	111	0.92	0.92	112	112	144	144	3.3	3.3	2.1
0	0	1	2	15	6	5	4	0	0	0	0	0	0	0	0	0	0	0	0	1	2.95833	19	31.6	31.6	11	11	237	237	10.5	10.5	9	9	18	18	9	9	7.5	7.5	114	114	0.64	0.64	85	85	139	139	3.6	3.6	0.6
0	1	2	10	12	4	4	4	0	0	0	0	0	0	0	0	0	0	0	0	0	3.625	66	30.1	30	9.9	10	58	56	0.4	0.2	21.8	20	19	19	31	31	9.2	9.2	111	111	1.9	1.9	114	114	149	149	3.3	3.3	5.8
0	1	2	7	15	6	5	4	0	0	0	0	0	0	0	0	0	0	0	0	0	2.79167	80	32.9	32.9	10.7	10.7	64	64	8.4	8.4	14.9	19.7	19	26	9	10	5.8	6.2	96	99	0.98	1.19	97	116	137	137	2.7	6	1.5
0	1	2	8	10	4	2	4	4	0	0	0	0	0	0	0	0	0	0	0	0	8.29167	80	21.8	21.8	6.2	6.2	143	143	21.3	21.3	16	15.9	9	9	24	24	7.3	7.3	115	115	1.29	1.29	87	87	137	137	2.9	3.4	1.8
0	1	2	8	14	6	5	3	2	0	0	0	0	0	0	0	0	0	0	0	0	7.5	45	26.5	27.9	9.2	9.9	91	99	9	10.3	10	12	18	21	24	24	7.6	7.8	103	104	1.58	1.53	115	106	134	135	3.6	4.1	4.6
0	0	1	9	7	4	1	2	0	0	0	0	0	0	0	0	0	0	0	0	0	12.6667	65	30.2	41.6	13.2	13.2	92	129	23.8	23.8	19	34	8	24	65	67	7.3	8.9	98	98	2.74	3.35	83	129	135	140	3.3	4.5	8.6
0	0	1	10	13	6	4	3	0	0	0	0	0	0	0	0	0	0	0	0	0	2.79167	58	27.7	27.7	9.4	9.4	72	72	11.3	11.3	16	17	14	15	91	92	6.6	6.6	104	107	3.28	3.31	217	259	134	135	5.1	5.2	2
0	1	1	7	11	6	1	4	0	0	0	0	0	0	0	0	0	0	0	0	0	12.1667	49	34.9	34.7	11.7	11.4	187	193	14	10.5	18	17	15	15	116	116	8.3	8.3	120	120	3.01	3.01	132	132	152	152	4.5	4.5	1
0	1	1	5	9	4	1	4	6	0	0	0	0	0	0	0	0	0	0	0	0	2.91667	78	39.2	39.2	12.8	12.8	157	157	22.9	22.9	9	10	23	23	39	47	8.2	8.7	114	118	1.15	1.28	137	264	146	152	3.9	4	0.2
0	0	1	9	14	6	4	4	2	0	0	0	0	0	0	0	0	0	0	0	0	1.95833	73	33.1	33.1	10.3	10.3	126	126	14.6	14.6	14.6	12	23	23	36	36	8.7	8.7	100	100	2.75	2.75	220	220	138	138	5.3	5.3	2.1
0	1	1	7	15	6	5	4	0	0	0	0	0	0	0	0	0	0	0	0	0	6.79167	83	31.7	31.7	10.3	10.3	267	267	20.1	20.1	16	20.2	16	20	27	33	8.6	8.9	105	106	2.04	2.09	160	180	137	139	4.1	4.4	1.4
1	1	1	8	7	4	1	2	0	0	0	0	0	0	0	0	0	0	0	0	1	2.79167	72	40.8	44.8	13.4	14.7	192	225	9.49	13	12	18.7	20	24	13	25	7.2	8	96	102	2.12	3.7	101	156	134	137	4.8	5.9	6.6
0	0	2	7	14	6	5	3	0	0	0	0	0	0	0	0	0	0	0	0	0	9.54167	74	30.4	30.4	9.6	9.6	162	162	23.4	23.4	17	21.7	20	20	52	52	8.1	8.1	98	98	4.2	4.2	349	349	131	131	4.2	4.2	2.4
0	0	2	11	9	5	1	3	1	0	0	0	0	0	0	0	0	0	0	0	0	3.83333	77	53.7	53.7	17	17	87	87	5.1	5.1	31	34.3	11	17	98	101	8.3	9.6	101	104	4.37	4.46	78	164	144	147	4.7	5.2	10.7
1	1	1	6	3	1	1	1	0	0	0	0	0	0	0	0	0	0	0	0	0	2.29167	81	34.8	29.2	11.4	9.4	395	478	14.2	15.6	20.5	23.8	18	18	58	58	8.3	8.3	105	105	3.11	3.11	198	198	140	140	6.2	6.2	1.5
0	0	1	5	15	6	5	4	0	0	0	0	0	0	0	0	0	0	0	0	0	3.95833	58	32.6	32.6	10.9	10.9	87	87	5.8	5.8	10	10.9	22.6	22.6	26	26	8.2	8.2	107	107	1.48	1.48	116	116	135	135	3.2	3.2	1.2
0	0	1	9	10	6	1	3	1	0	0	0	0	0	0	0	0	0	0	0	0	8.16667	72	28.6	28.6	8.9	8.9	193	193	18.9	18.9	9	9	16	16	33	33	7.4	7.4	119	119	1.01	1.01	84	84	143	143	4.7	4.7	0.8
0	0	2	6	8	3	2	3	1	0	0	0	0	0	0	0	0	0	0	0	0	1.41667	58	42.9	42.9	13.6	13.7	158	164	13.9	15.8	16	17.6	21	22	23	29	9.3	8.8	105	109	1.1	1.39	136	195	142	144	4.2	4.2	5.7
0	1	2	5	6	4	1	1	0	0	0	0	0	0	0	0	0	0	0	0	1	15.8333	44	20.5	26.3	6.9	8.6	551	551	22.3	22.3	11	10	25	25	32	32	8.1	8.1	97	97	5.14	5.14	74	74	131	131	4	4	0.4
0	1	1	6	9	5	2	2	0	0	0	0	0	0	0	0	0	0	0	0	0	7	59	27.5	27.5	8.7	8.7	305	305	20.6	20.6	17	13	18	18	103	103	9.9	9.9	134	134	7.2	7.2	96	96	167	167	5	5	2.1
0	1	1	6	14	6	4	4	0	0	0	0	0	0	0	0	0	0	0	0	1	14.0417	56	31.1	33.2	10.2	11	85	93	10.5	11.2	15	16	24	24	39	39	9.1	9.1	99	99	5.4	5.4	99	99	136	136	4.3	4.3	2.1
0	1	1	3	15	6	5	4	0	0	0	0	0	0	0	0	0	0	0	0	0	1.16667	54	35.5	35.5	12	12	157	157	8.9	8.9	15	15	19	19	12	12	8.9	8.9	105	105	1.01	1.01	211	211	138	138	4	4	5.2
0	1	1	2	15	6	5	4	0	0	0	0	0	0	0	0	0	0	0	0	0	1.66667	54	31.1	31.1	9.9	9.9	146	146	15.3	15.3	9	9	23	23	7	7	7.3	7.3	106	106	0.47	0.47	125	125	135	135	3.5	3.5	1.7
0	0	1	4	13	5	4	4	4	0	0	0	0	0	0	0	0	0	0	0	0	4.95833	68	28.1	32.6	9	10.6	158	189	12.5	15.4	12	12	17	17	47	47	7.5	7.5	110	110	2.08	2.08	142	142	138	138	4.3	4.3	1.4
0	0	1	6	14	6	4	4	3	0	0	0	0	0	0	0	0	0	0	0	0	3.08333	72	29.6	29.6	9.7	9.7	234	234	18.3	18.3	24	22	8	8	33	33	7.1	7.1	107	107	1.43	1.43	125	125	139	139	4.3	4.3	1.2
0	0	1	5	9	4	1	4	0	0	0	0	0	0	0	0	0	0	0	0	0	2.125	91	38	38	12.7	12.8	181	173	27	27	9	7	30	28	22	22	8.2	8.1	101	99	0.7	0.7	194	194	134	134	3.6	3.6	1.7
0	1	1	6	15	6	5	4	0	0	0	0	0	0	0	0	0	0	0	0	0	2.20833	85	23.3	23.3	7.5	7.5	292	292	32.6	32.6	10	10	26	26	20	20	8.1	8.1	104	104	0.84	0.84	14	14	138	138	3.6	3.6	1.3
0	1	1	7	15	6	5	4	3	0	0	0	0	0	0	0	0	0	0	0	0	3.5	50	32.2	32.2	10.5	10.5	325	323	29.5	29.5	14	14.7	26	26	31	31	8.2	8	89	89	2.5	2.5	204	204	130	130	4.4	4.4	4
1	1	1	2	9	3	5	1	3	0	0	0	0	0	0	0	0	0	0	0	0	4.54167	78	28	28	8.7	8.8	121	123	10.2	10.2	9	10	25	25	23	23	7.7	7.7	107	111	0.9	0.9	78	78	139	139	4.1	4.1	1.9
0	1	1	2	15	6	5	4	0	0	0	0	0	0	0	0	0	0	0	0	0	1.375	69	26.7	28.7	8.6	9	286	299	19.2	24.3	10.1	12.3	20	20	29	39	7.8	7.9	110	112	1.26	1.49	95	98	139	140	4.2	4.2	1.2
0	1	2	8	15	6	5	4	1	0	0	0	0	0	0	0	0	0	0	0	1	2.25	57	29.1	29.1	9.3	9.3	66	66	23.2	23.2	13	16	20	23	46	49	7.2	7.5	100	101	10.72	10.89	94	110	134	137	4.3	4.9	1.37
0	0	1	6	6	4	1	1	6	0	0	0	0	0	0	0	0	0	0	0	0	6.875	56	38.2	39.3	12.5	12.8	181	189	23.3	23.9	15	22	14	15	21	23	7	8	104	105	1.01	1.4	93	211	133	136	3.8	4	2.7
1	0	1	5	15	6	5	4	0	0	0	0	0	0	0	0	0	0	0	0	0	3.66667	55	31.1	31.1	10.3	10.3	125	125	6.6	6.6	16.5	20	23	23	25	25	7.2	7.1	98	98	0.7	0.7	202	181	131	131	3.9	3.9	1.5
0	0	1	2	6	4	1	1	2	0	0	0	0	0	0	0	0	0	0	0	0	7.33333	50	31.3	31.3	10.5	10.5	150	150	12.8	12.8	9	10	21	21	7	7	7.8	7.8	114	114	0.6	0.6	140	140	142	142	3.8	3.8	0.9
0	1	1	4	14	6	5	3	0	0	0	0	0	0	0	0	0	0	0	0	0	1.70833	73	34.1	34.1	11.8	11.8	65	65	9.1	9.1	11	11.7	18	18	18	18	7	7	110	110	0.78	0.78	94	94	137	137	3.9	3.9	1
0	1	1	8	14	6	5	3	0	0	0	0	0	0	0	0	0	0	0	0	0	2.41667	64	47.1	47.1	15.7	15.7	63	60	16.3	16.3	11	11	24	23	24	24	8.1	8	101	101	1.7	1.7	334	334	134	134	4.1	3.9	2.6
0	1	1	10	5	3	1	1	0	0	0	0	0	0	0	0	0	0	0	0	0	8.04167	48	30.1	32.6	10.8	11.5	107	107	11.2	11.2	10.3	8	22	22	11	11	7	7	115	115	0.74	0.78	84	84	140	140	3.4	3.4	1.1
0	0	1	10	8	4	1	3	2	0	0	0	0	0	0	0	0	0	0	0	0	6.58333	69	22.7	22.7	7.2	7.2	297	297	86.6	86.6	21.3	18	14	11	46	47	6.7	6.1	118	112	1.9	1.9	193	127	142	141	4.4	4.8	0.9
1	0	1	8	3	1	1	1	1	0	0	0	0	0	0	0	0	0	0	0	0	5.125	63	29.5	31.5	9.5	10.1	273	315	8.7	14.6	11.6	17	14	22	21	23	7	7.3	115	115	0.57	0.76	84	87	143	145	3.1	3.5	3.8
0	0	1	9	6	4	1	1	4	0	0	0	0	0	0	0	0	0	0	0	0	25.125	63	34.3	34.3	10.9	10.9	356	356	16	16	13	13	17	17	40	40	6.4	6.4	113	113	1.24	1.24	102	102	141	141	4.4	4.4	1.9
0	0	1	5	14	6	5	3	0	0	0	0	0	0	0	0	0	0	0	0	0	1.625	50	28.2	28.2	9.5	9.5	162	162	6.7	6.7	9.5	9	20	20	4	4	7.9	7.9	114	114	0.59	0.59	96	96	140	140	4.2	4.2	0.7
0	1	2	17	3	1	1	1	2	0	0	0	0	0	0	0	0	0	0	0	0	3.5	60	36.4	36.4	12.5	12.5	12	12	18.6	18.6	15	16	17	17	22	22	7	7	96	96	3.15	3.15	101	101	128	128	2	4.1	2.3
0	1	1	5	3	1	1	1	0	0	0	0	0	0	0	0	0	0	0	0	0	4.83333	55	31.1	31.1	10.1	10.1	202	202	9.7	9.7	14	14	24	24	15	15	9.1	9.1	98	98	0.72	0.72	101	101	135	135	4.5	4.5	1.3
0	1	1	4	11	6	2	3	0	0	0	0	0	0	0	0	0	0	0	0	0	2.875	81	38.6	38.6	13	13	154	154	7.9	7.9	11	11	23	23	12	12	9	9	108	108	1	1	102	102	139	139	3.7	3.7	0.7
0	1	2	7	14	6	5	3	0	0	0	0	0	0	0	0	0	0	0	0	0	1.75	66	36	36.1	11.8	12.2	108	110	7.3	26	11.8	12.6	19	20	17	18	7.9	8.6	108	110	1.14	1.37	63	79	137	139	3.1	3.5	1
0	1	1	7	15	6	5	4	3	0	0	0	0	0	0	0	0	0	0	0	0	1.375	84	33.5	33.5	10.9	10.9	280	280	23.9	23.9	14	14	21	21	40	40	8.3	8.3	109	109	2.21	2.21	104	104	140	140	3.8	3.8	1.2
0	1	1	9	6	4	1	1	0	0	0	0	0	0	0	0	0	0	0	0	0	3.16667	40	24.8	27.2	7.8	9	362	362	17.4	17.4	14	20.5	10	18	120	120	7.8	8.3	103	112	7.38	7.38	79	263	141	148	4.4	5	1.6
0	1	1	4	11	4	4	3	0	0	0	0	0	0	0	0	0	0	0	0	0	2.79167	79	31	30	10.9	10.6	164	183	41.7	44.7	13.1	13.6	19	18	19	21	7.1	7.1	110	110	1.2	1	196	190	136	140	3.3	4.1	1.4
0	0	1	7	14	6	4	4	1	0	0	0	0	0	0	0	0	0	0	0	0	10	68	26.4	26.4	8.6	8.6	46	46	0.7	0.7	15.5	16	17	18	24	31	5.9	7.5	108	109	1.16	1.63	192	232	136	137	3.8	4.3	0.9
1	1	1	10	3	1	1	1	4	0	0	0	0	0	0	0	0	0	0	0	0	1.33333	73	32.9	35.2	10.2	11.2	122	123	30.5	32.6	19.8	22	8	11	67	73	6.5	7.8	109	109	3.09	3.69	211	387	138	142	5.1	5.8	7.3
0	1	1	2	15	6	5	4	0	0	0	0	0	0	0	0	0	0	0	0	0	2.125	65	37.7	37.7	13	13	120	120	14.6	14.6	13	13	21	21	21	21	7.1	7.1	110	110	1.07	1.07	122	122	139	139	4.4	4.4	1.2
1	1	1	9	6	3	1	2	1	0	0	0	0	0	0	0	0	0	0	0	0	21.2917	62	22.7	35.5	7.7	11.8	196	211	12.7	15.2	11.3	21.4	16	26	66	78	6.2	7.5	88	94	3.57	4.96	245	434	129	136	5.1	5.9	6.2
1	1	1	6	12	6	2	4	0	0	0	0	0	0	0	0	0	0	0	0	0	3.45833	57	29.5	31.2	9.6	10.1	208	207	10.3	10.2	14	14.5	22	20	37	31	7.5	7.3	106	104	1.74	1.29	135	98	144	143	3.7	3.2	3.6
1	0	1	11	6	4	1	1	2	0	0	0	0	0	0	0	0	0	0	0	1	2.625	74	41.4	43.6	13.7	14	431	435	14.3	17.6	17	27.7	13	21	53	107	8.4	9.8	100	101	3.17	5.21	170	193	136	140	5.3	6.7	4.2
1	1	1	5	8	3	1	4	3	0	0	0	0	0	0	0	0	0	0	0	0	1.04167	77	45.2	45.2	16	16	147	135	44	44	18	16.2	19	17	33	33	7.9	7.7	108	107	3.4	3.4	125	125	137	137	4.3	4.1	2.5
1	0	2	13	5	1	1	3	8	0	0	0	0	0	0	0	0	0	0	0	1	21.4583	72	29.5	33.2	8.5	10	576	577	22.9	27.8	15	20.3	15	20	77	200	7.8	9.6	106	116	2.44	5.49	215	341	141	152	4.6	5.2	2.5
0	0	2	7	14	6	5	3	1	0	0	0	0	0	0	0	0	0	0	0	0	2.91667	56	28.7	28.7	9.7	9.6	188	187	12.2	12.2	20	24	12	13	48	48	7.1	7	104	104	17.8	17.8	307	307	133	133	4.2	4.5	0.56
0	1	1	7	10	4	3	3	0	0	0	0	0	0	0	0	0	0	0	0	0	4.08333	78	33.9	33.9	11.3	11.3	226	226	9.9	9.9	12	12	29.5	29.5	22	22	9	9	101	101	0.8	0.8	127	127	141	141	3.7	3.7	2.9
1	1	1	10	3	1	1	1	2	0	0	0	0	0	0	0	0	0	0	0	0	1.125	91	24.3	24.3	8	8	148	148	17.7	17.7	22	21.1	14	14	60	60	8.8	8.8	111	111	2.39	2.39	54	54	146	146	5	5	7.1
0	1	1	12	3	1	1	1	6	0	0	0	0	0	0	0	0	0	0	0	0	4.5	63	33.5	33.5	10.8	10.8	252	252	18.1	18.1	8	8	28	28	49	49	8.4	8.4	108	108	1.29	1.29	189	189	145	145	3.8	3.8	1.6
1	0	1	4	8	4	2	2	1	0	0	0	0	0	0	0	0	0	0	0	0	2.33333	75	36.1	36.1	11.8	11.8	178	178	10.9	10.9	18	18.8	14	14	29	29	7.7	7.7	101	101	2.39	2.39	78	78	133	133	4.7	4.7	10.8
0	1	1	6	13	6	4	3	0	0	0	0	0	0	0	0	0	0	0	0	0	2.54167	91	22.4	23.4	7.2	7.4	188	188	17.6	17.6	14	16	19	23	93	112	7.6	8.5	125	129	1.52	1.92	129	135	158	161	3.6	4.1	0.9
0	0	1	2	7	3	1	3	0	0	0	0	0	0	0	0	0	0	0	0	1	10.1667	88	37.5	37.1	12.5	12.4	309	299	43.5	42.7	13.3	13	25	25	11	11	8.7	8.7	94	94	0.77	0.77	115	115	131	131	3.7	3.7	1.1
1	0	1	7	3	1	1	1	0	0	0	0	0	0	0	0	0	0	0	0	0	2.25	68	37.7	43.5	11.8	13.8	114	247	11.2	20.2	15	27.5	7	17	25	29	6.4	7.7	112	119	0.77	0.9	113	257	144	145	3.6	5	7
0	0	1	6	14	6	5	3	0	0	0	0	0	0	0	0	0	0	0	0	0	2.83333	75	35.4	35.4	10.7	10.7	331	331	12	12	12	13.3	28	30	12	12	8.5	8.4	100	100	0.6	0.6	93	93	139	139	3.8	3.8	2.8
0	0	1	5	3	1	1	1	0	0	0	0	0	0	0	0	0	0	0	0	0	26.5833	66	35.4	37.4	11	11.8	351	378	13.9	15.33	11	15	23	26	21	26	7.2	7.4	97	103	0.64	0.9	251	472	133	137	3.2	3.8	0.9
0	0	1	9	6	4	1	1	0	0	0	0	0	0	0	0	0	0	0	0	0	12.0833	62	26.1	26.1	8.8	8.8	111	111	10.3	10.3	9	9.4	23.4	23.4	35	35	6.4	6.4	113	113	0.74	0.74	92	92	144	144	3.8	3.8	0.9
0	0	1	14	8	5	1	2	1	0	0	0	0	0	0	0	0	0	0	0	0	5.66667	26	30	30	10.5	10.5	44	57	10.9	10.9	8	8	16	16	10	10	6.9	6.9	111	111	0.53	0.53	102	102	137	137	3.1	3.1	2.1
0	0	1	4	15	6	5	4	0	0	0	0	0	0	0	0	0	0	0	0	0	1.45833	80	28	28.8	9.2	9.4	340	349	11.4	11.71	14	15	32	32	82	82	8.4	8.4	92	92	1.87	1.87	131	131	140	140	4	4	0.9
0	0	1	9	6	4	1	1	1	0	0	0	0	0	0	0	0	0	0	0	0	10.9167	51	30.4	31.1	10.3	10.4	111	127	13.3	13.9	14.2	19	16	17	60	74	7.4	8.3	105	110	1.6	2.64	90	113	137	139	2.6	3.3	0.9
0	0	1	5	14	6	5	3	0	0	0	0	0	0	0	0	0	0	0	0	0	1.625	35	23.2	23.2	7.4	7.4	25	27	11.6	11.6	10	10	23	23	11	11	8	8	103	103	0.6	0.6	100	100	134	134	3.2	3.2	1.3
0	0	2	5	9	4	1	4	0	0	0	0	0	0	0	0	0	0	0	0	0	2.70833	53	31.5	34.1	9.6	10.6	104	103	8.1	7.5	18	27	21	23	43	45	8.8	9.6	122	128	0.94	0.95	215	443	159	167	3.5	4	1.5
0	0	1	5	15	6	5	4	0	0	0	0	0	0	0	0	0	0	0	0	1	1.95833	59	30.1	30.1	10.6	10.6	152	152	16.9	16.9	12	17	14	25	69	120	7.4	7.7	90	94	8.21	12.14	80	121	123	130	3.9	6.2	0.4
1	0	1	12	7	4	1	2	2	0	0	0	0	0	0	0	0	0	0	0	0	1.25	57	36.1	39.1	10.5	11.7	221	221	33.4	33.4	20	21	17	22	42	42	6.1	6.9	103	103	1.29	1.64	93	114	136	140	5.4	5.6	3.4
1	0	2	11	12	6	2	4	0	0	0	0	0	0	0	0	0	0	0	0	1	2.58333	62	27.1	27.1	9.1	9.1	270	270	14.5	14.5	12	12	27	27	22	22	9	9	98	98	4.18	4.18	53	53	137	137	3	3	1.8
1	0	2	5	3	1	1	1	2	0	0	0	0	0	0	0	0	0	0	0	1	10.875	32	33.8	33.8	11	11	354	354	18.5	18.5	14.7	15	30	30	13	13	8.6	8.6	93	93	1.05	1.05	111	111	135	135	4.2	4.2	0.5
0	0	1	6	6	3	1	2	0	0	0	0	0	0	0	0	0	0	0	0	0	2.95833	69	28.4	29.3	9.4	9.4	353	353	17.8	17.8	9	14.6	14	25	48	51	7.3	7.6	95	97	3.71	4.49	252	312	127	127	4	4.6	0.9
0	0	1	6	15	6	5	4	0	0	0	0	0	0	0	0	0	0	0	0	0	1.58333	54	26.6	26.6	8.5	8.5	181	181	8	8	13	13	19	19	15	15	7.8	7.8	97	97	0.69	0.69	99	99	125	125	3.6	3.6	1.6
0	1	1	9	13	6	5	2	0	0	0	0	0	0	0	0	0	0	0	0	1	2.70833	75	35.1	35.1	11.2	11.2	127	127	14.2	14.2	13	14	29	29	13	13	8.3	8.3	102	102	0.95	0.95	161	161	142	142	3.2	3.8	1.2
1	1	1	10	11	6	2	3	0	0	0	0	0	0	0	0	0	0	0	0	0	2.16667	76	28.5	28.5	8.9	8.9	152	152	15.3	15.3	14	14.1	23	23	30	30	8.7	8.7	109	109	1.78	1.78	219	219	143	143	4.7	4.7	1.3
0	1	1	6	7	4	1	2	1	0	0	0	0	0	0	0	0	0	0	0	0	12.7917	47	36.7	36.7	12.2	12.2	219	219	20.1	20.1	11	11	31	31	14	14	9	9	98	98	1.77	1.77	123	123	139	139	4.3	4.3	2.2
0	1	1	2	13	6	4	3	0	0	0	0	0	0	0	0	0	0	0	0	0	1.04167	54	23.9	24.5	8.2	8.4	228	240	3.5	3.5	16	17.6	22	24	23	24	8.6	8.7	100	100	1.02	1.08	133	144	136	137	3.1	3.2	0.7
0	0	1	7	10	6	1	3	0	0	0	0	0	0	0	0	0	0	0	0	0	4.625	54	26.9	29.1	8.8	9.3	715	700	29.7	28.5	6	8	28	31	14	31	9.2	9.3	103	105	1.14	2.91	138	132	138	142	4.1	4.6	1.1
0	0	1	2	15	6	5	4	0	0	0	0	0	0	0	0	0	0	0	0	0	2.25	82	36.7	40.4	12.3	13.5	140	161	10.7	13.2	11	16	25	32	14	16	8.1	8.7	94	96	1.01	1.06	93	103	134	135	4	4.4	1
0	0	1	5	6	4	1	1	0	0	0	0	0	0	0	0	0	0	0	0	0	2.16667	55	36.2	36.2	12.1	12.1	199	199	12.5	12.5	11.3	11	24	24	11	11	9.4	9.4	107	107	0.71	0.71	132	132	141	141	3.4	3.4	1.4
0	1	2	6	9	5	1	3	0	0	0	0	0	0	0	0	0	0	0	0	0	2.375	63	33.2	33.5	10.7	10.3	157	153	14.7	13.5	10.7	10	23	23	21	21	8.7	8.7	109	109	1.07	1.07	108	108	141	141	3.7	3.7	1.2
1	0	2	8	7	4	1	2	1	0	0	0	0	0	0	0	0	0	0	0	0	3.58333	55	20.7	22.6	6.5	6.9	274	274	14.9	14.9	14	14.8	17	17	69	69	9.5	9.5	110	110	2.9	2.9	58	58	144	144	3.4	3.4	1.6
0	0	1	7	14	6	5	3	0	0	0	0	0	0	0	0	0	0	0	0	0	4.625	77	34.7	39.9	11.3	12.8	126	185	17.8	18.4	7	9	19	19	33	47	8.1	8.4	111	113	1.04	1.37	120	228	140	142	3.5	4.2	1.1
0	0	1	5	15	6	5	4	1	0	0	0	0	0	0	0	0	0	0	0	0	1.125	59	26.7	26.7	8.6	8.6	328	328	12.4	12.4	6	7	23	23	11	11	8.4	8.4	109	109	0.59	0.59	115	115	136	136	4.1	4.1	2
1	0	1	10	3	1	1	1	0	0	0	0	0	0	0	0	0	0	0	0	0	3.04167	55	33	35.5	11	11.9	142	151	29.5	29.5	13	18	12	16	18	24	6.8	7.2	103	107	0.6	1.02	177	217	129	133	3.2	4	1.8
0	0	1	4	15	6	5	4	0	0	0	0	0	0	0	0	0	0	0	0	0	1.79167	84	29.3	29.3	9.7	9.7	133	133	6	6	13	12.5	19	19	74	74	8.4	8.4	110	110	2.25	2.25	86	86	138	138	3.9	3.9	2.1
0	1	1	5	15	6	5	4	0	0	0	0	0	0	0	0	0	0	0	0	1	1.125	81	26.9	26.9	8.8	8.8	104	104	6.4	6.4	9.6	11	25	25	19	19	8.2	8.2	107	107	0.83	0.83	92	92	141	141	3.6	3.6	1.8
1	1	1	8	13	6	4	3	0	0	0	0	0	0	0	0	0	0	0	0	0	10.875	83	35.4	35.9	11.5	11.7	153	170	17.5	18.9	14	14.7	18	18	80	80	7.9	7.9	102	102	3.82	3.82	116	116	134	134	4.3	4.3	0.8
0	1	2	6	8	4	2	2	4	0	0	0	0	0	0	0	0	0	0	0	0	2.08333	65	25.1	25.1	7.6	7.6	214	214	4.1	4.1	13.6	13	21	21	23	23	8	8	106	106	1.26	1.26	85	85	137	137	4.7	4.7	1.3
0	0	1	6	15	6	5	4	0	0	0	0	0	0	0	0	0	0	0	0	0	2.20833	91	32.2	33.3	10.6	10.9	158	178	11.6	20	14	14.2	24	24	33	33	8.2	8.2	105	105	1.58	1.58	88	88	140	140	4.1	4.1	1.2
0	1	1	10	3	1	1	1	1	0	0	0	0	0	0	0	0	0	0	0	0	33.9167	63	46.2	46.2	15.6	15.6	103	103	28	28	16	16	18	18	31	31	7.9	7.9	102	102	2.65	2.65	118	118	135	135	4.6	4.6	0.5
0	0	1	4	10	5	3	2	0	0	0	0	0	0	0	0	0	0	0	0	0	1.75	42	45.3	45.3	15.4	15.4	306	306	36.6	36.6	15	16	12	12	9	9	8.1	8.1	105	105	0.52	0.52	136	136	131	131	3.3	3.3	4.1
0	0	1	8	5	3	1	1	0	0	0	0	0	0	0	0	0	0	0	0	0	1.79167	42	32.2	30.6	10.2	9.8	117	109	11.1	9.4	20	22	21	24	29	32	7.7	8	109	112	2.5	2.74	116	215	148	155	2.3	3.5	1.3
1	1	1	9	3	1	1	1	2	0	0	0	0	0	0	0	0	0	0	0	0	10.0417	60	31.2	31.2	9.8	9.8	219	219	21.6	21.6	17.6	18	16	16	35	35	7.5	7.5	105	105	2.59	2.59	232	232	135	135	4.7	4.7	1.4
0	1	2	2	15	6	5	4	0	0	0	0	0	0	0	0	0	0	0	0	0	4.79167	33	40.5	40.5	13.4	13.4	169	169	21.4	21.4	14	13.4	20	20	17	17	7.9	7.9	107	107	1.2	1.2	97	97	139	139	4.1	4.1	1.6
0	1	1	7	14	6	4	4	0	0	0	0	0	0	0	0	0	0	0	0	0	4.125	70	41.6	43.5	14.4	15	86	86	7.6	10.9	11	11	18	18	46	46	7.4	7.4	110	110	2.7	2.7	216	216	136	136	4.2	4.2	1.1
1	0	1	9	3	1	1	1	2	0	0	0	0	0	0	0	0	0	0	0	0	6.54167	68	33.6	36.9	11.2	12.1	228	247	16.8	17.12	12.7	18	21	23	31	39	8.1	8.4	108	109	0.34	1.09	116	114	143	144	3.6	4.1	2.4
0	0	1	7	14	6	5	3	1	0	0	0	0	0	0	0	0	0	0	0	0	3.91667	68	31.5	31.5	10.1	10.1	233	233	17	17	11	11	14	14	79	79	7.2	7.2	117	117	2.33	2.33	65	65	142	142	4.3	4.3	0.7
1	1	1	10	10	4	2	4	0	0	0	0	0	0	0	0	0	0	0	0	0	5.75	91	32.5	32.5	10.8	10.7	205	205	32.5	32.5	16.5	17	20	22	87	87	7.8	7.8	114	113	2.9	2.9	116	116	147	147	3.6	4.4	3.1
0	1	1	6	15	6	5	4	0	0	0	0	0	0	0	0	0	0	0	0	0	2.33333	69	37	39	12	12.5	120	131	19.8	20	16	16.8	22	22	61	62	8.5	8.5	96	97	1.33	1.46	126	129	131	132	4.6	4.7	1
1	0	1	12	3	1	1	1	1	0	0	0	0	0	0	0	0	0	0	0	0	1.5	84	24.8	33.5	7.2	9.7	122	272	14.1	17.3	16	25.5	10	20	25	36	6.7	7	107	110	1.76	2.69	140	240	142	144	3.3	4.7	2.9
0	0	2	11	14	6	5	3	2	0	0	0	0	0	0	0	0	0	0	0	1	1.70833	61	22.7	24.4	7.3	8.1	46	66	6.6	7.8	8	11.1	20	23	21	42	7.5	9.1	101	102	2.67	5.11	190	276	129	135	3.7	4.1	1
0	0	1	3	14	6	5	3	0	0	0	0	0	0	0	0	0	0	0	0	0	2.5	45	30	30	9.7	9.7	301	301	26.2	26.2	11	11	23	23	8	8	7.7	7.7	106	106	0.49	0.49	131	131	138	138	3.9	3.9	0.7
0	1	1	5	14	6	5	3	4	0	0	0	0	0	0	0	0	0	0	0	0	3.29167	65	32.2	32.2	10.9	10.9	132	132	10.7	10.7	16	19.8	12	18	53	57	7.2	7.4	103	104	4.98	5.76	226	234	130	131	5.5	5.5	0.8
0	1	1	7	12	5	4	3	0	0	0	0	0	0	0	0	0	0	0	0	0	1.45833	84	22.5	23.2	7.5	7.6	108	109	4.8	6.9	6	8	26	26	20	20	7.6	7.6	106	106	1.65	1.65	206	206	138	138	3.3	3.3	0.9
1	1	1	7	14	6	4	4	0	0	0	0	0	0	0	0	0	0	0	0	0	4.91667	86	31	31	10.1	10.1	151	151	20.9	20.9	11	10	23	23	35	35	7.8	7.8	98	98	2.56	2.56	133	133	128	128	3.8	3.8	1.3
1	1	2	17	3	1	1	1	0	0	0	0	0	0	0	0	0	0	0	0	1	6.83333	67	19.9	21.9	6.9	7.9	69	71	5.5	5.9	16.3	23	18	20	73	81	6	6.8	103	105	4.32	5.24	158	196	139	141	3.2	4.5	2.1
1	1	1	3	3	1	1	1	2	0	0	0	0	0	0	0	0	0	0	0	0	16.4583	52	24	24	7.7	7.7	546	546	25.7	25.7	22	27	20	23	16	16	7.8	7.9	102	104	0.95	1.17	122	124	135	139	4.1	4.4	1.4
0	1	1	6	7	3	2	2	0	0	0	0	0	0	0	0	0	0	0	0	0	3.95833	78	41.6	41.6	13.3	13.3	154	154	21.8	21.8	10	13	22.8	26.4	27	28	7.4	7.6	125	127	1.25	1.33	122	129	160	161	3.6	4.3	3.7
0	1	1	9	5	2	1	2	0	0	0	0	0	0	0	0	0	0	0	0	0	3.41667	66	29.2	29.2	9.8	9.8	105	105	12.3	12.3	4	10	16	24	10	14	4.9	8.8	96	116	0.38	0.63	60	103	129	136	2.4	4.7	1.7
1	1	1	5	14	6	4	4	2	0	0	0	0	0	0	0	0	0	0	0	0	1.04167	74	38	38	13.8	13.6	98	93	12.2	12.2	14	14	23	22	41	41	7.8	7.8	76	76	1.8	1.8	156	156	110	110	4.1	4.1	2.6
0	1	1	4	10	6	1	3	0	0	0	0	0	0	0	0	0	0	0	0	0	4.45833	76	36	36	11.5	11.5	265	261	9.7	9.7	6	8	20	21	21	21	8.2	8.3	109	109	0.7	0.7	143	143	140	140	3.7	3.8	1.4
0	1	1	3	5	1	1	3	0	0	0	0	0	0	0	0	0	0	0	0	0	1.04167	58	38.8	38.8	12.9	14.2	245	239	11.6	11.6	6	7	32	34	13	13	8.2	8.1	104	104	1.3	1.3	148	148	142	142	4.1	4.1	1
0	1	1	5	15	6	5	4	0	0	0	0	0	0	0	0	0	0	0	0	0	2.625	87	44.8	44.8	14.9	14.9	142	142	16.6	16.6	11	11	20	20	36	36	8.5	8.5	111	111	1.1	1.1	121	104	140	140	4.1	4.1	2.7
1	1	2	7	3	1	1	1	4	0	0	0	0	0	0	0	0	0	0	0	0	1.54167	88	26.9	26.9	8.7	8.7	153	153	28	28	16.3	21	9	22	47	52	6.9	8.1	111	115	2.32	2.49	22	185	140	152	4.4	5.6	6.1
0	1	1	5	3	1	1	1	0	0	0	0	0	0	0	0	0	0	0	0	0	19.2917	74	27	27	8.9	8.9	336	336	15	15	11.8	11	22	22	8	8	7.8	7.8	100	100	0.88	0.88	201	201	132	132	3.9	3.9	1.5
1	0	1	7	10	5	1	4	0	0	0	0	0	0	0	0	0	0	0	0	0	3.45833	58	30.5	30.5	10.3	10.3	100	100	0.7	0.7	17.5	17.5	15	15	42	42	7.1	7.1	96	96	1.84	1.84	56	56	124	124	4	4	3.6
1	1	1	10	6	1	3	2	2	0	0	0	0	0	0	0	0	0	0	0	0	2.20833	76	36.8	36.8	11	11.2	95	92	7.7	7.7	14.5	17.1	25	27	70	70	8	8	132	131	2.3	2.3	152	152	170	170	3.4	3.5	2.3
0	1	1	4	15	6	5	4	0	0	0	0	0	0	0	0	0	0	0	0	0	3.83333	67	30.6	30.6	10.4	10.4	370	370	19.4	19.4	16	13	27	27	20	20	8.2	8.2	98	98	0.87	0.87	176	176	136	136	3.8	3.8	2.9
0	0	1	7	8	4	2	2	6	0	0	0	0	0	0	0	0	0	0	0	0	1.875	58	26.8	29.1	8.7	9.5	154	167	14	43.38	13.5	12	17.4	17.4	33	33	6.5	6.5	121	121	2.17	2.17	103	103	151	151	2.8	3.1	1.6
0	1	2	3	12	6	5	1	1	0	0	0	0	0	0	0	0	0	0	0	0	1.08333	74	30.9	30.9	10.4	10.4	150	150	7.5	7.5	12	11	22	22	49	49	8.9	8.9	114	114	1.22	1.22	95	95	145	145	4.3	4.3	0.6
0	0	1	2	9	5	1	3	0	0	0	0	0	0	0	0	0	0	0	0	0	2.875	55	37.7	39.5	12.7	12.8	196	243	24.1	31.6	9	14	5	11	15	19	6.7	8	112	120	1.37	1.7	125	214	134	142	3.3	3.7	0.9
0	0	1	2	15	6	5	4	2	0	0	0	0	0	0	0	0	0	0	0	0	2.375	52	35.9	35.9	12	12	136	136	5	5	9.9	9	23	23	8	8	8.6	8.6	109	109	0.75	0.75	166	166	140	140	3.7	3.7	1.2
0	1	3	10	9	5	1	3	0	0	0	0	0	0	0	0	0	0	0	0	0	1.875	72	31.5	35.4	10.4	11.8	192	179	22.2	21.8	13.2	13.3	18	19	55	54	8.2	8.1	111	109	1.18	0.7	114	106	142	140	4.8	4.6	2.1
0	1	3	7	14	6	4	4	0	0	0	0	0	0	0	0	0	0	0	0	0	3	76	34.2	34.2	10.7	10.7	258	258	10.3	10.3	9	9	21	21	29	29	8.3	8.3	114	114	1.45	1.45	119	119	144	144	4.9	4.9	1.3
1	1	3	9	6	4	1	1	0	0	0	0	0	0	0	0	0	0	0	0	0	6.375	80	33.7	35.6	11.6	12.2	150	145	5.86	6.4	16	17	17	18	37	49	7	7.6	91	94	2.38	3.7	104	104	126	127	4.1	4.6	1.7
0	1	1	5	15	6	5	4	0	0	0	0	0	0	0	0	0	0	0	0	0	1.04167	87	36.7	36.7	12.2	12.2	185	185	9	9	10	10	21	21	24	24	8.2	8.2	109	109	0.79	0.79	114	114	140	140	3.9	3.9	1.2
0	1	3	11	14	6	4	4	1	0	0	0	0	0	0	0	0	0	0	0	0	2	62	34.3	34.3	11.7	11.7	162	162	18.8	18.8	14	14	18	18	57	57	7.1	7.1	97	97	1.71	1.71	197	197	129	129	4.4	4.4	6.2
0	0	3	11	11	5	4	2	3	0	0	0	0	0	0	0	0	0	0	0	0	6.66667	58	35.9	35.9	12.3	12.3	217	217	30.6	30.6	8	8	20	20	47	47	7.6	7.6	111	111	1.45	1.45	161	161	139	139	3.4	3.4	2
0	0	3	8	14	6	4	4	1	0	0	0	0	0	0	0	0	0	0	0	0	1.625	84	23.2	23.2	7.4	7.4	483	483	16.7	16.7	11	11	22	22	47	47	8.2	8.2	101	101	2.45	2.45	137	137	134	134	4.2	4.2	1.4
0	0	1	8	15	6	5	4	1	0	0	0	0	0	0	0	0	0	0	0	0	3.83333	89	32.7	26.6	8.9	7	193	181	5.2	3.2	12.8	13	22	22	31	34	8.1	8.3	101	109	1.3	1.42	89	160	134	138	3.2	3.3	2.7
0	0	3	11	15	6	5	4	0	0	0	0	0	2	0	0	0	0	0	0	0	2.95833	77	34.4	34.4	11.5	11.5	202	202	36.1	36.1	12	12	17	17	42	42	7.2	7.2	104	104	1.71	1.71	131	131	133	133	3.7	3.7	1.4
0	0	4	6	13	6	4	3	0	0	0	0	0	0	0	0	0	0	0	0	0	7.41667	78	26.7	26.7	8.6	8.6	240	240	4.5	4.5	8	8	18	18	38	38	8.5	8.5	111	111	1.56	1.56	64	64	137	137	4.3	4.3	1.8
0	0	1	12	14	6	5	3	0	0	0	0	0	0	0	0	0	0	0	0	1	3.625	61	30.1	33.7	10.1	11.1	119	125	15.2	17	23	23	11	11	174	174	6.9	6.9	97	97	9.94	9.94	202	202	131	131	4.9	4.9	1.9
1	0	3	12	11	5	2	4	3	0	0	0	0	0	0	0	0	0	0	0	0	1.41667	88	35	35	11.2	11.2	71	71	0.6	0.6	3	4	28	31	46	47	8.3	9	106	107	1.67	1.72	196	219	137	142	5.1	5.2	1
1	1	2	12	3	1	1	1	0	0	0	0	0	0	0	0	0	0	0	0	0	14.7083	75	37.7	37.7	11.5	11.5	106	106	30.8	30.8	3	3	29	29	55	55	7.8	7.8	112	112	0.97	0.97	105	105	144	144	4.4	4.4	0.7
0	0	1	7	15	6	5	4	1	0	0	0	0	0	0	0	0	0	0	0	0	1.25	65	21.6	21.6	7.3	7.3	216	216	2.7	2.7	10	11	20	20	16	17	7.9	7.9	111	111	0.65	0.68	120	125	141	142	4.6	4.6	0.6
0	1	4	5	12	6	5	1	0	0	0	0	0	0	0	0	0	0	0	0	0	1.04167	74	27.3	27.3	7.7	7.7	283	283	9.7	9.7	8	8	26	26	39	39	9.4	9.4	117	117	0.7	0.7	160	160	151	151	3.3	3.3	2.1
1	0	3	6	12	4	4	4	0	0	0	0	0	0	0	0	0	0	0	0	0	7.91667	75	28.1	28.1	9.3	9.3	377	377	18.1	18.1	6	6	26	26	37	37	7.6	7.6	100	100	2.37	2.37	331	331	132	132	5	5	1.7
0	1	1	4	15	6	5	4	0	0	0	0	0	0	0	0	0	0	0	0	0	1.875	53	36.1	36.1	11.9	11.9	277	277	8.8	8.8	5	5	28	28	17	17	8.8	8.9	96	96	1.06	1.06	143	143	129	129	4.1	4.1	1.4
0	1	3	8	14	6	4	4	4	0	0	0	0	0	0	0	0	0	0	0	0	2.375	85	38.9	38.9	13	13	130	130	10.3	10.3	7	7	26	26	14	14	7.7	7.7	110	110	0.93	0.93	95	95	143	143	4	4	2.3
0	0	3	10	10	5	2	3	0	0	0	0	0	0	0	0	0	0	0	0	0	1.20833	88	37.9	37.9	12.8	12.8	211	211	10.7	10.7	7	7	22	22	19	19	8.8	8.8	112	112	1.16	1.16	93	93	141	141	4.9	4.9	1.9
0	1	1	9	11	6	1	4	1	0	0	0	0	0	0	0	0	0	0	0	0	6.5	91	33.4	36.7	9.8	10.4	205	244	13.1	18.3	3	3	28	29	38	48	8.4	8.4	106	108	1.43	2.22	90	124	138	139	4.4	5.1	0.7
0	0	3	9	15	6	5	4	0	0	0	0	0	0	0	0	0	0	0	0	0	1.33333	46	19.3	23.4	7	8.4	19	40	0.03	0.13	8	8	22	22	11	11	8.1	8.1	109	109	0.58	0.58	99	99	139	139	3.5	3.5	1.9
0	1	3	9	15	6	5	4	0	0	0	0	0	0	0	0	0	0	0	0	1	1.5	57	31.1	31.1	9.6	9.6	419	419	14.2	14.2	10	10	29	29	40	40	8.5	8.5	97	97	8.6	8.6	197	197	136	136	3.4	3.4	1.7
0	1	3	9	14	6	4	4	0	0	0	0	0	0	0	0	0	0	0	0	1	1.20833	57	32.6	32.6	10.4	10.4	188	188	45.9	45.9	24	24	18	18	67	67	7.6	7.6	96	96	8.3	8.3	266	266	138	138	4.9	4.9	3.9
1	1	3	10	15	6	5	4	3	0	0	0	0	0	0	0	0	0	0	0	0	2.20833	78	22.8	24.5	7.8	8.1	32	36	3.2	9.4	8	8	22	22	36	36	7	7.6	110	110	1.8	1.8	116	116	140	140	4.1	4.1	0.4
0	1	3	8	14	6	4	4	2	0	0	0	0	0	0	0	0	0	0	0	0	1.625	88	30.5	30.5	10	10	116	116	10.8	10.8	7	7	23	23	38	38	7.2	7.2	112	112	1.7	1.7	93	93	142	142	3.9	3.9	1.7
0	1	3	11	15	6	5	4	3	0	0	0	0	0	0	0	0	0	0	0	0	2.5	81	30.8	30.8	10.7	10.7	242	242	9.3	9.3	10	10	24	24	40	40	7.7	7.7	102	102	1.64	1.64	135	135	136	136	3.4	4.2	1.3
0	0	1	5	15	6	5	4	0	0	0	0	0	0	0	0	0	0	0	0	0	1.25	60	31.5	37.5	10.6	12.7	259	259	12.4	12.4	6	12	23	25	3	6	7.2	7.4	108	109	0.44	0.55	116	142	140	143	2.7	2.9	2.8
0	0	1	7	15	6	5	4	0	0	0	0	0	0	0	0	0	0	0	0	0	1.20833	60	32.2	32.2	10.6	10.6	255	255	14.7	14.7	8	8	30	30	15	15	6.6	6.6	109	109	0.93	0.93	121	121	147	147	2.8	2.8	1.8
1	0	2	7	3	1	1	1	0	0	0	0	0	0	0	0	0	0	0	0	0	9.66667	56	38.8	38.8	13	13	108	108	3.7	3.7	8	8	22	22	17	17	8.3	8.3	117	117	0.76	0.76	122	122	147	147	3.4	4.5	1.5
0	1	1	9	15	6	5	4	0	0	0	0	0	0	0	0	0	0	0	0	0	1.91667	55	34.3	34.3	11.6	11.6	146	146	15.7	15.7	9	9	18	18	21	21	7.9	7.9	110	110	1.41	1.41	105	105	137	137	3.9	3.9	1.5
0	0	3	5	15	6	5	4	1	0	0	0	0	0	0	0	0	0	0	0	0	2.375	66	35.6	36.9	12	12.4	96	90	12.5	13.91	14	14	21	20	19	17	8.5	8.5	109	110	1.13	0.7	124	166	142	144	3.6	3.6	2.5
1	1	3	15	11	6	1	4	4	0	0	0	0	0	0	0	0	0	0	0	0	1.5	85	29	29	9.1	9.1	150	150	3.5	3.5	16	22	11	22	40	47	7.2	7.7	100	103	3.42	3.57	103	130	134	138	3.5	4.6	13.7
1	1	3	12	11	2	5	4	2	0	0	0	0	0	0	0	0	0	0	0	1	5.08333	80	29.9	29.9	9.2	9.2	268	268	20.2	20.2	2	9	23	28	39	40	8.2	8.2	120	122	1.38	1.39	90	154	150	154	3.8	4.1	1
0	1	1	13	14	6	4	4	2	0	0	0	0	0	0	0	0	0	0	0	0	3.08333	80	31	31	10.4	10.4	86	86	9.28	9.28	11	11	19	19	70	70	7.6	7.6	112	112	4.32	4.32	142	142	142	142	4.4	4.4	1.3
0	1	1	5	15	6	5	4	0	0	0	0	0	0	0	0	0	0	0	0	0	1	70	34.3	34.3	11.2	11.2	108	108	7.8	7.8	4	4	28	28	10	10	8	8	106	106	0.59	0.59	140	140	138	138	4.1	4.1	1
0	1	4	8	6	3	1	2	0	0	0	0	0	0	0	0	0	0	0	0	0	4.66667	80	39.2	39.2	11.6	11.6	93	93	19.7	19.7	4	4	29	29	74	74	8	8	135	135	0.91	0.91	104	104	167	168	3.2	3.5	0.8
0	0	3	10	6	4	1	1	0	0	0	0	0	0	0	0	0	0	0	0	0	1.91667	71	34.1	34.1	11.5	11.5	73	73	30.4	30.4	12	12	21	21	77	77	6.7	6.7	110	110	1.81	1.81	86	86	143	143	3.6	3.6	1.8
1	0	1	11	15	6	5	4	3	0	0	0	0	0	0	0	0	0	0	0	0	3.33333	73	33.5	33.5	11.9	11.9	68	68	7.9	7.9	12	12	19	19	19	19	7.5	7.5	98	98	0.95	0.95	168	168	129	129	3.2	3.2	2.4
0	0	3	8	15	6	5	4	2	0	0	0	0	0	0	0	0	0	0	0	0	2.33333	78	31.9	31.9	10.2	10.2	244	244	24.67	24.67	10	10	21	21	30	30	8	8	108	108	1.9	1.9	184	184	139	139	2.8	3.7	0.9
0	0	3	18	6	4	1	1	3	0	0	0	0	0	0	0	0	0	0	0	0	16.125	85	29.5	29.5	9.8	9.8	55	55	16.08	16.08	14	17	12	15	21	24	6.9	7.2	112	117	1.69	2.02	181	260	140	146	4	4.8	7.6
0	0	1	10	13	5	4	4	1	0	0	0	0	0	0	0	0	0	0	0	0	3.125	82	24.1	24.1	8.1	8.1	114	114	20.2	20.2	16	16	23	23	106	106	7.1	7.1	105	105	2.92	2.92	112	112	144	144	3.5	3.5	1.8
1	1	3	13	6	4	1	1	4	1	0	0	0	0	0	0	0	0	0	0	0	5.45833	89	46.6	46.6	13	13	879	879	28.9	28.9	8	11	22	24	37	37	8	8	109	109	2.27	2.38	106	115	141	142	5.2	5.6	2.4
0	0	3	7	15	6	5	4	2	0	0	0	0	0	0	0	0	0	0	0	0	1.66667	53	27.4	32.4	9	10.6	174	192	4.9	6	6	8	25	26	13	19	8	8.9	104	105	0.42	0.46	302	367	137	137	3.6	4.3	0.7
1	1	3	13	6	4	1	1	2	0	0	0	0	0	0	0	0	0	0	0	0	21.8333	74	25.1	27.5	8	9.1	277	307	18.83	26.77	9	19	18	25	84	110	7.5	7.7	95	100	1.46	2.37	192	316	132	134	3.1	3.4	1.1
0	0	1	10	10	5	1	4	0	0	0	0	0	0	0	0	0	0	0	0	0	10.1667	84	36.4	36.4	12.4	12.4	282	282	18.95	18.95	14	14	22	22	42	42	8.3	8.3	104	104	3.2	3.2	117	117	140	140	3	3	1.5
0	1	3	11	15	6	5	4	3	0	0	0	0	0	0	0	0	0	0	0	0	2	53	31.8	31.8	10.7	10.7	193	193	11.3	11.3	9	9	23	23	21	21	7.6	7.6	105	105	0.93	0.93	125	125	137	137	4.5	4.5	1
0	1	3	8	14	6	4	4	0	0	0	0	0	0	0	0	0	0	0	0	0	6.91667	80	23.6	23.6	8.1	8.1	296	296	17.2	17.2	12	12	20	20	74	74	7.9	7.9	107	107	6.72	6.72	92	92	139	139	4.6	4.6	1.3
0	1	3	11	15	6	5	4	1	0	0	0	0	0	0	0	0	0	0	0	0	3.16667	58	30.4	30.4	10.3	10.3	110	110	16.1	16.1	10	10	17	17	103	103	8.1	8.1	109	109	4.24	4.24	132	132	136	136	5.3	5.3	1
0	0	3	10	7	4	1	2	1	0	0	0	0	0	0	0	0	0	0	0	0	2.25	75	29.1	30.5	9.4	10.2	198	198	5.8	5.8	6	6	24	24	14	14	7.6	7.6	114	114	0.48	0.48	143	143	144	144	3.6	3.6	0.7
0	0	3	5	15	6	5	4	1	0	0	0	0	0	0	0	0	0	0	0	0	1.08333	67	28.6	31	9.4	10.3	215	215	15.1	15.1	9	9	20	20	29	29	8.3	8.3	105	105	0.49	0.49	75	75	134	134	3.7	3.7	0.7
0	0	3	10	10	4	2	4	0	0	0	0	0	0	0	0	0	0	0	0	0	5.08333	80	24.8	24.8	7.9	7.9	274	274	14	14	8	11	20	20	11	12	8.1	8.1	112	112	0.89	0.89	74	76	140	143	3.6	4.1	1.1
0	1	3	11	15	6	5	4	2	0	1	0	0	0	0	0	0	0	0	0	0	1.70833	71	23	23	7.9	7.9	109	109	0.2	0.2	12	12	22	22	18	18	7.2	7.2	92	92	1.17	1.17	235	235	126	126	4.5	4.5	1.7
0	0	4	6	12	6	3	3	0	0	0	0	0	0	0	0	0	0	0	0	0	1.04167	85	30.4	30.4	9.8	9.8	160	160	16.5	16.5	9	9	28	28	51	51	9.3	9.3	104	104	1.5	1.5	78	78	141	141	3.7	3.7	2
0	0	4	6	14	6	4	4	0	0	0	0	0	0	0	0	0	0	0	0	0	2.125	85	27.1	27.1	8.1	8.1	259	259	7.7	7.7	6	6	34	34	39	39	8.3	8.3	95	95	1.4	1.4	329	329	135	135	4.4	4.4	1
0	0	1	11	13	5	4	4	0	0	0	0	0	0	0	0	0	0	0	0	0	5.45833	83	23.8	23.8	8	8	62	62	0.3	0.3	6	6	27	27	15	15	7.7	7.7	99	99	0.8	0.8	97	97	132	132	3	3	2.2
0	1	3	8	14	6	4	4	0	0	0	0	0	0	0	0	0	0	0	0	0	1.16667	87	26.8	26.8	9.2	9.2	146	146	5.8	5.8	8	8	21	21	67	67	9.7	9.7	114	114	1.6	1.6	104	104	143	143	5.6	6.1	1.7
0	0	3	10	14	6	4	4	0	0	0	0	0	0	0	0	0	0	0	0	0	1.91667	85	26.9	26.9	8.3	8.3	240	240	8.3	8.3	7	7	23	23	31	31	7.8	7.8	111	111	1.57	1.57	100	100	141	141	4.3	4.3	1.1
0	1	3	7	12	5	4	3	0	0	2	0	0	0	0	0	0	0	0	0	0	2.45833	68	32	31.6	10.7	10.4	159	153	7.7	7.9	10	9	28	27	21	20	9.9	9.6	101	95	1.1	1.2	132	165	136	133	4.2	3.9	2.4
0	1	2	14	11	5	2	4	2	0	1	0	0	0	0	0	0	0	0	0	0	3.66667	59	25	28.5	8.6	9.6	17	25	0.15	0.24	7	12	24	29	13	18	6.8	7.8	85	93	0.97	1.39	127	158	121	132	3.4	4.2	2.5
0	0	3	8	15	6	5	4	0	0	0	0	0	0	0	0	0	0	0	0	0	1.79167	91	34	34	11.2	11.2	141	141	6.5	6.5	7	7	26	26	33	33	7.9	7.9	108	108	1.12	1.12	99	99	141	141	3.6	3.6	1.6
0	1	3	6	14	6	4	4	0	0	0	0	0	0	0	0	0	0	0	0	0	1.83333	91	41.5	41.5	13.6	13.6	178	178	7.4	7.4	9	9	26	26	20	20	8.8	8.8	104	104	0.9	0.9	302	302	139	139	4	4.5	2.2
0	1	3	11	10	4	2	4	0	0	0	0	0	0	0	0	0	0	0	0	0	3.5	87	30.5	31	9.9	10.3	89	99	8.7	9.6	12	12	17	19	100	113	6.8	7.5	111	116	5.6	6.3	87	93	142	145	5.2	5.6	2.8
1	1	3	11	9	4	1	4	3	0	0	0	0	0	0	0	0	0	0	0	0	3.66667	91	35.1	35.1	11.6	11.6	107	107	25.2	25.2	12	12	16	16	27	27	7.5	7.5	113	113	2.56	2.56	96	96	141	141	4.7	4.7	7.3
0	1	1	12	6	1	1	4	2	0	0	0	0	0	0	0	0	0	0	0	1	4.5	59	32.3	33.6	10.8	10.8	244	251	14.5	14.9	13	22	17	26	42	84	6.6	7.7	93	100	4.03	8.71	148	275	135	139	4	5.4	9.7
0	1	1	12	15	6	5	4	0	0	0	0	0	0	0	0	0	0	0	0	0	1.875	65	33.3	33.3	11.8	11.8	82	82	8.5	8.5	9	9	23	23	24	24	8.2	8.2	97	97	0.84	0.84	238	238	129	129	4.3	4.3	2.1
0	0	1	7	9	4	1	4	0	0	0	0	0	0	0	0	0	0	0	0	0	5.54167	20	25.8	25.8	9	9	94	94	6.51	6.51	8	8	25	25	2	2	7.3	7.3	108	108	0.28	0.28	108	108	141	141	2.2	2.2	0.6
1	1	1	6	15	6	5	4	0	0	0	0	0	0	0	0	0	0	0	0	0	2.58333	80	37.7	37.7	11.8	11.8	196	196	12.8	12.8	10	12	21	24	23	24	8.1	8.4	109	112	1.82	1.83	96	109	143	145	4.5	4.7	1.8
0	1	1	10	15	6	5	4	3	0	0	0	0	0	0	0	0	0	0	0	0	2.04167	83	23.6	24.6	7.6	7.9	289	289	12	12	7	7	20	20	34	34	7.5	7.5	111	111	1.54	1.54	112	112	138	138	3.7	3.7	1.1
0	0	3	9	11	5	2	4	1	0	0	0	0	0	0	0	0	0	0	0	0	1.5	87	33.2	33.2	10.2	10.2	193	193	13.1	13.1	10	10	17	17	53	53	8.4	8.4	133	133	1.76	1.76	122	122	160	160	3.4	3.4	2.7
0	0	4	11	15	6	5	4	1	0	0	0	0	0	0	0	0	0	0	0	1	1.625	82	28.1	28.1	9	9	129	129	30.1	30.1	7	7	23	23	19	19	7.4	7.4	99	99	2.72	2.72	120	120	129	129	4.5	4.5	2.1
0	0	3	8	15	6	5	4	0	0	0	0	0	0	0	0	0	0	0	0	0	1.70833	67	26.2	26.2	8.9	8.9	148	148	18.5	18.5	5	5	20	20	25	25	6.6	6.6	117	117	1.17	1.17	154	154	142	142	4.4	4.4	0.7
0	1	4	18	15	6	5	4	3	0	0	0	0	0	0	0	0	0	0	0	1	8	45	31.5	32.9	10.4	10.8	46	65	12.85	15.29	15	17	22	23	74	76	8.8	8.9	95	96	9.15	9.56	70	109	133	135	4.8	5.7	6
0	0	3	5	15	6	5	4	0	0	0	0	0	0	0	0	0	0	0	0	0	1.5	69	42.3	42.3	14.7	14.7	233	233	34.6	34.6	8	8	18	18	18	18	7.7	7.7	111	111	1.19	1.19	134	134	137	137	3.7	3.7	1.5
1	0	1	5	8	4	2	2	0	0	0	0	0	0	0	0	0	0	0	0	0	4.95833	91	25.6	25.6	8.4	8.4	208	208	7.2	7.2	9	9	22	22	71	71	9	9	116	116	1.77	1.77	107	107	147	147	4.7	4.7	2.8
0	1	3	8	15	6	5	4	1	0	0	0	0	0	0	0	0	0	0	0	0	2.375	56	29.3	32.1	10.4	11.6	208	229	11.9	17.8	8	8	23	23	13	13	8	8	104	104	0.87	0.87	257	257	135	135	4.1	4.1	1
1	1	3	14	9	4	3	2	0	0	0	0	0	0	0	0	0	0	0	0	0	2.45833	71	22	26.3	7.7	9.2	22	57	10.6	13.5	11	14	16	18	41	51	7.5	7.9	103	117	1.15	1.34	82	119	135	144	5.3	5.5	1.6
0	0	1	6	14	6	4	4	0	0	0	0	0	0	0	0	0	0	0	0	0	1.79167	83	34.9	34.9	10.7	10.7	394	394	12.5	12.5	11	11	18	18	30	30	8.9	8.9	118	118	0.68	0.68	87	87	147	147	4.2	4.2	2.6
0	0	3	13	10	5	3	2	4	0	0	0	0	0	0	0	0	0	0	0	0	4.5	91	22.2	27.6	6.7	8.6	124	196	16.7	21.1	11	13	16	18	74	76	6.2	6.4	134	139	1.77	1.87	93	137	161	170	3.9	4	1
1	1	3	16	3	1	1	1	1	0	0	0	0	0	0	0	0	0	0	0	0	1.95833	80	24.9	26.6	8.7	9.6	126	127	16.6	21.9	13	14	19	19	53	55	8.6	8.6	90	93	1.4	1.6	82	89	123	125	5.3	5.8	3.4
0	1	1	11	7	4	2	1	0	0	0	0	0	0	0	0	0	0	0	0	0	1.83333	91	33.5	33.5	11.9	11.9	72	72	22.1	22.1	17	17	13	13	71	71	7.7	7.7	116	116	3.6	3.6	40	40	146	146	5.6	5.6	2.4
0	1	3	9	8	4	1	3	0	0	0	0	0	0	0	0	0	0	0	0	0	1.91667	84	32.5	32.5	11.2	11.2	196	196	17.2	17.2	8	12	20	28	41	45	7.2	7.9	90	96	2.44	3.38	100	118	122	132	4.1	5.6	1.1
0	1	3	9	9	4	3	2	3	0	0	0	0	0	0	0	0	0	0	0	0	6.91667	86	43.2	43.2	14.2	14.2	126	126	9.4	9.4	8	8	26	26	25	25	7.3	7.3	111	111	0.7	0.7	155	155	145	145	4	4	0.9
1	1	1	12	15	6	5	4	2	0	0	0	0	0	0	0	0	0	0	0	0	3.625	87	30	30	10.1	10.1	286	286	15.49	15.49	10	10	26	26	37	37	8	8	104	104	1.52	1.52	107	107	140	140	4.2	4.2	2
0	1	1	5	15	6	5	4	0	0	0	0	0	0	0	0	0	0	0	0	0	1	86	28.7	28.7	9.4	9.4	169	169	9.4	9.4	4	4	30	30	26	26	8.2	8.2	107	107	0.71	0.71	94	94	141	141	4.3	4.3	0.8
0	1	1	11	14	6	5	3	2	0	0	0	0	0	0	0	0	0	0	0	0	2.16667	87	21.1	21.1	7.1	7.1	224	224	10	10	6	6	27	27	20	20	7.8	7.8	104	104	0.78	0.78	86	86	137	137	3.7	4.3	0.9
0	1	2	8	7	5	1	1	0	0	0	0	0	0	0	0	0	0	0	0	0	2.58333	86	23.4	23.4	8.3	8.3	234	234	13	13	9	9	20	20	30	39	7.5	7.6	99	105	1.9	3.2	117	232	128	134	3.7	4.6	2.5
0	1	3	13	7	5	1	1	0	0	0	0	0	0	0	0	0	0	0	0	0	1.125	86	34.2	34.2	11.4	11.4	117	117	12.1	12.1	6	6	28	28	16	16	7.5	7.5	108	108	1	1	110	110	142	142	3.9	3.9	1.4
0	1	3	11	14	6	4	4	1	0	0	0	0	0	0	0	0	0	0	0	0	2.83333	91	30.6	30.6	10.6	10.6	301	301	34.2	34.2	13	14	19	21	74	87	8.8	8.8	99	101	5.55	6.13	111	237	132	134	5.4	6.2	2.6
0	1	3	8	15	6	5	4	2	0	0	0	0	0	0	0	0	0	0	0	0	9.66667	53	25.1	28	8.1	8.8	343	354	12.23	16.8	8	9	21	23	11	18	7.8	7.9	103	104	0.56	0.69	99	166	132	136	3.6	4.1	1.1
0	1	2	10	13	5	4	4	0	0	0	0	0	0	0	0	0	0	0	0	0	1.58333	40	29.4	29.4	9.3	9.3	639	639	23.9	23.9	8	8	25	25	40	40	7.6	7.6	114	114	0.78	0.78	69	69	147	147	3.6	3.6	0.55
0	1	3	12	13	6	4	3	1	0	0	0	0	0	0	0	0	0	0	0	0	3.75	82	29.2	29.2	8.6	8.6	243	243	7.9	7.9	4	4	32	32	18	18	7.7	7.7	104	104	0.68	0.68	141	141	140	140	3.7	3.7	0.4
0	1	3	12	10	6	1	3	2	0	0	0	0	0	0	0	0	0	0	0	0	17.7083	82	38.8	38.8	12.4	12.4	204	204	26.9	26.9	13	13	15	15	53	53	8	8	111	111	3.28	3.28	169	169	139	139	4	4	1.8
1	1	3	7	14	6	5	3	1	0	0	0	0	0	0	0	0	0	0	0	0	5.25	87	20.3	22.7	6.6	7.4	227	241	21.8	29.32	4	12	23	28	20	24	8	8.2	94	99	0.78	0.8	157	159	129	131	4.1	4.1	1.5
0	1	3	9	15	6	5	4	2	0	0	0	0	0	0	0	0	0	0	0	0	1.41667	81	27.5	27.5	9.7	9.7	152	152	21.49	21.49	7	7	26	26	24	24	7.9	7.9	106	106	1.31	1.31	135	135	139	139	3.4	3.4	2.6
0	1	3	5	10	3	4	3	0	0	0	0	0	0	1	0	0	0	0	0	0	3	82	30	30	9.7	9.7	372	372	10.9	10.9	5	5	26	26	12	12	7.3	7.3	107	107	0.4	0.4	175	175	138	138	4.4	4.4	1.7
0	1	3	7	15	6	5	4	0	0	0	0	0	0	0	0	0	0	0	0	0	6.58333	44	30.8	30.8	10.2	10.2	214	214	4.5	4.5	8	8	25	25	17	17	7.6	7.6	99	99	0.61	0.61	83	83	132	132	3.5	3.5	1
0	0	3	6	10	4	4	2	0	0	0	0	0	0	0	0	0	0	0	0	1	2.625	76	36	39.2	10.8	12	46	53	5.86	6.9	10	8	38	36	58	89	9.8	9.7	115	111	3.26	2.83	154	114	157	154	4.5	4.1	1
0	1	3	11	15	6	5	4	0	0	0	0	0	0	0	0	0	0	0	0	0	3.91667	70	31.7	32.6	10.5	10.8	150	157	18.4	27.5	9	13	23	26	25	29	7	7.2	88	92	1.5	1.9	124	160	123	127	4.1	5.4	1.3
1	0	3	6	14	6	4	4	0	0	0	0	0	0	0	0	0	0	0	0	0	2.29167	86	24.5	27.9	7.9	8.9	375	375	10.36	10.36	9	9	19	19	26	26	8.8	8.8	110	110	1.42	1.42	91	91	138	138	4.2	4.2	1.7
0	1	3	10	7	3	1	3	0	0	0	0	0	0	0	0	0	0	0	0	0	1.54167	89	32.6	32.6	10.3	10.3	121	121	30.2	30.2	6	6	29	29	47	47	8.4	8.4	120	120	1.93	1.93	116	116	155	155	4.9	4.9	2.3
0	1	3	8	10	5	1	4	0	0	0	0	0	0	0	0	0	0	0	0	0	1.66667	75	30.4	30.4	10.2	10.2	148	148	10.8	10.8	5	5	26	26	27	27	7.8	7.8	110	110	0.53	0.53	96	96	141	141	4	4	1.5
0	1	3	9	12	4	4	4	0	0	0	0	0	0	0	0	0	0	0	0	0	2.375	88	26	26	8.4	8.4	390	390	23.4	23.4	12	12	26	26	63	63	8.4	8.4	102	102	1.2	1.2	110	110	140	140	5.2	5.2	2.6
0	0	4	5	14	6	4	4	0	0	0	0	0	0	0	0	0	0	0	0	0	3.79167	84	30.1	30.1	10.2	10.2	182	182	12.4	12.4	8	8	27	27	20	20	7.8	7.8	105	105	0.45	0.45	87	87	140	140	3.3	3.3	1
0	0	3	7	12	4	4	4	0	0	0	0	0	0	0	0	0	0	0	0	0	1.625	89	40.5	40.5	13	13	256	256	17.99	17.99	8	8	18	18	28	28	8.6	8.6	114	114	1.59	1.59	149	149	140	140	4.4	4.4	2.9
0	0	3	6	15	6	5	4	0	0	0	0	0	0	0	0	0	0	0	0	0	7.33333	40	29.8	29.8	9.9	9.9	29	29	57.2	57.2	11	11	25	25	12	12	9	9	93	93	0.24	0.24	57	57	129	129	4.3	4.3	1.6
0	0	3	5	15	6	5	4	0	0	0	0	0	0	0	0	0	0	0	0	0	2.16667	40	26.2	26.2	8.6	8.6	301	301	25.7	25.7	9	9	24	24	5	5	8.2	8.2	102	102	0.43	0.43	98	98	135	135	3.3	3.3	2
0	0	3	11	13	6	4	3	0	0	0	0	0	0	0	0	0	0	0	0	0	6.58333	84	38.3	38.3	13.2	13.2	89	89	89.06	89.06	15	15	15	15	36	36	8.8	8.8	112	112	2.83	2.83	85	85	142	142	4.6	4.6	5.4
0	1	3	10	12	5	4	3	2	0	0	0	0	0	0	0	0	0	0	0	0	1.95833	89	39.9	39.9	12.5	12.5	123	123	11.1	11.1	7	8	23	27	23	25	7.8	7.9	106	111	0.87	1.13	105	133	140	142	3.7	3.9	1.3
0	1	3	9	10	4	4	2	0	0	0	0	0	0	0	0	0	0	0	0	0	5.83333	87	19.4	21.2	6.6	7.4	31	35	13.1	14.3	5	5	25	25	44	44	8.7	8.7	109	109	1.44	1.44	114	114	139	139	3.8	3.8	1
0	0	3	5	15	6	5	4	2	0	0	0	0	0	0	0	0	0	0	0	0	1.20833	88	28.8	28.8	9.3	9.3	363	363	10.6	10.6	9	9	19	19	28	28	7.9	7.9	111	111	1.1	1.1	139	139	139	139	4.1	4.1	1.6
0	1	2	12	15	6	5	4	2	0	0	0	0	0	0	0	0	0	0	0	0	4	27	35	35	11.9	11.9	139	139	16.5	16.5	9	9	25	25	29	29	8.1	8.1	102	102	1.54	1.54	85	86	136	136	4	4	1.6
0	0	3	14	10	6	1	3	3	0	0	0	0	0	0	0	0	0	0	0	0	3.91667	32	27.1	27.1	8.6	8.6	92	92	23.9	23.9	6	6	20	20	21	21	6.6	6.6	108	108	0.64	0.64	176	176	134	134	4.5	4.5	1
0	1	1	7	11	6	1	4	0	0	1	0	0	0	0	0	0	0	0	0	0	2.25	59	43.5	43.5	15	15	162	162	15.2	15.2	15	15	17	17	10	10	7.4	7.4	104	104	0.95	0.95	111	111	136	136	3.2	3.3	3.1
0	1	1	11	15	6	5	4	0	0	0	0	0	0	0	0	0	0	0	0	0	4.04167	74	28.1	29	10.8	11	218	243	14.4	19.3	17	18	12	13	170	172	6.2	6.4	91	94	6.09	6.5	85	103	122	123	4	4.3	2.2
0	1	1	4	15	6	5	4	2	0	0	0	0	0	0	0	0	0	0	0	0	1.91667	91	32.7	32.7	10.6	10.6	207	207	12.5	12.5	7	7	31	31	28	28	8.3	8.3	97	97	0.95	0.95	157	157	135	135	3.6	3.6	0.9
0	1	2	10	7	4	1	2	1	0	0	0	0	0	0	0	0	0	0	0	0	13.7083	87	27.3	27.3	8.9	8.9	279	279	23.4	23.4	8	11	21	24	69	70	8.1	8.6	104	108	2.19	2.29	139	368	136	140	5.1	5.3	2.5
0	0	1	11	11	6	1	4	2	0	1	0	0	0	0	0	0	0	0	0	0	13.75	70	26.6	32.9	8	9.7	543	892	18.7	21.8	6	6	26	26	28	28	7.3	7.3	109	109	0.7	0.7	94	94	141	141	4	4	0.6
0	0	3	5	3	1	1	1	3	0	0	0	0	0	0	0	0	0	0	0	0	21.25	40	28.9	29.1	8.4	8.7	187	188	5.5	6.3	5	9	24	25	2	4	7.2	7.5	118	121	0.17	0.17	128	153	151	151	2.9	4.2	2.7
0	1	1	6	14	5	5	4	0	0	0	0	0	0	0	0	0	0	0	0	0	1.33333	41	41.5	41.5	13.8	13.8	318	318	16.8	16.8	8	8	25	25	5	5	8.8	8.8	109	109	0.41	0.41	112	112	142	142	3.9	3.9	0.9
0	1	4	7	7	4	1	2	0	0	0	0	0	0	0	0	0	0	0	0	0	5.125	23	34.7	34.7	11.1	11.1	104	104	13.77	13.77	8	10	19	23	30	31	5.5	9.1	112	118	0.34	0.49	236	245	145	145	2.8	5.4	3.3
0	0	3	7	15	6	5	4	0	0	0	0	0	0	0	0	0	0	0	0	0	2.875	55	27.3	27.3	8.9	8.9	407	407	22.4	22.4	5	5	26	26	11	11	7.6	7.6	106	106	0.57	0.57	131	131	137	137	4.5	4.5	1.1
0	0	3	5	15	6	5	4	0	0	0	0	0	0	0	0	0	0	0	0	0	2.375	85	32.4	32.4	11.2	11.2	155	155	12.6	12.6	9	9	22	22	22	22	7.9	7.9	104	104	1.6	1.6	107	107	135	135	3.8	3.8	1.1
0	1	3	7	15	6	5	4	0	0	0	0	0	0	0	0	0	0	0	0	0	1.75	91	26.1	26.1	8.6	8.6	118	118	19.27	19.27	12	12	20	20	42	42	7.9	7.9	102	102	1.83	1.83	95	95	134	134	4.2	4.2	3.1
0	1	3	9	14	6	4	4	0	0	0	0	0	0	0	0	0	0	0	0	0	2.08333	85	19.7	28.1	6.4	9.2	207	285	8.4	16.3	12	12	23	23	78	78	7.1	7.1	98	98	4.1	4.1	77	77	133	133	3.4	3.4	0.7
0	1	3	12	7	4	2	1	1	0	0	0	0	0	0	0	0	0	0	0	0	2.91667	81	27.5	27.7	8.8	8.9	171	165	5.4	5.5	9	9	24	24	34	34	7.8	7.8	101	101	1.19	1.19	96	96	134	134	4.5	4.5	2.5
0	1	3	6	15	6	5	4	0	0	0	0	0	0	0	0	0	0	0	0	0	1.25	82	34.7	36.2	11.5	12.8	155	157	14.1	16.5	9	12	25	30	20	21	8.6	8.7	102	105	0.9	0.9	92	137	141	142	3.8	4.2	2.8
0	1	3	7	15	6	5	4	0	0	0	0	0	0	0	0	0	0	0	0	0	1.79167	77	38.4	38.4	12.8	12.8	143	143	16.4	16.4	9	9	19	19	17	17	6.5	6.5	106	106	1	1	109	109	134	134	3.9	3.9	1.9
0	1	4	13	15	6	5	4	1	0	0	0	0	0	0	0	0	0	0	0	0	2.29167	71	37.1	38	12.7	12.9	91	104	17.81	20.06	6	6	26	26	37	37	7.6	7.6	111	111	1.87	1.87	169	169	143	143	4.1	4.1	2.2
0	1	3	8	10	5	3	2	0	0	0	0	0	0	0	0	0	0	0	0	1	1.29167	91	27.5	27.5	8.9	8.9	282	282	10.8	10.8	16	16	16	16	143	143	9.7	9.7	125	125	3.67	3.67	203	203	157	157	4.7	4.7	2.4
0	1	3	9	8	4	2	2	0	0	0	0	0	0	0	0	0	0	0	0	0	1.91667	86	35.9	35.9	11.5	11.5	157	157	12	12	11	15	28	32	84	106	8.2	8.4	113	115	1.8	2.5	212	300	156	159	3.6	4.1	1.3
0	1	3	9	15	6	5	4	0	0	0	0	0	0	0	0	0	0	0	0	0	2.95833	75	38	38.3	13.2	13.3	125	133	10.7	28.5	10	16	14	20	13	16	7.7	7.9	108	109	1	1.1	119	123	138	139	3.3	4.2	5.7
0	1	3	11	9	5	1	3	2	0	0	0	0	0	0	0	0	0	0	0	0	4.25	78	25.4	26	8.1	8.8	201	229	9.7	10.48	7	8	17	24	14	34	6.8	6.8	108	117	0.8	1.18	85	94	139	142	3.2	3.5	2.6
1	0	1	9	15	6	5	4	0	0	0	0	0	0	0	0	0	0	0	0	0	1.125	74	33.9	33.9	11.7	11.7	133	133	11.5	11.5	13	13	15	15	49	49	7.1	7.1	102	102	2.71	2.71	189	189	130	130	3.9	3.9	4.9
0	0	3	6	12	5	4	3	0	0	0	0	0	0	0	0	0	0	0	0	1	1.375	85	22.7	27.4	7.3	8.7	185	185	22	22	11	11	19	19	44	44	8.7	8.7	112	112	1.58	1.58	119	119	142	142	3.8	3.8	1.6
1	0	1	13	3	1	1	1	1	0	0	0	0	0	0	0	0	0	0	0	0	1	79	30.8	38.3	9.7	12.4	139	176	2.8	16.2	16	18	15	16	56	70	7.4	8.8	110	117	1.9	2.4	317	352	141	150	3.7	5	2.6
0	0	1	9	14	6	4	4	4	0	0	0	0	0	0	0	0	0	0	0	0	20.3333	62	36.5	36.5	11.5	11.5	154	154	17.8	17.8	8	8	27	27	11	11	8.2	8.2	115	115	0.4	0.4	164	164	150	150	3.5	3.5	1.5
0	0	3	6	15	6	5	4	1	0	0	0	0	0	0	0	0	0	0	0	0	2.79167	54	39.9	39.9	12.7	12.7	286	286	17.8	17.8	11	13	24	26	8	10	7.1	7.2	100	106	0.26	0.27	102	106	139	141	2.7	3.8	1.1
1	0	3	8	8	2	5	1	2	0	0	0	0	0	0	0	0	0	0	0	0	2.41667	50	19.8	23.7	6.7	8.3	212	256	16.9	18.7	12	14	16	17	38	39	7.4	8	109	112	0.99	1.22	89	113	137	143	3	5.4	2.19
1	0	3	5	15	6	5	4	0	0	0	0	0	0	0	0	0	0	0	0	0	2.25	85	35	35	11.5	11.5	459	459	15.1	15.1	6	6	28	28	24	24	9.6	9.6	106	106	0.4	0.4	151	151	140	140	3.4	3.4	1.6
0	0	3	6	15	6	5	4	0	0	0	0	0	0	0	0	0	0	0	0	0	1.41667	87	21.5	24.5	7.2	8.4	264	296	12.4	13.1	9	9	21	21	27	27	7.2	7.2	104	104	1.2	1.2	98	98	134	134	5.5	5.5	1.5
1	0	3	13	6	4	1	1	2	0	0	0	0	0	0	0	0	0	0	0	0	6.25	85	35.6	35.6	10.7	10.7	108	108	3.51	3.51	12	12	17	17	74	74	8.1	8.1	125	125	3.75	3.75	90	90	154	154	4.4	4.4	1.7
0	0	3	14	3	1	1	1	4	0	0	0	0	0	0	0	0	0	0	0	0	12.5	74	29.3	29.3	9.8	9.8	125	125	15	15	12	14	16	18	64	81	7	8.4	114	116	3.17	3.98	78	310	144	146	3	3.7	1.4
0	0	4	12	14	6	4	4	1	0	0	0	0	0	0	0	0	0	0	0	0	5.41667	70	27	27	8.8	8.8	42	42	0.8	0.8	11	11	23	26	27	43	7	7.1	104	107	1.4	1.9	190	196	138	144	4.8	5.6	2.4
0	0	3	7	15	6	5	4	0	0	0	0	0	0	0	0	0	0	0	0	0	5.79167	63	26.8	26.8	8.9	8.9	179	179	10.9	10.9	8	8	23	23	27	27	7.6	7.6	96	96	1.3	1.3	192	192	127	127	3.8	3.8	0.8
1	0	3	12	3	1	1	1	0	0	0	0	0	0	0	0	0	0	0	0	0	2.29167	53	20.9	20.9	6.9	6.9	125	125	25.4	25.4	11	11	22	22	37	37	7.2	7.2	102	102	1.1	1.1	129	129	135	135	3.6	3.6	4.1
0	0	3	4	15	6	5	4	0	0	0	0	0	0	0	0	0	0	0	0	0	2.625	34	27.7	27.7	9.6	9.6	258	258	19	19	9	9	26	26	17	17	8	8	109	109	0.6	0.6	148	148	144	144	3.3	4.5	1.3
0	0	3	4	14	6	5	3	0	0	0	0	0	0	0	0	0	0	0	0	0	2.83333	34	28.6	28.6	9.9	9.9	258	258	7	7	10	10	23	23	2	2	7.2	7.2	108	108	0.3	0.3	113	113	141	141	3.3	3.3	1.9
0	0	3	18	15	6	5	4	0	0	0	0	0	0	0	0	0	0	0	0	0	5.58333	35	25.2	25.2	8.4	8.4	14	14	15.8	15.8	12	13	18	19	46	51	5.9	6	107	107	5.5	5.6	104	119	138	138	2.5	3.2	1.3
0	0	3	9	10	5	2	3	2	0	0	0	0	0	0	0	0	0	0	0	0	2.25	81	37.6	37.6	12.8	12.8	212	212	17.9	17.9	9	11	20	22	52	58	7.6	7.6	123	128	1.18	1.51	106	134	152	159	2.9	3.3	4.5
0	1	1	10	15	6	5	4	2	0	0	0	0	0	0	0	0	0	0	0	0	1.29167	84	31.3	32.3	11.1	11.3	137	214	11.25	25.01	9	11	20	21	19	22	7.9	8.3	103	109	1.3	1.43	113	119	133	140	4	4.3	1.8
1	0	1	8	7	4	1	2	2	0	0	0	0	0	0	0	0	0	0	0	0	3.83333	88	34.2	35.5	11.2	11.9	316	322	17.1	23.3	7	9	23	23	23	25	6.5	6.8	106	106	0.78	0.81	184	221	136	138	3.6	3.7	0.7
0	0	1	11	14	6	4	4	0	0	0	0	0	0	0	0	0	0	0	0	1	1.83333	80	26.7	26.7	8.3	8.3	73	73	248.69	248.69	5	5	20	20	39	39	7.5	7.5	104	104	1.61	1.61	131	131	129	129	5.6	6	2.4
1	0	1	13	8	1	3	4	2	0	0	0	0	0	0	0	0	0	0	0	0	1.20833	91	29.7	30	9.1	9.2	258	277	19.94	22.09	5	17	19	32	44	45	7.1	7.3	102	102	0.68	1.01	86	156	138	139	3.3	3.6	12.9
0	0	3	6	15	6	5	4	0	0	0	0	0	0	0	0	0	0	0	0	0	2.91667	82	26.3	30.3	8.2	9.5	188	225	7.3	8.7	7	7	27	27	19	19	8	8	98	98	1.2	1.2	84	84	132	132	3.6	3.6	1.2
1	1	2	9	12	6	3	3	1	0	0	0	0	0	0	0	0	0	0	0	0	3.79167	65	31.9	31.9	10.1	10.1	139	139	9	9	6	9	34	36	45	50	8.7	8.8	96	97	1.14	1.24	156	203	139	139	3.9	4.4	1
0	0	1	8	15	6	5	4	0	0	0	0	0	0	0	0	0	0	0	0	0	1.95833	70	29.8	29.8	10.2	10.2	169	169	10.4	10.4	8	8	20	20	30	30	7.4	7.4	109	109	1.18	1.18	195	195	137	137	4.1	4.1	1.5
0	0	3	9	15	6	5	4	0	0	0	0	0	0	0	0	0	0	0	0	1	1.79167	71	38.1	38.1	12.3	12.3	115	115	7.3	7.3	19	19	23	23	64	64	8	8	92	92	5.1	5.1	89	89	134	134	4.2	4.8	2.19
0	1	3	8	13	6	4	3	0	0	0	0	0	0	0	0	0	0	0	0	0	2.33333	91	28.2	28.2	9.3	9.3	95	95	24.1	24.1	10	10	20	20	18	18	7.4	7.4	105	105	1.17	1.17	96	96	135	135	3.8	3.8	1.8
0	0	1	10	15	6	5	4	0	0	0	0	0	0	0	0	0	0	0	0	0	2.125	60	12.4	12.4	3.7	3.7	25	25	19.1	19.1	9	9	18	18	76	76	7.8	7.8	109	109	3.65	3.65	114	114	136	136	4.6	4.6	0.3
1	0	3	14	7	4	1	2	0	0	0	0	0	0	0	0	0	0	0	0	0	2.70833	77	33	33	10.8	10.8	36	36	26.4	26.4	8	8	22	22	46	46	7.1	7.1	118	118	1.1	1.1	127	127	148	148	2.9	2.9	0.7
0	0	3	10	14	6	4	4	0	0	0	0	0	0	0	0	0	0	0	0	0	1.04167	84	33.6	33.6	11.2	11.2	84	84	24.6	24.6	10	10	21	21	26	26	7.2	7.2	114	114	1.6	1.6	105	105	145	145	4.1	4.1	2.2
0	0	1	9	13	6	4	3	1	0	1	0	0	0	0	0	0	0	0	0	0	1.625	91	38.7	38.7	13.1	13.1	319	319	13.8	13.8	10	10	20	20	50	50	8	8	100	100	1.25	1.25	181	181	130	130	4.2	4.2	1.2
0	0	1	5	15	6	5	4	0	0	0	0	0	0	0	0	0	0	0	0	0	1.66667	55	31.9	31.9	10.9	10.9	144	144	12.1	12.1	10	10	21	21	23	23	6.6	6.6	104	104	0.72	0.72	106	106	135	135	4.3	4.3	1.7
1	0	4	11	6	4	1	1	3	0	0	0	0	0	0	0	0	0	0	0	0	3.54167	70	31.8	31.8	10.1	10.1	255	255	16.85	16.85	14	14	16	16	28	28	7.2	7.2	103	103	2.53	2.53	179	179	133	133	3.1	3.1	0.3
0	0	1	11	15	6	5	4	1	0	0	0	0	0	0	0	0	0	0	0	0	4.16667	66	26.3	26.3	9.2	9.2	128	128	21.55	21.55	8	8	20	20	10	10	7.7	7.7	101	101	0.71	0.71	132	132	129	129	3.4	3.4	1.4
0	0	3	5	14	6	4	4	0	0	0	0	0	0	0	0	0	0	0	0	0	1.20833	77	27.6	27.6	9.2	9.2	271	271	23.9	23.9	4	4	28	28	17	17	8	8	111	111	0.7	0.7	70	70	143	143	4.2	4.2	1.3
0	1	3	11	15	6	5	4	0	0	0	0	0	0	1	0	0	0	0	0	0	2.5	61	27.8	39.2	9.7	13.6	139	156	4.59	6.07	11	12	15	15	29	34	8.6	9.1	118	120	1.78	1.79	121	152	144	147	3.2	3.3	0.7
0	0	3	10	14	6	4	4	0	0	0	0	0	0	0	0	0	0	0	0	0	2.83333	87	32.7	32.7	10.7	10.7	182	182	5.1	5.1	14	14	19	19	63	63	9.2	9.2	106	106	2.8	2.8	91	91	139	139	5.9	5.9	2.8
0	0	3	12	14	6	4	4	1	0	0	0	0	0	0	0	0	0	0	0	0	5.25	76	29.5	29.5	10.1	10.1	84	84	18.4	18.4	9	9	19	19	36	36	6.2	6.2	118	118	1.5	1.5	131	131	146	146	3.5	3.5	1.2
0	0	2	12	10	5	1	4	2	0	0	0	0	0	0	0	0	0	0	0	0	3.58333	83	24.5	30.1	8.4	10	100	140	5.9	6	11	16	12	20	46	50	6.9	7.8	105	112	2.4	2.59	128	170	136	140	4.2	4.6	1.9
1	0	3	12	7	4	1	2	1	0	0	0	0	0	0	0	0	0	0	0	0	6.125	82	31.4	32.9	10.3	10.6	365	387	24.4	34.3	23	24	14	16	179	189	6.8	7.1	118	122	8.28	9.02	255	294	158	159	3.8	4.4	1.5
0	0	3	14	15	6	5	4	2	0	0	0	0	0	0	0	0	0	0	0	0	5.66667	53	31.1	31.1	9.7	9.7	79	79	15.3	15.3	10	17	16	25	24	35	7.8	7.9	92	94	1.98	2.31	326	511	127	127	3.2	3.8	3.2
0	0	1	13	9	4	2	3	0	0	0	0	0	0	0	0	0	0	0	0	0	5.83333	89	28.8	28.8	9.6	9.6	22	22	30.8	30.8	9	9	19	19	39	39	7.4	7.4	115	115	1.86	1.86	220	220	143	143	4.3	4.3	1.6
0	0	3	8	13	6	5	2	0	0	0	0	0	0	0	0	0	0	0	0	0	1.04167	78	22.2	22.2	8	8	25	25	0.4	0.4	10	12	22	22	12	17	7.3	7.5	94	95	0.3	0.5	89	151	127	128	3	3.3	1.3
0	0	3	9	12	5	4	3	1	0	0	0	0	0	0	0	0	0	0	0	0	2.04167	91	40.5	40.5	12.5	12.5	358	358	18.4	18.4	21	21	17	17	44	44	6.8	6.8	110	110	1.9	1.9	104	104	148	148	5.2	5.2	5.8
0	0	3	9	15	6	5	4	0	0	0	0	0	0	0	0	0	0	0	0	0	1.83333	66	28.8	28.8	9.9	9.9	33	33	12.8	12.8	9	9	31	31	8	8	8.4	8.4	103	103	0.9	0.9	151	151	143	143	3.7	3.9	1.2
0	1	3	7	14	6	4	4	3	0	0	0	0	0	1	0	0	0	0	0	0	1.83333	81	33	33	11.3	11.3	360	360	48.32	48.32	10	11	17	19	15	17	7.3	7.7	108	113	0.71	0.91	118	137	137	140	2.8	3.4	1.9
1	0	3	6	14	6	4	4	0	0	0	0	0	0	0	0	0	0	0	0	0	3.375	82	36.9	36.9	12.2	12.2	268	268	12.6	12.6	6	6	23	23	12	12	7.5	7.6	106	106	0.52	0.52	102	102	135	135	3.8	3.8	1
1	0	4	8	5	1	1	3	1	0	0	0	0	0	0	0	0	0	0	0	0	5.33333	91	22.8	27.8	7.8	9.7	179	222	13.28	18.5	6	6	23	25	26	28	7.9	8	91	102	0.58	0.64	141	149	122	131	4	4.8	1.1
0	0	4	14	5	1	1	3	0	0	0	0	0	0	0	0	0	0	0	0	0	13.6667	55	37.9	40.7	11.3	12.9	213	405	10.3	11.7	16	21	14	17	23	24	8.1	8.8	104	109	1.53	1.74	129	136	137	144	3.6	4.8	8.3
0	0	3	10	11	5	2	4	0	0	0	0	0	0	0	0	0	0	0	0	0	3	89	42.6	42.6	13.6	13.6	199	199	13.6	13.6	14	14	26	26	52	52	8.9	8.9	116	116	0.9	0.9	210	210	156	156	3.1	3.1	1.9
1	1	3	14	3	1	1	1	2	0	0	0	0	0	0	0	0	0	0	0	0	5.70833	87	38.9	38.9	12.8	12.8	430	430	35	35	16	17	21	22	119	125	8.9	8.9	117	118	4.3	4.6	190	317	155	156	3.9	4.3	6
1	0	1	10	14	6	4	4	2	0	0	0	0	0	0	0	0	0	0	0	0	2.95833	67	31.4	33.2	10.6	11.3	234	252	19.2	22.8	15	15	19	19	31	31	8.1	8.1	103	103	1.22	1.22	100	100	137	137	3.3	3.3	5.2
0	0	4	13	15	6	5	4	2	0	0	0	0	0	0	0	0	0	0	0	0	2.83333	82	27.1	27.1	8.9	8.9	108	108	3.72	3.72	12	12	18	18	19	19	8.2	8.2	108	108	0.71	0.71	54	54	138	138	3.9	3.9	1.4
0	0	1	9	11	5	3	3	2	0	0	0	0	0	0	0	0	0	0	0	0	3.20833	80	33.3	33.3	10.7	10.7	200	200	15.05	15.05	4	19	18	25	20	37	7	8	106	113	0.92	1.6	158	351	138	145	3.7	4.5	1.7
1	0	2	12	15	6	5	4	0	0	0	0	0	0	0	0	0	0	0	0	0	1.625	54	20.6	20.6	6.8	6.8	63	63	14.5	14.5	10	10	25	25	37	37	7.8	7.8	103	103	1.65	1.65	111	111	138	138	3.9	3.9	2.6
0	0	3	7	15	6	5	4	0	0	0	0	0	0	0	0	0	0	0	0	0	1.45833	91	37.3	37.3	11.9	11.9	201	201	13	13	10	10	25	25	20	20	8.1	8.1	95	95	1.3	1.3	101	101	130	130	4.2	4.2	4
0	1	3	8	7	5	1	1	3	0	0	0	0	0	0	0	0	0	0	0	0	6.54167	73	27.8	31.3	8.7	9.9	194	209	15.2	23.7	7	10	16	18	47	62	7.5	7.6	121	122	0.98	1.39	124	127	146	148	3.5	3.8	1
0	1	3	9	10	4	2	4	0	0	0	0	0	0	0	0	0	0	0	0	0	1.875	91	27.9	27.9	8.9	8.9	309	309	24	24	8	8	23	23	74	74	7.3	7.3	117	117	1.47	1.47	236	236	148	148	4.8	4.8	2.4
1	1	2	16	3	1	1	1	1	0	0	0	0	0	0	0	0	0	0	0	0	1.25	74	34.8	44.6	11.6	14.4	134	256	30.5	49.1	14	14	20	20	62	62	7.6	7.6	98	98	3.48	3.48	134	134	132	132	5.2	5.2	4.6
0	0	1	9	15	6	5	4	3	0	0	0	0	0	0	0	0	0	0	0	0	7.54167	30	28.2	28.2	8.8	8.8	168	168	7.6	7.6	9	9	25	25	7	7	7.3	7.3	110	110	0.16	0.16	89	89	144	144	2.9	2.9	1.5
0	1	3	12	15	6	5	4	1	0	0	0	0	0	0	0	0	0	0	0	0	3	82	27.3	27.3	8.7	8.7	60	60	1.3	1.3	17	17	15	15	15	15	8.1	8.1	108	108	1.24	1.24	54	54	140	140	3.7	3.7	7.8
0	1	3	11	11	5	2	4	2	0	0	0	0	0	0	0	0	0	0	0	0	1.83333	84	25.7	30.8	8	9.4	69	90	13.7	17.97	6	10	24	25	39	65	7.2	7.2	117	120	1.2	1.77	227	235	147	155	3.7	3.8	4.3
0	1	1	12	15	6	5	4	3	0	0	0	0	0	0	0	0	0	0	0	0	2.58333	74	38.5	38.5	12.8	12.8	117	117	24.07	24.07	11	11	23	23	42	42	8.1	8.1	99	99	2.6	2.6	177	177	133	133	4.2	4.2	2.5
0	1	3	12	6	4	1	1	2	0	0	0	0	0	0	0	0	0	0	0	0	3.33333	86	37.8	37.8	11.5	11.5	231	231	19.3	19.3	9	9	25	25	88	88	7.8	7.8	117	117	1.83	1.83	162	162	151	151	3.4	3.4	0.4
0	0	1	5	14	6	4	4	0	0	0	0	0	0	0	0	0	0	0	0	0	1.875	58	34.7	34.7	11.1	11.1	244	244	14	14	6	6	27	27	15	15	8.5	8.5	104	104	0.9	0.9	84	84	137	137	3.9	3.9	0.7
1	1	3	16	6	4	1	1	1	0	0	0	0	0	0	0	0	0	0	0	1	1.41667	85	30.7	32.4	10.1	10.7	62	98	15.7	18.7	11	18	11	17	35	47	5.8	6.8	104	107	2.2	3.6	81	151	135	135	5.5	7.1	9.4
1	1	1	15	14	6	4	4	3	0	0	0	0	0	0	0	0	0	0	0	0	2.04167	75	24	24	8	8	101	101	1.19	1.19	15	15	13	13	52	52	7.7	7.7	106	106	3.49	3.49	193	193	134	134	4.1	4.1	5.2
0	1	1	5	10	5	2	3	0	0	0	0	0	0	0	0	0	0	0	0	0	3	82	45.9	45.9	14.4	14.4	404	404	59.6	59.6	5	5	27	27	47	47	8.4	8.4	126	126	1.54	1.54	142	142	158	158	4.3	4.3	1.5
0	1	1	8	15	6	5	4	2	0	0	0	0	0	0	0	0	0	0	0	0	5.70833	55	19.5	24.9	6.6	8.3	500	500	19.77	19.77	8	8	24	24	31	31	8	8	94	94	1.86	1.86	116	116	126	126	3.9	3.9	1
0	1	2	5	9	5	2	2	0	0	0	0	0	0	0	0	0	0	0	0	0	1.95833	48	21.5	23.3	6.8	7.4	101	107	5.1	6.1	7	7	25	25	13	13	7.4	7.4	113	113	0.8	0.8	91	91	145	145	4.1	4.1	3.9
0	0	3	7	15	6	5	4	0	0	0	0	0	0	0	0	0	0	0	0	1	1.79167	46	31.2	34.7	10.5	11.7	184	203	16.8	19.9	7	9	20	21	24	25	7.9	8	98	100	1.5	1.6	133	134	127	128	4.2	4.2	1.3
0	1	1	8	15	6	5	4	0	0	0	0	0	0	0	0	0	0	0	0	0	1.83333	58	42.5	42.5	14.8	14.8	71	71	11.8	11.8	9	9	18	18	56	56	6.4	6.4	109	109	2.23	2.23	89	89	136	136	4.5	4.5	1.6
0	1	3	7	15	6	5	4	0	0	0	0	0	0	0	0	0	0	0	0	0	2.08333	52	31.4	31.7	10.6	10.6	236	247	26.4	30	6	9	25	28	14	17	7.1	8.2	97	106	1	1.3	91	151	134	138	3.9	5	0.9
0	0	3	9	10	6	1	3	2	0	0	0	0	0	0	0	0	0	0	0	1	2.83333	68	25.7	25.7	8.2	8.2	240	240	11.7	11.7	13	13	24	24	55	55	8	8	103	103	5.74	5.74	59	59	140	140	3.8	3.9	6
0	1	3	12	9	5	1	3	1	0	0	0	0	0	0	0	0	0	0	0	0	1.29167	73	31.7	31.7	10.1	10.1	334	334	13.7	13.7	4	4	27	27	18	18	8	8	113	113	0.9	0.9	88	88	144	144	4.1	4.1	1.8
0	0	4	8	9	4	1	4	0	0	0	0	0	0	0	0	0	0	0	0	0	4.70833	62	23.5	24.7	8.2	8.3	222	240	9.3	10.3	13	13	13	13	17	17	6.6	6.6	119	119	0.9	0.9	130	130	145	145	3.1	3.1	1.9
1	1	3	6	14	6	5	3	0	0	0	0	0	0	0	0	0	0	0	0	0	3.66667	67	32	32.5	10.6	10.7	100	107	8	8.2	5	5	30	30	17	17	8.1	8.1	99	99	0.65	0.64	97	97	134	134	3.1	3.1	0.58
0	0	3	9	15	6	5	4	0	0	0	0	0	0	0	0	0	0	0	0	0	1.66667	75	31.4	31.4	9.4	9.4	282	282	10.9	10.9	6	6	26	26	19	19	7.9	7.9	106	106	0.9	0.9	256	256	138	138	4.8	4.8	1.6
0	1	3	8	15	6	5	4	0	0	0	0	0	0	0	0	0	0	0	0	0	2.79167	79	32.7	31.2	10.7	10.2	111	101	8.9	8.7	17	14	23	20	62	58	9.8	9.3	107	109	1.8	1.19	209	198	142	142	5.5	5.1	2.6
1	1	3	12	7	3	3	1	2	0	0	0	0	0	0	0	0	0	0	0	1	7.70833	52	45.9	48.1	15.2	16.1	180	217	11.73	17.29	14	15	19	22	67	73	7.6	8	96	97	9.72	10.3	110	144	130	133	4.7	5.9	2.3
0	1	3	6	15	6	5	4	0	0	0	0	0	0	0	0	0	0	0	0	0	1.625	79	44.4	44.4	14.4	14.4	159	159	7.2	7.2	7	7	24	24	18	18	8.3	8.3	110	110	1.3	1.3	99	99	141	141	4.8	4.8	0.3
0	1	1	11	15	6	5	4	0	0	0	0	0	0	0	0	0	0	0	0	1	2.25	73	28.3	28.3	9	9	59	59	2.3	2.3	13	13	25	25	28	28	8	8	103	103	2.1	2.1	74	74	141	141	3.9	3.9	1.7
0	0	3	8	9	4	1	4	0	0	0	0	0	0	0	0	0	0	0	0	0	3.58333	52	29.1	40.6	9.8	14	169	225	11.8	15.3	8	8	21	23	17	23	6.1	8.4	108	117	0.81	1.35	108	153	139	146	3.4	4.4	1.1
0	1	4	12	15	6	5	4	3	0	0	0	0	0	0	0	0	0	0	0	1	4.20833	80	30.4	30.4	9.7	9.7	274	274	10.5	10.5	10	10	28	28	54	54	8.7	8.7	99	99	6.86	6.86	93	93	137	137	4.6	4.6	1.1
0	0	1	9	13	5	4	4	1	0	0	0	0	0	0	0	0	0	0	0	0	2.625	83	27.7	29.5	9	9.6	498	504	31.8	29.99	16	17.1	20	20	15	14	7.5	8.3	100	102	1.3	1.22	98	122	132	135	4.3	4.6	3.5
0	1	4	7	15	6	5	4	0	0	0	0	0	0	0	0	0	0	0	0	0	1.08333	67	26.2	26.2	8.7	8.7	206	206	59.5	59.5	9	9	23	23	23	23	7.9	7.9	111	111	1.4	1.4	177	177	143	143	4.5	4.5	1.9
1	1	1	9	8	5	2	1	0	0	1	0	0	0	0	0	0	0	0	0	0	5.66667	63	38.1	36.7	13.2	12.9	197	197	48.5	50.3	10.3	11	23	24	33	35	8	8.2	109	115	1.2	1.25	111	172	142	145	4.7	4.8	1.3
0	0	3	9	14	6	4	4	0	0	0	0	0	0	0	0	0	0	0	0	0	1.54167	78	30.7	30.7	9.4	9.4	138	138	7	7	7	7	23	24	29	37	8.1	8.5	113	114	1.2	1.5	77	98	144	144	4.2	4.9	2.1
0	0	3	6	15	6	5	4	0	0	0	0	0	0	0	0	0	0	0	0	0	1.125	71	32.9	32.9	10.8	10.8	109	109	11.2	11.2	7	7	26	26	12	12	7.5	7.5	107	107	0.84	0.84	111	111	140	140	3.4	3.4	0.5
0	0	3	9	15	6	5	4	0	0	0	0	0	0	0	0	0	0	0	0	0	1.41667	85	22.7	22.7	7.3	7.3	410	410	25.42	25.42	7	7	25	25	51	51	8.5	8.5	102	102	1.72	1.72	158	158	134	134	4.6	4.6	1.5
0	0	3	13	11	6	1	4	3	0	0	0	0	0	0	0	0	0	0	0	0	14.9167	58	20.7	27.5	7.6	10	113	134	19.78	20.77	7	7	24	24	20	20	7	7	110	110	1.82	1.82	85	85	141	141	3.9	3.9	0.8
0	1	3	10	14	6	4	4	0	0	0	0	0	0	0	0	0	0	0	0	0	6.29167	53	37.1	37.1	13	13	188	188	14.4	14.4	10	10	26	26	48	48	8.3	8.3	95	95	2.42	2.42	141	141	131	131	3.9	3.9	0.9
0	0	1	8	7	5	1	1	0	0	0	0	0	0	0	0	0	0	0	0	1	9.91667	48	25.2	27.1	8.5	9.3	341	375	11.1	12.4	14	14	22	24	43	53	8.8	9	93	94	2.47	3	82	95	130	131	3.9	4.3	0.9
0	1	3	8	9	1	4	4	2	0	0	0	0	0	0	0	0	0	0	0	0	11.5	39	35.1	35.1	11.6	11.6	177	177	12.1	12.1	6	6	24	24	15	15	8.8	8.8	111	111	0.3	0.3	75	75	141	141	4.3	4.3	1.9
0	1	3	9	10	4	4	2	0	0	0	0	0	0	0	0	0	0	0	0	0	1.91667	40	34.8	34.8	11.5	11.5	370	370	14.1	14.1	6	6	32	32	20	20	9.2	9.2	99	99	0.5	0.5	104	118	137	137	3	4.2	0.9
0	1	3	12	9	1	4	4	1	0	0	0	0	0	0	0	0	0	0	0	0	2.125	40	28.4	28.4	9.2	9.2	201	201	6.8	6.8	4	4	28	28	11	11	8.3	8.3	111	111	0.4	0.4	90	90	143	143	3.5	3.5	1
0	0	3	12	15	6	5	4	0	0	0	0	0	0	0	0	0	0	0	0	0	2.95833	62	30.5	30.5	10.7	10.7	299	299	26	26	14	14	15	15	66	66	6.9	7.1	98	98	2.59	2.59	191	191	127	127	4.5	4.5	2.2
0	1	3	10	12	4	5	3	3	0	0	0	0	0	0	0	0	0	0	0	0	1.75	81	24.3	30.3	7.9	10.2	217	231	8.9	12.6	16	17	14	19	102	115	7	9.6	113	116	6.6	7.4	37	157	147	149	3.9	4.4	3
0	0	1	6	14	6	4	4	0	0	0	0	0	0	0	0	0	0	0	0	0	2.25	63	31.3	31.3	10.6	10.6	158	158	9.6	9.6	9	9	22	22	9	9	7.8	7.8	105	105	1.09	1.09	172	172	136	136	3.6	3.6	0.9
0	1	3	12	9	4	2	3	1	0	0	0	0	0	0	0	0	0	0	0	0	1.5	81	27	27	8.7	8.7	138	138	39.9	39.9	9	9	19	19	33	33	6.5	6.5	113	113	1.18	1.18	350	350	141	141	4.1	4.1	2.4
0	1	3	15	10	5	1	4	3	0	0	0	0	0	0	0	0	0	0	0	0	1.75	59	23.2	25.3	8.5	9.4	129	131	17.1	18.2	10	15	12	20	85	91	6.7	7.1	107	109	8.36	8.81	121	198	136	137	5	5.3	3
0	0	3	13	3	1	1	1	3	0	0	0	0	0	0	0	0	0	0	0	0	1.08333	82	28.5	31.8	9.4	10.4	122	137	27.1	34.7	10	10	19	22	22	27	6.6	7.2	111	114	1.3	1.7	138	193	141	143	3.8	3.9	2.3
0	0	3	11	3	1	1	1	3	0	0	0	0	0	0	0	0	0	0	0	0	8.79167	82	26.6	27.3	8.7	8.9	119	124	8.8	15	10	10	18	19	33	36	7	7.4	112	113	1.69	1.83	135	144	141	141	3.5	3.6	1.4
0	1	1	12	15	6	5	4	3	0	0	0	0	0	0	0	0	0	0	0	0	8.33333	91	28.7	29.4	9.5	9.7	93	94	39.83	47.72	14	14	17	17	109	109	8.5	8.5	108	111	3.12	3.19	99	108	139	142	3.5	3.7	2.6
0	1	1	11	15	6	5	4	0	0	0	0	0	0	0	0	0	0	0	0	0	3.16667	91	26	26.2	8.4	8.6	81	91	16.8	24.3	10	10	17	17	57	64	8.1	8.1	105	106	1.84	1.9	90	103	132	133	4.1	4.2	1.3
0	1	2	10	11	6	2	3	1	0	0	0	0	0	0	0	0	0	0	0	0	10.2917	59	34	34.4	10.9	11.1	197	211	20.2	28.8	7	10	27	27	35	39	7.1	8.2	99	101	2.15	2.86	108	208	135	136	3.5	3.9	1.1
0	1	1	12	12	5	4	3	0	0	0	0	0	0	0	0	0	0	0	0	0	10.625	72	22.5	23.7	7.4	8	348	361	18.6	21.5	11	11	19	19	51	51	7.4	7.4	96	96	6.1	6.1	154	154	126	126	4.2	4.2	1.2
0	1	4	8	15	6	5	4	0	0	0	0	0	0	0	0	0	0	0	0	0	1.79167	75	27.2	27.2	8.7	8.7	113	113	25.3	25.3	11	17	21	25	60	67	7.8	8	96	102	2.05	2.11	223	435	134	138	3.4	4.7	6.7
0	1	3	11	11	6	1	4	2	0	0	0	0	0	0	0	0	0	0	0	1	2.45833	76	27.2	27.2	9	9	138	138	8.08	8.08	15	15	19	19	99	99	8.8	8.8	110	110	7.88	7.88	147	147	144	144	4.4	4.4	2.6
0	1	2	6	15	6	5	4	0	0	0	0	0	0	0	0	0	0	0	0	1	1.16667	69	40.5	40.5	14.1	14.1	104	104	4.2	4.2	10	10	26	26	14	14	9.3	9.3	103	103	1.3	1.3	102	102	139	139	4.1	4.1	1
1	0	3	10	14	6	4	4	0	0	0	0	0	0	0	0	0	0	0	0	0	2.04167	67	25.4	25.4	8.2	8.2	32	32	8.7	8.7	16	16	15	15	23	23	8.3	8.3	101	101	0.43	0.43	74	74	132	132	5.5	5.5	7
0	1	3	6	15	6	5	4	0	0	0	0	0	0	0	0	0	0	0	0	0	4.70833	33	30.6	30.6	10.1	10.1	331	331	15.8	15.8	6	6	27	27	12	12	7.7	7.7	107	107	0.76	0.76	119	119	140	140	4.1	4.1	2.1
1	0	3	11	8	5	2	1	0	0	0	0	0	0	0	0	0	0	0	0	0	3.08333	82	31.4	31.4	10.6	10.6	41	41	7.3	7.3	9	9	19	19	44	44	7.8	7.8	125	125	1.6	1.6	141	141	153	153	4.5	4.5	2.3
0	0	1	11	6	4	1	1	6	0	0	0	0	0	0	0	0	0	0	0	0	9.04167	39	31.1	31.3	10.7	11	107	108	11.8	12.7	13	17	15	19	14	16	5.9	6.1	105	106	1.87	1.97	151	217	137	138	3.6	4.1	5.8
0	0	3	5	14	6	4	4	3	0	0	0	0	0	0	0	0	0	0	0	0	7.75	82	38	38	12.3	12.3	238	238	13.7	13.7	7	7	25	25	22	22	7.9	7.9	107	107	1	1	107	107	139	139	3.7	4	0.8
1	1	2	18	3	1	1	1	3	0	0	0	0	0	0	0	0	0	0	0	0	3.95833	50	43.7	45.7	15.7	15.8	84	115	14.4	28.27	16	17	16	18	75	76	8.4	8.7	97	97	5.6	5.7	111	152	130	131	3.7	4	2.2
0	0	3	9	12	6	4	2	0	0	0	0	0	0	0	0	0	0	0	0	0	1.5	70	32.9	32.9	11.4	11.4	100	100	12	12	6	6	28	28	28	28	7.9	7.9	105	105	2	2	123	123	139	139	4.6	4.6	0.7
0	0	4	7	15	6	5	4	2	0	0	0	0	0	0	0	0	0	0	0	1	1.54167	66	27.8	30.2	9.5	10.3	114	146	33	66.1	6	6	25	26	5	6	7	7.3	115	115	0.38	0.4	83	88	146	147	3.1	4.2	2.6
0	1	1	7	11	6	1	4	0	0	0	0	0	0	0	0	0	0	0	0	0	3.25	32	47.6	47.6	16	16	291	291	33.5	33.5	8	8	24	24	17	17	9.2	9.2	107	107	0.79	0.79	145	145	139	139	4.7	4.7	3.3
0	1	3	6	3	1	1	1	0	0	0	0	0	0	0	0	0	0	0	0	0	2.20833	72	30.4	30.4	9.6	9.6	227	227	14.3	14.3	11	11	23	23	21	21	7.8	7.8	103	103	1	1	117	117	137	137	3.9	3.9	1.4
1	0	1	8	3	1	1	1	3	3	0	0	0	0	0	0	0	0	0	0	0	1.20833	65	19.2	29.8	6	9.8	210	210	10.1	10.1	6	6	34	34	19	19	8	8	104	104	0.31	0.31	251	251	144	144	3.5	3.5	1
0	0	1	12	8	5	1	2	3	0	0	0	0	0	0	0	0	0	0	0	0	1.875	78	37.4	37.4	12.3	12.3	111	111	8.2	8.2	9	9	25	25	17	17	7.9	7.9	107	107	1	1	105	105	141	141	3.6	3.6	1.2
0	0	1	7	9	5	1	3	0	0	0	0	0	2	0	0	0	0	0	0	0	1.79167	78	25.4	26.9	8.1	8.2	131	141	8.6	9.8	7	9	27	28	22	24	7.8	7.9	109	113	0.78	0.85	131	199	145	148	3.7	4	1.4
1	0	1	5	7	5	1	1	0	3	0	0	0	0	0	0	0	0	0	0	0	7.45833	68	29	30.7	10	10.6	310	310	82.5	82.5	10	10	23	23	34	34	7.3	7.3	102	102	1.75	1.75	153	153	135	135	3.6	3.6	2.5
0	0	3	9	7	5	1	1	0	0	3	0	0	0	0	0	0	0	0	0	0	4.5	54	25.5	25.5	8.5	8.5	286	286	10.5	10.5	6	6	28	28	39	39	8.1	8.1	106	106	1.15	1.15	90	90	140	140	3.5	3.9	0.7
0	1	4	3	15	6	5	4	0	3	0	0	0	0	0	0	0	0	0	0	0	1.125	79	33.2	34.6	11.5	11.9	123	109	21.8	21.67	9	9	21	21	16	16	6.6	6.6	115	115	0.8	0.8	97	97	145	145	2.8	2.8	3.8
0	1	1	9	15	6	5	4	0	3	0	0	0	0	0	0	0	0	0	0	0	1.625	74	40	40	14.2	14.2	115	115	14.2	14.2	17	17	16	16	68	68	6.9	6.9	97	97	4.36	4.36	333	333	130	130	3.9	3.9	1.6
0	1	1	5	14	6	5	3	0	0	1	0	0	0	0	0	0	0	0	0	1	1.83333	42	21.8	21.8	7.5	7.5	323	323	13.2	13.2	21	21	9	9	145	145	6.8	6.8	105	105	13.42	13.42	101	101	135	135	4	4.3	0.6
0	1	1	11	6	2	3	1	0	4	0	0	0	0	0	0	0	0	0	0	0	11	78	33.9	33.9	11.5	11.6	111	128	7.7	11	6	7	22	23	22	22	7.9	7.9	108	108	1.01	1.21	183	192	137	137	3.6	4.4	1.3
0	1	1	7	10	5	2	3	0	0	0	1	0	0	0	0	0	0	0	0	0	1.25	63	31.8	31.8	10.3	10.3	76	76	6	6	11	11	19	22	54	62	6.9	7.8	107	108	1.67	1.82	109	140	137	141	3.6	4.8	3.4
0	0	1	4	13	6	4	3	0	0	0	0	0	4	0	0	0	0	0	0	0	1.04167	89	23.6	25.6	8.2	8.7	178	186	9	10.7	8	8	25	25	20	20	8.4	8.4	105	105	0.5	0.5	84	84	138	138	3.3	3.3	1
0	1	1	4	15	6	5	4	2	0	0	0	0	4	0	0	0	0	0	0	0	1.04167	64	35.6	35.6	12.3	12.3	174	174	10.8	10.8	7	7	23	23	12	12	7.6	7.6	104	104	0.84	0.84	155	155	134	134	3.9	3.9	0.5
0	1	1	5	15	6	5	4	5	0	2	0	0	0	0	0	0	0	0	0	0	1.58333	56	23.8	24.5	6.8	7.8	294	294	32.8	32.8	9	12	15	16	53	89	7.5	7.7	112	113	1.19	1.22	263	342	137	140	3.7	3.9	0.6
0	1	1	9	14	6	4	4	5	0	0	0	0	1	0	0	0	0	0	0	0	2.70833	81	18.4	18.4	6.1	6.1	43	43	0.4	0.4	7	7	25	25	35	35	7.6	7.6	105	105	1.56	1.56	104	104	137	137	4	4	0.6
0	1	1	10	7	3	1	3	2	3	0	0	0	0	0	0	0	0	0	0	1	20.75	51	57.3	57.3	17.5	17.5	220	220	15.9	15.9	7	13	14	28	40	47	7.4	7.6	116	119	2.3	2.43	96	124	143	153	2.9	5	1.8
0	1	1	5	9	1	4	4	0	4	0	0	0	0	0	0	0	0	0	0	0	2.875	72	22.7	22.7	7.5	7.5	245	245	21.4	21.4	9	12	19	22	34	40	7.9	8.1	107	113	1.91	2.19	306	588	138	144	3.5	4.9	2.6
0	1	1	7	14	6	4	4	0	0	0	0	0	0	0	0	0	0	0	0	0	5.66667	62	45.7	45.7	16	16	91	91	18.1	18.1	8	8	27	27	38	38	8.3	8.3	96	96	1.16	1.16	294	294	131	131	4.6	4.6	2.2
1	1	1	8	6	1	4	1	0	0	0	0	0	2	0	0	0	0	0	0	0	11.875	62	35.3	35.3	11.7	11.7	57	57	9.5	9.5	11	11	20	20	43	43	7.9	7.9	108	108	1.3	1.3	170	170	139	139	3.9	4	3
1	1	1	8	7	4	2	1	2	5	0	0	0	0	0	0	0	0	0	0	0	6.41667	91	30.3	31.6	9.9	10.6	230	230	10.5	10.5	9	10	22	22	47	49	8.3	8.4	106	108	2.62	2.63	84	112	137	140	3.9	4.4	1.4
0	1	1	5	9	5	1	3	0	0	0	0	0	4	0	0	0	0	0	0	0	6.95833	35	26.2	26.2	7.7	7.7	189	189	7.6	7.6	8	8	28	28	38	38	8.8	8.8	99	99	1.78	1.78	87	87	135	135	3.6	3.6	1.2
0	1	1	12	8	5	1	2	1	0	0	0	0	2	0	0	0	0	0	0	1	15.9583	34	31.2	31.2	9.2	9.2	121	121	4.9	4.9	10	10	25	25	48	48	8.7	8.7	105	105	3.67	3.67	105	105	140	140	3.8	3.8	0.9
0	1	1	13	8	4	1	3	3	0	0	0	0	0	0	0	0	0	0	0	1	2.66667	34	25	29.8	7.6	8.6	132	137	5.4	5.4	5	9	27	31	47	49	8	8.2	103	104	4.3	4.56	79	89	139	140	4.4	4.4	0.6
0	1	1	10	15	6	5	4	1	2	0	0	0	0	0	0	0	0	0	0	0	1.125	72	25.6	30.7	8.2	10.4	65	106	7.6	9	7	15	16	22	38	42	7.3	8.1	111	116	1.62	1.69	112	114	142	145	3.8	4	1.6
0	0	1	3	15	6	5	4	0	0	0	0	0	0	1	0	0	0	0	0	0	1.41667	66	34.5	34.5	12	12	111	111	7.8	7.8	8	8	26	26	7	7	8	8	102	102	0.71	0.71	84	84	136	136	2.7	3.5	1.1
0	1	1	13	10	5	2	3	4	0	0	0	0	0	3	0	0	0	0	0	0	5.58333	69	37.1	42.1	12.5	14.2	81	83	9.3	10.8	9	10	25	25	40	50	7.5	7.6	101	103	1.4	1.62	106	132	135	138	3.9	4.4	3.2
0	1	1	4	15	6	5	4	0	0	0	0	0	3	0	0	0	0	0	0	0	2.125	53	36.9	36.9	11.9	11.9	173	173	15.5	15.5	7	7	27	27	22	22	8.1	8.1	112	112	1.24	1.24	201	201	146	146	5.6	5.6	1.1
0	0	1	6	15	6	5	4	2	0	0	0	0	2	0	0	0	0	0	0	0	2.125	59	24	24	7.9	7.9	161	161	12.5	12.5	6	6	22	22	26	26	8	8	113	113	1.15	1.15	175	175	141	141	4.2	4.2	0.7
0	1	1	9	7	4	1	2	3	0	0	0	0	4	0	0	0	0	0	0	0	7.79167	61	33.6	34.2	11	11.5	137	144	16.1	21.2	9	15	20	26	54	60	8.3	8.4	88	98	1.55	1.7	203	476	123	133	3.5	4.7	1.4
0	1	1	8	8	5	1	2	0	0	0	0	0	3	0	0	0	0	0	0	0	2.29167	50	28.6	29.4	9.1	9.4	111	181	6	9.2	13	16	14	16	18	19	8.4	8.6	112	114	0.52	0.54	125	152	142	143	4	4.8	1.5
1	1	1	12	3	1	1	1	4	0	0	0	0	3	0	0	0	0	0	0	0	1.20833	57	23.1	23.1	7.3	7.3	85	85	47	47	6	6	24	24	42	42	9.2	9.2	107	107	1.63	1.63	127	127	137	137	4.3	4.3	2.6
0	1	1	7	15	6	5	4	0	0	0	0	0	0	4	0	0	0	0	0	0	1.5	69	23.1	25.4	8.2	8.9	27	49	6.1	7	8	8	22	22	12	14	8.1	8.7	107	109	0.67	0.78	119	133	137	139	3.7	4.2	1.9
0	1	1	5	14	6	4	4	0	4	0	0	0	0	0	0	0	0	0	0	0	1.16667	67	32	32	10	10	260	260	18.1	18.1	6	6	30	30	27	27	8.3	8.3	108	108	1	1	128	128	144	144	3.8	3.8	3.2
0	1	2	7	8	5	1	2	0	0	0	0	0	0	1	0	0	0	0	0	0	10.8333	74	30.1	31.4	9.9	10.2	284	297	21.3	22	10	11	22	24	30	30	8.7	9	103	108	1.67	1.75	174	317	137	141	3.7	5.2	1.1
0	1	1	8	3	1	1	1	0	0	0	0	0	3	0	0	0	0	0	0	0	4.95833	91	31.9	31.9	10.7	10.7	121	121	3.9	3.9	7	7	22	22	14	14	6.9	6.9	113	113	0.96	0.96	88	88	142	142	3.4	4.2	1.2
0	1	1	5	15	6	5	4	1	0	0	0	0	0	1	0	0	0	0	0	0	2.45833	80	30.6	30.6	8.8	8.8	150	150	4.8	4.8	6	6	24	24	12	12	7.6	7.6	114	114	0.98	0.98	94	94	144	144	2.9	3.9	1.2
0	1	2	8	15	6	5	4	0	0	0	0	0	0	1	0	0	0	0	0	0	1.33333	61	24.2	28.3	7.8	9.2	1	5	15	15.8	5	8	26	27	73	74	7	7.3	108	110	1.87	2.23	156	178	140	144	4.1	4.3	1.6
0	0	1	8	8	5	1	2	0	6	0	0	0	0	0	0	0	0	0	0	0	3.5	64	30.1	30.1	9.8	9.8	70	70	8.2	8.2	8	8	20	20	18	18	8.1	8.1	110	110	0.91	0.91	141	141	138	138	3.9	3.9	3.5
0	0	1	11	6	4	1	1	0	2	0	0	0	0	0	0	0	0	0	0	0	3.20833	65	22.3	23.3	7.3	7.6	98	101	5.6	5.7	9	10	18	18	46	51	7.4	7.4	109	110	1.86	1.93	146	187	136	138	4.4	4.5	1
0	0	1	5	15	6	5	4	1	1	0	0	0	0	0	0	0	0	0	0	0	2.375	72	31.1	31.1	10.2	10.2	104	104	8.9	8.9	7	7	20	20	20	20	7.6	7.6	115	115	1	1	115	115	142	142	3.5	4	1.5
0	0	1	13	8	5	1	2	0	1	0	0	0	0	0	0	0	0	0	0	0	1.875	64	30.8	30.8	10.2	10.2	38	38	12.3	12.3	10	10	20	20	78	78	7.8	7.8	110	110	4.25	4.25	144	144	140	140	3.8	3.8	1.2
0	0	1	8	14	6	4	4	0	2	0	0	0	0	0	0	0	0	0	0	0	1.45833	73	25.6	25.9	8.9	8.9	309	318	8.1	9.7	11	17	16	22	50	84	8.2	8.6	105	108	2.37	5.82	65	106	138	142	2.9	3.7	0.6
0	0	1	8	8	5	1	2	1	5	0	0	0	0	0	0	0	0	0	0	0	5.83333	65	22.3	25	7.4	8.1	125	168	9.4	10.6	6	6	23	26	6	9	7.6	8	104	111	0.37	0.56	97	101	136	140	3.5	4.1	0.8
0	0	1	11	10	5	1	4	0	4	0	0	0	0	0	0	0	0	0	0	0	4.04167	63	18.5	18.5	6.3	6.3	22	22	10	10	11	11	21	21	55	55	8.2	8.2	114	114	1.29	1.29	133	133	146	146	3.8	3.8	5.4
0	0	4	12	8	5	1	2	3	0	0	0	0	0	1	0	0	0	0	0	0	3.625	46	26.3	30.2	8.9	10.7	70	70	3.5	3.5	11	11	19	19	5	5	7.3	7.3	112	112	0.63	0.63	66	66	142	142	3.6	3.6	0.6
0	0	1	7	10	6	1	3	0	0	0	0	0	0	1	0	0	0	0	0	0	5.04167	57	20.3	20.5	6.5	6.6	234	234	11.1	11.1	10	10	21	21	25	25	8.1	8.1	109	109	0.6	0.6	213	213	140	140	3.1	3.1	2.1
0	1	1	3	15	6	5	4	0	3	0	0	0	0	0	0	0	0	0	0	0	1	22	37.1	37.1	12.1	12.1	146	146	11.8	11.8	7	7	25	25	11	11	7.8	7.8	110	110	1.16	1.16	103	103	142	142	3.8	3.8	2.5
0	1	2	7	14	6	4	4	0	2	0	0	0	0	0	0	0	0	0	0	0	3.33333	74	33	33	10.6	10.6	226	226	13.1	13.1	10	10	27	27	45	45	8.4	8.4	102	102	2.12	2.12	231	231	139	139	3.6	4.2	1.9
0	1	1	16	3	1	1	1	2	2	0	0	0	0	0	0	0	0	0	0	1	8.625	36	36.3	36.3	13.2	13.2	182	182	26.3	26.3	11	16	19	28	28	38	6.6	7	96	104	4.23	6.8	96	400	131	144	3.3	4.6	3
0	1	4	15	8	5	1	2	2	2	0	0	0	0	0	0	0	0	0	0	0	2.91667	64	29.6	29.6	9.5	9.5	22	22	29.8	29.8	19	19	16	16	21	21	7.9	7.9	103	103	2.85	2.85	77	77	138	138	5	5	12.3
0	1	1	2	8	5	1	2	0	3	0	0	0	0	0	0	0	0	0	0	0	1.16667	56	34.1	34.1	11.1	11.1	404	404	15.4	15.4	8	8	27	27	10	10	7.7	7.7	99	99	0.81	0.81	104	104	134	134	3.9	3.9	2.3
0	1	4	8	3	1	1	1	2	0	0	0	0	0	0	0	0	0	0	0	1	9.91667	73	29	29	9.4	9.9	318	354	24.4	27.1	9	10	26	26	32	39	7	7.5	101	106	1.18	1.34	118	222	137	141	3.7	3.9	1.3
0	0	1	3	14	6	4	4	0	2	0	0	0	0	0	0	0	0	0	0	0	2.75	91	29.9	29.9	9.5	10.8	421	421	22.4	22.4	9	9	22	22	25	25	8.2	8.2	108	108	1.06	1.06	97	97	139	139	3.6	3.7	0.8
0	0	1	8	15	6	5	4	2	0	0	0	0	0	0	0	0	0	0	0	0	2.91667	76	36.8	37.9	11.6	11.9	297	297	22.4	22.4	12	12	22	22	29	29	7.4	7.4	107	107	2.19	2.19	149	149	141	141	3.4	3.8	1.7
0	0	1	14	3	1	1	1	6	2	0	0	0	0	0	0	0	0	0	0	0	9.33333	83	43.2	51.5	13.2	15.3	93	162	4.6	9.8	11	13	18	25	47	52	7.5	8.5	119	122	1.57	1.76	192	375	151	155	2.7	3.8	6
0	0	1	2	14	6	4	4	0	0	0	0	0	0	4	0	0	0	0	0	0	1.75	76	27.7	27.7	9.5	9.5	555	555	23.8	23.8	8	11	27	29	3	4	7.9	8	83	84	0.25	0.35	79	91	120	121	3.2	3.6	0.8
0	0	1	5	8	5	1	2	0	0	3	0	0	0	0	0	0	0	0	0	0	1.29167	70	32.4	39.2	11	13.1	164	209	9.5	11.5	9	12	22	23	27	32	8.1	8.8	108	110	0.88	0.91	190	280	142	142	4	4.6	3.5
0	0	1	2	15	6	5	4	0	0	0	0	0	0	0	0	0	0	0	0	0	1.25	60	33.7	35.5	11.2	11.9	230	243	13.5	16.4	7	8	24	26	5	5	8.8	9.2	96	98	0.67	0.72	91	131	128	131	3.9	4	1.2
0	1	1	6	8	3	1	4	0	4	0	0	0	0	0	0	0	0	0	0	0	6.08333	68	27.7	27.7	8.9	8.9	165	165	12.4	12.4	7	7	21	21	39	39	8.8	8.8	111	111	1.9	1.9	203	203	139	139	4	4	1.1
0	1	1	15	7	2	1	4	0	1	0	0	0	0	0	0	0	0	0	0	0	2.95833	58	37.9	40	13.4	13.9	67	72	4.7	4.9	17	17	19	25	96	98	6	6.2	102	110	3.38	3.88	93	147	144	146	2.6	3.1	1.3
0	1	1	10	8	5	1	2	2	3	0	0	0	0	0	0	0	0	0	0	0	6.16667	62	28.5	32.8	8.2	9.4	354	440	3.8	4.7	8	12	19	21	29	36	7.9	8.2	112	113	1.32	2.11	51	168	142	144	4.1	4.3	3.9
0	0	1	6	8	5	1	2	2	0	0	0	0	4	0	0	0	0	0	0	0	4.79167	89	30.3	30.3	10.4	10.4	210	210	18.6	18.6	6	8	14	16	30	39	6.4	7.8	122	127	0.81	0.94	149	171	145	149	3.3	4.7	1.3
0	0	1	7	6	4	1	1	0	0	0	0	0	5	0	0	0	0	0	0	0	11.4583	39	26.8	26.8	8.6	8.6	178	178	7.1	7.1	7	7	24	24	30	30	7.3	7.3	108	108	1.52	1.52	163	163	139	139	4	4	2.1
0	0	3	4	14	6	5	3	0	0	0	0	0	5	0	0	0	0	0	0	0	1.54167	37	36.7	36.7	11.8	11.8	219	219	11.9	11.9	8	8	25	25	4	4	8.4	8.4	102	102	0.53	0.53	207	207	135	135	3.7	3.7	0.9
0	1	1	10	14	6	4	4	3	0	0	0	0	2	0	0	0	0	0	0	0	1.79167	23	35	31.9	11.6	10.5	98	74	8.8	7.4	13	13	22	22	88	88	5.9	5.9	97	97	4.45	4.45	89	89	132	132	3.7	3.7	0.5
1	1	1	9	3	1	1	1	1	0	0	0	0	1	0	0	0	0	0	0	0	3.79167	38	29.4	29.4	10.5	10.5	154	154	28	28	6	6	26	26	22	22	7.7	7.7	98	98	0.83	0.83	107	107	130	130	3.8	3.8	1.1
0	1	1	10	3	1	1	1	0	0	0	0	0	0	0	0	0	0	0	0	0	1.08333	56	26	27.3	8.4	8.9	95	102	4	7.3	7	8	19	20	33	40	7.6	7.7	113	115	1.33	1.57	128	144	140	142	4.7	5	1.2
0	1	1	8	7	5	1	1	0	0	0	0	0	0	0	0	0	0	0	0	0	2.83333	66	27.6	30.2	8.7	9.3	225	280	7.9	10.2	9	13	22	25	6	11	7.7	8	108	109	0.46	0.67	176	189	141	144	3.2	4.9	3.1
0	1	4	12	7	5	1	1	8	0	0	0	0	5	0	0	0	0	0	0	0	14.125	45	29.8	29.8	10	10	72	72	9	9	10	10	23	23	22	22	7.5	7.5	108	108	0.95	0.95	177	177	141	141	3.4	3.4	4.7
1	1	1	18	3	1	1	1	2	0	0	0	0	2	0	0	0	0	0	0	0	3.25	53	35.7	36.6	12.4	12.9	21	94	4.3	8.1	14	21	11	19	24	51	6.5	7	98	125	0.59	2.4	63	646	129	157	1.9	6.9	2.3
0	0	1	5	15	6	5	4	1	4	0	0	0	0	0	0	0	0	0	0	0	2.54167	72	30	30	9.5	9.5	358	358	14	14	12	12	24	24	24	24	7.2	7.2	104	104	1.62	1.62	107	107	140	140	3.6	3.6	1.8
0	1	2	6	13	6	4	3	0	6	0	0	0	0	0	0	0	0	0	0	1	1.95833	51	23.2	23.2	7.6	7.6	431	431	21.6	21.6	12	14	18	20	29	46	7.8	8.8	107	110	4	5.4	104	210	140	141	4.1	4.3	0.5
1	1	1	8	3	1	1	1	1	4	0	0	0	0	0	0	0	0	0	0	0	8.75	68	25.1	25.1	8.3	8.3	214	214	7.9	7.9	6	7	31	34	29	31	8.2	8.2	99	100	1.51	1.55	174	185	138	139	3.9	4.8	1.9
0	1	1	7	15	6	5	4	0	0	0	0	0	1	0	0	0	0	0	0	0	2.83333	85	24.1	24.1	7.9	7.9	49	49	1.3	1.3	8	8	22	22	33	33	7.7	7.7	105	105	0.91	0.91	97	97	135	135	3.8	3.8	0.7
0	1	1	10	15	6	5	4	1	0	0	0	0	3	0	0	0	0	0	0	0	1.91667	85	30.9	30.9	10.5	10.5	56	56	2.6	2.6	10	10	21	21	37	37	7.6	7.6	103	103	1.37	1.37	91	91	134	134	3.9	3.9	1.8
0	1	1	6	15	6	5	4	0	4	0	0	0	0	0	0	0	0	0	0	0	2.25	68	30.7	30.7	9.9	9.9	198	198	6.9	6.9	11	11	24	26	29	42	7.5	8.1	102	109	2.27	2.37	93	221	142	145	3.3	4.6	1.7
1	1	2	9	3	1	1	1	0	0	0	0	0	2	0	0	0	0	0	0	1	4.5	63	29.7	29.7	9.8	9.8	100	100	20.4	20.4	11	11	24	24	55	55	8.5	8.5	104	104	7.28	7.28	134	134	139	139	4.7	4.7	1.4
0	0	1	9	4	1	1	2	3	0	0	0	0	3	0	0	0	0	0	0	0	15.0417	19	39.4	39.4	10.1	10.1	156	156	22.4	22.4	11	20	20	25	52	85	7.6	9.6	126	132	1.2	1.9	586	1791	162	172	2.6	6.3	3
0	0	1	11	6	1	1	4	0	0	2	0	0	0	0	0	0	0	0	0	0	10.375	18	35.3	35.3	10.9	10.9	172	172	10.4	10.4	12	12	20	20	11	11	9.2	9.2	114	114	0.54	0.54	110	110	146	146	2.6	4	1.2
0	0	4	9	8	5	1	2	1	0	0	0	0	0	0	0	0	0	0	0	0	1.625	18	29.1	29.3	9.8	9.8	126	146	9.4	10.5	8	9	18	18	7	7	6.6	6.7	117	117	0.62	0.62	124	127	143	144	3.7	4.1	1.1
0	0	1	14	3	1	1	1	2	3	0	0	0	0	0	0	0	0	0	0	1	9.70833	27	23	25.1	8.5	9.5	147	172	14.8	32.2	10	20	15	27	17	40	6.5	6.9	107	114	1.19	1.98	124	298	141	151	3	4.7	1.8
0	0	4	6	14	6	5	3	3	1	0	0	0	0	0	0	0	0	0	0	0	1.66667	31	24.6	32.9	8.6	11.3	119	128	21.3	30	12	14	14	17	13	15	6.5	7	110	112	1.33	1.39	104	123	139	140	3.5	4.3	1.8
0	1	2	5	10	5	2	3	0	1	0	0	0	0	0	0	0	0	0	0	0	5.79167	22	27.5	27.5	9.2	9.2	357	357	14.5	14.5	8	8	28	28	16	16	8.2	8.2	105	105	0.54	0.54	97	97	141	141	4.2	4.2	2.4
0	1	2	10	7	4	2	1	0	3	0	0	0	0	0	0	0	0	0	0	0	2.04167	22	23.2	25.5	7.4	8.3	165	198	19.2	23.2	12	17	16	18	7	13	8.1	8.6	113	120	0.62	0.63	61	135	146	150	3.4	3.9	1.2
0	0	4	9	8	5	1	2	4	0	0	0	0	0	0	0	0	0	0	0	1	14.1667	53	23.4	31.8	7.6	9.9	140	272	4	14.2	15	22	4	21	24	65	6.2	7.4	109	117	2.41	6.14	78	263	141	148	3.4	5.4	2.1
1	1	1	7	10	5	2	3	1	2	0	0	0	0	0	0	0	0	0	0	1	4.41667	71	33.4	36.5	9.9	10.8	173	213	14.9	15.1	10	11	19	20	75	76	9.1	9.2	110	113	3.3	3.4	264	352	140	143	4	4	0.7
0	1	1	11	3	1	1	1	0	0	0	0	0	1	0	0	0	0	0	0	0	16.3333	51	35.6	35.6	12.2	12.2	218	218	26.7	26.7	10	14	16	20	27	30	7	7.2	117	119	1.31	1.56	118	650	147	149	3	4.7	3.2
1	1	1	5	7	4	1	2	0	0	5	0	0	0	0	0	0	0	0	0	0	7	85	37.9	37.9	12.9	12.9	163	163	7.1	7.1	9	9	25	25	23	23	8.2	8.2	111	111	0.98	0.98	100	100	145	145	3.9	3.9	1.8
0	1	1	3	14	6	4	4	0	0	2	0	0	0	0	0	0	0	0	0	0	2.33333	68	37.6	37.6	12.6	12.6	225	225	20.8	20.8	12	12	21	21	36	36	8.9	8.9	110	110	1.42	1.42	177	177	143	143	3.6	4.1	2.7
0	1	1	11	3	1	1	1	0	5	0	0	0	0	0	0	0	0	0	0	0	11.625	61	31.5	31.5	10.7	10.7	36	36	14.2	14.2	14	14	18	18	16	16	8.1	8.1	115	115	0.64	0.64	100	100	147	147	3.2	3.5	3.7
1	0	1	6	9	1	4	4	0	0	0	0	0	0	0	0	0	0	0	0	0	1.625	75	22.4	22.4	7.9	7.9	150	150	12.2	12.2	7	7	21	21	39	39	7	7	113	113	0.51	0.51	107	107	141	141	3.3	3.3	2.5
0	0	1	9	14	6	4	4	0	0	0	0	0	0	2	0	0	0	0	0	0	3.41667	75	30.3	30.3	10.5	10.5	318	318	40.4	40.4	11	12	17	21	48	58	6.8	7.4	90	96	2.78	2.96	95	104	122	125	4.1	4.4	1.3
0	1	1	11	4	1	1	2	2	3	0	0	0	0	0	0	0	0	0	0	0	1.125	83	28.7	35.2	9.3	11	110	145	26	34.8	11	17	14	21	33	34	7.1	7.3	112	114	2.1	2.4	183	185	144	145	3.5	3.8	2.8
0	0	1	10	13	6	4	3	2	0	0	0	0	4	0	0	0	0	0	0	0	1.91667	62	23.7	23.7	7.8	7.8	171	171	7.7	7.7	9	10	16	18	3	5	7.2	7.4	120	123	0.47	0.7	112	139	146	150	2.9	3.8	0.5
1	0	1	8	6	4	1	1	4	0	0	0	0	3	0	0	0	0	0	0	0	2.29167	75	39.6	39.6	13.5	13.5	269	269	32.1	32.1	8	8	25	25	30	30	8.3	8.3	98	98	0.92	0.92	196	196	131	131	4	4	1.9
0	0	1	7	8	5	1	2	0	0	0	0	0	0	3	0	0	0	0	0	0	4.95833	80	27.9	27.9	9.8	9.8	170	170	17.2	17.2	9	9	21	21	39	39	6.3	6.3	112	112	0.92	0.92	253	253	142	142	4.7	4.7	2.1
1	0	1	6	3	1	1	1	1	6	0	0	0	0	0	0	0	0	0	0	0	5.25	76	33.1	33.8	10.4	10.7	201	209	26.8	27.8	6	6	25	26	37	43	8.4	8.8	109	110	1.15	1.4	197	220	141	141	3.7	4.3	1.4
0	0	1	5	15	6	5	4	0	4	0	0	0	0	0	0	0	0	0	0	0	1.04167	84	35.5	35.5	10.6	10.6	262	262	7	7	5	5	39	39	17	17	7.2	7.2	97	97	0.23	0.23	108	108	141	141	4	4	0.8
0	0	1	12	6	4	1	1	6	4	0	0	0	0	0	0	0	0	0	0	0	3.20833	79	25.5	25.5	8.1	8.1	440	440	22	22	16	16	20	20	188	188	8.9	8.9	103	103	2.9	2.9	246	246	139	139	4.8	4.8	3.6
0	0	1	6	7	5	1	1	0	2	0	0	0	0	0	0	0	0	0	0	0	3.875	62	29.9	30.5	9	9.2	320	377	5.3	17.7	13	13	29	29	20	20	8.3	8.3	95	95	1	1	141	141	137	137	2.5	2.5	1.2
0	0	1	3	15	6	5	4	0	0	0	0	0	4	0	0	0	0	0	0	0	1.20833	68	32.1	32.1	10.8	10.8	171	171	9.7	9.7	8	8	25	25	9	9	8.5	8.5	110	110	0.61	0.61	120	120	143	143	3.6	3.6	1.7
0	0	1	8	15	6	5	4	3	0	0	0	0	6	0	0	0	0	0	0	0	1.625	48	40.4	40.4	13.2	13.2	214	214	46.8	46.8	13	13	17	17	23	23	6.9	6.9	110	110	2.17	2.17	79	79	140	140	4.1	4.1	2.6
0	0	1	4	4	1	1	2	0	0	2	0	0	0	0	0	0	0	0	0	0	2.625	73	32.3	32.3	10.3	10.3	404	404	13.8	13.8	8	8	27	27	7	7	7.5	7.5	110	110	0.61	0.61	174	174	145	145	3.6	4	0.9
0	1	1	4	15	6	5	4	0	3	0	0	0	0	0	0	0	0	0	0	0	2.91667	60	35.8	35.8	12.4	12.4	279	279	11.3	11.3	9	9	20	20	23	23	7.4	7.4	104	104	0.82	0.82	144	144	133	133	4.4	4.4	1.4
0	1	4	11	10	5	2	3	0	1	0	0	0	0	0	0	0	0	0	0	0	1.08333	66	23	23	7.9	7.9	39	39	7.4	7.4	13	13	16	16	58	58	8.4	8.4	110	110	2.78	2.78	81	81	139	139	3.8	3.8	3.3
0	1	3	7	12	5	4	3	3	0	0	0	0	0	0	0	0	0	0	0	0	2.83333	65	24.1	24.1	7.3	7.3	307	307	20.4	20.4	11	11	17	17	44	44	6.6	6.6	113	113	1.8	1.8	140	140	141	141	4.7	4.7	2.5
1	1	1	23	3	1	1	1	9	4	0	0	0	0	0	0	0	0	0	0	1	2.45833	57	15.1	26.7	5.4	8.9	25	72	6.5	15.2	16	30	11	24	34	104	6.8	8	98	105	2.79	6.22	76	137	137	143	4.1	5.8	9.5
0	1	1	10	9	5	1	3	2	2	0	0	0	0	0	0	0	0	0	0	0	2.29167	52	40.6	43	12.6	13.4	244	267	16.6	17.4	6	6	34	34	29	29	8	8	100	100	1.18	1.18	140	140	140	140	4	4	1.1
0	1	4	9	10	6	1	3	1	3	0	0	0	0	0	0	0	0	0	0	0	1.70833	52	46.2	46.2	13.5	13.5	208	208	9.7	9.7	5	5	32	32	48	48	8.6	8.6	102	102	1.24	1.24	92	92	139	139	5	5	1.8
0	1	1	6	15	6	5	4	0	0	0	0	0	5	0	0	0	0	0	0	0	1.5	72	31.8	31.8	9.8	9.8	132	132	6.9	6.9	8	8	23	23	16	16	7.7	7.7	116	116	1.08	1.08	133	133	147	147	4	4	0.9
0	1	1	9	3	1	1	1	0	0	0	0	0	0	3	0	0	0	0	0	0	16.8333	27	21	27	7.1	9.2	234	450	28.4	39.8	7	11	25	28	54	65	8	9.3	100	101	2.63	3.19	66	131	132	139	4.3	5.3	2.2
0	1	1	13	3	1	1	1	3	4	0	0	0	0	0	0	0	0	0	0	0	12.5833	27	35.8	41.8	12.4	14.5	58	121	1.4	5.5	16	19	13	20	23	40	5.9	7.6	103	108	2.3	3.2	100	142	139	141	3.6	4.2	4.4
0	1	1	5	8	5	1	2	0	3	0	0	0	0	0	0	0	0	0	0	0	1.79167	55	41.3	41.3	13.9	13.9	644	644	44.9	44.9	11	12	18	23	51	54	7.3	7.5	96	97	1.2	1.21	152	171	126	130	4.5	5	2.2
0	1	1	6	9	5	1	3	0	0	0	0	0	3	0	0	0	0	0	0	0	3.33333	75	28.7	28.7	8.4	8.4	131	131	12.4	12.4	10	8	38	39	62	62	8.5	8.5	93	93	1.05	1.05	125	125	140	140	2.3	3	1
0	1	1	5	15	6	5	4	0	0	0	0	0	0	0	0	0	0	0	0	0	2.04167	64	25.8	25.8	8.3	8.3	247	247	6.5	6.5	9	9	19	19	19	19	8.4	8.4	113	113	1.09	1.09	128	128	141	141	4.4	4.4	0.5
0	1	1	13	7	5	1	1	5	3	0	0	0	0	0	0	0	0	0	0	0	4.625	67	24.3	26.8	8.1	8.8	508	542	45.7	52.2	11	16	16	20	83	109	7.1	7.8	104	113	2.41	4.18	105	235	135	144	3.5	3.6	1.7
1	1	1	8	14	6	4	4	0	0	0	0	0	0	0	0	0	0	0	0	0	1.04167	74	38.4	38.4	11.7	11.7	138	138	9.5	9.5	10	10	23	23	37	37	8.4	8.4	108	108	1.73	1.73	89	89	141	141	5.5	5.5	2.7
0	1	1	5	15	6	5	4	1	0	3	0	0	0	0	0	0	0	0	0	0	1.95833	71	28.2	28.2	9.6	9.6	130	130	5.5	5.5	13	13	12	12	15	15	6.7	6.7	115	115	0.75	0.75	100	100	140	140	3.4	4.5	1.5
0	1	1	10	6	4	1	1	0	2	0	0	0	0	0	0	0	0	0	0	0	6.70833	78	23.5	26.7	7.7	8.9	134	134	19.6	19.6	11	17	18	25	57	87	8	8.4	108	112	1.35	2.19	120	150	144	147	4.9	6.1	8.3
0	1	4	4	14	6	5	3	0	0	0	2	0	0	0	0	0	0	0	0	0	1.625	54	31.6	31.6	9.7	9.7	258	258	18.2	18.2	5	5	23	23	54	54	6.7	6.7	114	114	4.91	4.91	159	159	142	142	5.6	5.6	1.1
0	1	1	12	14	6	5	3	2	5	0	0	0	0	0	0	0	0	0	0	0	1	91	33.3	34.3	11	11.3	118	126	65.5	70.2	12	13	14	16	70	70	8	8.4	117	118	2.7	2.71	77	82	145	145	4.5	5	3.3
0	0	1	5	7	4	1	2	0	0	0	0	0	1	0	0	0	0	0	0	0	6.33333	45	27.3	27.3	8.6	8.6	182	182	18.6	18.6	10	12	18	19	25	31	7.3	7.4	101	102	1.69	1.74	90	92	130	132	4.9	5.1	3.2
1	1	2	8	3	1	1	1	0	0	0	0	0	3	0	0	0	0	0	0	0	9.20833	62	29.2	29.2	10.5	10.5	46	46	21.5	21.5	13	14	20	22	43	45	6	6.8	118	118	1.14	1.2	96	96	152	153	2.5	3.3	0.7
0	1	1	6	13	6	5	2	0	2	0	0	0	0	0	0	0	0	0	0	0	1.5	91	35.2	35.2	11.7	11.7	262	262	19.5	19.5	9	9	20	20	21	21	7.7	7.7	115	115	0.64	0.64	120	120	144	144	3.1	4.5	1.5
0	0	1	8	3	1	1	1	0	0	2	0	0	0	0	0	0	0	0	0	0	4.66667	36	33	35.2	11.7	12.4	224	224	3.5	3.5	11	11	25	25	22	22	6.2	6.2	99	99	1.26	1.26	180	180	135	135	3.2	3.6	1.4
0	1	1	10	3	1	1	1	3	4	0	0	0	0	0	0	0	0	0	0	0	12.75	70	32.1	33.5	11.1	11.6	463	463	18.6	18.6	10	18	10	16	37	44	6.3	7	105	109	1.34	2.33	131	591	133	136	3.1	4.9	1.6
0	1	1	13	3	1	1	1	2	0	0	0	0	2	0	0	0	0	0	0	0	4.29167	74	30.3	30.3	10	10	208	208	7.9	7.9	6	6	21	21	45	45	7.6	7.6	108	108	1.52	1.52	143	143	135	135	5.2	5.2	1.6
0	1	1	4	13	6	4	3	1	4	0	0	0	0	0	0	0	0	0	0	0	3.29167	78	28.3	29.4	8.5	8.9	289	297	16	33.3	8	11	22	24	26	34	8.2	8.9	107	108	0.66	1	57	148	139	141	3.3	4.1	1.1
0	1	1	12	7	5	1	1	5	5	0	0	0	0	0	0	0	0	0	0	0	4.41667	64	27.7	29.5	9.2	9.9	211	239	10	10.9	10	14	14	20	47	72	7.9	8.4	108	110	2.31	3.7	131	194	138	140	3.6	5.4	1.1
0	1	1	13	7	5	1	1	1	4	0	0	0	0	0	0	0	0	0	0	0	7.75	83	38.6	38.6	13.3	13.3	182	182	5.4	5.4	7	7	23	23	72	72	8.7	8.7	116	116	1.02	1.02	60	60	146	146	3.9	3.9	1.5
0	0	3	5	10	5	1	4	0	0	0	0	0	1	0	0	0	0	0	0	1	1.54167	36	37.1	37.1	11.4	11.4	179	179	9	9	9	9	26	26	39	39	8.4	8.4	104	104	3.78	3.78	99	99	139	139	4.9	4.9	0.6
0	0	3	6	5	3	1	1	0	0	0	0	0	0	0	0	0	0	0	0	1	2.54167	36	35.2	35.2	11.1	11.1	177	177	1.5	1.5	12	12	26	26	49	49	7.8	7.8	102	102	3.67	3.67	101	101	140	140	3.9	3.9	0.9
1	1	1	8	9	6	1	2	3	3	0	0	0	0	0	0	0	0	0	0	0	2.16667	84	23.5	29.3	7.9	9.5	253	259	1.3	1.8	10	11	17	21	16	16	6.8	7.4	105	111	0.88	1	149	187	136	139	3.4	3.7	4.3
0	1	1	6	13	6	4	3	0	3	0	0	0	0	0	0	0	0	0	0	0	1.45833	89	31.4	36.7	11	13	154	180	11	18.4	6	9	26	26	24	26	7.7	8.3	100	104	1.02	1.03	100	144	135	136	3.5	3.9	0.8
0	1	1	5	11	5	3	3	2	0	0	0	0	1	0	0	0	0	0	0	0	1.91667	63	25.3	25.3	8.4	8.4	142	142	1.1	1.1	7	7	22	22	17	17	8.2	8.2	110	110	0.68	0.68	144	144	139	139	3.7	3.7	0.5
0	1	1	9	14	6	5	3	1	1	0	0	0	0	0	0	0	0	0	0	0	1.54167	69	36.2	36.2	12	12	52	52	1.8	1.8	8	9	23	24	18	22	7.6	7.8	111	111	0.98	1.14	86	91	143	143	3.7	4.5	1.5
0	1	2	8	13	6	4	3	0	2	0	0	0	0	0	0	0	0	0	0	1	1.04167	82	20	28.7	6.4	9.6	158	195	7.7	8.2	6	7	26	29	22	33	8.6	9.6	99	105	4.38	6.13	153	212	134	138	4.4	5.2	1.1
0	1	2	6	13	6	4	3	0	2	0	0	0	0	0	0	0	0	0	0	1	1.25	82	19	29.2	6.2	9.9	109	124	11	13.6	8	8	31	31	23	23	8.8	8.8	99	99	5.44	5.44	126	126	138	138	4	4	0.8
0	1	1	11	15	6	5	4	2	1	0	0	0	0	0	0	0	0	0	0	0	1.95833	52	40.2	40.2	13.7	13.7	60	60	15.4	15.4	12	12	18	18	34	34	7	7	105	105	1.97	1.97	138	138	135	135	4.6	4.6	3.1
1	1	1	10	7	5	1	1	2	0	0	0	0	4	0	0	0	0	0	0	0	1.375	84	30.7	30.7	9.7	9.7	280	280	22.6	22.6	8	8	22	22	53	53	8.3	8.3	116	116	2.64	2.64	254	254	146	146	5.2	5.6	1.3
0	1	1	9	15	6	5	4	2	0	0	0	0	1	0	0	0	0	0	0	0	1.95833	85	30.2	30.2	9.8	9.8	95	95	11.4	11.4	9	9	22	22	16	16	7.6	7.6	111	111	1.12	1.12	197	197	142	142	4.4	4.4	2.3
0	1	1	5	15	6	5	4	0	0	0	0	0	0	0	0	0	0	0	0	0	4.5	91	27.6	27.6	9.1	9.1	158	158	6.9	6.9	11	11	16	16	47	47	8.9	8.9	113	113	3.06	3.06	125	125	140	140	3.9	3.9	1.9
0	1	1	16	6	1	1	4	4	0	0	0	0	4	0	0	0	0	0	0	0	6.5	67	21.5	24.1	6.9	8.3	57	90	7.7	13.4	14	14	23	23	32	32	7.4	7.4	107	107	1.68	1.68	86	86	144	144	3.4	3.4	0.5
1	1	1	2	4	1	1	2	0	0	0	0	0	4	0	0	0	0	0	0	0	15.0833	75	34.5	34.5	11.9	11.9	295	295	21.6	21.6	10	10	21	21	24	24	9.3	9.3	103	103	0.79	0.79	150	150	134	134	4.1	4.1	1.8
0	1	1	13	3	1	1	1	1	1	0	0	0	0	0	0	0	0	0	0	0	1.33333	64	32.3	33	10.9	11.1	43	36	15.4	15.5	10.4	10.5	21	21	27	25	6.6	6.4	105	105	1.01	0.8	80	84	133	135	3.7	3.8	2.1
0	1	4	14	3	1	1	1	2	0	0	0	0	2	0	0	0	0	0	0	0	12.0417	54	37.3	37.9	12.3	12.4	218	222	10.1	10.7	12	12	21	21	28	28	8.2	8.2	116	116	1	1	187	187	149	149	4	4	2.1
1	1	1	9	7	5	1	1	5	0	0	0	0	1	0	0	0	0	0	0	0	2.29167	72	30.9	33.7	10.2	11.3	323	323	32.9	32.9	11	11	18	19	51	58	7.3	7.7	104	108	2.03	2.19	115	363	133	138	4	4.3	1.1
0	1	1	6	15	6	5	4	0	0	0	1	0	0	0	0	0	0	0	0	0	1.29167	65	37.8	41.1	13.1	13.8	51	59	7.3	9.4	5	10	22	24	32	39	8	8.6	108	108	1.15	1.37	216	438	137	140	3.4	4.7	0.8
0	1	1	8	7	4	1	2	0	3	0	0	0	0	0	0	0	0	0	0	0	7.04167	20	17.2	17.2	6.1	6.1	27	27	1.3	1.3	9	12	18	21	21	27	7.6	7.7	97	98	0.87	0.94	120	122	127	128	4.2	4.5	1.8
0	1	1	9	8	5	1	2	0	1	0	0	0	0	0	0	0	0	0	0	0	1.25	89	34.7	33.3	11.2	10.7	138	134	9.9	9.36	13.2	13	21	21	25	25	8.4	9.3	104	106	1.01	0.89	134	105	137	139	3.6	3.6	1.2
0	1	4	3	10	5	2	3	0	0	0	0	0	1	0	0	0	0	0	0	0	1.16667	42	22.7	22.7	7.5	7.5	407	407	25.3	25.3	7	21	7	15	13	24	8.1	9	114	120	0.52	0.63	137	279	140	144	2.9	4.2	1.3
1	0	1	7	3	1	1	1	2	0	0	0	0	2	0	0	0	0	0	0	0	2.83333	67	21.3	21.3	6.8	6.8	154	154	33.6	33.6	13	13	13	13	91	91	6.8	6.8	119	119	2.4	2.4	90	90	145	145	5.2	5.2	3.3
0	1	1	4	15	6	5	4	0	3	0	0	0	0	0	0	0	0	0	0	0	1.25	75	21.6	21.6	7.3	7.3	72	72	1.8	1.8	9	9	23	23	10	10	7.9	7.9	103	103	0.92	0.92	147	147	135	135	3.4	3.4	1.4
0	1	4	6	14	6	5	3	0	2	0	0	0	0	0	0	0	0	0	0	0	1.16667	52	37.9	41	12.9	13.7	58	59	8.2	16.8	8	10	20	22	30	32	7.3	7.7	106	111	1.47	1.92	147	350	138	141	4	4.6	2.9
0	1	4	9	3	1	1	1	4	0	0	0	0	3	0	0	0	0	0	0	0	1.33333	57	24.7	31.1	8.4	11.2	144	171	6.5	7.7	9	9	22	24	10	13	7.8	7.8	101	101	0.46	0.48	76	80	132	134	3.2	3.4	1.1
0	1	1	5	14	6	4	4	0	3	0	0	0	0	0	0	0	0	0	0	0	1.79167	91	28.4	32.6	9.3	11.1	211	211	5.3	5.3	3	3	23	23	28	28	7	7	108	108	1.1	1.1	180	180	134	134	3.9	3.9	0.9
0	1	1	14	8	5	1	2	3	2	0	0	0	0	0	0	0	0	0	0	1	5.75	82	30.9	30.9	9.1	9.1	277	277	12.4	12.4	11	11	26	26	17	17	7.8	7.8	101	101	2.52	2.52	91	91	138	138	4.5	4.6	1.8
0	1	1	5	9	4	1	4	0	0	4	0	0	0	0	0	0	0	0	0	0	1.54167	64	33	33.6	10.7	10.8	75	78	0.7	0.7	6	6	24	24	32	32	7.6	7.6	108	108	1.92	1.92	185	185	138	138	4.6	4.6	1.2
0	1	1	8	3	1	1	1	0	0	0	0	0	2	0	0	0	0	0	0	0	10.875	53	37.9	42.1	12.3	13.8	171	193	29	30.4	6	7	26	28	43	45	7.5	7.6	113	115	0.48	0.5	144	146	147	148	4.6	4.8	2.1
0	1	1	12	11	6	1	4	0	2	0	0	0	0	0	0	0	0	0	0	0	1.54167	69	43	42	13.8	13.6	56	42	17	15.1	16	17	23	24	75	73	8	8.2	109	114	2.38	2.17	116	163	146	151	3.9	4.1	1.4
0	0	1	12	13	5	5	3	1	0	0	0	0	2	0	0	0	0	0	0	1	5.04167	84	26.3	30.3	8.4	9.6	133	133	19.1	19.1	11	11	23	23	39	39	8.8	8.8	100	100	2.91	2.91	140	140	134	134	5	5	3.3
0	1	1	11	6	4	1	1	0	0	0	0	0	1	0	0	0	0	0	0	0	2.41667	64	36.5	36.5	13	13	137	137	26.6	26.6	9	9	26	26	12	12	8.3	8.3	99	99	0.88	0.88	185	185	134	134	4.1	4.1	1.4
0	1	1	12	4	1	1	2	4	3	0	0	0	0	0	0	0	0	0	0	0	6.83333	63	22.9	22.9	7.9	7.9	134	134	18	18	7	7	21	21	56	56	6.7	6.7	101	101	2.2	2.2	138	138	129	129	3.9	3.9	1
1	1	3	11	3	1	1	1	5	0	0	0	0	0	0	0	0	0	0	0	0	2.66667	58	32	35.2	10.9	12	80	80	6.4	6.4	7	7	21	21	19	19	6.4	6.4	117	117	0.8	0.8	126	126	145	146	3.6	4.8	1.4
0	1	1	12	8	5	1	2	3	0	1	0	0	0	0	0	0	0	0	0	1	4.83333	66	22.6	22.6	7.3	7.3	72	72	14.6	14.6	11	11	24	25	146	157	8	8.1	101	102	2.23	2.31	115	139	136	138	3.8	4.2	1.2
0	1	3	9	8	5	1	2	1	0	0	0	0	2	0	0	0	0	0	0	0	3.66667	65	28.1	28.1	9.5	9.5	115	115	19.1	19.1	11	11	19	19	42	42	8.3	8.3	108	108	1.18	1.18	187	187	138	138	4.3	4.3	4.8
0	1	4	11	15	6	5	4	1	4	0	0	0	0	0	0	0	0	0	0	1	5.79167	74	31.9	31.9	9.5	9.5	157	157	28.2	28.2	12	14	21	23	25	28	8	8.5	105	106	3.57	4.01	102	156	140	141	4.2	4.6	2.8
0	1	1	4	15	6	5	4	0	0	0	0	0	0	0	0	0	0	0	0	0	2.25	79	39.5	39.5	12.8	12.8	220	220	19.5	19.5	8	8	29	29	82	82	8.9	8.9	103	103	2.1	2.1	149	149	140	140	3.4	3.4	1.5
0	1	4	7	15	6	5	4	0	2	0	0	0	0	0	0	0	0	0	0	1	1.54167	56	20	21.6	7.2	7.9	210	238	11.7	30.3	10	17	20	23	29	34	6.5	7.5	86	102	8.49	8.88	104	818	122	134	2.1	3.6	1.6
0	1	1	4	8	3	4	1	0	3	0	0	0	0	0	0	0	0	0	0	0	5.375	81	31.5	31.5	10.3	10.3	252	252	8.6	8.6	9	9	33	33	22	22	8.6	8.6	97	97	0.72	0.72	166	166	139	139	3.4	3.4	0.8
0	1	1	11	7	5	1	1	1	2	0	0	0	0	0	0	0	0	0	0	0	14.375	42	33.7	35.5	11.5	12.6	118	133	4.4	18.4	11	14	17	21	42	49	6.5	6.7	99	100	3.82	4.21	114	140	131	134	3.8	4.1	2.7
0	1	1	6	14	6	4	4	0	0	1	0	0	0	0	0	0	0	0	0	0	2	80	42.1	42.1	13.1	13.1	179	179	17.2	17.2	6	6	34	34	37	37	8.4	8.4	100	100	1.18	1.18	98	98	140	140	3.8	3.8	0.8
0	1	3	7	7	5	1	1	2	3	0	0	0	0	0	0	0	0	0	0	0	8.58333	43	35.6	36	12.2	12.8	163	179	9.3	10.9	6	6	33	34	12	13	7.8	7.8	92	95	0.73	0.78	77	114	132	134	3.7	4	1.6
0	0	4	6	9	5	2	2	1	0	0	0	0	1	0	0	0	0	0	0	0	1.41667	74	38	38	12.6	12.6	138	138	13.2	13.2	5	5	27	27	38	38	9.3	9.3	112	112	1.26	1.26	131	131	144	144	3.8	4.5	1
0	0	1	10	9	5	1	3	2	0	0	0	0	3	0	0	0	0	0	0	0	7.95833	53	19.6	20.2	6.5	6.7	49	50	0.7	0.7	7	7	28	28	13	13	8.2	8.2	110	110	0.36	0.36	133	133	145	145	3.3	3.3	1.5
0	1	1	4	15	6	5	4	0	1	0	0	0	0	0	0	0	0	0	0	0	1.08333	34	40.4	40.4	13.2	13.2	178	178	12.4	12.4	7	7	26	26	15	15	7.2	7.2	103	103	1.1	1.1	107	107	136	136	3.4	3.4	1.2
0	1	1	7	14	5	5	4	3	3	0	0	0	0	0	0	0	0	0	0	0	2.45833	59	35.9	34.3	11.9	11.4	89	86	7.1	7.2	9	9	19	19	12	12	7.6	7.6	111	111	0.61	0.61	102	102	139	139	3.3	3.7	1.9
0	1	1	5	15	6	5	4	0	0	0	0	0	0	0	0	0	0	0	0	0	3.70833	58	44	44	15.2	15.2	123	123	8	8	8	12	18	24	22	27	8	8.6	105	106	1.89	2.05	106	133	136	138	3.5	4	1.9
0	1	1	11	6	4	1	1	0	0	0	0	0	1	0	0	0	0	0	0	0	3.5	59	30.7	32.3	10.3	10.9	117	130	3.9	6.6	8	9	22	25	17	19	7.4	7.8	105	112	0.57	0.58	87	102	138	143	3.4	3.7	1.6
0	1	1	5	11	6	2	3	0	0	4	0	0	0	0	0	0	0	0	0	0	1.08333	84	31.5	32.6	10.7	10.8	131	135	7	8.1	5	7	22	24	21	25	8.1	8.4	111	112	0.83	0.86	105	211	140	141	3.5	4.3	2.1
0	1	1	11	13	6	5	2	0	2	0	0	0	0	0	0	0	0	0	0	0	2.45833	24	29.1	29.7	9.7	9.8	355	359	9.5	10.8	9	10	24	25	40	40	7.4	7.7	88	92	0.68	0.68	80	134	122	126	4.4	4.5	4.3
0	1	1	10	14	6	4	4	2	0	0	0	0	1	0	0	0	0	0	0	1	1.58333	72	40.2	40.2	13.2	13.2	155	155	18.6	18.6	15	15	21	21	56	56	9.3	9.3	96	96	9.7	9.7	138	138	132	132	5.2	5.2	3.5
0	1	4	2	15	6	5	4	0	0	1	0	0	0	0	0	0	0	0	0	0	1	20	36.1	36.1	12.3	12.3	259	259	12.8	12.8	6	6	26	26	4	4	8.4	8.4	107	107	0.84	0.84	112	112	139	139	3.6	3.8	1.1
0	1	1	10	7	5	1	1	0	4	0	0	0	0	0	0	0	0	0	0	0	8.79167	21	26.5	27.1	9.1	9.3	63	73	16	18.3	9	9	18	18	4	4	7	7	118	118	0.65	0.65	140	140	145	145	3.4	3.9	1.8
0	1	1	13	13	6	4	3	1	0	0	0	0	2	0	0	0	0	0	0	1	3.20833	66	28.5	33.4	8.7	10.2	95	107	19.5	31.6	11	18	21	24	26	34	10	10	103	104	3.95	4.26	75	147	139	142	4.8	4.8	3.4
0	0	1	6	15	6	5	4	4	0	2	0	0	0	0	0	0	0	0	0	0	2.58333	82	27.7	27.7	9.2	9.2	159	159	9.1	9.1	9	9	24	24	34	34	7.8	7.8	105	105	0.86	0.86	219	219	138	138	3.4	3.9	1.6
0	0	1	13	13	6	4	3	0	0	0	0	0	3	0	0	0	0	0	0	1	1.04167	80	31.2	33.2	10.2	10.9	108	130	8.3	11.12	16.6	20	15	18	23	27	6.9	7.4	101	102	2.59	2.9	102	154	135	135	2.6	4.1	2
0	0	1	7	11	6	2	3	3	0	0	0	0	3	0	0	0	0	0	0	0	2.75	72	31.9	33.2	9.7	9.8	151	193	3.9	6	19	26	13	17	37	45	6.8	7.2	94	99	1.9	2	151	167	133	135	4.4	6.1	2
0	0	1	6	8	5	1	2	0	2	0	0	0	0	0	0	0	0	0	0	0	6.875	38	32.3	32.3	10.5	10.5	287	287	14.6	14.6	8	20	12	22	29	42	8.2	8.8	106	114	0.7	1.18	120	363	138	144	3.5	4.4	1.8
1	0	1	6	9	5	2	2	2	4	0	0	0	0	0	0	0	0	0	0	0	2.29167	91	31.6	31.6	9.8	9.8	133	133	15.2	15.2	11	11	20	20	26	26	7	7	112	112	0.59	0.59	86	86	143	143	3.7	3.7	1.4
0	0	1	7	9	5	1	3	1	0	0	0	0	2	0	0	0	0	0	0	0	4.45833	86	26.4	27.3	8.5	9	218	222	9.1	9.4	10	10	23	23	7	7	8	8	88	88	0.36	0.36	151	151	121	127	3.6	3.6	0.9
0	1	1	13	3	1	1	1	2	0	0	0	0	5	0	0	0	0	0	0	0	2.16667	35	28.4	28.4	9.1	9.1	102	102	5.8	5.8	10	10	21	21	34	34	8.2	8.2	119	119	0.82	0.82	104	104	150	150	3.3	3.3	1.2
0	1	1	11	3	1	1	1	2	3	0	0	0	0	0	0	0	0	0	0	0	3.79167	39	33.5	35.1	11.7	12.2	91	118	0.6	2	9	10	20	22	20	22	6.6	7.2	110	110	0.48	0.62	110	117	139	141	3.4	3.7	1.9
0	0	1	10	9	5	1	3	1	0	0	0	0	4	0	0	0	0	0	0	0	6.625	87	33	33.8	11.2	11.2	251	251	13.4	13.4	10	10	16	16	49	55	7.6	7.6	108	110	2.8	2.97	130	130	132	134	5	5.8	1.5
1	0	4	10	3	1	1	1	3	6	0	0	0	0	0	0	0	0	0	0	1	9.5	65	32.9	32.9	10.8	10.8	82	82	85.9	85.9	11	11	25	25	66	66	9.7	9.7	106	106	3.87	3.87	139	139	142	142	4.1	4.1	1.3
0	1	1	12	6	4	1	1	0	0	0	0	0	3	0	0	0	0	0	0	0	1.70833	65	33	33	11.1	11.1	55	55	5.5	5.5	7	8	23	23	20	21	7.5	7.6	109	110	0.79	0.9	95	110	140	140	3.7	3.8	2.2
1	1	1	11	7	5	1	1	3	0	0	0	0	4	0	0	0	0	0	0	0	4.625	81	36.4	36.4	12.5	12.5	113	113	8.4	8.4	11	11	26	26	23	23	7.7	7.7	108	108	0.67	0.67	184	184	145	145	2.8	3.6	3.5
0	1	1	8	8	5	1	2	0	0	0	0	0	2	0	0	0	0	0	0	0	4.79167	77	22.1	23.3	6.8	7.5	208	208	6.2	6.2	8	8	23	23	27	27	7.8	7.8	116	116	0.65	0.65	70	70	147	147	3.2	5.1	0.9
0	1	1	4	11	6	1	4	0	0	0	0	0	0	0	0	0	0	0	0	0	1	47	27	27	9.1	9.1	288	288	12.7	12.7	8	8	25	25	30	30	10	10	108	108	0.6	0.6	112	112	141	141	3.5	3.5	1.7
0	1	1	13	6	4	1	1	0	0	0	0	0	2	0	0	0	0	0	0	1	5.125	47	21.5	21.5	7	7	90	90	9	9	5	5	31	31	31	31	7.5	7.5	100	100	3.54	3.54	196	196	136	136	4.1	4.1	0.7
1	1	4	15	3	1	1	1	2	0	0	0	0	3	0	0	0	0	0	0	0	15.6667	23	21.7	21.7	7.2	7.2	22	22	0.4	0.4	15	16	16	16	24	29	7.2	7.2	105	108	2.08	2.7	106	108	137	139	4.2	5.2	5.2
0	1	1	7	13	6	4	3	2	2	0	0	0	0	0	0	0	0	0	0	0	2.25	84	14.7	25.7	4.4	7.8	182	218	7.6	10.4	7	12	19	23	31	46	7.1	7.8	108	113	1.7	2.2	128	177	138	144	4	4.1	1.2
0	0	1	3	13	5	4	4	0	0	2	0	0	0	0	0	0	0	0	0	0	2.625	82	47.2	47.2	15.3	15.3	207	207	21	21	6	10	20	22	42	61	9.9	10	129	133	0.88	1.47	102	135	157	160	2.9	4.5	1.3
0	0	4	5	15	6	5	4	0	2	0	0	0	0	0	0	0	0	0	0	0	1.83333	67	40.1	40.1	12	12	212	212	14.7	14.7	6	6	35	35	34	34	8.2	8.2	101	101	1.58	1.58	144	144	142	142	4.7	4.7	1
0	0	1	11	6	4	1	1	5	0	0	0	0	3	0	0	0	0	0	0	0	4.125	73	28.4	28.4	9.7	9.7	175	175	9.4	9.4	8	8	25	25	20	20	7.9	7.9	106	106	1.4	1.4	190	190	139	139	2.7	2.7	2.2
0	0	1	10	14	6	4	4	1	0	0	0	0	2	0	0	0	0	0	0	0	1.29167	67	31.9	31.9	10.1	10.1	394	394	26	26	9	9	27	28	41	42	7.9	8	101	103	2.57	2.96	249	255	138	139	3.6	4.6	1.5
0	0	1	8	3	1	1	1	0	0	0	0	0	7	0	0	0	0	0	0	0	13.125	72	28	28	8	8	350	350	27.3	27.3	6	6	24	24	9	9	6.6	6.6	116	116	0.7	0.7	76	76	146	146	3.9	3.9	2
0	0	1	18	14	6	5	3	4	0	0	0	0	1	0	0	0	0	0	0	1	1.79167	72	17.2	21.9	6	7.5	4	20	0.4	0.7	13	13	24	24	39	39	6.6	6.6	101	101	2.58	2.58	191	191	138	138	3.8	3.8	2.6
0	0	1	13	3	1	1	1	2	3	0	0	0	0	0	0	0	0	0	0	0	2.5	63	30.1	30.1	8.7	8.7	322	322	18	18	9	12	24	26	26	34	7.8	8.2	96	101	1.43	1.87	98	114	131	136	3.5	3.8	1.7
0	0	1	8	7	5	1	1	0	0	0	0	0	0	3	0	0	0	0	0	0	10.2917	80	26.7	30.3	8.8	10.1	130	148	10.2	11.9	3	11	18	20	18	23	6.3	7.6	116	120	0.6	0.7	143	429	139	149	3.3	4.5	1.8
0	0	1	10	9	5	1	3	2	6	0	0	0	0	0	0	0	0	0	0	0	7	75	25.8	25.8	8	8	270	270	23.4	23.4	7	7	27	27	16	16	8.3	8.3	110	110	0.7	0.7	124	124	144	144	3.4	3.8	1.3
0	0	1	7	15	6	5	4	2	3	0	0	0	0	0	0	0	0	0	0	0	1.625	76	31.5	39.2	10.1	12.6	312	414	14.4	16.8	7	11	19	21	58	62	7.6	9.4	102	112	1.81	2.97	100	122	132	140	3.8	4.4	1.5
0	0	1	6	14	6	4	4	0	4	0	0	0	0	0	0	0	0	0	0	0	1.08333	68	29.8	29.8	9.3	9.3	362	362	32.9	32.9	7	7	20	20	18	18	8.5	8.5	116	116	0.91	0.91	99	99	143	143	3.6	3.6	1.7
0	0	2	6	13	6	4	3	0	3	0	0	0	0	0	0	0	0	0	0	0	3.04167	64	27.5	27.5	9.5	9.5	197	197	34.1	34.1	14	14	17	17	63	63	8.2	8.2	109	109	1.66	1.66	88	88	140	140	3.6	3.6	3.3
1	0	1	19	3	1	1	1	5	0	0	0	0	1	0	0	0	0	0	0	1	1.20833	65	17.3	28.7	5.6	9.7	36	315	3.6	19.9	11	22	9	23	68	112	7	9.2	107	115	1.54	3.41	135	420	138	150	4.4	5.5	8.6
0	0	1	5	15	6	5	4	0	0	2	0	0	0	0	0	0	0	0	0	0	3.66667	62	26.3	26.3	9.2	9.2	339	339	16.4	16.4	12	12	16	16	57	57	7.8	7.8	101	101	2.12	2.12	218	218	129	129	4	4	1.7
0	0	1	8	14	6	5	3	0	1	0	0	0	0	0	0	0	0	0	0	1	2.08333	71	36.4	36.4	11.5	11.5	136	136	13.1	13.1	11	11	23	23	26	26	9.4	9.4	100	100	3.1	3.1	88	88	134	134	4.9	4.9	1.6
0	0	1	10	15	6	5	4	1	0	1	0	0	0	0	0	0	0	0	0	0	1.54167	70	36.8	36.8	12	12	297	297	10.3	10.3	8	12	19	24	71	91	7.5	7.8	111	118	2.9	4	86	141	142	146	3.2	4.2	0.9
0	1	1	5	15	6	5	4	0	2	0	0	0	0	0	0	0	0	0	0	0	5	91	31.1	31.1	10	10	109	109	15.6	15.6	9	9	22	22	22	22	8	8	115	115	0.78	0.78	99	99	146	146	3.5	3.8	4.4
0	0	1	12	11	6	1	4	0	4	0	0	0	0	0	0	0	0	0	0	0	3.375	61	26.6	30.9	8.1	9.3	129	131	15.6	16.1	12	17	13	15	57	64	7.2	7.6	117	120	3.7	4.8	197	489	142	150	4.3	5.5	2.4
0	0	1	7	10	5	2	3	2	3	0	0	0	0	0	0	0	0	0	0	0	2.83333	69	25.9	25.9	8.5	8.5	370	370	19.1	19.1	8	8	22	22	45	45	7.6	7.6	111	111	1.69	1.69	133	133	141	141	4.1	4.1	0.9
0	0	1	3	8	5	1	2	0	3	0	0	0	0	0	0	0	0	0	0	0	1.875	70	29	29	8.9	9.8	301	301	14	14	5	6	24	24	21	16	6.9	6.9	118	119	0.53	0.52	107	111	147	147	3.6	3.7	0.81
0	1	1	7	13	6	4	3	0	2	0	0	0	0	0	0	0	0	0	0	1	2.5	54	24.3	26.8	8	8.6	137	137	14.6	14.6	12	12	27	27	46	46	8.9	8.9	95	95	6.4	6.4	295	295	134	134	4	4	1.1
0	1	1	16	6	4	1	1	4	0	0	0	0	2	0	0	0	0	0	0	0	18	81	34.4	34.4	10.9	10.9	96	96	14.2	14.2	13	14	17	18	74	77	8	8.4	105	105	2.21	2.62	81	161	136	136	4.3	4.7	1.8
0	0	1	13	3	1	1	1	1	0	0	0	0	2	0	0	0	0	0	0	0	2.875	74	25.9	25.9	8.6	9.9	88	88	6.7	6.7	13	13	18	18	69	69	8.6	8.6	110	110	2.41	2.41	134	134	141	141	3.7	3.7	1.5
0	1	1	11	7	4	1	2	3	4	0	0	0	0	0	0	0	0	0	0	0	6.75	43	42.1	43.3	13.7	14	177	177	20.3	20.9	7	9	24	27	31	38	8.9	9.4	102	103	2.94	3.7	282	305	136	136	5.1	5.8	1.6
0	1	1	11	15	6	5	4	6	0	0	0	0	2	0	0	0	0	0	0	1	3.08333	23	34.1	39.1	10.4	12.4	383	442	14.8	26.8	15	16	18	19	70	114	7.2	8	99	102	6.57	12.02	78	103	133	136	5.7	5.8	3.9
0	0	1	2	15	6	5	4	0	5	0	0	0	0	0	0	0	0	0	0	0	2.25	65	37.8	29.2	10.2	7.7	159	129	16.9	12.37	9	8	26	25	19	19	9.1	8.8	112	111	0.57	0.62	150	158	146	144	3.9	4	0.9
0	0	1	10	7	5	1	1	1	1	0	0	0	0	0	0	0	0	0	0	0	1.79167	53	22.8	22.8	8.1	8.1	294	294	19.5	19.5	16	16	10	10	23	23	6.9	6.9	108	108	1.3	1.3	111	111	134	134	5.4	5.4	1.8
0	0	1	14	6	4	1	1	0	4	0	0	0	0	0	0	0	0	0	0	0	1.16667	53	21.3	21.3	7	7	134	134	11.9	11.9	14	14	14	14	48	48	7.8	7.8	118	118	3.33	3.33	100	100	146	146	4.7	4.7	2.7
0	0	1	12	8	5	1	2	5	0	0	0	0	5	0	0	0	0	0	0	1	7.95833	71	25.4	25.4	8.6	8.6	162	162	3.5	3.5	9	10	19	22	40	54	7.2	7.8	105	108	6.52	8.44	92	190	134	139	3.8	5.7	2.2
0	0	1	9	8	5	1	2	0	0	0	0	0	3	0	0	0	0	0	0	0	3.20833	72	29.8	29.8	9.9	9.9	142	142	2.8	2.8	6	6	25	25	19	19	8.4	8.4	108	108	1.18	1.18	117	117	139	139	3.7	3.7	0.3
0	0	1	13	9	5	1	3	0	2	0	0	0	0	0	0	0	0	0	0	0	1.875	61	25.2	25.2	9.1	9.4	75	75	7.8	7.8	14	14	22	22	33	33	7.8	7.8	97	97	2.7	2.7	103	103	133	133	2.4	3.3	1.2
0	0	1	7	8	4	1	3	0	3	0	0	0	0	0	0	0	0	0	0	0	2.66667	66	37.2	37.2	12.4	12.4	206	206	23.6	23.6	10	10	23	23	10	10	7.6	7.6	106	106	0.51	0.51	89	89	139	139	3.4	3.6	2.6
0	0	1	13	7	5	1	1	1	3	0	0	0	0	0	0	0	0	0	0	0	4.16667	65	34.8	34.8	9.7	9.7	177	177	24.8	24.8	8	8	22	22	38	38	7.1	7.1	123	123	1.75	1.75	290	290	153	153	3.3	3.3	1.6
0	0	4	3	15	6	5	4	2	0	0	0	0	0	0	0	0	0	0	0	0	4.79167	53	29.2	29.2	9.8	9.8	418	418	18.4	18.4	7	8	28	30	6	8	7	7.7	96	100	0.47	0.54	93	133	134	135	2.9	3.6	2.8
0	0	1	6	15	6	5	4	4	6	0	0	0	0	0	0	0	0	0	0	0	2.58333	72	36.4	36.7	11.5	11.6	214	214	4.1	4.1	9	9	20	20	21	21	6.7	6.7	124	124	1.65	1.65	180	180	153	153	4	4	1.9
0	1	1	10	14	6	4	4	2	0	0	0	0	3	0	0	0	0	0	0	1	1.66667	52	29.8	29.8	10.1	10.1	157	157	6.8	6.8	7	7	27	27	38	38	7.9	7.9	98	98	5.3	5.3	176	176	132	132	4.3	4.3	0.8
0	1	1	4	14	6	4	4	1	2	0	0	0	0	0	0	0	0	0	0	0	1.41667	91	44.1	44.1	14.2	14.2	173	173	12.6	12.6	11	11	21	21	33	33	8.4	8.4	107	107	1.36	1.36	194	194	139	139	3.7	4.4	2.2
1	1	1	6	14	6	4	4	0	1	0	0	0	0	0	0	0	0	0	0	0	1.91667	80	23.2	23.4	7.7	7.7	150	145	17.27	15.7	11	11	17	17	41	41	5.7	5.7	115	115	2.89	2.89	184	184	143	143	4.9	4.9	1.7
0	0	1	8	15	6	5	4	1	0	0	0	0	0	1	0	0	0	0	0	0	3	69	25.9	26.1	9.1	9.4	274	292	20.3	23.6	12	20	11	30	108	140	6	6.7	91	96	5.41	7.57	86	248	127	133	2.7	3.8	0.5
0	0	1	8	15	6	5	4	0	1	0	0	0	0	0	0	0	0	0	0	0	2.20833	43	32	32	10.3	10.3	151	151	7.9	7.9	10	11	13	17	44	55	7.2	7.8	109	116	3.1	3.3	105	293	136	143	5.6	6.5	2.4
0	0	1	10	14	6	4	4	3	2	0	0	0	0	0	0	0	0	0	0	0	1.41667	68	23.3	23.3	7.3	7.3	37	37	8.2	8.2	7	7	19	19	27	27	7.8	7.8	114	114	1.46	1.46	149	149	140	140	4.2	4.2	1.5
0	0	1	11	7	4	1	2	0	5	0	0	0	0	0	0	0	0	0	0	0	5.125	70	41.2	41.2	13.7	13.7	70	70	8.3	8.3	14	14	14	14	31	31	8.5	8.5	110	110	1.66	1.66	112	112	138	138	4.1	4.1	6.2
0	0	1	12	6	4	1	1	0	2	0	0	0	0	0	0	0	0	0	0	0	6.5	50	35.3	35.3	13.3	13.3	130	130	29	29	13	14	23	26	90	96	8.3	8.9	100	102	2.48	3.2	94	143	137	141	3.3	3.7	4.5
0	0	1	2	14	6	5	3	0	1	0	0	0	0	0	0	0	0	0	0	0	1.45833	52	29.8	34.2	10.1	11.4	203	198	10.6	7.9	7	20	14	23	18	22	7.4	8.1	101	113	0.58	0.85	186	496	135	141	3.6	4.1	2
1	0	1	12	10	5	2	3	0	1	0	0	0	0	0	0	0	0	0	0	0	5.95833	65	24.7	24.7	8.6	8.6	8	8	0.4	0.4	6	6	30	30	15	15	7.8	7.8	100	100	0.71	0.71	190	190	136	136	3.1	3.1	1.1
0	0	1	7	7	4	1	2	0	0	1	0	0	0	0	0	0	0	0	0	0	10	57	35.4	43.1	11.3	13.7	193	244	12.2	18.1	6	8	26	27	12	12	7.9	8.6	104	110	0.8	0.8	176	271	138	143	3.8	4	2.2
0	0	4	3	15	6	5	4	0	0	1	0	0	0	0	0	0	0	0	0	0	1.70833	54	28	28	9.5	9.5	192	192	21.9	21.9	8	8	20	20	10	10	6.8	6.8	112	112	0.65	0.65	90	90	140	140	3.9	3.9	0.9
1	0	1	9	14	6	5	3	4	2	0	0	0	0	0	0	0	0	0	0	0	6.45833	76	30.1	30.1	9.9	9.9	46	46	2.7	3.4	9	14	30	33	84	100	8.7	9.9	91	102	1.68	2.5	160	175	136	141	3	3.7	2.2
0	0	1	9	15	6	5	4	0	0	0	0	0	3	0	0	0	0	0	0	0	2.66667	56	44.9	44.9	14.4	14.4	132	132	16.1	16.1	7	7	27	27	15	15	8.5	8.5	106	106	0.71	0.71	163	163	140	140	4.6	5.1	1.3
0	0	1	15	3	1	1	1	2	0	0	0	0	4	0	0	0	0	0	0	0	13.7917	53	30.6	30.8	10.3	10.6	57	74	7.3	9.7	11	14	18	21	35	36	6.5	7.4	106	109	2.86	2.96	173	313	133	141	2.6	5.2	3.3
0	0	1	8	8	5	1	2	2	0	0	0	0	3	0	0	0	0	0	0	0	14.1667	60	31.8	32.4	10.7	11.1	177	178	6	8.2	13	19	15	15	58	69	6.9	7.7	96	107	2.26	3.14	82	145	130	135	3.4	3.8	0.9
0	0	1	2	15	6	5	4	0	1	0	0	0	0	0	0	0	0	0	0	0	1.41667	22	29.7	28	10.3	9.8	181	177	11.57	10.8	8	12	17	21	21	27	7.7	8	110	114	1.05	1.4	134	135	140	143	3.5	3.9	2.4
0	0	1	8	8	5	1	2	0	5	0	0	0	0	0	0	0	0	0	0	0	6.83333	20	37.9	37.9	12.3	12.3	109	109	10.8	10.8	8	8	23	23	8	8	7.4	7.4	108	108	0.54	0.54	128	128	139	139	4.2	4.2	1.5
0	1	1	9	13	6	4	3	1	0	0	0	0	0	1	0	0	0	0	0	1	2.91667	61	34.8	34.8	10.5	10.5	193	193	14.3	14.3	9	9	29	29	19	19	8.5	8.5	97	97	2.95	2.95	106	106	135	135	3.7	3.7	1.8
0	1	1	6	10	6	1	3	0	0	2	0	0	0	0	0	0	0	0	0	0	3.83333	73	41.9	41.9	13.5	13.5	127	127	7.1	7.1	8	8	32	32	25	25	8.3	8.3	106	106	1	1	175	175	146	146	3.5	3.5	1.3
0	1	1	12	8	5	1	2	1	0	0	0	0	2	0	0	0	0	0	0	0	14.25	73	34.7	34.7	10.5	10.5	81	81	6	6	3	3	30	30	21	21	7.2	7.2	111	111	0.93	0.93	90	90	144	144	3.4	3.4	0.9
1	1	1	13	3	1	1	1	4	0	0	0	0	2	0	0	0	0	0	0	0	1.08333	60	52	52	18.5	18.5	93	93	24	24	10	10	20	20	52	52	7	7	109	109	2.15	2.15	130	130	139	139	4.5	4.5	1.9
0	1	1	11	14	6	4	4	1	0	0	0	0	2	0	0	0	0	0	0	1	1.5	45	32.9	32.9	10.8	10.8	133	133	16.3	16.3	10	10	22	22	54	54	8.8	8.8	107	107	9.93	9.93	102	102	139	139	5.6	5.6	3.3
0	1	1	6	14	6	4	4	0	2	0	0	0	0	0	0	0	0	0	0	0	2.33333	61	29.1	29.1	9.8	9.8	361	361	22.8	22.8	10	10	16	16	33	33	8.4	8.4	109	109	1.81	1.81	82	82	135	135	4.8	4.8	1.3
0	1	1	10	15	6	5	4	3	2	0	0	0	0	0	0	0	0	0	0	0	1.625	74	38.6	39.6	12.7	12.9	94	98	22.5	27.1	10	13	23	23	38	40	7	7.5	106	107	1.47	1.78	110	151	140	142	3.9	4	1.8
1	1	1	11	3	1	1	1	12	4	0	0	0	0	0	0	0	0	0	0	0	1.04167	84	45.7	51.2	15.3	16.4	201	227	2.3	6	7	18	15	24	34	36	6.6	7.6	113	117	2.11	2.64	94	152	140	148	4.4	5	2
0	1	1	6	11	5	3	3	0	2	0	0	0	0	0	0	0	0	0	0	0	2.83333	68	41.3	41.3	14	14	187	187	32.8	32.8	8	8	23	23	14	14	8.3	8.3	108	108	1.32	1.32	90	90	139	139	3.9	3.9	1.6
0	1	1	7	15	6	5	4	0	3	0	0	0	0	0	0	0	0	0	0	0	1.33333	78	34.9	38.7	12.1	13.4	36	45	2.3	2.8	7	7	23	23	16	16	8.8	8.8	113	113	1.24	1.24	96	96	143	143	3.9	3.9	0.5
1	1	1	10	3	1	1	1	3	0	0	0	0	3	0	0	0	0	0	0	0	4.79167	49	36.7	36.7	12.5	12.5	426	426	68.2	68.2	10	11	20	21	52	59	8.7	9	102	106	1.97	2.87	190	370	133	137	5	5.3	2.4
0	1	1	9	11	2	5	4	1	5	0	0	0	0	0	0	0	0	0	0	0	2.83333	72	33.6	33.6	11.2	11.2	150	150	2.2	2.2	6	8	27	30	57	65	8	8.4	97	99	2.59	3.15	98	118	133	134	4	4.1	1.9
0	1	3	11	8	5	1	2	1	1	0	0	0	0	0	0	0	0	0	0	0	4.75	79	27.2	27.2	8.8	8.8	249	249	29.4	29.4	11	11	25	25	81	81	7.6	7.6	103	103	4.23	4.23	52	52	139	139	3.6	3.6	0.8
0	1	1	7	14	6	5	3	0	3	0	0	0	0	0	0	0	0	0	0	1	2.20833	56	19	23	6.6	8.1	266	317	15.8	17.5	11	12	21	23	49	75	7.4	7.9	109	111	3.92	4.92	159	264	141	146	3.8	4.2	1.6
0	0	1	9	11	6	2	3	1	0	0	0	0	2	0	0	0	0	0	0	0	1.66667	59	27.6	27.6	9.9	9.9	142	142	14.1	14.1	12	18	9	16	19	38	6.8	7.7	110	118	1.04	1.18	101	353	137	144	3.6	4.6	0.8
0	0	1	10	8	5	1	2	0	0	0	0	0	0	0	0	0	0	0	0	0	3	33	34.9	30.4	11.8	10.1	303	259	21.5	40.4	15	15	17	17	8	8	7	7	103	103	4.19	4.19	103	103	135	135	3.9	3.9	3.4
0	0	1	9	14	6	5	3	4	0	0	0	0	1	0	0	0	0	0	0	1	3.875	53	25.2	25.2	7.8	7.8	361	361	22.7	22.7	32	32	12	12	62	62	6.8	6.8	95	95	4.31	4.31	263	263	139	139	3.2	3.2	0.6
0	0	1	7	15	6	5	4	0	0	0	0	0	3	0	0	0	0	0	0	0	1.83333	39	26.6	26.6	9.4	9.9	63	64	5.55	6.3	7	10	22	25	12	13	7.3	7.5	106	112	0.76	0.82	100	112	138	144	3	3.4	0.7
0	1	4	11	5	3	1	1	0	0	0	0	0	2	0	0	0	0	0	0	0	3.54167	69	33.2	33.2	11.4	11.4	51	51	4.9	4.9	3	3	27	27	11	11	8	8	107	107	0.66	0.66	103	103	137	137	3.7	4.1	0.8
0	1	1	3	13	6	4	3	0	3	0	0	0	0	0	0	0	0	0	0	0	3.79167	22	39.4	39.4	13.5	13.5	280	280	12.2	12.2	8	8	25	25	12	12	8.3	8.3	108	108	0.55	0.55	150	150	141	141	3.9	3.9	1
1	0	1	9	14	6	4	4	3	0	1	0	0	0	0	0	0	0	0	0	0	1.58333	33	24.9	30.1	7.3	9.5	181	259	12.3	21.5	20	24	13	16	33	45	7.6	8.9	98	105	2.99	3.38	83	111	137	140	4	4.8	6.7
0	0	1	13	4	1	1	2	4	0	0	0	0	5	0	0	0	0	0	0	0	35.4583	40	25.4	30.4	7.6	9.8	170	227	20.6	22.4	10	20	14	30	7	20	8	8.3	105	120	0.93	2	163	224	146	154	4	4.3	8
0	0	1	2	15	6	5	4	0	5	0	0	0	0	0	0	0	0	0	0	0	1	65	35.7	35.7	11.8	11.8	386	386	14.7	14.7	8	8	24	24	27	27	8.9	8.9	106	106	0.63	0.63	115	115	138	138	3.4	3.8	0.8
0	0	1	10	9	5	1	3	1	0	0	0	0	2	0	0	0	0	0	0	0	2.45833	61	30	30	9.4	9.4	43	43	2.3	2.3	4	4	31	31	13	13	8	8	106	106	0.58	0.58	116	116	141	141	3.9	3.9	0.9
0	0	1	5	15	6	5	4	0	0	0	0	0	0	2	0	0	0	0	0	0	1.375	30	40.8	40.8	13.1	13.1	201	201	15.6	15.6	9	9	16	16	13	13	7.4	7.4	118	118	1.17	1.17	103	103	143	143	3.6	3.9	0.6
0	0	1	9	7	5	1	1	1	0	2	0	0	0	0	0	0	0	0	0	0	5.66667	40	34.8	34.8	11.7	11.7	104	104	17.6	17.6	11	11	12	12	20	20	6.9	6.9	118	118	1.53	1.53	157	157	141	141	3.6	4.2	4.8
0	1	1	12	3	1	1	1	1	1	0	0	0	0	0	0	0	0	0	0	0	8.58333	87	33.6	35	10.8	11.4	160	167	8.5	13.9	8	9	21	23	56	56	8.5	8.9	111	113	1.98	2.29	96	107	142	143	4.6	4.7	0.4
0	1	4	5	14	6	5	3	0	0	0	0	0	2	0	0	0	0	0	0	0	7.58333	22	32.4	32.4	11.4	11.4	147	147	7.8	7.8	7	7	35	35	16	16	8.3	8.3	97	97	0.31	0.31	92	92	139	139	2.8	3.7	1.6
0	1	4	11	6	4	1	1	1	0	0	0	0	2	0	0	0	0	0	0	1	13.25	71	26.9	26.9	7.5	7.5	427	427	34.8	34.8	10	12	23	29	41	46	8.5	8.6	102	103	4.69	5.17	78	109	137	142	3.3	3.5	1.6
1	1	1	6	4	1	1	2	0	0	0	0	0	0	1	0	0	0	0	0	0	16.0833	60	27.1	31.1	7.2	8.3	472	505	15	17.2	8	8	22	25	31	34	8.2	8.5	107	109	1.74	1.77	137	186	139	140	4.9	5	1.1
1	1	1	13	6	4	1	1	5	0	0	0	0	4	0	0	0	0	0	0	0	8.375	67	33.1	33.1	10.5	10.5	159	159	6.4	6.4	10	10	22	22	20	20	6.4	6.7	102	102	2.4	2.4	312	312	134	134	3.7	3.9	1.9
0	1	1	7	13	6	4	3	0	0	0	0	0	2	0	0	0	0	0	0	0	2	70	36	36	11.8	11.8	104	104	12.8	12.8	12	12	20	20	11	11	8.3	8.3	108	108	0.78	0.78	174	174	140	140	4	4	2.7
0	1	1	4	13	6	4	3	0	0	0	0	0	3	0	0	0	0	0	0	1	2.91667	66	30.7	30.7	10	10	144	144	9	9	2	2	29	29	19	19	9.9	9.9	118	118	0.92	0.92	104	104	149	149	4.5	4.5	1.5
0	1	1	10	15	6	5	4	1	1	0	0	0	0	0	0	0	0	0	0	0	1.875	70	38.8	38.8	13	13	219	219	19.5	19.5	17	17	12	12	102	102	7.6	7.6	104	104	2.58	2.58	125	125	130	135	4	4.4	1.8
0	1	4	14	8	5	1	2	2	0	0	0	0	2	0	0	0	0	0	0	0	2.70833	67	31.7	31.7	11.2	11.2	50	50	7.8	7.8	13	13	26	26	22	22	6.8	6.8	110	110	1.05	1.05	289	289	149	149	3	3.2	3.4
0	0	1	5	14	6	5	3	0	0	1	0	0	0	0	0	0	0	0	0	0	1.29167	73	26	26	8.4	8.4	134	134	12.5	12.5	7	9	23	24	53	61	8	8.6	106	111	3.1	4.05	115	117	137	143	4.4	5.7	0.8
0	0	4	10	15	6	5	4	4	2	0	0	0	0	0	0	0	0	0	0	0	2.58333	61	13.4	24	4.3	8.1	30	41	3	7.9	10	10	18	18	23	23	7.7	7.7	105	105	1.11	1.11	74	74	133	133	3.4	3.7	4.3
0	0	1	7	15	6	5	4	0	0	0	0	0	3	0	0	0	0	0	0	0	1.5	40	30.2	30.2	9.9	9.9	173	173	38.1	38.1	13.8	11	22	21	38	38	8.1	7.6	109	105	0.67	0.71	125	102	142	138	4	4	1.7
0	1	2	7	10	6	1	3	3	2	0	0	0	0	0	0	0	0	0	0	0	1.66667	79	28.7	30.7	9.4	10.3	153	166	12.5	16.6	9	9	21	21	54	54	8.3	8.3	114	114	0.97	0.97	105	105	144	144	3.6	4	1
0	0	1	9	9	5	2	2	1	0	0	0	0	0	0	0	0	0	0	0	0	2.91667	23	28.5	29.2	9.8	10	222	222	18.9	18.9	7	7	23	23	5	5	8.4	8.4	112	112	0.33	0.33	99	99	142	142	3.3	4	0.6
0	0	1	6	15	6	5	4	2	1	0	0	0	0	0	0	0	0	0	0	0	1.70833	86	22.1	23.3	6.9	7.3	127	151	11	11.5	9	9	23	23	27	27	8.6	8.6	107	107	1.23	1.23	101	101	139	139	3.6	3.6	1.3
0	0	2	14	3	1	1	1	2	0	0	0	0	1	0	0	0	0	0	0	1	22.7917	67	25.7	27.8	8.4	9.2	139	156	7.8	10.8	13	15	26	28	37	99	7.7	8.2	95	99	4.2	10.4	326	342	138	138	4.8	5.3	3.3
0	1	1	2	14	6	4	4	0	3	0	0	0	0	0	0	0	0	0	0	0	2	75	37.3	37.3	12.2	12.2	366	366	19.9	19.9	7	7	22	22	19	19	7.5	7.5	108	108	1	1	96	96	137	137	3.4	3.4	0.8
0	0	1	14	3	1	1	1	3	5	0	0	0	0	0	0	0	0	0	0	0	9.875	74	33.1	33.1	11.5	11.5	278	278	37.7	37.7	14	16	20	22	84	85	7.6	7.8	100	101	4.14	4.32	138	139	136	139	3.1	3.6	2
0	1	1	5	10	5	3	2	0	0	0	0	0	2	0	0	0	0	0	0	0	1.875	55	36.4	36.4	11.8	11.8	262	262	6.6	6.6	8	8	29	29	12	12	8.9	8.9	104	104	0.47	0.47	118	118	141	141	3.6	4	1.1
0	1	1	12	3	1	1	1	3	2	0	0	0	0	0	0	0	0	0	0	0	15	74	31.6	34.2	10.8	11.8	290	303	27.7	34.2	8	12	21	25	32	34	7.8	8	103	109	0.87	1.03	94	124	137	140	3.9	4.5	2.1
0	1	4	7	13	6	4	3	0	4	0	0	0	0	0	0	0	0	0	0	0	1	31	34.9	34.9	10.8	10.8	169	169	16.4	16.4	14	14	13	13	8	8	7.8	7.8	116	116	1.69	1.69	190	190	143	143	4.3	4.4	2.8
0	1	1	9	13	6	4	3	1	0	0	0	0	1	0	0	0	0	0	0	0	1.54167	57	33.4	33.4	11.5	11.5	20	20	6.5	6.5	8	8	26	26	28	28	7.6	7.6	104	104	0.71	0.71	124	124	138	138	4	4	2.9
0	0	1	12	15	6	5	4	1	1	0	0	0	0	0	0	0	0	0	0	0	1.45833	53	30.1	31.6	10.2	11	26	28	30.6	31.1	14	15	13	15	38	44	6.6	7.5	105	109	2.4	2.8	68	125	133	138	3.2	4.2	2
0	0	1	5	7	4	1	2	0	0	3	0	0	0	0	0	0	0	0	0	0	9.375	80	36.8	36.8	11.5	11.5	220	220	7.2	7.2	10	10	22	22	23	23	8	8	110	110	1.05	1.05	151	151	142	142	4.5	4.5	1.7
0	0	1	6	7	2	1	4	0	1	0	0	0	0	0	0	0	0	0	0	0	4.375	82	27.8	29.8	8.7	9.4	195	218	9.4	11.9	6	7	28	30	27	28	7.8	7.8	104	105	1.46	1.51	161	194	138	142	4.1	4.4	0.5
1	0	1	4	4	1	1	2	6	0	0	0	0	2	0	0	0	0	0	0	0	4.75	86	24.6	24.6	7.3	7.3	197	197	6.6	6.6	5	6	21	22	31	37	8.3	8.5	114	118	1.35	1.58	95	123	142	144	4.3	4.6	1.4
1	0	1	14	3	1	1	1	3	4	0	0	0	0	0	0	0	0	0	0	0	1.20833	77	24.3	24.3	7.4	7.4	257	257	16.3	16.3	15	32	14	18	15	26	8.3	9.4	94	101	0.44	0.8	24	578	132	144	4.4	5.4	21
0	1	3	8	5	3	1	1	0	0	0	0	0	0	0	0	0	0	0	0	1	1.66667	32	26	26	8.7	8.7	122	122	5.9	5.9	8	8	30	30	26	26	8.1	8.1	97	97	4.5	4.5	284	284	135	135	2.9	2.9	1.9
0	0	3	4	14	6	4	4	0	2	0	0	0	0	0	0	0	0	0	0	0	1.20833	91	33.8	33.8	11.4	11.4	181	181	10.3	10.3	7	7	18	18	13	13	8.5	8.5	117	117	0.99	0.99	95	95	142	142	3.9	3.9	1.4
0	1	1	13	3	1	1	1	3	0	0	0	0	3	0	0	0	0	0	0	0	10.1667	71	25.5	29	7.8	8.8	190	190	25	26.8	9	13	16	24	68	73	7.7	8.2	98	101	3.52	3.85	268	459	127	135	4.5	7.8	3.1
0	1	1	10	10	5	2	3	0	0	1	0	0	0	0	0	0	0	0	0	0	5.20833	79	25.2	25.2	8.1	8.1	238	238	6.7	6.7	12	14	16	19	40	40	8.4	8.6	111	114	5.15	5.46	67	89	143	144	3.1	3.5	1.1
0	1	1	12	15	6	5	4	3	0	0	0	0	5	0	0	0	0	0	0	1	1.91667	87	29.4	29.4	9.3	9.3	136	136	11.4	11.4	13	14	23	24	52	63	7.5	7.5	94	96	3.63	3.91	109	150	131	133	5	5.1	6
0	0	1	6	3	1	1	1	0	0	0	0	0	1	0	0	0	0	0	0	0	9.54167	61	38	38	12.1	12.1	293	293	8.7	8.7	12	12	24	24	70	70	8	8	96	96	2.57	2.57	66	66	132	132	4.2	4.2	2.6
0	0	1	8	10	2	4	4	1	2	0	0	0	0	0	0	0	0	0	0	0	1.04167	59	24.2	25.9	7.9	8.6	364	380	13.2	16	5	9	20	25	24	34	7	7.5	111	112	0.66	0.95	105	111	141	141	3.9	4.1	1.7
0	0	1	3	15	6	5	4	0	1	0	0	0	0	0	0	0	0	0	0	0	2.125	50	34.8	34.8	10.3	10.3	259	259	8.6	8.6	4	6	23	23	39	41	7.2	7.5	109	112	1.99	2.31	102	110	138	139	5.3	6.1	0.7
0	1	1	9	15	6	5	4	0	2	0	0	0	0	0	0	0	0	0	0	1	2.70833	38	27.5	27.5	8.3	8.3	71	71	15.5	15.5	13	13	21	21	36	36	7	7	107	107	6.21	6.21	81	81	141	141	3.8	3.8	1.7
0	0	1	6	3	1	1	1	0	0	0	0	0	0	1	0	0	0	0	0	0	3.91667	54	25.9	28.8	8.5	9.5	235	272	19	23.8	8	10	19	23	20	21	7.4	8.2	106	112	1.5	1.91	96	101	137	141	4	4.3	0.8
0	0	4	2	15	6	5	4	0	5	0	0	0	0	0	0	0	0	0	0	0	1	39	28	28	9.5	9.5	213	213	10.4	10.4	9	9	26	26	5	5	7.9	7.9	103	103	0.63	0.63	81	81	138	138	3.3	3.3	1.3
0	0	4	6	15	6	5	4	1	0	0	0	0	1	0	0	0	0	0	0	0	1.33333	21	33	33	11.6	11.6	157	157	26.8	26.8	9	9	17	17	10	10	6.2	6.2	118	118	0.75	0.75	69	69	144	144	3.8	3.9	1.2
0	0	1	8	15	6	5	4	0	0	0	0	0	4	0	0	0	0	0	0	0	3.75	91	27.4	36.6	9.3	12.9	204	218	19.2	19.9	9	10	18	18	46	49	7.7	7.8	116	116	2.18	2.58	117	117	143	144	3.9	4.4	0.7
0	0	4	6	13	6	4	3	1	3	0	0	0	0	0	0	0	0	0	0	0	2.45833	52	25	25	7.9	7.9	157	157	19.4	19.4	9	9	29	29	43	43	7.9	7.9	93	93	2.68	2.68	318	318	131	131	3.5	3.5	1.9
1	0	1	17	3	1	1	1	0	2	0	0	0	0	0	0	0	0	0	0	0	2.08333	70	20.4	20.4	6.5	6.5	72	72	15.7	15.7	31	34	6	8	46	58	7.4	8.7	113	121	2.48	2.65	168	220	155	158	2.2	2.8	18.1
1	0	1	7	9	5	1	3	0	0	0	0	0	4	0	0	0	0	0	0	0	2.29167	67	27.4	27.4	8.9	8.9	98	98	9.9	9.9	12	12	20	20	38	38	8.4	8.4	104	104	1.45	1.45	121	121	136	136	5.3	5.8	2.8
1	0	1	20	3	1	1	1	4	0	0	0	0	2	0	0	0	0	0	0	0	1.79167	52	16	21.9	5.9	7.7	53	118	8.4	11.9	16	29	9	19	16	40	6.4	8.4	94	106	0.99	2.9	53	143	129	141	2.7	3.2	13.6
0	0	1	8	14	6	5	3	2	2	0	0	0	0	0	0	0	0	0	0	0	2.125	57	33.8	33.8	11.2	11.2	183	183	5.5	5.5	6	6	20	20	20	20	8.4	8.4	116	116	1.19	1.19	77	77	142	142	5	5	1.5
0	0	1	7	10	6	1	3	0	0	1	0	0	0	0	0	0	0	0	0	0	2.375	62	38.1	38.1	11.8	11.8	234	234	7.5	7.5	4	4	28	28	22	22	8.2	8.2	102	102	0.76	0.76	83	83	134	134	4.1	4.1	0.8
0	0	4	9	11	5	3	3	0	2	0	0	0	0	0	0	0	0	0	0	0	2.875	82	21.1	21.9	7.1	7.3	112	108	16.7	17	12	12	18	18	90	90	7.6	7.6	101	101	3.32	3.32	87	87	131	131	5.1	5.1	2.8
0	0	1	7	14	6	5	3	0	0	0	0	0	0	0	0	0	0	0	0	0	2.58333	54	36.2	38	11.4	11.7	208	222	11.5	12	11	11	25	25	40	42	7.2	7.4	96	97	2.6	2.6	93	162	132	133	3.4	3.9	1.4
0	0	1	10	15	6	5	4	2	0	0	0	0	2	0	0	0	0	0	0	0	1.125	54	38.6	38.6	12	12	263	263	17	17	11	12	27	28	25	34	7.8	8.4	93	96	1.8	2.1	96	205	132	135	3.5	4.3	1.7
0	0	1	4	13	6	4	3	0	5	0	0	0	0	0	0	0	0	0	0	0	1.70833	54	29.3	29.3	9.6	9.6	114	114	8.6	8.6	7	7	24	24	24	24	7.5	7.5	101	101	0.6	0.6	184	184	132	132	2.6	3.9	1.5
0	0	1	6	15	6	5	4	2	0	2	0	0	0	0	0	0	0	0	0	0	1.375	50	30.3	32.5	9.8	10.5	108	127	10.7	12.9	9	13	18	21	21	22	8.1	8.2	110	112	1.2	1.4	85	136	140	143	3.6	3.7	0.9
0	0	1	4	14	6	5	3	0	0	0	0	0	2	0	0	0	0	0	0	0	1	70	31	31	10	10	152	152	11.2	11.2	7	7	23	23	12	12	7.1	7.1	112	112	1.04	1.04	85	85	142	142	4.3	4.3	3.3
1	0	1	10	3	1	1	1	0	0	0	0	0	0	1	0	0	0	0	0	0	2.79167	66	38.7	43.1	11.8	13.3	514	587	64.1	70	9	11	18	23	42	45	6.5	7.2	89	96	3.12	3.54	164	339	121	125	5.2	5.8	1.2
0	0	1	7	9	3	4	2	0	0	0	0	0	3	0	0	0	0	0	0	0	9	69	29.2	29.2	9	9	335	335	11.3	11.3	9	9	24	24	40	40	9.1	9.1	107	107	1.13	1.13	113	113	140	140	3.3	3.3	2.2
0	0	1	11	14	6	4	4	0	0	0	0	0	3	0	0	0	0	0	0	0	4.875	69	22.5	30.7	7.6	10.7	6	47	1.6	6.4	10	10	22	22	18	23	7.6	7.6	108	115	1.47	1.7	83	87	145	149	2.5	3.9	1.4
1	0	1	12	3	1	1	1	4	0	0	0	0	0	0	0	0	0	0	0	0	4.45833	54	26.6	29	8.2	8.7	22	53	20.7	23.1	8	11	23	26	66	75	7.6	7.8	124	131	0.54	0.77	75	252	157	165	3.1	4.2	1
0	0	1	8	14	6	5	3	1	0	0	0	0	1	0	0	0	0	0	0	1	1.625	55	29.9	29.9	9.8	9.8	157	157	4	4	8	8	27	27	40	40	7.4	7.4	104	104	6.21	6.21	42	42	139	139	5.1	6	3.5
0	1	1	6	8	1	3	4	0	4	0	0	0	0	0	0	0	0	0	0	0	9.75	25	27.1	27.1	9.6	9.6	98	98	20.6	20.6	10	10	21	21	32	32	8	8	104	104	0.68	0.71	86	86	135	135	3.3	3.7	1.6
1	0	1	4	8	5	1	2	0	3	0	0	0	0	0	0	0	0	0	0	0	1.125	85	36.4	36.4	11.7	11.7	397	397	38.6	38.6	3	3	28	28	37	37	9	9	110	110	1.03	1.03	103	103	141	141	4.3	4.3	0.9
0	0	1	9	15	6	5	4	1	0	3	0	0	0	0	0	0	0	0	0	0	1.45833	84	37.3	37.3	11.8	11.8	113	113	24.8	24.8	15	15	14	15	37	38	7.7	8	111	111	2.4	2.5	142	156	140	141	4.3	4.7	5.7
1	0	1	11	3	1	1	1	1	5	0	0	0	0	0	0	0	0	0	0	0	8.79167	87	34.4	34.4	11.7	11.7	163	163	14.4	14.4	12	12	21	21	20	20	8.8	8.8	105	105	0.93	0.93	148	148	138	138	3.9	3.9	1.1
1	0	1	14	7	5	1	1	2	4	0	0	0	0	0	0	0	0	0	0	0	3.04167	74	23.9	23.9	8.5	8.5	93	93	12.4	12.4	10	10	20	20	12	12	6.7	6.7	103	103	0.95	0.95	115	115	133	133	3.7	3.7	1.8
0	0	1	3	15	6	5	4	0	0	0	0	0	5	0	0	0	0	0	0	0	1.20833	60	30	30	9.5	9.5	266	266	32	32	7	7	25	25	20	20	7.7	7.7	110	110	0.88	0.88	210	210	142	142	4.2	4.2	1.7
0	1	1	6	15	6	5	4	0	0	1	0	0	0	0	0	0	0	0	0	0	1.29167	67	36	36	11.2	11.2	127	127	8	8	2	2	32	32	32	32	9	9	103	103	1.24	1.24	151	151	137	137	4	4	0.9
0	0	3	7	10	6	1	3	3	0	0	0	0	0	0	0	0	0	0	0	0	4	80	14.3	39.6	4.7	13.7	68	78	10.6	12.7	8	8	21	21	17	17	7.5	7.5	119	119	1.14	1.14	94	94	148	148	3.5	3.5	7.7
0	0	3	4	15	6	5	4	1	0	0	0	0	2	0	0	0	0	0	0	0	2.20833	80	31.6	31.6	10.1	10.1	153	153	7.6	7.6	8	8	19	19	11	11	8	8	111	111	0.76	0.76	109	109	138	138	4.4	4.4	2.8
0	1	1	4	9	5	1	3	0	0	0	0	0	3	0	0	0	0	0	0	0	3.41667	65	40.4	40.4	12.7	12.7	291	291	16.8	16.8	5	6	28	28	34	41	7.9	8.3	118	120	0.79	0.83	119	124	152	153	3.1	3.5	1.4
0	0	1	2	15	6	5	4	0	2	0	0	0	0	0	0	0	0	0	0	0	1.45833	76	18.2	24.4	6.1	8.1	195	195	8.3	8.3	7	7	20	20	14	14	7.3	7.3	109	109	1.25	1.25	101	101	136	136	4.2	4.2	1.4
1	1	1	10	4	1	1	2	0	6	0	0	0	0	0	0	0	0	0	0	0	3.375	83	26.6	26.6	7.1	7.9	430	430	19.5	19.5	8	8	28	28	38	38	7.7	7.7	111	111	0.75	0.75	115	115	147	147	3.1	4.2	4.1
0	0	4	6	15	6	5	4	2	0	0	0	0	0	0	0	0	0	0	0	0	2.20833	60	28.3	28.7	9.1	9.2	151	172	16.4	17.6	9	10	20	20	64	66	7.4	7.8	114	116	3.11	3.18	192	195	144	145	3.9	4.3	0.7
1	0	1	13	7	1	3	3	7	0	0	0	0	0	1	0	0	0	0	0	0	1.625	50	23.1	23.1	8.6	8.6	143	143	21.6	21.6	16	16	12	12	7	7	6.7	6.7	114	114	1.6	1.6	118	118	142	142	2.2	3.8	2.2
0	0	1	3	10	5	1	4	0	0	1	0	0	0	0	0	0	0	0	0	0	3.95833	72	32	32	11	11	277	277	13.4	13.4	6	6	32	32	35	35	8.6	8.6	97	97	1.1	1.1	139	139	135	135	3.6	3.6	0.88
0	0	1	5	14	6	5	3	1	2	0	0	0	0	0	0	0	0	0	0	0	2.08333	58	31.2	31.2	10.2	10.2	132	132	8	8	7	7	22	22	7	7	8.1	8.1	114	114	0.43	0.43	74	74	143	143	3	3.5	0.6
0	0	1	4	15	6	5	4	0	0	0	0	0	0	0	0	0	0	0	0	0	1.125	51	37.5	39	12.1	12.5	196	197	13.9	15.4	7	7	20	20	18	18	7.4	7.4	116	116	0.4	0.4	77	77	143	143	4.3	4.3	1.2
0	0	1	4	14	6	4	4	1	0	0	0	0	3	0	0	0	0	0	0	0	1.04167	52	28.7	29.4	9.7	9.8	341	366	9.3	10.3	6	7	20	22	2	2	6.2	7	121	121	0.5	0.51	92	122	148	149	3.2	4	1.2
1	0	1	8	10	5	2	3	2	3	0	0	0	0	0	0	0	0	0	0	0	9.04167	68	29.4	29.4	9.3	9.3	567	567	21.2	21.2	11	13	18	21	32	34	7.8	7.9	109	111	0.98	1.05	156	162	140	143	3.6	4	2.5
1	0	1	10	3	1	1	1	2	1	0	0	0	0	0	0	0	0	0	0	1	14.7083	51	31.2	35	11.1	11.9	66	68	12.6	13.5	18	22	10	20	103	141	7.2	7.9	100	101	3.89	5.11	189	223	132	139	4.7	6.1	1.5
0	0	4	3	14	5	5	4	0	3	0	0	0	0	0	0	0	0	0	0	0	2.41667	51	29.2	29.2	10	10	325	325	18.8	18.8	10	22	4	15	66	72	7.7	8.3	103	116	1.18	1.29	320	812	129	140	2.4	3.1	1
0	0	4	7	14	6	4	4	1	0	0	0	0	3	0	0	0	0	0	0	0	2	51	30.2	30.2	9.1	9.1	422	422	35.9	35.9	12	24	3	12	46	50	6.7	7.3	105	114	1.25	1.53	216	878	131	138	4	4.5	1
0	0	1	4	15	6	5	4	0	3	0	0	0	0	0	0	0	0	0	0	0	3.79167	68	27	27	9	9	108	108	8.1	8.1	8	8	22	22	7	7	7.7	7.7	115	115	0.63	0.63	106	106	145	145	3.9	3.9	1.8
0	0	1	6	13	6	4	3	0	2	0	0	0	0	0	0	0	0	0	0	0	1.25	87	28.1	28.1	9.5	9.5	153	153	7.8	7.8	8	8	24	24	10	10	7.9	7.9	100	100	0.58	0.58	94	94	132	132	3.4	3.4	1
1	0	4	15	6	4	1	1	2	2	0	0	0	0	0	0	0	0	0	0	0	20.2083	50	19.2	22.9	6.1	7.9	57	57	11.7	13	17	25	13	20	38	46	8.6	8.7	95	98	2.16	2.37	92	135	133	135	3.2	3.6	5
0	0	4	6	15	6	5	4	0	1	0	0	0	0	0	0	0	0	0	0	0	2.625	55	27.8	30.2	8.2	9.2	255	283	6.9	7.6	4	5	24	26	14	17	6.9	7.3	109	111	0.77	0.78	93	98	139	140	3.3	4.5	1
0	0	3	11	14	6	4	4	1	2	0	0	0	0	0	0	0	0	0	0	1	5.08333	69	26.8	29.4	8	8.9	149	160	9.1	12.9	10	11	25	27	20	29	8.6	9	103	104	2.85	3.49	97	182	140	141	3.1	4	1.4
0	0	4	9	10	6	1	3	0	4	0	0	0	0	0	0	0	0	0	0	1	4.625	73	30.1	30.1	10.3	10.3	348	348	21.2	21.2	10	11	21	22	57	59	8	8.1	96	97	6.01	6.1	238	260	128	129	5.1	5.6	1.4
0	0	1	8	13	5	4	4	0	2	0	0	0	0	0	0	0	0	0	0	1	9.875	24	26.9	30.3	7.7	9	223	248	24.5	30.7	12	13	22	24	23	32	8.1	8.6	107	107	2.12	2.46	106	144	142	143	4.4	4.6	5.7
0	0	3	9	3	1	1	1	0	0	1	0	0	0	0	0	0	0	0	0	0	7.08333	23	29.4	29.4	10	10	290	290	14	14	14	14	17	17	65	65	8.1	8.1	111	111	4.5	4.5	125	125	142	142	5.3	5.3	1.6
0	0	1	9	15	6	5	4	0	3	0	0	0	0	0	0	0	0	0	0	1	1.33333	24	31.7	33.4	10.2	10.2	278	283	17.8	21	9	22	18	30	13	35	7.7	8.4	101	104	1.97	3.73	68	168	139	142	3.4	5.1	6.8
0	0	1	9	14	6	5	3	2	0	0	0	0	3	0	0	0	0	0	0	1	1.5	24	32.6	32.6	10	10	238	238	12.8	12.8	10	10	24	24	28	28	8.2	8.2	107	107	2.77	2.77	69	69	141	141	3.8	3.8	0.5
1	0	1	5	14	6	5	3	0	0	0	0	0	1	0	0	0	0	0	0	1	1.29167	51	28.6	28.6	9.8	9.8	174	174	37.8	37.8	19	19	20	20	57	57	7.6	7.6	83	83	10.48	10.48	121	121	122	125	4.1	4.1	5.3
0	1	1	7	14	6	5	3	2	2	0	0	0	0	0	0	0	0	0	0	0	2.95833	59	22.9	28	6.9	8.6	134	155	8.2	11.9	9	11	17	19	40	43	6.4	6.8	109	111	1.75	1.89	139	154	137	139	4.1	4.5	1.2
1	0	1	12	3	1	1	1	0	5	0	0	0	0	0	0	0	0	0	0	0	7.33333	60	23.2	23.2	7.2	7.2	68	68	6.3	6.3	11	11	24	24	36	36	9.7	9.7	107	107	1.45	1.45	101	101	142	142	3.3	3.3	2.6
1	0	4	21	3	1	1	1	9	0	0	0	0	3	0	0	0	0	0	0	0	3.83333	44	22.3	28.8	8.1	10.8	80	80	23.6	23.6	18	24	10	15	76	80	5.9	6.6	100	102	8.1	8.3	89	141	134	135	4.2	4.5	3.9
1	1	1	15	6	1	1	4	2	0	0	0	0	4	0	0	0	0	0	0	0	1.54167	65	25.1	26.3	8.6	9	164	164	17.6	17.6	16	16	15	15	50	50	8.4	8.4	109	109	2.45	2.45	79	79	140	140	4.6	4.6	5
0	0	1	2	14	6	4	4	0	2	0	0	0	0	0	0	0	0	0	0	0	1.08333	63	30.4	34	9.5	10.8	354	354	19.7	19.7	8	8	23	23	24	24	8.2	8.2	111	111	1.18	1.18	136	136	142	142	4.2	4.2	3.7
0	0	1	3	14	6	5	3	1	4	0	0	0	0	0	0	0	0	0	0	0	1.75	56	26	28.3	9	9.7	276	280	24.8	25.6	6	7	26	26	16	17	5.9	6.1	110	110	0.44	0.52	96	102	141	142	3.9	4	0.9
1	0	1	10	3	1	1	1	4	0	0	0	0	2	0	0	0	0	0	0	0	6.04167	78	36.1	36.3	10.9	11.2	143	173	4	5.9	7	14	23	34	31	32	7.6	7.8	107	111	1.09	1.13	69	85	148	148	3.9	4.6	2.5
0	0	1	5	13	6	4	3	2	4	0	0	0	0	0	0	0	0	0	0	0	3.33333	82	38.1	36.8	11.9	11.6	358	350	7.8	5.9	10	7	35	33	31	32	8.8	8.4	101	104	1.33	1.43	204	230	143	142	4.1	4.1	1.2
0	0	4	8	15	6	5	4	4	0	0	0	0	0	2	0	0	0	0	0	0	4.875	32	40.5	40.5	12.6	12.6	234	234	98.3	98.3	12	12	19	19	16	16	7.1	7.1	114	114	0.91	0.91	81	81	145	145	3.4	3.4	2.8
0	0	1	8	8	5	1	2	2	0	0	0	0	4	0	0	0	0	0	0	0	10.9167	79	31.4	31.4	10.2	10.2	245	245	13.3	13.3	7	7	24	24	19	19	8.4	8.4	106	106	0.58	0.58	119	119	137	137	3.7	4.2	1.5
0	1	4	9	15	6	5	4	0	0	0	0	0	4	0	0	0	0	0	0	1	2.83333	69	31.2	34.7	10.7	11.6	108	108	9.4	9.4	10	10	30	30	71	71	9.6	9.6	96	96	5.38	5.38	84	84	136	136	6.1	6.1	0.9
0	1	4	5	15	6	5	4	0	0	0	0	0	0	0	0	0	0	0	0	0	2.125	68	23.2	28.3	7.4	9.2	61	79	2.6	3.4	5	7	24	26	13	15	8.3	8.8	107	112	1.15	1.23	90	102	138	143	4.3	4.6	0.6
0	1	1	3	7	4	1	2	0	3	0	0	0	0	0	0	0	0	0	0	0	1.625	84	35.7	36.1	12.4	12.7	310	352	21.7	25.7	6	9	28	31	34	36	8.1	8.3	98	99	1.27	1.31	46	107	135	136	3.8	4	1.7
1	1	1	17	3	1	1	1	4	3	0	0	0	0	0	0	0	0	0	0	1	1	66	28.9	28.9	9.7	9.7	115	115	26.8	26.8	11	17	21	27	68	80	8.6	9.1	103	104	3.03	3.86	166	256	140	141	4.6	5.8	7.3
0	1	4	9	15	6	5	4	3	3	0	0	0	0	0	0	0	0	0	0	0	3.58333	53	29.8	29.8	10.2	10.2	80	80	2.1	2.1	13	13	18	18	15	15	7.3	7.3	108	108	0.75	0.75	109	109	139	139	3.4	3.5	3.6
0	0	4	5	15	6	5	4	0	0	1	0	0	0	0	0	0	0	0	0	0	1.16667	75	32	32	10.6	10.6	106	106	8.8	8.8	6	6	21	21	17	17	8.1	8.1	100	100	0.7	0.7	101	101	127	127	4.4	4.4	2
1	0	1	12	3	1	1	1	0	0	0	0	0	0	2	0	0	0	0	0	0	1.41667	76	25	25	7.4	7.4	141	141	25.2	25.2	13	13	22	22	103	103	8.2	8.7	106	107	1.54	1.69	162	176	141	142	3.7	4.1	1.6
0	0	3	6	13	6	4	3	0	3	0	0	0	0	0	0	0	0	0	0	0	1.625	67	27.4	27.4	9.4	9.4	67	67	15.3	15.3	9	9	21	21	22	22	7.5	7.5	108	108	0.97	0.97	74	74	138	138	3.5	4.1	2.4
1	0	1	15	3	1	1	1	2	0	0	0	0	1	0	0	0	0	0	0	0	16.625	58	19.4	23.5	6.5	7.9	34	38	4.3	4.5	7	7	25	25	27	27	8	8	106	106	1.12	1.12	133	133	138	138	3.7	3.7	1.7
0	0	1	8	15	6	5	4	1	0	0	0	0	1	0	0	0	0	0	0	0	1.58333	62	21.9	23.8	7.6	8.1	202	202	26.3	26.3	7	11	20	24	10	10	7.1	7.9	106	109	0.54	0.55	132	469	137	140	2.8	3.4	0.9
0	0	1	6	9	5	1	3	0	0	0	0	0	1	0	0	0	0	0	0	0	1.91667	60	38.1	38.1	12.2	12.2	343	343	13.4	13.4	10	10	25	25	8	8	7.8	7.8	105	105	0.5	0.5	88	88	140	140	3.7	3.7	2.1
0	1	1	4	14	5	5	4	0	0	0	0	0	1	0	0	0	0	0	0	0	1.45833	30	22.6	22.6	7.4	7.4	454	454	7.3	7.3	8	8	26	26	4	4	7.4	7.4	108	108	0.36	0.36	90	90	142	142	3.2	3.9	0.5
0	0	2	10	14	6	5	3	2	0	1	0	0	0	0	0	0	0	0	0	0	1.41667	64	34.1	34.1	10.4	10.4	103	103	22.1	22.1	12	12	25	25	86	86	8.4	8.4	109	109	3.65	3.65	148	148	146	146	4.4	4.4	1.4
1	0	1	13	3	1	1	1	7	0	0	0	0	0	4	0	0	0	0	0	1	6.41667	71	23	23	7.1	7.1	280	280	31.8	31.8	11	11	26	26	63	63	6.7	6.7	106	106	2.89	2.89	198	198	143	143	3.6	4.1	1.8
0	0	1	11	6	4	1	1	2	0	0	0	0	4	0	0	0	0	0	0	0	5.125	65	31.5	31.5	10.4	10.4	457	457	28	28	13	13	20	20	13	13	8.8	8.8	109	109	0.81	0.81	154	154	142	142	3.3	3.5	1.4
0	0	1	7	13	6	4	3	0	0	1	0	0	0	0	0	0	0	0	0	0	1.58333	79	40.8	40.8	13.8	13.8	304	304	6.7	6.7	10	10	24	24	8	8	9	9	107	107	0.73	0.73	80	80	141	141	3.4	3.4	1.4
0	0	1	4	14	6	4	4	1	2	0	0	0	0	0	0	0	0	0	0	0	3.04167	72	33.6	33.6	10.7	10.7	262	262	9.6	9.6	11	11	27	27	56	56	8.9	8.9	102	102	1.4	1.4	176	176	140	140	3	3.8	0.6
0	0	1	10	8	5	1	2	1	0	0	0	0	0	1	0	0	0	0	0	0	14.7917	48	23.9	23.9	7.1	7.1	505	505	12.6	12.6	9	9	21	21	20	20	8.4	8.4	112	112	0.53	0.53	103	103	142	142	3.3	3.8	0.5
0	0	4	12	7	5	1	1	3	2	0	0	0	0	0	0	0	0	0	0	0	3.41667	73	34.6	34.6	10.9	10.9	378	378	16.5	16.5	16	16	17	17	43	43	7.5	7.5	107	107	1.95	1.95	208	208	140	140	4.5	4.5	1.9
0	0	1	2	15	6	5	4	0	4	0	0	0	0	0	0	0	0	0	0	0	2.20833	85	27.6	29.5	8.6	9.3	338	338	23.9	23.9	10	10	23	23	15	15	6.7	6.7	109	109	0.48	0.48	87	87	142	142	2.6	2.6	1.2
0	0	1	7	12	4	4	4	0	2	0	0	0	0	0	0	0	0	0	0	0	2.125	85	30.4	31.9	9.9	10.2	400	415	41.8	43.9	10	12	23	24	70	73	8.1	8.3	99	100	1.27	1.39	123	218	133	135	4.4	4.7	2.5
0	0	4	11	8	4	1	3	2	1	0	0	0	0	0	0	0	0	0	0	1	2.25	68	38.4	38.4	12.5	12.5	164	164	23	23	12	16	12	20	28	30	7.4	7.8	108	112	2.06	2.23	86	184	137	140	3	4.4	2.6
0	0	1	5	15	6	5	4	0	0	0	0	0	2	0	0	0	0	0	0	0	8.45833	42	31.2	31.2	10	10	280	280	12.9	12.9	8	8	19	19	7	7	7.2	7.2	113	113	0.36	0.36	75	75	140	140	3.5	3.5	1
0	0	1	12	8	5	1	2	1	3	0	0	0	0	0	0	0	0	0	0	0	2.79167	61	31	31	10.1	10.1	209	209	14.6	14.6	10	10	25	25	34	34	7.4	7.4	97	97	1.3	1.3	229	229	132	132	3.5	3.7	2.3
0	0	1	6	13	5	4	4	0	0	0	0	0	3	0	0	0	0	0	0	0	4.54167	78	21.8	21.8	7.8	7.8	36	36	0.4	0.4	4	7	23	26	16	19	7.4	7.6	92	96	1	1.1	103	162	122	125	3.2	4.9	0.4
0	0	1	8	14	6	5	3	1	0	0	0	0	0	0	0	0	0	0	0	0	2.45833	78	23.4	23.4	7.6	7.6	219	219	5.7	5.7	9	11	21	26	80	90	8.4	9	102	104	4.16	4.26	113	173	134	139	4.4	5.8	1.2
1	0	3	3	14	6	5	3	2	0	0	0	0	0	1	0	0	0	0	0	0	2	76	32.6	32.6	10.6	10.6	161	161	27.3	27.3	9	9	17	17	14	14	6.8	6.8	114	114	0.82	0.82	125	125	140	140	3.5	3.9	1.4
1	0	1	19	3	1	1	1	5	3	0	0	0	0	0	0	0	0	0	0	1	5	69	27.9	29.1	9.1	9.6	27	36	13.4	15.1	10	10	23	24	19	21	7.7	7.9	104	105	2.61	2.9	78	91	138	138	3	3.7	3
0	0	4	6	15	6	5	4	2	0	0	0	0	0	1	0	0	0	0	0	0	3.33333	91	38.9	38.9	13.4	13.4	349	349	34.7	34.7	11	11	22	22	10	10	8.2	8.2	106	106	0.44	0.44	78	78	139	139	3.5	4.4	1.7
0	0	4	4	14	6	4	4	0	1	0	0	0	0	0	0	0	0	0	0	0	1.625	91	36.1	36.1	12	12	122	122	18.4	18.4	8	8	22	22	21	21	8.7	8.7	111	111	0.84	0.84	92	92	141	141	4.2	4.2	3.1
0	0	1	10	10	4	2	4	0	0	0	0	0	4	0	0	0	0	0	0	0	1.875	64	22.8	22.8	7.2	7.2	131	131	9.2	9.2	13	13	27	27	24	24	7.3	7.3	104	104	0.82	0.82	192	192	144	144	3	3.9	7.5
0	0	1	7	14	6	4	4	0	3	0	0	0	0	0	0	0	0	0	0	0	1.45833	73	38.2	38.2	12	12	244	244	4.9	4.9	6	6	36	36	20	20	7.6	7.6	104	104	0.41	0.41	96	96	146	146	3.6	3.6	0.6
0	1	1	9	4	2	1	1	0	0	0	0	0	0	0	0	0	0	0	0	1	3.79167	52	26.9	26.9	8.4	8.4	383	383	7.2	7.2	9	9	20	20	16	16	8	8	108	108	0.82	0.82	128	128	137	137	4.2	4.2	1.7
0	0	1	7	15	6	5	4	1	3	0	0	0	0	0	0	0	0	0	0	0	1.58333	63	31.1	34.5	10.2	11.5	190	225	6.4	10.4	9	9	23	23	13	13	8.8	8.8	109	109	0.64	0.64	183	183	141	141	4.3	4.5	0.9
0	0	4	6	15	6	5	4	1	2	0	0	0	0	0	0	0	0	0	0	0	1.70833	91	27.7	27.7	9.5	9.5	203	203	21.3	21.3	8	8	32	32	22	22	7.3	7.3	90	90	0.85	0.85	102	102	130	130	3.7	3.7	1.5
1	0	1	5	14	6	4	4	0	0	0	0	0	2	0	0	0	0	0	0	0	1.08333	85	21.4	22.5	7.4	7.7	25	29	8.5	9.5	8	9	24	26	28	30	7.4	7.7	98	103	0.75	0.81	200	233	133	135	4	4	2.1
1	0	1	12	9	3	4	2	4	0	0	0	0	0	3	0	0	0	0	0	0	1.20833	59	20.1	20.1	6.9	6.9	24	24	6	6	11	11	15	17	58	63	6.7	6.8	105	106	1.65	1.81	140	199	132	133	3.7	3.7	2
0	0	4	10	12	5	4	3	2	3	0	0	0	0	0	0	0	0	0	0	1	1.41667	53	36.1	36.1	11.2	11.2	117	117	11.6	11.6	11	11	25	25	46	46	8.2	8.2	101	101	4.55	4.55	201	201	137	137	4	4	1.5
0	0	1	9	9	5	2	2	1	2	0	0	0	0	0	0	0	0	0	0	1	1.91667	54	33.5	33.5	10.3	10.3	99	99	9.4	9.4	11	11	27	27	45	45	8.3	8.3	102	102	5.48	5.48	159	159	140	140	3.7	3.7	1.1
0	0	1	13	3	1	1	1	2	0	0	0	0	0	0	0	0	0	0	0	0	6.66667	91	36.2	36.2	11.8	11.8	224	224	13.8	13.8	9	9	21	21	63	63	8.3	8.3	110	110	2.61	2.61	162	162	140	140	4	4	1.4
1	0	1	12	5	1	1	3	1	0	0	0	0	3	0	0	0	0	0	0	0	7.70833	81	27.3	32.5	8.8	10.5	122	139	40.3	45.3	16	16	15	18	35	47	6.9	7.2	109	109	2.07	2.88	164	194	140	143	4.7	5.1	7
0	0	1	11	7	5	1	1	0	2	0	0	0	0	0	0	0	0	0	0	0	8.375	55	28.7	28.7	8.9	8.9	355	355	26.2	26.2	13	18	12	17	58	65	7.6	8.8	111	116	2.28	2.67	104	117	141	146	3.6	3.9	1.2
1	0	1	15	8	5	1	2	2	0	0	0	0	2	0	0	0	0	0	0	1	1.70833	84	30.1	30.1	10	10	16	16	23.7	23.7	16	16	18	18	61	61	8.3	8.3	107	107	3	3	123	123	141	141	5.8	5.8	1.86
0	0	1	8	14	6	4	4	5	2	0	0	0	0	0	0	0	0	0	0	0	4.16667	78	32	32	10.6	10.6	155	155	4.8	4.8	7	7	26	26	32	32	8.7	8.7	108	108	5.23	5.23	125	125	141	141	4.6	4.6	1.7
0	0	1	10	12	6	2	4	2	3	0	0	0	0	0	0	0	0	0	0	1	3.75	78	30.2	31.9	9.7	10.4	52	92	3.3	9.5	7	7	23	25	24	32	7.8	8.3	106	108	4.65	4.74	87	108	138	138	3.9	3.9	0.5
0	0	1	10	3	1	1	1	0	4	0	0	0	0	0	0	0	0	0	0	0	2.04167	79	29.3	29.3	9.8	9.8	138	138	8.1	8.1	12	12	23	23	5	5	9.1	9.1	108	108	1	1	116	116	143	143	3.4	3.7	1
0	0	1	6	15	6	5	4	2	0	0	0	0	3	0	0	0	0	0	0	0	1.625	81	39.9	39.9	13.5	13.5	148	148	14.8	14.8	11	11	18	18	18	18	6.9	6.9	113	113	0.83	0.83	212	212	142	142	4	4	1
0	0	1	9	8	5	1	2	4	3	0	0	0	0	0	0	0	0	0	0	0	4.41667	78	27.3	30.5	9.1	10	146	181	18.7	20.4	6	7	21	23	24	24	7	7.2	107	109	0.4	0.54	124	235	135	138	3.8	4.1	0.9
0	0	1	6	12	6	3	3	0	0	0	0	0	4	0	0	0	0	0	0	0	1.45833	70	32.1	32.1	9.8	9.8	191	191	27.7	27.7	11	11	25	25	36	36	7.8	7.8	108	108	1.27	1.27	196	196	144	144	3.4	3.9	1.8
0	1	1	6	13	6	4	3	1	2	0	0	0	0	0	0	0	0	0	0	0	1.58333	68	24.1	25	7.9	8.2	142	160	10.8	11.3	9	12	24	28	53	68	8.7	8.8	90	94	0.85	0.91	127	143	127	130	4.5	4.7	0.6
0	1	3	6	7	4	1	2	0	0	0	0	0	1	0	0	0	0	0	0	0	15.625	21	34	34	12.1	12.1	228	228	9.7	9.7	6	6	26	26	6	6	8.9	8.9	108	108	0.8	0.8	80	80	140	140	3.5	3.5	1
0	0	1	12	3	1	1	1	2	0	0	0	0	4	0	0	0	0	0	0	0	4.20833	84	31.8	31.8	10.1	10.1	255	255	19.9	19.9	16	16	19	19	14	14	6.8	6.8	102	102	0.75	0.75	351	351	137	137	2.8	4	1.5
0	0	1	11	13	6	4	3	5	2	0	0	0	0	0	0	0	0	0	0	1	3.5	73	28.5	29.2	8.9	9.1	148	149	20.2	21.9	9	12	21	22	28	38	7.7	8.3	104	109	5.5	6.9	114	193	138	139	5.3	5.3	2.1
0	0	4	8	9	5	2	2	0	2	0	0	0	0	0	0	0	0	0	0	0	2.25	46	21.9	21.9	6.7	6.7	145	145	21	21	15	15	16	16	16	16	7.1	7.1	106	106	2.88	2.88	131	131	137	137	3.9	3.9	1.3
0	0	1	9	8	5	1	2	4	2	0	0	0	0	0	0	0	0	0	0	0	3.66667	75	34.6	34.6	11.1	11.1	178	178	21.5	21.5	10	10	23	24	24	25	8	8.4	103	106	0.99	1.2	65	77	136	140	3.7	3.9	1.5
0	0	1	8	13	6	4	3	2	0	0	0	0	2	0	0	0	0	0	0	0	5.04167	91	30.8	30.8	10.2	10.2	259	259	6.7	6.7	10	10	19	19	23	23	9.1	9.1	112	112	1.11	1.11	135	135	141	141	4	4	2.8
0	1	1	11	7	5	1	1	0	0	0	0	0	2	0	0	0	0	0	0	0	7.75	52	30.7	30.7	10.4	10.4	48	48	10.8	10.8	5	5	31	34	9	12	8.2	8.9	101	102	0.52	0.62	95	112	138	140	3.9	4.1	1.6
0	1	1	3	14	6	5	3	0	2	0	0	0	0	0	0	0	0	0	0	0	2.79167	62	32.1	32.1	9.4	9.4	273	273	18.5	18.5	9	9	24	24	24	24	8.5	8.5	106	106	1.16	1.16	227	227	139	139	4.6	4.6	2
0	1	1	10	3	1	1	1	2	2	0	0	0	0	0	0	0	0	0	0	0	10.0833	62	32.9	32.9	9.5	9.5	374	374	20.8	20.8	13	13	19	19	25	32	7.9	8.4	102	108	2.05	2.42	267	325	138	140	4.4	5.1	2.9
0	1	1	8	13	6	4	3	1	0	0	0	0	0	0	0	0	0	0	0	1	9.70833	55	25	25	8.2	8.2	75	75	5.9	5.9	7	7	26	26	28	28	8.2	8.2	103	103	2.38	2.38	169	169	136	136	4.1	4.1	1.9
0	1	1	2	14	5	5	4	0	2	0	0	0	0	0	0	0	0	0	0	0	1.83333	33	40.1	40.1	13.4	13.4	193	193	7.8	7.8	5	5	27	27	10	10	8.1	8.1	107	107	0.86	0.86	95	95	139	139	4.2	4.4	1.7
0	1	1	5	14	5	5	4	0	3	0	0	0	0	0	0	0	0	0	0	0	1.83333	59	30.1	30.1	9.9	9.9	305	305	13	13	8	9	21	23	24	24	8.4	8.7	104	105	1.49	1.59	166	169	135	135	3.9	4.2	0.8
0	1	1	5	15	6	5	4	0	3	0	0	0	0	0	0	0	0	0	0	0	1.79167	38	39.2	39.2	13.4	13.4	299	299	7.4	7.4	8	8	22	22	4	4	7.8	7.8	108	108	0.86	0.86	137	137	138	138	4	4	1.6
0	0	1	11	13	6	4	3	3	0	1	0	0	0	0	0	0	0	0	0	0	1.5	81	26.4	27.9	7.8	8.2	49	49	4.6	7.1	9	11	21	25	37	38	8	8.1	115	116	2.53	2.57	120	180	148	149	4.2	4.5	2.6
1	1	1	4	8	4	2	2	0	0	0	0	0	0	1	0	0	0	0	0	0	1.75	64	31.7	31.7	10.7	10.7	158	158	21.3	21.3	11	14	15	17	34	36	7.1	7.3	98	99	2	2.1	95	100	126	128	3.9	4	2.5
0	1	1	14	15	6	5	4	1	1	0	0	0	0	0	0	0	0	0	0	0	4.75	77	24.1	27	7.7	8.6	59	75	17.3	21.4	11	11	17	17	91	91	8	8	111	111	5.2	5.2	120	120	139	139	5.4	5.4	2.8
0	0	4	10	15	6	5	4	0	0	0	0	0	0	0	0	0	0	0	0	1	1.16667	54	31.5	32.5	10.6	11	145	181	12.5	20.4	17	21	18	25	38	51	8.2	8.4	91	94	6.7	8.9	78	120	130	136	4.4	6.9	1.2
0	0	1	9	14	6	5	3	1	0	0	0	0	0	4	0	0	0	0	0	0	2.375	76	31.4	32.1	10.2	10.3	228	249	27.5	30.5	6	6	26	26	35	35	7.9	7.9	102	102	1.5	1.5	121	121	134	134	4.1	4.1	1.4
1	0	1	18	3	1	1	1	7	4	0	0	0	0	0	0	0	0	0	0	0	1.16667	79	18.3	20	6	6.2	14	46	2.5	4	25	30	4	8	36	39	7	7.6	96	98	1.89	2.05	144	203	128	131	4.4	5.5	14.4
0	0	1	5	10	6	1	3	0	0	0	0	0	0	1	0	0	0	0	0	0	3.08333	74	23.1	23.1	7.7	7.7	336	336	7	7	11	11	21	21	29	29	8	8	109	109	1.15	1.15	138	138	141	141	3.6	3.6	1.4
1	0	3	10	3	1	1	1	1	0	0	0	0	0	2	0	0	0	0	0	0	9.79167	69	31.1	31.1	9.4	9.4	349	349	12.8	12.8	9	9	22	22	25	25	7.4	7.4	107	107	0.99	0.99	97	97	138	138	4.3	4.3	1.5
0	0	1	6	14	6	4	4	1	3	0	0	0	0	0	0	0	0	0	0	0	3.29167	87	32.6	32.6	10.7	10.7	243	243	15	15	9	9	22	22	22	22	7.7	7.7	99	99	1.41	1.41	115	115	130	130	3.7	4.2	0.5
0	0	1	2	15	6	5	4	0	0	0	0	0	0	0	0	0	0	0	0	0	1.08333	54	29.7	30.3	9.7	9.8	349	349	6.6	6.6	5	5	25	25	4	4	7.8	7.8	113	113	0.33	0.33	96	96	143	143	4.3	4.3	1
0	0	1	13	8	5	1	2	2	0	2	0	0	0	0	0	0	0	0	0	0	10.5833	80	33.2	33.2	10.5	10.5	94	94	3.4	3.4	3	3	30	30	56	56	7.4	7.4	114	114	1.11	1.11	99	99	147	147	4.1	4.1	1
0	0	3	12	9	5	1	3	1	2	0	0	0	0	0	0	0	0	0	0	1	1.125	70	26	29.4	8.8	9.4	183	183	18	18	13	13	24	24	53	53	9.1	9.1	102	102	4.13	4.13	254	285	139	141	4.2	4.6	1.1
0	0	1	11	15	6	5	4	2	0	0	0	0	2	0	0	0	0	0	0	0	2.41667	70	26.7	26.7	9.1	9.1	15	15	0.4	0.4	10	10	21	21	16	16	7.2	7.2	111	111	0.51	0.51	151	151	142	142	3.5	3.6	2
0	1	3	13	11	6	1	4	2	0	0	1	0	0	0	0	0	0	0	0	0	4.625	70	32.6	32.6	10.8	10.8	112	112	10.9	10.9	7	12	24	27	24	28	7.8	7.9	95	102	1.15	1.26	159	196	131	136	3.4	3.9	1.7
0	1	1	10	3	1	1	1	0	0	0	0	0	2	0	0	0	0	0	0	0	10.125	51	30.6	30.6	10.1	10.1	40	40	15.3	15.3	8	8	21	21	9	9	7.1	7.1	112	112	0.67	0.67	113	113	141	141	4	4	2.4
0	1	1	7	15	6	5	4	1	0	0	0	0	0	0	0	0	0	0	0	0	1.70833	81	39.5	39.5	13.1	13.1	207	207	29.5	29.5	11	11	20	20	16	16	7.6	7.6	102	102	1.37	1.37	134	134	133	133	3.7	5.1	1.9
0	1	1	5	14	6	5	3	1	0	0	0	0	3	0	0	0	0	0	0	0	2.5	60	25.5	25.5	8	8	137	137	10.2	10.2	5	5	27	27	12	12	7.7	7.7	106	106	0.46	0.46	307	307	138	138	3.4	3.8	1.5
0	0	1	4	9	5	2	2	0	1	0	0	0	0	0	0	0	0	0	0	0	1.20833	89	36.1	36.1	11.7	11.7	130	130	20.1	20.1	12	12	22	22	84	84	9.2	9.2	119	119	1.8	1.8	138	138	153	153	3.8	3.8	1.9
0	1	1	8	8	5	1	2	0	0	0	0	0	0	1	0	0	0	0	0	0	8.66667	85	27	33.1	9.2	11.7	334	334	6.9	6.9	12	12	21	21	38	38	7.8	7.8	113	113	1.78	1.78	128	128	142	146	3.5	4.4	0.8
0	0	4	12	13	6	4	3	0	0	1	0	0	0	0	0	0	0	0	0	0	7.08333	40	29.8	29.9	11.1	11.2	48	58	33.7	33.7	16	16	11	13	80	82	8	8.2	102	106	3.81	4.12	75	86	131	133	3.4	3.6	1.8
0	0	1	6	15	6	5	4	0	2	0	0	0	0	0	0	0	0	0	0	0	1.25	75	37	37	11.5	11.5	150	150	21.6	21.6	14	14	29	29	81	81	7.4	7.4	95	95	1.4	1.4	79	79	138	138	3.4	3.4	1.76
0	0	1	8	8	5	1	2	0	2	0	0	0	0	0	0	0	0	0	0	0	3.75	62	29.9	29.9	10.1	10.1	118	118	9.5	9.5	8	9	19	19	20	22	8.6	8.8	101	112	0.8	1.03	151	257	129	139	3.8	4.1	0.9
1	0	1	12	3	1	1	1	2	6	0	0	0	0	0	0	0	0	0	0	0	9.08333	71	22.9	36.1	7.1	11.3	68	129	5.2	7.1	12	13	16	21	30	36	6.6	7.1	110	111	1.22	1.69	155	229	138	145	4.9	6.1	3.3
0	0	1	2	15	6	5	4	0	3	0	0	0	0	0	0	0	0	0	0	0	1.29167	69	27.5	27.5	9.1	9.1	335	335	11	11	7	7	21	21	26	26	8.3	8.3	112	112	0.9	0.9	109	109	140	140	4.8	4.8	0.7
1	0	1	8	8	5	1	2	0	3	0	0	0	0	0	0	0	0	0	0	0	2.79167	57	27	27	8.6	8.6	71	71	18.9	18.9	8	8	27	27	39	39	8.5	8.5	100	100	0.81	0.81	69	69	135	135	4.7	4.7	1.9
0	0	1	12	7	5	1	1	4	0	0	0	0	0	0	0	0	0	0	0	0	2.54167	56	30.5	30.5	10	10	64	64	16	16	4	4	28	28	33	33	8	8	110	110	0.83	0.83	86	95	142	142	3.8	3.8	1.5
0	0	1	11	14	6	5	3	5	5	0	0	0	0	0	0	0	0	0	0	0	5.08333	87	38.8	40	12.5	13.1	311	348	15.5	16.2	10	12	20	20	47	50	8.2	8.8	104	107	1.33	1.46	112	135	136	138	4.3	4.7	2.6
1	0	4	9	6	4	1	1	6	1	0	0	0	0	0	0	0	0	0	0	0	4.04167	82	32.3	40.2	10.5	13.1	136	188	15.9	21.1	9	11	16	19	14	16	7.1	7.4	114	114	0.64	0.71	97	133	141	142	3.8	4.6	3.3
0	0	1	5	15	6	5	4	0	0	0	0	0	1	0	0	0	0	0	0	0	1.41667	59	32.9	32.9	11	11	101	101	9.4	9.4	7	7	20	20	15	15	8.6	8.6	112	112	1	1	160	160	139	139	4.4	4.4	1.1
0	0	2	3	10	6	3	1	0	3	0	0	0	0	0	0	0	0	0	0	0	1.45833	87	37.3	37.3	12	12	148	148	13.6	13.6	11	11	23	23	30	30	9	9	110	110	1.43	1.43	129	129	144	144	4.3	4.3	2.4
0	0	1	4	13	6	4	3	0	0	0	0	0	0	2	0	0	0	0	0	0	2.79167	87	28.3	28.3	9.2	9.2	160	160	19.8	19.8	7	7	22	22	20	20	7.9	7.9	109	109	1.2	1.2	283	283	138	138	4.8	4.8	1.1
0	0	1	6	14	6	4	4	2	0	0	0	0	4	0	0	0	0	0	0	0	1.70833	88	30.2	30.2	9.5	9.5	185	185	19.6	19.6	7	10	21	25	33	33	7.8	8	104	105	1.37	1.38	94	120	135	137	3.3	3.5	0.7
0	0	1	9	13	6	4	3	1	0	0	0	0	2	0	0	0	0	0	0	1	2.91667	58	21	21.7	6.7	6.9	294	299	11.9	12.5	8	8	24	24	33	33	7.8	7.8	98	98	3.65	3.65	237	237	130	130	3.1	3.2	1.5
1	0	1	7	3	1	1	1	1	3	0	0	0	0	0	0	0	0	0	0	0	3.75	57	29.1	29.1	10.1	10.1	578	578	17.8	17.8	11	11	24	24	14	14	7.3	7.3	102	102	0.59	0.59	119	119	137	137	2.5	4.8	0.9
0	0	1	3	13	6	3	4	0	3	0	0	0	0	0	0	0	0	0	0	0	1.25	84	34.6	33.4	11.4	10.9	55	34	7.5	6.6	9	9	25	24	23	19	8.9	8.8	110	109	0.6	0.36	133	104	143	140	4.9	4.4	3.4
0	0	1	9	8	5	1	2	2	0	0	0	0	2	0	0	0	0	0	0	0	4.33333	73	26.7	30.9	8.6	10.3	167	176	6.8	9.6	9	10	21	24	8	10	7.2	7.4	103	109	0.87	0.93	112	133	136	140	3.6	4	1
0	0	1	6	8	5	1	2	0	0	0	0	0	6	0	0	0	0	0	0	0	9.66667	74	19.5	19.5	6.7	6.7	50	50	0.8	0.8	7	7	24	24	18	18	7	7	105	105	0.53	0.53	97	97	136	136	4.2	4.2	1.35
0	0	1	4	15	6	5	4	3	0	0	0	0	0	3	0	0	0	0	0	0	2.79167	67	23.8	23.8	7.6	7.6	122	122	4.1	4.1	7	7	31	31	11	11	7.2	7.2	101	101	0.59	0.59	73	73	139	139	3.5	4.2	1.2
0	0	1	14	10	5	2	3	4	0	0	0	0	2	0	0	0	0	0	0	0	3.875	91	22.6	31.1	7.5	10.5	153	153	29.5	29.5	16	17	11	14	32	37	7.4	7.7	111	115	1.85	2.17	104	147	142	142	5.9	5.9	10.3
0	0	1	6	13	6	4	3	2	0	0	0	0	0	0	0	0	0	0	0	0	3.79167	75	28.9	28.9	9.5	9.5	97	97	17.4	17.4	10	10	13	13	22	22	7.1	7.1	125	125	1.42	1.42	84	84	148	148	3.6	3.9	1.6
0	0	1	5	14	5	5	4	0	0	0	0	0	2	0	0	0	0	0	0	0	4.83333	70	22.3	22.3	7.5	7.5	265	265	26.9	26.9	7	11	21	29	48	49	8.1	8.4	101	101	1.48	1.86	127	163	133	137	4.2	4.6	2
0	0	1	14	3	1	1	1	0	0	0	0	0	0	0	0	0	0	0	0	0	3.58333	53	28	30.8	9.5	10.9	92	111	0.4	3.3	6	11	18	25	45	61	8.3	9.6	108	114	1.02	1.38	70	151	139	146	3.8	4.1	2.6
0	0	1	4	15	6	5	4	0	0	2	0	0	0	0	0	0	0	0	0	0	2.79167	74	31.8	31.8	9.7	9.7	134	134	14.9	14.9	9	9	25	25	32	32	7.4	7.4	105	105	1.07	1.07	95	95	139	139	4	4	0.9
1	0	1	7	14	6	4	4	1	2	0	0	0	0	0	0	0	0	0	0	0	2.58333	89	30.7	30.7	10.6	10.6	311	311	22.5	22.5	9	12	17	18	49	61	7.6	7.6	104	110	1.87	2.39	111	117	133	137	3.2	4.1	0.6
0	0	1	6	15	6	5	4	0	0	0	0	0	2	0	0	0	0	0	0	0	3.70833	71	32.2	32.2	10.6	10.6	83	83	6.2	6.2	6	6	23	23	13	13	8.8	8.8	113	113	0.58	0.58	124	124	142	142	3.4	3.6	1.37
0	0	1	6	14	6	5	3	2	2	0	0	0	0	0	0	0	0	0	0	0	2.08333	91	36	36	11.4	11.4	137	137	12.2	12.2	8	8	18	18	35	35	8.3	8.3	118	118	0.98	0.98	138	138	144	144	5.5	5.5	1.7
1	0	1	17	3	1	1	1	4	0	0	0	0	0	0	0	0	0	0	0	0	3.08333	62	24.4	24.4	8.4	8.4	78	78	11.8	11.8	11	11	23	23	18	18	8.2	8.2	98	98	0.97	0.97	119	119	132	132	3.1	3.7	5.4
0	0	1	13	8	5	1	2	7	0	0	0	0	0	0	0	0	0	0	0	0	10.5833	79	31.7	31.7	10.4	10.4	146	146	17.5	17.5	11	11	19	20	38	43	7.5	8	107	108	1.96	2.4	95	134	137	139	3.8	4.1	1
0	0	1	8	15	6	5	4	2	0	2	0	0	0	0	0	0	0	0	0	0	2.66667	85	31.6	32.3	9.8	10	94	99	16.3	22.85	7	10	27	30	19	25	7	7.6	112	117	1.93	2.39	125	187	153	153	2.7	4.2	0.9
0	0	1	3	9	5	2	2	0	0	0	0	0	1	0	0	0	0	0	0	0	1.16667	84	36.9	44.2	11.9	14.4	127	213	8.4	14.9	11	18	20	25	13	16	7.7	8.4	98	106	0.86	0.95	145	318	138	142	3	4	1.7
0	0	1	10	8	3	1	4	2	0	0	0	0	0	0	0	0	0	0	0	0	1.45833	54	24.2	24.2	7.6	7.6	212	212	7.9	7.9	4	8	16	24	46	69	9.1	9.2	115	122	0.87	1.27	93	146	143	149	4.5	5.4	1.1
1	0	3	14	7	5	1	1	4	0	0	0	0	0	3	0	0	0	0	0	0	1.75	91	33.3	33.3	11.1	11.1	60	60	36.4	36.4	11	15	12	15	38	39	5.8	7	115	115	2.63	2.68	154	171	141	142	3.1	4.7	2.7
0	1	1	12	14	6	4	4	1	0	0	0	0	0	0	0	0	0	0	0	0	2.20833	48	34.1	34.1	11.5	11.5	62	62	22.3	22.3	13	14	15	15	64	64	6.2	6.7	109	111	3.8	4.2	162	238	138	139	4.3	5.6	3.5
0	1	1	11	3	1	1	1	3	0	0	0	0	0	0	0	0	0	0	0	0	1.29167	65	28.9	28.9	9.1	9.1	147	147	9	9	9	11	20	23	22	26	7.7	8.1	109	110	1.11	1.36	115	177	141	141	3.7	3.8	1.2
0	0	1	11	15	6	5	4	0	2	0	0	0	0	0	0	0	0	0	0	0	1.41667	50	33.6	36.1	11.4	12.5	12	13	12.2	14.8	8	10	24	28	62	77	6.7	7.1	93	99	4.43	4.84	101	123	129	134	3.1	3.3	1.1
0	0	1	5	15	6	5	4	1	5	0	0	0	0	0	0	0	0	0	0	0	2.08333	80	29.2	29.2	9.4	9.4	221	221	13.3	13.3	8	8	26	26	4	4	7.2	7.2	107	107	0.7	0.7	67	67	141	141	3.2	3.2	0.9
0	0	2	10	8	2	5	1	1	5	0	0	0	0	0	0	0	0	0	0	0	3.25	65	29.9	29.9	9.3	9.3	159	159	7.7	7.7	11	11	20	21	29	37	7.8	7.8	108	110	1.44	1.56	92	170	140	141	3.6	4.1	1.2
0	0	1	8	11	5	3	3	2	3	0	0	0	0	0	0	0	0	0	0	0	1.5	91	26.4	26.4	8.4	8.4	357	357	12.7	12.7	10	10	21	21	32	32	7.9	7.9	114	114	1.62	1.62	96	96	145	145	3.6	3.6	0.9
0	0	1	4	11	6	1	4	0	0	0	0	0	2	0	0	0	0	0	0	0	1.66667	70	30.8	31	10	10	255	276	26.5	29.6	8	8	26	26	20	21	8.7	8.8	102	104	0.51	0.52	122	152	136	138	4.5	4.7	1.2
0	0	4	10	6	1	1	4	0	1	0	0	0	0	0	0	0	0	0	0	0	49.75	70	25.6	25.6	8.7	8.7	222	222	39.2	39.2	9	12	22	24	153	154	7.5	7.7	90	91	1.63	1.66	44	75	124	124	4.7	4.9	0.5
0	1	1	10	13	5	5	3	1	0	0	0	0	0	2	0	0	0	0	0	0	2.95833	89	31.2	32.2	10.6	10.9	85	91	15.8	34.2	11	15	14	19	31	35	8.1	8.2	106	107	1.78	2.12	54	91	136	136	3.8	4	3.8
0	1	4	16	7	5	1	1	0	0	0	1	0	0	0	0	0	0	0	0	1	8.125	64	29.7	33.3	9.7	11.2	150	153	5.8	11.5	8	13	24	28	40	51	8.8	9.2	95	97	4.85	5.9	83	89	132	133	3.9	4.5	1.8
0	0	1	5	10	6	1	3	0	2	0	0	0	0	0	0	0	0	0	0	0	2.08333	56	33	33	10	10	217	217	11.8	11.8	8	8	26	26	9	9	9.2	9.2	108	108	0.9	0.9	144	144	142	142	4.3	4.3	0.9
0	0	1	5	14	6	4	4	1	0	0	0	0	5	0	0	0	0	0	0	0	1.54167	52	32.4	36.5	10.8	12.2	72	87	6.7	8.7	9	10	20	21	30	28	7.1	7.2	108	108	1.1	0.84	96	94	136	137	4	4	0.7
0	0	1	2	15	6	5	4	0	1	0	0	0	0	0	0	0	0	0	0	0	1.54167	53	23.9	23.9	7.8	7.8	185	185	5.5	5.5	8	8	22	22	10	10	6.8	6.8	111	111	0.58	0.58	85	85	141	141	2.6	3.6	1
0	0	1	5	15	6	5	4	3	1	0	0	0	0	0	0	0	0	0	0	0	2.58333	53	18.9	18.4	5.9	5.9	311	294	4.2	2	8	9.4	21	22	8	9	7.7	7.7	104	105	0.71	0.73	111	116	136	135	3.9	3.9	0.6
0	0	1	2	13	6	4	3	0	3	0	0	0	0	0	0	0	0	0	0	0	2.83333	48	36.3	36.3	12	12	274	274	16.1	16.1	10	10	25	25	18	18	8.2	8.2	103	103	0.8	0.8	351	351	138	138	4.1	4.1	1.1
0	1	4	5	13	6	5	2	0	2	0	0	0	0	0	0	0	0	0	0	0	6.41667	38	36.4	36.4	11.1	11.1	227	227	15.3	15.3	8	8	26	26	8	8	7.8	7.8	104	104	0.38	0.38	123	123	138	138	3.7	3.9	2.3
1	1	1	14	3	1	1	1	1	2	0	0	0	0	0	0	0	0	0	0	1	5.875	67	28.4	32.2	8.8	9.9	39	54	4.6	6	5	13	23	33	10	14	8.1	8.4	97	100	2.18	2.59	62	117	133	137	3.2	4.3	1.2
0	1	1	5	4	1	1	2	0	2	0	0	0	0	0	0	0	0	0	0	0	3.375	72	41.3	41.3	13.3	13.3	218	218	17	17	11	11	23	23	14	14	7.9	7.9	110	110	0.98	0.98	170	170	144	144	3.9	3.9	0.8
0	1	1	5	15	6	5	4	1	0	0	0	0	2	0	0	0	0	0	0	0	1.33333	86	32.6	30.7	10.4	9.8	241	221	19.4	17.6	11	9	26	25	38	40	7.8	7.9	105	106	0.9	1.18	66	83	141	138	4.8	4.7	3.1
0	1	1	2	15	6	5	4	0	0	0	0	0	0	3	0	0	0	0	0	0	1.20833	78	30.8	30.8	9.8	9.8	193	193	12.7	12.7	5	5	27	27	10	10	8.1	8.1	104	104	0.65	0.65	106	106	136	136	4.1	4.1	1
0	0	1	5	13	5	4	4	1	1	0	0	0	0	0	0	0	0	0	0	0	4.83333	58	28.3	28.3	8.1	8.1	395	395	18.6	18.6	11	11	15	15	31	31	9.3	9.3	117	117	1.47	1.47	132	132	143	143	3.8	4.1	2.2
0	0	1	7	3	1	1	1	0	0	0	0	0	4	0	0	0	0	0	0	0	10.4167	57	42.3	42.3	12.4	12.4	227	227	60.2	60.2	10	11	20	21	44	53	8.4	8.7	111	112	2.2	2.73	117	121	142	143	5.1	5.6	2.7
0	1	1	3	13	6	4	3	2	3	0	0	0	0	0	0	0	0	0	0	0	2.83333	74	35.4	31.2	11.8	10.3	269	241	20.1	33.2	5	5	21	21	39	39	9	9	113	113	1.27	1.27	142	142	139	139	4.9	4.9	0.8
0	1	1	7	7	5	1	1	0	1	0	0	0	0	0	0	0	0	0	0	0	1.45833	45	48.3	48.3	16.3	16.3	201	201	15.2	15.2	11	11	20	20	12	12	7.5	7.5	110	110	0.98	0.98	189	189	141	141	3.4	3.8	2
0	0	1	5	15	6	5	4	0	3	0	0	0	0	0	0	0	0	0	0	0	1.625	79	26.8	26.8	9	9	152	152	21.9	21.9	8	8	17	17	14	14	7	7	117	117	1	1	133	133	142	142	4	4	0.8
1	1	2	15	3	1	1	1	5	0	0	0	0	2	0	0	0	0	0	0	1	9.58333	82	23.5	23.5	7.5	7.5	207	207	19.3	19.3	9	10	22	23	48	54	9.1	9.3	107	108	3.41	3.88	111	146	139	140	4.7	4.7	1.2
0	1	1	6	8	5	1	2	0	0	0	0	0	1	0	0	0	0	0	0	0	7.58333	58	28.5	29.4	8.9	9.4	329	349	24.4	26.2	10	11	24	25	26	28	8.3	8.5	105	106	1.78	1.81	125	127	140	141	4.1	4.1	1.7
1	1	1	14	3	1	1	1	3	8	0	0	0	0	0	0	0	0	0	0	0	22.2083	77	23	27.2	8.1	9.5	121	121	39.2	39.2	13	16	23	25	40	53	6.7	7.8	102	104	3.1	3.9	92	100	140	143	4	5.2	4
0	1	1	6	4	1	1	2	0	0	0	0	0	0	0	0	0	0	0	0	0	10.0833	44	45.5	49.3	14.4	15.6	224	267	19.7	23	9	11	18	20	32	34	6.1	6.7	114	115	1.07	1.47	148	158	143	144	3.7	4.5	2.2
0	1	1	9	3	1	1	1	0	0	0	0	0	1	0	0	0	0	0	0	0	2.375	64	30.3	30.3	10.2	10.2	267	267	11.4	11.4	5	5	29	29	7	7	7.4	7.4	107	107	0.27	0.27	110	110	141	141	2.9	3.3	1.2
0	1	3	10	4	1	1	2	1	0	0	1	0	0	0	0	0	0	0	0	0	9	48	41.3	41.3	13.8	13.8	80	80	4.6	4.6	5	8	30	30	16	19	7.9	8	99	104	0.5	0.52	101	220	137	139	3.8	3.9	1.5
0	1	1	9	15	6	5	4	2	2	0	0	0	0	0	0	0	0	0	0	0	2.75	88	25.4	25.4	8.2	8.2	146	146	11	11	8	9	28	28	25	26	7.7	7.9	102	102	1.67	1.8	104	130	138	139	3.6	3.8	1.2
0	1	1	12	3	1	1	1	7	0	0	0	0	3	0	0	0	0	0	0	0	11.0417	46	40.3	40.3	13.5	13.5	254	254	49.5	49.5	11	19	11	15	20	25	5.8	6.5	110	117	2.4	3	177	250	138	145	3.8	6	3.8
0	0	1	6	15	6	5	4	2	4	0	0	0	0	0	0	0	0	0	0	0	1.70833	71	38.8	38.8	12.3	12.3	205	205	25.8	25.8	11	11	18	18	9	9	7.6	7.6	111	111	1	1	100	100	140	140	4.7	4.7	2.4
0	1	1	6	14	6	5	3	0	0	0	0	0	6	0	0	0	0	0	0	0	2	49	19.4	19.4	6.4	6.4	25	25	0.6	0.6	8	8	25	25	6	6	7.4	7.4	106	106	0.42	0.42	96	96	139	139	3	3	0.7
0	1	1	11	8	5	1	2	3	0	0	0	0	3	0	0	0	0	0	0	0	1.25	51	41.4	41.4	13.4	13.4	138	138	22.3	22.3	9	9	22	22	26	26	8.2	8.2	112	112	0.91	0.91	120	120	143	143	3.6	3.6	2
1	1	1	4	15	6	5	4	0	0	0	0	0	1	0	0	0	0	0	0	0	5.625	74	40.1	40.1	13.2	13.2	248	248	14	14	6	6	26	26	12	12	8.7	8.7	107	107	0.62	0.62	149	149	139	139	4	4	1.1
0	1	1	12	6	3	1	2	3	3	0	0	0	0	0	0	0	0	0	0	0	11.7083	81	29.2	33.2	9.6	10.8	181	274	11.8	20.9	8	11	27	27	41	43	7.8	8.1	99	101	1.43	1.81	165	195	136	137	3.4	3.9	1.2
0	1	1	3	15	6	5	4	0	2	0	0	0	0	0	0	0	0	0	0	0	1.45833	62	37.3	37.3	12.5	12.5	161	161	25.3	25.3	7	7	20	20	18	18	8	8	108	108	0.9	0.9	170	170	135	135	3.4	3.4	1.7
1	1	1	10	3	1	1	1	0	0	0	0	0	4	0	0	0	0	0	0	0	14.7917	60	36.8	36.8	12.4	12.4	216	216	13	13	11	11	24	24	28	28	8	8	106	106	0.95	0.95	248	248	141	141	3.8	3.8	2.1
0	1	4	13	7	5	1	1	4	4	0	0	0	0	0	0	0	0	0	0	0	1.83333	40	12.2	20.8	4.2	7.6	37	69	9.8	17.6	10	12	19	25	23	40	7.8	9.3	93	97	0.68	1.1	136	174	124	132	4.6	6.4	2.8
0	1	1	5	15	6	5	4	0	2	0	0	0	0	0	0	0	0	0	0	1	3.45833	63	34.9	34.9	11.3	11.3	255	255	9.3	9.3	11	11	29	29	29	29	9.3	9.3	95	95	8.31	8.31	93	93	135	135	4.5	4.5	1.7
0	1	1	12	3	1	1	1	0	0	0	0	0	4	0	0	0	0	0	0	0	9.5	57	30.3	30.3	10	10	165	165	65.4	65.4	13	13	12	12	99	99	7.8	7.8	104	104	5.28	5.28	155	155	129	129	4.9	4.9	1.1
0	1	1	8	10	5	1	4	0	4	0	0	0	0	0	0	0	0	0	0	0	10.0417	61	27.1	27.1	7.6	9.2	106	106	21.5	21.5	6	9	27	29	94	116	7.1	7.3	122	125	1.08	1.16	157	221	157	161	3.3	4.8	1.2
0	1	1	2	15	6	5	4	0	2	0	0	0	0	0	0	0	0	0	0	0	2.41667	50	32.1	32.1	10.9	10.9	197	197	7	7	5	6	23	26	9	11	8	8.9	103	109	0.62	0.83	191	202	131	139	3.7	4	1.9
0	1	1	12	4	1	1	2	6	4	0	0	0	0	0	0	0	0	0	0	1	3.83333	66	32	32.4	9.5	9.9	142	179	26.5	29.2	6	14	16	26	31	38	6.8	7.9	106	108	1.1	1.66	124	176	135	140	4.4	5.8	2.3
0	1	1	13	9	5	1	3	2	0	0	0	0	3	0	0	0	0	0	0	1	6.33333	65	27.6	29	9	9.3	262	288	11.3	13.4	12	14	17	18	58	70	8.9	8.9	101	104	3.19	3.34	110	117	133	133	4.6	5.2	1.6
0	1	1	8	13	6	4	3	0	0	0	0	0	1	0	0	0	0	0	0	0	1.58333	61	42.1	42.1	14.6	14.6	60	60	8.4	8.4	11	12	16	18	18	24	7.1	7.7	109	115	1.18	1.5	195	368	138	144	3.3	5	2
0	1	1	4	12	5	4	3	0	0	0	0	0	1	0	0	0	0	0	0	0	1.20833	41	31.5	31.5	10.4	10.4	154	154	22.8	22.8	8	8	23	23	16	16	7.8	7.8	111	111	1.14	1.14	92	92	142	142	4.1	4.3	1.5
0	1	1	3	15	6	5	4	0	0	0	0	0	5	0	0	0	0	0	0	0	5.08333	30	35.2	36.7	12.3	12.8	174	178	11	12.3	8	8	24	24	5	5	8.8	8.8	110	110	0.54	0.54	101	101	142	142	4	4	1.9
0	0	1	12	6	4	1	1	2	2	0	0	0	0	0	0	0	0	0	0	0	1.29167	28	35.4	35.4	12.3	12.3	117	117	11.1	11.1	8	11	20	23	15	16	6.6	7.7	112	114	1.05	1.2	106	118	143	145	3.7	5	1.7
0	0	1	6	7	4	1	2	0	0	0	0	0	4	0	0	0	0	0	0	0	11.5	48	28.3	28.3	9.5	9.5	208	208	18	18	12	12	21	21	19	19	8.4	8.4	109	109	0.7	0.7	138	138	142	142	4.4	4.4	3.8
0	0	1	4	15	6	5	4	1	0	0	0	0	0	2	0	0	0	0	0	0	2.75	48	25	25	8.9	8.9	297	297	22.2	22.2	6	10	22	23	17	29	7.3	7.6	91	105	0.6	0.9	79	128	124	133	2.8	3.1	0.6
0	0	1	7	7	4	1	2	0	0	0	0	0	0	2	0	0	0	0	0	0	4	29	38.3	38.3	12.9	12.9	340	340	34.1	34.1	8	10	22	23	9	18	9.1	9.8	134	134	0.83	0.85	131	190	165	171	3.5	3.7	1.4
0	0	1	9	6	1	1	4	0	0	0	0	0	1	0	0	0	0	0	0	0	19.7917	47	29.6	29.6	9.4	9.4	555	555	16.2	16.2	5	6	25	27	10	10	8.3	8.4	99	102	0.56	0.57	228	233	131	133	3.6	4	0.7
1	0	1	14	9	5	1	3	0	2	0	0	0	0	0	0	0	0	0	0	0	3.25	51	21.6	24.9	7.4	8.7	66	83	12.4	12.8	15	16	15	17	77	77	6.2	6.7	105	108	1.97	1.99	97	181	137	139	4.6	4.9	8.6
0	1	1	15	7	5	1	1	4	5	0	0	0	0	0	0	0	0	0	0	0	1.54167	74	41.3	41.3	14.1	14.1	141	141	15.5	15.5	13	13	15	15	20	20	7.6	7.6	120	120	1.3	1.3	82	82	148	148	3.4	3.9	1.8
0	1	1	6	15	6	5	4	0	0	0	0	0	3	0	0	0	0	0	0	0	2.875	57	25.8	25.8	8.8	8.8	63	63	0.6	0.6	13	13	17	17	13	13	8.3	8.3	110	110	0.53	0.53	220	220	140	140	2.8	3.8	2.9
0	1	4	9	15	6	5	4	2	0	0	0	0	0	1	0	0	0	0	0	0	3.20833	57	29.7	29.7	10.1	10.1	174	174	4.1	4.1	14	17	13	18	40	46	7.7	8.2	98	102	6.53	6.79	204	226	129	132	2.6	3.1	1.5
0	0	1	4	15	6	5	4	0	0	0	0	0	1	0	0	0	0	0	0	0	3.08333	60	33.8	33.8	10.8	10.8	154	154	16.7	16.7	7	7	26	26	15	15	8	8	104	104	0.63	0.63	130	130	137	137	4.2	4.2	1.4
1	1	1	13	3	1	1	1	6	0	0	0	0	6	0	0	0	0	0	0	0	17.3333	65	27.4	28.2	8.4	8.7	276	353	10.5	23.9	11	14	16	20	15	24	7.3	7.5	122	123	0.6	0.77	214	243	153	153	3.3	4.2	2
1	1	1	15	4	1	1	2	1	6	0	0	0	0	0	0	0	0	0	0	1	29.0833	66	21.5	26.4	6.3	8.2	96	144	12	14.2	19	22	18	24	33	42	8.3	9.3	100	103	3.57	5.04	86	320	140	146	4.3	5.1	5.7
1	0	1	9	9	6	2	1	2	0	0	0	0	0	1	0	0	0	0	0	0	13.625	86	39.9	45.2	12.4	13.8	155	179	6.5	11.4	7	7	22	22	30	30	6.6	6.6	113	113	1.08	1.08	120	120	142	142	4.7	4.7	2.4
0	0	4	15	8	5	1	2	2	4	0	0	0	0	0	0	0	0	0	0	0	3.875	62	22	25	8.1	8.1	83	83	1.7	1.7	11	11	20	20	53	53	7.7	7.7	113	113	1.3	1.3	213	213	142	144	4.3	4.5	2.5
1	1	1	4	7	4	1	2	0	0	3	0	0	0	0	0	0	0	0	0	0	12.25	80	42.9	42.9	13.4	13.4	124	124	5.4	5.4	4	4	29	29	15	15	8.9	8.9	107	107	1.1	1.1	68	68	140	140	4.6	4.6	0.4
0	0	1	5	15	6	5	4	1	5	0	0	0	0	0	0	0	0	0	0	0	1.45833	86	38.3	38.8	12.6	12.7	323	313	26.4	21.6	6.1	8	22	22	26	24	8.5	8.3	108	108	0.9	0.72	143	136	140	138	4.3	4.2	1.2
1	0	1	11	3	1	1	1	3	0	0	0	0	3	0	0	0	0	0	0	0	1.91667	43	26.8	32.3	7.6	9.1	337	358	22.4	44.4	5	5	37	37	16	28	8.6	9.5	90	94	0.45	0.85	138	185	132	136	3.8	4.6	1.8
0	0	1	5	15	6	5	4	0	1	0	0	0	0	0	0	0	0	0	0	0	1.625	27	33.7	33.7	11.1	11.1	192	192	5.6	5.6	13	13	18	18	14	14	8.6	8.6	109	109	1.56	1.56	81	81	140	140	3.3	3.3	1.5
0	1	3	9	3	1	1	1	0	0	0	1	0	0	0	0	0	0	0	0	0	11.75	40	19.6	21.9	6.4	7.4	295	346	3.7	5.7	9	9	24	24	18	18	8	8	105	105	1.35	1.35	97	97	138	138	3.2	3.2	0.8
0	1	2	2	14	6	5	3	0	0	0	0	0	1	0	0	0	0	0	0	0	1.79167	46	35.8	35.8	11.3	11.3	155	155	20.2	20.2	2	2	29	29	14	14	8.1	8.1	103	103	0.76	0.76	161	161	134	134	4.5	4.5	0.3
0	1	1	21	3	1	1	1	2	1	0	0	0	0	0	0	0	0	0	0	1	11.5833	27	27.4	30.7	9.9	10.8	22	47	7.3	8.3	10	17	23	24	83	126	6.2	7	90	99	2.78	4.35	113	143	130	133	4.5	4.8	2.3
0	0	1	17	10	6	1	3	3	2	0	0	0	0	0	0	0	0	0	0	0	4	72	33.4	33.4	11.6	11.6	83	83	23.4	23.4	15	15	16	16	40	40	6.7	6.7	110	110	1.88	1.88	112	112	141	141	2.3	3.1	1.7
0	1	4	10	3	1	1	1	1	3	0	0	0	0	0	0	0	0	0	0	0	7.79167	38	14.9	19.4	5.3	7	28	46	0.8	1.6	8	12	17	18	23	27	6.9	7	106	107	0.87	0.98	99	136	132	136	4.4	4.5	1.9
0	1	1	9	15	6	5	4	1	0	0	0	0	3	0	0	0	0	0	0	1	1.45833	61	31.9	31.9	10.3	10.3	156	156	7.8	7.8	11	11	24	24	44	44	8.6	8.6	95	95	6.87	6.87	206	206	130	130	4.5	4.5	0.8
0	0	1	11	3	1	1	1	1	0	0	0	0	0	1	0	0	0	0	0	1	3.20833	70	21.3	22.4	7.4	7.7	179	205	9.8	13.1	8	9	25	27	38	42	7.6	7.9	106	107	2.33	2.69	77	118	141	141	3.7	3.8	1.5
0	1	1	9	15	6	5	4	2	0	0	0	0	3	0	0	0	0	0	0	0	1	74	32.3	32.3	10.8	10.8	110	110	8.7	8.7	6	6	24	24	58	58	8.2	8.2	102	102	1.61	1.61	149	149	132	132	4.1	4.1	1.5
0	0	1	7	3	1	1	1	0	2	0	0	0	0	0	0	0	0	0	0	0	2.83333	70	42.8	42.8	13.9	13.9	155	155	22.6	22.6	6	10	23	26	48	50	9.5	9.6	102	111	1.18	1.35	207	694	135	144	3.9	4	2.1
0	0	1	5	7	4	1	2	0	0	0	0	0	0	1	0	0	0	0	0	0	5.41667	73	37.5	37.5	13.1	13.1	272	272	33.8	33.8	12	12	22	22	20	20	8.5	8.5	111	111	0.61	0.61	169	169	145	145	3.2	3.2	1.4
1	0	1	13	6	4	1	1	6	0	0	0	0	4	0	0	0	0	0	0	0	8.45833	73	12.7	33.1	4.2	11	89	248	42.7	89.5	12	15	16	23	22	28	6.1	7.8	107	113	0.88	1.23	99	196	138	147	2.7	4	5.3
0	0	1	5	14	6	4	4	4	3	0	0	0	0	0	0	0	0	0	0	0	2.45833	73	30.8	30.8	11	11	104	104	25.4	25.4	11	11	18	18	18	18	8.8	8.8	108	108	1.15	1.15	95	95	137	137	3.9	3.9	2.1
0	0	1	7	9	5	1	3	2	3	0	0	0	0	0	0	0	0	0	0	0	3.95833	42	27.8	28.4	9.3	9.4	72	81	5.6	5.7	8	11	17	18	12	16	6.2	7.4	108	114	1.04	1.15	171	364	135	140	3.1	3.9	1.5
0	0	1	5	13	6	4	3	0	5	0	0	0	0	0	0	0	0	0	0	0	1.625	67	36.5	36.5	11.6	11.6	222	222	21.2	21.2	6	9	25	27	18	23	8.4	8.7	109	110	0.95	0.97	85	88	143	143	3.5	4.4	0.9
0	0	4	6	8	2	4	2	0	2	0	0	0	0	0	0	0	0	0	0	0	2.58333	61	34.9	36.3	11.6	11.8	189	208	8.3	9	10	11	20	21	17	19	8.2	8.6	117	118	1.08	1.12	74	89	148	149	3.1	4.8	0.6
0	0	1	8	15	6	5	4	1	0	1	0	0	0	0	0	0	0	0	0	0	1.875	73	35	35	11.5	11.5	171	171	17.7	17.7	10	13	18	20	17	24	7.5	7.7	112	114	0.98	1.23	178	277	143	144	3.1	3.5	3.6
0	0	1	16	7	5	1	1	3	5	0	0	0	0	0	0	0	0	0	0	1	5.95833	79	18	18	6.1	6.1	85	85	13.2	13.2	17	20	19	23	38	42	7.3	7.4	91	94	4.7	5.22	216	250	131	133	4.4	5.1	11.5
[truncated: 6,820 more rows]
[truncated: 23 more columns]
