# Supplementary material
Source: Elsevier journal article supplement (https://www.sciencedirect.com/science/article/pii/S021056912200225X)
Supplement: mmc4 [file S021056912200225X:mmc4.xlsx]

## Sheet: mimic_train
hospital_expire_flag	sex	race	sofa	gcs_min	gcs_motor	gcs_verbal	gcs_eyes	vasonum	Penicillins_cephalosporins	Quinolone	Macrolides	sulfa	vancomycin	metronidazole	Tetracycline	Aminoglycosides	Meropenem	linezolid	other	crrt	los_icu	age	hematocrit_min	hematocrit_max	hemoglobin_min	hemoglobin_max	platelets_min	platelets_max	wbc_min	wbc_max	aniongap_min	aniongap_max	bicarbonate_min	bicarbonate_max	bun_min	bun_max	calcium_min	calcium_max	chloride_min	chloride_max	creatinine_min	creatinine_max	glucose_min	glucose_max	sodium_min	sodium_max	potassium_min	potassium_max	lactate_min
1	0	2	3	15	4	0	1	1	1	0	0	0	1	0	0	0	0	0	0	0	9	77	33.6	36	10.4	11.4	149	171	12	18.4	11	11	33	33	26	30	8.7	9.8	96	98	1	1.1	145	148	136	138	4	4.2	1.1
0	0	1	2	13	6	4	3	0	0	0	0	0	0	0	0	0	0	0	0	0	9	76	39.3	39.3	13	13	273	273	4.3	4.3	12	12	23	23	26	26	9.4	9.4	107	107	0.8	0.8	127	127	142	142	4.8	4.8	1.3
0	1	1	2	13	6	4	3	0	1	0	1	0	0	0	0	0	0	0	0	0	2	52	43.1	43.4	14.2	14.4	282	307	16.9	20.7	11	12	18	23	20	24	7.4	7.9	97	106	0.8	0.9	189	276	132	135	4.4	5.3	1.7
0	0	2	9	3	1	1	1	0	1	0	0	0	1	0	0	0	0	0	0	0	12	75	21.7	35.9	7.7	13	39	137	3.4	5.6	16	26	10	15	8	12	7.6	8.5	105	112	0.6	1	113	148	138	141	4.2	5	3.3
0	1	2	6	12	6	2	4	0	2	1	0	0	2	0	0	0	1	0	0	0	4	46	34.1	38.7	11.3	12.9	12	31	4.9	24	26	28	11	14	83	93	6.8	7.7	93	97	6.7	8.3	129	425	131	133	3	4.3	2.7
0	1	1	2	9	4	2	3	0	1	0	0	0	1	0	0	0	0	0	0	0	10	85	25	27.6	8.1	8.7	135	170	22.1	25	17	18	20	27	61	66	7.8	8.7	87	97	1.6	2.3	103	133	125	129	4.6	4.8	1
0	0	1	2	14	6	4	4	0	1	0	0	0	0	0	0	0	0	0	0	0	5	63	37.3	48.4	12.5	16.2	166	212	14.1	15.7	18	20	20	22	9	13	8.7	9.6	93	101	0.9	1.3	127	228	132	141	3.4	8.4	1
1	1	1	8	3	1	1	1	0	0	0	0	0	0	0	0	0	0	0	0	0	5	64	32.7	38.4	10.6	12.4	481	635	14.4	16.1	14	17	20	23	13	15	8.4	8.5	97	100	0.2	0.3	128	182	134	136	3.7	4.2	1.3
0	1	4	2	11	5	2	4	0	0	0	0	0	0	0	0	0	0	0	0	0	8	50	30.3	30.9	10	10.3	173	199	7.4	7.4	13	17	24	26	40	44	9.2	9.5	107	109	3.3	3.4	86	94	144	146	3.4	3.7	0.7
0	1	1	5	15	6	5	4	1	0	0	0	0	0	0	0	0	0	0	0	0	2	69	29.4	38.1	9.8	11.9	104	137	13.3	24.1	14	15	22	23	17	18	8.2	8.2	105	107	1	1.2	101	101	138	138	4	4.6	2.5
0	1	1	2	14	6	5	3	1	0	0	0	0	0	0	0	0	0	0	0	0	2	65	22	29.8	7.2	9.8	225	255	12.1	14.9	7	15	22	27	13	16	8.1	8.1	104	108	0.8	0.9	118	118	137	139	3.4	4.4	1
1	1	1	11	11	6	1	4	1	0	0	0	0	0	0	0	0	0	0	0	1	20	68	13	29.2	3.9	9.6	50	394	8.4	23.1	30	40	8	11	80	154	7.9	9.4	91	105	2.6	4.5	76	217	131	141	3.6	5.1	7.3
0	0	1	2	15	6	5	4	0	1	0	0	0	0	0	0	0	0	0	0	0	2	58	28.1	40.6	9.3	13.8	104	189	9.4	15.6	4	22	10	46	8	17	7	7.7	82	107	0.3	0.9	83	942	128	135	2.3	4.1	3.7
1	0	1	4	8	4	1	3	0	0	0	0	0	0	0	0	0	0	0	0	0	4	88	36.2	37.4	11	11.3	141	155	13	18.9	23	24	24	26	49	55	8.5	8.5	94	96	6.6	7.2	136	215	137	140	4.3	6	2.8
0	0	1	2	9	5	1	3	0	1	0	0	0	0	0	0	0	0	0	0	0	9	27	32.3	35.8	10	11	208	243	9.2	14.7	10	10	25	25	8	9	8	8	110	110	0.6	0.7	101	101	141	141	4.1	4.1	1.5
1	0	1	7	4	1	1	2	1	0	0	0	0	0	0	0	0	0	0	0	0	8	82	36.6	43	11.7	13.6	200	268	10.9	13.9	18	23	17	20	10	16	7.6	9.2	97	110	0.6	0.9	112	170	135	142	3.1	4.5	2.1
0	0	1	8	10	5	2	3	0	1	0	0	0	1	0	0	0	0	0	0	1	8	70	23.4	25.1	7.3	7.9	65	77	5.2	7.8	19	21	15	17	134	141	9.2	9.8	103	108	3.5	3.9	130	143	140	144	3.6	4.1	1.4
1	0	3	2	9	5	1	3	0	0	0	0	0	1	1	0	0	0	0	0	0	9	63	17.1	30.1	5.4	9.8	27	72	16.6	23.3	14	22	11	19	17	23	7.8	9	96	102	1.1	1.5	61	93	130	135	4.3	5.4	6.8
0	0	1	3	14	6	5	3	0	0	0	0	0	0	0	0	0	0	0	0	0	2	63	41.1	43.9	13.1	13.5	272	324	9	10.9	11	13	31	33	28	30	7.9	8.6	96	99	1.1	1.3	91	148	133	137	5.1	5.5	0.9
0	0	1	2	14	6	4	4	0	1	0	0	0	1	0	0	0	0	0	0	0	4	84	37.3	41.4	12.9	14	173	220	9.4	20.1	14	20	18	22	12	18	6.7	8.4	103	107	0.5	0.8	101	192	137	140	3.3	4.4	0.6
0	0	4	2	9	4	1	4	2	0	0	0	0	0	0	0	0	0	0	0	0	2	59	32.9	33.1	11.4	11.5	201	225	6.9	9.9	10	16	20	21	7	8	8.1	8.1	107	117	0.6	0.6	106	189	139	144	3.5	3.9	0.8
0	0	2	2	10	5	1	4	0	1	0	0	0	1	0	0	0	0	0	0	0	4	57	33.9	43.5	10.7	13.6	325	488	10.2	17.1	11	15	30	33	13	14	9.3	10	98	105	0.3	0.3	116	207	138	143	3.7	5.3	0.9
0	1	1	9	8	4	1	3	0	1	0	0	0	0	0	0	0	0	0	0	0	13	78	37.1	55.2	12.7	18.4	109	201	4.1	9.4	17	34	11	17	52	58	7.4	10.1	98	106	4.7	6.2	106	152	133	140	2.6	4.2	1.8
0	0	1	5	15	6	5	4	1	0	1	0	0	0	0	0	0	0	0	0	0	3	70	30.9	32	10.1	10.4	221	234	90.7	116.1	19	20	15	16	35	38	7.2	7.6	104	107	2.5	3.2	108	258	136	138	3.4	3.7	3.7
0	0	4	2	15	6	5	4	1	1	0	0	0	0	0	0	0	0	0	0	0	3	62	24.3	30	8.3	10.1	185	209	11.8	16.7	8	12	23	24	12	15	8.1	8.9	108	113	0.4	0.6	101	101	138	141	3.7	4.7	1
0	1	1	2	14	6	5	3	0	0	0	0	0	0	0	0	0	0	0	0	0	7	50	21.3	30.1	7.2	9.9	140	312	13.1	21	15	18	20	26	16	17	7.2	8.1	101	106	0.8	0.9	125	147	139	140	3.5	4.4	1.2
0	0	1	2	11	5	2	4	0	0	0	0	0	0	0	0	0	0	0	0	0	2	90	34.7	37.1	10.7	11.6	349	407	20.4	20.6	11	18	15	21	14	33	6.8	9.4	95	136	0.4	0.8	91	352	121	168	2.7	4.6	1.5
0	1	1	2	12	5	3	4	0	0	1	0	0	1	0	0	0	0	0	0	0	7	55	23.1	26.8	7.5	8.9	159	169	5.8	7.3	9	11	27	28	14	15	7	7	105	108	0.9	0.9	331	383	139	140	4.4	4.7	1.5
0	1	4	4	13	6	4	3	1	0	0	0	0	1	0	0	0	0	0	0	0	9	71	32.4	44.9	10	13.2	151	226	9.3	13.5	8	18	24	27	31	35	7.6	9.5	99	111	1.2	1.6	34	146	132	141	4.3	7.7	1.1
0	1	1	2	11	6	1	4	0	1	0	0	0	0	1	0	0	0	0	0	0	15	42	33.2	41	10.9	13.5	149	214	4.3	10.8	15	19	16	20	14	23	6.4	7	106	112	1.2	2.3	125	159	135	139	4.8	6.5	3.1
0	1	1	5	11	5	4	2	0	1	0	0	0	0	0	0	0	0	0	0	0	2	90	27.3	29.3	9	9.9	234	257	8.8	12.2	12	17	15	20	37	62	7.6	8.5	112	120	1.7	2.9	98	146	144	147	3.9	4.5	1.5
0	1	1	2	10	6	1	3	1	1	0	0	0	0	0	0	0	0	0	0	0	5	33	33.9	39.9	10.5	12.1	230	358	10.8	20.1	17	19	23	27	16	18	8.2	8.6	96	98	0.9	1.1	70	102	135	138	3.6	4	1.2
0	1	1	2	14	6	5	3	1	0	0	0	0	0	0	0	0	0	0	0	0	4	54	39.7	46	13.1	15	188	240	11.1	17.8	16	18	26	28	39	47	8.7	9.6	93	100	1.6	1.8	102	144	135	141	3.3	4.2	0.6
0	1	1	2	10	5	2	3	0	0	0	0	0	0	0	0	0	0	0	0	0	7	63	27.5	42.1	8.8	12.8	87	140	19.2	46.8	13	16	24	27	31	42	7.7	8.2	103	106	1.5	3.1	122	154	143	144	5	5.9	1.7
0	1	1	5	14	5	5	4	0	0	0	0	0	0	0	0	0	0	0	0	0	2	69	19.5	31.4	9.3	10.8	85	208	4.8	9.7	8	9	23	26	15	23	7.1	8.4	111	117	0.8	1	76	76	141	145	3.9	4.2	1.4
1	1	1	2	3	1	1	1	0	0	0	0	0	0	0	0	0	0	0	0	0	21	85	29.2	30.2	8.1	8.5	179	218	11.5	13.7	17	24	17	22	36	42	8.1	9.3	105	109	1.8	2.2	116	125	142	144	3.8	4.6	1.2
1	1	1	7	15	5	0	3	1	1	0	0	0	1	0	0	0	0	0	0	0	4	77	29.2	34.7	10.1	11.9	55	199	10.8	17.9	19	22	15	19	18	32	7.1	9.3	103	106	1.4	2.7	183	270	135	138	4.1	5.4	4
0	0	1	2	10	6	1	3	0	0	1	1	0	0	0	0	0	0	0	0	0	3	47	31.9	32.9	10.5	11.3	198	215	9.6	10.6	17	23	20	25	10	15	7.9	8	97	104	0.9	1.1	227	525	133	142	3.6	4.9	1.6
0	0	1	2	10	5	1	4	0	0	0	0	0	0	0	0	0	0	0	0	0	13	70	35.9	39.6	11.9	13.2	208	218	14.8	19.7	12	15	24	25	13	16	8.3	8.3	96	108	0.6	0.8	120	135	132	141	3.4	3.9	1.9
0	1	1	2	11	5	4	2	0	0	0	0	0	0	0	0	0	0	0	0	0	3	42	32.3	41.7	11.3	14.4	59	112	6.3	8.4	14	33	15	26	6	12	6.9	8.8	96	101	0.6	1.4	90	161	128	140	3	4.7	1.4
0	0	1	3	9	4	1	4	0	0	0	0	0	0	0	0	0	0	0	0	0	6	49	36	41.2	12	13	123	148	12.4	20.3	18	23	11	21	22	34	6.5	8	111	119	1.2	2.4	169	358	140	158	3.4	5.4	2.1
0	1	1	3	15	6	5	4	0	0	0	0	0	0	0	0	0	0	0	0	0	2	49	31.2	35.6	11	12.6	251	293	12	21.9	11	11	25	26	18	19	8.2	8.3	103	105	0.9	1	102	102	136	136	4.3	4.4	2.2
1	1	1	3	8	5	1	2	0	0	0	0	1	0	0	0	0	0	0	0	0	10	67	27.3	28.9	9.3	9.5	49	107	16.6	45.6	14	18	23	27	17	17	7.9	7.9	91	92	1	1.1	204	251	129	129	3.4	4	1.7
0	1	4	3	11	6	1	4	0	0	0	0	0	0	0	0	0	0	0	0	0	7	90	34.2	37.1	12	12.7	126	157	9	13.9	10	13	22	26	18	20	7.4	8	105	108	1	1.3	154	180	137	140	3.9	4.2	1.2
0	1	1	4	3	1	1	1	0	1	1	0	0	1	0	0	0	0	0	0	0	18	58	42.1	49.1	14.1	16.2	175	432	9.4	28.9	16	21	15	25	27	42	6.6	8.1	96	109	1	3.5	133	371	134	141	3.4	4.4	3.6
0	0	1	4	14	6	5	3	0	0	0	0	0	0	0	0	0	0	0	0	0	8	75	29.6	33.1	10.1	11	198	226	6.3	7.7	11	13	24	25	48	54	7.5	7.5	107	110	1.3	1.4	79	79	139	143	3.7	4.6	0.8
0	0	4	5	10	5	1	4	0	1	0	0	0	0	1	0	0	0	0	0	0	3	31	34	35.3	11.7	11.7	293	293	13.5	13.5	11	13	24	24	5	8	8.5	8.6	104	107	0.1	0.1	89	140	135	141	3.1	3.9	0.6
1	1	4	2	3	1	1	1	1	1	0	0	0	0	0	0	0	0	0	0	0	10	79	49	53.4	15.5	17.3	168	183	9.5	16	14	19	21	23	21	27	7.4	8.2	99	108	1.3	1.6	166	213	133	143	4.1	6.3	1.6
1	1	4	9	13	5	5	2	0	1	0	1	0	0	0	0	1	1	0	0	0	4	59	36.7	40.1	11.8	12.9	11	36	3.5	15.5	18	27	14	23	35	47	5.4	7	106	112	1.9	3	127	162	142	150	4.3	5.2	2.4
1	0	4	16	3	1	1	1	1	0	0	0	0	0	0	0	0	0	0	0	0	3	62	20.9	23.1	7.1	8	27	63	5.7	11.1	21	26	19	23	68	75	9.6	10.6	87	88	3	3.6	163	284	125	127	4.6	5.5	5.9
0	1	3	4	14	6	5	3	0	0	0	0	1	1	0	0	0	0	0	0	0	2	49	30.6	35.1	10.7	12.2	284	365	12.3	23	10	18	17	22	12	17	6.9	8.3	84	104	0.5	1	99	175	120	131	3.3	4	1.9
1	1	1	3	3	1	1	1	2	0	0	0	0	0	0	0	0	0	0	0	0	16	52	27.2	32.5	9	10.2	40	82	5.9	13	14	27	11	19	17	26	6.6	8.4	107	110	1	1.6	70	126	136	141	3.4	4.6	1.2
0	1	1	2	10	6	2	2	0	0	0	0	0	0	0	0	0	0	0	1	0	5	33	37.6	46.6	13.2	15.4	171	226	13.7	14.4	15	25	18	22	7	8	8	8.7	102	110	0.7	0.7	163	221	141	143	3.5	3.8	2.5
0	1	1	4	7	5	1	1	0	0	0	0	0	0	0	0	0	0	0	0	0	8	44	30	31.3	9.2	9.8	297	323	8.9	11.5	16	18	22	27	15	19	7.7	8.2	99	102	0.8	0.9	64	123	136	139	4.3	6.2	0.9
0	0	1	3	15	6	5	4	1	0	0	0	0	0	0	0	0	0	0	0	0	3	62	24.9	32.5	8.8	11.2	228	263	12.7	22	6	11	24	26	11	11	7.4	8	109	112	0.6	0.7	91	91	139	140	4	4.5	1.5
0	0	2	6	10	5	2	3	0	1	0	0	0	2	0	0	0	0	0	0	0	16	48	13.7	33.3	4	10.7	144	240	6.7	13.7	14	22	8	11	34	62	6.4	7.8	111	123	1.7	2.9	111	315	139	145	2.8	5.4	1.5
0	0	1	4	13	6	4	3	2	0	0	0	0	0	0	0	0	0	0	0	0	6	69	21.3	31.8	6.6	10.2	155	213	9.7	14.9	11	16	21	26	56	61	8.3	8.3	96	99	1.9	2.2	177	280	130	138	4	4.5	2.7
0	1	1	6	11	5	3	3	0	0	0	0	0	1	0	0	0	0	0	0	0	2	94	28.1	30.4	7.9	8.4	128	149	9.7	13.1	18	20	18	19	31	38	8.3	8.3	105	112	1.4	1.7	86	107	139	144	4.3	5.5	3
0	1	1	2	14	6	4	4	0	0	0	0	0	0	0	0	0	0	0	0	0	11	65	32	32.8	10.9	11	122	134	7.2	8.1	15	20	20	24	25	26	7.8	8.1	96	100	1.9	2.6	214	247	132	135	3.6	4.4	1.2
1	1	1	2	9	5	1	3	0	0	0	0	0	0	0	0	0	0	0	0	0	10	88	28.8	33.3	9.3	10.5	197	211	96.4	104.4	13	18	25	27	41	46	7.8	8.8	99	104	1.5	1.7	118	146	138	140	4.1	4.4	2
0	1	1	5	15	6	5	4	1	0	0	0	0	0	0	0	0	0	0	0	0	3	54	32.7	35.3	10.8	11.4	174	222	12.3	21.2	13	13	25	25	19	19	8.6	8.1	105	106	1.2	1.2	108	108	139	139	4.3	4.6	3.3
0	1	1	8	14	6	5	3	0	0	0	0	0	1	0	0	0	0	0	0	0	4	63	34.1	37.2	11.6	13.2	23	33	8.8	10.7	16	21	15	16	115	119	7	7.4	105	111	3.4	4.1	164	192	137	140	3.4	3.6	1.5
0	1	2	3	13	6	4	3	2	1	0	0	0	0	0	0	0	0	0	0	0	3	58	29.4	31.1	9.9	10.1	86	142	8.9	10	10	14	22	23	16	23	8.2	8.5	107	109	0.9	1.1	150	261	138	140	3.7	4.4	0.7
0	0	1	3	10	4	2	4	0	0	0	0	0	0	0	0	0	0	0	0	0	2	93	41.6	45.9	12.5	13.7	134	150	9.5	10.3	12	15	17	19	93	127	9.5	9.5	145	145	1.8	2.4	106	200	167	177	4.2	4.9	1.3
0	1	2	4	11	6	1	4	1	1	0	0	0	1	0	0	0	0	0	0	0	20	59	36.3	41.5	11.6	13.1	258	304	8.9	15	13	16	22	25	6	9	8.1	9	100	103	0.6	0.7	88	257	138	141	4.5	5.2	0.7
0	1	1	5	12	6	5	1	0	1	0	0	0	0	0	0	0	0	0	0	0	4	81	28.1	31	10.3	11.2	85	90	4.1	5.5	12	15	25	26	13	17	7.5	8.1	98	104	0.6	0.7	102	129	136	139	2.5	4	1.2
0	0	1	3	9	5	1	3	0	0	0	0	0	0	0	0	0	0	0	0	0	3	80	16.6	24.4	5.3	8.2	228	386	11.6	16.9	12	17	13	23	18	34	4.9	8	104	120	0.4	0.9	78	152	141	146	3.5	4.2	1.3
0	0	1	3	14	6	5	3	0	0	0	0	0	0	0	0	0	0	0	0	0	2	57	22.4	23.6	7.1	7.7	590	636	9.6	12.1	11	12	20	25	13	16	7.2	7.6	105	111	1	1.2	100	107	136	140	3.7	4.3	0.9
0	1	1	2	15	6	5	4	0	0	0	0	0	0	0	0	0	0	0	0	0	2	57	39.6	39.8	12.7	13.1	221	245	9.6	12	12	13	27	28	18	18	8.9	9.3	102	102	0.5	0.5	88	103	138	138	3.9	4.3	1
0	1	4	7	14	6	4	4	0	1	1	0	0	0	0	0	0	0	0	0	0	6	60	30.9	36.2	9.8	11.4	126	196	16.5	31.1	14	21	20	23	65	68	8.1	8.3	109	112	3.4	3.7	94	280	142	145	4.3	6.4	1.1
1	1	2	2	13	4	5	3	0	0	0	0	0	0	1	0	0	0	0	0	0	2	87	24.9	30.7	7.2	8.9	276	300	7.6	15.6	15	23	17	24	23	47	8.1	9.3	102	105	1.4	2.6	137	287	137	140	3.9	5	5
0	0	2	2	14	6	5	3	0	1	0	0	0	0	0	0	0	0	0	0	1	3	63	22.9	27.8	6.7	8	360	465	9.9	10.5	17	24	19	29	60	126	8.5	9.1	96	99	3.3	5.2	100	119	134	138	3.8	8.1	0.7
0	1	2	7	10	6	1	3	0	1	0	0	0	1	0	0	0	0	0	0	0	10	61	23.5	30.8	8.1	10.5	58	119	6.7	10.1	18	24	21	23	26	41	8.1	10.3	98	100	1.5	3.2	135	329	141	143	4.5	5.3	2.5
0	1	1	7	14	6	4	4	1	1	0	0	0	1	0	0	0	1	0	0	0	5	67	22.4	28.4	7	9.1	296	603	16	26.4	15	19	15	20	21	27	7.1	7.7	105	107	1.6	2.4	87	133	139	142	5.2	5.8	2.1
0	0	1	9	6	1	1	4	2	0	0	0	0	0	1	0	0	0	0	0	0	34	83	24.1	45.4	7.7	15.3	58	186	6.8	12.3	8	14	18	22	13	21	8.7	8.7	103	115	0.8	1.1	104	141	137	143	4.6	4.7	1
0	1	1	13	12	5	4	3	1	1	0	0	0	0	0	0	0	0	0	0	1	2	50	22.1	24.3	7.8	8.6	332	473	17.5	24.5	24	28	15	19	122	200	7.6	9.3	88	95	7.5	13.2	127	199	133	138	5.8	7.2	1.3
0	1	1	8	14	5	5	4	0	0	0	0	0	0	0	0	0	0	0	0	0	2	69	25.6	40	8.6	13	178	330	7.5	16.9	13	16	21	25	20	23	8	9.4	103	108	1.6	1.7	93	116	136	140	4.2	4.4	1.6
1	0	3	7	8	5	2	1	0	0	0	0	0	0	0	0	0	0	0	0	0	13	63	32.8	32.8	9.5	9.6	453	482	15.7	30.7	30	31	30	34	35	41	9.2	9.5	86	88	5.2	6.5	171	214	147	152	3	3.7	1.6
0	0	1	2	15	6	5	4	0	0	0	0	0	0	0	0	0	0	0	0	0	2	74	28.5	28.6	9	9	106	128	4.5	5.9	10	18	22	27	12	14	7.8	8.4	103	104	0.6	0.7	101	130	136	140	3.7	4.1	0.8
0	1	4	2	10	6	1	3	0	0	0	0	0	0	0	0	0	0	0	0	0	6	73	38.1	40.9	12.7	14.1	201	222	13	16.3	12	12	22	22	20	25	8.3	8.3	111	111	0.9	1.1	100	100	141	141	3.9	3.9	1.5
0	1	4	3	9	5	1	3	0	1	0	0	0	1	0	0	0	0	0	0	0	15	82	45.9	51.1	16.2	17.7	105	155	46.1	61.3	17	20	24	25	20	28	8.5	8.8	95	97	0.6	0.8	130	151	134	136	3.5	3.9	2.9
0	0	4	3	9	5	1	3	0	1	0	0	0	1	0	0	0	0	0	0	0	3	81	37.1	43.1	12.5	13.7	204	222	13.8	21.5	15	16	15	21	30	35	7	7.5	103	107	1.1	1.5	117	172	134	137	4.4	4.7	1.3
1	1	4	4	4	1	1	2	2	1	0	0	0	1	0	0	0	1	0	0	0	13	75	21.6	28.4	6.3	9	122	153	6.4	10	12	16	10	19	58	61	8.2	8.5	116	122	3.2	3.8	65	177	148	151	4	6.3	1.4
0	0	4	3	15	6	0	4	0	0	0	0	0	0	0	0	0	0	0	0	0	4	52	32.7	35.7	11.1	12	245	293	10.6	13	14	15	21	23	4	9	7.5	9.1	104	110	0.6	0.8	129	178	139	142	3.2	3.9	1.5
0	0	1	3	13	6	4	3	0	2	0	1	0	1	0	0	0	0	0	0	0	3	59	35.1	36.7	10.9	11.5	266	275	4.6	5.5	9	11	24	26	6	10	8.6	8.9	106	106	0.7	0.9	100	113	139	143	4.3	4.6	1.3
1	0	1	8	3	1	1	1	1	0	0	0	0	0	0	0	0	0	0	0	0	5	62	36.1	37	11.3	12.2	255	305	11.3	15.7	14	19	16	19	29	38	8.1	8.6	99	103	0.9	1.1	153	395	134	138	3.2	5.2	1.7
0	1	1	7	4	1	1	2	0	0	0	0	0	0	0	0	0	0	0	0	0	4	81	35.5	39.7	11.6	12.5	111	116	5.4	9.1	13	14	22	26	13	19	7.6	8.2	112	114	1.1	1.3	53	125	145	149	3.9	4.3	0.7
0	0	1	7	14	6	5	3	2	0	0	0	0	0	0	0	0	0	0	0	0	3	57	24.1	29	8.3	9.8	55	65	8.9	11.8	8	21	13	20	19	22	7	8.7	93	105	0.6	1.1	49	308	128	133	2.7	5.4	1.1
0	1	1	5	6	4	1	1	2	0	0	0	0	0	0	0	0	0	0	0	0	6	73	32.7	35.7	11	12.3	146	176	10.8	15.8	10	15	20	24	23	24	8.5	8.5	102	103	1.1	1.4	131	144	137	137	3.6	4.2	0.9
1	1	1	2	3	1	1	1	0	1	0	1	0	0	0	0	0	0	0	0	0	11	84	20.6	23	6.7	7.3	129	159	8.3	9	11	15	25	28	21	23	7.3	7.5	109	113	0.5	0.6	109	227	145	148	3	3.7	1.7
1	1	4	4	15	6	5	4	0	0	0	0	0	0	0	0	0	0	0	0	0	3	54	29.5	29.5	9.6	9.6	34	34	7.8	7.8	12	12	24	24	74	74	7.7	7.7	108	108	1.2	1.2	290	290	140	140	4.2	4.2	1.6
1	1	4	6	3	1	1	1	0	0	0	1	0	0	0	0	0	0	0	0	0	4	84	43.1	49.5	12.9	14.8	188	210	9.6	10	15	17	25	32	31	43	7.3	7.3	106	119	0.6	1.1	406	745	148	155	3.8	5.8	1.4
0	1	1	5	14	6	4	4	1	1	0	0	0	1	0	0	0	0	0	0	0	4	64	17.8	24.9	5.7	8.2	27	52	0.3	1	11	16	19	23	8	9	7.1	8.1	100	106	0.4	0.6	123	172	135	141	3	3.6	1.4
0	0	1	2	14	6	5	3	0	1	0	0	0	0	0	0	0	0	0	0	0	2	55	23.6	31.2	8.3	10.4	131	274	11	20.1	8	13	20	21	10	11	7	7.1	112	113	0.4	0.6	132	146	140	147	3.5	4.2	2.8
0	0	4	4	15	6	5	4	1	0	0	0	0	0	0	0	0	0	0	0	0	3	62	25.7	33.3	8.6	11.2	85	183	17.8	25.5	13	16	19	20	11	15	7.6	8.5	101	107	1.1	1.3	130	158	136	140	4.1	6.1	2.7
0	1	1	2	14	6	4	4	1	0	0	0	0	0	0	0	0	0	0	0	0	3	84	20.5	30.7	6.9	9.2	141	183	13.8	21	8	8	22	23	17	20	8	8	111	111	0.9	1	119	119	142	142	4.3	4.5	1.6
0	1	4	4	3	1	1	1	1	0	0	0	0	1	0	0	0	0	0	0	0	8	49	41.3	44	13.6	14.2	341	440	7.9	26.1	14	18	18	22	15	17	7.6	8.3	108	112	1.2	1.5	119	128	140	143	5	5.2	2.2
0	1	1	4	14	6	5	3	0	0	0	0	0	0	0	0	0	0	0	0	0	3	77	32	32.5	10.2	10.9	145	162	8	19.4	8	13	21	22	18	24	7.8	8.1	105	107	1.4	2.2	94	124	137	139	5.1	5.1	1.2
0	1	4	2	3	1	1	1	0	0	0	0	0	0	0	0	0	0	0	0	0	20	49	37.8	41.5	13.2	14.2	246	246	10.1	10.5	16	17	23	24	19	21	7.9	7.9	100	107	0.7	1.1	158	158	135	142	3.2	3.7	1.6
0	1	1	4	15	6	5	4	0	0	0	0	0	0	0	0	0	0	0	0	0	3	71	32.6	36.7	10.9	11.7	133	172	8.1	8.7	9	11	22	23	19	20	8.2	8.2	104	106	0.9	1.1	111	111	135	135	4.8	5	2.4
0	1	1	7	4	1	1	2	1	0	0	0	0	0	0	0	0	0	0	0	0	4	67	20.4	24.7	6.1	7.6	197	222	8.3	10.7	9	9	29	29	42	42	7.9	7.9	104	104	2.7	2.7	118	118	142	142	3.6	3.6	0.7
1	1	1	2	3	1	1	1	0	1	0	0	0	0	0	0	0	0	0	0	0	5	81	38.9	50.4	14.1	17.9	150	209	7.5	12.4	14	19	14	17	47	53	6.7	8.1	97	103	2.1	2.8	92	118	131	133	4	4.7	4.7
0	0	1	3	14	6	5	3	0	0	0	0	0	0	0	0	0	0	0	0	0	4	39	21.7	26.4	7.6	8.6	174	236	5.9	12.3	14	15	14	18	29	41	9.3	9.6	107	110	4.1	6.1	101	141	132	136	5.3	5.6	1.3
0	1	1	4	15	6	5	4	0	1	0	1	0	0	1	0	0	0	0	0	0	3	51	33	40.2	11.2	13.6	181	240	11.8	19.3	13	25	34	42	62	74	7.9	8.9	80	99	3.8	6.5	105	163	145	147	3.1	3.9	0.9
0	0	1	4	10	4	2	4	1	1	0	0	0	1	0	0	0	0	0	0	0	2	81	22.1	28.5	6.8	8.9	328	414	8.5	13.8	10	11	22	23	27	32	7.6	8.2	113	114	0.8	1.2	63	102	142	143	3.7	4.4	0.7
0	1	3	3	9	5	2	2	0	0	0	0	0	0	0	0	0	0	0	0	0	2	51	31.9	32.4	10.2	10.5	55	60	2.9	3.3	6	6	26	26	12	12	7.4	7.4	113	113	0.8	0.8	91	91	142	142	3.4	3.4	1.3
1	0	2	3	3	1	1	1	0	0	0	0	0	1	0	0	0	0	0	0	0	10	90	28.4	32.3	9.8	11	208	258	1.3	7.1	10	14	16	21	10	11	7.4	8.3	104	107	0.6	1.1	119	135	130	134	3.5	4.3	1.8
1	0	1	3	7	4	2	1	0	1	0	0	0	0	0	0	0	0	0	0	0	5	72	28.2	34.1	8.6	10.6	184	242	11.5	14	14	19	17	18	44	47	10.9	11.3	100	102	1.5	1.7	107	148	133	136	5.3	5.5	2.5
0	1	1	4	14	6	4	4	1	1	0	0	0	0	0	0	0	0	0	0	0	3	55	39.6	41.6	12.9	14.6	53	60	3.6	11.5	15	20	13	15	17	37	7.1	8	107	112	1.9	2.5	65	104	131	141	3.5	4.8	4.7
1	0	1	4	14	6	4	4	0	0	0	0	0	0	1	0	0	0	0	0	0	5	67	25.8	31.5	8	10.4	167	195	26	36	20	27	11	16	112	138	6.8	8	95	104	3.9	4.9	150	331	129	133	4.8	6	1.2
0	1	1	4	14	6	5	3	0	0	0	0	0	0	0	0	0	0	0	0	0	3	68	34	39.6	11.1	13.2	137	197	14.5	20.4	15	17	23	24	17	17	8.4	8.4	100	102	1.1	1.1	107	135	137	137	4.6	4.9	1.8
1	0	1	3	3	1	1	1	0	2	0	1	0	1	0	0	0	0	0	0	0	10	47	26	41	8.7	13.1	71	115	22.6	38	17	23	13	18	38	43	7.1	7.8	93	100	1.6	2.2	60	81	126	133	2.8	4.4	3.8
0	0	1	4	15	6	5	4	1	0	0	0	0	0	0	0	0	0	0	0	0	2	86	26.9	41	9.6	14.3	123	136	10.3	15	8	13	24	27	18	19	8	8.1	105	112	0.8	0.9	189	189	138	143	3.5	4.4	1
0	1	1	7	15	6	5	4	2	0	0	0	0	0	0	0	0	0	0	0	0	2	88	19.4	31.7	6.6	10.9	100	130	5.6	13.5	11	13	22	23	13	16	7.9	8.4	101	105	0.7	0.8	69	150	131	134	3.9	4.6	1.9
0	0	4	3	15	5	0	3	0	0	0	0	0	0	0	0	0	0	0	0	0	3	57	38.8	38.8	12.5	12.5	217	217	10.6	10.6	12	12	27	27	15	15	9.4	9.4	107	107	0.5	0.5	99	99	141	141	4.6	4.6	0.7
1	0	4	2	3	1	1	1	0	0	0	0	0	0	0	0	0	0	0	0	0	9	72	27	30	8.6	9.6	133	165	12.9	17.6	13	18	25	29	105	110	7.7	8.3	98	101	2	2	213	316	139	139	2.9	3.9	1
0	1	1	2	15	6	0	4	0	0	0	0	0	0	0	0	0	0	0	0	0	2	48	36.3	36.7	12	12.3	156	158	11.7	12.6	9	10	24	26	16	16	9.4	9.5	107	109	0.8	0.9	109	109	138	139	3.7	4	1
1	0	1	5	15	5	0	4	2	0	0	0	0	0	0	0	0	0	0	0	0	4	83	28.2	30.7	9.3	10.3	334	425	15.6	18	13	15	23	24	12	14	8	8.4	103	106	0.6	0.8	102	132	137	140	3.5	4.4	1
0	0	2	4	3	1	1	1	0	0	0	0	0	0	0	0	0	0	0	1	0	4	60	22.8	26.8	6.5	7.1	27	70	6.8	8.5	14	15	28	29	19	22	10.5	10.8	100	101	3.6	4	83	144	139	139	4.1	4.5	1.1
0	0	4	3	10	6	1	3	1	1	0	0	0	1	0	0	0	0	0	0	0	11	79	44.3	51.2	13.7	14.9	58	100	16.2	18.4	19	19	24	24	35	45	7.3	7.7	107	110	1.6	2.2	146	205	146	149	3.8	4.4	2.4
0	1	1	3	3	1	1	1	0	0	0	0	0	0	0	0	0	0	0	0	0	7	41	37.3	42	12.3	14.2	226	261	5.2	8.9	12	12	24	26	11	13	8.6	8.6	104	108	1	1.3	80	112	137	140	3.6	4.2	0.6
0	1	1	5	12	5	4	3	1	0	0	0	0	0	0	0	0	0	0	0	0	15	63	36.9	43.4	12.9	15	135	224	15.6	21.5	11	20	17	23	17	19	6.3	7.8	108	115	0.5	1.1	110	259	138	146	3	4.3	2.8
1	1	1	2	13	6	4	3	0	0	0	0	0	0	0	0	0	0	0	0	0	5	73	34.7	38.9	11.9	13.2	320	361	13.4	16.1	11	15	27	31	33	35	8.3	8.6	98	99	1.2	1.2	95	103	135	137	3.8	4.6	2.6
0	1	1	5	12	5	3	4	0	0	0	0	0	1	0	0	0	0	0	0	0	3	61	24.2	32.4	7.6	10.1	150	196	6	9	20	26	18	25	49	103	7.9	8.3	94	98	5.8	10.9	124	164	139	142	4.4	6.6	3
0	0	1	2	13	6	4	3	0	0	0	1	0	0	0	0	0	0	0	0	0	4	60	28.6	28.6	9.6	9.6	386	386	15.2	15.2	10	11	28	29	13	14	6.9	6.9	95	95	0.4	0.4	88	107	130	131	3	4.1	1.8
1	1	4	7	3	1	1	1	0	0	0	0	0	0	0	0	0	0	0	0	0	3	62	34.8	37.1	10.9	11.6	45	66	12.4	17.7	19	19	17	21	89	103	8	8.9	101	106	1.7	1.9	211	259	130	140	5.3	7.3	2.8
0	0	1	3	15	6	5	4	0	1	1	0	0	1	0	0	0	0	0	0	0	4	73	35.3	35.3	11.3	11.3	284	284	3	3	16	16	21	21	14	14	7.6	7.6	103	103	0.6	0.6	159	159	136	136	4	4	1.2
1	1	1	10	15	1	0	1	0	1	0	0	0	0	0	0	0	0	0	0	0	3	70	42.7	45.2	13.1	14	156	158	20.6	20.9	15	17	25	27	56	71	8.2	8.3	94	96	1.3	2	281	287	136	138	4.9	5.3	1.7
0	0	1	4	3	1	1	1	0	0	0	0	0	0	0	0	0	0	0	0	0	5	55	37.6	41.3	13.4	14.4	112	119	9.1	10.8	14	18	22	25	46	50	8.1	11.1	107	114	2.2	2.8	127	148	143	147	4	5.5	1.1
0	0	4	5	13	5	4	4	0	1	0	0	0	1	0	0	0	0	0	0	0	3	78	30.6	36.3	10	11.5	175	224	13.9	17.2	11	17	20	25	17	29	8.5	9	103	105	0.9	1.3	193	260	140	141	3.2	4.6	1.3
0	1	1	8	7	5	1	1	0	0	0	0	0	0	0	0	0	0	0	0	0	4	53	25.5	33.2	8.8	9.8	176	346	6.3	15	18	39	6	18	43	104	6.6	7.7	88	100	5.7	11.3	82	797	128	133	3.2	4.5	2.2
0	0	1	2	14	6	5	3	0	0	2	0	0	0	1	0	0	0	0	0	0	2	90	22.6	39	9.9	9.9	208	208	9.1	9.1	19	19	21	21	81	83	8.7	8.7	107	107	1.8	1.9	147	147	142	142	4.5	4.6	2.9
0	1	1	3	4	1	2	1	0	0	0	0	0	0	0	0	0	0	0	0	0	3	64	35.3	36	11.6	11.7	195	201	15.2	15.3	8	9	38	39	13	15	8.5	8.9	101	103	0.6	0.7	120	139	144	146	3.9	4.1	0.9
0	1	1	6	15	6	5	4	0	0	0	0	0	0	0	0	0	0	0	0	0	2	34	22.4	24	7.5	7.9	28	29	5.2	5.4	14	17	16	17	20	21	6.8	7	97	100	1	1.3	90	116	130	131	4.8	5.2	1.7
0	1	1	9	7	5	1	1	0	1	1	0	0	1	0	0	0	0	0	1	0	9	55	30.8	50.8	10	16.9	116	318	27.6	34.9	13	17	17	19	28	33	6.7	7.9	106	110	1.6	2.1	179	330	135	137	4.3	5.9	1.6
0	0	1	3	13	6	4	3	0	1	0	0	0	0	0	0	0	0	0	0	0	4	73	24.5	26.6	7.9	8.5	205	209	7.3	8.1	11	13	24	25	43	44	7.5	8	105	108	1.1	1.4	69	104	138	139	4.3	4.8	0.6
0	1	1	2	7	5	1	1	2	1	2	0	0	1	0	0	0	0	0	0	0	14	54	25	30.1	8.4	10.3	186	259	15	20.1	12	15	22	23	59	62	7.9	9.2	100	103	2.9	3.6	82	167	132	135	4.4	5	1.3
0	0	1	3	14	6	5	3	1	0	0	0	0	1	0	1	0	0	0	0	0	4	52	27	28.6	9.4	10	404	418	8.7	13.7	12	12	27	30	4	8	7.8	8.9	91	98	0.6	0.7	111	176	130	133	2.8	4.2	0.8
0	0	1	2	13	6	4	3	0	0	0	0	0	0	0	0	0	0	0	0	0	5	68	25.8	31.5	8.6	10.4	133	204	12.8	21.4	10	13	21	22	24	24	8.3	8.3	106	112	1	1.4	111	111	136	138	4.9	5	1.3
1	1	1	2	6	4	1	1	0	0	0	0	0	0	0	0	0	0	0	0	0	12	50	35.3	40.2	11.1	13.2	388	424	15.2	23.9	14	21	10	15	10	13	7.5	8.3	114	120	1.6	1.9	94	120	143	146	3	3.8	1
1	0	1	2	13	6	4	3	1	0	0	0	0	0	0	0	0	0	0	0	0	5	85	35.2	38	11.1	11.8	312	332	10.9	11.6	18	22	20	27	37	37	8.8	8.8	96	97	1.4	1.4	100	104	134	137	3.9	4.6	1.1
0	0	1	7	15	5	0	3	0	0	0	0	0	0	0	0	0	0	0	0	0	5	55	35	39.3	11.3	12.7	29	42	4.3	5	4	7	33	34	28	30	7.4	7.5	105	110	0.5	0.6	114	219	143	150	4.2	4.5	1.9
0	1	1	8	14	6	5	3	0	0	0	0	0	0	0	0	0	0	0	0	1	2	80	19.5	23.3	6.5	7.9	69	119	50.6	82.5	18	23	13	21	94	129	7.5	8.8	99	102	3	4.8	118	160	136	139	4.3	5.1	1.6
0	1	1	4	15	6	5	4	0	0	0	0	0	0	0	0	0	0	0	0	0	2	52	20.9	28.9	6.8	7.8	411	528	38.1	43.9	11	32	18	27	30	42	5.9	7.9	83	104	1.1	1.9	82	349	129	139	3.4	4.1	0.8
0	0	4	5	7	4	1	2	5	1	0	1	0	1	0	0	0	0	0	0	0	14	61	24.7	28.8	7.7	9.3	180	234	5.2	7.2	13	18	22	25	23	26	7.5	7.7	97	101	1.5	1.6	194	244	135	141	3.9	4.3	0.8
0	0	1	8	3	1	1	1	0	1	1	0	0	0	1	0	0	0	0	0	0	13	45	32.4	40.1	10.6	13.4	184	364	2.3	12.6	10	20	13	19	42	50	6.7	8.3	112	120	1.7	2.3	175	229	141	144	3.3	4.6	3.6
0	0	2	2	14	6	5	3	0	0	0	0	0	0	0	0	0	0	0	0	0	2	90	38	38	11.7	11.7	216	216	3.9	3.9	11	13	21	30	17	28	6.4	9.5	102	114	0.6	1.1	105	126	140	140	4.6	5.6	1.3
0	0	1	9	15	5	0	3	0	1	0	0	0	0	0	0	0	0	0	0	0	6	76	23.1	24	7.3	8	36	43	85.9	129.8	21	22	12	13	83	85	7.6	7.8	108	111	2.9	3.1	94	116	138	140	4.4	4.6	4.9
0	0	1	2	15	6	5	4	0	1	0	0	0	0	1	0	0	0	0	0	0	3	82	26.5	38.6	8.8	12.1	187	204	8.1	9.5	11	15	23	24	23	25	7.8	8.3	104	108	1.1	1.2	101	178	136	139	4.7	4.9	2.2
0	1	1	8	3	1	1	1	2	0	0	0	0	0	0	0	0	0	0	0	0	4	84	27.5	31.4	8.7	10.2	186	257	21.6	33.2	12	15	20	23	25	26	9.2	10.2	107	113	0.9	1.1	73	131	139	141	4.7	5.8	1.9
0	0	1	7	11	6	1	4	0	0	0	0	0	0	1	0	0	0	0	0	0	3	69	23.6	26.1	7.8	8.4	133	145	5.7	6.5	11	14	31	35	59	69	8.1	8.1	97	104	2.4	4.2	118	151	139	144	3.9	4.8	0.7
0	0	4	5	13	6	4	3	0	0	0	0	0	0	0	0	0	0	0	0	0	4	59	24.5	26.7	9.3	9.6	119	122	5.5	6.3	10	11	29	30	10	10	8.8	8.8	102	103	0.5	0.6	105	151	138	139	3.6	3.9	1.2
0	0	1	6	14	6	5	3	0	1	0	0	0	0	0	0	0	0	0	0	0	2	34	23.2	28.4	8.3	9.8	134	182	11.5	14.3	14	15	22	24	23	24	7.4	7.4	79	86	1.1	1.3	80	86	118	122	2.7	4.5	2.3
1	1	4	3	15	1	0	1	1	0	0	0	0	0	0	0	0	0	0	0	0	2	42	19.1	47.5	6.4	15	52	182	11.6	29.3	18	25	9	17	18	32	6.3	7.6	110	116	1.7	2.1	137	376	138	145	3.2	6.5	3.1
1	1	4	3	3	1	1	1	0	1	1	0	0	0	1	0	0	0	0	1	0	8	85	38.7	43.3	12.6	13.8	112	140	8.2	18.8	13	20	11	16	27	36	6.4	7	107	111	1.7	2.3	161	384	135	143	3.7	5.7	2.2
0	0	4	9	10	5	2	3	0	0	0	0	0	1	0	0	0	0	0	0	0	3	78	22.7	31.2	6.8	9.3	216	371	2.9	13.5	13	18	20	25	98	120	9.2	11	93	105	3	4.5	107	356	132	142	5	8.2	1.4
0	1	2	4	13	6	4	3	1	1	0	0	0	1	0	0	0	0	0	0	0	3	74	26.4	28.4	8	8.5	341	412	9	9.6	11	13	22	23	44	59	8.3	8.6	123	124	1.2	1.4	214	273	155	159	3.7	4.2	2.6
0	1	1	2	15	6	5	4	0	0	0	0	0	0	0	0	0	1	0	0	0	7	34	39.5	46.2	12.9	14.7	363	575	18.6	43	14	25	16	21	20	23	7.5	9	90	98	1	1.7	147	198	128	132	4.7	5.1	2.9
1	1	1	6	3	1	1	1	0	0	0	0	0	0	0	0	0	0	0	0	0	4	72	36.8	41.8	11.3	12	266	283	19.9	22.8	12	12	20	22	36	39	7.9	8.1	108	110	1.7	1.7	72	88	137	138	3.9	4.5	1.5
0	1	2	3	9	5	1	3	0	0	0	0	0	0	0	0	0	0	0	0	0	13	89	26.4	29.2	9.1	9.9	193	217	6.7	8.8	10	12	25	31	19	23	8	8	103	110	1	1.1	119	234	141	141	4	4.9	1.5
0	1	2	6	3	1	1	1	0	0	0	0	0	1	0	0	0	0	0	0	0	8	78	41.9	45.4	14.8	15.8	171	202	1.9	9.4	16	19	22	25	10	12	8	8.6	94	98	0.8	0.8	143	164	131	133	3.4	4.7	1.2
0	1	1	3	15	6	5	4	0	0	0	0	0	0	0	0	0	0	0	0	0	2	64	23.2	38.6	7.4	12.8	137	255	16.4	48.6	14	15	21	23	12	17	9.4	9.4	104	109	0.8	0.8	129	178	136	139	3.9	5.1	2.6
0	0	1	11	13	6	4	3	0	1	0	0	0	1	0	0	0	0	0	0	0	8	63	27.1	30.2	8.9	9.7	17	44	2.7	18.9	11	21	9	16	80	99	6.8	8	111	115	2.2	3.5	53	137	138	144	4	5.3	1.2
0	0	1	4	10	6	1	3	1	0	0	0	0	0	0	0	0	0	0	0	0	13	78	31.7	37.7	10	12.4	358	385	6.4	7.9	10	10	32	32	17	18	7.3	7.3	105	105	0.6	0.7	130	130	143	143	4.3	4.3	0.5
0	1	1	2	7	4	1	2	0	0	0	0	0	0	0	0	0	0	0	0	0	8	75	31.7	46.2	10.7	15.6	161	361	5.4	10.5	9	23	19	21	19	29	6.9	9.9	109	124	1	1.7	146	363	146	149	3.4	4.1	1.7
0	0	1	4	3	1	1	1	0	0	0	0	0	0	0	0	0	0	0	0	0	15	47	42.6	42.7	13.8	13.9	294	319	5.5	5.6	13	16	28	31	9	9	9.3	9.6	103	103	0.6	0.7	106	124	143	143	3.7	3.9	1
1	1	1	7	13	5	5	2	0	1	0	0	0	1	0	0	0	0	0	0	0	6	55	38.1	39	11.8	12.2	40	74	26.6	29.8	10	12	23	24	42	45	8.2	8.3	115	117	1.2	1.3	209	230	144	149	3.8	4.2	1.8
0	1	4	4	11	5	4	2	0	0	0	0	0	0	0	0	0	0	0	0	0	2	55	27.3	40.3	9.2	13.1	82	131	19.3	27.5	13	20	14	22	11	12	8.1	8.2	106	109	1	1.2	34	83	137	137	3.5	3.9	5.1
0	0	1	7	3	1	1	1	1	0	0	0	0	0	0	0	0	0	0	0	0	3	81	24.3	29	7.8	9.3	127	163	12.2	21.7	14	15	21	22	22	23	8.4	8.5	108	111	1.1	1.2	130	130	139	143	3.8	4.7	1.4
0	1	1	3	9	5	1	3	0	0	0	0	0	0	0	0	0	0	0	0	0	18	53	35.4	41	11.2	12.5	88	200	7.7	11.9	14	15	21	21	21	27	8.6	8.9	105	111	1.6	1.7	119	154	135	141	4.7	6.1	1.5
0	1	3	10	10	5	2	3	0	0	0	0	0	1	0	0	0	1	0	0	1	13	45	21.9	30.3	7.1	10.2	140	156	5.5	6.1	21	25	22	25	105	117	6.2	8.7	102	105	8.7	9.8	154	182	143	147	4.4	4.8	0.7
0	1	1	3	14	6	4	4	0	1	0	0	0	1	0	0	0	0	0	0	0	5	60	25.4	37.4	11.2	11.2	148	148	3.6	3.6	11	14	22	25	13	16	6.8	7.5	105	106	1	1	108	113	137	138	3.7	4.1	1.4
1	0	4	5	12	5	4	3	1	1	0	0	0	0	0	0	0	0	0	0	0	2	90	38.7	43.6	12.5	13.3	61	94	13.1	20	11	16	29	31	42	57	8	8.7	101	105	1.3	1.5	138	158	140	142	4.1	4.7	1
1	1	1	3	15	6	5	4	0	1	0	0	0	1	0	0	0	0	0	0	0	2	73	18.8	21.4	6.1	7.1	138	156	3.8	7.7	22	23	15	16	112	118	7.8	8.4	100	102	3.9	4.5	149	171	138	140	3.9	4.7	2.1
1	1	1	3	4	1	2	1	2	2	0	0	0	1	1	0	0	0	0	0	0	8	90	21.2	24.4	6.5	7.2	193	207	8.8	10.9	17	21	21	24	66	67	8.6	8.8	96	97	2	2	138	240	133	135	3.2	3.6	1.4
0	1	1	2	8	5	2	1	0	0	0	0	0	0	0	0	0	0	0	0	0	12	58	30.8	39.2	10.8	13.3	135	185	6.8	9.2	16	23	20	26	7	9	7.6	8.3	100	104	0.6	0.8	135	185	139	144	2.9	3.8	1.9
0	1	1	6	14	6	5	3	0	1	0	0	0	0	0	0	0	0	0	0	0	2	57	41.1	45	13.4	14.5	148	167	7.9	12.8	13	16	33	37	11	16	7.6	8.4	82	92	0.5	1.1	151	201	128	138	2.7	4.4	1.1
0	1	1	6	4	1	1	2	0	0	0	0	0	0	0	0	0	0	0	0	0	9	87	28.4	33.9	9.5	11.3	87	178	9.4	20	10	11	24	25	16	16	9	9	109	112	0.9	1	156	156	139	144	4.1	4.1	1.8
1	0	1	3	3	1	1	1	0	0	0	0	0	0	0	0	0	0	0	0	0	12	89	36.6	39.3	11.8	13.1	212	292	11.8	17.3	15	22	21	22	33	38	8.4	8.4	100	108	0.9	1.3	96	129	140	140	4	4.3	1.7
0	1	3	3	10	4	2	4	0	0	0	0	0	0	0	0	0	0	0	0	0	4	76	39.3	48	12.6	14.9	337	449	9.2	11.6	23	30	17	20	224	240	9.2	10.4	122	135	9.6	10.5	106	372	161	176	4.9	6.1	3
0	1	1	2	14	6	4	4	0	1	0	0	0	1	0	0	0	0	0	0	0	2	81	38.4	45	13.7	15.7	142	180	10.5	11.2	11	17	21	25	16	17	7.2	8.5	103	117	0.9	1.1	100	154	140	145	3.8	4.5	1.5
0	1	1	5	15	6	5	4	2	0	1	0	0	0	0	0	0	0	0	0	0	2	48	24.5	28.6	7.9	9.3	87	225	5.7	11.7	10	12	21	24	25	35	7.7	7.9	106	107	1	1.5	97	153	139	141	4.6	4.6	2.9
0	0	1	3	15	6	5	4	1	0	0	0	0	0	0	0	0	0	0	0	0	5	70	24.1	32.7	7.9	10.9	119	163	11.6	16	14	14	21	22	11	11	8.9	8.9	104	109	0.5	0.7	103	103	135	135	4.5	4.5	1.1
0	1	1	2	3	1	1	1	0	0	0	0	0	0	0	0	0	0	0	0	0	22	66	33.8	37.9	10.8	12.1	143	217	1	1.8	13	30	19	27	37	48	6.8	6.9	90	106	1.1	2.5	66	92	133	136	4.6	5.6	2.9
1	1	1	8	3	1	1	1	0	0	0	0	1	1	0	0	0	0	0	0	0	33	64	23.2	23.2	8.2	8.2	15	33	4.6	4.6	13	13	25	25	69	69	8	8	110	111	1.5	1.5	177	177	144	145	4.8	5.2	1.6
1	1	1	6	3	1	1	1	0	0	0	0	0	0	0	0	0	0	0	0	0	3	55	40.4	49.2	13.8	16.4	277	348	23.5	35.3	14	22	12	16	22	26	7	8.1	110	118	0.8	1.2	131	327	140	143	3.3	4	3.3
0	1	1	3	15	6	5	4	0	0	0	0	0	0	0	0	0	0	0	0	0	2	66	34.4	46	11.4	15.7	130	170	1.6	16.6	14	19	22	27	25	31	7.6	8.2	101	108	1.2	1.5	109	201	140	143	3.5	3.8	0.9
1	1	4	4	3	1	1	1	1	1	0	0	0	0	0	0	0	0	0	0	0	14	54	29.4	30.3	9.7	9.9	322	327	4.9	5.9	16	20	30	34	23	26	8.5	9.1	87	92	0.8	0.8	123	340	133	138	3.8	4.3	0.8
1	1	4	3	4	1	2	1	0	1	0	2	1	1	0	0	0	0	0	0	0	6	47	23.6	34.4	7.5	11	36	81	11.8	16	12	20	18	23	25	42	7.3	9.2	95	106	0.7	1.2	103	154	137	142	4.5	5.2	1.8
0	0	4	3	15	1	0	1	1	0	0	0	0	0	0	0	0	0	0	0	0	2	80	24	34.8	7.8	11.5	155	186	4.1	10.8	11	11	21	23	16	16	7.6	8	107	112	0.8	1	154	154	136	140	3.7	4.6	0.6
0	0	2	3	15	6	5	4	0	0	0	0	0	0	0	0	0	0	0	0	0	3	23	34.9	35.5	9.8	10.4	334	413	7.5	8.4	13	13	23	24	6	14	8.9	8.9	105	108	0.7	0.8	101	105	138	140	3.5	4	0.9
1	1	1	3	15	6	5	4	1	0	0	0	0	0	0	0	0	0	0	0	0	2	75	21.6	24.7	6.6	7.9	152	185	2.9	4.9	10	17	20	21	35	46	7.4	8.5	100	112	1.6	2.4	141	205	133	139	4.5	4.6	1
0	1	1	4	15	6	5	4	0	0	1	0	0	0	0	0	0	0	0	0	0	2	62	20.8	27.2	6.5	8.7	135	159	6.7	11	12	14	28	28	27	35	7.5	8	94	99	1.1	1.4	120	129	132	135	3.5	3.7	1.5
1	0	1	2	13	4	5	3	0	1	0	0	0	0	0	0	0	0	0	0	0	5	71	44.7	44.7	15.2	15.2	243	243	13	13	17	17	30	30	36	36	10.3	10	96	96	0.9	0.9	137	137	138	138	4.9	4.9	1.8
0	1	4	3	15	6	5	4	0	0	0	0	0	0	0	0	0	0	0	0	0	2	62	29.7	37.1	9.4	11.9	207	242	80.5	104.8	12	12	19	21	48	48	7.9	8.8	113	115	3	3	87	113	142	142	3.6	4.3	1.2
0	0	1	4	13	6	4	3	1	1	0	0	0	1	1	0	0	0	0	0	0	2	60	28.2	30.2	8.7	9.3	220	241	6.9	10.1	12	14	20	22	16	19	7.5	7.9	99	101	1.2	1.3	68	108	133	135	3.6	4.1	0.7
1	1	1	10	7	3	2	2	0	0	0	0	0	0	0	0	0	0	0	0	0	5	61	30.5	41.9	10.2	14	15	47	0.4	0.8	9	10	26	28	37	37	6.6	7.3	118	120	0.9	0.9	144	187	151	152	3.7	4	2.3
0	0	1	3	12	3	5	3	3	0	0	0	0	0	0	0	0	0	0	0	0	3	70	20.7	28.3	6.9	9.3	134	181	16.1	19.5	9	9	22	23	20	21	8	8.8	109	114	0.6	0.8	129	129	136	136	4.9	4.9	1.7
0	0	4	5	15	1	0	1	0	0	0	0	0	0	0	0	0	0	0	0	0	2	70	33.9	36.9	10.7	11.5	331	355	10.3	11.5	18	22	22	25	55	60	8.9	9.1	95	98	8	8.6	170	180	133	138	3.2	6.3	0.9
0	1	3	3	11	6	2	3	0	0	0	0	0	0	0	0	0	0	0	0	0	4	40	23.8	32.8	9.2	11.6	163	222	10	21.4	10	11	25	26	12	13	8.6	9.1	106	108	0.8	0.9	139	214	137	139	4.4	5.9	1.9
0	0	3	4	15	6	5	4	0	0	0	0	0	0	0	0	0	0	0	0	0	2	68	47.2	47.8	15.8	15.9	116	128	4.6	5.2	13	13	26	28	14	16	9.6	9.9	100	101	0.6	0.7	149	168	140	141	4	4.5	1.5
0	0	1	4	14	6	5	3	1	0	0	0	0	0	0	0	0	0	0	0	0	3	49	29.6	29.9	9.9	9.9	266	266	7	7	11	11	25	25	10	10	7.1	7.1	111	111	0.5	0.5	98	98	143	143	3.6	3.6	0.9
1	1	1	3	14	6	5	3	1	1	0	0	0	0	0	0	0	0	0	0	0	2	60	27.2	32.8	9.1	11.4	392	528	18.1	24.8	16	19	19	24	39	60	7.3	9.6	92	100	2	2.1	289	453	126	131	4.5	5.8	1.9
0	1	2	2	7	4	1	2	0	0	0	0	0	0	0	0	0	0	0	0	0	8	62	31.3	37.7	10.4	12.8	113	168	13.5	21.2	13	24	17	24	18	24	7.1	9.1	92	111	1.7	2.1	106	411	132	141	3.6	4.5	1.8
0	0	1	2	7	5	1	1	0	0	0	0	0	0	0	0	0	0	0	0	0	5	83	28.9	39.1	9.7	12.7	290	317	11.2	21.3	14	20	21	22	9	11	8.7	8.7	98	100	0.7	0.8	152	216	133	135	3.4	4	1.3
0	1	1	3	14	6	5	3	4	0	0	0	0	0	0	0	0	0	0	0	0	3	82	25	32.6	8.5	11.5	158	220	4.7	6.8	11	14	21	25	12	19	8.4	8.4	105	110	0.7	1	84	136	138	140	4	4.4	1.2
0	0	2	2	14	6	5	3	1	1	0	0	0	0	0	0	0	0	0	0	0	5	59	29.5	33.2	9.9	11.3	319	377	19.6	23	9	11	23	27	12	13	8	9.5	100	110	0.9	1.1	86	141	136	142	3.9	4.8	1.3
0	0	1	8	15	6	5	4	1	1	0	0	0	1	0	0	0	0	0	0	0	2	61	28.1	36.4	9.4	11.9	216	311	10.7	23.5	12	20	20	27	18	21	8.8	9.3	101	109	0.8	0.8	92	341	138	142	3	4.6	1
0	1	1	3	3	1	1	1	1	0	0	0	0	0	0	0	0	0	0	0	0	6	72	24.6	26.5	7.9	8	319	325	14.6	14.9	13	15	19	21	48	50	8	8	99	101	2.1	2.4	103	103	135	135	4.2	4.2	0.5
0	1	1	4	13	6	4	3	0	1	0	0	0	0	0	0	0	0	0	1	0	8	32	22.8	31	7.5	10.2	135	249	20.3	36.9	11	17	22	25	18	26	8	8.9	85	95	0.7	1	145	257	124	135	3.5	3.9	2.3
0	1	1	4	14	6	5	3	1	0	0	0	0	0	0	0	0	0	0	0	0	3	63	22	27.9	6.9	8.1	134	146	9.5	11.6	14	18	18	20	101	108	9.9	10.3	96	102	3.6	3.9	173	329	132	135	4.8	5.6	0.9
1	0	4	3	12	4	5	1	1	0	0	0	0	0	0	0	0	0	0	0	0	11	87	26.8	32.5	8.7	11	172	189	12.7	15.3	9	15	21	26	14	17	8.7	10	110	123	0.6	0.8	169	173	142	155	3.6	4.3	3.1
1	1	2	4	15	6	0	3	2	2	0	0	0	1	0	0	0	0	0	0	0	7	67	31.6	34.4	10.8	11.5	227	232	11.4	12.5	17	34	11	20	24	26	8	8.7	87	96	1	1.3	174	346	124	128	3.7	4.6	1.4
0	1	3	2	14	6	5	3	0	0	0	0	0	0	0	0	0	0	0	0	0	4	44	45.8	47.5	15	15.8	175	228	12.4	19.1	14	19	16	20	13	18	8.8	9	109	112	1.5	3.4	115	156	141	142	4	4.5	2.2
0	0	2	4	12	6	2	4	0	0	0	0	0	0	0	0	0	0	0	0	0	5	51	39.7	39.7	12.7	12.7	227	227	11.7	11.7	12	13	26	28	16	18	9	9	105	105	1.8	1.8	83	85	139	142	3.7	4.1	0.7
0	1	2	4	15	6	5	4	0	1	0	1	0	1	0	0	0	0	0	1	0	3	68	20.5	24.1	6.1	7.8	108	152	7.2	9.5	15	26	6	14	83	89	7.4	7.5	101	107	4.6	5.5	65	113	128	136	5.4	6.1	1.6
1	0	1	6	15	6	5	4	0	0	0	0	0	0	0	0	0	0	0	0	0	5	82	23.5	24.6	7.8	8.1	30	43	7.7	8	13	16	23	26	20	26	8.3	8.5	95	99	1.4	1.6	106	201	135	136	3.4	3.6	1.9
0	0	2	3	8	5	1	2	0	0	1	0	0	0	0	0	0	0	0	0	0	3	77	38.1	38.1	11.1	11.1	245	245	15.1	15.1	10	10	43	43	17	17	8.8	9.2	98	98	0.7	0.7	166	166	147	147	3.9	3.9	1.3
0	0	1	8	3	1	1	1	0	0	0	0	0	0	0	0	0	0	0	0	0	3	90	27.6	30.3	9.7	9.9	127	166	6.5	9.5	7	7	22	26	12	13	6.4	6.7	110	113	0.7	0.7	92	92	138	139	4.5	5.3	0.7
0	1	1	2	13	5	4	4	0	0	0	0	0	1	0	0	0	0	0	0	0	3	58	26.1	34.6	9.1	11.3	34	83	4.1	9	10	36	10	24	30	35	8	9.3	89	110	0.7	1.1	71	115	130	140	3.8	4.5	1.3
0	1	2	5	15	6	5	4	1	0	0	0	0	0	0	0	0	0	0	0	0	2	72	23.2	24.9	7.4	8.1	252	268	10.3	14.1	11	12	25	25	36	38	8.2	8.4	98	101	1.8	2.3	80	155	134	138	4.5	5	1.6
0	0	1	2	11	5	4	2	0	1	0	0	0	1	0	0	0	0	0	0	0	4	90	30.7	33.2	9.5	10.3	155	161	11.9	13.3	12	15	23	23	36	40	8.1	8.2	106	111	1.1	1.1	130	176	140	141	4.2	4.6	0.9
0	1	1	6	15	6	5	4	0	1	0	0	0	1	0	0	0	0	0	0	0	4	64	29	36.8	9.5	12	128	159	13.2	19.4	13	16	23	24	22	24	8.4	8.4	97	99	1.5	1.5	138	138	135	135	4.6	4.9	1.2
1	0	2	2	3	1	1	1	0	0	0	0	0	0	0	0	0	0	0	0	0	6	58	31.5	35.5	9.9	11.2	111	119	17.2	18	14	17	19	21	11	12	9	9.6	109	111	0.7	0.9	117	130	141	143	3.3	4	1.4
0	1	1	10	14	6	4	4	0	1	0	0	0	0	0	0	0	0	0	0	0	3	65	26.5	36.5	8.4	11.6	130	212	13.4	27	14	25	14	19	15	42	8.2	9	104	111	1.1	2.8	170	368	143	148	4.1	5.4	3
0	0	1	2	8	5	1	2	0	1	0	0	0	0	0	0	0	0	0	0	0	10	47	29.3	30.8	9.9	10.4	68	76	6.1	8.8	15	15	21	24	5	5	6.1	7.2	103	108	0.4	0.5	84	116	138	140	2.9	4.3	1.1
1	0	1	2	8	5	1	2	0	0	0	0	0	1	0	0	0	0	0	0	0	2	73	28	28	9.5	9.5	128	128	13.5	13.5	12	12	24	24	16	16	7.9	7.9	105	105	0.4	0.4	104	104	138	138	3.2	3.2	1.5
0	1	1	2	14	6	5	3	0	0	0	0	0	0	0	0	0	0	0	0	0	3	71	22.6	28.1	7	9.1	119	173	5.4	7.3	19	20	26	27	39	48	8.1	8.3	98	104	4.2	5.1	94	251	140	146	4	4.1	2.6
0	1	4	4	14	6	4	4	0	0	0	0	0	0	0	0	0	0	0	0	0	2	51	22.5	27	7.3	8.6	47	69	6.8	7.7	9	18	16	22	18	22	7.1	7.8	111	116	0.6	0.8	143	237	141	144	3.9	4.4	2.1
0	1	4	5	6	1	1	4	0	0	0	0	0	1	0	0	0	0	0	0	0	13	60	45.7	49.7	14.9	15.9	114	139	9.4	16.6	12	15	17	20	20	29	7.2	8	106	106	1.8	2.4	165	388	132	136	4.1	5.3	1.3
0	1	1	3	12	5	5	1	0	0	1	0	0	0	0	0	0	0	0	0	0	16	77	36.2	39.2	12.1	13.4	151	175	9.1	14.7	13	15	21	25	20	24	8	8.6	98	104	0.9	1.2	145	217	132	138	4	4.4	1.2
0	0	1	2	9	4	4	1	0	1	0	0	0	0	0	0	0	0	0	0	0	2	80	30.6	31.7	9.8	10	543	581	14.6	15	18	19	21	23	19	22	9.3	9.3	105	106	0.9	1.1	112	128	140	142	4.5	4.6	0.8
0	0	1	4	10	5	2	3	1	0	2	0	0	0	0	0	0	0	0	0	0	6	54	20.1	22.6	7.2	8	34	50	7.3	10.3	23	27	17	20	30	30	7.6	7.8	85	87	0.9	1.1	77	117	124	127	3.7	4.2	2.6
0	0	2	5	9	5	2	2	0	1	0	1	0	0	0	0	0	0	0	0	0	2	93	36	36	11.3	11.3	130	130	10.7	10.7	11	17	26	29	36	55	8.1	8.1	121	126	0.9	1.6	145	201	154	164	3.6	5.5	1.4
0	0	1	3	15	6	5	4	0	0	0	0	0	0	0	0	0	0	0	0	0	2	73	20.8	29.8	6.5	8.7	153	185	10.9	12.2	8	12	21	22	10	10	7.8	7.8	103	110	0.7	0.8	103	103	136	136	4.5	4.5	1.5
0	1	1	3	9	6	1	2	0	1	0	0	0	0	0	0	0	0	0	0	0	3	64	28.5	28.6	10.4	10.6	91	94	4.4	5.1	7	8	30	32	19	22	7.5	8.5	104	108	0.7	0.7	130	147	140	141	3.6	4.3	1.6
0	1	1	3	12	5	4	3	4	0	0	0	0	0	0	0	0	0	0	0	0	4	65	32.3	38.5	11	13	189	235	12.2	23.7	12	12	22	23	12	12	8.3	7.7	111	112	1	1.1	126	126	140	140	5.2	5.4	2.2
0	1	2	9	3	1	1	1	0	1	0	0	0	0	0	0	0	0	0	0	0	5	82	30	37.5	9.5	11.7	138	212	12	20.4	8	35	16	33	22	29	8	10.8	96	106	1.6	2.2	78	797	140	147	4.1	9.5	1.7
0	0	4	5	7	5	1	1	0	1	0	0	0	0	0	0	0	0	0	0	0	2	79	31.8	35.7	10	11	286	324	6.6	7.3	14	14	27	27	17	19	10.1	10.1	95	95	1.4	1.6	181	181	132	132	4.3	4.3	1.5
0	1	1	2	13	6	4	3	1	1	0	0	0	0	0	0	0	0	0	0	0	2	60	27.4	31.5	9.9	11.3	152	169	8.6	13.3	10	16	27	33	15	17	7.2	7.8	85	99	0.9	1	48	113	130	136	2.4	3.9	1
0	0	1	2	9	5	1	3	0	1	0	0	0	0	0	0	0	0	0	0	0	4	90	34.8	37.9	10.8	11.8	232	279	11.5	12.8	9	14	40	45	30	33	8.2	8.7	96	97	0.5	0.6	115	196	146	147	3.6	6.2	2.1
0	1	1	5	14	6	5	3	1	0	0	0	0	1	0	0	0	0	0	0	0	6	73	16.9	24.8	4.9	8	148	218	5	7.4	12	17	29	34	103	111	7.9	8.8	98	101	3.1	3.3	59	97	142	146	3.6	6.2	1
0	0	1	2	9	5	1	3	0	1	0	0	0	1	0	0	0	0	0	0	0	3	83	34.2	37.7	10.6	11.7	130	143	4.8	5.5	12	14	26	28	27	29	6	7.1	108	116	1	1.1	152	209	143	152	3.4	5	1.4
0	1	1	6	13	6	4	3	0	1	0	0	0	0	0	0	0	0	0	0	0	2	54	42	43.1	14.1	14.2	199	201	15.9	18.4	12	16	24	29	18	24	7.8	8.6	106	109	1.2	1.3	128	167	142	144	4.5	5.7	1.1
0	1	4	3	14	6	4	4	0	0	0	0	0	0	0	0	0	0	0	0	0	4	85	38.2	40.8	12.6	13.3	134	155	7.4	8.4	14	18	24	27	20	22	8.2	8.2	100	100	1.4	1.5	103	356	136	137	4.7	5	2.6
0	0	2	2	14	6	4	4	0	1	0	0	0	0	0	0	0	0	0	0	0	2	81	26.1	36.1	8.5	12	190	247	9.1	10.2	14	15	22	29	14	18	8	8.7	99	106	0.8	1	123	140	134	139	3.7	4.7	1
1	1	1	5	7	3	1	3	1	0	0	0	0	0	0	0	0	0	0	0	0	11	68	25.6	29.3	8.8	9.7	209	210	13.3	15.2	14	23	17	22	68	111	8.4	8.9	102	112	1.6	3.3	168	342	138	143	4.7	6.5	0.9
0	1	1	2	13	6	4	3	0	1	0	0	0	0	0	0	0	0	0	0	0	4	90	36.1	40	11.6	13	135	147	5.9	8	12	15	21	25	16	19	9.2	9.5	101	105	1.1	1.1	122	227	136	141	4.2	7.1	0.9
0	0	1	2	11	6	1	4	0	0	0	0	0	0	0	0	0	0	0	0	0	6	84	29.3	38.3	9.5	11.9	282	668	5.9	12.3	11	13	22	29	30	36	7.1	8.9	100	109	1	1.2	107	149	136	141	3.6	4.4	1.6
0	0	1	2	7	5	1	1	0	0	0	0	0	0	0	0	0	0	0	0	0	3	90	36.5	36.5	11.7	11.7	182	182	14	14	16	16	26	26	20	20	9.2	9.2	104	104	0.7	0.7	137	137	142	142	3.9	3.9	1.8
0	1	4	2	13	6	4	3	0	1	0	1	0	0	0	0	0	0	0	0	0	2	70	28.5	29.7	8.7	9	167	198	10.3	13.7	14	15	27	30	19	25	8.2	9.2	100	101	1.3	1.6	117	150	139	141	3.4	3.9	1.3
0	1	3	7	15	6	5	4	0	0	0	0	0	0	0	0	0	0	0	0	0	5	81	25.1	29	8.2	9.4	164	236	9.8	14.1	13	18	16	19	47	54	6.7	7.7	106	107	2.2	2.4	203	275	132	133	5.4	6.5	1.3
0	1	1	8	3	1	1	1	1	0	0	0	0	0	0	0	0	0	0	0	0	3	70	25.2	35.9	8.3	12.3	133	162	15.5	18.3	10	12	24	24	13	14	8	8	103	106	0.6	0.7	111	111	139	139	4.3	4.3	1.4
0	1	1	4	14	5	5	4	1	0	0	0	0	0	0	0	0	0	0	0	0	2	76	32.8	38.3	11.1	13.1	103	130	12.5	19.6	8	16	23	31	15	19	7.4	7.6	101	108	0.8	1	105	188	139	143	3.4	4.3	1.5
0	1	1	6	13	6	4	3	0	0	0	0	0	1	0	0	0	0	0	0	0	2	59	38.3	51.8	12.8	16.5	84	125	8.9	15.4	25	38	14	19	112	124	7.6	8.6	101	106	5	6.8	136	317	145	150	2.7	3.6	2
1	0	1	2	9	6	1	2	0	0	0	0	0	1	0	0	0	0	0	0	0	43	84	32.1	33.2	10.9	11.4	459	478	15.7	21.5	13	15	24	25	19	23	8.5	8.6	97	100	1.2	1.3	114	125	131	133	3.4	4.5	0.9
0	0	4	5	14	6	5	3	2	0	0	0	0	0	0	0	0	0	0	0	0	2	77	31.4	33.3	11.2	11.2	233	233	9.4	9.4	14	14	22	22	13	13	7.8	7.8	106	106	1.1	1.1	145	145	138	138	3.6	3.6	1.3
0	0	4	6	14	6	5	3	2	0	0	0	0	0	0	0	0	0	0	0	0	3	69	22.5	37.8	6.7	12.4	287	478	8.4	19.8	12	18	26	29	9	11	8.9	9.4	102	103	0.8	0.9	103	112	140	144	3.1	3.4	0.9
0	1	1	3	13	6	4	3	1	0	0	0	0	0	0	0	0	0	0	0	0	5	72	24.6	28.8	8	9.7	105	201	13.2	17.1	11	14	22	23	15	21	8.2	8.2	107	110	0.7	1.3	92	165	138	140	4	4.7	1.6
0	0	1	3	9	4	1	4	0	1	0	1	0	1	0	0	0	0	0	0	0	8	87	27.2	38.9	8.3	12	326	425	11.5	16.4	12	18	16	21	21	22	7.6	8.6	114	116	2.1	2.3	91	144	147	149	3.5	4.2	0.8
0	0	1	6	15	6	5	4	1	0	0	0	0	1	0	0	0	0	0	0	0	2	62	30.2	35.4	10.3	11.8	130	177	13.1	14.4	12	17	15	20	11	13	7.4	8.8	113	116	0.9	1.3	165	225	140	143	4.1	5.3	1.4
0	1	4	3	14	6	4	4	0	0	0	0	0	0	0	0	0	0	0	0	0	4	80	30	33	10	10.4	135	150	6.8	7.4	14	16	21	23	36	37	8	8.1	112	113	1.4	1.4	104	106	143	145	5	5.9	1.5
1	1	1	2	8	6	1	1	0	0	0	0	0	0	0	0	0	0	0	0	0	5	55	22.8	28.8	8.1	9.9	149	175	7.1	7.2	10	15	13	17	19	21	7.9	8.3	105	110	1.1	1.3	83	88	129	133	4.2	4.4	0.8
0	0	1	3	14	6	4	4	1	1	0	0	0	0	0	0	0	0	0	0	0	4	73	34	39.3	11	12.6	241	323	23.9	34.6	18	21	23	29	27	40	7.7	9.2	83	94	0.9	1.2	138	246	128	131	4.2	5	1.3
1	0	1	3	3	1	1	1	0	0	0	0	0	0	0	0	0	0	0	0	0	2	69	32.8	33.6	10.3	10.6	305	339	19.2	21.1	20	29	16	23	110	124	9	9.5	105	109	3.7	4.3	168	294	145	148	4.5	5.2	2.2
0	1	4	8	3	1	1	1	4	0	0	0	0	0	0	0	0	0	0	0	0	5	76	27.5	36.4	9.3	12.9	118	133	9.9	13.4	13	17	23	26	14	15	7.7	8.3	103	106	0.8	0.9	133	133	138	142	3.6	4.1	1.6
0	1	1	2	14	6	5	3	0	2	0	0	0	0	0	0	0	0	0	0	0	3	61	29.4	29.4	9.4	9.4	603	603	15	15	11	15	18	19	11	13	7	7.1	113	114	0.9	1	129	137	139	143	4	4.4	0.7
0	0	1	2	10	1	5	3	0	1	0	0	0	0	0	0	0	0	0	0	0	5	62	34.1	41.1	10.6	12.8	393	503	22	29.4	18	20	21	22	20	21	8.7	9.1	99	99	0.7	0.8	193	198	135	136	3.8	4.3	2.3
1	0	1	2	7	1	2	4	0	0	0	0	0	0	0	0	0	0	0	0	0	5	90	23.2	40.1	7	12.6	296	391	11.7	15.9	11	16	22	24	18	23	8.8	9.7	104	110	0.7	0.8	148	258	138	143	3.3	4.5	1.2
0	1	1	2	13	6	5	2	3	0	0	0	0	0	0	0	0	0	0	0	0	2	61	28.5	33.7	9.7	11.6	122	130	9.8	14.7	9	13	21	24	14	15	8	8.5	107	112	0.9	1	120	120	137	140	4.4	4.5	1.5
0	1	4	8	14	6	4	4	0	1	0	0	0	1	0	0	0	0	0	0	0	5	60	23.6	30.2	7.6	9.8	19	29	1.5	3.7	13	14	19	22	48	52	8.5	8.8	104	109	8.3	8.4	91	139	136	138	3.3	3.9	1.9
0	1	1	2	13	6	4	3	0	0	0	0	0	0	0	0	0	0	0	0	0	2	77	21.1	34.6	6.6	10.3	366	776	23	39.5	10	28	26	29	74	91	8.1	10.4	108	118	2.6	4.3	95	219	147	158	3.2	4.4	2.7
0	0	1	8	8	4	1	3	0	0	0	0	0	0	0	0	0	0	0	0	0	7	59	27.4	29.5	8.9	9.9	90	124	9	10.5	18	19	16	17	81	86	8.3	8.9	100	100	3.9	4.5	114	143	129	129	5.5	5.8	1.4
1	1	1	3	11	5	3	3	1	1	0	0	0	0	0	0	0	0	0	0	0	3	90	33.5	34.4	10.9	10.9	113	115	20.9	22.5	8	16	16	21	36	52	6.1	7.9	89	110	1.7	1.9	241	1029	110	141	3.1	4.1	0.7
0	1	1	4	15	6	5	4	1	0	0	0	0	0	0	0	0	0	0	0	0	2	70	25.7	29.2	8.7	9.3	83	119	11.7	15.1	11	12	20	21	12	12	8	8.1	105	105	0.7	0.7	82	176	136	138	4	7	1.7
0	1	1	2	14	6	5	3	1	0	1	0	0	0	0	0	0	0	0	0	0	2	73	27.9	29.4	8.7	9.2	279	349	25.4	25.5	15	15	20	20	11	11	7	7	100	100	0.7	0.7	133	133	131	131	4.2	4.2	1.4
0	1	1	2	6	4	1	1	0	0	0	0	0	0	0	0	0	0	0	0	0	7	42	40.7	41	14.6	15.5	186	208	20.1	20.9	12	18	24	25	19	22	8	9	85	102	1.3	1.5	116	140	124	141	2.8	3.4	1.5
0	1	1	2	15	6	5	4	0	1	0	0	1	0	0	0	0	0	0	0	0	2	68	36.5	37.8	11.4	11.5	143	155	10.9	11.7	15	16	23	23	12	13	8.5	8.5	100	101	0.8	0.8	114	135	139	139	3.9	4.6	2.2
0	1	1	3	13	6	4	3	1	0	0	0	0	0	0	0	0	0	0	0	0	3	82	21.7	32.4	6.8	10.1	71	110	10.7	14.7	11	15	19	20	14	18	8.2	8.2	107	112	0.7	0.8	110	110	136	139	4.3	4.8	1.3
0	1	4	3	14	6	5	3	0	0	0	0	0	0	0	0	0	0	0	0	0	3	45	31.3	44.1	11	15	97	173	7.2	20.3	12	30	12	26	12	14	7.3	7.6	105	108	0.9	1.1	116	127	139	143	4.7	5.4	1.1
1	1	1	9	4	1	1	2	0	0	0	0	0	0	0	0	0	0	0	0	1	67	76	34.4	49.9	11.4	16.2	137	248	13.1	19.8	17	24	10	17	60	70	3.1	4.9	100	105	4.4	5.6	134	172	129	132	4.4	6.4	1.2
0	1	2	3	14	6	4	4	0	0	0	0	0	0	0	0	0	0	0	0	0	3	67	34.5	43.3	11.9	15.3	183	262	9.5	9.9	12	16	20	23	8	11	7.9	8.4	102	115	1	1.2	143	327	141	148	3.4	3.7	2.2
0	0	4	6	12	6	2	4	0	0	0	0	0	0	0	0	0	0	0	0	1	11	62	24.1	24.3	8.1	8.2	139	155	10.1	12.3	21	25	19	26	97	118	9.6	10.4	94	95	5.7	7.2	110	261	133	137	4.6	5.5	0.9
0	0	2	4	15	6	5	4	1	1	0	0	0	1	0	0	0	0	0	0	0	2	37	23.6	31.2	7.6	9.9	169	267	2.8	13	9	16	17	19	6	13	5.8	8.5	102	120	0.5	0.9	31	322	132	146	3	4.9	1
0	1	1	8	13	6	4	3	1	0	0	0	0	0	0	0	0	0	0	0	0	2	66	22	24.6	7.1	8.2	42	60	7.8	10.6	8	9	19	21	16	23	6.7	7.1	113	115	0.6	0.6	110	138	141	144	3.7	4.2	1.6
0	1	1	8	14	6	5	3	1	0	0	0	0	0	0	0	0	0	0	0	0	3	78	24	34.7	7.5	11	79	158	5	9.5	11	12	19	23	11	20	7.9	8	103	109	0.7	0.9	83	83	135	137	3.9	4	1.1
1	1	1	2	15	6	5	4	0	0	0	0	0	0	0	0	0	0	0	0	0	5	39	20	25.7	6.6	8	316	431	14.1	18.8	15	17	23	24	10	11	7.4	8.3	98	99	0.7	0.7	125	166	134	134	3.9	4.1	1.9
0	1	1	5	6	4	1	1	4	0	0	0	0	0	0	0	0	0	0	0	0	7	85	29.1	32.6	9.5	10.7	121	141	31.6	40.4	13	14	19	22	36	38	7.6	7.9	110	111	1	1.2	150	163	140	141	4.3	4.4	1.2
0	1	1	9	3	1	1	1	0	0	0	0	0	1	0	0	0	0	0	0	0	4	26	46.6	54.1	15.5	17.9	174	182	4.3	17.2	11	15	21	24	14	23	7.3	7.9	106	110	1.3	1.8	114	141	135	140	3.6	5.3	1.5
0	0	2	3	14	6	5	3	2	0	0	0	0	0	0	0	0	0	0	0	0	2	71	25.1	30.6	8.7	9.5	139	155	6.6	14.2	11	12	23	25	8	9	8.8	8.9	105	110	0.4	0.5	138	138	136	141	3.5	4.8	0.8
0	1	4	7	7	4	1	2	0	1	0	0	0	1	0	0	0	0	0	0	0	4	82	19.7	23.2	6.6	7.9	47	52	12.1	17.3	15	20	15	20	121	136	7.9	8.7	93	99	3.7	4.3	124	177	128	135	4.6	5.2	1.5
0	1	1	3	15	6	5	4	0	0	0	1	0	0	0	0	0	0	0	0	0	3	90	33.9	35.5	11.5	12.5	112	126	6.2	7.3	16	19	21	24	50	56	8.3	9.2	96	103	1.8	2	125	212	135	139	3.2	3.6	1.8
0	1	1	2	14	6	4	4	3	0	0	0	0	0	0	0	0	0	0	0	0	2	85	22.5	28.2	7.6	9.8	134	215	9.4	12.7	10	10	22	24	22	23	7.7	7.4	112	113	0.9	1	93	182	140	140	4.3	4.5	1
1	0	1	4	14	6	4	4	0	1	2	0	0	1	1	0	0	1	1	0	0	7	93	32	41.9	10.1	13.3	475	615	5.2	8.5	8	16	22	24	27	33	6.6	6.8	103	106	0.5	0.6	92	184	132	140	3.1	4.5	0.8
0	0	1	3	13	6	4	3	0	0	0	0	0	0	0	0	0	0	0	0	0	2	90	31	34.7	11.2	11.4	179	234	7.6	11.3	9	12	26	28	5	16	7.7	8	109	110	0.5	0.7	101	106	142	145	3.1	3.5	1.1
0	1	1	3	13	6	4	3	0	1	0	1	0	1	0	0	0	0	0	0	0	2	90	29	32	9.6	10.4	154	160	6	9.1	15	22	19	25	69	73	8.5	8.9	100	101	1.9	2.1	97	148	140	141	4.6	5.1	2.4
0	1	1	5	15	6	0	4	0	0	0	0	0	0	0	0	0	0	0	0	0	5	61	36.1	38.7	11.8	13.3	190	254	11	15.6	11	26	14	24	18	22	7.3	7.8	101	112	0.8	1.1	170	433	138	140	2.2	4.9	1
0	1	1	2	15	6	5	4	0	0	0	0	0	0	0	0	0	0	0	0	0	2	90	27	28.1	9.4	9.5	212	229	5.7	7.2	12	15	24	24	36	38	9	8.2	103	107	1.9	2	114	118	138	139	4	4	0.9
0	1	1	7	10	6	2	2	0	1	0	0	0	1	0	0	0	0	0	0	0	6	65	18.8	25.4	6.7	9	88	155	12.4	17.6	20	24	14	19	60	61	7.6	8.9	85	90	2.1	3.9	139	163	119	127	3.4	5.5	3.7
0	1	1	3	12	5	4	2	1	0	0	0	0	0	0	0	0	0	0	0	0	12	70	41.1	45.7	13.4	14.9	213	278	15.7	28.8	12	16	19	21	17	23	8.1	9.1	109	111	0.7	0.9	132	185	142	146	4.1	5.6	1.6
0	0	4	9	13	6	4	3	1	0	0	0	0	1	1	0	0	0	0	0	0	2	57	22.7	23	7.2	7.4	54	58	9.1	9.9	26	31	20	21	97	102	7.3	8	92	94	6.1	7.3	84	160	140	143	4.5	5.2	1.4
0	1	4	2	7	4	1	2	0	0	0	0	0	0	0	0	0	0	0	0	0	4	65	22.3	29.3	7.1	10.5	206	324	8.7	18.8	11	14	28	29	12	13	8.1	8.4	101	106	0.8	0.9	212	250	139	142	3.7	4.4	1.7
0	0	1	4	15	6	5	4	0	0	0	0	0	0	0	0	0	0	0	0	0	2	79	25.9	28.5	9.2	10.2	13	21	1.1	1.2	13	14	22	24	24	28	8.9	8.9	103	104	0.8	0.9	169	217	136	137	3.4	3.7	1.2
0	1	4	6	3	1	1	1	0	0	0	0	0	0	0	0	0	0	0	0	0	35	67	24.6	27.5	8.1	8.7	239	254	11.6	15.3	15	23	12	17	34	55	7.1	8.3	101	108	2.1	2.5	140	173	131	135	4.3	6.3	1
0	0	4	4	6	4	1	1	0	1	0	0	0	0	0	0	0	0	0	0	0	2	72	23.5	28.7	9.2	9.2	136	136	15.4	15.4	10	10	21	21	32	32	7.3	7.3	117	117	1	1	186	186	144	144	4.3	4.3	1.6
0	0	4	4	10	5	2	3	0	0	0	0	0	0	1	0	0	0	0	0	0	3	78	33.1	35.2	10.1	11	70	75	2.8	3.9	7	14	23	26	14	23	7.4	8.3	106	110	0.3	0.5	57	143	139	143	3.2	3.9	1.3
0	0	2	8	9	5	1	3	0	1	0	0	0	1	0	0	0	0	0	0	0	6	88	25	26.4	8.3	8.7	97	109	6.5	11.8	18	23	14	17	95	100	8.2	8.6	104	108	4	4.1	109	205	134	138	4.9	5.8	0.8
1	0	1	2	3	1	1	1	1	0	0	0	0	0	0	0	0	0	0	0	0	11	77	23.9	32.6	8.2	10.9	160	202	10.7	13.8	11	13	21	22	17	20	7.5	8	113	117	0.8	0.9	112	122	142	145	4.7	5.1	1.7
0	0	4	8	3	1	1	1	0	0	0	0	0	0	0	0	0	0	0	0	0	2	70	22.1	29.4	7	9.6	92	305	9.7	15.7	12	17	26	31	22	37	8.9	8.9	96	107	0.7	1	99	188	136	139	4.7	5.2	1.4
0	1	1	6	15	6	5	4	2	0	0	0	0	0	0	0	0	0	0	0	0	2	45	34.5	45	11.8	15.6	289	335	14.2	20.3	8	15	22	24	15	18	8.9	8.9	99	108	0.4	0.7	154	172	132	136	4.3	4.5	1.8
0	1	4	4	14	6	5	3	0	0	0	0	0	0	0	1	0	0	0	0	0	2	59	38.2	38.2	13	13	172	172	13.3	13.3	11	14	24	25	33	33	8.3	8.9	101	107	1.4	1.6	146	178	139	143	4.1	4.4	1.4
0	1	1	6	3	1	1	1	1	0	0	0	0	0	0	0	0	0	0	0	0	15	73	23.3	38.1	8.1	12.3	87	152	5.1	15.2	15	24	16	23	18	25	7.8	8.2	105	109	1.8	2.7	118	169	139	143	4.4	5.9	1.6
0	1	2	2	5	1	1	3	0	0	0	0	0	0	0	0	0	0	0	0	0	15	43	34.9	37.4	11.3	11.9	254	260	4	4.8	19	19	19	23	31	35	8.8	9	102	108	1.6	1.8	123	126	140	142	4.3	4.3	0.9
0	1	4	7	15	6	5	4	0	0	0	0	0	0	0	0	0	0	0	0	0	3	82	37.6	39.2	13.3	14	90	104	12.3	18.2	9	12	22	23	21	21	8	8	108	113	0.6	0.6	100	118	143	144	4.3	4.5	1.1
0	1	2	4	15	6	5	4	0	1	0	0	0	0	0	0	0	0	0	1	0	3	84	27.5	34.8	8.1	10.2	122	169	72.6	129.4	14	14	26	28	28	29	7.5	7.9	110	114	0.9	1	89	100	148	150	3.8	4.2	1.8
1	0	1	2	11	5	4	2	0	0	0	0	0	0	0	0	0	0	0	0	0	2	76	36.9	41.4	11.9	13.1	146	193	8.2	9.3	18	23	13	15	32	37	9.4	10	98	101	0.7	1	71	125	133	135	4.1	5	2.4
0	0	1	2	13	6	4	3	0	0	0	0	0	0	0	0	0	0	0	0	0	4	90	36	36	11.5	11.5	218	218	12.8	12.8	19	19	24	24	25	25	8.4	8.4	103	103	1.5	1.5	129	129	142	142	4.3	4.3	2.2
1	0	4	2	15	3	0	1	0	1	0	0	0	0	0	0	0	0	0	0	0	2	68	28.1	33.1	9.7	11.3	123	234	8.2	13	14	18	17	21	7	20	7.7	8.5	97	115	0.6	0.8	119	232	127	143	3.3	3.9	1.2
0	0	4	4	14	6	5	3	0	1	0	0	0	0	0	0	0	0	0	0	0	6	59	42	51.3	12.8	15.5	232	270	15.6	23.4	10	18	22	24	3	9	8.5	9.3	101	108	0.3	0.6	135	175	138	144	3.5	5	2
0	1	1	3	15	6	5	4	1	0	0	0	0	0	0	0	0	0	0	0	0	2	72	23.6	28.8	9.4	9.5	107	152	23.4	27.7	12	12	23	27	19	19	8.1	8.1	109	112	1.1	1.1	133	133	140	140	4.1	4.1	1.2
0	0	1	3	14	6	4	4	0	0	0	0	0	0	0	0	0	0	0	0	0	2	60	26.8	26.8	8.3	8.3	260	260	8.9	8.9	16	19	17	19	30	32	9.9	10.3	107	111	1	1.2	129	149	139	142	3.8	4.1	2
0	0	1	9	13	6	4	3	0	1	0	0	0	1	0	0	0	0	0	0	0	5	78	30.1	33.4	10	10.8	346	375	13.4	17.3	20	24	26	28	106	107	8.3	8.8	90	96	4.3	5.2	168	181	138	139	3.8	3.8	1.5
0	0	1	3	8	5	1	2	0	1	0	0	0	0	0	0	0	0	0	0	0	12	21	35.6	40.7	12.1	13.8	179	233	4	4	12	15	23	26	5	6	7.7	8.1	105	106	0.7	0.7	98	101	139	140	3.8	3.9	0.9
0	1	1	3	14	6	5	3	1	2	0	0	0	0	0	0	0	0	0	0	0	3	67	30.6	42.9	10.8	14.5	234	253	9.8	30.5	12	15	23	26	20	23	8	9.2	100	106	0.9	0.9	142	181	137	137	4.3	4.5	1.2
0	0	4	6	14	6	5	3	1	1	0	0	0	1	0	0	0	0	0	0	0	6	61	36.4	40.6	11.1	12.4	190	249	19.2	22.7	16	20	19	20	45	57	8.2	8.7	102	105	2	3.9	155	388	135	136	4.9	6	1.4
0	0	2	3	6	4	1	1	0	0	0	0	0	0	0	0	0	0	0	0	0	12	86	13	16.1	4.2	5.1	149	152	6.9	12.3	17	18	19	21	78	83	8.1	9.4	106	107	1.4	1.5	85	99	144	144	4.1	4.3	1.9
0	1	1	3	8	5	1	2	1	0	0	0	0	0	0	0	0	0	0	0	0	3	76	48.5	48.5	15.1	15.1	280	280	10.8	10.8	9	11	31	33	24	27	8.4	8.4	98	100	1.1	1.1	141	145	140	142	5.8	5.9	1.2
0	0	1	3	9	5	1	3	0	0	1	0	0	0	1	0	0	0	0	0	0	15	85	26.1	33.5	7.7	9.5	207	331	1.4	5.4	8	20	13	16	25	30	6.5	7.2	110	118	0.7	1.4	70	139	138	142	4.2	5.6	2.4
0	1	2	2	7	5	1	1	0	0	0	0	0	0	0	0	0	0	0	0	0	5	41	38.2	41.2	12.7	13.5	149	179	5.7	10.6	12	14	19	19	5	7	7.5	7.7	109	112	0.6	0.8	90	114	138	140	3	3.7	1.6
0	0	2	2	9	5	2	2	1	0	0	1	0	0	0	0	0	0	0	0	0	3	80	37.7	41.7	10.9	11.7	63	159	8.8	10	8	13	33	37	16	27	8.3	8.7	91	100	0.6	1.1	126	236	136	145	3.3	7.5	0.6
0	1	1	2	13	6	4	3	0	1	0	0	0	0	0	0	0	0	0	0	0	3	67	26.5	28	9.3	9.6	182	209	9.8	15.5	9	11	29	31	12	14	8	8	95	97	0.5	0.7	220	275	131	133	3.3	3.9	1.5
0	1	4	6	11	6	2	3	0	0	0	0	0	0	0	0	0	0	0	0	0	6	65	31.6	35.6	10.3	11.6	280	324	8.5	10.3	17	21	17	22	29	37	8.6	9.4	98	102	1.9	2.5	122	160	134	141	3.3	4.7	1
0	1	1	4	14	6	5	3	1	0	0	0	0	0	0	0	0	0	0	0	0	2	61	28.1	32.2	9.6	10.9	154	190	10.9	20.2	11	12	19	23	18	20	8.1	9.5	104	108	0.9	1.1	127	142	136	139	4.3	4.7	0.7
1	0	1	4	3	1	1	1	0	0	0	0	0	0	0	0	0	0	0	0	0	12	48	21.7	28.3	7.4	9.2	113	150	6.4	9.2	5	9	40	45	39	42	8.3	8.7	96	99	0.6	0.8	106	137	142	144	3.7	5	1.1
0	1	1	4	7	5	1	1	0	1	0	0	0	0	0	0	0	0	0	0	0	10	69	39.5	42.2	14.3	14.8	197	215	14.6	15.2	10	19	23	27	6	13	7.3	8.9	102	113	0.6	0.8	115	158	140	146	2.9	4	0.8
0	0	2	3	10	5	1	4	0	0	0	0	0	0	0	0	0	0	0	0	0	4	90	33.8	41.5	11.3	14.1	124	135	3.6	21	11	15	24	28	25	28	8.1	9.3	100	109	0.7	1	84	131	138	140	4.1	4.3	0.8
0	1	2	6	15	6	5	4	0	1	0	0	0	1	0	0	0	0	0	0	0	3	66	16.6	29.8	5.9	10.4	36	60	6.7	15.8	13	24	16	23	13	16	7.6	9.4	99	109	1.1	1.3	130	317	136	144	4	4.9	2.3
0	1	1	3	13	6	4	3	2	0	0	0	0	0	0	0	0	0	0	0	0	4	68	23.3	24.7	6.9	7.3	406	430	16.6	22.4	10	12	25	30	16	19	7.2	7.4	99	103	0.5	0.5	55	130	131	138	3.8	4.6	1.6
0	1	4	2	14	6	5	3	1	1	0	0	0	0	0	0	0	0	0	0	0	3	25	23.2	38	8.2	12.8	67	292	7.8	29.6	7	20	17	25	13	19	6.9	7.8	108	117	0.9	1.1	121	174	139	144	4.2	5.5	1.1
0	1	1	4	15	1	0	1	1	0	0	0	0	0	0	0	0	0	0	0	0	2	79	26	31.8	9	10.9	137	201	8.7	12.7	13	14	22	23	22	23	8.9	8.9	109	114	1.3	1.3	113	113	139	144	4.5	5	1.9
0	1	2	6	11	4	4	3	0	1	0	0	0	0	0	0	0	0	0	0	0	4	88	49.3	53.7	15.2	17.1	269	282	9.4	14	15	20	32	36	69	82	8.8	9.8	93	104	1.8	1.9	161	483	140	150	3.6	5.8	2
0	0	4	6	14	6	5	3	2	1	0	0	0	0	0	0	0	0	0	1	0	2	47	29.3	37.5	9.4	12.3	94	120	6.7	9.4	10	18	16	21	9	12	7.1	8.1	97	106	0.7	1	109	131	131	137	3.6	4	1.1
0	1	1	4	13	6	4	3	0	1	0	0	0	1	0	0	0	0	0	0	0	3	71	39.5	39.5	13.8	13.8	213	213	22.8	22.8	19	19	21	21	15	15	8.9	8.9	99	99	0.9	0.9	302	302	135	135	4.4	4.4	2
0	0	1	2	14	6	4	4	1	0	0	0	0	0	0	0	0	0	0	0	0	2	67	28.7	33.7	9.7	11.9	246	326	5.7	18.4	15	17	18	20	11	19	7.9	9.3	111	118	0.8	1	146	248	142	148	3.5	5.2	3.3
0	1	1	2	3	1	1	1	0	1	1	0	0	0	0	0	0	0	0	0	0	33	63	29	41.2	8.8	14	108	246	6.4	10.3	13	24	20	25	51	61	8.4	8.7	97	106	1.3	1.8	185	283	134	141	4	6.5	1.2
0	1	3	10	3	1	1	1	1	0	0	0	0	0	0	0	0	0	0	0	0	2	61	22.6	35.1	7.9	11.9	98	178	10.2	20.5	10	11	22	26	13	17	8.3	8.3	105	110	0.9	0.9	95	95	136	138	4.5	4.6	1.3
1	0	4	2	15	4	0	1	0	1	0	0	0	0	0	0	0	0	0	0	0	4	71	29.2	32.7	9	10.2	252	254	14.9	16	16	18	20	20	13	19	10.2	10.2	109	114	0.9	1.2	159	212	143	146	4	4.3	2.1
0	1	4	9	9	5	2	2	0	1	0	0	0	1	0	0	0	0	0	0	0	3	59	28.1	34.5	9.6	11.5	37	51	10.8	17.8	22	36	12	21	33	103	7.5	8.9	85	92	5.4	13	69	125	128	132	3.3	4.7	0.8
0	1	1	2	10	5	2	3	1	0	0	0	0	0	0	0	0	0	0	0	0	3	65	29.2	29.7	10	10.2	178	200	9.1	9.4	10	11	25	25	14	16	7.4	7.2	105	110	0.8	0.8	106	106	137	141	4	4.3	2.4
0	1	4	3	15	6	5	4	0	0	0	0	0	0	0	0	0	0	0	0	0	2	88	36.8	40.7	12.4	13.7	165	187	17.6	24.6	15	19	22	25	40	43	9	9.5	96	100	1.9	2	113	162	137	140	4.6	5.2	1.8
0	1	1	2	13	5	4	4	0	2	0	0	0	1	0	0	0	0	0	0	0	2	86	32.4	36.7	9.9	11.4	166	204	13.9	21	14	15	23	24	16	18	8.2	8.5	102	104	0.8	0.9	114	146	136	138	3.6	3.9	1.8
0	0	1	2	10	6	1	3	1	0	0	0	0	0	0	0	0	0	0	0	0	2	84	26.5	33	8.6	10.6	136	166	22.9	26.3	11	12	22	22	18	18	8.8	8.9	107	111	0.9	0.9	128	128	136	140	4.3	4.5	1.4
0	1	4	6	14	6	5	3	1	0	0	0	0	1	0	0	0	0	0	0	0	2	66	41.3	52.7	12.9	16.5	217	407	10.5	19.5	12	21	23	28	13	18	8.6	8.8	95	100	1	1	120	269	134	136	3.9	4.4	2.1
0	1	1	4	4	1	1	2	0	0	1	0	0	0	0	0	0	0	0	0	0	5	66	34.1	39.7	11.4	13.6	274	316	9.9	12.4	14	17	20	20	5	7	7	8.6	97	105	0.5	0.5	95	113	130	131	4.1	7.5	1.9
0	1	2	8	13	6	4	3	0	1	0	0	0	0	0	0	0	0	0	0	0	9	68	24.2	30.5	8.7	10.6	42	89	7.4	11.2	4	13	18	26	17	21	6.7	7.8	100	110	0.9	1.2	83	382	134	140	3.9	5.5	0.9
0	1	1	2	3	1	1	1	0	0	0	0	0	0	0	0	0	0	0	0	0	5	69	28	39.9	10.2	14.5	118	168	6.2	18.5	13	16	18	25	14	17	9.1	9.1	104	110	0.9	1.1	100	111	137	140	4.2	4.3	1.4
0	0	3	2	15	6	5	4	0	0	0	0	0	0	0	0	0	0	0	0	0	2	60	36.1	36.1	12	12	104	104	9.5	9.5	14	14	25	25	11	11	9.2	9.2	102	102	0.6	0.6	214	214	138	138	3.2	3.2	1.3
0	0	1	2	13	6	4	3	0	0	0	0	0	0	0	0	0	0	0	0	0	2	57	29.2	37.4	9.9	12.5	315	385	11.4	15.4	11	16	23	28	36	43	8.2	8.2	102	104	1.3	1.6	114	440	136	138	4.5	5	1.4
0	1	4	2	6	4	1	1	0	1	0	1	0	1	0	0	0	0	0	0	0	4	90	37.3	42.8	12.3	13.9	232	258	7.2	9.9	13	24	20	22	24	32	7.3	8.7	94	108	1.5	1.9	178	470	134	139	2.4	4.2	2.5
0	0	4	3	11	6	1	4	1	0	0	0	0	0	0	0	0	0	0	0	0	7	86	24	37.4	8.4	13.2	129	275	2.5	8.5	14	17	19	21	17	28	7.2	8.6	107	112	0.9	1.5	102	151	139	145	3.4	4.4	2.9
0	1	1	2	9	5	2	2	0	0	0	0	0	0	0	0	0	0	0	0	0	7	30	37.4	40.7	12.2	13.3	162	205	10	22.2	13	15	24	27	10	16	8.7	9.2	103	106	0.5	0.8	106	116	139	141	3.6	3.9	0.9
1	1	2	14	3	1	1	1	0	0	0	0	0	0	0	0	0	0	0	0	0	2	63	23.3	28.7	7.3	9.6	74	83	12.8	17.5	28	39	5	18	59	70	7.3	7.9	99	110	3.9	4.5	83	420	143	150	5	5.5	5.9
0	1	1	3	15	6	5	4	1	0	0	0	0	1	0	0	0	0	0	0	0	2	53	24.3	30.1	8.6	10.3	101	181	11.6	15.8	11	9	24	27	11	14	7.4	7.1	106	109	0.6	0.6	132	138	136	140	3.6	4.3	1.6
0	0	1	2	8	6	1	1	0	0	0	0	0	0	0	0	0	0	0	0	0	3	78	31.8	38.1	10.6	12.9	208	249	8	12.7	16	17	18	20	12	28	8	9	104	106	0.6	0.9	206	263	136	137	3.6	3.7	1.3
0	0	1	5	11	6	1	4	0	0	0	0	0	0	1	0	0	0	0	0	0	2	68	30.5	32.3	9.4	9.5	170	175	9.2	11	9	11	33	34	37	39	8.3	8.3	105	110	1.2	1.3	89	127	145	148	4.4	5.1	0.7
1	0	1	10	13	6	4	3	0	0	0	0	0	0	0	0	0	0	0	0	0	3	47	26.5	35.2	10.3	11.1	128	238	9.2	17.7	12	17	19	24	4	6	6.9	7.1	96	102	0.6	1	76	290	129	134	2.8	6.3	2.9
0	1	1	7	14	6	4	4	1	1	0	0	0	0	0	0	0	0	0	0	0	2	68	26.8	30	9.1	10.3	118	139	7.2	11.8	14	18	20	23	39	44	7	8.7	105	109	4.5	5.3	126	213	138	143	3	3.9	1.6
0	1	4	3	14	6	5	3	0	0	0	0	0	0	0	0	0	0	0	0	0	2	58	26.6	28.5	8.9	9.5	175	197	12.2	15.9	6	10	25	28	18	32	7.5	8.2	108	110	0.8	1.3	139	187	139	141	3.9	4.6	1.2
0	0	1	2	15	6	5	4	0	0	1	0	0	0	0	0	0	0	0	0	0	2	64	28.9	35.4	9.4	11.5	217	289	6.6	11.7	18	21	19	21	36	47	8.4	9	95	101	1.4	2.7	124	144	131	136	3.6	3.9	2.5
1	1	2	2	3	1	1	1	0	1	0	0	0	1	0	0	0	0	0	0	0	8	77	38.3	43.5	12.6	14.1	183	189	12.6	13.4	14	14	20	20	12	12	8.2	8.2	110	110	0.8	0.8	118	118	140	140	4.3	4.3	2
0	1	4	5	14	6	5	3	0	1	0	0	0	0	0	0	0	0	0	0	0	4	51	32.9	35.2	11.3	11.7	92	99	10.3	10.9	17	20	15	17	42	54	8.7	8.9	96	99	1.5	1.8	136	183	131	134	3.6	4.2	3.8
1	1	1	6	3	1	1	1	0	0	0	0	0	1	0	0	0	0	0	0	0	10	68	30	32.2	10.5	11	123	146	10	13	12	14	22	25	41	43	8.5	8.6	105	109	2.2	2.2	183	189	138	141	3.7	3.9	5.5
1	0	1	8	15	1	0	1	0	0	0	0	0	0	0	0	0	1	0	0	0	2	80	37.2	37.2	12.2	12.2	82	82	17.9	17.9	14	15	13	15	24	24	7	7	113	115	0.8	0.8	124	124	138	139	3.6	4.4	2
0	1	4	3	13	6	4	3	0	0	0	0	0	0	0	0	0	0	0	0	0	7	61	28.8	37.5	8.2	11.6	57	84	3.9	4.8	10	12	38	42	9	12	8.4	9.1	81	89	0.6	0.7	65	79	134	142	3.6	4.1	1
0	1	1	2	10	5	2	3	0	1	0	0	0	0	0	0	0	0	0	0	0	6	44	22.6	29.9	7	8.8	64	100	6.4	8.3	13	18	28	30	4	9	8.6	8.6	99	106	0.5	0.9	181	220	142	146	3	3.3	2
0	0	4	2	15	1	0	1	1	0	0	0	0	0	0	0	0	0	0	0	0	2	22	19.4	37.5	6.7	12.6	86	233	2.7	17.5	11	17	18	25	12	20	6.6	12.3	107	137	0.7	1.6	93	290	135	168	3.2	4.3	3.5
0	1	4	3	3	1	1	1	1	1	0	0	0	1	0	0	0	0	0	0	0	4	28	27.3	46.7	11.5	15.4	126	202	17.8	33.1	14	16	19	20	13	24	6.1	7.6	115	118	1.2	1.2	120	135	143	150	4	5.6	3.6
0	1	4	7	14	6	5	3	0	0	0	0	0	0	0	0	0	0	0	0	0	2	49	24.4	28.6	7.3	8.6	84	85	2.8	3.5	16	17	24	24	21	25	8.9	9.1	97	97	6.7	7.5	84	107	137	138	4.3	5.3	1
0	0	2	2	14	6	4	4	0	0	1	0	0	1	1	0	0	0	0	0	0	2	90	25.6	28.8	7.8	8.7	281	329	12.8	15.6	12	15	19	23	54	75	8.6	9.4	104	109	1	1.3	109	366	138	143	4.2	5.4	1.3
1	1	1	7	14	6	5	3	0	0	0	1	0	0	0	0	0	0	0	0	1	4	70	27.5	27.5	8.6	8.6	97	97	10	10	14	14	24	24	63	63	8.9	8.9	107	107	4.9	4.9	108	108	140	140	4.8	4.8	1.8
0	1	1	3	14	6	5	3	2	0	0	0	0	0	0	0	0	0	0	0	0	14	28	34	50	11	15.3	156	239	8.3	12.6	11	18	20	24	17	26	7.8	8.4	108	110	1	1.2	121	157	139	141	4.7	5.6	1.6
0	0	4	2	15	6	0	4	2	0	0	0	0	0	0	1	0	0	0	0	0	15	65	23.6	41.1	8.6	13.6	71	243	7.7	11.6	13	14	21	22	6	7	7.9	8.2	103	107	0.6	0.8	114	124	135	138	3.6	4.1	1.1
0	1	1	2	14	6	5	3	1	1	0	0	0	0	0	0	0	0	0	0	0	3	37	31.6	39.4	11.3	13.9	89	277	7	20.4	11	18	20	26	17	20	8.1	8.9	110	111	1	1.5	124	212	143	147	3.7	4.5	2.2
1	1	3	5	11	6	1	4	1	1	0	0	0	0	0	0	0	0	0	0	0	8	67	32.9	41.5	10.7	13.2	154	206	3.8	9	11	20	17	23	8	12	7.6	9	100	107	0.5	0.8	120	277	138	142	2.9	4.2	1.2
0	1	4	2	11	5	2	4	0	0	0	0	0	0	0	0	0	0	0	0	0	3	77	28.8	34.6	9.6	12.1	199	277	10	22.1	12	21	19	23	7	16	7.9	8.2	94	103	0.6	0.8	88	153	130	134	3.4	4.7	0.9
0	0	1	4	14	6	5	3	0	0	0	0	0	0	0	0	0	0	0	0	0	5	62	24.4	25.7	8.5	8.7	51	55	1.4	1.6	14	21	14	15	50	53	6.4	6.4	102	105	4.8	5.4	89	147	130	133	4.2	4.5	1.2
0	0	1	3	10	6	1	3	0	1	0	0	0	0	0	0	0	0	0	0	0	6	56	24.2	25.3	7.6	7.7	303	324	6.3	8.9	14	15	29	31	61	65	7.5	7.7	102	105	1.3	1.4	82	198	141	141	4.3	6.6	1
0	0	2	2	14	6	5	3	1	0	0	0	0	1	0	0	0	1	0	0	0	2	59	25.4	26	7.9	8	377	419	11.5	16	11	16	22	24	7	8	8.1	8.6	96	97	0.3	0.4	167	176	128	129	4.4	4.7	1.1
0	1	1	7	11	6	1	4	1	0	0	0	0	0	0	0	0	0	0	0	0	33	88	25.4	37.6	8.3	12.4	108	167	5.8	8.4	12	17	22	28	27	29	8.8	9.4	100	106	1.5	1.8	101	143	135	138	4.3	4.9	0.9
0	1	4	2	13	6	4	3	0	0	0	0	0	0	0	0	0	0	0	0	0	6	68	24.1	25.2	7.8	8.5	172	189	8.1	9.2	19	22	23	27	71	77	8.7	9.1	89	93	2.2	2.7	111	129	129	133	3.4	4.6	1.1
0	0	1	2	13	5	4	4	0	1	0	0	0	0	1	0	0	0	0	0	0	4	90	31.3	33.1	10.7	11.1	257	321	18	18.1	15	17	23	23	43	45	8.2	8.6	105	109	1.6	1.8	87	160	141	143	3.9	3.9	1.5
0	0	1	4	3	1	1	1	0	0	0	0	0	0	0	0	0	0	0	0	0	4	71	29.3	29.3	8.9	8.9	228	228	4.4	4.4	14	14	29	29	29	29	8	8	102	102	3.4	3.4	86	86	142	142	3.3	3.3	1.1
0	1	1	5	12	6	2	4	2	0	0	0	0	0	0	0	0	0	0	0	0	2	56	29.4	33.2	10	10.8	151	169	10.5	17.8	7	8	28	28	9	12	7.4	7.5	105	109	0.7	0.8	159	159	137	140	3.5	5.1	1.7
0	0	1	6	3	1	1	1	0	0	0	0	0	0	0	0	0	0	0	0	0	12	54	33.9	35.3	9.7	10.8	187	196	6.9	12.7	18	21	24	24	44	51	6.4	7.5	101	103	6.2	7.1	114	131	140	141	4.8	5.3	1.1
0	0	4	10	5	1	1	3	1	0	0	0	0	0	0	0	0	0	0	0	0	3	58	23.9	40.8	7.6	13.3	53	89	4.3	6.2	11	14	26	32	16	26	7.1	8.1	96	98	0.5	0.7	101	154	138	139	3.1	3.9	1.7
0	1	1	3	15	6	5	4	2	0	0	0	0	0	0	0	0	0	0	0	0	3	82	28.8	32.4	9.3	10.6	103	129	7.8	10	11	15	21	21	42	47	8.5	8.5	106	109	1.5	2.2	105	105	136	137	4.8	5.1	1
1	1	1	8	6	4	1	1	0	0	0	0	0	0	1	0	0	0	0	0	0	15	53	23.3	24.2	7.5	8.2	73	87	10.8	12.9	16	17	18	19	67	69	8.7	8.9	114	116	1.9	2	174	177	144	147	3.8	4.3	1.1
0	1	1	3	15	6	5	4	1	0	0	0	0	0	0	0	0	0	0	0	0	2	59	33.8	40.1	11.3	13.1	265	291	17.2	24.3	10	13	26	29	20	22	10.1	9.6	105	107	0.7	0.9	144	144	139	141	4.5	4.6	1.7
0	0	1	2	11	6	1	4	0	1	0	0	0	0	0	0	0	0	0	0	0	3	55	29.5	30	9.7	10.1	76	80	6.4	6.7	8	9	28	29	10	11	7.5	7.8	106	106	0.3	0.3	73	84	139	139	3.6	3.7	3.3
0	0	2	4	14	6	5	3	2	0	0	0	0	0	0	0	0	0	0	0	0	2	53	23.3	34.2	7.4	10.7	120	151	11.8	18.8	13	17	20	21	7	8	8.2	8.2	105	113	0.7	0.7	101	101	138	138	4.2	4.7	1.1
0	1	1	3	14	6	5	3	1	0	0	0	0	0	0	0	0	0	0	0	0	2	69	33	41.3	10.2	12.7	257	348	9.4	11.7	15	20	21	22	37	50	8.8	9.9	92	104	3.4	4	102	104	128	140	3.9	5.8	0.8
0	1	1	4	14	6	4	4	1	0	0	0	0	0	0	0	0	0	0	0	0	7	84	22.3	31	7.4	10.4	64	203	2.9	10.2	9	18	20	27	21	24	6.6	8.2	106	109	1.4	1.7	127	234	136	143	2.6	3.9	1.9
0	0	2	4	10	6	1	3	0	0	0	0	0	0	0	0	0	0	0	0	0	20	69	34.1	44.7	10.5	13.7	252	356	13.5	17.5	14	16	24	25	17	27	8.5	9	99	101	1	1.5	103	207	137	141	4.8	5.8	1.6
0	0	1	2	15	6	5	4	3	0	0	0	0	0	0	0	0	0	0	0	0	4	57	24.7	32.6	8.1	11.2	144	257	9.8	14.9	9	10	27	31	18	18	10.7	10.7	108	111	1	1.1	111	131	143	147	3	4.5	0.9
0	0	1	2	7	5	1	1	0	0	0	0	0	0	0	0	0	0	0	0	0	25	67	34.6	42.3	11.5	13.6	154	203	20.1	29.3	10	15	19	20	19	27	4.8	7.3	110	113	0.6	1	110	147	137	142	3.7	4	1.1
1	0	2	5	6	1	1	1	0	0	0	0	0	0	0	0	0	0	0	0	0	2	90	28.5	37.6	8.6	11.5	271	392	13.8	15.8	14	25	18	23	89	104	7.5	9.7	128	134	3.6	4.9	88	362	158	170	3.4	4.7	1.6
0	1	3	2	12	5	4	3	0	0	0	0	0	0	0	0	0	0	0	0	0	8	68	39.7	42.6	13.3	13.9	270	274	14.4	27.6	14	19	25	25	11	14	9.2	9.3	96	96	0.6	0.9	125	127	131	136	4.3	4.4	1
0	0	4	3	14	6	5	3	5	0	1	0	0	0	0	0	0	0	0	0	0	2	61	28	35.6	9.2	11.4	90	173	6.1	14.1	10	18	25	30	9	10	8	8.7	97	99	0.8	0.9	127	181	135	137	3.9	4.2	1.6
0	1	1	4	4	2	1	1	0	0	0	0	0	0	0	0	0	0	0	0	0	15	38	19.4	25.5	7.1	9.5	98	220	3	17	8	12	25	26	12	12	7.1	8.6	113	115	0.7	0.8	129	136	144	146	4.3	4.5	1.4
0	0	1	2	8	5	1	2	0	0	0	0	0	0	0	0	0	0	0	0	0	7	81	30.4	38.5	9.8	12.7	198	259	8.5	11.5	11	17	20	25	10	13	8.4	9.3	99	111	0.7	0.8	144	200	137	146	3.4	4.1	1.4
0	0	1	4	14	6	5	3	0	1	0	0	0	0	0	0	0	0	0	0	0	3	69	24.8	30	7.8	9.7	59	60	18	18.3	17	18	18	18	66	71	7.7	8.5	110	115	2.1	2.2	203	245	141	147	4	4.4	1.2
0	1	1	3	10	6	1	3	0	0	0	0	0	0	0	0	0	0	0	0	0	5	64	29.3	37.1	9.8	12.6	51	82	2.4	3.3	15	23	17	24	17	21	8.7	9.2	98	101	0.9	1	106	144	133	136	3.9	4.7	1.8
0	1	1	2	9	4	1	4	0	1	0	0	0	0	1	0	0	0	0	0	0	33	26	46	50.9	15.5	17.2	206	249	15.8	20	18	25	15	22	10	15	6.8	8.6	100	103	0.7	1.6	141	223	137	143	4	5	3.5
1	0	1	3	15	6	5	4	0	0	0	0	0	0	0	0	0	0	0	0	0	8	61	35.5	38.5	11.1	11.7	214	246	7.1	7.6	13	15	28	31	28	34	8.8	9.3	95	106	1.3	1.5	139	253	134	137	3.7	3.9	0.9
0	1	1	2	9	5	1	3	0	0	0	0	0	0	0	0	0	0	0	0	0	2	45	25.1	25.1	8.4	8.4	188	188	3.3	3.3	18	18	25	25	13	13	9.1	9.1	99	99	0.9	0.9	78	78	138	138	3.8	3.8	1.1
0	0	4	3	15	6	5	4	0	0	0	0	0	0	0	0	0	0	0	0	0	2	71	26.3	31.7	8.5	10.7	185	237	12.9	19.4	12	19	20	25	35	57	6.3	7.1	93	113	1.6	3.1	156	534	131	142	4.2	5.5	1.1
0	1	1	4	14	6	5	3	0	0	1	0	0	0	1	0	0	0	0	0	0	3	63	31.8	32.7	10.4	10.7	217	286	16.4	19.5	15	16	23	26	19	24	7.4	7.7	96	98	4.8	5.1	113	134	133	133	3.8	4.1	1.7
0	0	4	2	9	5	1	3	1	0	0	0	0	0	0	0	0	0	0	0	0	7	24	26.3	34.9	9.3	12.6	105	158	2.1	3.6	11	11	25	25	3	5	6.9	8	106	110	0.5	0.6	114	131	139	142	3.4	3.9	0.8
0	1	1	5	5	1	1	3	0	0	0	0	0	0	0	0	0	0	0	0	0	2	83	21.1	22.5	6.6	7.7	326	369	12.3	32.6	18	20	15	17	33	44	7.7	7.9	110	112	1.8	2.4	93	111	141	144	3.2	4.3	1.9
0	1	1	4	15	6	5	4	0	1	0	0	0	0	0	0	0	0	0	0	1	4	52	27.5	30.5	8.9	9.5	180	191	10.4	11.5	20	26	17	17	28	76	8.9	9	100	102	5.5	6	109	119	134	138	4.6	4.7	1.5
0	0	4	4	11	6	2	3	0	1	0	0	0	1	0	0	0	0	0	0	0	7	74	34.7	36.3	10.9	11.2	200	234	21.3	24.3	20	22	25	28	26	35	9.3	9.4	94	96	1.4	1.9	143	152	137	142	4.2	4.7	1.7
0	1	4	2	3	1	1	1	1	0	0	0	0	0	0	0	0	0	0	0	0	11	79	26.3	43.5	8.7	14.8	109	197	9.9	16.6	15	16	21	24	15	21	8.6	8.7	101	108	1	1.2	120	135	136	139	3.8	4.6	1.4
0	0	1	2	14	6	5	3	1	0	0	0	0	1	0	0	0	0	0	0	0	3	62	24.2	25	7.7	7.9	70	71	19.2	27.7	7	8	25	27	37	38	7.5	7.7	107	108	1.1	1.2	117	199	136	136	5	5.4	1.5
0	1	1	3	14	6	5	3	1	0	0	0	0	0	0	0	0	0	0	0	0	2	78	27.1	36.3	8.9	12.3	189	229	12.4	14.1	12	13	22	22	12	13	8.8	8.1	106	109	0.9	0.9	126	126	135	139	5	5	1.8
0	1	2	3	11	6	1	4	0	1	1	0	0	1	1	0	0	0	0	0	0	4	90	27.1	37.4	8.9	12.2	158	248	12.1	20.1	15	21	17	24	43	49	7.1	7.6	101	114	2.9	4.3	108	144	141	142	3.5	4.8	3.1
0	0	1	2	14	6	4	4	0	0	0	0	0	0	0	0	0	0	0	0	0	7	64	32	32	10.1	10.1	352	352	18.2	18.2	17	17	24	25	21	22	8.2	8.4	98	99	0.6	0.6	128	130	136	138	3.1	3.1	1
1	1	4	2	3	1	1	1	0	0	0	0	0	0	0	0	0	0	0	0	0	2	38	39.9	48.5	14	17.4	189	303	14	21.1	12	24	17	23	15	22	8	9.6	109	127	1.1	1.3	96	356	146	159	3.6	4.5	2.3
0	1	1	2	15	6	5	4	0	1	0	0	0	0	0	0	0	0	0	0	0	3	39	19.2	34.4	6.7	12.1	200	383	8.6	16.1	8	23	25	28	21	51	7.2	9.9	87	104	0.7	1.4	123	180	137	139	4.4	5.5	1
0	0	4	2	8	6	1	1	0	0	0	0	0	0	0	0	0	0	0	0	0	11	48	37.1	38.5	13.1	13.4	267	293	15.1	16.8	11	18	24	26	13	16	7.9	9	106	113	0.7	0.8	101	156	145	146	3.4	3.8	0.6
0	0	1	2	15	6	5	4	0	0	1	0	0	0	0	0	0	0	0	0	0	3	66	25.9	25.9	8.1	8.1	236	236	11.7	11.7	14	18	29	32	61	64	8.9	9.2	88	92	1.3	1.3	206	485	130	135	3.6	4.6	1.6
0	0	1	4	12	6	3	3	0	1	0	0	0	1	0	0	0	0	0	0	0	6	30	17.5	24.5	6.3	8.3	199	268	14.4	28	15	21	8	16	70	97	7.3	8.7	108	117	5.5	8.7	82	165	133	143	2.4	3.5	1.9
0	1	1	2	14	6	5	3	0	0	0	0	0	0	0	0	0	0	0	0	0	2	80	22.9	39.3	7.7	13.7	109	193	4.8	5.9	16	17	22	26	19	28	9.4	9.4	99	111	1.2	1.5	207	227	137	138	3.5	4.2	1.6
1	1	4	3	3	1	1	1	2	1	0	0	0	0	0	0	0	0	0	0	0	3	52	30.1	32.9	10.1	10.8	182	290	12.7	21.5	18	23	12	23	20	33	7.7	8.2	100	108	1.5	2.5	125	438	130	140	3.1	7.5	2.3
0	0	2	3	5	3	1	1	0	2	0	0	0	1	0	0	0	0	0	0	0	7	72	41.3	41.3	13.4	13.4	145	163	11.2	11.2	16	16	24	24	24	24	9.2	9.2	102	102	0.9	0.9	214	214	138	138	3.5	3.5	1.3
0	1	1	2	14	6	4	4	1	0	0	0	0	0	0	0	0	0	0	0	0	3	62	28.1	29.6	9.6	10	139	276	11.2	13	8	10	27	29	12	15	7.3	7.6	105	106	0.6	0.7	97	116	138	139	3.5	3.7	1.2
0	1	1	3	14	6	5	3	2	1	0	0	0	0	1	0	0	0	0	0	0	4	59	28.8	35.1	9.4	11.7	27	38	1.9	4.7	9	13	19	21	47	51	7.6	7.6	105	109	1.5	1.6	63	136	137	139	4.1	4.8	2.6
0	1	1	2	13	6	4	3	0	0	0	0	0	0	0	0	0	0	0	0	0	2	57	41.9	45.3	14.6	15.6	165	244	5.3	8.6	11	17	22	24	15	22	8.1	8.9	104	109	0.5	1.1	144	157	135	140	3	4.4	1.9
0	0	1	3	8	5	1	2	1	0	0	0	0	0	0	0	0	0	0	0	0	3	64	30.8	36.2	10.6	12.2	127	137	9	16.1	9	9	25	25	9	13	7.9	7.9	106	113	0.3	0.4	119	119	136	136	4.1	4.1	1.7
0	1	4	3	15	6	0	3	0	0	0	0	0	0	0	0	0	0	0	0	0	2	53	32.9	36	10.9	11.8	103	120	12.7	21.7	8	9	24	24	11	13	8	8	103	108	0.8	1.1	108	108	136	136	4.2	4.4	1.1
0	0	1	3	14	6	5	3	2	1	0	1	0	1	0	0	0	0	0	0	0	2	82	21.9	24.5	7.2	7.8	254	304	9.6	13.6	19	29	14	18	46	58	8.7	9.5	81	89	1.7	2	72	91	117	121	4.8	6.7	2.4
0	1	1	8	10	6	1	3	1	0	0	0	0	1	0	0	0	0	0	0	0	24	61	20.5	24	7	8.5	61	94	24.3	29.5	16	20	31	36	20	44	8.8	9.5	85	91	1.4	2.6	65	251	136	144	4.3	5.3	1.51
0	1	2	3	15	6	5	4	0	0	0	0	0	0	0	0	0	0	0	0	0	2	74	22.8	24.3	6.7	7.6	352	354	10.6	11.3	20	21	17	19	49	52	7.2	7.2	95	95	4.7	4.8	161	182	128	131	3.7	3.7	1.9
0	1	2	3	15	6	5	4	0	0	0	0	0	0	0	0	0	0	0	0	0	2	73	22.1	22.1	6.6	6.6	193	193	6.4	6.4	12	13	22	23	41	41	8.5	8.5	106	108	3.7	3.9	112	129	142	142	4	4.4	1.7
0	0	2	2	10	5	3	2	0	1	0	0	0	1	0	0	0	0	0	0	0	2	91	32.9	32.9	10.4	10.4	234	234	21.7	21.7	12	18	18	25	27	28	8	8.8	105	114	1	1.7	98	127	138	139	5.4	6	1
0	0	3	4	15	6	5	4	1	0	0	0	0	0	0	0	0	0	0	0	0	2	20	29.1	31.3	9.8	10.2	136	146	21.7	21.9	10	11	20	20	7	7	6.8	7.6	113	115	0.5	0.5	109	111	140	141	2.7	4.9	1.8
0	1	1	3	13	6	4	3	0	0	0	0	0	0	0	0	0	0	0	0	0	6	41	30	33.2	10.8	11.4	103	113	5.3	5.4	10	10	24	24	7	7	7.1	7.1	110	110	0.5	0.5	95	95	140	140	3.5	3.5	1.1
1	1	1	9	15	1	0	1	0	2	1	1	0	1	0	0	0	0	0	0	0	2	80	34.6	35	10.7	10.8	94	97	11.2	22.4	17	25	15	20	47	56	6.9	8.4	96	102	3.2	4	56	120	129	134	4.4	5.8	4.6
0	0	2	6	11	6	2	3	0	1	0	0	0	0	0	0	0	0	0	0	0	9	52	23.6	30.2	8.2	10.1	61	119	1.5	11.4	10	17	16	22	34	38	7.7	8.1	106	109	2.3	3.1	125	136	134	137	4	4.5	1
0	1	1	7	8	5	1	2	0	1	0	0	0	0	0	0	0	0	0	0	0	21	71	50.9	57.4	15.9	18.1	101	161	3.2	17.3	13	18	19	29	19	33	7.1	8.3	102	108	0.9	1.3	83	109	139	143	3.6	6.2	3.1
1	1	4	5	3	1	1	1	1	0	0	0	0	0	0	0	0	0	0	0	0	18	80	42.5	44	13.6	14.5	174	186	18.8	22.2	11	16	17	19	24	28	6.5	7.9	112	116	0.6	1	107	163	138	144	4.3	5.3	1
0	0	1	2	14	6	5	3	0	0	1	0	0	1	0	0	0	0	0	0	0	3	71	18.8	25.1	5.8	7.8	160	205	8.7	12.1	11	16	17	19	17	18	8.2	8.9	100	100	1.4	1.5	187	206	130	133	4.1	4.8	1
0	1	1	2	13	6	4	3	0	0	0	1	0	0	0	0	0	0	0	0	0	3	81	21.1	28.2	6.3	8.8	94	119	0.4	1.5	7	12	18	21	25	31	6.1	6.1	109	115	0.9	1	97	125	139	144	4.6	4.8	1.6
0	0	1	3	14	6	5	3	0	0	0	0	0	0	0	0	0	0	0	0	0	4	90	33	33	10.6	10.6	112	112	36.9	36.9	21	21	25	25	23	23	8.6	8.6	95	95	1.4	1.4	73	73	137	137	3.5	3.5	1.5
1	1	1	2	3	1	1	1	0	1	0	0	0	0	0	0	0	0	0	0	0	6	90	41.4	47.9	14.1	16	106	135	5.9	9.6	17	17	27	27	20	20	7.3	7.6	103	103	1	1	151	151	143	143	3.9	3.9	2.3
0	1	1	7	15	6	5	4	1	0	0	0	0	0	0	0	0	0	0	0	0	5	78	22.5	27.3	7.6	9.1	77	143	6	19.2	10	10	23	23	13	15	7.5	7.8	101	107	0.8	1.1	149	136	136	136	4.1	4.9	1.2
0	0	1	2	14	6	5	3	0	0	0	0	0	0	0	0	0	0	0	0	0	3	53	23.7	30.1	8.2	10.3	193	276	10.5	13.8	8	9	29	32	11	15	7.1	7.4	106	107	0.4	0.5	108	119	140	143	3.6	3.8	1
0	1	4	3	7	5	1	1	0	0	0	0	0	0	0	0	0	0	0	0	0	2	80	41.5	44.5	13.1	14	225	226	8.1	11.2	16	19	22	24	14	17	9.1	9.3	101	102	1	1.2	185	194	136	138	4.1	6	0.9
1	0	1	8	14	6	4	4	0	0	0	0	0	0	0	0	0	0	0	0	0	20	94	23.9	33.1	6.8	11.3	156	243	6.9	18	16	24	21	25	19	24	12.1	12.1	106	106	1	1.3	221	221	143	148	3.4	3.7	1.1
0	0	1	6	9	5	2	2	1	1	0	0	0	0	0	0	0	0	0	0	0	4	84	25.9	28.3	8.4	9.1	184	185	17.4	18.4	17	19	22	23	118	123	8.1	8.4	99	101	2.5	2.8	124	215	134	136	5.1	5.9	1.1
0	0	1	2	4	2	1	1	1	1	0	0	0	0	0	0	0	0	0	0	0	41	56	21.9	39	7.1	13.3	147	251	11.3	16.7	10	16	18	22	14	16	6.8	9.3	103	114	0.9	1.1	105	202	137	146	3.5	8.1	1.1
0	0	1	3	10	5	1	4	0	1	0	0	0	1	0	0	0	0	0	0	0	14	73	39.3	41.9	12.8	13.3	184	185	7.7	11.7	14	18	18	20	13	16	6.6	8.1	104	109	0.5	0.7	128	191	136	139	4.1	4.6	1.5
0	0	4	2	6	4	1	1	0	0	0	0	0	0	0	0	0	0	0	0	0	6	83	30.5	32.1	10.6	10.8	400	436	12.5	16.9	10	17	22	31	23	27	7.6	7.6	73	88	0.6	0.7	46	228	106	120	4.1	6.8	1
0	0	1	2	12	6	2	4	0	0	0	0	0	1	0	0	0	0	0	0	0	9	64	37.6	45.4	12.5	15.5	176	201	15.7	22.1	15	25	16	23	15	17	8.2	9.3	91	101	0.5	0.8	236	428	128	135	3.8	4	1
1	1	1	4	3	1	1	1	0	1	0	0	0	0	0	0	0	0	0	0	0	11	22	27.8	42.4	10.1	14.9	58	246	4.2	17.7	10	24	12	27	12	31	6.9	27.4	101	115	1	3.1	132	531	129	153	3	5.6	2.8
1	1	1	3	3	1	1	1	0	0	0	0	0	0	0	0	0	0	0	0	0	11	77	35.2	39.4	11.6	12.3	127	137	11.8	17.1	13	19	25	27	31	38	8.4	8.6	96	103	1	1.3	142	267	140	143	3.9	4.4	1.8
0	1	4	4	15	6	5	4	1	1	0	0	0	0	0	0	0	0	0	0	0	2	29	24.1	29.2	8.5	9.5	112	171	4.5	7.4	13	21	20	23	37	45	6.5	7.4	101	103	1.1	1.8	107	141	136	138	3.3	4.2	1.8
0	1	1	9	15	6	5	4	0	1	0	0	0	1	0	0	0	0	1	0	0	4	78	22.8	32.3	7.2	10.2	104	158	5.5	48.6	21	24	19	24	66	69	8.2	8.5	94	99	2.1	2.4	102	325	137	143	3.7	4.3	6.3
0	0	3	3	8	4	1	3	0	0	0	0	0	0	0	0	0	0	0	0	0	15	72	30.8	33.9	9.6	10.6	146	171	6.3	7.6	12	18	21	29	17	18	8	8.3	91	93	0.5	0.5	129	156	127	128	4.5	5.2	0.5
0	1	4	2	5	1	1	3	0	1	0	0	0	0	0	0	0	0	0	0	0	22	68	47.8	52.8	15.8	17.2	256	266	15.1	16.7	15	19	20	24	13	21	8.5	8.6	104	110	1.1	1.6	105	122	142	149	4.1	4.6	1.3
1	1	4	4	14	6	4	4	0	1	0	0	0	1	0	0	0	0	0	0	0	3	62	20.9	26.5	6.9	8.6	32	36	1	3.5	11	14	20	23	19	28	6.2	6.5	105	106	0.5	0.9	170	226	138	140	4	4.8	2.8
0	1	1	5	9	4	2	3	1	0	1	0	0	1	0	0	0	0	0	0	0	2	77	30.1	34.3	9.4	10.8	176	205	9.5	12.3	9	18	22	23	63	95	7.3	8.1	129	134	1.5	3.6	139	250	158	167	3.4	3.9	0.8
0	0	3	3	11	6	2	3	0	0	0	0	0	0	0	0	0	0	0	0	0	3	81	32.6	35.3	11.2	12	270	287	7.8	13.4	13	27	17	31	29	33	9	9.3	100	105	1	1.3	161	410	140	146	3.1	4.8	2.9
0	1	1	4	15	6	5	4	0	0	0	0	0	0	0	0	0	0	0	0	0	3	68	19.5	32.7	6.6	11.2	155	188	12.3	18.5	9	13	22	23	14	16	7.7	7.7	111	112	0.8	0.9	81	150	138	141	4.5	5.2	0.8
1	1	1	2	9	5	1	3	0	0	0	0	0	0	0	0	0	0	0	0	0	26	83	24.4	29.6	8.8	10.7	101	125	13.7	23.7	11	15	23	25	16	18	7.6	8.3	104	105	0.8	0.9	128	191	140	143	3.7	3.8	1.3
1	1	1	9	3	1	1	1	0	1	0	0	0	0	0	0	0	0	0	0	1	4	21	19.8	27.5	6.6	8.7	232	267	12.1	19.8	14	15	24	25	34	35	8	9	95	98	2.6	2.6	82	111	130	131	4.4	5.8	0.7
0	1	4	11	10	6	1	3	0	0	0	0	0	0	0	0	0	0	0	0	0	2	92	20.7	33.6	6.7	11.4	27	94	5.4	7.7	6	14	20	27	80	91	7.5	8.1	119	125	3.1	3.7	123	152	148	160	3.5	3.8	2.9
1	1	1	2	15	6	5	4	0	0	0	0	0	0	0	0	0	0	0	0	0	2	70	25.2	30.7	8.4	10.3	102	127	14.3	14.6	14	17	21	23	16	17	7.3	7.5	101	103	1.5	1.5	187	200	133	135	4.8	5.7	2.4
0	0	4	3	14	6	4	4	0	0	0	0	0	0	0	0	0	0	0	0	0	3	90	40.6	40.6	12.8	12.8	155	155	27	27	13	17	22	25	25	32	8.6	8.8	102	104	1	1.3	105	214	140	142	4.4	4.8	1.8
0	1	1	4	11	6	1	4	1	1	0	1	0	0	0	0	0	0	0	0	0	4	84	33.2	42.4	11.8	14.1	70	106	16.6	17.8	9	11	18	18	40	45	6.5	6.9	117	118	1	1.1	98	105	141	142	4.1	4.3	1.5
0	1	1	2	6	4	1	1	0	0	0	0	0	0	0	0	0	0	0	0	0	5	60	33.4	33.4	11.7	11.7	167	167	14	14	16	16	24	24	31	31	7.9	7.9	106	106	1.4	1.4	156	156	142	142	4.3	4.3	2.4
0	0	4	4	6	3	2	1	0	1	0	0	0	1	0	0	0	0	0	0	0	2	78	29.6	36.1	9.4	11	240	297	21.6	25.3	23	30	13	16	115	117	8.7	8.9	117	118	7.1	7.5	201	222	155	160	4.4	4.6	1.6
0	1	1	3	14	6	5	3	0	0	0	0	0	0	0	0	0	0	0	0	0	3	38	22.2	24.6	7.6	8.3	167	187	6.7	9.7	19	22	17	26	70	113	7.5	7.9	95	97	9	14.2	93	133	130	135	4.5	6	0.5
0	1	2	3	13	6	4	3	0	1	0	0	0	0	0	0	0	0	0	0	0	5	71	25.3	27.6	8.2	8.6	279	284	8.8	9.7	15	22	17	21	36	44	7.8	8.4	105	110	3.4	3.7	125	280	137	142	3.7	5.9	0.9
0	0	1	8	6	1	1	4	0	0	0	0	0	0	0	0	0	0	0	0	0	11	78	36	38.4	10.7	11.5	146	163	11.1	14.8	10	23	13	18	106	122	7.4	7.9	122	128	5.1	5.6	74	450	154	158	3.9	4.9	1.2
0	1	1	3	7	5	1	1	0	1	0	0	0	0	0	0	0	0	0	0	0	8	47	36.8	44	12.4	14.5	84	97	22.7	23.9	12	17	18	25	17	32	7.7	8	104	106	1.6	2.2	134	138	135	137	5.2	5.6	1.6
0	0	4	3	10	4	2	4	0	1	1	0	0	1	1	0	0	0	0	0	0	3	69	19.9	30.1	6.3	9.6	495	616	21.5	33	15	16	18	20	9	13	7.5	8.1	98	106	0.7	0.8	98	218	130	137	3.1	3.7	2
0	1	4	2	13	6	4	3	1	0	0	0	0	0	0	0	0	0	0	1	0	22	25	32.2	38.6	9.7	11.5	167	224	8.9	10.5	13	17	32	34	15	16	8	8.5	96	101	0.5	0.5	86	94	139	144	3.6	4	0.9
0	1	3	5	3	1	1	1	0	1	0	0	0	1	0	0	0	0	0	0	0	10	36	41.4	44.4	14	15.2	169	201	14.5	20.8	8	18	22	33	15	21	6.2	6.8	106	111	1	1.2	301	329	143	146	3.4	4.1	1.6
1	1	4	3	9	5	1	3	1	0	0	0	0	0	0	0	0	0	0	0	0	2	85	30.9	40.9	10	12.7	105	181	13	21.6	15	21	24	26	49	62	8.2	9.1	97	105	1.3	1.9	121	174	143	147	5	5.8	2.6
0	1	1	4	6	4	1	1	0	0	0	0	0	0	0	0	0	0	0	0	0	8	72	32.8	35	10.9	11.8	144	148	11.2	11.9	18	18	21	21	38	40	9.1	9.1	105	106	2.4	2.4	121	231	140	141	3.6	4	2.2
0	0	1	2	15	6	5	4	1	0	0	0	0	0	0	0	0	0	0	0	0	2	63	24.3	30.4	8.7	11.1	161	191	10.9	13.9	9	11	23	25	7	7	7.1	7	106	115	0.5	0.6	119	119	138	143	4	4.4	1.2
0	1	1	3	10	6	1	3	2	1	0	0	0	1	0	0	0	0	0	0	0	9	73	38.2	41.6	12.5	13.5	165	172	5.7	11	12	25	18	20	17	27	7	7.7	101	114	0.7	1.3	96	253	144	147	3.2	4.1	1.9
1	1	4	8	11	5	2	4	0	1	0	0	0	0	0	0	0	0	0	0	1	8	64	25.4	25.9	7.3	7.5	32	34	33.8	35.2	36	51	7	10	61	75	7.4	9.2	82	86	3.4	4.6	36	129	128	136	4.3	5	16.8
0	0	1	2	9	4	1	4	0	0	0	0	0	0	0	0	0	0	0	0	0	9	67	27.2	27.5	9.4	9.5	380	404	8.9	10.2	9	11	30	32	12	14	8.3	8.5	95	97	0.7	0.7	81	99	133	134	3.2	3.8	1.3
0	1	4	6	6	4	1	1	1	1	0	0	0	1	0	0	0	0	0	0	0	8	68	46.6	49.5	15.3	16.6	231	272	19.1	21.6	14	18	22	28	19	22	8	8.5	101	103	0.9	1	154	174	138	139	3.5	4.2	1.6
0	1	1	5	7	4	1	2	1	0	2	0	0	0	1	0	0	0	0	0	0	3	57	26.5	40.5	9.1	13.5	153	195	7.5	9.8	16	21	7	15	74	86	7.1	7.7	111	119	4.9	5.9	31	207	136	143	3.3	5.7	0.6
0	0	1	2	14	6	4	4	0	0	0	0	0	0	0	0	0	0	0	0	0	3	80	33.7	37.2	11.1	12.3	128	184	9.6	13.8	17	17	21	22	18	19	8.1	8.1	106	107	1	1.1	145	218	140	140	4.6	4.8	1.2
0	0	4	2	14	6	5	3	0	1	0	0	0	1	1	0	0	0	0	1	0	3	41	20.8	23.8	6.9	8.2	233	252	18.8	21.1	14	21	9	13	12	16	5.1	6.6	105	118	0.5	0.9	94	315	130	137	3.1	9.6	1.1
0	0	1	2	13	6	4	3	0	1	0	0	0	0	1	0	0	0	0	0	0	2	88	38.7	38.7	12.1	12.1	162	162	13.5	13.5	16	16	20	20	10	10	8	8	107	107	0.6	0.6	139	139	140	140	3.4	3.4	1
0	1	1	8	15	6	5	4	1	1	1	0	0	0	0	0	0	0	0	0	0	2	77	31.5	36	10.7	12.2	125	131	11.1	15.1	12	14	23	23	22	24	8.5	7.8	103	106	1.2	1.3	125	125	135	137	4.3	4.5	1.4
1	1	4	5	13	6	4	3	1	1	0	1	0	1	0	0	0	0	0	0	0	4	76	35.5	41.1	11.7	13.6	79	104	29.8	42.7	12	19	23	25	88	91	8.3	8.6	102	107	2.3	2.5	120	323	137	140	4.1	4.8	2.5
0	1	4	6	4	1	1	2	2	0	1	0	0	1	0	0	0	0	0	0	0	6	68	28.3	28.3	8.4	8.7	116	122	3.8	5.1	12	16	25	27	56	68	6.7	7.2	106	108	2	2	162	225	139	142	5.8	5.9	0.8
0	0	3	2	9	4	1	4	0	0	0	0	0	0	0	0	0	0	0	0	0	2	59	29.2	37.9	9.6	12.6	229	516	15.8	19.3	14	17	13	15	57	95	7.4	9.6	124	130	1.1	1.6	185	561	149	157	2.6	4.1	2.5
0	1	4	4	13	6	3	4	1	1	0	0	0	1	0	0	0	0	0	0	0	3	83	23.2	39.7	8	13.2	108	247	6.4	13.6	8	13	23	29	23	33	9.5	9.5	98	108	1	1.4	113	130	134	135	4.6	5.9	0.9
0	1	1	3	13	6	4	3	0	1	0	0	0	0	0	0	0	0	0	0	0	3	90	27.6	31.4	8.8	9.8	234	242	26.4	33.5	14	19	20	25	38	49	7.9	8.9	95	103	2.4	2.7	128	165	127	137	5	5.7	0.9
0	0	1	5	14	6	5	3	0	0	0	0	0	0	0	0	0	0	0	0	0	2	73	26.9	36.2	9.6	12.7	206	261	10.7	18.3	9	9	23	24	11	15	7.7	8.1	109	111	0.5	0.6	106	106	138	138	4.2	4.2	1.5
0	1	1	3	10	6	1	3	0	0	0	0	0	0	0	0	0	1	0	0	0	5	56	29.9	31.9	10.2	10.5	121	126	11.3	12.9	6	12	32	37	17	20	8.1	8.1	92	93	0.7	0.8	103	210	132	132	4	4.2	1.1
0	0	4	3	15	6	5	4	0	1	0	0	0	1	0	0	0	0	0	0	0	3	74	23	25.7	7	7.9	460	517	14.6	21.1	10	11	20	21	28	28	7.4	7.8	109	112	0.7	0.8	97	99	137	138	4.2	4.4	0.8
0	0	1	2	13	6	4	3	0	0	0	0	1	0	0	0	0	0	0	0	0	4	90	24.4	28.3	8.3	9.2	254	311	6.8	9.7	12	14	27	29	24	30	8.4	8.6	99	104	1	1.1	144	209	138	141	3.3	4	2.7
1	0	4	4	15	4	0	1	0	0	0	0	0	0	0	0	0	0	0	0	0	4	79	26.8	27.3	8.2	8.6	123	145	19.8	22.5	10	16	21	25	17	20	7.9	8	105	107	1	1.1	125	137	140	144	3.8	4	2.3
0	1	4	2	5	1	1	3	1	0	0	0	0	0	0	0	0	0	0	0	0	17	47	32.8	37.7	10.8	12.4	235	253	11.2	11.7	10	12	23	24	12	12	8.2	8.4	107	112	0.8	0.9	181	191	139	141	3.7	4	0.8
0	0	4	2	13	6	4	3	0	0	0	0	0	0	0	0	0	0	0	0	0	2	40	39.5	42.2	13.3	14.3	235	270	19.9	22.4	12	18	20	25	16	19	8	8.7	100	102	1	1.2	103	121	132	134	4.4	6.2	2.4
0	0	4	3	9	4	2	3	0	0	0	0	0	1	0	0	0	0	0	0	0	6	74	27.7	28.3	8.7	9.2	137	198	21.8	33.4	6	13	21	24	33	44	10.2	14.7	95	107	0.5	0.8	96	136	131	138	4.4	6.5	2.6
0	1	1	5	13	6	4	3	0	1	0	0	0	1	0	0	0	0	0	0	0	3	73	21.7	29.1	7.8	10.6	79	168	5.1	11.3	9	15	21	23	26	32	7.9	9.3	106	111	1.2	1.7	106	141	138	140	3.3	4.2	1.3
0	0	4	2	15	6	5	4	0	0	0	0	0	1	0	0	0	0	0	0	0	2	78	26.2	30.1	8.8	9.8	282	358	13.7	14.6	12	14	25	26	10	12	8.3	8.6	96	101	0.7	0.7	195	272	128	137	3.8	4.7	1.1
0	0	1	3	13	6	4	3	0	0	0	0	0	0	0	0	0	0	0	0	0	6	66	38.1	43.6	12.2	14.2	167	185	6.9	8.3	12	16	31	32	20	21	8.2	8.2	99	106	0.9	0.9	151	188	143	145	3.7	4.3	0.7
1	0	4	6	3	1	1	1	0	1	0	0	0	0	0	0	0	0	0	0	0	18	41	19.4	22.5	6.7	7.9	47	96	7.2	11.5	11	22	22	26	9	12	6.5	8.7	87	95	0.4	0.6	91	143	125	130	2.3	4.1	3.1
0	1	1	5	10	6	1	3	0	0	0	0	0	0	0	0	0	0	0	0	0	11	52	28.5	28.9	9.4	9.7	250	253	12.3	12.6	11	12	22	24	13	16	7.2	7.2	104	105	0.9	1	96	117	134	136	3.9	3.9	1.2
0	1	1	6	11	6	3	2	0	1	0	0	0	0	0	0	0	0	0	0	0	3	73	29.8	33.3	9.6	10.4	161	212	5.4	7.7	15	21	24	28	16	32	9	9.2	94	96	1.8	3.3	83	92	132	137	3.3	3.6	2.8
0	1	4	4	13	5	4	4	0	0	0	0	0	0	0	0	0	0	0	0	0	2	81	28.6	32.1	9.5	10.6	304	379	10	11.4	13	15	27	31	52	61	8.2	8.8	98	100	1.3	1.4	182	226	140	142	3.7	4.1	1.4
1	1	1	2	8	6	1	1	0	0	0	0	1	0	0	0	0	0	0	1	0	4	81	31.9	35.3	11	11.8	126	141	5.6	6.1	11	15	27	30	30	32	8.4	9	100	102	1.5	1.7	101	143	134	137	5.3	6.3	0.8
0	0	1	2	15	6	5	4	1	0	0	0	0	0	0	0	0	0	0	0	0	2	76	21.5	27.4	8	8.9	100	114	7.3	8.5	10	12	23	23	16	17	7.7	7.8	112	113	0.5	0.7	127	143	142	143	4	4.2	1.1
0	1	1	6	11	6	1	4	1	0	0	0	0	0	0	0	0	0	0	0	0	19	80	28	29.8	8.8	9.5	337	448	4.4	8.1	15	18	18	19	52	57	7.4	7.5	110	111	2.2	2.8	136	163	141	142	3.6	3.8	0.8
1	1	1	3	14	6	5	3	0	0	0	0	0	0	0	0	0	0	0	0	0	3	74	25.5	27	7.9	7.9	186	213	13.7	14.5	15	16	28	28	72	78	10	10	92	92	3.6	3.9	112	125	135	136	4.8	4.8	1.1
1	1	1	16	3	1	1	1	0	0	0	1	0	0	0	0	0	0	0	0	0	5	64	17.3	24.1	5.7	7.9	37	63	11.3	15	9	14	23	24	107	115	9.3	9.9	106	108	1.2	1.6	85	224	140	145	5.7	6.5	1
0	0	1	9	3	1	1	1	1	1	0	0	0	1	0	0	0	0	0	0	0	4	54	26.9	29.7	9	9.7	196	265	30.1	37	15	22	19	23	25	28	7.8	8.9	99	104	1.9	2.3	123	322	133	139	3	5.4	1.3
0	1	1	8	15	6	5	4	1	0	0	0	0	0	0	0	0	0	0	0	0	2	67	27.9	33.6	9.6	11.2	324	386	17.1	30.5	17	24	16	21	22	34	9.1	10.5	95	103	1.8	2.5	70	508	127	136	4.5	7.6	1.6
0	1	1	9	13	6	4	3	0	0	0	0	0	0	0	0	0	0	0	0	0	3	60	23	26.6	7.1	8.3	66	77	3.8	5.6	14	18	26	29	28	37	7	7.5	97	98	4.8	5.4	136	151	136	138	3.6	4.3	0.5
0	1	4	4	6	4	1	1	0	0	0	0	0	0	1	0	0	0	0	0	0	8	49	29.1	33.4	10.5	11.1	77	90	9.2	11.2	4	6	25	27	15	16	7	7.4	108	110	0.7	0.7	93	111	135	137	3.8	4.1	0.7
0	1	3	4	15	6	5	4	0	0	0	1	0	0	0	0	0	0	0	0	0	2	51	30.4	33.4	9.7	10.7	266	340	17.4	21.8	15	18	20	24	36	39	8.6	8.7	101	103	1.2	1.3	104	107	136	143	3.9	4.5	3
1	1	4	3	3	1	1	1	0	2	0	1	0	1	1	0	0	0	0	0	0	26	59	39.4	41.5	12.1	12.8	249	258	18.5	21.4	10	15	22	27	36	49	8.9	9.4	94	98	1.4	2.7	346	411	132	136	5.9	6.8	1.1
0	0	4	6	4	1	1	2	0	2	0	0	0	1	0	0	0	0	0	0	1	27	68	19.4	36.5	6.5	12.7	37	148	0.9	30	25	30	12	16	38	44	7.5	9.1	102	105	3	3.8	68	191	136	143	4	6.4	9.4
0	1	1	2	10	6	1	3	0	1	0	0	0	1	0	0	0	0	0	0	0	10	68	34.3	39.2	11.7	12.6	106	115	8.8	8.9	14	16	24	26	27	40	7.9	8	101	102	1.9	2.6	105	138	136	137	4.4	4.6	2.2
0	1	4	3	6	4	1	1	1	1	0	0	0	0	0	0	0	0	0	0	0	16	55	21.5	25.1	7	7.9	87	137	6.7	12	10	13	19	23	4	5	7.3	7.8	102	119	0.4	0.6	105	133	134	149	3.9	4.2	1
1	1	1	11	7	5	1	1	0	1	0	0	0	1	0	0	1	0	0	0	0	4	55	23.8	26.2	7.3	8	134	217	34.5	119.6	15	25	11	15	38	43	6.3	7.2	103	106	2.6	3	74	169	130	135	3.3	4.4	1.2
0	0	1	3	14	5	5	4	0	0	0	0	0	0	0	0	0	0	0	0	0	2	75	29.8	34.6	9.7	11.2	204	296	9	14.6	14	17	21	25	12	15	7.5	8.1	108	112	1.3	1.5	100	190	143	148	3.2	3.6	1.1
0	1	1	4	15	6	5	4	0	0	0	0	0	0	0	0	0	0	0	0	0	2	53	36	36.4	11.9	12.2	244	273	13.9	18.6	15	19	19	22	38	41	6.7	7	99	115	4	4.7	101	121	136	144	4.1	5.1	1.8
1	1	1	3	7	5	1	1	0	0	0	0	0	0	0	0	0	0	0	0	0	17	87	30.6	31.7	10	10.1	179	180	12.2	14.5	9	13	22	23	41	41	8.3	8.3	107	116	1.9	2.1	106	121	139	151	4.8	4.9	0.6
0	1	1	4	11	4	4	3	0	3	0	1	0	1	0	0	0	0	0	0	0	3	81	25.1	30.8	8.4	9.8	131	170	9.4	11.3	18	19	13	16	50	56	8.1	8.8	103	108	2.3	2.6	99	139	131	134	5.5	6.6	1.7
1	0	1	3	4	1	1	2	1	0	0	0	0	0	0	0	0	0	0	0	0	8	75	34.4	36.8	11.3	12.3	182	205	8.4	11.7	11	20	20	26	17	23	8.3	8.8	94	101	0.6	1.1	112	157	129	135	3.8	5.3	0.7
0	1	4	2	15	6	5	4	1	0	0	0	0	0	0	0	0	0	0	0	0	2	61	26.4	32.7	8.5	10.2	130	150	14.3	21.3	9	10	23	24	15	16	7.9	7.9	104	109	0.9	0.9	119	119	136	139	4.4	4.5	0.8
0	0	1	2	14	6	4	4	0	0	0	0	0	0	0	0	0	0	0	0	0	5	88	34.4	38.4	11.2	13.4	217	257	9.3	11.4	14	16	20	26	25	29	7.9	8.1	106	110	0.9	1	92	114	141	143	3.7	3.9	1.5
0	0	4	2	11	6	4	1	1	0	0	0	0	0	0	0	0	0	0	0	0	3	88	28.3	35	10.1	11	156	175	9.2	16.2	13	15	19	22	19	20	6.8	7	109	112	0.5	0.6	121	135	139	142	3	4.7	1
1	0	1	3	8	4	1	3	1	2	0	0	0	0	0	0	0	0	0	0	0	7	92	19.3	27.3	6.1	8.8	94	202	12.8	17.3	17	25	10	18	46	49	7.6	8.7	94	106	1.3	1.4	69	154	128	134	4.7	6.2	5.5
0	0	4	4	14	6	4	4	0	1	0	0	0	1	0	0	0	0	0	0	0	2	75	22.9	25.8	7.2	8.1	248	273	9.1	9.5	12	17	20	25	54	60	9.1	9.3	91	96	2.7	2.8	175	221	128	133	4.4	4.9	0.9
0	1	1	7	7	4	1	2	0	0	0	0	0	0	0	0	0	0	0	0	1	8	60	32.4	42	10.9	13.9	238	338	22.8	31.5	22	28	19	29	34	79	8.4	11.2	93	104	6.3	11	59	107	141	142	3.5	8.8	1.6
0	0	1	3	13	5	4	4	0	1	0	0	0	0	0	0	0	0	0	0	0	3	50	23.5	24.2	7.4	7.6	225	260	10.5	15.4	12	15	22	25	3	6	7.8	7.8	97	98	0.4	0.4	110	114	131	131	3.3	3.8	1.7
1	1	1	8	3	1	1	1	1	0	0	0	0	0	0	0	0	0	0	0	0	5	61	34.2	42.1	10.6	13.8	139	189	4	17.1	10	31	10	18	17	23	8.7	9.4	100	110	1	1.4	139	360	138	145	2.6	4.6	4.6
0	1	4	8	15	6	5	4	0	1	0	0	0	1	0	0	0	0	0	0	0	3	50	20.9	30.4	6.7	9.8	269	623	21.5	51.1	11	23	16	24	20	27	7	7.8	102	107	1	1.6	120	308	133	138	3.7	5.9	1.8
0	1	1	2	15	6	5	4	0	0	0	0	1	0	0	0	0	0	0	0	0	3	39	36.3	38.1	12.6	12.6	495	495	13.5	13.5	16	16	21	21	15	15	9	9	106	106	0.7	0.7	135	135	138	138	4.9	4.9	1.3
1	1	1	8	15	1	0	1	0	0	0	0	0	0	0	0	0	0	0	0	0	3	86	28.3	35.6	9.2	11.8	385	452	9.2	22.5	17	19	16	25	25	27	7.5	9.4	101	108	2	2.2	89	131	137	141	3.6	3.9	1.8
0	0	4	4	11	6	1	4	0	0	0	0	0	0	0	0	0	0	0	0	1	10	90	23.2	23.2	7.1	7.1	231	231	8.6	8.6	18	19	19	24	54	78	8.5	9.6	99	102	3.9	5.7	100	135	134	138	4.1	5.4	1.1
0	1	1	2	15	6	5	4	0	0	0	0	0	0	0	0	0	0	0	0	0	2	78	18.7	31.1	5.5	9.9	154	207	7.8	9.8	11	14	24	25	25	33	7.7	7.7	107	109	1.3	1.8	102	163	139	142	4.1	4.8	1.5
0	1	2	2	3	1	1	1	0	0	0	0	0	0	0	0	0	0	0	0	0	10	18	40.6	46.5	13.6	16.1	203	304	9.3	17	9	23	15	21	16	21	7.7	8.8	106	118	1	1.9	81	102	139	146	3.5	4.3	2
0	0	2	6	9	6	1	2	1	1	1	0	0	0	0	0	0	0	0	0	0	3	92	25.6	28.3	8	8.8	222	245	8.2	8.8	7	11	29	33	15	17	7.3	8	107	109	0.6	0.7	107	115	139	146	3.3	3.7	0.9
0	0	4	2	9	5	2	2	0	0	0	0	0	0	0	0	0	0	0	0	0	7	61	26.7	30.6	8.7	9.9	219	256	8.7	10.1	10	12	21	26	15	18	8.7	9.1	104	106	0.7	1	123	371	137	141	3.7	4.6	1.4
1	1	1	7	14	6	5	3	0	2	0	0	0	0	0	0	0	0	0	0	0	2	34	18.4	22.8	6.4	7.8	59	91	12	19	9	11	23	24	49	53	8.2	8.4	92	94	1	1	95	109	125	127	4.6	4.8	1.2
0	1	4	5	3	1	1	1	0	1	0	0	0	0	0	0	0	0	0	0	0	13	54	43.3	60.4	14.4	19.5	202	294	13.3	17.9	11	21	18	24	10	10	7.8	8.3	108	110	0.7	1	103	123	141	143	4	4.2	1.9
0	1	4	3	12	5	4	3	0	0	0	0	0	0	1	0	0	0	0	0	0	5	75	24.5	27.6	8.2	8.8	26	32	2.5	2.5	26	27	20	20	101	103	8.1	8.4	86	91	13.2	13.3	143	153	132	138	4.7	4.9	4.7
0	0	4	2	11	6	1	4	0	0	0	0	0	1	0	0	0	0	0	0	0	2	62	23.5	37.7	8.1	12.9	126	168	9.8	13.5	6	9	22	25	10	11	7.5	7.6	109	112	0.4	0.5	144	181	136	139	4.1	4.3	1
0	0	1	2	14	6	5	3	1	0	0	0	0	0	0	0	0	0	0	0	0	2	64	26.6	31.4	9.2	11.3	193	201	13.3	22	9	10	23	24	18	19	8.8	8.8	106	111	0.8	1	169	169	135	139	3.7	4.6	1.6
1	0	4	2	8	5	1	1	0	0	0	0	0	0	0	0	0	0	0	0	0	8	81	34.8	39.3	11.8	12.9	112	118	5.2	6.2	11	15	23	25	18	21	7.5	7.5	105	109	1	1	101	170	138	141	3	4.1	1.5
0	0	2	9	8	5	1	2	1	0	0	0	0	0	0	0	0	0	0	0	0	3	85	26.4	31.3	7.9	9.4	108	161	8.7	13.5	14	22	14	17	49	82	6.7	8.3	124	131	2	3	99	190	153	160	3.7	4.5	1.9
0	1	1	2	11	6	1	4	0	1	0	0	0	0	0	0	0	0	0	0	0	2	90	36.7	38.6	12.9	13.3	320	321	8.1	8.8	16	18	23	24	27	29	9.6	9.6	100	103	1.8	2.1	93	141	136	141	3.4	3.6	2.4
0	0	1	2	15	6	5	4	0	0	0	0	0	0	0	0	0	0	0	0	0	2	61	31.7	31.7	10.6	10.6	211	211	5.4	5.4	11	11	22	22	16	16	8.8	8.8	103	103	0.8	0.8	130	130	136	136	3.4	3.4	1.2
0	0	1	5	3	1	1	1	0	0	0	0	0	0	0	0	0	0	0	0	0	19	54	21.2	30.1	7.4	9.6	60	118	9.7	12.4	15	16	13	15	26	29	7.4	7.4	114	115	1.4	1.5	72	136	138	142	4	4.1	2.3
0	1	1	4	12	4	4	4	0	0	0	0	0	1	0	0	0	0	0	0	0	5	46	38.9	42	13.4	14.7	107	109	5	9	8	11	22	24	17	17	7.3	8.7	110	110	1.2	1.3	160	252	135	139	3.8	4.7	0.7
0	1	1	8	14	6	4	4	0	0	0	0	0	0	0	0	0	0	0	0	0	4	75	37.7	37.7	10.7	10.7	54	54	9	9	16	17	26	28	7	16	7.1	8	103	104	2.7	5.2	105	152	142	145	2.6	3.9	2.2
0	0	1	3	13	6	4	3	0	0	0	0	0	0	0	0	0	0	1	0	0	5	90	29.1	30.2	9.2	9.4	137	143	11.7	14.3	14	18	23	26	55	61	8.6	8.8	98	99	1.3	1.5	117	151	133	134	4.4	4.6	1.1
0	1	4	4	15	6	5	4	0	0	0	0	0	0	0	0	0	0	0	0	0	3	62	9.9	31.2	2.8	10	69	149	11.1	24.2	18	36	5	20	21	46	3.6	9.5	92	124	0.6	1.7	75	240	132	145	2.5	6.1	4.4
0	0	1	2	5	1	1	3	0	0	0	0	0	0	0	0	0	0	0	0	0	3	92	30.7	31.4	10.2	10.3	312	413	14.4	21.5	16	17	15	15	20	24	7.3	7.9	107	109	1.5	1.6	180	193	132	134	5.4	7.9	1.8
0	1	4	2	15	6	5	4	0	0	0	0	0	0	0	0	0	0	0	0	1	2	50	29	29.8	9.1	9.4	140	142	7.4	8.3	21	24	16	19	45	61	7.5	8.5	98	100	7.3	10.1	82	126	132	135	4.7	5.9	1.1
0	0	1	4	14	6	5	3	1	0	0	0	0	0	0	0	0	0	0	0	0	2	91	25.6	31.9	8.3	10.7	308	358	5.8	9.1	11	14	23	25	20	24	7.6	7.6	103	108	0.5	0.7	87	120	136	141	3.3	3.9	0.8
1	1	1	2	8	5	1	2	1	0	0	0	0	0	0	0	0	0	0	0	0	11	84	39.1	39.1	13.2	13.2	209	209	24.3	24.3	18	18	16	16	42	42	6.9	6.9	112	112	2.4	2.4	115	115	141	141	4.6	4.6	1.4
0	1	4	2	9	5	2	2	1	0	0	0	0	0	0	0	0	0	0	0	0	14	41	35.5	41.4	12.2	14.6	114	162	9.2	12.6	16	18	24	26	8	8	7.6	9	91	100	0.7	0.8	113	137	131	138	3.6	3.7	1
0	1	1	7	14	5	5	4	0	0	1	0	0	1	1	0	0	0	0	0	0	3	50	33.1	37.4	11.5	12.8	139	208	18.2	19.7	10	12	21	22	27	30	8.3	8.3	108	108	2.3	2.5	99	196	134	137	4.5	5.1	1.7
0	1	4	4	15	5	0	2	0	1	0	0	0	0	0	0	0	0	0	0	0	2	53	20.6	35.2	7.3	11.9	134	173	12.8	21	15	20	17	21	13	22	6.4	8.4	99	107	1.4	1.8	97	130	130	138	5	5.7	1.3
0	1	1	2	14	6	4	4	0	0	0	0	0	0	0	0	0	0	0	0	0	6	69	43.2	43.9	14	14.1	137	157	9.2	9.2	15	20	23	26	24	27	8.5	8.6	99	102	1.2	1.5	98	133	137	140	4	4.7	1
1	0	4	3	7	5	1	1	0	0	0	0	0	0	0	0	0	0	0	0	0	3	66	30.9	34.5	10.6	11.9	104	105	9.6	9.7	13	13	22	22	11	18	7.1	7.1	110	110	0.5	0.8	139	139	142	142	3.3	3.3	1.1
0	1	4	3	10	5	1	4	0	1	0	0	0	1	0	0	0	1	0	0	0	4	79	24.6	27.3	8.3	9.1	290	306	16.4	17.9	14	18	20	22	17	19	7.3	7.6	110	114	0.6	0.8	103	119	144	150	2.9	3.5	1.1
0	1	1	2	14	6	4	4	0	1	1	1	0	0	0	0	0	0	0	0	0	2	77	36.4	38.2	12.5	12.7	154	176	10.3	12.7	11	13	33	34	33	33	9.5	9.8	96	100	1.2	1.2	107	222	139	141	3.3	3.6	1
0	1	1	9	14	6	5	3	0	1	0	0	0	0	0	0	0	0	0	0	0	7	50	37.3	40.5	11.6	12.7	148	166	10.8	14.1	20	24	17	19	66	79	6	6.3	87	91	5.9	6.9	106	120	128	132	4.5	5.2	1.1
0	1	1	4	15	6	5	4	0	0	0	0	0	0	0	0	0	0	0	0	0	4	65	24.2	34.6	8.4	12.3	135	220	10	13.1	10	13	21	24	12	21	8.1	8.6	105	109	0.7	1	117	123	136	138	4.1	4.5	1.2
0	1	1	2	10	5	2	3	0	0	0	0	0	1	0	0	0	0	0	0	0	2	63	34	35.3	12.2	12.6	258	280	8	10.4	13	17	20	23	11	14	8.7	8.9	96	100	0.7	0.9	125	159	128	131	3.8	4.1	1.3
0	1	4	3	14	6	5	3	0	0	0	0	0	0	0	0	0	0	0	0	0	3	49	27.9	34.3	10.2	12.6	234	298	17.2	27.4	11	11	25	26	12	15	8	7.9	108	108	0.9	0.9	167	130	139	139	4.1	4.1	1.2
0	0	1	2	14	6	5	3	0	0	0	0	0	0	0	0	0	0	0	0	0	2	26	32.4	35.6	10.8	12	111	146	19.9	29.6	13	20	19	21	9	10	7.6	8.8	105	112	0.5	0.7	104	174	139	142	3.3	3.8	2.3
0	0	2	3	4	1	1	2	0	0	0	0	0	0	0	0	0	0	0	0	0	30	46	32.3	40.3	10	13	246	287	16.2	16.6	8	11	23	25	13	29	7.6	7.8	115	117	0.4	0.9	130	152	144	147	3.6	3.9	1.4
0	1	1	3	15	6	5	4	1	0	0	0	0	0	0	0	0	0	0	0	0	2	72	28.9	34.1	10.1	12.2	226	280	13.9	20.4	13	13	23	24	28	31	9.2	8.4	106	109	1.6	1.7	96	96	139	140	3.9	4.4	1.6
0	1	4	2	6	4	1	1	1	0	0	0	0	0	0	1	0	0	0	0	0	22	51	29.2	35.7	10.8	12.6	169	207	10.1	15.9	11	13	19	19	9	17	7.3	7.3	117	118	0.8	1.2	161	175	144	144	4	4.5	2.2
0	0	1	5	10	4	2	4	0	1	0	0	0	0	0	0	0	0	0	0	0	10	70	20.8	34.9	7.5	12.4	47	195	2.9	13.8	14	22	21	29	15	17	9.3	27.4	99	106	0.8	1.3	169	271	139	148	2.8	3.4	1.1
1	0	4	3	3	1	1	1	1	1	1	1	0	0	0	0	0	0	0	0	0	2	34	32.6	35.4	10.7	11.5	62	110	7.2	9	16	18	19	25	17	19	6.5	7.3	98	106	0.5	0.7	48	124	138	139	2.9	3.8	6.1
0	1	1	6	10	1	5	2	0	0	0	0	0	0	0	0	0	0	0	0	0	8	84	35.1	37.1	12	12.9	101	159	10.4	12.6	13	15	24	25	33	43	7.8	8.3	105	109	1.6	1.7	129	172	139	142	3.7	4.4	1.1
0	1	1	2	3	1	1	1	1	0	0	0	0	0	0	0	0	0	0	0	0	18	54	37.8	45.2	13.3	16	191	197	10.9	14.4	13	15	27	29	9	14	7.1	8.7	91	105	0.9	1	143	181	132	142	3.1	3.6	2.3
0	1	2	3	10	6	1	3	0	0	0	0	0	0	0	0	0	0	0	0	0	10	60	26.5	32.3	8.8	10.4	439	466	8.6	11.2	11	14	26	30	10	14	7.6	8.1	97	105	0.5	0.5	100	158	136	138	3.6	4.3	1.1
0	0	1	3	3	1	1	1	3	1	0	0	0	0	0	0	0	0	0	0	0	15	79	21.5	43.9	6.1	13.8	20	255	4.2	14.8	12	24	12	24	16	23	9	12.9	108	113	1.1	1.7	83	272	140	145	4.1	4.6	3.8
0	0	1	3	13	6	4	3	0	0	0	0	0	0	0	0	0	0	0	0	0	6	65	44.7	47.9	14.7	15.4	202	205	14.5	16.4	15	15	26	26	15	15	8.3	8.3	105	105	1	1	98	98	142	142	4.1	4.1	1.2
0	1	4	4	9	5	2	2	0	0	0	0	0	0	0	0	0	0	0	0	0	3	72	28.3	28.3	9.5	9.5	446	446	22.3	22.3	14	15	18	19	21	21	7.3	7.3	80	84	0.7	0.7	60	69	106	114	5.2	5.7	2
0	1	1	4	15	1	0	1	2	0	0	0	0	0	0	0	0	0	0	0	0	4	63	23.8	35.7	7.4	11.7	65	141	6.3	23.8	6	18	14	18	15	20	9.3	9.7	114	118	0.9	1.4	129	135	137	141	5	5.3	2.8
0	1	4	2	11	6	1	4	1	0	0	0	0	0	0	0	0	0	0	0	0	10	51	29	35.8	9.7	12	249	286	12.4	21.7	14	18	23	28	10	11	8	9	97	103	0.4	0.5	61	76	134	141	3.7	3.8	1.2
0	0	4	4	13	6	4	3	0	0	0	0	0	1	0	0	0	1	0	1	0	5	18	32.6	38.6	10.2	11.6	116	175	4	29.8	14	21	13	14	18	26	6.1	8.3	100	108	1.4	2	90	351	132	135	3.3	3.8	6.1
0	1	1	2	8	5	1	2	0	0	0	0	0	0	0	0	0	0	0	0	0	2	62	22.7	25.2	7.6	8.8	20	27	4.1	5	17	25	17	19	78	100	7.6	8.1	101	110	1.8	4.3	122	148	138	142	3.5	6.1	1.7
0	1	1	4	14	6	5	3	1	0	0	0	0	1	0	0	0	0	0	0	0	8	74	31.1	35.1	11.1	11.5	206	219	11.4	13.6	12	13	23	24	28	39	6.9	7.4	104	107	0.9	1.1	122	165	137	138	3.8	4	0.8
0	0	4	4	15	6	0	4	1	0	1	0	0	0	0	1	0	0	0	0	0	3	18	29.8	31.1	10	10.5	130	144	6	6.5	8	9	20	20	7	9	6.5	6.9	104	106	0.6	0.6	104	131	133	134	4.2	4.8	1.3
0	1	1	2	8	5	1	2	0	0	0	0	0	0	0	0	0	0	0	0	0	6	84	34.4	40.4	10.8	12.7	221	266	16.7	20.3	6	16	20	25	12	14	7.4	9.2	100	109	0.9	0.9	147	250	136	140	3	4.1	2
0	1	2	7	3	1	1	1	0	1	0	0	0	0	0	0	0	0	0	0	0	22	65	21.7	22.2	7.5	7.6	195	222	11.3	11.7	18	21	29	29	79	82	8.2	8.3	92	93	3.7	3.8	96	126	136	137	3.7	4.9	0.6
1	1	1	6	11	6	1	4	0	0	0	0	0	0	0	0	0	0	0	0	0	6	63	36.7	36.7	12.6	12.6	174	174	14.5	14.5	11	14	21	22	40	44	9	9	93	94	0.9	1	107	121	122	122	5.3	5.7	1.7
0	0	1	2	11	6	1	4	0	0	0	0	0	0	0	0	0	0	0	0	0	3	78	32.9	37.9	11.7	13.5	258	307	9.2	10.5	15	20	24	26	12	14	8.8	8.8	96	101	0.5	0.6	117	159	137	138	3	3.5	1.2
0	1	1	4	15	6	5	4	0	1	0	0	0	0	0	0	0	0	0	0	0	2	56	28.9	29.9	9.8	10.5	429	512	21.9	22.3	16	18	21	27	15	20	6.9	7.8	85	100	0.6	0.8	132	175	126	134	2.9	3.3	3.7
0	0	1	2	14	6	5	3	0	0	0	0	0	0	0	0	0	0	0	0	0	2	40	36.9	37.9	11.7	12.5	113	248	12	17.3	13	20	18	20	10	12	8	8.5	103	113	0.6	0.8	98	181	139	141	2.9	3.6	0.7
0	1	1	5	3	1	1	1	0	0	0	0	0	0	0	0	0	0	0	0	0	3	48	32.4	35.4	11.2	11.9	235	249	7.8	12.8	10	13	23	25	20	28	8.1	9.3	104	111	1.6	2	98	179	136	141	3.6	4.2	1.3
0	1	4	8	14	6	5	3	0	1	0	0	0	1	0	0	0	0	0	0	0	2	62	32.4	39.6	10.6	12.6	96	181	16.2	41.7	16	24	18	23	40	42	8.4	8.8	90	97	2.4	2.9	151	325	132	136	4.1	4.5	1.9
0	1	1	3	10	6	1	3	0	0	0	0	0	0	0	0	0	0	0	0	0	6	50	38.7	40.7	13	14	227	230	8.9	11.1	14	14	24	24	8	14	8.6	8.6	108	108	0.8	0.9	97	97	142	142	3.5	3.5	2
0	0	1	3	14	6	5	3	1	0	0	0	0	0	0	0	0	0	0	0	0	3	84	26	33.2	8.6	11.1	120	176	8.9	13.5	12	13	22	24	10	10	7.2	7	110	112	0.5	0.6	94	110	141	143	3.7	4.8	2.3
0	1	1	7	15	6	0	4	0	1	0	0	0	0	0	0	0	0	0	0	0	4	63	23.3	29.8	8.5	10.8	36	128	3.3	6.8	9	13	26	28	11	13	8.2	10.2	104	105	0.5	0.8	123	273	137	142	2.9	4.3	1.3
0	0	1	2	8	4	2	2	0	0	0	0	0	0	0	0	0	0	0	1	0	14	82	25.3	36.8	8.7	12.4	77	110	12.6	21	11	18	18	20	6	15	6.9	7.5	101	105	0.6	0.8	145	202	135	137	3.7	4.3	2
0	1	1	3	14	6	5	3	0	0	0	0	0	1	0	0	0	1	0	0	0	6	32	36.1	38.8	12.5	13.5	121	162	12.8	15.5	14	15	22	22	14	19	7.6	7.7	89	93	0.8	1	229	272	126	129	3.9	3.9	2
1	1	1	2	11	6	2	3	0	0	0	0	0	0	0	0	0	0	0	0	0	2	75	29.4	29.6	8.9	9.2	171	180	9.1	10.2	16	20	24	25	28	31	8.7	9.3	105	106	1.3	1.5	138	146	143	143	4.2	5.6	1.6
0	1	1	2	6	4	1	1	0	0	0	0	0	0	0	0	0	0	0	0	0	5	57	38.9	38.9	13	13	171	206	8.7	8.7	16	16	27	27	11	11	8.6	8.6	105	105	0.8	0.8	71	71	143	143	5	5	2.3
0	0	1	4	15	6	0	3	0	1	0	0	0	0	0	0	0	1	0	0	1	4	78	32.6	35.4	10.3	11.2	46	76	21.6	25	17	21	14	18	27	34	7.1	8.6	107	116	2	2.7	115	189	140	144	3.2	4.6	1.8
0	1	4	3	11	5	4	2	0	0	0	1	0	0	0	0	0	0	0	0	0	2	46	32.3	32.7	11.8	12	162	192	8.6	10.7	10	19	21	25	7	16	7.8	8.5	103	114	0.9	1	127	532	143	151	2.9	4.2	1
0	1	4	2	3	1	1	1	0	0	0	0	0	0	0	0	0	0	0	0	0	4	31	36.1	42.1	12.1	14	94	115	9	14.1	11	15	26	27	18	32	8.2	8.2	104	109	0.8	1.2	111	138	141	143	4.2	4.6	1.2
0	0	4	2	15	6	5	4	2	0	0	0	0	0	0	0	0	0	0	0	0	2	87	22.7	32.4	7.3	10.7	158	212	12.4	16.3	10	10	21	24	11	12	7.2	7.8	108	111	0.6	0.8	109	109	138	138	4.2	4.3	1.9
0	1	1	5	14	5	5	4	0	0	0	0	0	0	0	0	0	0	0	0	0	3	53	30.1	33.8	9.9	11.4	108	281	12	18.7	11	11	16	26	12	18	8.3	8.3	106	126	0.3	0.7	107	107	138	147	4.1	4.2	1.9
1	0	4	4	9	5	1	3	0	1	2	0	0	1	1	0	0	1	0	0	0	6	80	24.1	28.3	8.8	9.6	152	190	7.4	7.5	16	17	21	23	24	25	7.3	8	111	112	1.1	1.2	272	303	146	146	3.6	4	2.3
0	0	1	2	14	6	5	3	0	0	0	0	0	0	0	0	0	1	0	0	0	14	82	30.4	32.3	9.4	9.9	205	231	11.5	13.6	12	15	19	20	14	19	7.9	7.9	101	105	1.4	2.2	128	190	135	138	4.2	4.7	1
0	1	1	4	15	6	5	4	0	1	0	0	0	1	1	0	0	0	0	0	0	6	40	25.7	28.6	8.6	9.6	180	198	11.2	13.5	11	12	24	27	17	18	8.1	8.4	101	104	0.6	0.7	94	104	135	137	3.8	4	0.7
0	0	1	2	14	6	5	3	0	1	0	0	0	0	0	0	0	0	0	0	0	2	62	30.5	35.1	10.4	11.9	309	443	7.4	11.7	13	15	22	26	12	21	7.7	8.7	106	109	0.8	1.2	113	154	141	142	3.1	4	0.9
0	0	1	2	15	6	5	4	0	0	0	0	0	0	0	0	0	0	0	0	0	5	27	39.2	42.3	13.4	14.7	247	300	5.5	10.5	17	25	15	19	11	12	9.1	9.1	103	104	0.6	0.8	117	210	134	139	4.8	5.1	1.9
0	0	1	2	6	4	1	1	0	0	0	0	0	0	0	0	0	0	0	0	0	13	53	35.2	39	11.6	12.9	155	166	12.1	12.6	11	14	23	25	10	13	7.6	8	111	114	0.7	1	109	130	143	148	3	4.2	1.1
0	1	1	4	15	5	0	2	1	0	0	0	0	0	0	0	0	0	0	0	0	2	62	34.9	43.2	12	14.6	147	178	12.9	19.8	12	15	21	23	25	26	8.5	8.5	105	108	1	1.2	113	130	137	137	4.1	4.7	1.2
0	1	2	2	11	5	4	2	0	0	0	0	0	0	0	0	0	0	0	0	0	12	65	17.2	26	5.5	8.9	144	167	6.3	8	16	23	21	22	44	47	7	7.3	99	106	1.3	1.4	287	367	138	139	4.5	4.6	1.6
0	1	4	3	14	6	4	4	0	0	0	0	0	0	0	0	0	0	0	0	0	4	71	39.9	39.9	13.4	13.4	218	218	10.1	10.1	13	18	33	37	22	30	8.6	9.2	83	86	0.8	1.3	88	133	130	133	3.7	4.1	0.7
1	1	1	10	7	4	1	2	0	1	0	0	0	0	0	0	0	0	0	0	0	11	50	20.8	31.3	6.7	11.2	36	84	1.5	6.2	16	24	20	25	24	44	8.6	12.5	108	113	1.7	4.1	90	113	144	149	4.5	6.3	4.1
0	1	1	9	14	6	4	4	0	1	0	0	0	0	0	0	0	0	0	0	0	10	72	36.6	48.4	11.8	16	105	130	26.5	73.3	13	21	19	23	17	23	7.1	9	100	110	0.7	1.1	72	373	132	142	3.4	4.3	1.6
0	1	4	9	12	6	2	4	0	0	0	0	0	0	0	0	0	0	0	0	0	21	68	27.6	36.5	8.9	11.8	172	201	24.3	29	13	17	17	21	19	22	8.6	8.6	101	103	1.7	2	189	189	135	135	4	4	1.7
0	0	1	2	14	6	5	3	0	0	0	0	0	0	0	0	0	0	0	0	0	2	21	28.1	31	9.4	10	370	399	17.5	27.7	11	26	11	22	11	30	7.3	8	113	123	0.8	1.3	100	341	142	152	3.3	4.6	0.7
0	1	1	2	15	6	5	4	0	1	0	0	0	0	0	0	0	0	0	0	0	2	74	26.6	30.8	8.4	10	166	190	8.2	13.4	7	9	25	25	16	19	8.5	8.5	106	108	0.9	1.2	85	85	140	140	4.5	4.5	1.1
0	1	4	4	13	4	5	3	0	0	0	0	0	0	0	0	0	0	0	0	0	2	66	26.7	30.7	8.6	10.1	273	374	17.4	19	12	15	20	29	21	27	7	8.2	101	107	0.9	0.9	182	371	134	140	3.7	6.3	1.5
0	1	1	2	13	6	3	4	0	0	0	0	0	0	0	0	0	0	0	0	0	5	77	33.7	34.3	10.2	10.3	328	358	8.4	10.9	15	15	26	26	32	35	9.3	9.3	105	105	1.2	1.5	133	133	146	146	3.5	3.5	1.4
0	1	1	2	9	4	2	3	0	0	0	0	0	0	0	0	0	0	0	0	0	4	48	28.7	34.6	9.8	10.9	216	224	8.8	10.1	7	10	28	29	6	6	7.4	7.8	98	102	0.7	0.7	102	108	132	134	3.6	3.9	0.9
0	1	1	3	10	5	1	4	0	1	0	0	0	0	0	0	0	0	0	0	0	4	27	35.8	42.7	13.2	15	255	295	17	30.2	14	15	22	24	14	16	8.2	8.3	105	107	0.7	0.8	96	112	138	139	4.5	4.8	1.2
0	1	4	3	10	4	2	4	0	0	1	0	0	0	1	0	0	0	0	0	0	3	55	36.2	39.5	11.8	13.4	252	266	12.9	20.3	10	15	22	26	19	19	8	8.5	105	105	0.6	0.9	121	142	137	138	3.9	4.4	2.3
0	1	4	6	15	1	0	1	1	0	0	0	0	0	0	0	0	0	0	0	0	3	47	27	30.7	9.1	10	181	264	6.8	17.7	8	10	24	26	13	17	8.1	8.1	108	112	0.8	0.9	145	145	139	140	4.3	4.5	1.1
0	0	1	4	15	6	5	4	1	0	0	0	0	1	0	0	0	0	0	0	0	2	76	25.2	26.1	8	8	256	256	25.1	25.1	14	16	16	17	28	31	7.6	7.6	108	110	1.2	1.2	137	137	136	138	3.2	3.6	1.5
0	1	3	2	13	5	5	3	1	0	0	0	0	0	0	0	0	0	0	0	0	2	79	23.5	30	8.1	10.2	178	321	6.7	12	10	11	26	28	8	9	8.1	8.1	107	111	0.7	0.8	78	78	141	143	4.1	4.7	0.8
0	1	1	2	15	6	5	4	1	0	0	0	0	0	0	0	0	0	0	0	0	2	45	29.2	32.4	10	10.5	262	322	19.5	27.8	14	18	14	17	38	38	7.4	7.6	111	113	1.9	2.2	129	129	138	141	4.2	4.3	2
0	1	1	2	14	6	5	3	0	0	0	0	0	0	0	0	0	0	0	0	0	2	61	32	36.5	11.4	13.3	101	124	13	14	10	14	22	25	18	18	7.9	8.4	105	109	0.9	1	129	129	136	141	4.1	4.4	1.5
0	1	1	2	7	4	1	2	1	0	0	0	0	0	0	0	0	0	0	0	0	6	60	41.8	46.1	14.1	15.6	194	321	9	21.5	14	19	16	20	11	14	8	8.4	103	108	1	2.2	89	193	133	138	3.6	4.7	1.1
0	0	1	2	10	6	1	3	0	0	1	0	0	0	1	0	0	0	0	0	0	4	79	41.8	43.6	14.2	15.1	248	262	24.1	27.3	15	20	19	22	14	17	7.4	7.9	103	103	0.6	0.7	155	204	136	138	3.7	3.9	1.6
0	1	4	5	6	4	1	1	0	0	0	0	0	0	0	0	0	0	0	0	0	7	78	29.3	35.1	10	12	384	514	22.6	27.9	9	13	20	22	22	25	7.1	7.6	104	106	0.8	1.2	98	131	131	134	5	5.3	1.1
1	0	1	6	9	5	1	3	0	0	0	0	0	0	0	0	0	1	0	0	0	11	79	28.8	32.7	8.9	10.3	408	409	12.4	16.3	15	23	8	13	39	42	6.7	8.1	113	116	1.2	1.2	42	100	140	141	3.4	4	1.6
0	0	1	2	14	6	4	4	0	0	0	0	0	1	0	0	0	0	0	0	0	4	85	32.5	37.4	10.3	11.8	351	422	21.7	29.6	17	24	18	21	34	38	7.5	8.7	94	103	1.6	1.8	127	166	129	135	3.6	6.5	1.3
0	1	4	5	15	6	5	4	1	0	0	0	0	0	0	0	0	0	0	0	0	3	62	36.4	37.5	12.1	12.2	190	198	17.1	24.2	12	13	22	23	17	19	7.8	8	108	109	0.8	0.9	131	131	137	141	4.1	4.5	1.8
1	0	1	3	5	1	2	2	0	1	0	0	0	0	0	0	0	0	0	0	0	6	80	23.9	31.4	7.7	10.5	124	148	19.1	19.8	13	18	17	23	26	29	7.2	8.4	105	114	1.2	1.6	44	315	139	142	4	5.9	1.6
1	0	4	2	3	1	1	1	0	0	0	0	0	0	0	0	0	0	0	0	0	4	73	20.5	34.3	8.2	11.3	322	509	16.8	24.9	20	20	19	19	33	35	7	7	103	103	1	1.2	167	167	137	137	4.6	4.6	2.1
0	1	4	7	15	6	5	4	0	0	0	0	0	0	0	0	0	0	0	0	0	3	77	24.3	30.4	8.6	10.5	30	94	4.1	8.6	12	12	20	21	23	25	8.1	8.7	107	112	1.3	1.7	127	127	135	140	3.9	5.4	1.3
0	1	1	6	3	1	1	1	0	0	0	0	0	0	0	0	0	0	0	0	0	29	84	41.2	43.9	14.4	15.1	135	159	11.2	13.4	13	17	20	23	13	20	6.7	7.7	103	108	0.7	1.5	116	179	137	138	3.1	4.6	1.2
1	0	1	3	3	1	1	1	0	1	0	0	0	0	0	0	0	0	0	0	0	5	79	26.6	28.7	9.3	10.1	118	125	19.5	23.9	12	13	21	22	29	30	6.8	8	109	110	1.5	1.6	162	185	139	140	4	4.1	1.9
0	1	1	7	15	6	5	4	0	1	0	0	0	1	0	0	0	0	0	0	0	3	78	26.7	29.7	8.5	9.5	345	375	8.5	15.9	16	20	20	25	55	56	9.1	9.4	92	93	2	2.1	109	219	133	134	4.1	5.4	2
0	0	1	2	14	6	5	3	0	0	0	0	0	0	0	0	0	0	0	0	0	4	80	34.1	37	10.3	12.1	127	209	1	21.3	11	13	17	27	16	17	6.9	8.3	103	112	0.6	0.7	92	121	137	142	3	3.3	0.8
1	0	1	4	5	1	2	2	1	1	0	0	0	0	0	0	0	0	0	0	0	9	90	26.4	27.2	8	8.5	678	739	14.4	16.2	13	16	23	24	24	27	7.9	8.8	105	109	1.1	1.1	119	134	141	141	3.8	3.9	0.9
0	0	1	5	4	1	1	2	0	2	0	0	0	0	0	0	0	0	0	0	0	3	82	29.5	29.5	10.1	10.1	97	97	6.2	6.2	13	13	25	25	82	87	7.9	7.9	116	121	2.3	2.5	230	230	146	158	2.8	4.5	2
0	0	1	3	14	6	5	3	0	0	0	0	0	0	0	0	0	0	0	0	0	5	87	42.1	48.3	13.4	15	278	317	16	27.7	13	17	19	21	18	22	8.4	8.9	93	102	1.3	1.8	155	195	129	138	4.3	4.7	2
0	1	1	2	14	6	5	3	0	0	0	0	0	0	0	0	0	0	0	0	0	2	72	34.4	37.1	11.1	12	188	215	18.9	19.3	13	13	23	24	22	23	7.3	6.7	105	106	0.9	0.9	117	117	136	139	3.5	4.5	1.3
0	1	1	4	4	1	1	2	0	1	0	0	0	1	0	0	0	0	0	0	0	4	53	34.5	47.4	10.9	15.3	266	369	3.1	11.4	5	18	16	20	33	44	7.4	7.4	98	108	1.6	1.9	89	133	133	137	3.5	4.3	1.1
1	0	1	2	9	5	1	3	0	0	0	0	0	0	0	0	0	0	0	0	0	3	90	24.4	31.6	8.6	10.6	280	391	14.8	18.8	16	21	15	18	29	37	8	8.5	98	100	1.1	1.9	249	429	127	130	4.5	5.9	1.8
0	1	1	7	15	6	5	4	1	0	0	0	0	0	0	0	0	0	0	0	0	2	50	35.9	40.3	12.2	13.5	173	197	7.4	19.7	18	21	17	19	22	31	7.9	8.4	97	102	1.2	1.8	144	237	132	135	3.7	4.6	1.7
0	0	4	2	11	6	1	4	0	0	0	0	0	0	0	0	0	0	0	0	0	18	47	34.3	34.3	11.1	11.1	149	149	13	13	14	14	22	22	11	11	7.9	7.9	104	104	0.6	0.8	137	137	136	136	3.5	3.5	1
1	0	1	10	9	5	2	2	2	0	0	0	0	1	0	0	0	0	0	0	0	5	67	30.9	32	10	10.2	50	66	11.2	11.5	15	15	19	21	80	83	9	9.1	110	113	4.1	4.3	121	131	142	144	3.2	3.6	1.8
1	0	1	5	4	1	1	2	1	0	0	0	0	0	0	0	0	0	0	0	0	11	48	32.3	38.3	10.7	13.1	36	43	6.8	12.7	31	33	11	14	94	110	8.1	8.5	92	98	10.9	11.5	208	297	132	137	4.4	5.7	1.1
0	1	1	2	4	1	1	2	0	0	0	0	0	0	0	0	0	0	0	0	0	3	83	50.6	52.8	16.9	17.4	579	608	14.3	14.5	14	16	22	22	21	26	8.3	8.7	102	104	0.6	0.8	97	106	134	138	4.2	4.3	1.2
1	0	1	5	15	6	5	4	0	0	0	0	1	0	0	0	0	0	0	0	0	5	52	16.4	21.1	5.8	7.6	5	28	0.2	0.6	10	10	26	26	26	26	8	8	108	108	0.8	0.8	164	164	140	140	4.2	4.2	1.9
0	0	1	8	13	6	4	3	1	0	0	0	0	0	0	0	0	0	0	0	0	6	90	37.6	40.4	12.2	13.4	122	146	10.4	33.6	11	15	19	23	15	23	7.9	8.7	98	106	1	1.5	127	226	136	138	3.6	4.8	2.7
0	1	1	11	3	1	1	1	1	0	0	0	0	0	0	0	0	0	0	0	0	4	68	22.8	31.4	8	11	141	155	9.5	12.8	10	10	23	23	8	9	8.1	8.3	110	110	0.7	0.7	93	93	138	138	4.2	4.6	1.3
0	0	2	4	6	4	1	1	0	0	0	0	0	0	0	0	0	0	0	0	0	6	85	25.5	26.7	8.3	8.4	135	253	13.5	14.8	13	17	24	25	26	27	8.8	9.4	101	107	1.7	1.7	134	169	137	141	3.6	4.6	1.6
0	0	1	4	15	6	5	4	3	1	1	0	0	0	0	0	0	0	0	0	0	5	69	28.9	34.6	10.1	11.8	165	425	16.6	26	13	15	20	26	29	39	8.1	8.9	103	111	1.1	1.5	120	202	139	141	3.5	4.5	1.3
0	1	1	2	4	1	2	1	0	1	0	0	0	0	0	0	0	0	0	0	0	9	50	21.2	22.3	6.9	7.1	56	78	10	13.1	16	17	23	24	27	35	8.8	9.2	91	92	1.8	2	102	162	127	129	3.7	4.3	3.2
0	0	2	4	15	6	5	4	0	0	0	1	0	0	0	0	0	0	0	0	0	3	87	33.9	33.9	10	10	101	101	6.5	6.5	15	16	27	30	68	80	9.3	9.7	94	97	2.4	2.6	118	125	139	141	4.6	5.2	1.7
0	0	1	3	15	6	5	4	0	1	0	0	0	1	0	0	0	0	0	0	0	4	79	26.6	28.9	8.6	9.4	169	178	5.3	10.6	13	15	23	26	13	15	8.1	8.5	105	109	0.6	0.7	127	155	140	142	3.1	4.6	0.8
1	1	2	2	14	6	5	3	0	0	0	0	0	1	0	0	0	0	0	0	0	6	47	21.1	26.8	6.9	8.8	181	241	15.8	21.9	12	17	35	39	16	26	9.2	9.6	86	87	0.6	1.9	93	112	134	134	4	4.4	0.6
0	1	4	2	14	6	5	3	0	0	0	0	0	0	0	0	0	0	0	0	0	3	60	36.7	37.7	11.9	12	218	263	17.4	18.1	14	18	23	26	11	11	8	8.4	106	106	0.7	0.9	96	102	142	143	3.8	4	2.9
1	1	1	4	3	1	1	1	0	0	0	0	0	0	0	0	0	0	0	0	0	6	79	37.4	42.5	12.8	13.4	118	152	11.2	16.9	14	21	20	23	22	24	7.8	8.7	104	111	1	1.2	117	240	138	146	3.4	4.2	2.1
0	1	2	7	13	6	4	3	0	1	0	0	0	0	0	0	0	0	0	0	0	9	42	31.4	36.9	11.3	12.6	177	207	8.1	12.6	20	25	17	22	83	169	8.1	8.7	89	93	2.6	4.9	97	163	121	131	5.6	8.2	1.7
0	0	1	6	15	6	5	4	1	1	0	1	0	0	0	0	0	0	0	0	0	2	62	29.2	46.3	11.4	14.1	158	480	17.7	27.5	15	16	17	20	20	27	8.2	8.5	108	108	0.9	1.1	200	257	135	139	4.5	4.8	2.2
0	0	1	3	15	6	5	4	0	1	0	0	0	0	0	0	0	0	0	0	0	3	90	25.7	28.1	8.2	9.1	127	145	3.2	4.8	6	8	24	26	16	20	7.2	7.7	108	113	0.7	0.9	105	123	138	139	3.9	4.2	1.1
0	0	1	2	13	6	4	3	0	0	0	0	0	0	0	0	0	0	0	0	0	5	81	28.3	36	10.1	11.9	76	201	7.3	10	11	12	19	27	10	14	8.8	8.8	105	114	0.7	1.2	93	107	140	140	3.8	4.2	0.9
0	0	1	4	14	6	5	3	2	1	0	0	0	0	0	0	0	0	0	0	0	3	69	41.3	41.9	13.6	13.7	245	251	9.9	11.2	13	19	21	26	40	43	8.7	9.3	102	103	2.2	2.5	148	268	137	139	3.6	4.6	1
0	1	4	2	15	6	0	4	2	0	0	0	0	0	0	0	0	0	0	0	0	2	74	31.3	32.2	9.7	9.8	354	429	19.1	20.4	15	15	41	43	77	80	8.7	8.8	84	84	1.7	1.7	173	192	135	137	4.9	5.2	1.6
0	1	1	3	15	1	0	1	1	0	0	0	0	1	0	0	0	0	0	0	0	3	62	34.6	44	11.7	14.6	137	190	7	11.8	14	18	22	23	18	20	7.8	8.2	100	101	1.1	1.4	146	186	132	133	4.5	6.7	1.5
0	1	1	2	12	6	5	1	0	0	0	0	0	0	0	0	0	0	0	0	0	6	56	43	45.1	14.9	16.3	195	238	23.3	28.6	17	19	22	22	28	29	8.5	8.9	102	103	0.8	0.9	145	164	138	140	3.1	4	2.3
0	0	4	5	8	6	1	1	0	0	0	0	0	0	0	0	0	0	0	0	0	8	81	37.5	37.7	12.4	12.6	113	146	10.2	11	8	12	22	22	11	13	8.1	8.1	101	106	0.8	0.9	132	135	131	140	4.4	4.4	0.5
0	1	1	2	13	5	4	4	0	1	0	0	0	1	0	0	0	0	0	0	0	9	83	29	29	9.4	9.4	373	373	13.9	13.9	17	19	27	30	27	28	8.5	9.1	96	101	1.4	1.5	228	246	139	143	4.1	4.1	2.2
0	0	2	5	10	4	2	4	0	1	0	0	0	0	0	0	0	0	0	0	0	10	52	33.3	36	9.1	10.5	168	231	7.8	12.9	9	13	20	25	26	27	8.6	9.4	109	112	2.4	3	150	156	139	141	4	4.9	1.5
0	0	1	2	15	6	5	4	0	0	0	0	0	0	0	0	0	0	0	0	0	3	69	21.8	35	7.6	12.2	165	280	6.5	12.9	9	12	25	27	14	28	9.2	9.7	106	115	0.5	0.7	113	128	139	145	3.9	4.5	0.9
0	1	4	3	3	1	1	1	1	0	0	0	0	0	0	0	0	0	0	0	0	4	41	14.7	45.6	5	15.1	34	146	5.7	16.3	6	15	20	25	12	20	7.5	11.1	106	122	0.6	0.9	60	172	136	150	3.1	6.7	1.7
1	1	1	4	14	6	4	4	0	1	0	0	0	1	0	0	0	0	0	0	0	9	73	20.1	36	6.7	12.3	212	317	19.3	42.2	16	22	22	28	47	56	6.9	8.7	90	94	1.7	2.2	160	312	130	134	3.9	4.8	1.3
0	1	1	2	14	6	5	3	1	0	0	0	0	0	0	0	0	0	0	0	0	2	83	27.3	28.7	9.6	9.8	118	150	6.4	6.7	9	9	22	22	15	20	7.5	7.5	111	116	0.7	0.8	143	143	137	137	4.8	4.8	1.5
0	1	1	3	13	6	4	3	0	0	0	0	0	0	0	0	0	0	0	0	0	7	61	37.3	37.3	11.7	11.7	181	181	17.1	17.1	14	14	26	26	28	28	8.5	8.5	102	102	1.3	1.3	101	101	138	138	4.4	4.4	1.4
0	1	4	10	8	5	1	2	1	1	0	0	0	0	0	0	0	0	0	0	0	13	62	22.7	40.9	7.7	13.1	77	179	10.7	15.3	17	23	18	22	16	22	11.2	11.2	112	114	1.5	2.6	180	183	149	150	3.6	4.3	6.2
1	0	1	2	9	5	2	2	0	1	0	0	0	0	0	0	0	0	0	0	0	2	43	27.4	30.7	8.6	9.9	331	347	10.4	13.6	7	15	34	50	15	30	8.3	9.8	61	84	0.3	0.4	71	114	121	128	1.8	5.1	1.2
0	1	1	10	3	1	1	1	0	1	0	0	0	0	0	0	0	0	0	0	0	5	83	18.4	33.2	6.5	11.8	113	191	9.3	20.1	12	18	23	25	43	46	8	8.8	107	110	1.6	1.6	118	238	140	145	3.8	4.8	1.6
0	1	4	2	14	6	4	4	2	0	0	0	0	0	0	0	0	0	0	0	0	2	73	28.4	37	9.7	12.8	82	122	8	16.1	10	12	21	24	15	17	8.8	7.8	104	106	1	1.2	114	114	137	137	4.3	4.5	1.3
0	0	1	2	13	6	4	3	0	0	0	0	0	0	0	0	0	0	0	0	0	2	76	29.1	29.1	9.1	9.1	197	197	8.8	8.8	17	17	30	30	26	26	8.5	8.5	96	96	5	5	73	73	138	138	5	5	0.7
1	0	1	3	14	6	5	3	0	0	0	0	0	0	0	0	0	0	0	0	0	8	74	25.1	31.3	7.9	9.7	201	291	5.6	13	14	20	18	21	39	45	8.5	9.1	99	105	2.2	2.4	84	99	134	137	3.5	4.1	1.5
0	1	1	3	14	6	4	4	0	0	0	0	0	0	0	0	0	0	0	0	0	6	63	27.2	30	9.4	9.9	211	226	9.2	9.5	6	11	31	32	34	36	9	9.1	110	110	1	1.1	123	143	144	147	4.2	4.5	1.2
0	1	3	4	7	5	1	1	0	2	0	0	0	1	0	0	0	0	0	0	0	4	26	22.3	26.7	6.7	7.3	115	137	9.6	13	9	16	19	22	7	11	6.4	6.9	107	110	0.8	1.9	124	164	137	139	3.4	3.9	1.2
0	1	1	4	13	6	4	3	0	0	0	0	0	0	0	0	0	0	0	0	0	3	74	23	23.9	6.8	7.2	228	289	8.7	9.7	15	18	17	19	23	31	8.5	8.7	103	109	1.5	2.4	158	382	131	138	4.5	8.3	2.1
0	0	1	2	7	1	2	4	0	1	1	0	0	1	0	0	0	0	0	0	0	11	36	34.3	34.3	10.9	10.9	437	437	33.6	33.6	16	16	25	25	25	25	8.1	8.1	103	103	0.7	0.7	78	78	139	139	4.8	4.8	2
0	1	1	2	8	5	1	2	0	0	0	0	0	0	0	0	0	0	0	0	0	3	58	29.1	38.7	10.5	13.3	316	386	15.5	23.7	10	13	26	32	13	20	7.8	9.3	96	103	0.7	1.1	129	174	135	137	3.8	4.4	1.8
0	0	1	2	14	6	5	3	0	0	0	0	0	0	0	0	0	0	0	0	0	2	90	24	36.9	8.7	11.7	113	167	10.6	15.5	11	17	22	27	17	25	7.1	9.4	102	110	0.6	0.7	124	159	140	143	3.8	4.3	1
0	1	1	3	14	6	5	3	0	2	0	1	0	1	0	0	0	0	0	1	0	6	52	21.2	24.6	6.7	8.1	90	175	15.8	19.9	16	36	16	29	42	57	7.9	9	74	82	3.6	4.9	90	186	125	129	4.9	6.8	2.2
0	0	1	4	3	1	1	1	0	0	1	0	0	1	0	0	0	0	0	0	0	10	52	19.9	32	6.3	10.1	131	204	9.1	12.3	14	17	19	23	32	33	6.9	7.1	99	105	0.6	0.8	87	145	127	139	4.6	6	1.4
0	0	1	5	15	6	5	4	0	0	0	0	0	1	0	0	0	0	0	0	0	2	69	19.8	32.3	6.8	11.5	206	239	6.5	10.2	10	10	24	27	15	16	6.2	7.1	106	109	0.6	0.6	77	77	139	139	4	4.4	1.1
1	1	3	5	11	6	2	3	0	0	0	0	0	0	0	0	0	0	0	0	1	3	76	25.4	28.8	7.9	8.9	221	294	12.1	14.5	22	32	14	24	82	88	8.2	8.6	85	88	5.1	5.7	52	133	126	130	4.4	5.2	4.7
0	1	1	3	6	4	1	1	0	0	0	0	0	0	0	0	0	0	0	0	0	3	58	27.4	28.6	8.3	8.9	256	294	6.7	7	11	11	25	28	18	22	8.3	8.3	103	108	1	1	110	159	137	140	4.1	4.5	1.1
0	1	4	14	3	1	1	1	0	2	0	0	0	1	0	0	1	0	1	1	1	48	44	29.9	35.6	10.1	11.9	27	54	6	20.5	19	23	13	16	59	63	5.9	6.4	92	99	3.9	4.1	83	207	125	128	4.3	6.4	2
0	1	1	2	10	5	1	4	0	0	0	0	0	0	0	0	0	0	0	0	0	2	29	35.2	41.2	12.8	14.1	366	382	13.4	16.1	15	17	23	26	8	18	8.2	9	100	100	0.7	0.9	106	159	136	140	3.8	4.1	1.2
0	0	2	4	14	6	5	3	0	0	0	0	0	1	0	0	0	0	0	0	0	2	54	25.9	32.9	8.3	10.6	218	268	5.2	8.1	10	16	19	22	11	19	7.4	9	102	114	0.9	1.5	119	281	136	140	3.4	4.4	2.6
0	1	1	3	6	4	1	1	0	0	0	0	0	0	0	0	0	0	0	0	0	4	62	37.5	37.5	13.1	13.1	178	178	11.3	11.3	14	14	25	25	8	8	9.2	9.2	104	104	0.6	0.6	95	95	139	139	4.3	4.3	1.9
0	1	4	3	14	5	5	4	0	0	0	0	0	0	0	0	0	0	0	0	0	3	69	36.8	39.4	11.9	12.6	112	126	7.6	11.1	13	14	28	31	36	46	8.6	9	99	99	2	2.1	97	124	135	140	4.1	4.5	1.2
0	1	1	3	15	6	5	4	0	0	0	0	1	1	0	0	0	0	0	0	0	2	66	25.7	25.7	8.6	8.6	172	172	13.4	13.4	12	12	22	22	27	27	8.8	8.8	104	104	1.5	1.5	104	104	134	134	4.3	4.3	1.2
0	1	1	3	9	5	1	3	0	0	1	0	0	1	0	0	0	0	0	0	0	9	63	30.7	33.1	10	11.2	133	138	8.5	9.7	14	19	14	20	18	22	7	7.3	105	111	0.6	1	109	163	136	140	3.2	3.6	1.9
1	1	1	11	8	6	1	1	0	0	0	0	0	0	0	0	0	0	0	0	0	3	65	21.3	22.2	6.8	7	18	33	0.2	0.4	20	26	19	24	98	104	6.1	6.3	98	100	6.3	6.6	50	103	137	140	4.4	7.7	2.3
0	1	1	5	14	6	5	3	0	0	0	0	0	1	0	0	0	0	0	0	0	3	63	36.3	36.3	12.6	12.8	497	543	40	44	17	20	18	22	8	13	7.8	8.1	100	103	0.5	0.6	114	151	133	137	3.7	4.6	1.2
1	1	1	4	15	6	0	1	0	0	0	0	0	0	0	0	0	0	0	0	0	3	46	29	31.3	8.8	9.7	293	330	8.8	15.8	24	27	21	26	66	71	10.3	11.4	88	92	11.7	12.2	173	301	129	137	5.1	7.4	1.7
0	0	1	4	14	6	5	3	0	0	0	0	0	0	0	0	0	0	0	0	0	5	75	29.8	32.1	9.7	10.2	311	375	8.8	15.8	12	18	16	19	8	10	7.4	7.4	101	105	0.3	0.6	74	86	130	132	3.9	4.6	1.4
0	1	2	10	14	6	5	3	1	2	0	0	1	1	0	0	0	0	0	0	0	7	53	18.6	31.8	5.9	10.7	64	103	7.3	17.4	10	22	8	24	21	33	8.2	9.5	104	111	1.1	2.1	92	360	134	143	5.1	6.2	1.4
0	0	4	5	14	6	5	3	0	1	0	0	0	0	0	0	0	0	0	0	0	4	40	29.6	31.5	10.2	11	89	94	10.4	13.4	8	11	26	27	7	9	6.5	7.7	95	97	0.6	0.6	84	97	126	132	3.4	4	1.4
1	1	2	2	14	5	5	4	0	0	0	0	0	0	0	0	0	0	0	0	0	3	51	34.5	35.4	10.9	11.6	150	156	9.3	9.6	19	23	17	21	22	46	10.2	11.4	106	107	1.4	2.5	78	95	140	142	4.8	6.4	3.7
0	1	1	7	15	6	5	4	1	0	0	0	0	0	0	0	0	0	0	0	0	2	84	27.4	32	9.3	10.8	112	136	12.4	16.7	12	14	21	22	21	22	7.8	7.8	108	110	1.2	1.2	132	132	139	140	3.6	4.1	1.3
0	1	1	4	13	5	4	4	1	0	0	0	0	0	0	0	0	0	0	0	0	3	79	22.3	30.6	7.5	10.2	88	208	13.1	15.9	9	11	21	22	15	17	7.6	8.3	111	113	0.7	0.8	110	111	138	141	3.9	4.3	1.3
0	0	1	2	3	1	1	1	0	0	0	0	0	0	1	0	0	0	0	0	0	3	61	27.4	27.6	9.7	9.8	283	370	11.8	14.8	14	16	19	21	15	17	9.2	9.6	102	108	1.2	1.4	106	163	133	141	2.8	3.9	1.4
0	1	4	2	15	6	0	3	0	1	0	0	0	1	0	0	0	0	0	0	0	3	68	29.4	33.4	9.9	11.3	150	167	8.6	16.5	16	21	12	14	58	68	6.5	7	101	104	2.4	3.2	96	147	133	136	3.3	4.3	2.2
0	1	1	2	11	6	1	4	0	0	0	0	0	0	0	0	0	0	0	0	0	8	83	34.1	39.5	11.5	13.3	243	303	14.7	29.2	11	16	25	27	29	40	8.6	8.7	103	105	0.7	0.9	107	213	139	139	4.4	5.1	1.2
0	1	4	6	15	6	5	4	0	0	0	0	0	0	0	0	0	0	0	0	0	5	80	34.7	39.4	11	12.4	255	293	8.1	12.7	22	26	20	23	88	101	7	8.1	89	96	8.3	9.8	85	171	130	134	4.5	6.6	1.4
1	1	4	12	3	1	1	1	0	1	0	0	0	1	0	0	0	0	0	0	0	3	62	28.4	39.4	8.8	12.4	19	104	9.9	14.8	22	28	16	21	188	217	7.9	8.7	109	120	6.2	7.4	104	272	152	165	4.9	6.2	3.2
0	0	1	2	14	6	4	4	0	0	0	0	0	0	0	0	0	0	0	0	0	4	87	28.2	39.8	9.1	13.1	140	238	6.5	10.9	11	12	22	35	13	20	5.9	9.9	106	119	0.4	0.8	114	132	142	148	3.6	4.6	2
0	1	1	2	3	1	1	1	0	0	0	0	0	0	0	0	0	0	0	0	0	14	55	39.9	45.6	13.2	15.1	175	193	9.1	12.5	14	19	22	25	11	14	8.3	9	99	107	0.8	0.9	88	127	135	143	3.8	4.5	0.7
0	1	1	3	14	6	5	3	1	0	0	0	0	1	0	0	0	0	0	0	0	2	81	32.2	36.5	10.7	12	126	135	18.6	18.6	14	14	22	23	22	24	8.1	8.1	105	107	1.2	1.3	198	247	138	139	3.6	3.7	2
0	0	4	2	13	6	4	3	0	0	0	0	0	0	0	0	0	0	0	0	0	2	69	35.9	44.7	12	15	186	191	9.6	11.9	15	23	15	22	12	30	7	8.6	114	118	0.9	1.4	129	395	144	151	2.7	6	1.8
0	0	1	2	13	6	4	3	0	1	0	0	0	0	0	0	0	0	0	0	0	2	77	20.6	26.2	6.4	8.6	183	224	18.9	20.6	14	14	19	22	59	66	7.4	8.1	105	109	0.7	0.7	135	140	136	138	4	4.5	3.3
0	1	1	3	14	6	5	3	1	0	0	0	0	0	0	0	0	0	0	0	0	3	64	34.9	41	11.3	13.5	157	247	14.1	31	13	15	25	26	13	15	8.1	8.8	104	106	0.9	1	145	145	139	141	2.9	4	1.6
0	0	1	2	5	1	3	1	0	1	0	0	0	0	0	0	0	0	0	0	0	2	87	34	34	12	12	140	140	14.1	14.1	13	15	25	27	17	18	8.4	8.5	89	90	1	1	106	107	129	130	3.4	3.6	0.9
0	1	1	4	14	6	5	3	0	0	0	0	0	0	0	0	0	0	0	0	0	5	77	23.6	32.6	7.6	8.2	278	413	8.1	9.5	16	20	21	24	81	83	6.4	7.5	99	107	3.8	4.5	119	129	139	140	4	4.3	1.8
0	1	4	5	14	6	4	4	1	0	0	0	0	0	0	0	0	0	0	0	0	2	73	22.5	41.9	7.5	14	117	139	6.7	9.6	12	15	22	24	17	19	8.5	8.5	111	113	1.1	1.1	108	124	143	147	3.1	4.2	1.3
0	1	1	2	10	4	4	2	0	0	0	0	0	0	0	0	0	0	0	0	0	2	41	28.4	30	9.5	9.9	173	193	7	11.2	14	15	25	25	3	6	8.4	8.9	95	104	0.4	0.7	88	103	131	139	3.7	4.3	1.1
0	1	1	10	9	5	1	3	1	2	0	0	0	1	1	0	0	0	0	0	0	5	82	39.2	43.8	12.1	14.5	129	176	12.8	16.8	14	21	14	16	31	36	7.8	8.9	107	115	1.6	2	92	120	142	144	4	4.6	1.7
0	0	4	3	15	6	5	4	0	0	0	0	0	0	0	0	0	0	0	0	0	3	46	36.6	42.6	11.8	13.6	410	426	17.5	18.7	17	20	21	22	11	12	8.7	9.1	98	104	0.6	0.7	90	129	134	138	4.2	5.5	1
0	0	1	2	13	6	4	3	0	0	0	0	0	0	0	0	0	0	0	0	0	3	90	21.2	31.1	7.3	10.4	115	159	9.4	12.1	12	13	27	28	28	29	9	9	97	98	0.7	0.8	135	149	133	134	4.1	4.4	1.5
0	1	4	2	9	4	1	4	0	0	0	0	0	0	0	0	0	0	0	0	0	8	33	35.7	36.9	12.8	13.6	108	171	5.7	11	13	18	27	32	19	27	8	8.5	89	98	1.1	1.8	75	93	133	138	3.1	3.9	2
0	0	1	2	15	6	5	4	3	0	0	0	0	0	0	0	0	0	0	0	0	2	80	24.7	35.6	8.1	11.8	164	335	12.4	23.5	14	16	21	22	21	27	7.9	8.1	97	106	0.9	1.1	133	133	130	135	4.5	4.7	1.5
1	1	1	2	15	6	5	4	0	0	0	0	0	0	0	0	0	0	0	0	0	2	47	39.7	43.8	13.4	14.8	225	331	9.7	14.7	14	21	21	25	9	28	9.6	10.1	104	106	0.9	1.9	97	269	138	142	4.1	6.7	1.2
0	1	1	4	15	6	5	4	0	0	0	0	0	0	0	0	0	0	0	0	0	3	32	20.7	24.1	6.9	7.9	186	196	9.4	14.7	15	17	25	25	39	47	8.9	8.9	98	98	6	7.1	90	110	138	140	4.5	4.5	0.9
1	1	1	10	5	1	2	2	0	1	0	0	0	0	0	0	0	0	1	0	1	6	78	24.2	27.7	7.2	8	61	114	9.7	17.1	14	17	19	24	61	96	7.9	9.3	102	111	3.6	5.6	63	155	141	146	4.6	6.2	1
0	0	2	4	15	6	5	4	1	0	0	0	0	0	0	0	0	0	0	0	0	2	63	28.4	33.3	9.5	11.5	154	182	11.7	16.6	13	15	21	25	16	17	7.3	7.3	96	106	0.8	0.8	189	200	132	136	3.6	4.3	3
0	1	1	2	15	6	5	4	0	2	1	0	0	1	0	0	0	0	0	0	0	2	51	35.4	35.4	13.3	13.3	119	119	8	8	13	16	22	22	23	24	6.8	7.5	99	103	1.9	1.9	134	160	133	134	3.5	3.7	1.4
0	1	1	5	3	1	1	1	3	0	0	0	0	0	0	0	0	0	0	0	0	2	47	27.8	37.1	9.5	11.6	115	157	10.4	16.4	8	8	25	25	10	12	7.7	8.3	104	112	0.7	0.8	114	114	133	141	4.3	4.5	0.8
0	1	1	3	9	6	1	2	0	0	0	0	0	0	0	0	0	0	0	0	0	2	81	38.2	38.9	12.8	13	156	169	17.9	20.7	13	14	20	22	16	22	7.1	7.5	107	109	1.4	1.4	98	227	141	144	3	5	1.6
0	1	1	4	8	5	1	2	2	0	0	0	0	0	0	0	0	0	0	0	0	10	75	26.5	33.3	8.4	11	71	112	10.8	18.2	12	12	20	20	11	11	8.2	8.2	109	111	0.8	0.8	115	115	137	139	3.7	4.2	1.3
0	0	1	4	14	6	5	3	1	0	0	0	0	0	0	0	0	0	0	0	0	6	70	27.5	37.1	9.4	12.4	193	221	8.3	8.8	10	12	23	28	15	17	7.4	8.7	106	111	0.4	0.5	90	141	140	142	3.5	3.6	0.9
0	0	4	2	14	6	4	4	0	1	0	0	0	0	0	0	0	0	0	0	0	2	93	25	25	8	8	113	113	0.3	0.3	19	19	19	19	35	35	8.3	8.3	101	101	1.4	1.4	171	171	135	135	3.7	3.7	1.3
0	0	1	4	11	6	1	4	0	0	0	0	0	1	0	0	0	0	0	0	0	10	50	27.6	31.2	9.2	10.2	210	210	9.1	13.4	10	12	26	27	9	9	8.4	8.6	92	99	0.3	0.4	278	280	130	136	4.4	4.5	0.8
0	0	1	2	7	4	1	2	1	0	1	1	0	0	0	0	0	0	0	0	0	3	48	34.6	37.6	11.6	12.9	147	168	8.8	11	11	14	23	29	8	9	6.1	7.7	99	113	0.6	0.6	77	105	139	145	3	4.2	2.9
0	0	4	4	15	6	5	4	1	0	0	0	0	0	0	0	0	0	0	0	0	2	29	18.3	30.6	6	10.1	66	168	6.8	16	7	15	19	24	3	7	6.9	8.7	104	111	0.3	0.5	95	184	134	141	3.4	4.1	1.1
0	1	1	2	11	6	2	3	0	0	0	0	0	0	0	0	0	0	0	0	0	5	61	43	43.1	14.4	14.7	200	214	12.4	12.9	11	14	19	20	13	19	8.4	8.4	105	106	1.2	1.3	103	174	136	139	4.5	6.8	2.5
1	0	4	6	3	1	1	1	0	0	1	0	1	1	0	0	0	0	0	0	0	13	69	34.7	37	11.5	12.4	186	207	10.8	16.9	12	19	16	19	17	28	6.9	6.9	89	97	0.5	1	235	296	117	126	3.5	5.6	1.4
0	0	4	2	14	6	5	3	0	0	0	0	0	0	0	0	0	0	0	0	0	7	71	36.3	39.3	11.6	12.7	129	150	6.8	9.5	12	16	25	27	27	31	8.9	9.3	103	106	1.1	1.4	90	131	140	141	3.5	4	0.3
0	0	1	6	14	6	5	3	4	0	0	0	0	0	0	0	0	0	0	0	0	2	62	23.2	29.9	7.9	10.3	64	100	6.7	9.4	12	13	23	24	13	15	8	8	107	110	0.5	0.6	101	101	139	142	3.8	4.3	1.7
0	1	3	2	15	6	5	4	1	0	0	0	0	0	0	0	0	0	0	0	0	2	62	29.3	33.6	9.5	10.8	212	272	15	24.1	11	14	27	30	8	16	7.6	8	99	107	0.5	1.1	87	200	136	141	3.7	4.3	1.7
0	1	4	7	8	3	1	4	0	0	0	0	0	0	0	0	0	0	0	0	0	17	66	19.1	26.5	6.5	9	23	64	9.6	11.7	26	34	16	21	113	172	5	6.6	97	99	5.8	8.7	77	104	140	144	4.1	4.5	1.5
0	1	1	7	3	1	1	1	1	1	0	0	0	0	0	0	0	0	0	0	0	14	46	28.1	35.4	9.7	12.6	107	196	7.5	10.5	14	19	21	29	11	23	8.4	8.8	107	109	0.8	2.3	125	132	139	148	3.9	5	3.7
0	0	1	3	13	6	4	3	0	0	0	0	0	0	0	0	0	0	0	0	0	3	67	25.6	33.2	8.1	10.6	183	239	11.4	16.5	10	10	26	26	19	19	8.1	8.1	105	107	0.6	0.6	113	113	136	139	4.3	4.4	1.5
0	0	1	3	13	6	4	3	0	0	0	0	0	0	0	0	0	0	0	0	0	3	76	24.4	27.6	8.4	9.1	108	132	8.2	12.1	8	12	25	27	9	11	8	8	109	109	0.7	0.8	96	102	143	146	3.9	4.2	1
0	1	4	8	15	6	0	3	1	0	0	0	0	0	0	0	0	0	0	0	0	2	72	35.9	39	11.9	12.8	146	152	7.9	10.3	12	12	22	24	26	33	9.6	9.1	106	107	1.3	1.4	125	125	138	138	5.1	5.1	1
1	1	4	2	15	1	0	1	0	0	0	0	0	0	0	0	0	0	0	0	0	2	72	28.5	33.7	9.2	11.1	230	314	16.7	18.4	24	26	13	15	52	68	9.3	9.8	90	93	2.7	3.8	111	118	125	127	5	5.8	1.8
0	0	2	4	15	6	5	4	1	1	0	0	0	0	0	0	0	0	0	0	0	2	69	28.7	31	9.5	10	116	153	10.1	20.1	10	23	14	23	17	23	8.5	9.6	100	105	0.7	1.5	89	136	137	138	3.2	4.1	2.1
0	1	1	3	14	5	5	4	1	1	0	0	0	0	0	0	0	0	0	0	0	3	67	23	26.5	7.9	8.8	125	183	12.7	22.5	10	14	21	22	18	19	7.9	7.8	106	110	1	1.1	160	160	136	140	3.4	4.4	4
0	0	1	2	15	6	5	4	1	0	0	0	0	0	0	0	0	0	0	0	0	3	48	27.9	33.4	9.4	11.3	137	169	4.7	6.7	12	14	20	22	41	48	6.7	7.6	103	105	2.1	3.1	133	163	134	135	3.3	3.6	1.5
0	1	1	5	13	4	5	4	0	0	0	0	0	0	0	0	0	1	0	0	0	8	54	27.9	29.9	9.5	10.1	137	150	9.7	12.4	24	27	17	18	97	100	7.3	8	91	93	6.8	7.2	110	115	131	131	4.2	4.2	1.7
0	1	4	4	9	5	1	3	0	0	0	0	0	0	0	0	0	0	0	0	1	9	72	19.4	22	7.1	7.9	63	92	11.1	15.1	18	25	14	22	51	98	7.2	8	91	95	4.5	7.8	138	189	130	135	3.5	4.8	1
0	1	1	4	14	6	5	3	1	0	0	0	0	0	0	0	0	0	0	0	0	2	59	38.7	43.9	12.1	14.1	105	128	25.9	48.5	12	18	21	26	14	23	9.3	9.4	102	104	0.8	1.1	94	132	137	140	4	4.4	3.9
0	1	1	2	14	6	4	4	0	1	0	0	0	0	0	0	0	0	0	0	0	2	76	34.8	35.2	11.6	11.8	293	337	12.5	13.8	11	14	25	25	14	15	8.1	8.3	104	105	1	1	142	158	136	139	4.3	4.5	1.1
0	0	1	6	13	6	4	3	0	0	0	0	0	0	0	0	0	0	0	0	0	4	67	25.1	33.9	8.7	11.8	60	140	9.6	13.6	12	12	23	24	14	18	7.2	8.5	114	122	0.5	0.8	89	89	146	154	2.6	3.7	1.2
0	1	4	2	13	5	4	4	0	0	0	0	0	0	0	0	0	0	0	0	0	2	62	32	33.5	10.5	11.2	647	690	11.4	11.9	14	14	21	22	16	20	8.5	8.9	106	107	0.5	0.5	96	105	138	138	4.1	4.1	0.9
0	0	1	4	13	6	4	3	1	0	0	0	0	0	0	0	0	0	0	0	0	3	60	26	29.3	8.5	9.5	217	246	6	10.7	13	21	22	28	16	59	8.7	8.9	94	97	3.9	7	79	88	131	135	3.7	4.6	0.6
0	0	1	4	3	1	1	1	0	0	0	0	0	0	0	0	0	0	0	0	0	7	77	21	26.4	7.9	9.6	163	188	8.5	10.4	8	12	23	25	10	15	8	8	104	109	0.9	1	128	171	136	141	3.3	3.6	0.7
0	0	4	4	7	4	1	2	0	1	0	1	0	1	0	0	0	0	0	0	0	9	30	33.5	39.3	11.8	13.3	89	162	8.6	17.6	16	19	17	22	19	24	7.7	10.2	100	103	1.4	1.6	101	135	137	142	4	5.7	1.4
0	0	1	2	14	6	5	3	3	0	0	0	0	0	0	0	0	0	0	0	0	5	87	26.2	37.7	8.9	13	107	221	10.3	11.2	11	11	20	22	20	23	8.3	8.3	109	110	0.9	1.1	81	81	138	138	4.4	5	0.6
0	0	1	4	14	6	5	3	0	0	0	0	0	0	0	0	0	0	0	0	0	6	73	33.7	39.3	10.5	12.6	116	227	16.7	26.3	12	14	20	21	13	14	6.6	7	98	102	0.5	0.6	75	153	128	132	4	4.3	1.2
0	1	4	2	15	4	0	2	0	1	0	0	0	0	0	0	0	0	0	0	0	2	40	33.8	34.8	11.3	12.1	168	200	13.2	17.1	13	16	21	23	20	21	8.5	8.6	101	107	1.3	1.6	132	137	134	139	3.6	4.8	1.3
0	0	1	3	13	6	4	3	0	0	0	0	0	0	0	0	0	0	0	0	0	5	81	49.1	53.6	16.1	16.5	143	184	8.1	9	13	17	32	37	17	25	8.2	9	95	98	0.7	0.8	113	133	140	143	3.2	5.6	1
0	1	1	2	13	5	4	4	0	0	0	0	0	0	0	0	0	0	0	0	0	4	61	34.2	36.3	11.6	12	138	153	0.8	7.3	8	9	26	28	18	19	7.5	7.7	102	105	0.7	0.9	107	168	134	136	3.6	4	1.4
0	1	1	2	14	6	5	3	0	0	0	0	0	0	0	0	0	0	0	0	0	6	70	33.4	33.4	10.7	10.7	208	208	14.6	14.6	14	14	25	25	54	54	8	8	106	106	1.2	1.2	100	100	141	141	3.9	3.9	1.5
0	0	1	7	6	4	1	1	0	0	0	0	0	0	0	0	0	0	0	0	0	8	84	26.9	37.4	9.5	12.8	77	154	9.8	13.8	19	28	13	23	40	47	7.5	9.3	82	89	1.5	1.9	97	207	117	125	3.7	5.1	3.4
0	1	1	6	3	1	1	1	0	0	0	0	0	0	0	0	0	0	0	0	0	17	46	42.9	45.7	16	16.7	129	160	10.2	12.1	12	18	19	23	19	23	8	9.1	102	107	0.4	1.3	115	129	136	140	3.2	4.4	1.2
0	1	1	4	8	5	1	2	1	0	0	0	0	0	0	0	0	0	0	0	0	17	74	22.9	31.2	7.5	10.1	115	182	9.6	13	10	11	21	22	5	7	7.2	8.8	109	116	0.4	0.5	110	111	137	145	3.3	4.5	1.2
1	1	1	5	10	6	1	3	0	1	0	0	0	0	0	0	0	0	0	0	0	24	53	34.4	34.8	11.8	12.2	118	130	21.8	22.3	19	20	19	21	69	73	7.8	8	94	95	4	4.3	42	73	129	132	3.1	3.4	1.6
0	0	1	2	8	5	1	2	0	1	0	0	0	1	0	0	0	0	0	0	0	6	55	34.1	44.3	12	14.7	238	338	8.5	13.7	9	23	17	21	8	14	6.8	10	98	117	0.9	1.8	104	176	138	148	2.5	4.4	1.2
0	1	1	2	15	6	5	4	0	1	0	0	0	0	0	0	0	0	0	0	0	2	64	21.5	37	7.2	12.6	100	193	9.3	15.1	12	13	23	24	13	15	8.1	9.1	110	110	0.6	0.6	110	110	142	142	3.9	4.2	1.7
0	0	4	3	9	5	1	3	0	1	0	0	0	0	0	0	0	0	0	0	0	2	55	35.8	38.2	12.3	13.1	230	240	8.8	13.9	14	15	22	23	10	12	7.6	7.8	110	112	0.6	0.6	147	224	142	146	3.5	3.6	1.6
0	1	1	6	4	2	1	1	0	0	0	0	0	0	0	0	0	0	0	0	0	6	47	29.4	29.7	10.2	10.2	32	50	10.7	18.9	11	18	14	20	77	79	8.7	8.8	111	114	2.1	2.1	144	206	142	146	4	5.1	1.9
0	1	1	2	14	6	4	4	0	0	0	0	0	0	0	0	0	0	0	0	0	2	73	29.8	33.5	10.1	11.3	170	196	10.6	11.3	10	15	22	25	18	20	7.8	8.2	103	104	0.9	1	127	170	135	135	4.4	4.5	1
0	0	2	5	9	5	1	3	0	1	0	0	0	0	0	0	0	0	0	0	0	6	52	32.5	36.9	10.5	11.7	106	134	10.3	11.8	27	34	12	17	29	53	7.8	8.3	94	100	2.2	4.7	113	121	139	143	4.3	6.1	1.4
1	0	1	4	3	1	1	1	1	1	0	0	0	1	0	0	0	0	0	0	0	3	62	28.5	31.2	8.8	9.7	177	282	5.5	20.7	18	23	25	29	50	68	8.2	9.9	97	99	7.5	8	159	311	141	144	3.2	5.2	2.2
1	0	1	4	15	6	5	4	1	0	0	0	0	0	0	0	0	0	0	0	0	3	65	32.3	32.3	10	10	130	130	5.2	5.2	6	7	32	33	11	14	7	7.5	93	97	0.5	0.6	108	148	129	133	2.9	3.2	1.4
0	1	1	3	14	6	4	4	0	0	0	0	0	0	0	0	0	0	0	0	0	3	81	31.3	35.3	10.7	12.1	169	212	8.7	9.4	13	16	14	16	22	27	9	9.1	115	116	1.7	2.2	149	206	139	142	4.2	4.8	1.2
0	0	4	2	8	5	1	2	0	0	0	0	0	0	0	0	0	0	0	0	0	28	85	29.8	30.3	9.7	9.8	137	156	10.1	10.6	13	15	20	21	39	43	7.6	7.9	110	111	1.4	1.6	174	187	140	142	4.2	4.4	1.5
0	1	2	2	15	6	5	4	0	0	0	0	0	0	0	0	0	0	0	0	0	2	24	28.1	40.1	8.7	12.9	177	275	4.1	11.1	15	18	23	26	11	12	9.3	9.4	102	103	1	1.1	124	130	138	140	3.7	4.2	1.2
0	0	1	4	6	4	1	1	1	1	0	0	0	0	0	0	0	0	0	0	0	6	77	47.9	47.9	15.1	15.1	221	221	11	11	13	19	21	23	52	76	8.7	9.3	112	115	1.7	3	113	166	149	152	3.4	3.7	1.5
0	0	4	3	14	6	5	3	1	0	0	0	0	0	0	0	0	0	0	0	0	2	75	37.2	41.9	11.5	13.4	293	317	15.5	18.9	11	20	22	25	13	18	8.1	8.1	98	107	0.7	0.8	104	194	136	140	3.4	3.6	1.2
0	0	1	6	15	6	5	4	1	0	0	0	0	0	0	0	0	0	0	0	0	2	80	22.6	32.7	6.9	10.4	111	271	11.8	22.7	9	18	16	18	16	24	8	8	104	118	0.9	1	62	108	139	140	3.8	4.2	0.9
0	1	1	3	12	5	4	3	0	0	0	0	0	0	0	0	0	0	0	0	0	9	53	20.6	29.5	7.5	10.3	131	216	4.5	9.5	9	15	21	25	14	28	7.7	9	82	92	0.4	0.6	130	170	117	125	3.9	4.7	1.5
0	0	1	6	9	6	2	1	1	1	0	0	0	0	0	0	0	0	0	0	0	3	42	27	32	9	10.6	225	294	12	15.2	12	17	25	30	12	14	6.9	7.9	97	103	1	1.1	96	124	132	141	3.5	4	1.2
0	1	1	2	10	6	1	3	1	0	0	0	0	1	0	0	0	0	0	0	0	5	65	32.5	33	10	10.2	163	168	7.9	12.6	10	10	30	30	65	71	9.8	9.8	105	106	2.7	2.7	97	97	142	142	3.9	4	1
1	1	1	11	3	1	1	1	0	0	0	0	0	0	0	0	0	0	0	0	0	5	52	28.9	32.8	9.9	11	283	358	10.6	10.8	16	26	17	23	47	52	8.2	8.4	85	92	1.8	2.3	260	335	125	127	3.8	4.5	1.1
0	0	4	5	12	4	4	4	1	0	0	0	0	0	0	0	0	0	0	0	0	8	74	31.2	37.1	10	11.6	207	286	15.1	25.7	12	17	23	25	18	22	8	8	102	104	0.7	0.9	116	202	135	139	4	4.5	1.8
0	1	2	7	11	5	2	4	3	0	0	0	0	1	0	0	0	0	0	0	0	5	85	20.6	31.9	6.5	10.8	71	149	7.5	11.6	19	31	9	19	49	55	7.4	8.8	100	108	4.5	6.3	128	164	134	142	4.8	5.9	1.4
0	0	4	2	14	6	4	4	0	0	0	0	0	0	0	0	0	0	0	0	0	6	68	27.8	29.3	8.6	9	213	217	5.5	6	13	14	20	21	39	43	7.4	7.4	109	110	0.6	1.2	115	116	138	139	5.1	5.1	1.5
1	1	4	2	15	5	0	1	0	1	0	0	0	0	0	0	0	0	0	0	0	5	78	38.1	41.7	12	13.3	94	124	13.1	18.3	13	16	20	23	32	35	8.6	9.2	104	109	1.4	1.5	199	244	141	144	4.3	4.8	1.8
1	0	4	3	9	4	2	3	0	1	0	0	0	0	0	0	0	0	0	0	0	2	49	27.2	28.3	9.8	10.2	102	113	11.9	14.1	22	27	17	20	77	85	8.2	8.8	93	100	0.7	1.4	202	296	130	139	2.9	4.8	2.5
0	0	1	9	3	1	1	1	0	0	0	0	0	0	0	0	0	0	0	0	1	10	46	23.3	29.6	8	10.5	88	254	16.5	24.2	12	29	17	22	25	40	5	8.3	86	103	2.7	4.7	92	234	127	133	3	3.4	5.3
0	0	4	2	14	6	5	3	0	0	0	0	0	0	0	0	0	0	0	0	0	2	88	28.2	31.3	9	10	270	282	6.3	6.5	11	14	23	26	9	9	8.9	9	103	104	1	1	128	132	136	137	4	4.1	0.8
0	1	1	2	11	6	1	4	0	3	1	0	0	1	1	0	0	0	0	0	0	4	51	25.5	34.9	8.3	12	1039	1418	6.2	29.8	13	16	18	20	19	21	7.7	8.5	104	107	1	1.1	85	121	134	136	3.8	4.5	2.4
0	0	4	6	14	6	5	3	2	0	0	0	0	0	0	0	0	0	0	0	0	2	85	23.4	29.3	7.5	9.5	137	182	10.3	18.9	10	10	25	25	17	18	8.6	8.6	105	107	0.8	1	68	68	140	140	4.2	4.5	2.4
0	1	1	14	3	1	1	1	0	1	0	0	0	1	0	0	0	0	0	0	1	4	48	37.9	38.1	13.6	13.8	209	235	22.9	29	17	21	15	18	49	62	8.5	9.5	95	106	2.4	3.6	284	625	126	135	4.2	5.8	1.4
0	0	1	6	14	6	5	3	0	0	0	0	0	0	0	0	0	0	0	0	0	2	66	33.2	36.8	11.3	12.7	111	133	9.7	14.7	11	15	22	22	12	12	7	7.9	102	105	0.5	0.6	97	113	134	135	3.4	4.5	1.2
1	1	1	2	14	6	5	3	0	0	0	0	0	0	0	0	0	0	0	0	0	2	78	27.9	31.7	10.4	11.4	376	480	1.4	2.3	12	17	24	29	11	12	8.7	8.8	90	94	0.6	0.6	127	157	127	132	4	4.3	3.3
0	0	1	2	12	6	2	4	0	1	0	0	0	0	0	0	0	0	0	0	0	6	53	21.3	32.4	7.2	10.6	216	387	8.6	16.3	10	17	21	26	28	36	7.8	8.3	108	110	1.1	1.2	117	170	142	143	3	3.4	1.8
0	1	4	5	15	6	5	4	1	1	0	1	0	0	0	0	0	0	0	0	0	5	77	35.8	39.5	11.6	12.1	136	163	8.3	8.7	16	25	16	24	23	31	8.5	8.9	100	101	1.2	1.8	140	268	136	139	3.2	3.6	2.4
0	1	3	4	14	6	5	3	0	0	0	0	0	0	0	0	0	0	0	0	0	3	31	24.5	32.8	8.4	11.2	103	158	9	12.1	11	13	23	23	9	9	7.9	7.9	107	114	0.6	0.9	118	118	139	144	4.3	4.3	2.3
1	1	4	4	10	5	1	4	1	1	0	0	0	1	0	0	0	0	0	0	0	5	74	40.1	41.5	12.4	12.5	257	281	4.7	7.8	6	13	31	33	12	12	7.8	8.5	100	104	0.9	1	90	111	135	142	4.1	5.6	0.9
0	0	1	3	11	6	1	4	0	0	0	0	0	0	0	0	0	0	0	0	0	25	48	38.5	41	13.4	14.4	111	129	11.4	12.4	12	21	20	23	16	16	7.7	7.9	112	114	0.9	1.1	157	233	145	149	3.5	4.1	1.1
0	1	1	2	14	6	4	4	1	0	0	0	0	0	0	0	0	0	0	0	0	4	73	22.3	32	7.5	10.9	208	341	14.6	18.2	13	17	22	26	21	22	9.2	9.2	97	103	0.9	1.1	85	95	132	136	4.4	5	1.4
0	0	4	9	3	1	1	1	0	0	0	0	0	0	0	0	0	0	0	0	0	3	80	27.3	34.3	9.1	12	117	291	10	17.5	11	15	20	21	24	35	7.8	7.8	106	112	1.2	1.4	94	167	137	138	4.2	4.9	1.1
0	1	1	8	14	6	5	3	1	0	0	0	0	0	0	0	0	0	0	0	0	3	63	28.3	39.5	9.2	12.7	141	186	3.2	14	12	13	22	23	9	10	8.2	8.2	107	110	1.2	1.3	107	107	138	141	4.2	5	1
0	0	1	6	11	6	1	4	0	0	0	0	0	0	0	0	0	0	0	0	0	18	85	32.7	39.4	12.4	13.7	212	224	10.1	22.6	9	17	21	29	12	18	8.6	9.6	99	104	0.7	0.8	127	273	134	137	3.8	4.4	1.8
1	1	1	4	13	5	4	4	0	0	0	0	0	0	0	0	0	0	0	0	0	3	59	52.1	55.5	17.9	19.1	180	203	12.6	13.6	15	22	31	33	86	101	9.8	10.1	79	85	1.4	2.2	156	220	127	130	3.3	4.5	1.8
0	0	2	3	14	6	4	4	1	0	1	0	0	0	1	0	0	0	0	0	0	2	77	24.4	29.9	8	9.4	275	308	12.5	15.5	11	11	23	23	23	24	7.4	7.4	108	109	1.3	1.5	127	141	138	139	3.5	4.1	1
0	1	1	4	13	6	4	3	0	0	0	1	0	0	0	0	0	0	0	0	1	6	74	34.7	39.4	10.5	11.7	238	323	7.6	9	25	33	14	21	64	101	8.7	9	92	97	3.3	4.9	89	196	139	142	4.6	5.9	4.1
0	1	1	2	14	6	5	3	2	0	0	0	0	0	0	0	0	0	0	0	0	4	74	26.3	39.2	8.7	13.1	117	142	11	14.7	10	11	22	23	12	13	8.4	7.8	109	111	0.7	0.9	89	89	138	140	4.2	5.1	1.1
0	1	1	3	10	6	1	3	0	0	0	0	0	0	0	0	0	0	0	0	0	22	66	44.9	48.6	15	16.1	161	178	13.1	18.9	14	14	19	20	23	25	8.2	8.6	104	105	1.1	1.1	171	192	138	138	4.4	4.6	0.9
0	1	1	6	4	1	2	1	0	0	0	0	0	0	0	0	0	0	0	0	0	5	60	26.1	41.7	9	14.9	112	133	6.8	10.3	11	14	22	26	19	27	8	8	104	114	0.9	1.6	141	145	140	143	4.1	5.4	1.5
0	1	1	9	14	6	4	4	0	1	0	0	0	1	0	0	0	0	0	0	0	3	71	19.6	22.7	6.8	7.7	70	88	6.6	15	14	16	16	19	11	14	6.9	7.2	95	97	1.1	1.2	102	120	124	126	3.2	3.8	3
0	0	1	4	15	6	5	4	0	1	1	0	0	1	0	0	0	0	0	0	0	2	60	37.5	38.8	12.5	13	83	112	4.4	19.5	13	13	18	19	21	21	7.3	7.6	114	115	1	1	102	152	142	143	3.4	4.1	0.7
0	0	1	4	3	1	1	1	0	0	0	0	0	1	1	0	0	0	0	0	0	5	33	32.6	32.8	10.9	10.9	238	250	18.8	19	12	13	24	24	10	11	8.1	8.2	99	101	0.6	0.6	165	247	135	138	3.8	4.4	1.1
0	1	4	6	15	6	5	4	1	0	0	0	0	0	0	0	0	0	0	0	0	2	51	28.2	34.2	9	10.3	137	177	10.9	17.3	13	24	13	20	11	21	7.4	8.2	103	106	1.2	2.5	101	166	133	135	4	5.5	0.8
0	1	4	2	13	6	4	3	0	1	0	0	0	0	0	0	0	0	0	0	0	2	83	24.4	26.7	7.8	8.9	248	254	6	9.2	14	15	21	21	20	24	7.5	7.8	102	102	0.7	0.7	162	165	137	138	4.2	4.7	1.1
1	0	1	2	13	6	4	3	0	0	1	0	0	0	0	0	0	0	0	0	0	5	44	23.6	35	8.6	10.8	199	253	9.8	9.9	9	12	22	22	17	25	7.6	7.7	106	108	0.7	1.5	104	152	132	138	3.8	5.1	3.4
0	1	1	9	10	5	2	3	1	0	1	0	0	0	0	0	0	0	0	0	0	8	27	45.8	47.4	15.5	17.1	278	320	22.5	25.4	13	30	16	24	27	41	6	7.4	99	104	2.8	4.5	101	250	134	138	4.2	9.6	1.6
0	0	1	4	15	6	5	4	1	0	0	0	0	0	0	0	0	0	0	0	0	3	60	22.1	28.8	7.2	9.7	136	159	7.8	12.5	13	13	22	23	9	10	8.9	8.9	105	108	0.6	0.6	114	114	137	138	4.4	4.6	3.2
1	1	4	3	12	5	4	3	0	0	0	0	0	0	0	0	0	0	0	0	0	5	49	20.3	26.6	7.3	9.9	66	142	14.2	18	24	27	16	18	45	53	7.6	8.5	88	92	3	4.5	96	141	127	130	3.3	3.6	1.57
0	1	1	5	15	1	0	1	1	0	0	0	0	0	0	0	0	0	0	0	0	4	80	25.1	33.2	8.8	9.6	77	103	12.1	18.8	10	14	24	25	17	19	8.4	8.4	107	112	1.1	1.4	122	122	139	143	4.1	4.9	0.8
1	1	4	7	3	1	1	1	0	0	0	0	0	0	0	0	0	0	0	0	0	3	22	41.8	48.3	13.6	15.9	158	349	19.5	35.2	18	23	15	21	14	30	7.7	8.4	99	105	1.6	3.3	106	234	138	140	3.3	4.3	5.3
0	1	1	2	12	6	4	2	0	0	0	0	0	0	0	0	0	0	0	0	0	2	53	29.7	30.9	10.1	10.4	369	391	17.4	19.5	13	17	23	24	11	12	8.9	9.2	101	107	0.6	0.7	117	144	136	140	4.2	4.8	1.4
0	0	1	4	7	5	1	1	2	0	0	0	0	0	0	0	0	0	0	0	0	22	77	29.5	33.5	9.3	10.8	217	240	7.7	9.7	15	22	20	23	38	44	8.2	9.1	100	104	1.2	1.4	101	103	137	138	3.8	4.7	0.8
0	1	1	11	15	6	0	4	0	0	0	0	0	0	0	0	0	0	0	0	0	4	68	26.2	29.6	9.7	9.8	55	83	7.4	9.8	15	16	19	22	27	32	6.7	7.4	109	112	5.1	5.7	111	111	140	141	4.7	5.2	0.8
0	0	1	3	10	6	1	3	2	1	0	0	0	2	1	0	0	0	0	0	0	3	81	28.9	39.1	9.4	12.9	251	402	13.2	22.1	13	18	18	19	38	43	7.6	8.5	101	109	1.7	2.1	129	188	134	137	3.8	4.3	1.2
0	0	1	3	14	6	4	4	0	1	0	0	0	0	0	0	0	1	0	0	0	2	32	25.6	25.8	8.4	8.5	256	266	7.6	8.4	10	13	28	30	20	21	8.7	8.9	108	110	1	1.2	88	92	145	146	3.6	3.9	0.6
0	0	4	3	14	6	4	4	1	0	0	0	0	0	0	0	0	0	0	0	0	4	46	24.3	32.9	7.9	11	186	200	10.1	15	8	10	24	25	13	15	9.1	9.1	113	114	1	1	76	76	142	144	4.1	4.2	0.4
0	0	1	4	15	6	5	4	3	2	0	0	0	0	0	0	0	0	0	0	0	2	64	15.8	36.9	4.9	12.4	121	559	5.4	19.1	9	17	16	23	13	18	7.5	9	98	108	0.9	1.2	101	209	134	141	4.6	5.2	0.9
0	1	1	2	4	2	1	1	0	0	0	0	0	0	0	0	0	0	0	0	0	13	67	33	50.9	12.4	16.8	216	238	11.3	21.2	12	12	26	26	23	24	8.8	8.8	102	102	1	1	137	137	135	135	4.1	5.3	1.3
0	0	1	2	15	6	5	4	0	0	0	0	0	0	0	0	0	0	0	0	0	2	68	33.9	40.8	11.5	13.9	82	118	8.7	11.2	11	14	19	22	11	13	7.4	7.4	107	109	0.7	0.7	104	106	140	142	3.4	3.9	1.5
0	0	4	2	14	6	5	3	1	0	0	0	0	0	0	0	0	0	0	0	0	2	78	20.7	31.5	7	10.5	195	362	11.5	21.3	10	15	22	26	17	27	9.1	9.8	96	104	0.6	0.9	107	160	133	137	4.1	4.4	2.2
0	1	1	4	15	6	5	4	0	1	0	0	0	1	1	0	0	0	1	0	0	3	19	28.4	31.3	9.8	10.9	119	157	36.8	43.6	13	20	12	19	12	15	6.9	8	97	100	0.9	1.1	122	266	128	132	3.6	4.3	3.5
1	1	1	2	14	6	4	4	0	0	0	0	0	0	0	0	0	0	0	0	0	5	64	26.8	34.2	8.4	11.2	347	615	11.8	19.9	12	13	29	34	14	17	8.4	9	96	103	0.4	0.6	89	126	136	141	4	5.6	0.8
0	0	1	2	14	6	4	4	0	1	0	0	0	1	0	0	0	0	0	0	0	2	88	23.2	29.2	6.7	8.4	105	135	86.1	127.5	11	16	21	25	35	46	7.9	8.9	106	111	1.3	1.6	85	102	141	143	3.7	4.6	0.6
0	0	1	6	13	5	4	4	2	1	0	0	0	0	0	0	0	0	0	0	0	2	80	34.3	35.9	11	11.4	211	231	19.6	20	12	15	23	26	14	16	8.6	9.1	98	101	0.9	1	129	160	136	139	3.1	4.1	1.2
0	1	4	6	3	1	1	1	3	0	0	0	0	0	0	0	0	0	0	0	0	2	69	25.3	29.5	8.8	10.2	102	166	5.2	9.3	7	11	23	23	14	15	8.1	8.1	108	114	1	1.3	98	98	137	140	4.2	4.6	0.8
1	0	1	5	6	4	1	1	0	0	0	0	0	0	1	0	0	0	0	0	0	3	52	22.5	27.2	7.6	9.2	45	60	5.4	7.4	13	14	23	26	15	16	8.3	8.8	97	98	1	1.4	108	134	131	134	3	3.8	1.6
0	1	1	7	15	6	0	4	0	0	0	0	0	0	0	0	0	0	0	0	0	5	68	25.3	32.8	8.9	11.4	173	252	10.8	21.8	15	16	19	22	20	22	7.9	8.1	105	109	1.2	1.4	164	224	135	142	3.5	5	1.8
0	1	1	2	15	6	5	4	0	0	0	0	0	0	0	0	0	0	0	0	0	3	78	43.4	43.8	14.4	14.8	211	220	13	15.8	15	17	29	29	16	17	8.5	8.9	93	96	1	1.1	142	235	134	136	4.1	4.5	2.6
1	0	4	4	6	3	1	2	0	1	1	0	0	0	0	0	0	0	0	0	0	12	76	24.9	32.4	8.1	10.3	174	268	27.2	42.6	18	20	17	19	31	37	7.5	8.8	101	105	0.7	0.8	92	157	135	136	4.1	4.3	1.7
0	1	4	4	14	6	4	4	1	0	0	0	0	1	0	0	0	0	0	0	0	2	64	25.1	27.5	8.1	8.7	310	369	30.8	37.9	12	15	17	18	15	17	7	7.3	111	113	1.1	1.2	122	150	139	140	3	3.8	0.8
0	1	4	4	7	5	1	1	0	0	0	0	0	0	0	0	0	0	0	0	0	6	78	30.5	33.5	9.6	10.8	84	88	6.9	7.4	16	18	22	23	14	14	8	8.6	100	103	1.4	1.4	102	111	137	137	3.6	4	1.1
0	0	1	6	9	5	2	2	0	0	0	0	0	0	0	0	0	0	0	0	0	14	55	24.4	24.6	7.8	8.4	258	294	9.3	10.2	18	22	22	25	25	30	8	8.6	93	103	3.7	5.3	104	146	138	143	3.6	4.5	1.2
0	1	2	2	14	6	5	3	0	1	0	0	0	0	0	0	0	0	0	0	0	3	35	30.6	31.8	9.6	9.7	239	242	10.5	12	12	12	24	24	13	13	8.4	8.4	104	104	1	1	163	163	140	140	3.6	3.6	1.4
0	1	1	2	14	6	5	3	0	0	0	0	0	0	0	0	0	0	0	0	0	2	18	42.9	43.2	14.7	15.2	187	221	10.3	14.3	13	13	28	28	8	16	9.3	9.3	113	113	0.9	0.9	103	103	150	150	4.2	4.2	1.7
0	1	4	2	15	6	5	4	0	0	0	0	0	0	0	0	0	1	0	0	0	4	81	27.7	30.5	8.6	9.7	93	109	6.1	8.7	11	13	20	21	52	61	8.3	8.4	111	112	1.4	1.7	164	173	138	141	4.3	4.5	1.3
0	1	4	5	15	6	5	4	0	0	0	0	0	0	0	0	0	0	0	0	0	6	56	44.7	47.1	15.4	15.8	144	213	14.9	19.3	19	23	28	30	68	84	8.9	9.5	80	83	1.6	2.1	217	369	123	126	4.6	5.8	1.7
0	0	3	3	8	5	1	1	2	1	0	0	0	0	1	0	0	0	0	0	0	3	61	24.5	29.5	9.1	9.8	159	174	15	21.4	12	13	20	25	14	22	7.7	8	110	111	0.6	0.7	134	245	140	144	3.4	4	1.1
0	1	1	2	10	6	1	3	0	0	0	0	0	0	0	0	0	0	0	0	0	2	57	33.1	36.2	10.4	11.4	196	236	8.8	10.4	8	9	32	34	20	28	8.3	8.4	105	106	0.9	1.1	170	181	142	144	4.1	5.2	1
0	1	1	5	13	6	4	3	0	0	0	0	0	1	0	0	0	1	0	0	0	6	76	32.1	32.6	10.2	10.2	372	441	20.6	26.2	11	13	34	36	69	74	8.6	8.7	99	103	1.1	1.2	253	282	146	150	3.8	4.5	1.5
0	1	1	3	14	6	4	4	0	0	0	0	0	0	0	0	0	0	0	0	0	2	79	29.4	31.1	9.2	9.8	145	169	5	6.9	16	19	21	25	64	67	7.9	8.1	92	96	2.6	3.2	41	133	127	132	5	5.9	1.4
0	0	1	3	13	5	4	4	1	0	0	0	0	0	0	0	0	0	0	0	0	9	73	29	30.8	9.5	10.3	314	361	10.8	11.6	15	16	23	24	27	28	8.2	8.2	103	103	1.2	1.4	190	217	142	142	4.1	4.1	0.8
0	0	1	6	14	6	4	4	0	0	0	0	0	0	0	0	0	0	0	0	0	3	78	23.3	31.4	8.1	11.4	91	138	9.1	15.2	13	14	22	23	13	15	8.4	8.8	106	111	0.6	0.8	126	126	139	143	3.2	3.9	2.5
0	0	1	5	14	6	5	3	0	0	0	0	0	0	0	0	0	0	0	0	0	2	72	28	31.1	9.9	10.1	216	236	11.3	18.8	13	13	23	24	25	34	8	8.2	109	111	1	1	149	149	139	139	4.1	5.6	1.4
0	1	1	10	3	1	1	1	0	0	0	0	0	0	0	0	0	0	0	0	0	4	66	24.3	29.2	8.3	9.5	83	153	10.1	17.8	11	16	19	22	15	16	8.5	8.3	108	110	1.1	1.1	122	122	137	140	4.2	4.6	2.5
0	1	2	2	10	6	1	3	0	0	0	0	0	0	0	0	0	0	0	0	0	7	53	38.9	40.4	12.9	13.3	196	212	6.7	7.6	11	13	30	32	13	21	8.4	8.5	96	97	1.1	1.3	102	139	134	135	4.2	4.8	1.5
1	1	2	7	13	6	4	3	0	1	0	0	0	0	0	0	0	0	0	0	0	3	68	34	40.6	11.5	13.9	43	63	4.6	5	12	19	16	18	84	88	7.3	8.3	99	105	3.5	4.2	123	188	133	136	5	6.2	2.6
0	0	1	4	15	6	0	4	0	0	0	0	0	0	0	0	0	0	0	0	0	3	61	33.5	37.5	11.2	12.2	280	329	29.5	43.8	13	19	21	23	14	17	8.3	8.4	100	106	0.5	0.7	127	338	136	140	2.9	3.6	1.9
0	0	1	2	8	3	2	3	0	0	0	0	0	0	0	0	0	0	0	0	0	9	73	32.2	32.2	10.1	10.1	141	141	10.1	10.1	12	13	20	20	16	18	8	8	108	109	1	1	211	242	135	141	3.9	4	1.3
0	1	1	2	7	5	1	1	0	0	0	0	0	0	0	0	0	0	0	0	0	17	69	30.9	37.9	11.9	13.6	146	177	6.6	8.4	12	16	24	29	12	16	8.1	8.4	105	106	0.9	0.9	113	127	140	142	3.5	4.2	1.6
0	1	4	2	3	1	1	1	0	0	0	0	0	0	0	0	0	0	0	0	0	5	52	39.3	44	13.7	15.1	251	301	15.4	19.5	15	21	15	19	20	23	7	8.2	103	113	0.7	1.6	128	229	134	140	3.7	5.2	1.6
0	1	1	2	15	1	0	1	0	1	0	0	0	0	0	0	0	0	0	0	0	4	25	39.5	48.6	13.1	15.9	167	287	14.5	31.3	11	20	17	27	30	34	5.7	7.3	101	109	2.5	3.8	91	405	134	140	4	7	1.6
0	1	4	4	8	3	1	4	0	0	0	0	0	0	0	0	0	0	0	0	0	99	65	37.8	43.6	12.9	13.2	191	229	17.2	20.9	15	22	16	19	18	20	7.8	7.9	109	116	1.1	1.3	125	138	143	146	3.7	4.1	1.4
1	0	1	2	8	5	1	2	0	0	0	0	0	0	0	0	0	0	0	0	0	9	51	29.5	29.5	9.2	9.2	109	109	7.4	7.4	11	11	31	31	19	19	8.4	8.4	100	100	0.4	0.4	157	157	138	138	3.7	3.7	1.1
0	1	2	9	8	5	1	2	0	0	0	0	0	0	0	0	0	0	0	0	0	11	64	23	31.9	7.7	10.5	100	136	3.5	7.3	24	31	18	23	14	16	7.3	9.1	100	108	1.2	2.3	181	209	143	149	3.5	5.1	12.2
0	1	4	3	4	1	1	2	0	0	0	0	0	0	0	0	0	0	0	0	0	14	90	27.5	36.7	8.8	11.5	259	279	7.4	15.7	10	16	30	33	79	82	8.3	9.2	88	95	2.2	2.3	196	265	128	133	4.6	6.4	0.9
0	0	4	6	3	1	1	1	1	1	0	0	0	0	0	0	0	0	0	0	0	2	66	22.5	31.1	8	11.1	119	143	7.6	11.9	8	8	22	24	11	12	5.9	7.3	113	114	0.6	0.7	106	112	139	140	3.7	4.4	0.9
0	1	1	2	11	6	1	4	0	0	0	0	0	0	0	0	0	0	0	0	0	5	39	28.7	34.7	10	11.9	102	125	4.1	5.4	16	17	21	24	7	14	7.1	7.4	105	109	0.5	0.6	90	118	140	143	3.5	3.8	2.7
1	1	2	3	7	4	2	1	0	3	0	1	0	0	0	0	0	0	0	0	0	5	85	19.3	28.9	5.4	8.7	148	260	7.5	12.6	27	30	8	15	105	214	8.1	8.6	137	140	5.8	12.8	86	213	165	179	3.5	5.4	2.9
0	1	1	2	14	6	5	3	0	1	0	0	0	0	0	0	0	0	0	0	0	2	34	29.2	31.7	9	9.8	296	377	12.3	13.4	17	19	20	21	15	23	7.2	7.4	101	102	1.2	1.9	108	117	135	136	4.8	5.3	2.4
0	1	1	3	15	6	0	4	1	0	0	0	0	0	0	0	0	0	0	0	0	2	68	30.1	31.4	10.6	10.6	123	129	11.3	12.5	11	12	24	24	16	18	8.6	8.6	102	104	0.9	1	114	114	133	135	3.8	4.8	1.4
0	0	4	6	10	6	1	3	0	2	1	0	0	0	0	0	0	0	0	0	1	9	52	33.1	39.7	10.5	12	165	262	17.8	31.4	18	48	5	18	8	40	6.8	9.5	96	104	1.2	3.1	69	367	133	147	3.7	6.1	5.3
1	0	4	3	8	1	1	1	0	1	0	0	0	0	0	0	0	0	0	0	0	2	54	22.2	36.7	6.8	11.1	36	128	11.6	17.4	19	36	9	16	13	16	7.6	8.9	100	107	1.1	2.3	61	177	139	146	3.6	5.3	3.2
0	1	1	9	14	6	4	4	1	0	0	0	0	0	0	0	0	0	0	0	0	2	33	43.4	54.2	14.2	17.7	177	249	13.6	26.2	10	34	16	22	21	31	6.9	7.9	101	116	1.7	2.3	87	141	143	146	3.3	4.8	1.1
0	0	2	2	14	6	4	4	0	1	0	0	0	0	0	0	0	0	0	0	0	4	72	19.7	31.4	5	9.2	541	652	10.1	24.9	17	21	23	28	19	26	5.2	8.2	96	105	1.4	1.7	92	168	139	143	2.9	6.1	1.8
0	1	4	2	10	5	1	4	0	1	1	0	0	0	0	0	0	0	0	0	0	12	79	32.4	32.4	10.4	10.4	456	456	11.8	11.8	9	9	32	32	32	32	8.8	8.8	109	109	0.7	0.7	52	80	146	146	3	4.3	1.1
1	1	1	6	11	6	2	3	1	0	0	0	0	0	0	0	0	0	0	0	0	6	85	28.4	33.8	8.8	10.5	77	131	8.2	11.5	12	14	20	24	56	65	8.8	9.6	106	108	2.2	2.3	76	115	141	146	3.5	4.9	1.7
0	0	1	4	15	6	5	4	1	0	0	0	0	1	0	0	0	0	0	0	0	2	51	31.9	39.3	10.4	12.4	163	244	13.3	22.7	11	15	19	21	26	35	6.1	8.4	109	116	1	1.5	87	181	140	142	2.5	5.1	0.9
0	0	1	3	15	6	5	4	0	0	0	0	0	0	0	0	0	0	0	0	0	4	83	31.9	31.9	10.1	10.1	275	275	13.6	13.6	11	11	31	31	42	42	8.6	8.6	97	97	2	2	82	82	134	134	4.5	4.5	2.1
0	0	2	2	14	6	5	3	1	1	0	0	0	0	0	0	0	0	0	0	0	2	52	22.2	31.2	7	10.4	241	344	17.2	28.3	11	13	22	25	5	5	7.6	8.4	97	101	0.6	0.7	139	159	133	137	4	4.2	3.2
0	1	1	3	14	6	4	4	0	0	0	0	0	0	0	0	0	0	0	0	0	2	76	29.6	31.3	10	10	142	142	4.9	4.9	12	12	39	39	20	20	8.4	8.4	95	95	0.7	0.7	138	138	142	142	4.2	4.2	1.1
0	1	2	3	10	1	4	3	0	0	0	0	0	0	0	0	0	0	0	0	0	16	63	11.5	23.1	3.5	7.5	151	216	6.2	14.2	10	16	20	24	72	76	7.5	8.2	113	115	2.4	2.9	97	216	143	148	4.1	5	0.7
0	0	2	3	7	5	1	1	0	0	0	0	0	0	0	0	0	0	0	0	0	4	90	34.5	34.5	12.2	12.2	137	137	10.1	10.1	11	11	33	33	16	16	7.2	7.2	99	99	0.7	0.7	102	102	141	141	2.3	2.3	1.1
0	1	1	2	14	6	4	4	0	0	0	1	0	0	0	0	0	0	0	0	0	2	87	41.5	43.5	12.8	13.9	114	139	15.1	17.5	15	17	24	27	28	32	8.3	9.2	103	104	1.6	1.8	103	117	140	142	3.8	3.9	4.2
0	1	4	3	13	6	3	4	0	1	0	0	0	1	0	0	0	0	0	0	0	5	21	35.1	35.6	11.3	11.4	286	308	24.3	25.9	11	13	24	25	14	16	7.3	7.4	106	106	0.9	0.9	58	62	142	143	3.6	3.8	1
0	0	1	4	3	1	1	1	2	0	0	0	0	0	0	0	0	0	0	0	0	8	78	26.8	31.1	8.5	9.9	472	547	15	19.8	11	15	28	29	15	21	8.7	8.7	103	106	0.9	1.7	94	94	140	142	3.7	4.5	0.8
0	1	1	2	13	6	4	3	0	0	0	0	0	0	0	0	0	0	0	0	0	6	82	39.5	41	12.9	13.4	207	265	39.1	43	12	15	26	28	73	73	7.6	7.8	105	107	1.4	1.5	152	167	142	143	3.5	3.7	1.8
0	1	1	2	12	6	3	3	1	0	0	0	0	0	0	0	0	0	0	0	0	7	54	22.7	32.3	8.9	10.8	68	223	12.5	41.8	9	12	20	23	23	28	7.1	7.5	109	113	1	1.4	110	140	138	140	3.8	5.7	1.4
0	0	1	4	5	1	1	3	0	1	1	0	0	0	0	0	0	0	0	0	0	2	49	17.3	26.1	5.8	6.6	218	309	15.3	22.7	22	23	18	21	82	84	8.1	8.7	100	101	7.8	7.8	157	198	138	139	3.5	3.9	0.7
0	1	1	3	11	5	2	4	0	0	0	0	0	0	0	0	0	0	0	0	0	3	82	26.7	30.1	8.3	9.2	237	282	7.1	8.9	26	30	13	17	78	90	8.7	9	100	101	2.9	3.6	89	105	138	138	4.8	5.5	1.2
0	1	1	2	14	6	4	4	0	0	0	0	0	0	0	0	0	0	0	0	0	2	90	27.2	28.3	8.7	8.9	437	505	9.2	9.5	11	12	23	25	37	38	8.4	8.4	104	108	1.5	1.5	72	95	139	144	5.4	5.5	1.5
0	1	3	2	15	6	5	4	1	1	0	0	0	0	0	0	0	0	0	0	0	2	45	20.4	25.1	6.5	8.1	88	129	6.2	20.9	12	15	14	20	25	27	7.2	7.8	107	112	0.7	1	84	93	134	138	3.8	5.5	6
1	1	1	3	15	4	0	1	0	0	0	0	0	0	0	0	0	0	0	0	0	8	81	38.7	42.8	12.2	12.8	196	203	6.1	7.8	12	15	28	34	27	28	8.1	8.7	97	102	1.1	1.3	90	102	136	141	4.4	4.7	0.8
0	0	2	2	5	1	1	3	0	1	0	0	0	1	0	0	0	0	0	0	0	9	57	23	27.8	6.4	8.3	346	347	10.7	10.9	12	14	21	25	19	31	7.9	8.2	112	113	0.4	0.5	227	296	146	150	4	4.3	1.6
0	0	1	10	3	1	1	1	0	0	0	0	0	0	0	0	0	0	0	0	0	5	82	22	34.2	7.6	11	65	111	7.4	16.6	13	13	19	23	23	23	8.3	8.9	107	110	1	1.2	111	111	138	138	4.1	5	0.7
0	0	4	4	13	6	4	3	1	0	0	0	0	0	0	0	0	0	0	0	0	7	66	23.5	36	7.7	12.2	100	115	14.1	24.8	14	16	23	24	11	14	8.6	8.6	105	105	0.6	0.6	80	80	139	139	4.1	4.1	1.3
0	0	1	2	15	6	5	4	0	0	0	0	0	0	0	0	0	0	0	0	0	2	75	35.8	35.8	12	12	174	174	7	7	17	17	22	24	22	30	8.5	8.9	99	100	1	1.5	203	418	135	137	3.3	4.1	1.4
0	0	4	2	11	5	2	4	0	0	0	0	0	0	0	0	0	0	0	0	0	5	51	28.7	29.2	9.1	9.4	223	241	14.4	19.8	12	15	19	20	19	19	7.3	7.5	106	111	1.4	1.6	105	147	133	143	3.4	3.6	3.4
0	0	1	3	9	6	1	2	2	0	0	0	0	0	0	0	0	0	0	0	0	4	62	24.7	28.6	8.1	9.4	1048	1237	38	45.9	16	20	19	22	40	44	7.6	8	90	98	2.4	2.7	31	97	126	131	3.9	4.6	1
1	0	1	2	14	6	5	3	0	0	0	0	0	0	0	0	0	0	0	0	0	8	80	27	33.1	9.7	11.2	25	240	8.5	8.9	12	13	24	25	28	34	9.2	9.3	105	107	1.1	1.2	93	101	138	139	4.1	4.6	1.1
0	1	1	2	10	5	4	1	0	0	0	0	0	0	0	0	0	0	0	0	0	3	88	36.3	40.7	12.4	14.2	488	500	8.4	14.7	13	15	21	29	12	17	8.6	8.9	97	101	0.7	1	108	140	133	135	3.6	4.5	1
0	0	1	3	15	6	5	4	0	0	0	0	0	0	0	0	0	0	0	0	0	2	66	19.5	36	6.4	11.3	164	210	13.4	21	13	15	21	22	12	15	8.5	8.5	104	110	0.5	0.6	158	158	136	140	3.5	4.7	1.2
0	1	1	2	14	6	5	3	0	0	0	0	0	0	0	0	0	0	0	0	0	3	78	29.1	35	9.9	12	92	218	47.2	160.6	17	20	18	29	41	46	9	9.9	100	108	2.7	2.8	122	166	141	145	3.1	4.9	3
0	1	1	4	13	6	4	3	0	0	0	0	0	0	0	0	0	0	0	0	0	2	73	25.1	29.6	10.1	10.6	193	234	18.1	20	7	7	24	24	15	16	7.2	7.2	105	106	0.5	0.5	136	140	132	133	3.8	4.1	0.7
0	0	1	4	13	6	4	3	0	0	0	0	0	0	0	0	0	0	0	0	0	3	88	45.5	56	15.5	18.6	520	627	35.9	50.7	14	20	29	34	53	56	7.6	9.7	90	104	1.3	1.6	89	132	139	144	4.2	5	0.8
1	1	1	2	13	6	4	3	0	0	0	0	0	0	0	0	0	0	0	0	0	13	72	34.5	45	10.9	14.3	232	283	9.6	11.4	18	26	18	23	35	41	8.1	9.4	98	104	1.5	1.6	104	142	134	142	4.7	5.7	1.1
1	1	1	3	7	4	1	2	0	0	0	0	0	0	0	0	0	0	0	0	0	7	86	37.3	37.3	12.7	12.7	94	94	46.6	46.6	11	11	25	25	38	38	8.6	8.6	104	104	2.1	2.1	134	134	136	136	4.4	4.4	1.7
1	1	4	3	15	4	0	3	0	0	1	0	0	0	0	0	0	0	0	0	0	3	78	26.4	38.8	11	12.9	184	232	38.6	41	12	12	29	32	30	41	7.6	8.1	102	106	1	1.2	155	196	141	142	4.6	4.6	1.6
1	1	4	4	15	1	0	1	2	1	0	0	0	0	0	0	0	0	0	0	0	3	57	33.7	47.8	11.1	14.4	148	269	14.7	19.9	11	19	21	27	8	14	7.7	9	90	98	0.6	0.9	130	195	129	135	3.4	4.7	1.9
1	1	1	3	15	1	0	1	0	0	0	0	0	0	0	0	0	0	0	0	0	5	76	37.4	39.2	12.1	12.5	60	62	10.6	16.4	12	17	21	24	72	76	10.5	11.3	108	108	1	1	114	116	140	142	4.1	4.4	1.2
0	1	1	6	15	6	5	4	2	0	0	0	0	0	0	0	0	0	0	0	0	2	81	24.4	32.2	8.2	10.9	88	100	6.4	6.8	9	12	24	28	21	25	7.7	7.7	105	110	0.7	1.2	83	97	138	140	4	4.8	0.9
1	0	1	8	3	1	1	1	0	0	0	0	0	0	0	0	0	0	0	0	0	18	55	26.6	28.6	9.7	10.1	56	75	9	9.9	12	18	19	22	18	21	10.2	10.7	105	118	0.8	1.6	101	133	139	150	3.1	3.3	3.5
0	0	1	10	3	1	1	1	0	0	0	0	0	0	0	0	0	0	0	0	0	4	57	22.9	33.2	8	11.9	102	192	10.9	21.9	11	16	20	22	14	14	7.1	8.3	115	117	0.8	0.9	153	153	144	149	3.9	4.2	1.7
1	0	2	6	3	1	1	1	1	1	0	0	0	0	0	0	0	0	0	0	0	2	59	29.2	33.2	8.9	10.9	375	410	17.8	25.8	11	15	18	20	10	13	8.3	9.1	108	110	0.6	1.6	110	151	140	144	3.6	4	1.4
1	0	4	2	8	4	1	1	0	0	0	0	0	0	0	0	0	0	0	0	0	3	87	27.9	30.2	9.5	10	180	194	10.4	12.6	14	18	15	19	27	37	8.5	8.6	108	110	1	1.2	142	180	136	137	4.4	4.7	2.1
1	0	1	3	8	5	1	2	0	0	1	0	0	0	0	0	0	0	0	0	0	2	80	32.5	35.5	11.5	12.3	85	112	15.7	19	11	13	20	21	26	33	8	8.5	104	105	1.2	1.6	102	295	132	134	4	4.4	1.6
0	0	1	2	8	5	1	2	0	0	0	0	0	0	0	0	0	0	0	0	0	7	27	29.7	34	9.6	11.5	302	369	5.5	9.1	12	15	28	32	39	46	7.6	8.6	104	107	0.7	0.9	96	111	140	150	3.4	3.7	1
0	0	1	4	10	5	2	3	0	0	0	0	0	0	0	0	0	0	0	0	0	9	76	22.6	39.3	7.4	13.3	99	266	6.7	16	11	14	20	26	14	19	8.1	9.7	104	114	0.6	0.8	112	131	136	142	4.2	4.6	0.7
1	0	2	8	9	5	1	3	0	0	0	0	0	0	0	0	0	0	0	0	0	2	56	19.2	21.1	6.7	6.7	84	88	5.9	7.1	10	17	26	28	50	53	10.2	10.3	118	119	1.2	1.8	125	217	152	157	4.2	4.6	1.3
0	1	4	2	15	6	5	4	0	1	0	0	0	0	0	0	0	0	0	0	0	2	62	41.1	41.6	13.5	14	164	169	8.3	11.2	18	19	19	19	13	13	8.1	8.5	105	107	0.8	0.9	179	199	138	141	3.6	3.7	0.9
0	1	1	3	14	6	5	3	1	0	0	0	0	0	0	0	0	0	0	0	0	3	59	28.2	30.2	10	10.4	279	327	10.7	11.6	9	11	23	26	15	16	7.4	7.4	104	111	0.6	0.7	143	152	135	141	4.3	4.3	0.9
0	1	1	4	14	6	5	3	0	1	0	0	0	0	0	0	0	0	0	0	0	3	60	32	35.1	10.7	12	200	219	17.5	22.2	13	18	21	25	16	23	7.7	8	102	103	0.8	1.1	115	288	136	138	3.7	3.8	1.5
0	1	1	2	9	6	1	2	0	0	0	0	0	0	0	0	0	0	0	0	0	6	93	29.6	35.5	9.7	11	357	450	11	20.5	15	15	25	26	20	24	8.8	9.1	104	105	0.7	0.7	98	115	140	140	4.6	4.9	1.3
0	0	1	2	11	6	1	4	2	1	0	0	0	0	0	0	0	0	0	0	0	5	80	22.8	35.6	7.8	11.4	132	135	15.7	21.2	10	13	20	21	10	12	8.3	8.3	111	115	0.7	1	142	142	139	141	4.2	4.5	0.9
0	1	1	3	13	6	4	3	0	0	0	0	0	1	0	0	0	1	0	0	0	13	68	26.9	27.3	8.3	8.4	264	265	17.7	18.3	13	15	29	29	53	60	8.5	9.1	106	112	1.1	1.1	88	169	149	154	3.5	3.8	1.2
1	1	1	3	15	6	5	4	1	2	0	0	0	0	0	0	0	0	0	0	0	4	89	32.7	32.9	10.7	11	150	166	15.3	15.4	20	20	18	18	75	75	7.5	7.5	104	104	3.3	3.3	97	97	138	138	4	4	1.5
0	1	1	2	8	5	1	2	0	0	0	0	0	0	0	0	0	0	0	0	0	2	28	41.3	44.5	13.5	15.1	108	163	11.3	13.4	12	16	22	25	8	9	8.8	8.9	108	109	0.7	0.9	110	115	142	142	3.8	3.9	0.9
0	0	1	2	15	6	5	4	0	0	0	0	0	1	0	0	0	0	0	0	0	6	62	27.9	28.6	9.2	9.3	546	607	17.3	19.7	13	15	26	29	22	25	8.1	8.3	100	102	0.6	0.6	95	199	137	140	4	4.1	0.8
0	1	1	3	3	1	1	1	0	0	1	0	0	0	0	0	0	0	0	0	0	5	59	26.9	35.5	9.8	12.5	72	100	4.2	6.7	9	10	27	30	3	6	8.2	9	100	103	0.6	0.8	102	147	135	136	4.1	4.4	1.5
0	1	2	6	15	6	5	4	0	0	0	0	0	0	1	0	0	1	0	0	0	3	84	24.1	25.4	8.3	9	35	45	23.3	25.3	12	15	19	21	16	19	7.4	7.5	97	107	0.7	0.7	46	129	132	141	2.8	3.7	1.3
0	0	1	4	14	6	5	3	1	1	0	0	0	1	0	0	0	0	0	0	0	2	62	35.3	36.3	11.3	12.4	203	255	12.2	16.1	11	12	29	29	18	19	8.8	8.8	102	103	1.1	1.3	178	199	138	140	3.4	4.1	1.7
0	1	1	5	3	1	1	1	0	0	0	0	0	0	0	0	0	0	0	0	0	19	67	29.6	41.9	9.9	13.9	241	279	11	14.6	13	22	24	32	11	18	8	9.5	98	103	1.2	1.9	96	200	140	144	3.1	3.7	0.8
0	1	1	3	15	6	0	1	1	1	0	0	0	0	0	0	0	0	0	0	0	2	56	28.2	36.3	9.8	12.3	188	218	12	15.7	11	11	25	28	18	20	7.9	8.6	103	105	0.8	0.9	90	125	135	142	3.9	4	1.3
0	0	1	4	14	6	5	3	1	0	1	0	0	1	0	0	0	0	0	0	0	6	66	24.5	43.8	7.8	13.3	267	717	0.5	7.5	14	36	16	24	23	30	8.3	10	94	109	0.9	1.6	84	450	142	144	3.5	4.8	2.8
0	1	4	11	15	4	0	2	0	0	1	0	0	1	0	0	0	0	0	0	0	2	46	23.1	31.3	7.8	9.3	178	197	25.1	31.9	17	20	19	22	66	66	10	10	102	104	12.2	12.6	188	188	136	138	4.8	5.4	1.1
0	1	1	6	14	6	5	3	0	0	0	0	0	0	0	0	0	0	0	0	0	4	88	23.5	29.4	7.7	9.8	79	85	5.5	6.4	18	19	25	26	103	103	8.7	8.9	102	105	2.9	3	50	58	141	144	4.7	5	2.4
1	0	4	5	3	1	1	1	0	1	0	0	0	1	1	0	0	1	0	0	0	2	83	40.4	45.8	12.7	15	57	124	12.2	14.6	15	32	6	9	21	43	4.9	7.8	106	124	1	2.1	175	358	142	146	3.2	5.8	3.8
1	0	2	2	13	6	4	3	0	1	0	0	0	1	0	0	0	0	0	0	0	2	82	33.3	33.4	9.4	9.7	128	142	9.3	9.5	12	13	35	36	15	18	8.4	8.8	98	102	0.8	0.9	165	173	142	146	4.2	4.4	1
0	1	1	2	11	6	1	4	0	0	0	0	0	0	0	0	0	0	0	0	0	2	63	23.7	29.8	9.3	11.1	144	185	8.3	9.7	8	8	23	24	12	15	7.1	7.1	109	113	0.8	0.9	130	130	135	135	4.7	4.7	1
0	0	2	2	14	6	5	3	1	0	1	0	0	0	0	0	0	0	0	0	0	2	85	32.3	36	10.8	12.3	179	219	12.4	14.1	10	16	21	24	22	27	8.3	8.9	101	106	1.2	1.3	149	282	134	136	4.2	4.4	1
0	0	1	2	14	6	5	3	0	0	0	0	0	0	1	0	0	0	0	0	0	2	45	27.6	29.1	8.6	9.1	231	253	7.3	10.9	9	13	21	27	10	13	6.4	8.2	108	112	0.5	0.6	81	82	137	144	3.4	4.4	0.9
0	1	1	2	13	6	4	3	0	0	0	0	0	0	0	0	0	0	0	0	0	5	87	40.9	41.3	13.4	13.5	141	144	5.3	6.2	12	15	23	24	15	18	8.8	8.8	105	106	0.7	0.8	87	98	141	144	3.5	4.2	1.3
0	0	1	2	14	6	4	4	0	0	0	0	0	0	0	0	0	0	0	0	0	5	73	22.5	27.5	7.2	9.1	66	76	14.4	21.3	17	20	19	19	54	65	7.7	9.9	109	112	2	2.5	68	89	143	144	4.2	4.6	1.4
0	1	1	2	10	1	5	2	1	0	0	0	0	0	0	0	0	0	0	0	0	14	63	33.7	35.9	11.8	12.3	192	213	11.7	13.9	10	16	21	29	15	22	8.2	8.7	105	107	0.7	0.9	140	152	137	141	3.7	4.9	1.7
0	1	2	2	11	6	1	4	0	0	0	0	0	0	0	0	0	0	0	0	0	14	41	35.2	37.2	11.7	12.8	238	263	20	20.9	13	14	27	27	13	13	8.1	8.3	98	100	0.6	0.7	89	100	134	137	3.5	4	1.1
0	0	1	5	14	6	5	3	1	0	0	0	0	0	0	0	0	0	0	0	0	3	76	29.1	40.9	9.5	13.8	118	158	15.7	24.9	13	13	22	22	11	12	8.1	8.1	103	107	0.7	0.8	149	149	138	138	4.3	4.3	1.3
0	1	1	2	12	6	3	3	1	0	0	0	0	0	0	0	0	0	0	0	0	3	79	38.7	46	12.9	15.6	159	204	10.6	12.2	15	17	22	23	23	23	8.6	9.2	101	103	1.5	1.7	112	119	135	136	4.6	4.7	2.3
0	0	1	2	14	6	4	4	0	0	0	0	0	0	0	0	0	0	0	0	0	3	94	30.4	32.6	10	10.9	309	328	16.8	19.6	18	19	23	25	22	32	8.9	8.9	99	102	1.3	1.4	120	141	138	139	4	4.8	0.7
0	0	1	3	9	5	1	3	0	0	0	0	0	0	0	0	0	0	0	0	0	9	79	35	41.7	11.7	13.3	210	268	21.4	27.2	16	17	12	14	56	64	7.5	8.1	113	117	3.4	3.8	116	116	138	141	4.5	4.6	1.3
0	1	1	2	3	1	1	1	4	0	0	0	0	0	0	0	0	0	0	0	0	2	58	25.1	34.3	9.2	12.5	93	137	9.1	13.8	9	13	27	31	12	13	8.2	8.7	99	104	0.7	0.7	104	143	135	140	3.7	4.1	1.5
0	0	1	5	3	1	1	1	0	0	0	0	0	1	0	0	0	0	0	0	0	4	92	38.9	38.9	11.7	11.7	77	77	16	16	11	15	30	33	80	89	8	8.2	129	132	1.7	2.3	119	149	170	171	4.1	4.5	0.8
0	0	4	3	15	6	5	4	1	1	0	0	0	1	0	0	0	0	0	0	0	2	40	33.2	35.6	11.2	11.9	494	551	19.3	24.1	11	14	34	36	26	33	9.5	9.9	92	92	0.6	0.7	204	212	134	135	5	5.1	0.7
0	0	4	3	14	6	4	4	0	0	0	0	0	0	0	0	0	0	0	0	0	2	22	33	35.3	10.9	11.4	203	215	13.1	14	14	16	19	22	12	13	8.8	9	108	109	0.8	0.9	92	100	137	143	3.5	3.7	1.3
0	0	1	4	14	6	5	3	0	0	0	0	0	1	0	0	1	0	0	1	0	2	73	25.3	30.2	7.8	9.6	162	187	5.3	7.2	6	13	19	23	15	17	6.8	7.4	106	110	1	1.2	114	141	134	136	3.2	3.5	0.7
0	0	1	4	3	1	1	1	0	0	0	2	0	0	0	0	0	0	0	0	0	24	26	28.8	37.1	10.5	13.6	102	146	5.3	12.2	19	34	11	13	54	58	5.6	9.1	81	97	6.6	8	87	159	128	133	3.1	4.5	1.1
0	0	1	2	14	6	5	3	0	1	0	0	0	0	0	0	0	0	0	0	0	3	25	30.1	30.1	10.1	10.1	263	263	3	3	7	11	30	32	3	4	8.2	8.4	101	106	0.5	0.5	94	102	139	140	4	4.4	1.1
0	1	2	7	14	6	5	3	0	0	0	0	0	1	0	0	0	0	0	0	0	2	69	22.8	26.1	7.3	8.2	139	175	7.4	9.5	19	21	12	13	127	136	7.7	7.8	110	111	7.6	7.9	69	128	143	143	5.1	5.8	0.9
0	0	1	4	15	6	5	4	1	1	1	0	0	0	0	0	0	0	0	0	0	2	77	29.9	43	9.9	14.3	336	475	10.6	11.6	18	24	20	22	19	42	7.2	7.8	89	100	1	1.8	129	185	129	141	3.7	4.7	3
0	1	4	4	14	6	5	3	0	0	0	0	0	0	0	0	0	0	0	0	0	3	66	27.3	33.8	9.6	12.2	69	104	5.1	7.6	10	12	20	23	9	12	7.6	7.6	109	114	0.5	0.8	112	136	139	140	3.6	4.3	0.8
0	0	4	3	15	1	0	1	1	0	0	0	0	0	0	0	0	0	0	0	0	11	49	20.8	35.4	7.5	12	47	88	4.4	13.1	9	21	12	28	6	8	8.7	9.7	105	110	0.5	0.6	104	162	136	143	3.7	4.2	1.6
0	0	1	4	13	6	4	3	0	0	0	1	0	0	0	0	0	0	0	0	0	5	43	18	28	5.7	9	55	180	4.9	14.4	7	17	20	24	40	45	7.8	9.8	103	114	1.1	1.3	130	193	139	145	4.9	6.4	1.3
1	0	4	3	12	5	4	3	2	1	0	0	0	0	0	0	0	0	0	0	0	13	80	36.1	42.6	11.7	13.4	164	189	10.5	13.6	17	19	13	18	40	55	6	7.3	108	111	2.2	2.9	113	126	143	143	4.7	5.4	2
0	1	1	4	13	6	4	3	0	0	0	0	0	0	0	0	0	0	0	0	0	2	69	28.6	29.1	9.1	9.7	129	166	4.1	6.4	15	21	16	20	27	28	8.2	8.2	101	108	4.8	4.9	60	124	134	139	3.8	4.3	1.7
1	1	1	6	15	6	5	4	0	0	0	0	0	0	0	0	0	0	0	0	0	4	74	26	26.3	8.6	8.8	49	52	7.5	8.8	18	21	26	29	47	54	7.6	7.8	98	98	5	5.4	153	259	141	141	3.9	4	1.2
0	1	1	4	14	6	5	3	0	0	0	0	0	0	0	0	0	0	0	0	0	2	57	26.3	29.7	8.5	9.6	182	258	10.4	14.2	13	14	21	24	18	19	7.8	8.6	103	105	1.5	1.6	90	90	134	138	3.7	4	1
0	0	1	7	14	6	4	4	0	0	0	0	0	0	0	0	0	0	0	0	0	4	85	23.4	32	7.9	11	105	143	12.2	20.2	12	15	21	24	19	20	9	9	109	112	0.9	1	84	147	141	144	4.2	4.8	1.7
0	0	4	2	3	1	1	1	0	1	0	0	0	0	0	0	0	0	0	0	0	17	69	33	34.2	11.3	11.9	192	207	3.6	5	11	15	18	18	18	23	6.9	7.1	111	115	1.3	1.6	149	204	142	144	4	4.3	1.1
1	1	4	3	3	1	1	1	1	0	0	0	0	0	0	0	0	0	0	0	0	3	61	36	36.9	11.3	11.7	242	243	5.9	8.1	14	16	21	22	24	32	8.5	8.6	114	114	1.9	2.4	90	118	145	146	4.6	5	0.9
0	1	1	3	12	6	4	2	0	0	0	0	0	0	0	0	0	0	0	0	0	5	72	31.5	40.4	10.5	13.6	89	151	2.7	6.1	10	14	25	25	44	49	8.5	9.7	104	109	1.2	1.6	103	134	139	140	3.9	3.9	1.4
1	0	4	4	3	1	1	1	0	1	0	0	0	1	1	0	0	0	0	0	0	2	45	33.4	45	11.6	15.2	83	197	19	39.2	11	30	6	16	16	23	6.8	7.4	108	123	1.4	1.7	86	156	141	146	2.8	4.8	1.5
1	1	1	11	4	1	1	2	0	1	0	0	0	0	0	0	0	0	0	0	0	2	86	20.3	24.4	5.8	8.1	111	195	5.2	15	23	35	10	19	67	72	7.2	8.1	103	105	2.3	2.6	171	626	143	145	2.8	5	4.4
0	1	1	3	14	6	5	3	1	0	0	0	0	1	0	0	0	0	0	0	0	3	39	28.6	35.5	9.4	11.5	139	227	9.9	18.2	8	9	24	27	11	11	7.7	7.7	106	109	0.7	0.7	97	97	137	138	3.9	4.2	1
1	0	1	4	14	6	4	4	0	0	0	0	0	0	0	0	0	0	0	0	0	2	87	32.9	39.4	10.8	13.2	276	330	6.4	8	16	20	13	16	26	28	7.7	7.7	108	111	1.3	1.4	133	214	137	139	4.2	4.3	3.3
0	1	4	7	6	1	1	4	0	1	0	1	0	1	0	0	0	0	0	0	0	8	76	33.2	37.9	10	11.4	37	131	6	12.1	14	18	13	20	50	55	7.5	8.5	115	118	1.6	2.4	219	378	148	153	3.6	3.9	4.1
0	1	1	9	3	1	1	1	0	2	0	0	0	1	0	0	0	0	0	0	0	17	69	30.5	40.5	10.1	13.4	148	193	12.6	16.3	12	18	20	24	37	39	7	7.5	105	110	1.4	1.8	156	220	138	142	3.8	7.3	1.8
0	1	1	8	11	6	1	4	2	0	0	0	0	0	0	0	0	0	0	0	1	9	57	34.3	41.7	11.4	14.1	211	257	9.6	9.8	13	17	32	38	43	56	6.7	8.5	94	101	3.3	4.7	109	160	140	146	3.8	4.4	1.7
0	1	4	3	3	1	1	1	0	0	0	1	0	0	0	0	0	0	0	0	0	8	60	41.9	44	13.8	14	187	233	7.5	9.7	12	13	32	32	11	20	8.8	8.8	97	100	1.1	1.2	96	190	136	140	4.6	4.7	1.8
0	1	1	2	14	6	5	3	0	0	0	0	0	0	0	0	0	0	0	0	0	4	64	24.8	31.2	8.2	10.6	210	255	10.2	12	12	12	25	27	13	14	8.9	8.9	105	106	0.6	0.6	120	120	139	141	3.7	4.5	1.9
0	0	1	3	7	5	1	1	0	1	0	0	0	0	0	0	0	0	0	0	0	3	67	39.7	39.7	13.5	13.5	338	338	5.7	5.7	12	15	25	30	6	8	7.8	8.4	88	96	0.5	0.6	80	115	125	134	3	4.1	1.1
0	1	1	5	9	5	1	3	0	0	0	0	0	0	0	0	0	0	0	0	0	13	76	38.6	40.1	12.7	13.8	298	343	4.1	8.4	15	15	19	20	13	13	7.6	7.6	102	102	0.8	0.9	53	84	131	131	4.5	4.5	1.1
0	1	4	7	14	6	5	3	1	0	0	0	0	0	0	0	0	0	0	0	0	2	33	41.2	43.6	14.3	14.3	79	108	8.8	15.8	15	30	13	25	25	29	6	7.4	103	108	2.3	2.6	94	175	137	144	4.2	9.2	1.4
1	0	1	4	3	1	1	1	1	0	1	0	0	0	0	0	0	0	0	0	0	10	91	28.6	29.5	9.4	9.7	194	209	6.6	6.8	9	16	29	31	33	44	8.5	9.3	98	107	1.3	1.4	136	163	140	141	4	4.5	0.7
0	1	1	7	13	6	4	3	0	0	0	0	0	0	1	0	0	0	0	0	0	5	55	35.4	36.2	11.5	11.8	217	259	19	21.8	15	18	21	26	30	43	7.6	7.8	106	106	5.3	7.1	116	126	140	143	3.5	4.6	1.1
0	1	4	11	12	5	4	3	0	0	0	0	0	0	0	0	0	0	1	0	0	2	59	30.1	31.5	10.4	10.4	22	26	8.6	8.8	23	25	19	21	97	107	8.5	8.9	96	97	3.9	4.1	129	147	131	135	5.1	8.6	2.5
0	1	1	3	11	6	1	4	0	1	0	0	0	0	0	0	0	0	0	0	0	11	85	35.3	36.5	12.2	12.5	268	295	11.3	13.2	14	14	22	23	39	42	8.7	8.9	110	111	1.5	1.6	184	207	143	143	3.8	3.9	1.3
0	1	1	2	13	5	4	4	0	0	0	0	0	0	0	0	0	0	0	0	0	3	80	27.2	32.8	8.5	10.2	395	512	11.9	16.3	18	20	21	24	32	32	8.4	8.7	99	104	1.5	1.6	240	472	137	139	3.9	4.7	1.2
0	0	4	3	12	6	2	4	1	0	0	0	0	0	0	0	0	1	0	0	0	7	75	31.3	34.5	9.8	10.9	163	176	9.2	12.2	12	15	19	20	53	54	8	8.4	108	111	1.7	2	140	220	142	145	4.8	5.1	1.4
0	1	1	5	14	6	5	3	0	1	0	0	0	0	0	0	0	0	0	0	0	4	67	18.2	25.6	7.5	9.2	16	42	3.4	4.7	11	14	28	32	38	45	7.8	7.8	96	98	1.1	1.2	167	209	134	138	2.5	3.7	2.3
0	1	1	3	15	5	0	4	0	0	0	0	0	0	0	0	0	0	0	0	0	3	70	28.5	43.5	10	15.2	171	248	7.7	15.7	11	15	23	26	15	26	10.3	10.3	100	106	0.8	1.1	119	152	134	139	3.8	4.2	3.8
0	0	1	5	14	6	5	3	1	0	0	0	0	0	0	0	0	0	0	0	0	3	72	29.3	40.8	9.1	12.9	104	208	6.1	8.3	14	20	16	20	30	38	7.8	8.6	95	101	1.2	1.6	112	160	125	131	4.1	5.6	1.5
0	0	1	2	3	1	1	1	1	1	0	0	0	0	0	0	0	0	0	0	0	26	71	28.6	38.1	11.1	12.5	83	133	5.5	10.7	12	22	16	24	14	20	9	10.1	102	109	0.8	1	132	276	136	142	3.3	4.7	1.4
0	0	1	3	4	2	1	1	2	0	0	0	0	0	0	0	0	0	0	0	0	7	75	23.3	31.1	7.8	10	148	212	16.3	25.4	16	17	20	23	40	41	9.9	9.5	111	113	1.3	1.7	117	117	145	145	4.9	5.1	0.7
0	0	4	2	14	6	5	3	0	0	0	0	0	0	0	0	0	0	0	0	0	9	72	26	33.6	9	11.7	162	254	9.1	13.5	10	14	26	28	10	10	7.1	7.4	107	109	0.6	0.6	86	173	143	144	3.4	3.6	1.5
0	1	1	4	4	1	1	2	0	1	0	0	0	1	0	0	0	0	0	0	0	2	29	25.9	41.7	9.1	15.2	152	263	5	16.2	15	26	11	20	56	90	4.8	6.7	94	102	5.3	7.7	91	111	131	136	4.9	6.6	0.8
0	1	1	2	10	6	1	3	0	1	0	0	0	0	0	0	0	0	0	0	0	12	38	17.5	23.3	5.9	7.2	97	168	9.7	14.1	11	14	23	25	24	27	7.2	7.7	105	106	1	1.2	94	140	138	139	3.1	3.5	1.6
0	1	4	3	13	6	4	3	0	1	0	0	0	0	0	0	0	0	0	0	0	7	51	35.8	43.3	11.4	13.9	146	241	8.5	28.8	9	11	23	23	16	22	8.1	8.2	106	109	0.8	1.2	118	137	140	141	4.6	4.9	0.9
0	0	1	6	11	6	1	4	2	0	0	1	0	0	1	0	0	0	0	0	0	20	64	30.3	37.5	9.7	11.3	195	236	9.1	20.3	3	15	21	24	15	18	7.2	8.3	104	112	0.6	0.6	126	153	132	137	3.5	4.1	1.1
0	1	1	6	9	5	2	2	0	0	0	0	0	0	0	0	0	0	0	0	0	3	58	29.7	32.1	9.7	10.3	35	41	10.7	14	12	13	27	30	17	21	8.2	8.7	101	108	1	1.1	115	282	137	145	3.3	3.4	2.4
0	1	4	6	9	5	1	3	1	0	0	0	0	0	0	0	0	0	0	0	0	16	72	34.2	41.3	11.8	13.5	193	211	21.8	22.9	12	17	18	21	19	22	8.5	8.5	112	119	0.9	1.1	141	145	139	149	4.5	5.2	1.8
0	1	1	4	15	6	5	4	1	1	0	0	0	1	1	0	0	0	0	0	0	2	61	22.7	30.2	7.3	9.7	64	105	6.4	13.6	10	14	19	20	20	24	7.8	8.4	105	110	1.6	2	125	252	139	140	3.9	4.7	0.9
0	0	4	4	9	5	1	3	0	0	0	0	0	0	0	0	0	0	0	0	0	4	21	26.5	28.5	8.4	9.1	226	260	5.9	8.1	9	10	18	20	10	15	7.1	8	117	123	0.4	0.5	106	115	143	146	3.7	3.9	0.8
0	0	1	6	15	6	5	4	0	1	0	0	0	0	0	0	0	0	0	0	0	3	45	19.5	26.2	6.8	9.4	9	25	11.5	13.4	13	17	23	30	12	15	8.3	9	99	102	0.7	0.8	110	154	134	142	3.4	4.5	1.2
1	0	1	3	3	1	1	1	1	0	0	0	0	0	0	0	0	0	0	0	0	10	74	33.3	38.3	11.1	12.9	56	161	0.5	1.3	14	18	19	22	48	48	6.8	7.7	108	112	1.4	1.5	277	295	141	144	3.9	4	3.6
1	0	1	8	15	1	0	1	0	0	0	0	0	0	0	0	0	0	0	0	0	7	87	18.2	28.1	6.3	10	32	139	3.7	13.5	12	19	22	22	27	29	8.2	8.5	107	112	1.4	1.8	172	172	141	143	4.8	4.9	1.9
0	1	4	9	14	6	4	4	1	1	0	0	0	2	0	0	0	0	0	0	0	15	30	24.5	25.6	7.7	8.1	360	398	16.8	19.7	23	24	16	18	93	97	8.7	8.9	102	105	4	4.3	123	133	139	141	3.9	4.1	1.7
0	1	4	7	15	6	0	4	1	0	0	0	0	0	0	0	0	0	0	0	1	5	39	20.2	28.3	6.6	9.7	56	95	6.8	30.8	12	15	20	23	11	14	7.8	9.3	101	105	1.5	1.8	157	215	136	140	4.4	5.1	1
0	1	1	3	14	6	5	3	0	0	0	0	0	0	0	0	0	0	0	0	0	11	60	36.9	36.9	12.6	12.7	192	193	10.1	12	13	14	23	23	18	18	8.3	8.3	111	112	1	1	161	207	143	144	4.3	4.8	1.3
0	1	1	3	8	5	1	2	0	0	0	0	0	0	0	0	0	0	0	0	0	6	63	35.1	35.8	12.1	12.4	267	282	14.3	22.3	18	18	20	21	13	16	8.5	8.8	102	106	1	1	129	138	137	140	3.7	4.4	2
1	0	4	4	13	6	4	3	0	0	0	0	0	0	0	0	0	0	0	0	0	13	70	21.9	32	6.4	9.4	344	401	26.4	40.3	12	14	17	20	17	19	6.8	7.9	101	110	1.1	1.4	99	174	127	136	3.8	5	1.9
0	1	1	2	10	6	1	3	0	0	0	0	0	0	0	0	0	0	0	0	0	5	52	33.6	39.3	12.8	13.3	168	278	23.6	27.9	8	12	20	22	15	16	6.2	7.8	108	114	1.1	1.3	96	108	136	140	4.1	5.6	1.1
0	0	1	2	14	6	5	3	0	0	0	0	0	0	0	0	0	0	0	0	0	3	68	22.7	30.3	7.2	9.4	582	751	10.2	19.1	12	18	24	32	20	23	8	8	100	102	0.9	1.3	167	280	138	140	4.9	5.4	0.6
0	1	1	2	15	6	0	3	0	0	0	0	0	0	0	0	0	0	0	0	0	2	58	39.7	46.2	13.9	16.1	184	234	4.4	5.6	12	17	25	25	16	21	9.1	9.1	100	105	0.7	0.9	119	167	138	138	3.8	3.9	1
1	0	2	5	7	4	1	2	0	0	0	0	0	0	0	0	0	0	0	0	0	4	80	35	40.1	12.2	13.7	175	203	6.7	13.5	13	14	19	23	14	22	6.8	8.1	102	108	0.3	0.6	115	190	134	141	3.2	3.8	2.7
0	1	1	3	10	6	1	3	0	0	0	0	0	0	0	0	0	0	0	0	0	6	57	44	44.7	13.7	13.9	238	258	9.4	11.8	6	11	40	44	17	27	8.7	9.1	96	98	0.5	0.8	132	163	142	142	4.4	5.2	1.4
0	0	1	6	10	6	1	3	0	0	0	0	0	0	0	0	0	0	0	0	0	13	83	21.2	34.3	7.1	9.7	95	146	7.2	16.1	16	16	20	26	12	12	8.1	8.6	111	112	0.6	0.7	125	150	143	143	4	4	1
0	1	1	4	13	6	4	3	0	0	0	0	0	1	0	0	0	0	0	0	0	2	79	32	36.9	10.3	11.9	194	233	20.1	26.5	13	15	21	23	37	44	7.4	7.5	99	105	1.9	2.2	87	327	132	137	3.1	3.4	0.8
1	0	1	5	8	5	1	2	0	0	0	0	0	0	0	0	0	0	0	0	0	8	81	26.1	31.6	8.8	10.6	119	199	6.3	12.7	13	16	17	18	25	28	8	8.1	108	113	1.3	1.5	127	298	138	141	4	4.5	1.4
0	0	4	3	7	5	1	1	3	0	0	0	0	0	0	0	0	0	0	0	0	28	84	34.5	36.9	11.4	12.2	216	218	9.3	17.8	11	14	28	30	19	21	9	10.1	107	110	0.5	0.7	100	124	145	148	3.2	4.1	2.1
0	0	1	3	15	6	5	4	0	0	0	0	0	0	0	0	0	0	1	0	0	8	53	33.5	33.5	11.2	11.2	153	153	27.1	27.1	15	16	20	22	62	68	8	8.5	109	111	4	4.1	121	138	141	144	3.5	4	1
1	1	4	4	10	5	1	4	0	2	0	0	0	0	0	0	0	0	0	0	0	7	57	17.1	28.9	5.7	9.6	43	204	4.1	22.6	8	15	12	20	58	61	8.7	9.3	96	103	1.3	1.5	131	278	125	131	6	8.1	2.1
1	1	4	5	10	5	4	1	0	1	0	0	0	1	0	0	0	0	0	0	0	2	90	29.7	38.5	9.4	12	56	79	20	22.5	13	15	15	16	13	13	7.1	7.4	120	122	1.4	1.6	69	112	146	147	3.7	3.9	1.8
0	1	1	3	14	6	4	4	0	0	0	0	0	0	0	0	0	0	0	0	0	4	90	29.1	33.3	9.7	10.8	198	258	8.5	11.7	10	14	25	28	19	28	7.9	8.5	105	106	1.1	1.7	118	190	140	140	3.7	4.2	0.7
0	0	1	2	14	6	4	4	0	0	0	0	0	0	0	0	0	0	0	0	0	2	90	30.5	34.4	9.8	11	208	235	8.6	10.1	15	20	19	21	22	25	8.5	8.6	106	109	1.6	1.7	92	112	137	141	4.2	4.6	1.1
1	0	4	7	6	1	1	4	1	1	0	0	0	0	0	0	0	0	0	0	0	20	57	24.5	26.8	7.7	8.4	127	165	8.9	19.8	13	17	20	24	59	64	7.8	8	103	103	3.9	4.6	108	117	135	136	4.4	4.6	1.2
0	1	1	2	3	1	1	1	0	0	1	0	0	1	0	0	0	0	0	0	0	16	66	21.3	42.9	7.7	15	104	250	5.2	12.8	10	10	24	29	15	21	9.2	9.2	102	110	0.7	1	113	132	137	139	4.1	5.1	1
0	1	1	4	15	6	5	4	0	0	0	0	0	0	0	0	0	0	0	0	0	2	66	30	36	9.8	11.7	372	413	57.4	65.7	16	20	22	22	12	14	7.5	8.4	89	101	0.8	1.1	143	196	131	139	3.5	4.2	1.3
0	0	2	4	7	4	1	2	0	0	0	0	0	1	0	0	0	0	0	0	0	7	29	22.9	24	7.6	8.2	191	218	5.8	10.2	8	12	27	27	8	9	7.2	7.7	98	105	0.7	0.8	135	158	134	136	3.1	4.4	0.7
0	0	1	9	13	6	4	3	0	1	0	0	0	0	0	0	0	0	0	0	0	8	84	34.3	37	9	9.8	462	556	10.3	17.1	15	19	17	21	37	39	7.1	7.7	101	102	1.8	1.9	127	243	137	140	5	5.9	1.3
0	0	1	2	5	1	1	3	0	0	0	0	0	0	0	0	0	0	0	0	0	15	62	33	33.9	10.6	10.8	304	343	12.5	12.8	14	15	21	24	11	11	9	9.2	101	105	0.5	0.5	91	112	139	141	4.1	4.4	0.8
0	0	1	2	13	6	4	3	0	0	0	0	0	0	0	0	0	0	0	0	0	2	61	24.1	26	8.1	8.5	82	104	5.8	7.1	13	13	23	23	14	14	7	7.2	104	106	0.5	0.5	97	113	136	138	3.9	4	0.3
0	0	1	5	15	6	5	4	0	0	1	0	0	0	0	0	0	0	0	0	0	2	38	26.8	36.7	8.9	12.1	84	134	7.5	18	16	17	20	21	18	20	8.2	8.5	101	106	0.5	0.7	139	148	133	139	4.2	4.8	1.9
0	0	1	9	9	5	1	3	0	0	0	0	0	0	0	0	0	0	0	0	0	13	48	31.4	34.8	11.8	11.8	37	46	4.2	5.8	10	12	24	24	18	20	7.8	8	120	121	0.7	0.7	103	104	149	152	3.8	3.8	1.3
0	1	4	7	9	5	2	2	2	0	1	0	0	0	0	0	0	0	0	0	0	6	60	29.6	32.3	10.4	10.8	70	104	9.6	15.5	11	14	18	21	33	42	6.8	7.7	107	109	1.2	1.5	81	124	135	137	3.4	4.6	2.4
0	1	1	2	14	6	4	4	0	0	0	0	0	0	0	0	0	0	0	0	0	2	78	27.3	30.4	10.5	10.5	281	281	15.6	15.6	15	15	20	20	49	49	8.7	8.7	109	109	1	1	160	160	140	140	4.3	4.3	1.4
1	1	4	5	12	6	2	4	2	1	0	0	0	0	0	0	0	0	0	0	0	10	77	29.7	31.8	9.4	9.9	141	245	8.3	12.2	15	24	7	17	20	28	7.7	8.2	100	111	1.2	2.2	173	205	136	140	4.7	6.8	3
0	1	2	4	10	6	1	3	0	0	0	0	0	0	0	0	0	0	0	0	0	8	62	22.1	34.3	7.7	11.7	169	234	12.4	16.3	15	25	8	13	63	74	7.8	9.6	110	120	3.9	4.7	142	554	139	145	2.9	6.9	1.8
0	0	4	6	13	6	4	3	1	0	0	0	0	0	0	0	0	0	0	0	0	9	47	33.4	44.9	11.8	15.1	318	392	3.7	6.1	13	19	18	22	10	11	7.5	7.8	107	108	0.6	0.6	100	192	137	141	3.9	4.6	1
0	1	1	5	15	6	5	4	1	1	0	1	0	0	0	0	0	0	0	0	0	3	58	39.4	42.1	13.6	14.3	201	207	27.7	31.6	18	19	20	23	33	44	8.7	8.8	93	98	1.1	1.9	204	221	134	137	4.1	4.3	3.3
0	1	4	2	13	6	4	3	1	0	0	0	0	1	1	0	0	0	0	0	0	4	76	10.8	16.3	3.3	5	125	257	17.7	24.4	21	24	20	23	137	138	7.6	7.6	106	107	5.9	6.2	293	307	150	151	4.2	4.4	2
0	1	1	2	15	6	5	4	0	1	0	0	0	0	0	0	0	0	0	0	0	4	50	37	45.3	12.5	15.4	287	401	13.5	18.9	15	19	25	28	25	31	8.3	8.6	100	102	0.8	0.9	182	188	140	141	3.6	4	1.3
0	0	2	2	14	6	4	4	0	0	0	0	0	1	0	0	0	0	0	0	0	2	41	37.2	37.2	12.8	12.8	259	259	14.3	14.3	11	11	34	34	16	16	9.3	9.3	100	100	1	1	126	126	140	140	4.8	4.8	1.5
0	0	4	2	9	6	1	2	0	0	0	0	0	1	0	0	0	1	0	0	0	31	84	22.5	27.1	7.4	8.8	114	166	26.8	36.2	14	19	18	23	26	28	7.1	8.3	107	111	1.4	1.8	137	170	139	143	4.7	5.5	1.6
0	1	1	2	15	6	5	4	0	0	0	0	0	0	0	0	0	0	0	0	0	2	90	28.7	40	11.2	13.4	175	199	10.2	11.7	12	14	19	24	33	35	7	8	111	113	1.2	1.5	95	126	140	144	4.4	6.7	2
0	0	1	4	6	1	1	4	0	0	0	0	0	0	0	0	0	0	0	0	0	19	62	26.3	33	8.3	10.7	146	229	8.9	19	14	17	21	23	17	22	8.1	9.3	94	101	0.7	1.1	224	254	132	137	4.1	5.1	1.3
1	0	4	7	12	5	4	3	0	0	0	0	0	0	0	0	0	0	0	0	0	3	63	23.1	25	8.3	8.9	9	27	0.4	0.5	11	17	25	28	88	90	6.9	8	105	109	0.9	0.9	131	244	143	145	4.1	4.3	1.7
0	0	2	2	9	5	1	3	0	0	0	0	0	0	0	0	0	0	0	0	0	5	85	22.1	29	7.2	9.1	117	204	7.8	10.5	14	21	18	19	38	42	7.9	8.4	104	113	1.2	1.8	121	165	139	143	3.3	4.1	2
0	0	1	2	14	6	4	4	0	0	0	0	0	0	0	0	0	0	0	0	0	2	74	38.4	41.1	12.9	13.5	218	262	12.9	14.2	11	15	26	26	14	17	7.6	7.9	107	108	0.3	0.5	105	117	142	144	3.4	3.8	2
0	1	1	3	12	5	4	3	1	0	0	0	0	0	0	0	0	0	0	0	0	5	84	30.9	35.1	11.2	12.1	223	281	8.8	26.1	10	17	24	25	40	45	7.4	8.5	103	109	1.6	1.8	121	151	139	140	4.3	4.6	0.9
0	1	4	3	9	5	1	3	0	0	0	0	0	0	0	0	0	0	0	0	0	30	79	23.5	28.4	8.1	9.2	129	158	12	18	9	13	27	31	24	26	7.8	8.3	106	109	0.8	0.9	105	196	141	145	3.1	3.7	1.6
1	0	2	2	10	6	1	3	0	1	0	0	0	1	0	0	0	0	0	0	0	3	90	38.4	38.9	11.6	11.7	277	323	6.4	6.7	17	18	27	27	37	42	9.2	9.6	98	102	1.4	1.6	117	167	137	139	5.7	5.8	0.7
0	0	1	3	3	1	1	1	0	0	0	0	0	0	0	0	0	0	0	0	0	7	72	27	27.4	8.3	8.7	224	261	5.1	8.3	10	10	23	25	20	25	8.5	8.7	104	108	0.9	1	107	130	132	139	4.3	4.5	0.8
1	0	1	6	15	6	0	4	0	1	0	0	0	1	0	0	0	0	0	0	0	3	82	29.9	33.5	10	11.2	227	264	13	16.9	15	17	17	19	30	32	7.5	8.5	102	103	1.7	2	119	160	130	134	3.6	4.4	0.9
1	0	4	3	3	1	1	1	0	1	0	0	0	1	1	0	0	0	0	0	0	5	69	33	37.2	10.8	11.6	264	437	10.6	30.4	19	32	11	23	40	48	6.8	7.8	96	102	2.8	3.2	125	280	135	140	2.8	4.4	3.8
1	0	4	9	3	1	1	1	0	0	1	0	0	0	0	0	0	0	0	0	0	6	79	22	26.1	8.4	8.9	70	75	3.2	7.8	19	25	18	21	121	130	8.7	8.8	96	100	4.8	5.1	91	131	132	135	5.2	7.1	1.1
0	0	1	9	10	5	2	3	1	0	1	0	0	0	0	0	0	0	0	0	0	4	90	34.6	36	10.5	11.1	114	141	8.2	13.8	14	15	23	24	34	35	7.4	7.7	100	105	2	2.1	108	142	135	139	3.2	4.1	1.2
1	1	1	4	3	1	1	1	2	0	0	0	0	1	0	0	0	0	0	0	0	22	77	27.2	29.6	9.2	10	92	110	7.1	9.8	11	14	17	19	107	108	7.2	7.6	116	118	2.5	2.5	94	135	142	144	4.1	4.5	0.8
0	1	1	2	15	1	0	1	0	0	0	0	0	0	0	0	0	0	0	0	0	2	22	47.4	56.3	17.2	19.6	153	219	13.7	23.9	14	30	17	22	27	39	8.9	10.7	93	104	0.9	1.7	140	219	132	136	3.9	5.7	1.3
0	1	1	5	6	4	1	1	0	1	0	0	0	0	0	0	0	0	0	0	0	4	46	20	29.5	7.3	10.3	75	116	12	16	15	19	13	17	44	75	8.2	9.4	92	99	1.9	3	121	149	123	131	5.5	6	2.4
0	1	1	10	15	1	0	1	2	0	0	0	0	0	0	0	0	0	0	0	1	2	48	21.8	29.4	7.1	9.6	97	139	7.6	16.1	23	23	20	21	37	46	9	8.8	97	99	6.1	7.2	142	142	132	132	5.4	7.6	0.6
0	0	4	2	14	6	5	3	0	1	0	0	0	0	0	0	0	0	0	1	0	2	84	32.5	40.9	10.9	13	160	245	6.7	8.3	11	13	24	27	9	9	8.3	9.5	106	109	0.7	0.7	84	122	140	143	3.8	4.3	1.1
0	1	1	2	14	6	5	3	0	0	0	0	0	0	0	0	0	0	0	0	0	3	55	24.4	32.6	8.3	10.9	133	179	8	19.9	9	15	21	23	14	15	7.5	7.8	102	110	0.7	1	104	104	138	138	4.7	4.9	1.1
0	0	1	2	11	6	1	4	0	0	0	0	0	0	0	0	0	0	0	0	0	7	64	30.4	34	9.6	10.8	298	331	12.2	12.9	9	10	25	25	43	54	8.6	9	113	115	1.2	1.4	93	100	142	145	5.2	5.2	0.8
0	1	1	7	10	6	1	3	0	1	0	0	0	0	0	0	0	0	0	0	0	13	86	12.7	30.8	4.3	11.7	49	106	2.8	6.1	12	12	23	27	14	17	7.7	8.6	108	111	1.2	1.4	131	131	145	145	5.1	5.1	0.9
0	1	1	3	14	6	5	3	0	0	0	0	0	0	0	0	0	0	0	0	0	4	72	24.1	29.7	8.2	10.7	320	435	11.9	18.4	13	17	20	25	19	23	7.8	8	98	103	0.6	0.8	106	280	131	137	4.2	5.1	1.2
0	0	1	6	3	1	1	1	0	0	0	0	0	0	1	0	0	0	0	0	0	8	69	24.7	28.3	7.6	8.7	131	148	18.8	21.2	19	20	19	22	27	30	7.9	8	103	106	1.5	1.6	146	197	138	140	4.1	4.7	2.4
0	0	1	2	15	6	5	4	5	0	0	0	0	0	0	0	0	0	0	0	0	3	79	23.5	38.2	7.9	13	125	175	4.5	10.6	11	11	20	21	10	11	8.2	8.2	104	110	0.8	0.8	132	132	131	137	3.9	4.7	0.7
0	1	4	5	10	6	1	3	0	0	0	0	0	0	0	0	0	0	0	0	0	59	47	37.1	40	11.7	12.9	155	242	14.1	21.4	22	26	11	16	74	78	7.9	8.4	104	106	9.7	10.8	113	172	136	139	5.2	5.7	0.7
0	1	1	6	3	1	1	1	1	0	0	0	0	0	0	0	0	0	0	0	0	3	83	26.4	31.9	8.3	10	176	179	12.3	16.9	12	12	23	23	18	23	8.7	8.7	106	108	0.9	1.3	145	145	141	141	4.4	5.2	1.1
0	0	1	4	14	6	4	4	1	0	0	0	0	0	0	0	0	0	0	0	0	3	78	28.6	47.1	9.8	15.6	113	158	13.2	18.3	6	25	16	20	18	37	5.7	9.3	99	118	0.7	1.4	97	217	134	140	3.2	5.7	1
1	0	2	6	13	6	4	3	1	1	0	0	0	0	0	0	0	0	0	0	0	3	88	31.5	34.9	9.9	11.2	145	171	28.3	33.5	14	20	21	27	13	17	8.5	9.1	91	94	1.5	2	113	147	132	135	3.9	4.7	2.8
0	1	1	4	14	6	4	4	0	0	0	0	0	0	0	0	0	0	0	0	0	4	65	20	22.1	6.4	7.4	49	130	46.2	222.9	12	16	21	23	35	54	7.9	8.6	104	106	1.2	1.6	109	149	140	144	2.9	4.2	0.9
0	1	1	2	15	6	5	4	0	0	0	0	0	1	0	0	0	0	0	1	0	4	22	37.5	52.1	12.7	18.1	108	158	16.5	32.8	7	30	12	30	21	25	6.7	7.7	97	113	1.7	2.9	80	468	137	144	3.6	6.9	1.1
0	1	1	10	3	1	1	1	0	1	0	0	0	0	0	0	0	0	0	0	0	5	46	24	24.4	8.2	8.4	66	92	8.7	9.4	10	11	15	15	24	28	7	8.1	124	125	0.6	0.8	100	116	146	147	3.3	3.9	0.6
1	1	1	3	13	6	4	3	0	0	0	0	0	0	0	0	0	0	0	0	0	5	70	36.3	39.4	12.8	12.8	146	160	7.2	13.4	13	18	22	23	13	17	7.8	8.9	103	105	0.9	1.1	115	119	140	143	3.7	4.3	1.2
0	0	1	9	3	1	1	1	0	0	0	0	0	0	0	0	0	0	0	0	0	4	64	31.7	33.9	10.6	11.1	100	137	7.5	7.8	11	11	23	25	25	25	9.3	9	106	111	0.9	1	78	78	137	140	4.9	5.2	1.3
0	1	1	2	13	6	4	3	0	1	0	0	0	1	0	0	0	0	0	0	0	4	82	32	32.2	10.1	10.1	161	172	6.1	7.5	8	15	31	37	21	24	7.5	8.8	95	105	1	1.2	133	477	132	147	3.7	4.1	0.3
0	0	1	2	12	6	4	2	0	0	0	0	0	0	0	0	0	0	0	0	0	4	75	34	34	11.5	11.5	245	245	10.4	10.4	16	16	26	26	10	10	8.6	8.6	104	104	0.6	0.6	101	101	139	139	6.6	6.6	1.8
0	1	1	3	15	5	0	1	2	1	0	0	0	0	0	0	0	0	0	0	0	2	67	26.6	28.8	9.5	10	126	146	6	8.3	10	10	24	25	17	18	8	8.9	105	107	1	1	163	167	136	136	4.4	4.7	1.2
0	1	1	4	11	5	2	4	2	0	0	0	0	1	0	0	0	0	0	0	0	2	55	35.1	35.1	10.7	10.7	208	208	17.2	17.2	10	10	26	26	18	18	7.4	7.4	105	105	0.8	0.8	99	99	137	137	4	4	0.7
0	1	1	11	10	4	2	4	1	0	0	0	0	0	0	0	0	0	0	0	0	6	90	23.4	27.6	7.8	9.2	146	218	12.7	16.3	15	19	21	25	39	49	7.7	8	102	104	2	2.4	136	151	134	141	4	4.6	2.6
0	1	1	5	14	6	5	3	1	1	0	0	0	0	0	0	0	0	0	0	0	3	51	30.6	33.6	9.3	10.4	100	126	4.2	10.5	14	16	21	24	9	10	8.1	8.1	106	108	0.6	0.6	122	167	139	143	4	4.5	2.2
0	1	1	3	10	6	1	3	0	0	0	0	1	0	0	0	0	0	0	0	0	3	57	50.3	60.2	16.9	18.8	118	166	11	15.9	10	24	20	32	10	21	8.7	8.8	99	101	0.7	1	79	160	137	140	3.7	4.6	1.1
0	0	1	3	11	6	1	4	0	0	0	0	0	0	0	0	0	0	0	0	0	6	77	23.5	29.6	7.2	8.4	355	506	19.9	26	18	28	16	25	46	50	7.7	8.6	82	86	1.5	1.7	88	245	125	130	4.3	6.8	1.6
0	1	1	2	14	6	5	3	0	0	0	0	0	0	0	0	0	0	0	0	0	2	79	20.1	24.4	6.5	7.9	227	320	40.9	49.3	21	23	11	16	43	48	8.4	8.5	96	101	4.2	5.9	88	133	135	136	4.5	5.6	1.2
0	1	1	4	13	6	4	3	3	0	0	0	0	0	0	0	0	0	0	0	0	4	65	27.2	30.9	9.7	11.1	142	184	12.3	13.6	11	10	24	25	10	13	8.2	8.6	110	115	0.8	0.8	92	97	140	140	3.9	4	1.5
0	1	4	4	6	4	1	1	0	1	0	0	0	0	0	0	0	0	0	0	0	23	64	39.8	40.3	12.4	12.5	213	255	10.3	11.3	17	19	21	24	5	12	8	8.4	100	103	0.9	1.4	105	116	136	140	4.1	5.1	1.2
0	0	3	2	13	6	4	3	0	0	0	0	0	0	0	0	0	0	0	0	0	7	65	33	42.9	10.9	14.2	208	252	6.8	13.1	11	18	23	25	12	16	7.9	9.5	98	111	0.9	0.9	129	223	136	142	3.6	4.6	1.1
0	1	1	6	15	6	5	4	1	0	0	0	0	0	0	0	0	0	0	0	0	3	67	30.1	34.7	10.3	12.2	120	165	15	20.5	10	10	22	23	23	26	7.1	7.3	113	116	0.9	1.1	142	142	141	141	4.4	4.4	0.8
0	1	1	2	8	5	1	2	0	0	0	0	0	0	0	0	0	0	0	0	0	5	80	31.2	32.8	10.9	11.5	231	242	4.9	6.5	18	19	21	22	17	18	8.9	8.9	101	103	1.2	1.2	114	116	137	139	3.5	3.9	1.3
0	1	4	5	15	1	0	1	0	0	0	0	0	0	0	0	0	0	0	0	0	3	64	21.8	30.4	7.5	10.4	75	143	8.1	24.3	11	16	18	18	15	19	8.5	8.6	108	116	0.8	1.1	129	133	137	141	3.9	4.8	1.4
0	1	1	2	15	6	5	4	0	1	0	0	0	0	0	0	0	0	0	0	0	4	46	40.4	40.7	14.6	14.7	218	255	11.1	11.2	13	14	23	25	12	15	7.7	8.1	103	105	0.8	0.9	139	163	137	137	4.2	4.5	0.9
0	0	1	3	14	6	5	3	0	0	0	0	0	0	0	0	0	0	0	0	0	2	36	28.3	28.5	8.9	9.2	791	847	31.9	32	13	13	24	25	5	5	7.2	7.5	103	103	0.6	0.6	121	133	136	137	3.7	4.3	0.7
0	0	1	5	4	2	1	1	0	0	0	0	0	0	0	0	0	0	0	0	0	5	73	14.4	26.2	4.8	9	133	188	13.6	21.1	15	17	12	14	27	28	7.4	7.8	110	113	1.6	1.8	175	294	140	140	4.2	5.1	1.2
0	1	1	7	14	6	5	3	2	1	0	0	0	0	0	0	0	0	0	0	0	13	51	29.9	41.5	10.4	14	121	248	11.7	15.8	14	25	15	21	21	27	7	8.1	103	108	1.4	1.7	102	145	137	143	3.9	6.3	3
1	1	4	4	14	6	5	3	0	0	0	0	0	0	0	0	0	0	0	0	0	5	54	35.3	35.3	12	12	69	69	22.9	22.9	16	16	24	24	19	19	10.2	10.2	93	93	0.7	0.7	80	80	128	128	4.7	4.7	2.2
0	0	4	4	14	6	5	3	0	1	0	0	0	0	0	0	0	0	0	0	0	2	48	25.5	25.5	8.5	8.5	287	287	2.8	2.8	11	18	24	29	11	19	6	8.2	81	96	0.5	0.8	132	193	128	133	2.6	5.5	2
0	1	4	11	13	6	4	3	0	1	0	0	0	1	0	0	0	0	0	1	0	7	68	36.8	48.4	12.4	15.4	34	97	3.1	14.8	20	26	10	16	20	31	7.7	8.9	97	104	1.3	2.4	277	407	135	140	3.7	4.9	6.3
0	0	4	6	7	5	1	1	0	0	0	0	0	0	0	0	0	0	0	0	0	21	68	37.5	45.2	13	15.5	176	239	18.7	22.4	13	19	15	23	14	14	6.9	8.2	107	112	0.6	0.8	153	236	135	145	3.7	5.5	3.4
0	1	1	7	13	5	4	4	0	1	0	0	0	1	0	0	0	0	0	0	0	2	75	28.4	30.5	9.3	10.2	159	251	14.7	18.4	13	27	22	29	33	61	8	10.5	86	102	2	2.9	198	928	130	140	3.7	4.7	1.7
0	1	2	4	14	6	5	3	0	1	0	0	0	1	0	0	0	0	0	0	0	10	68	9.1	24.9	3.3	7.7	117	340	9.6	21	12	28	9	20	28	36	6.1	7.4	104	110	0.9	1.4	112	333	138	140	4	7.5	2
0	1	1	6	14	5	5	3	1	0	0	0	0	0	0	0	0	0	0	0	0	5	66	29.6	33.3	9.9	11.3	246	259	8.1	13.8	14	22	18	27	48	61	7.4	8.2	102	109	2.3	3.2	166	260	136	142	4.3	7.4	1.9
1	1	1	4	3	1	1	1	0	0	0	0	0	1	0	0	0	0	0	0	0	8	61	39.6	40.5	12.4	12.7	80	128	17.8	18.7	16	23	7	17	39	42	8.7	9.1	99	102	1.5	1.8	171	521	126	129	3.3	5.1	2
0	0	1	2	15	6	5	4	0	2	0	0	0	1	0	0	0	0	0	0	0	2	39	20.5	29.4	6.4	8.9	698	972	14.9	23.7	12	14	22	24	12	12	8.2	8.6	98	102	0.6	0.7	93	100	136	136	4.6	4.8	1.5
0	0	2	5	14	6	5	3	2	1	0	1	0	0	0	0	0	0	0	0	0	5	56	21.3	24.2	6.8	7.7	473	520	6	7.8	13	13	20	20	9	9	7.4	7.4	106	106	0.7	0.7	101	101	139	139	4.5	4.5	2.5
0	1	1	3	7	4	2	1	0	0	0	0	0	0	0	0	0	0	0	0	0	2	57	40	42.2	13.4	13.8	241	285	11.9	18.8	14	18	20	27	17	19	7.9	8.4	104	106	0.9	1	73	105	140	142	3.9	4	0.7
0	0	1	4	12	5	4	3	1	0	0	0	0	0	0	0	0	0	0	0	0	4	83	26.9	28.6	8.8	9.9	377	502	18.4	24.2	15	17	21	28	59	79	7.6	7.6	93	103	2.5	3.7	83	118	132	138	3.7	4	1.2
0	0	1	2	15	6	5	4	0	0	0	0	0	0	0	0	0	0	0	0	0	2	55	26.8	27.8	9.4	9.6	139	184	6.8	8.6	12	15	22	27	9	9	7.8	8.1	99	102	0.3	0.5	115	157	134	135	3.6	4.2	1.9
0	1	4	2	14	6	5	3	0	1	0	1	0	0	0	0	0	0	0	0	0	2	95	41.7	50.2	14.3	17.3	107	147	4.6	7.6	14	21	19	20	33	41	7.7	9.2	103	110	1.2	1.9	78	106	138	140	4.1	5.2	1.2
0	1	4	11	3	1	1	1	2	0	0	0	0	0	0	0	0	0	0	0	0	2	57	34.2	38.9	11.5	12.6	75	160	12.7	22.6	10	10	23	23	16	17	7.8	8.6	103	109	0.8	0.9	162	162	136	136	5	5.6	1.3
0	1	4	3	14	6	4	4	1	0	0	0	0	1	1	0	0	0	0	0	0	3	66	30	32.9	10.5	10.7	89	93	4.6	4.7	11	17	10	12	54	79	8.1	8.5	122	125	2.2	3.7	82	131	142	144	4.8	6.2	0.7
1	1	4	6	14	6	5	3	0	0	0	0	0	0	0	0	0	0	0	0	0	2	79	32.9	42.3	10.6	13.8	91	130	7	8.7	22	27	14	18	62	64	7.3	7.7	97	103	5.2	6.1	87	190	136	139	4.1	4.2	5.8
0	0	2	2	15	6	0	3	0	1	0	0	0	0	0	0	0	0	0	0	0	3	90	27.3	29.1	8.6	8.8	100	117	5.6	8.9	13	14	23	24	15	15	7.4	8.3	108	110	0.7	0.7	96	147	141	143	3.6	4.1	1.3
0	1	1	4	13	6	4	3	2	0	0	0	0	0	0	0	0	0	0	0	0	10	48	27	33.4	9.7	12.3	56	142	4.6	11.7	7	11	23	25	11	15	8.3	10.4	109	112	0.6	0.7	165	195	138	142	4.4	6.2	1.5
0	1	1	2	7	4	1	2	0	1	0	0	0	0	0	0	0	0	0	0	0	5	92	26.3	29.3	8.7	9.9	268	309	8.2	19.2	9	16	19	21	23	24	8.4	8.8	104	108	1.4	1.6	161	163	133	134	4.7	5.2	1.1
0	1	1	3	10	6	1	3	0	0	0	0	0	0	0	0	0	0	0	0	0	5	74	25.7	25.7	7.8	7.8	256	256	5.9	5.9	15	15	25	25	45	50	8.4	8.5	97	98	1.6	1.7	130	159	137	138	3.8	4.3	0.8
0	0	1	2	8	4	1	3	0	0	0	0	0	0	0	0	0	0	0	0	0	7	83	24.5	36.5	8.8	13	77	145	18.4	19.7	9	10	20	22	8	8	8.2	8	106	109	0.4	0.5	108	108	133	135	4	4.1	1.6
0	1	1	3	15	6	5	4	1	0	0	0	0	0	0	0	0	0	0	0	0	2	72	39.4	48.5	13.2	16.6	182	227	8.8	18.9	12	20	20	23	23	28	8.9	9	104	107	0.9	1.3	112	137	140	144	4	4.4	2.4
0	1	3	2	10	5	1	4	0	0	0	0	0	0	0	0	0	0	0	0	0	14	69	30.3	37.8	10.3	12.9	146	183	7.9	9.7	12	13	21	27	9	13	7.5	9.3	98	109	0.7	0.9	118	310	134	138	3.5	3.8	1
0	0	1	3	7	5	1	1	0	1	0	0	0	0	0	0	0	0	0	1	0	4	74	37.1	41.3	11.4	12.8	219	240	7.1	9	14	17	21	25	11	12	7.8	8.1	107	117	0.8	0.8	193	251	145	148	2.7	4.4	1.3
0	0	1	4	10	6	1	3	0	1	0	0	0	0	0	0	0	0	0	0	0	3	79	31.1	36.6	9.5	11.2	199	255	5.6	9	10	16	38	40	49	54	9	10	98	103	2.4	2.7	107	119	145	149	3.9	6.8	0.7
0	0	1	2	9	5	2	2	0	0	0	0	0	0	0	0	0	0	0	0	0	4	27	11	40.6	3.2	12.7	93	362	5.1	15.4	11	11	27	27	7	11	7.4	7.5	106	108	0.5	0.9	98	128	140	142	3.6	3.9	1.8
0	1	4	2	3	1	1	1	0	0	0	0	0	0	0	0	0	0	0	0	0	3	18	24.4	32.7	7.8	10.6	147	294	15.9	28.2	10	13	20	24	12	14	7.1	8	116	120	1	1.2	127	175	143	148	4	6.1	1.9
1	0	1	5	10	5	2	3	0	0	0	0	0	0	0	0	0	0	0	0	0	2	77	24.5	32.1	8.2	10.1	51	58	2.6	3.1	13	17	17	21	47	51	7.8	8.6	99	106	1.2	1.3	79	94	127	134	3.7	5.2	2
1	1	4	3	15	5	0	2	0	0	0	0	0	0	0	0	0	0	0	0	0	11	69	36.1	43.4	12.1	14.9	95	122	5.6	6.4	9	17	20	23	24	36	7.4	7.6	99	109	0.9	1.2	124	205	136	141	3.9	4.8	1.1
1	1	1	10	8	5	1	2	2	0	0	0	0	0	0	0	0	0	0	0	0	9	67	17.4	29	6.1	10.1	12	78	5.3	6.5	14	19	19	25	74	91	6.6	8.1	104	109	4.9	6.2	102	149	139	142	4.2	4.6	1.8
0	1	4	8	12	5	4	2	0	0	0	0	0	0	0	0	0	0	0	0	0	6	72	23.4	27.5	7.7	8.6	82	91	9.5	10.7	20	23	14	16	84	92	7.1	7.8	99	101	6.8	7.8	115	151	136	137	5	5.8	1.1
0	0	1	10	3	1	1	1	1	1	0	1	0	1	0	0	0	0	0	0	0	11	59	35.6	38.4	11.1	11.6	157	300	16.9	20	14	20	17	24	28	38	5.4	6.9	90	98	2	2.5	107	343	120	128	4.8	6.5	2.2
0	1	2	5	8	5	2	1	0	0	0	1	0	0	0	0	0	0	0	0	0	3	92	27.1	27.2	9.6	10	68	68	3.9	4.5	14	16	20	20	10	10	7.8	7.9	96	99	0.9	1	71	78	125	130	4.5	4.5	0.8
0	0	1	2	14	6	4	4	0	1	0	0	0	0	0	0	0	0	0	0	0	5	49	32.4	34.1	11.1	12	133	136	5.8	6	11	14	22	23	8	12	8	8.5	103	105	0.1	0.2	116	139	135	136	2.6	4.4	0.8
0	1	1	3	14	6	5	3	0	1	0	0	0	0	0	0	0	0	0	0	0	4	57	23.3	34.8	7.8	11.9	69	137	10.4	18.2	16	17	20	26	16	18	8.5	8.5	108	115	0.7	1.2	161	204	141	144	3.9	4.7	2.4
0	0	4	2	15	6	5	4	0	0	0	0	0	0	0	0	0	0	0	0	0	3	90	42.1	46.5	13.6	14.5	319	381	9.2	14.7	16	18	22	24	13	14	8.2	8.9	104	105	0.9	1.1	107	126	141	141	3.4	4.1	1.8
0	1	1	2	13	6	4	3	0	0	0	0	0	0	0	0	0	0	0	0	0	3	68	32.2	35.6	11.6	12.1	119	163	2	5.2	14	16	24	27	18	24	9.3	9.6	101	104	0.5	0.6	121	149	139	140	3.4	4.4	3.1
0	0	3	8	3	1	1	1	1	1	0	0	0	0	0	0	0	0	0	0	0	3	77	25.5	33.4	8.5	10.5	177	201	8.1	10	13	15	22	22	45	47	8.1	8.1	106	110	1.8	2.1	119	147	138	140	4.2	5.1	1
0	0	1	5	14	6	5	3	0	0	0	0	0	0	0	0	0	0	0	0	0	4	83	26.2	31.3	8.2	9.1	436	598	12.9	20	16	19	21	23	14	15	9.2	9.5	106	107	4.6	5.3	81	97	142	142	3.9	5	1.2
0	0	1	6	3	1	1	1	1	1	0	0	0	0	0	0	0	0	0	0	0	2	85	31.9	39.1	10.4	11.7	166	197	16	16	12	14	22	24	17	17	7.2	8	108	116	0.7	0.8	118	118	141	146	4	4.7	1
0	0	1	2	15	6	5	4	0	0	0	0	0	0	0	0	0	0	0	0	0	2	59	37.9	37.9	12.4	12.4	124	124	9	9	13	13	27	27	14	14	8.6	8.6	108	108	0.8	0.8	130	130	143	143	4.5	4.5	2.4
0	0	1	9	3	1	1	1	0	0	0	0	0	0	0	0	0	0	0	0	0	12	73	19.1	23.2	6.6	8.1	50	71	13.2	18.2	21	26	15	19	40	44	7.2	7.7	107	108	1.9	2	133	170	142	143	4.8	5.9	2.9
0	0	1	3	14	6	5	3	1	0	0	0	0	0	0	0	0	0	0	0	0	2	46	25.7	32.7	8.7	10.1	109	138	9.1	13.5	9	13	20	20	7	8	7.7	7.7	105	115	0.3	0.5	163	163	134	141	3.3	4.3	0.9
0	0	4	4	3	1	1	1	3	1	0	0	0	1	0	0	0	0	0	0	0	10	58	25.7	27.9	8.4	9	211	222	3.8	5.9	14	16	34	35	12	19	7.9	8.1	99	99	0.8	0.8	81	102	147	149	3.4	4.6	1
0	1	1	7	7	4	1	2	0	0	1	0	0	0	0	0	0	0	0	0	0	2	86	42	42	13.3	13.3	281	281	7.7	7.7	15	19	26	30	24	28	7.4	8.7	102	108	1	1.3	114	203	143	149	3.7	5.9	1.2
0	0	1	2	12	5	4	3	0	0	0	0	0	0	0	0	0	0	0	1	0	20	56	22.8	30.4	7.9	9.9	182	251	9.8	14.3	13	22	12	19	17	18	6.8	7.6	93	103	0.6	0.7	91	275	128	132	3.4	4.9	0.9
1	1	4	8	15	1	0	1	0	1	0	0	0	1	0	0	0	0	0	0	0	4	28	41.2	50.6	14.8	16.4	119	254	8.3	30.7	16	26	12	19	15	27	6.9	8	110	115	1.8	2.1	93	328	143	150	1.8	3.5	4.2
0	1	1	2	14	6	4	4	0	0	0	0	0	0	0	0	0	0	0	0	0	3	63	15.6	23.3	5.3	7.6	153	181	7.9	9.8	23	25	13	17	94	94	8	8	108	108	3.2	3.3	162	173	141	144	4.4	4.8	2.7
1	1	1	2	3	1	1	1	2	0	0	0	0	1	0	0	0	0	0	0	0	2	73	43.5	46.6	15.3	16.1	134	140	14.8	15	15	17	22	22	21	22	8.5	8.8	103	104	1	1.1	114	124	137	138	3.6	4.1	1.8
0	0	1	4	15	6	5	4	0	0	0	0	0	0	0	0	0	0	0	0	0	2	50	19.7	43.2	6.6	15.3	105	268	10.8	28.4	9	18	20	24	9	14	6.6	8.3	104	112	0.5	1.3	116	369	137	141	3.7	4.7	1.5
0	1	4	4	13	6	4	3	0	0	0	0	0	0	0	0	0	0	0	0	0	7	49	35.3	40.1	11.7	13.2	163	182	14.9	17.2	13	15	20	22	10	11	7.9	7.9	105	106	1.1	1.3	116	116	139	139	4	4.9	0.9
0	1	1	2	13	6	4	3	0	0	0	0	0	0	0	0	0	0	0	0	0	2	55	20.6	26	6.8	8.6	41	54	4.9	9.3	19	25	15	19	45	50	8.9	9	104	110	3.3	3.6	130	197	140	145	3.3	3.6	4.4
0	0	1	3	15	6	5	4	3	0	0	0	0	0	0	0	0	0	0	0	0	2	87	22.5	29.7	7.2	9.7	98	109	5.9	12.5	14	15	20	20	14	19	7.8	9.2	107	113	0.9	1.3	123	123	137	143	3.7	5.3	0.9
1	0	1	2	6	4	1	1	0	0	0	0	0	0	0	0	0	0	0	0	0	41	79	34.6	37	11.1	12.5	254	271	9.8	11.7	17	18	19	20	24	26	8.8	8.8	106	106	1.5	1.7	182	213	138	139	4.3	4.5	2
0	1	1	11	3	1	1	1	0	1	0	0	0	0	0	0	0	0	0	0	0	2	73	33.8	39	11.7	13.7	116	135	10.5	12.1	12	15	20	20	25	28	8.2	8.5	108	111	1	1.4	152	177	138	138	4.6	4.6	2.1
0	1	1	3	11	5	4	2	0	1	0	0	0	0	0	0	0	0	0	0	0	2	74	23.7	26.5	8.1	9	100	146	11.7	16.3	18	20	19	21	61	75	9.1	9.2	102	106	1.4	1.5	280	337	135	140	4.5	5.5	2.8
0	1	1	3	10	5	1	4	0	1	0	0	0	0	0	0	0	0	0	0	0	2	52	32.8	42.3	10.7	13.7	202	233	8.6	28.3	7	20	20	26	9	14	7.4	9	96	101	0.8	1.1	123	185	130	134	3.8	5.8	1.2
0	1	4	2	13	6	4	3	0	1	0	0	0	0	0	0	0	0	0	0	0	5	82	21.1	24.8	6.6	7.9	371	434	20.5	27.1	19	30	11	18	25	44	7.8	9.1	96	100	1.7	2.5	99	431	135	141	4.6	6.4	2.4
0	1	1	2	14	6	5	3	0	0	0	0	0	0	0	0	0	0	0	0	0	3	79	34.2	35.6	12.3	12.6	144	157	11.3	11.9	12	16	22	23	37	38	7.8	8.5	108	108	1.7	2	155	168	138	141	4.8	4.8	1.3
0	0	1	7	9	5	1	3	0	0	0	0	0	0	0	0	0	0	0	0	0	3	55	27.4	37.1	9.1	11.5	116	138	10.3	15.5	9	10	23	26	9	13	8.3	8.6	104	113	0.5	0.6	129	130	135	142	4.2	4.5	1
1	1	4	5	14	6	5	3	0	0	0	0	0	0	0	0	0	0	0	0	0	2	82	33.3	37.3	10.7	11.7	99	124	8.7	12.8	23	30	10	16	45	68	8.5	8.9	106	109	3	3.4	91	104	141	144	4.2	4.6	3.8
0	1	1	2	14	6	5	3	0	0	0	0	0	0	0	0	0	0	0	0	0	3	58	33	44.1	11.4	15.4	249	351	21.3	27.5	14	22	19	23	17	23	7	7.3	96	105	1	1.8	90	100	135	138	4.2	4.7	1.6
1	1	1	4	11	5	2	4	0	0	0	0	0	0	0	0	0	0	0	0	0	2	87	28.5	30.1	8.5	9.4	153	166	36.2	49.5	14	18	15	17	128	130	8.6	8.9	106	107	3.8	4.2	102	141	131	135	5.7	6.9	1.2
0	1	4	6	13	4	5	4	0	0	0	0	0	0	0	0	0	0	0	0	0	3	80	25.7	28.2	8.7	9.2	138	181	7.5	10.9	11	15	31	33	43	56	8.8	9.3	96	99	1.5	2	98	125	138	140	3.2	4.2	0.6
0	0	1	2	15	6	5	4	1	0	0	0	0	0	0	0	0	0	0	0	0	2	65	26.5	32.3	8.7	10.8	117	183	8.1	15.8	14	14	21	21	12	18	8.4	8.5	106	111	0.7	0.8	122	122	137	142	4	4.2	1.4
0	1	1	3	5	1	1	3	0	0	0	0	0	0	0	0	0	0	0	0	0	10	62	24.5	31.5	8.3	10	91	164	4	6.4	15	38	10	22	18	20	8.5	8.7	94	104	0.9	1.4	111	158	133	137	4.2	5	2.1
0	1	2	5	3	1	1	1	0	1	0	0	0	0	0	0	0	0	0	0	1	9	49	37.3	40.1	12.3	12.6	274	314	5.4	10.9	20	24	19	21	53	59	8.3	8.5	104	105	6.9	7.4	139	164	142	143	3.9	5	0.9
0	1	1	6	7	5	1	1	1	2	0	0	0	1	0	0	0	0	0	0	0	14	53	35.6	44.5	12	15.9	99	153	10.3	19.3	13	17	17	22	21	33	5.7	7.3	100	108	1.8	3.7	69	248	133	138	3	3.6	1.1
0	1	1	4	14	6	4	4	1	0	0	0	0	0	0	0	0	0	0	0	0	4	78	32.1	39.7	11.2	12	140	149	9.1	11.9	8	10	23	25	28	28	8.4	8.4	108	111	1.2	1.3	99	133	136	140	4.7	6.1	0.8
0	1	1	2	13	6	4	3	0	0	0	0	0	0	0	0	0	0	0	0	0	3	69	31.9	38.6	10.5	12.8	164	216	4.4	8.1	13	18	21	24	7	10	8.1	8.2	93	99	0.9	0.9	89	133	132	136	4.1	5.6	1.4
0	1	4	3	9	6	1	2	0	0	0	0	0	0	0	0	0	0	0	0	0	25	59	40.9	47.4	14.4	16.4	160	173	13.4	15.1	16	18	21	23	13	17	9	9	99	100	0.7	0.9	203	226	138	139	4	4.1	3.4
0	1	1	3	14	6	5	3	0	0	0	0	0	0	0	0	0	0	0	0	0	6	61	24.3	27	8.4	9.3	178	189	13.1	14.2	12	13	28	29	32	37	7.8	7.9	97	97	1.7	2.3	170	176	134	134	4.2	4.3	0.8
0	1	4	5	15	6	5	4	0	0	0	0	0	0	0	0	0	0	0	0	0	4	63	41.5	42.1	13.8	14.3	106	122	4.9	5	10	13	25	28	21	24	9.3	9.3	104	106	1	1.3	100	127	137	141	3.7	4.5	1.6
1	0	4	2	5	1	1	3	2	0	0	0	0	0	0	0	0	0	0	0	0	20	72	33.4	41.8	10.7	13.7	181	230	13.5	14.8	11	17	19	22	10	22	7.6	8.2	106	110	0.5	0.9	131	148	139	141	3.6	4.3	1.4
0	0	1	2	14	6	5	3	1	0	0	0	0	0	0	0	0	0	0	0	0	4	74	24.7	35.1	8.4	12.1	117	168	10.9	17.1	13	16	19	21	16	19	8.1	7.9	109	110	0.7	0.7	100	100	137	140	4.3	4.6	1.8
0	1	4	4	8	5	2	1	0	0	0	0	0	0	0	0	0	0	0	0	0	12	19	41.9	41.9	14.8	14.8	247	247	16.8	16.8	15	15	28	28	11	11	9	9	99	112	1	1	111	137	138	145	3.7	4.1	1.6
0	1	1	3	14	6	4	4	0	0	0	0	0	0	0	0	0	1	0	0	0	11	72	24.1	26.2	8.2	8.9	18	38	1.1	10.4	12	16	20	24	17	29	7.8	9.1	102	106	0.9	1.5	108	147	135	142	3.4	5.8	2.3
0	0	4	4	9	5	1	3	1	0	0	0	0	0	0	0	0	0	0	0	0	3	78	29.9	33.9	9.4	10.4	181	190	7.2	8.8	10	16	34	36	58	65	9.2	9.4	93	100	1.4	1.6	48	283	138	144	3.4	4.9	0.9
0	0	1	2	9	6	1	2	1	0	0	0	0	0	0	0	0	0	0	0	0	6	86	30.5	31.6	10.1	10.3	223	241	16.8	36.5	14	18	19	22	35	41	7.5	8.3	107	110	1.6	2.1	102	171	139	141	4.3	4.5	1.1
1	1	4	2	15	6	5	4	0	0	0	0	0	0	0	0	0	0	0	0	0	3	47	21.5	26.8	7.2	8.6	96	107	4.7	4.7	15	17	25	30	19	23	8.4	8.4	97	97	0.5	0.6	114	125	134	138	4.3	5.3	2.9
0	1	1	3	13	6	4	3	0	0	0	0	0	0	0	0	0	0	0	0	0	5	68	24.1	30.6	8.5	11.1	72	117	5.3	9.3	10	10	25	25	21	27	8.4	8.4	109	112	1.1	1.1	114	114	140	143	3.8	4.2	1.3
1	1	4	11	15	1	0	1	0	0	0	0	0	0	0	0	0	0	0	0	0	4	68	26.8	28.3	8.4	8.4	70	105	7.9	10.5	16	20	26	30	64	73	8.2	8.7	98	101	2.4	2.6	107	144	145	147	3.7	4.6	3.7
0	1	1	2	14	5	5	4	0	0	0	0	0	0	0	0	0	0	0	0	0	2	21	39.8	40.1	14.2	14.2	196	199	9	11.7	13	17	19	23	8	12	8.3	9.1	107	109	1.1	1.2	103	105	138	142	3.8	4.7	1
0	0	1	2	14	6	4	4	0	0	0	0	0	1	0	0	0	0	0	0	0	5	54	29.6	41	11.2	12.8	461	716	15	22	19	26	15	20	73	103	8.2	8.7	94	100	0.9	1.8	105	163	130	135	4.1	4.7	2.7
0	0	4	7	11	5	2	4	0	0	0	0	0	1	0	0	0	0	0	0	0	5	40	29	39.1	10	12.5	61	126	15.4	38.2	14	27	5	15	13	35	6.1	7.8	106	125	0.6	1.1	132	568	134	141	2.1	4.5	0.7
0	0	4	2	14	6	4	4	0	0	0	0	0	0	0	0	0	0	0	0	0	2	75	35.4	39.5	11.2	12.4	145	149	5.4	6.7	14	14	19	21	9	12	7.4	7.8	108	112	0.7	0.9	75	111	142	145	3.8	4.3	1.4
0	1	4	4	9	5	1	3	2	0	0	0	0	0	0	0	0	0	0	0	0	8	58	20.5	30.8	7.3	11	83	209	5.5	9.1	11	11	23	23	28	32	8.5	9.8	111	112	1.8	2.4	96	96	142	142	4.3	4.7	3.1
0	1	1	2	15	6	5	4	0	0	0	0	0	0	0	0	0	0	0	0	0	2	87	23	26.1	7.7	9.2	506	553	13.9	15	15	17	21	21	39	43	7.9	8.2	101	103	1.4	1.6	119	125	133	135	3.9	4.1	1.2
1	0	1	7	3	1	1	1	0	0	0	0	0	1	0	0	0	0	0	0	0	15	86	30.4	32.9	9.3	9.8	496	579	14.7	20.8	20	25	11	19	109	136	7	8.8	98	107	3	4.2	180	464	134	138	3.5	4.5	3.2
0	1	1	5	15	6	5	4	1	2	0	0	0	1	0	0	0	0	0	0	0	2	42	33.1	36.7	10.5	11.4	107	149	5.7	11.3	11	16	20	25	10	13	8.3	8.6	102	104	0.9	1.1	92	126	134	135	3.7	4.1	2
1	0	4	2	15	6	0	3	1	0	1	0	0	0	0	0	0	0	0	0	0	5	78	32.8	40.2	10	13.1	279	483	13	16.8	13	16	15	21	19	22	7.6	8	111	113	1.1	1.5	162	233	138	143	4.2	4.4	4.9
0	1	1	3	13	5	4	4	1	0	0	0	0	0	0	0	0	0	0	0	0	2	55	28.6	31.2	9.2	10.2	81	93	7.1	8.2	11	11	18	25	5	12	7.1	7.9	109	121	0.8	1.1	108	168	141	147	3.2	3.8	0.9
1	0	2	3	3	1	1	1	1	0	1	0	0	1	1	0	0	0	0	0	0	19	87	20.3	34.5	6.4	11.2	161	221	10.9	15.7	18	20	15	20	109	123	8	8.1	105	107	2.6	2.9	70	127	138	141	3.4	3.8	1.3
1	1	1	4	8	4	1	3	0	0	0	0	0	0	0	0	0	0	0	0	0	2	94	26	30.3	8.6	10.2	175	194	16.8	23.7	14	17	19	21	43	44	7.7	8	110	112	1.6	1.8	94	139	146	148	3.4	4.2	1.8
0	1	2	6	3	1	1	1	1	0	0	0	0	0	0	0	0	0	0	0	0	10	35	31.5	33.2	11.3	12.1	185	197	6.9	7.5	16	19	19	24	27	37	6.3	7.4	93	97	4.1	5.1	90	113	125	131	4.8	6.1	1
0	1	4	5	15	6	5	4	1	0	0	0	0	0	0	0	0	0	0	0	0	2	59	32.8	39.5	11.2	13.8	180	261	13.6	21.1	7	15	23	25	10	11	8	8	106	110	0.7	0.9	128	128	138	140	3.6	4	0.8
0	1	4	2	14	6	5	3	0	0	0	0	0	0	0	0	0	0	0	0	0	2	20	33.6	40.5	11.4	13.1	153	181	7.7	11.8	11	17	22	25	7	7	7.5	8.1	104	110	0.6	0.7	84	200	139	143	3.3	3.8	1.1
0	1	1	3	13	6	4	3	0	1	0	1	0	1	0	0	0	0	0	0	0	2	65	33	35.3	11.9	12.6	315	374	11.7	15.4	12	22	16	22	24	31	7.5	8.3	96	106	1.2	1.4	111	594	131	136	2.9	4.5	1.5
0	1	1	3	13	6	4	3	1	2	0	0	0	0	0	0	0	0	0	0	0	21	67	20.5	33	6.6	10.3	162	390	6.4	18.5	19	32	13	19	65	83	5.7	8.6	86	102	2.3	3.4	135	327	126	136	2.6	5.7	1.8
0	1	1	2	15	6	5	4	0	0	0	0	0	0	0	0	0	0	0	0	0	3	87	18.5	29.1	5.7	8	304	362	15.3	17.9	13	15	20	22	66	68	7.2	7.6	108	108	1.2	1.3	181	247	139	139	4.1	4.4	1.3
1	1	1	10	15	6	5	4	0	0	0	0	0	0	0	0	0	0	0	0	0	2	41	22.2	25.7	7.4	8.5	18	50	0.9	1.5	18	24	17	21	46	72	9	9.3	89	93	1.8	3	90	110	124	128	4.2	5.8	1.6
0	1	1	4	15	6	5	4	0	0	0	0	0	1	0	0	0	0	0	0	0	4	64	38.1	39.7	11.8	12.1	214	341	13	19.4	16	19	23	25	23	35	8.1	8.1	100	103	1.2	2	137	178	137	140	4.1	4.6	3.2
0	1	1	10	3	1	1	1	1	0	0	0	0	0	0	0	0	0	0	0	0	2	60	24.4	32.1	8.2	11.5	37	118	4.4	9.8	15	19	20	24	16	25	8	9.1	102	104	1.3	1.5	156	209	138	139	3.9	4.4	1.2
0	1	4	2	9	5	1	3	0	0	0	0	0	0	0	0	0	0	0	0	0	14	73	29.1	29.6	9.1	10.6	199	218	17.2	20.9	12	13	20	24	47	50	6.1	7.5	111	112	1.2	1.5	164	169	139	145	3.8	4.3	1.8
0	0	1	4	15	6	5	4	0	0	0	0	0	0	0	0	0	0	0	0	0	4	71	34	42.9	13.8	14	231	519	10.3	18.3	11	18	23	28	13	15	9.4	9.9	93	110	0.4	0.6	134	193	134	140	4.2	5.4	0.7
1	1	1	3	11	4	4	3	0	0	0	0	0	0	0	0	0	0	0	0	0	2	90	23	28.3	7.6	8.9	508	541	11.5	15.1	12	17	19	24	38	45	7.5	7.7	109	113	0.8	1	152	167	141	145	4	4.3	0.7
0	1	1	2	15	6	5	4	0	1	0	0	0	0	0	0	0	0	0	0	0	2	73	33	34.7	11.2	11.8	368	386	17	18.1	16	18	23	25	19	21	7.6	8.6	104	107	0.9	1	157	162	140	144	4.2	4.9	3.8
0	1	4	2	14	5	5	4	0	1	0	0	0	0	0	0	0	0	0	0	0	5	47	27.7	35.3	9.5	11.5	90	127	5.6	8.6	8	10	15	22	14	20	7	7.9	110	116	0.7	1	117	136	140	141	3.7	7.7	1.1
0	1	4	4	15	6	5	4	0	0	0	0	0	0	0	0	0	0	0	0	0	2	56	26.6	29.5	9.5	10.6	98	206	9.1	14.9	8	10	25	27	7	11	8.3	8.3	105	114	0.7	0.8	133	133	138	144	3.9	4.6	1.6
0	1	4	2	14	6	5	3	0	1	0	0	0	0	0	0	0	0	0	0	0	3	31	33.7	38.4	11.7	14.2	120	156	16	22.5	16	18	21	24	12	16	8.8	8.8	101	101	0.9	1	127	164	136	138	3.4	4.1	3.2
0	1	4	3	8	5	1	2	0	0	0	0	0	0	0	0	0	0	0	0	0	5	64	33.4	34.5	11.5	11.9	157	178	6.1	9	16	18	30	30	19	22	9.4	9.7	91	94	1	1.1	172	172	136	138	2.3	2.6	1.6
0	0	4	3	13	6	4	3	0	1	0	0	0	1	0	0	0	0	0	0	0	6	53	31.3	31.7	9.9	10.2	268	274	12.3	12.6	15	15	20	20	11	11	8.6	8.6	110	110	0.8	0.8	122	122	141	141	3.5	3.5	0.8
1	1	4	7	6	4	1	1	0	1	0	0	0	1	0	0	0	0	0	0	1	14	67	25.6	35.9	8.2	10.8	65	90	19.1	20.9	40	43	9	9	19	31	8.8	9	88	93	2.1	2.4	76	224	140	142	4.9	5.2	16
0	1	2	8	3	1	1	1	0	1	0	0	0	0	0	0	0	0	0	0	0	7	73	24	25.1	8.2	8.8	74	85	15.6	17.1	18	22	16	19	40	45	7.8	8	101	103	5.6	7	95	146	134	136	3.7	4.6	1
1	1	1	4	8	4	1	3	0	2	0	1	0	1	0	0	0	0	0	0	0	10	90	33.2	45.8	10.4	14.2	130	218	7.5	21.5	10	14	26	36	12	14	7.7	8	96	106	0.4	0.6	116	174	139	142	3.5	4.6	0.9
1	1	1	2	13	5	4	4	0	0	1	0	0	0	0	0	0	0	0	0	0	2	90	43.5	44.1	14.3	14.4	104	116	7.8	8.7	10	14	31	35	19	20	6.2	8.3	99	102	0.2	0.6	117	146	139	143	3.2	8.8	1.1
0	0	1	2	12	4	4	4	0	0	1	0	0	0	0	0	0	0	0	0	0	6	58	44.5	46.4	13.7	14.3	162	188	9.3	10.2	15	15	30	31	10	14	8.8	8.8	103	104	0.7	0.7	202	292	144	145	4	4.6	1
0	1	1	5	14	6	5	3	0	0	0	0	0	0	0	0	0	0	0	0	0	3	52	30.2	41.7	9.7	13.5	158	241	12.2	30.9	16	22	16	21	22	27	7.1	7.1	103	107	1.6	2.2	128	211	137	140	3.4	3.8	1.2
0	1	1	3	9	4	1	4	0	0	0	0	0	0	0	0	0	0	0	0	0	2	65	37.1	38.4	12.4	13.1	194	196	10.1	11.9	17	18	21	23	17	17	8.8	8.8	108	108	0.8	0.8	97	137	144	144	3.4	3.9	1.4
0	0	1	2	6	4	1	1	0	0	0	0	0	0	0	0	0	0	0	0	0	5	88	38.2	44.9	12.4	14	107	164	15.4	16.9	11	15	23	24	20	27	8.6	9	107	110	0.7	0.8	142	176	138	140	3.7	8.3	1.6
0	1	1	2	15	6	5	4	0	0	0	0	0	0	0	0	0	0	0	0	0	2	75	38.8	42.1	12.9	14.1	160	204	14	21.4	20	21	23	24	27	30	8.7	8.9	93	97	1.3	1.5	190	461	133	137	3.6	4.2	2.3
0	0	1	5	10	6	1	3	0	0	0	0	0	1	0	0	0	0	0	0	0	6	75	35.3	35.3	12.9	12.9	126	126	5.8	5.8	11	17	22	23	35	41	8.2	8.9	97	105	0.8	1.3	115	154	133	134	3.5	4.1	1.1
0	1	4	2	12	5	4	3	0	2	0	0	0	0	0	0	0	0	0	0	0	5	23	29.8	31.1	10.4	11.1	129	144	17.8	19.7	10	14	24	28	13	15	7.2	8.1	107	112	1.2	1.4	84	101	141	145	3.9	4.4	0.9
1	1	1	2	8	5	1	2	1	0	0	0	0	0	0	0	0	0	0	0	0	4	90	36.6	39.8	12.5	13.4	307	331	10	12.5	13	20	21	23	20	23	7.8	9.6	99	106	1.4	1.6	189	249	136	137	4.4	5.1	1.1
0	0	4	3	15	6	5	4	1	0	0	0	0	0	0	0	0	0	0	0	0	3	77	32.4	32.5	10.3	10.7	358	360	9.8	10.7	14	15	16	18	43	44	7.6	8.2	97	100	2.9	3.3	92	106	126	127	3.6	3.7	1.9
0	0	3	13	10	6	1	3	2	0	0	0	0	0	0	0	0	0	0	0	1	12	61	15.7	26.8	5.1	9.2	38	88	1.1	4.9	20	31	18	25	29	39	9	11.6	96	101	1.5	2.1	100	419	140	144	3.4	4.5	1.8
0	1	1	5	13	6	4	3	2	0	0	0	0	0	0	0	0	0	0	0	0	2	81	25.9	33.3	8.8	11.2	112	149	14.2	16.8	10	12	25	27	16	17	8.1	8.9	105	111	1.1	1.2	102	158	138	142	3.8	4.8	0.9
0	1	1	2	10	1	5	2	0	0	0	0	0	0	0	0	0	0	0	0	0	4	70	38.6	40.4	12.1	13.1	176	237	10.3	18.7	10	12	22	24	22	26	8.5	8.6	104	105	0.7	1	94	119	138	139	3.8	5.8	1
0	1	1	5	11	6	1	4	0	0	1	0	0	1	1	0	0	0	0	0	0	4	64	31.6	33.9	10.4	11	157	161	6.1	6.5	14	15	23	23	33	37	7.8	7.8	108	109	1.1	1.2	112	115	141	141	4.7	5	1.5
1	1	1	2	14	6	5	3	0	0	0	0	0	0	0	0	0	0	0	0	0	3	51	19	25.4	6.4	6.4	163	163	16.3	16.3	12	12	25	25	16	17	7	7	101	101	1.1	1.3	145	145	135	135	3.4	3.4	2.5
0	1	3	2	14	5	5	4	0	0	0	0	0	0	0	0	0	0	0	0	0	11	74	34.8	34.8	10.6	10.6	352	352	11.7	11.7	15	15	23	24	19	21	8.8	8.8	96	99	0.7	0.7	204	326	134	138	4.8	5	1.3
0	0	1	12	14	6	4	4	0	2	1	0	0	1	0	0	0	0	0	0	0	13	49	25.7	27.2	9	9.5	44	50	27.3	31.7	19	21	20	20	11	21	8.8	9	96	98	1.8	2.7	98	111	132	135	3.2	3.5	4.4
0	1	4	11	3	1	1	1	0	0	0	1	0	0	0	1	0	0	0	0	0	14	64	39.2	40.6	12.5	12.8	156	199	11.3	20.9	17	26	10	17	88	92	6.1	8.3	101	110	4.9	6.2	94	325	131	140	4.8	5.5	1.4
0	0	4	4	7	4	1	2	1	0	0	0	0	0	0	0	0	1	0	0	0	8	69	36.1	48.1	11.4	15.1	138	214	9.6	16.8	8	16	17	21	25	35	5.4	7.9	112	124	0.3	0.7	157	229	141	147	3.1	4.8	1.5
0	0	4	4	3	1	1	1	0	1	0	1	0	0	0	0	0	0	0	0	0	8	49	32.1	32.8	10.6	11.2	134	161	11.7	13	9	13	22	27	7	14	7.8	7.9	106	110	0.6	1.3	112	147	139	140	3.4	4.2	0.7
0	1	4	5	3	1	1	1	0	0	0	1	0	0	0	0	0	0	0	0	0	9	78	33.3	37.3	11.5	12.9	102	145	9	11	12	19	15	20	15	22	8	8.5	88	106	0.5	0.8	160	302	120	131	3.8	4.6	3.6
0	1	1	4	10	5	1	4	0	0	0	0	0	0	0	0	0	1	0	0	0	19	80	21.1	23.8	7	7.6	46	68	0.6	1	13	23	12	22	23	34	7.1	7.6	102	106	0.9	1.7	150	299	138	141	3.9	6	3.2
0	1	1	5	14	5	5	4	0	1	0	0	0	1	0	0	0	0	0	0	0	10	60	20.4	23.7	6.8	8.1	12	38	4	7.9	13	20	16	21	20	23	7.5	8.2	99	100	0.8	1.1	113	174	128	131	3.7	3.8	1.1
0	0	2	2	14	6	5	3	0	0	0	0	0	0	0	0	0	0	0	0	0	7	78	27.9	32.5	9.2	10.3	123	124	5.6	6.7	17	17	20	22	66	75	8.1	8.4	104	105	3.2	3.3	126	166	139	139	3.4	3.6	1.1
0	1	1	8	15	6	5	4	1	0	0	0	0	0	0	0	0	0	0	0	0	2	69	31.3	32	10.2	10.6	92	105	15.6	22.9	14	18	20	24	24	26	7.6	8.2	102	103	1.5	2.3	193	286	136	138	3.8	4.4	1.1
0	0	1	2	14	6	5	3	0	0	0	0	0	0	0	0	0	0	0	0	0	2	66	55.4	57.7	18.8	20	188	238	11.9	15.1	10	20	24	28	18	21	8.5	9.7	86	95	0.6	0.8	182	222	125	130	4	4.8	1
0	0	1	2	9	5	1	3	0	0	1	0	0	0	1	0	0	0	0	0	0	7	65	35.6	35.6	12.4	12.4	278	278	9.3	9.3	17	17	21	21	15	15	8.9	10.1	103	103	0.8	0.8	122	122	141	141	4.6	4.6	0.8
1	1	1	2	4	2	1	1	0	1	0	0	0	1	0	0	0	0	0	0	0	7	83	21.3	29.4	6.7	9.4	48	65	28.6	55.7	12	15	25	26	27	31	8	8.6	100	100	2.2	2.4	98	106	134	136	3.9	4.6	1
0	1	4	4	6	4	1	1	0	0	0	0	0	0	0	0	0	0	0	0	0	4	71	24.6	43.6	8.9	14.8	153	217	8.9	15.7	6	12	23	26	14	17	6.9	7.6	109	114	0.8	1	124	158	141	142	4.1	4.4	1.6
1	0	1	8	10	6	1	3	0	0	0	0	0	0	0	0	0	0	0	0	0	12	70	23.9	26	7.9	8.7	23	49	0.3	0.6	10	15	18	25	28	36	6.9	7.9	100	102	0.6	1.1	42	200	133	139	3.5	4.3	2.1
0	0	1	5	11	6	1	4	0	0	0	0	0	0	0	0	0	0	0	0	1	12	28	19	26.7	6.6	9.2	31	68	11.2	16.9	24	29	14	18	25	32	5.9	8.1	95	98	3.3	4.3	161	364	133	136	3.8	4.3	4.2
1	0	1	3	5	1	1	3	0	0	0	0	0	0	0	0	0	0	0	0	0	2	68	30.9	31	9.3	9.3	157	163	6.1	7.2	12	13	29	32	11	11	8	8	94	96	0.7	0.7	197	237	133	137	3.3	3.5	2.3
0	1	1	3	7	4	1	2	0	0	0	0	0	0	0	0	0	0	0	0	0	3	51	39.6	43.4	13.4	15	267	297	6	6.3	12	15	26	29	8	11	7.9	8.8	90	96	0.6	0.7	94	152	127	131	3.8	7.4	0.8
0	0	1	8	13	6	4	3	1	0	0	0	0	0	0	0	0	0	0	0	0	2	78	23.6	25.6	7.6	8.3	83	124	9.4	12.2	6	9	22	23	13	13	8.7	8.7	113	113	0.7	0.8	129	98	142	142	4.2	4.8	1
0	0	4	4	3	1	1	1	0	1	0	0	0	1	0	0	0	0	0	0	0	13	64	22.9	36.4	7.1	11	203	355	1.6	7	14	17	16	19	11	15	7.7	8.4	106	110	0.7	1.2	64	109	138	142	3.9	4.5	4.5
0	0	1	2	14	6	4	4	1	0	0	0	0	0	0	0	0	0	0	0	0	3	71	35.3	36.1	11.7	11.8	275	275	9.5	12.2	18	18	19	23	15	16	8	8.1	103	105	0.9	1	106	116	138	140	3.6	4.1	1
0	1	1	2	13	5	5	3	2	0	0	0	0	0	0	0	0	0	0	0	0	2	75	22	30.6	8.1	10.2	129	166	7.9	13.3	9	10	22	25	13	14	7.3	7.8	105	112	0.6	0.7	107	157	135	140	3.8	4.5	0.9
0	1	1	2	13	6	4	3	0	0	0	0	0	0	0	0	0	0	0	0	0	3	82	36.2	38.9	11.9	12.8	269	308	12.6	17.1	13	16	20	24	19	23	8.4	8.6	100	103	1.2	1.2	117	292	131	136	3.9	4.5	1.4
0	1	1	7	3	1	1	1	1	1	0	0	0	0	0	0	0	0	0	0	0	5	60	27.2	30.6	10	11.4	48	175	12	21.4	6	20	25	32	16	27	7.9	9.3	102	107	0.7	0.8	103	268	139	142	4.2	5.3	1
1	1	3	7	6	4	1	1	3	1	0	0	0	1	0	0	0	0	0	0	1	8	49	33.4	36.5	10.7	11.7	188	257	18.8	31.1	22	29	16	24	96	114	7.9	8.1	94	97	7.5	8.6	53	69	136	137	4.3	5.2	2.1
1	1	4	2	15	3	0	2	0	0	0	0	0	0	0	0	0	0	0	0	0	3	80	41.7	45.7	13.8	15.7	82	93	12.4	13.1	16	21	19	21	39	42	7.9	8	105	110	2.2	2.4	154	172	136	144	4.3	5.5	0.9
0	0	2	6	7	4	1	2	1	0	0	0	0	0	0	0	0	0	0	0	0	3	57	19.8	30.8	6.6	10.7	176	337	9.8	21	12	17	23	25	13	19	8.7	9.5	98	109	0.5	0.6	123	125	134	139	4.6	5.1	1.8
0	1	1	3	14	6	5	3	1	1	0	0	0	0	0	0	0	0	0	0	0	3	65	23.9	29.7	8.2	10.2	205	218	10.6	13.1	7	12	19	22	17	18	7.1	7.6	105	109	0.6	0.9	77	181	132	134	4.1	4.9	1.3
0	0	4	2	14	6	5	3	0	0	0	0	0	0	0	0	0	0	0	0	0	3	73	29	30.6	9.5	10	70	75	18.5	21	16	18	16	18	51	56	6.2	6.3	106	111	2.3	2.4	118	135	136	139	3.7	3.9	1.9
1	0	1	3	10	5	1	4	1	0	0	0	0	0	0	0	0	0	0	0	0	13	78	24.4	33.4	10.5	11.5	106	158	14.9	20.4	12	18	22	26	53	71	8.2	8.8	103	108	1.8	2.5	202	244	138	141	4.9	6	2.1
0	1	1	5	6	4	1	1	0	0	0	0	0	1	0	0	0	1	0	0	1	9	78	18.7	28.3	5.8	9.2	111	239	15.9	35.4	21	34	9	20	79	111	7.9	9	93	102	3.8	4.7	42	206	129	135	5	5.4	3.6
0	1	1	2	15	6	5	4	1	0	0	0	0	0	0	0	0	0	0	0	0	3	48	35.2	40.4	11.7	13	197	260	14	19.2	10	11	23	25	9	10	8.6	7.8	104	110	0.5	0.6	131	131	135	140	3.7	4.1	1.3
0	0	2	3	3	1	1	1	0	0	0	0	0	1	0	0	0	0	0	0	0	13	73	30.9	32.3	10.2	10.6	178	202	14	17.5	14	16	25	26	25	26	8.5	8.6	105	105	0.9	1	76	117	140	142	4.1	4.4	2.4
0	0	3	10	9	5	1	3	1	1	0	0	0	0	0	0	0	1	0	0	0	2	81	26.3	29.8	7.8	8.8	402	451	19.4	25.9	16	21	14	17	76	89	8.6	9	100	106	3.4	4.5	127	265	135	139	5.1	6	1.8
0	1	4	2	14	6	5	3	0	0	0	0	0	0	0	0	0	0	0	0	0	2	22	36.8	39.6	12.4	13.4	237	309	12	20.8	14	16	24	25	7	16	8.7	8.8	98	99	0.8	1	119	168	137	139	4.3	4.3	2.6
0	1	1	7	8	3	3	2	0	1	0	0	0	0	0	0	0	0	0	0	0	14	42	48.4	51.6	14.8	16.1	214	286	8.3	33.3	15	22	15	19	14	24	7.7	8.4	103	116	0.9	2	165	198	134	143	4	6.7	1.8
0	1	1	6	15	6	5	4	1	0	0	0	0	0	0	0	0	0	0	0	0	2	58	38.4	44.6	13.6	15.8	127	166	16.5	18.4	14	17	19	20	20	23	8	8.1	105	107	1.4	1.5	164	164	137	137	4.4	4.4	1.4
1	1	1	2	15	1	0	1	0	0	0	0	0	0	0	0	0	0	0	0	0	4	46	43.8	48	14.6	15.8	193	265	6.5	15.2	15	26	16	21	8	17	7.3	8.9	102	111	0.6	1.1	79	298	142	143	2.7	4	1.7
0	0	1	3	14	6	4	4	0	0	0	0	0	0	0	0	0	0	0	0	0	13	68	23	34.9	8.2	10.3	107	132	6	10.2	9	14	18	24	6	9	7.9	8.1	108	110	0.2	0.4	94	164	135	141	3	3.5	1.3
0	1	1	6	13	6	4	3	0	2	0	1	0	1	0	0	0	0	0	0	0	2	52	23.8	28	8.2	9.4	318	353	11.8	13	14	17	18	23	14	17	7.5	9.6	102	115	0.6	1.1	122	143	142	148	3.6	5	2.9
0	0	1	7	3	1	1	1	0	0	1	0	0	0	0	0	0	0	0	0	0	16	58	34.3	36.9	11.2	12.4	10	55	7.4	9.7	16	17	18	19	41	50	8.5	8.8	104	107	1.5	1.7	224	224	137	137	3.2	3.5	1.4
1	0	1	6	10	6	1	3	1	0	0	0	0	0	0	0	0	0	0	0	0	14	74	19.3	25.4	5.8	7.7	57	127	9.8	16.2	12	14	28	28	32	37	9	9.7	100	100	0.6	0.6	105	142	136	137	4	4.9	0.9
0	0	4	3	6	4	1	1	0	1	0	0	0	0	0	0	0	0	0	0	0	17	32	36.9	37.6	11.8	12.6	161	195	16.1	20.5	12	19	19	27	9	11	8.7	8.8	98	102	0.6	0.6	86	101	131	137	3.5	4.6	1.6
0	1	1	4	3	1	1	1	0	0	0	0	0	0	0	0	0	0	0	0	0	8	59	23.1	25.9	6.6	7.8	149	284	11.8	16.8	17	20	16	18	92	112	7.2	7.5	108	111	2.4	3.7	94	133	138	140	5	5.5	2.8
1	0	1	6	6	4	1	1	0	0	0	0	0	0	0	0	0	0	0	0	0	3	49	24.8	27.5	8.4	9	245	339	6.4	7.5	8	16	21	32	4	11	6.1	9	103	121	0.5	0.8	92	161	125	145	3	4.2	1.5
1	1	1	4	14	6	5	3	0	1	0	0	0	0	0	0	0	0	0	0	0	2	70	29.2	30.8	9.3	9.6	22	27	9.3	12	13	23	11	17	36	44	8.2	8.6	103	106	1.4	1.7	77	121	136	138	3.3	4	1.9
0	1	1	2	10	6	1	3	0	0	0	0	0	0	0	0	0	0	0	0	0	4	53	32.6	39.6	11.4	12.9	326	373	18	22.9	11	15	25	28	18	22	8.1	8.5	104	108	0.7	0.7	93	119	141	143	3.6	3.8	1.3
0	1	1	8	3	1	1	1	0	0	0	0	0	0	0	0	0	0	0	0	0	2	57	28.1	33.9	9.5	10.3	183	222	13.6	18.7	14	17	22	23	15	18	8.4	8.4	104	107	0.9	1.1	100	100	138	140	4.3	4.5	1.1
0	1	1	8	13	6	4	3	0	1	0	0	0	1	0	0	0	0	0	0	0	2	90	37.2	41.5	12.9	14.1	74	95	17.7	27.3	22	33	10	14	24	30	8.7	9.3	101	108	1.4	1.5	90	213	137	141	4.1	4.7	3.4
0	0	4	6	15	6	5	4	0	2	0	0	0	0	0	0	0	0	0	0	0	2	59	26.6	28.2	8.4	9.2	103	147	9.6	25.6	15	17	17	20	18	22	8	8.4	102	108	0.9	1.3	109	144	138	141	3.6	4.2	3.8
0	1	1	4	15	6	5	4	1	0	0	0	0	0	0	0	0	0	0	0	0	2	83	24.7	35.4	8.6	11.9	113	146	16.6	21.4	12	13	19	23	22	24	7.5	7.3	108	111	0.9	1.1	95	98	137	139	4.1	4.7	0.9
0	0	1	2	15	6	5	4	0	0	0	1	0	0	0	0	0	0	0	0	0	2	60	33.5	33.5	10.9	10.9	202	202	16.9	16.9	14	14	24	24	23	23	7.8	7.9	103	103	1.2	1.2	127	127	141	141	3.5	3.5	0.6
0	1	4	2	15	6	5	4	0	1	0	0	0	0	0	0	0	0	1	0	0	2	53	24.1	26.7	8.7	9.6	154	184	5.1	7.5	10	13	30	33	6	7	6.4	7	84	104	0.5	0.6	133	205	127	146	2.3	3.8	1.5
0	1	1	7	14	6	4	4	0	0	0	0	0	0	0	0	0	0	0	0	0	4	80	23.5	28.4	8	9.5	77	138	10.8	14	9	10	22	24	13	14	7.8	7.8	107	109	0.7	0.8	133	133	139	139	4.4	4.4	1.9
0	0	4	2	5	3	1	1	1	1	0	0	0	0	0	0	0	0	0	0	0	15	52	32.6	38.1	11.2	12.6	204	233	18.7	23	11	17	15	24	8	13	7.9	8.6	112	113	0.4	0.6	131	217	141	145	3.3	4	1.5
1	0	1	3	10	6	1	3	0	1	0	0	0	0	0	0	0	0	0	0	0	5	67	19.5	35.1	6.1	11.2	116	204	5.8	16.4	10	15	13	21	11	23	4.2	8.2	107	125	0.5	1	82	216	139	146	2.3	4.1	1.4
0	0	1	3	14	6	4	4	0	0	0	0	0	0	0	0	0	0	0	0	0	2	80	21.7	26.7	7.6	8.9	84	141	3.7	9.2	13	15	20	21	24	41	8.5	8.7	104	107	1	1	114	208	132	138	4.6	4.9	1.5
0	1	1	3	11	6	1	4	0	1	1	0	0	0	0	0	0	0	0	0	0	3	87	37	44.1	12.4	14.1	158	209	9.4	9.5	13	21	24	28	11	12	8.4	8.4	98	101	0.8	0.8	129	136	138	138	4.1	4.5	2
1	1	3	6	3	1	1	1	1	2	0	0	0	1	1	0	0	0	0	0	0	2	85	20.5	21.5	6.2	6.8	252	342	8.3	14.1	16	29	10	21	34	44	7.6	8.1	110	114	2	2.5	210	326	141	147	4.4	6	3.3
0	1	1	2	4	2	1	1	1	0	0	0	0	0	0	0	0	0	0	0	0	6	45	31.9	36.6	11.7	12.9	172	228	2	6.3	14	16	20	21	9	11	7.3	7.9	105	109	0.8	0.9	94	111	138	141	2.9	4.3	3.3
0	0	2	4	11	6	1	4	0	1	0	0	0	0	0	0	0	0	0	0	0	5	21	29.7	32.5	9.9	10.8	273	294	13.6	18.3	13	14	22	23	9	9	7.8	7.9	104	107	0.7	0.8	93	100	136	139	3.7	3.8	1
1	1	4	3	3	1	1	1	0	1	0	0	0	0	0	0	0	0	0	0	0	2	18	27.4	40.9	9.2	14	87	148	6.3	12.2	10	13	22	26	10	13	7	8.6	105	126	0.7	1	92	164	131	160	3.5	5.8	1
0	0	1	5	8	5	1	2	0	1	0	0	0	0	0	0	0	0	0	0	0	30	65	38	44.6	12.5	14.1	197	243	10.9	25.7	11	18	10	19	12	16	6.1	10.7	109	119	0.5	0.7	145	241	136	140	3.2	4.7	1.1
0	0	1	3	14	6	5	3	2	0	0	0	0	0	0	0	0	0	0	1	0	14	71	18.2	26.6	6	8.5	200	227	20.5	23.9	13	16	22	25	35	39	8.5	8.8	107	108	0.8	0.8	159	164	141	143	3.2	3.9	3.4
0	1	1	8	14	6	5	3	1	0	0	0	0	0	0	0	0	0	0	0	0	4	66	17.5	35.9	5.6	12.9	87	232	1.6	5.3	12	22	30	37	24	29	12.9	15	102	105	1.4	1.7	101	209	149	151	3	5.3	2
0	0	4	8	15	6	5	4	0	0	0	0	0	0	0	0	0	0	0	0	0	4	80	37.1	40.3	12.1	13.5	216	252	12.9	14.5	16	21	24	24	54	57	9	10.5	98	103	1.9	2	97	145	137	138	4.9	5.8	1.2
0	1	1	5	13	5	4	4	2	0	0	0	0	0	0	0	0	0	0	0	0	3	86	29	33.4	9.8	9.8	125	125	1.2	1.2	11	15	18	20	50	50	7.5	8.2	113	116	1.5	1.8	117	191	141	143	4.2	5.2	0.8
0	0	1	3	6	4	1	1	0	0	0	0	0	0	0	0	0	0	0	0	0	2	60	36	37.7	11.7	11.8	349	383	5.6	10.7	14	16	23	23	10	15	8.9	9.2	102	105	0.5	0.6	81	99	136	138	3.8	4.7	1.2
0	1	1	4	15	6	5	4	0	0	0	0	0	0	1	0	0	0	0	0	0	2	81	37.8	38.2	11.7	12.5	209	210	11	12.7	12	13	20	22	15	27	7.1	7.1	108	108	0.9	1.1	136	138	137	138	3.5	4	1
1	0	1	2	3	1	1	1	0	1	0	0	0	0	0	0	0	0	0	0	0	21	80	31.1	37.4	9.7	11.4	190	262	14.1	20.2	8	12	22	25	37	39	8.4	8.6	111	114	1.8	2.2	180	305	144	146	4.7	5.3	1
0	1	4	3	15	6	5	4	0	0	1	0	0	0	0	0	0	0	0	0	0	4	90	26.5	30	8.5	9.7	218	227	13.1	17.8	18	27	24	28	42	69	8.4	8.7	94	95	4	5.3	145	170	135	141	4.6	4.7	2.2
0	1	1	3	11	5	4	2	0	0	0	0	0	1	0	0	0	0	0	0	0	3	44	30.9	38.2	10.8	13.1	236	297	14.2	21.5	15	16	24	28	16	17	7	7	94	101	0.9	1	103	105	134	135	4	5	1.1
0	1	4	5	14	6	5	3	0	1	0	0	0	0	0	0	0	0	0	0	0	2	68	28	28.8	9.3	9.7	159	171	4.2	13.1	12	14	21	24	17	17	8.3	8.5	101	103	0.8	1	76	91	137	138	3.8	4.2	3.6
0	1	1	3	15	1	0	1	1	0	0	0	0	0	0	0	0	0	0	0	0	2	73	21.4	29.4	8.5	9.3	104	148	7	7.2	11	11	23	24	17	18	8.5	8.1	111	113	0.8	0.9	136	136	141	141	4	4.1	1.1
0	0	1	2	11	5	3	3	1	0	0	0	0	0	0	0	0	0	0	0	0	4	93	20.8	26.2	7.2	9.2	298	298	9.1	14.8	15	15	19	19	19	19	8.2	8.2	96	105	0.6	0.6	211	211	127	136	3.3	4.2	1.6
0	0	1	4	6	1	1	4	0	0	0	0	0	2	0	0	0	0	0	0	1	19	61	24.1	27.1	8	8.5	211	312	20.7	26	15	21	10	19	41	54	7.3	8.4	103	120	2.6	3.3	109	233	136	141	3.9	5.6	1.6
0	1	1	2	14	6	5	3	0	1	0	1	0	0	0	0	0	0	0	0	0	9	67	34.5	35.4	11.4	12.2	403	500	7.1	9.9	26	27	18	19	18	20	9.2	9.2	94	95	0.6	0.7	207	210	133	134	4.8	7	1.9
0	1	4	5	15	6	5	4	0	1	0	0	0	0	0	0	0	0	0	0	0	2	85	30.4	31.8	9.9	10.5	111	122	17.2	17.6	17	21	24	27	25	30	7.7	7.9	99	99	4	4.9	106	107	139	140	3.7	3.7	1.5
0	0	1	4	13	6	4	3	0	0	1	0	0	0	0	0	0	0	0	0	0	17	36	21.9	28.1	7.4	9.5	263	388	6.9	10.1	13	17	19	21	6	8	7.6	9.1	97	100	0.6	1	59	119	127	131	3	5.5	2.8
0	1	1	4	15	6	5	4	1	0	0	0	0	0	0	0	0	0	0	0	0	6	82	28.2	37.9	9.8	12.7	85	161	16.7	33.4	11	13	21	23	15	15	8.1	7.4	106	108	0.6	0.7	175	175	135	138	3.4	4.8	1.3
0	1	1	6	5	1	1	3	2	0	0	0	0	0	0	0	0	0	0	0	0	2	66	22	25.4	7.2	8.3	242	335	5.1	7.9	20	25	22	24	67	69	8.1	8.9	89	97	9.8	10.1	158	208	132	134	4.6	5.8	1.2
0	1	4	2	11	6	2	3	1	1	0	0	0	0	0	0	0	0	0	0	0	3	63	33.4	33.4	11.7	11.7	141	141	10.4	10.4	8	8	21	21	14	14	7.5	7.5	107	107	0.9	0.9	113	113	132	132	4	4	1
0	1	1	4	13	6	5	2	0	0	0	0	0	0	0	0	0	0	0	0	0	13	62	38.7	41.1	12.6	13.4	146	170	17.8	20.4	15	16	23	24	21	26	8.4	8.8	102	102	1.2	1.3	118	128	141	141	5	5.1	1.5
0	0	1	2	10	5	2	3	0	0	0	0	0	0	0	0	0	0	0	0	0	2	75	34.5	40.1	11.6	13.3	353	413	10.9	12.5	13	21	19	23	6	9	8.5	9	104	106	0.4	0.4	76	99	137	140	3.4	4	1.6
0	0	4	4	7	5	1	1	0	0	0	0	0	0	0	0	0	0	0	0	0	16	48	29.3	29.8	8	8.2	110	159	6.4	8.4	10	12	34	34	6	7	8.1	8.2	101	101	0.3	0.3	133	153	145	147	3.2	3.7	1.3
0	1	1	9	4	1	1	2	2	0	0	0	0	0	0	0	0	0	0	0	0	7	83	28.5	34.1	9.3	11.6	372	443	8.1	12.7	9	16	19	25	27	36	6.5	8.2	90	102	0.6	1	20	65	125	132	3.8	4.5	1.6
0	1	1	2	14	6	4	4	0	0	0	0	0	0	0	0	0	0	0	0	0	3	57	28.1	30.4	9.6	10.2	285	328	10.1	11.1	14	19	24	27	17	20	7.8	8.3	98	99	0.6	0.6	103	109	135	138	4	4.4	2.5
1	0	1	2	6	4	1	1	0	0	0	0	0	0	0	0	0	0	0	0	0	15	77	36.9	39	12.5	13.2	197	217	15.9	19.4	14	14	27	27	27	27	8.7	8.7	98	98	1	1.2	203	203	136	136	2.8	2.8	2.3
1	1	1	2	13	6	4	3	1	0	0	0	0	0	0	0	0	0	0	0	0	15	62	31.8	34.4	10.3	10.9	168	173	17.6	36	18	18	20	21	45	53	8.1	8.8	103	105	2	2.2	188	194	137	138	4.5	5.1	2.5
0	1	3	5	14	6	4	4	1	1	0	0	0	1	0	0	0	0	0	0	0	4	84	33.2	41.5	11.8	14.4	67	136	2.6	11.2	16	27	12	18	24	27	6.5	7.8	98	109	1.4	1.6	89	422	134	140	3	3.9	2.5
0	0	1	2	11	6	1	4	0	0	1	0	0	0	0	0	0	0	0	0	0	8	90	27.2	37	9	12.4	193	225	9.8	12	13	16	24	26	16	27	8.2	8.6	107	108	0.9	1.3	124	200	142	145	3.5	6.1	1.5
0	1	1	2	14	6	4	4	1	0	0	0	0	0	0	0	0	0	0	0	0	3	79	21.3	38.3	7.2	12.9	115	223	7.7	9.8	11	14	21	24	16	27	8.9	8.9	106	116	0.7	1.1	97	169	140	142	4.3	4.5	1.5
1	1	1	4	8	4	1	1	0	0	0	0	0	0	0	0	0	0	0	0	0	4	68	36.6	37.9	12.4	13	187	198	8.4	12.4	11	14	24	26	21	24	7.3	8.8	101	107	0.8	1	96	115	134	141	3.2	5.2	1
0	0	1	7	11	6	1	4	0	1	0	0	0	0	0	0	0	0	0	0	0	4	56	18.7	31.9	6.6	10	27	42	5.7	6.3	10	10	28	33	28	30	6.7	7.3	93	99	0.9	1	100	107	132	133	3.5	4	1
0	1	1	4	14	6	5	3	0	1	0	0	0	1	0	0	0	0	0	0	0	3	67	29	31.7	8.9	10	198	253	11.8	15.6	10	13	18	20	18	22	7.5	8.3	104	106	0.5	0.6	146	153	134	137	3.6	4.5	1.8
0	0	2	8	6	4	1	1	0	1	0	0	0	1	0	0	0	0	0	0	0	3	92	28.7	38.2	9	11.6	89	127	6.2	12	8	15	20	27	32	63	8	9.3	108	119	1	1.3	85	306	146	151	4.8	7.6	1.2
1	0	2	2	15	6	0	3	0	1	0	0	0	0	1	0	0	0	0	0	0	2	59	23	32.8	6.8	9.5	357	482	12.3	17.6	7	13	22	32	18	22	9.9	12.3	94	103	0.4	0.6	149	178	136	141	4.1	4.9	2.1
1	0	4	9	15	1	0	1	0	0	1	0	0	1	0	0	0	0	0	0	0	2	65	34	40.4	11	12.4	110	163	12.3	29.7	14	22	15	19	16	30	7.6	9.7	108	118	1	1.7	133	321	142	144	4	4.6	4.5
1	1	4	3	3	1	1	1	0	0	0	0	0	1	0	0	0	0	0	0	0	4	62	39.3	44.4	13	14.4	310	375	13.6	16.9	15	22	20	22	181	211	8.2	9.1	123	128	3.7	4.6	96	367	160	165	4.1	4.7	1.8
0	0	1	4	14	6	4	4	0	0	0	0	0	1	0	0	0	0	0	0	0	6	57	35.9	43.9	11.9	13.4	129	166	11.4	14.9	10	14	18	23	57	60	6.9	8.4	107	113	1	1.5	192	194	136	139	4.4	6.4	1.9
0	1	4	7	7	4	1	2	0	0	1	0	0	0	0	0	0	0	0	0	0	4	90	27.3	30.1	8.3	9	531	565	23.1	29.6	19	21	25	25	90	93	9	9.5	98	103	2.7	2.8	238	299	138	142	4.5	5	2.1
0	0	1	3	7	4	2	1	0	0	0	0	0	1	0	0	0	0	0	0	0	4	63	37.8	44.6	12.1	13.9	325	343	9.4	10.6	16	17	18	20	15	15	7.8	8.1	100	101	0.9	0.9	99	113	131	132	4.3	4.5	1
0	0	4	4	15	6	5	4	0	0	0	0	0	0	0	0	0	0	0	0	0	2	60	27.6	40.1	9	13.1	45	161	6.5	8.4	11	15	17	20	14	16	7.2	8.3	106	109	0.8	1.1	80	327	138	140	3.6	5	1.2
0	0	1	2	14	6	5	3	0	0	0	0	0	0	0	0	0	1	0	0	0	5	61	27	28.4	7.8	8.4	146	174	1.6	12.3	12	16	27	30	35	37	7.9	8.5	96	100	1.6	2.2	99	122	136	139	3.7	4.5	2.2
0	1	1	5	15	6	5	4	0	0	0	0	0	0	0	0	0	0	0	0	0	4	89	37.4	37.4	12.3	12.6	117	130	7.3	8.9	19	24	18	25	70	78	9.1	9.5	92	95	2	2.1	140	176	131	134	4.1	6	1.7
0	1	4	9	8	5	2	1	0	0	0	0	0	0	0	0	0	0	0	0	0	2	90	28.6	28.6	9	9	80	80	6	6	18	18	21	21	39	39	8.6	8.6	113	113	1.7	1.7	90	90	148	148	4.2	4.2	1.2
1	1	1	2	3	1	1	1	0	0	0	0	0	0	0	0	0	0	0	0	0	11	58	23.7	42.6	9.3	14.4	96	200	11.6	22	10	13	19	23	17	19	7.2	8.1	114	119	0.7	0.9	113	182	142	143	3.8	4.9	1.9
0	1	1	2	10	6	1	3	0	0	0	0	0	0	0	0	0	0	0	0	0	14	74	27.7	35.1	10.5	11.9	127	175	13.7	20.9	12	12	23	23	16	21	8.1	8.1	110	110	1	1.2	181	181	140	140	4.9	5.2	1.7
1	1	1	3	3	1	1	1	0	0	0	0	0	0	0	0	0	0	0	0	0	11	68	40.2	40.4	14	14.5	254	276	12	16.4	16	18	24	25	15	18	9.4	9.4	100	109	0.8	0.9	104	212	137	140	3.5	3.8	3.1
0	0	4	8	15	6	5	4	0	0	0	0	0	0	0	0	0	0	0	0	0	10	83	19.3	26.4	7.1	9	5	21	6.8	9	12	20	24	27	83	90	8.1	8.9	102	103	2	2.2	60	132	137	142	3.7	4.6	1.9
1	0	4	2	10	5	1	4	0	0	0	0	0	0	0	0	0	0	0	0	0	17	75	31.9	36.2	9.9	11	273	361	19.2	22.2	10	11	25	28	56	64	8.6	9.5	112	116	1	1.1	132	225	147	149	3.9	4.4	1.4
0	1	1	3	12	5	4	3	1	1	0	0	0	0	1	0	0	0	0	0	0	2	86	28.1	29	10.4	10.4	260	260	15.7	15.7	12	12	20	20	21	21	7.5	7.5	107	107	1.1	1.1	284	284	135	135	4.2	4.2	1.1
0	1	2	4	14	6	5	3	0	1	0	0	0	0	0	0	0	0	0	0	0	2	26	25	27	8.3	8.7	217	232	10.2	12.3	13	22	15	20	49	62	6.7	8.3	100	110	6.8	7.9	79	691	131	139	3.4	5.4	0.9
0	0	1	2	10	6	1	3	1	0	0	0	0	0	0	1	0	0	0	0	0	9	44	22.5	27.6	8.2	9.9	84	139	12.3	18.3	12	14	23	25	31	34	9.3	10	103	105	1.6	1.7	181	210	136	138	4.3	4.6	1.3
0	1	1	3	12	6	4	1	0	0	0	0	0	0	0	0	0	0	0	0	0	3	74	25.9	31.3	8.6	10.2	113	157	6.9	21.7	12	17	20	24	30	31	7.8	8.7	104	106	1.5	1.7	113	241	139	142	4	4.5	0.7
0	0	1	4	10	6	1	3	1	0	2	0	0	1	0	0	0	0	0	0	0	2	75	36.7	38.2	12.5	12.9	367	379	29.1	31.8	9	20	26	31	20	21	7.3	8.6	91	104	0.6	1.1	156	301	136	139	2.9	3	2.1
0	1	4	4	12	4	4	4	0	1	0	1	0	1	0	0	0	0	0	0	0	4	81	47.6	50.4	16	17	98	109	11.2	11.3	24	34	13	16	60	63	8.6	9.2	94	97	4.1	4.3	148	221	136	141	3.6	4.1	1.1
0	0	1	2	9	4	1	4	0	0	0	0	0	0	0	0	0	0	0	0	0	23	45	30.6	32.5	10.3	10.7	357	398	16.3	18.3	9	10	24	25	14	16	7.3	8	110	114	0.3	0.4	110	125	140	145	3.3	3.7	1.2
0	1	1	9	15	6	5	4	0	0	0	0	0	0	0	0	0	0	0	0	0	2	80	28.7	37.1	9.1	11.3	148	249	4.8	8.4	15	16	25	28	60	67	8.4	9.1	107	108	2.6	3.1	118	212	144	146	3.8	4.8	0.8
0	0	4	8	10	5	2	3	1	1	0	1	0	0	0	0	0	0	0	0	0	4	87	21.2	30.7	6.1	9	407	535	9.3	16.2	11	18	17	19	28	33	6.8	8.6	103	114	0.9	1	98	436	136	140	3.7	4.2	1.2
0	1	4	4	13	6	4	3	0	0	0	0	0	0	0	0	0	0	0	0	0	12	60	19.9	26.1	6.6	8.8	10	29	1.2	1.4	11	12	20	21	12	13	7.7	7.9	105	106	0.6	0.6	95	110	136	138	4.1	4.5	1
1	1	1	7	7	5	1	1	0	1	0	0	0	0	0	0	0	0	0	0	0	4	76	34.6	37	12	12.9	135	147	7.6	8.1	25	26	17	17	132	138	9.1	9.3	101	102	6.1	6.2	90	101	139	139	4.7	4.9	2.2
0	1	4	2	9	5	1	3	0	0	0	0	0	0	0	0	0	0	0	0	0	2	65	43.8	43.8	14.4	14.4	162	162	6.1	6.1	17	17	19	19	14	14	8.8	8.8	103	103	0.7	0.7	141	141	139	139	4.4	4.4	1
0	1	1	3	11	6	1	4	1	1	0	0	0	1	0	0	0	0	0	0	0	8	59	24.9	30.3	8.2	10	351	461	19.6	20.6	11	13	25	25	8	8	7.2	7.8	101	104	0.6	0.7	96	122	135	136	4	4.1	1
0	1	1	6	14	6	5	3	0	0	0	0	0	0	0	0	0	0	0	0	1	3	61	21.1	26.3	7	8.6	55	118	27.3	39.6	19	28	12	19	115	186	8.6	9.3	94	98	5	6.8	105	146	132	139	6.2	7.1	1.5
0	1	4	3	14	6	5	3	1	1	0	0	0	0	0	0	0	0	0	0	0	3	47	38.5	43.7	13	14.9	148	211	9.7	13.1	11	13	24	27	10	24	8.3	8.9	102	110	0.6	1.1	102	129	142	147	2.7	4.2	1.3
1	1	1	7	3	1	1	1	1	0	0	0	0	0	0	0	0	0	0	0	0	20	55	36.9	44.5	13.8	14.9	155	201	5.8	18.2	12	18	19	20	18	20	7.4	8	106	108	0.9	1.3	147	209	133	140	3.5	5	2.9
0	0	1	8	6	1	1	2	0	0	0	0	0	0	0	0	0	0	0	0	0	8	62	27.1	29.5	8.6	9	122	136	17.3	22.3	14	21	13	21	31	33	8.2	8.7	102	105	1.3	1.5	180	254	133	135	3.7	4.1	1.9
0	1	3	2	13	4	5	4	0	1	0	0	0	1	0	0	0	0	0	0	0	2	80	19.6	24.9	6.3	8.4	337	384	8.4	10.4	13	18	18	19	18	27	7.2	7.5	101	105	0.5	0.7	80	144	133	135	3.6	3.8	1.2
0	1	1	2	14	6	5	3	0	1	0	0	0	1	0	0	0	0	0	0	0	5	72	48.5	50.5	15.6	16.2	297	317	15.6	19	12	16	14	19	10	13	5.5	9.5	106	117	0.5	1.1	82	161	141	143	2.5	4.5	1
0	1	2	4	15	6	5	4	0	0	1	0	0	0	0	0	0	0	0	0	0	2	45	33.4	35.7	11.5	11.8	113	121	7	9	10	12	21	22	17	20	7.3	7.3	105	108	1.8	1.8	98	116	135	137	3.8	4	1.5
0	1	1	2	14	6	5	3	0	0	0	0	0	1	0	0	0	0	0	0	0	3	57	38.2	41.4	12.8	13.4	222	268	12.2	13.4	15	16	20	23	25	34	6.6	7.2	105	110	1.8	3.6	95	174	137	140	4.6	5.5	0.9
0	1	4	2	13	6	4	3	0	0	1	0	0	0	1	0	0	0	0	0	0	2	73	28.8	31.2	9.3	10	280	282	12.1	17.2	15	17	25	27	59	75	8.3	8.4	105	106	2.5	2.8	157	208	143	145	3.6	3.9	2.1
0	1	1	7	15	6	5	4	1	1	0	0	0	0	0	0	0	0	0	0	0	4	53	25.2	31.4	8.1	10.2	273	373	10.2	16.6	16	17	23	24	38	39	8.4	8.4	106	107	5.8	6.4	91	91	140	142	4.9	5.5	0.8
0	1	4	3	14	6	4	4	0	1	0	0	0	0	0	0	0	0	0	0	0	2	66	27.9	29.9	9.3	10	121	136	10	10.9	11	11	23	25	10	11	8.1	8.2	103	104	1.1	1.2	107	131	137	139	3.8	3.9	3
0	0	2	6	4	1	2	1	0	0	0	0	0	0	0	0	0	0	0	0	0	5	61	33.1	46.6	10.9	15.4	152	356	4.2	9.1	14	28	13	22	20	56	8.3	10.4	102	115	0.6	1.5	123	291	140	150	3	4	2.6
0	1	1	2	7	5	1	1	0	0	0	1	0	0	0	0	0	0	0	0	0	4	40	35.6	40	12.6	13.6	166	196	15.3	16.2	10	17	22	26	20	23	8	8	106	111	0.9	1.2	156	163	140	143	4.3	5	1.5
1	1	1	3	15	4	0	1	0	1	0	0	0	0	0	0	0	0	0	0	0	3	82	31.3	39	9.7	12	190	251	8.3	11.1	19	22	16	19	18	24	8.2	8.8	99	107	1.3	1.4	125	182	140	143	3.2	5.2	1.6
0	1	4	3	11	6	2	3	0	1	0	0	0	0	0	0	0	0	0	0	0	2	69	27.6	39.8	9.6	12.7	118	298	11.2	17.5	9	14	11	27	16	38	4.6	9	97	102	0.9	1.8	102	617	127	139	4.5	6.3	2.4
0	1	4	9	11	6	1	4	1	0	0	0	0	0	0	0	0	0	0	0	0	3	53	27.8	33.4	8.8	10.7	124	145	13.2	17	11	12	24	27	18	18	8.6	9.5	103	109	1.2	1.5	127	127	136	141	4.2	5	1
1	0	1	2	7	4	2	1	0	0	0	0	0	0	0	0	0	0	0	0	0	5	84	27.9	41	9.4	13.4	194	217	10.7	14.4	13	20	23	26	15	24	9	9.1	97	106	0.7	0.9	83	237	134	142	3.4	4.2	2.4
0	1	4	2	14	6	5	3	0	0	0	0	0	0	0	0	0	0	0	0	0	3	65	30.3	30.3	9.8	9.8	532	532	11.1	11.1	15	15	24	24	74	74	7.4	7.4	104	104	2.9	2.9	126	126	138	138	4.9	4.9	1
0	0	4	4	14	6	4	4	1	1	0	0	0	0	0	0	0	0	0	0	0	6	90	27.4	30.1	8.5	9.4	184	246	8.7	12.5	15	18	23	25	56	64	8	8.8	105	108	1.6	1.7	109	154	146	149	3.5	3.9	1.1
0	0	2	4	11	6	1	4	0	0	0	0	0	0	0	0	0	0	0	0	0	2	84	36.5	46.8	10.9	13.9	335	357	28.1	31.3	14	22	19	23	65	77	9.1	9.7	119	131	2.5	3.2	102	195	156	169	3.7	6	1.8
1	1	3	2	3	1	1	1	1	0	0	0	0	0	0	0	0	0	0	0	0	11	60	45	48.7	16.1	17.2	105	120	8.6	11.7	15	17	21	24	11	14	8.9	9.1	105	114	0.7	0.8	116	153	140	149	3	4.8	1.5
1	1	1	11	13	6	4	3	0	1	0	0	0	0	0	0	0	0	0	0	0	2	50	27.1	27.2	9.7	9.9	70	87	5.5	6.6	21	26	13	18	91	103	7.6	7.8	95	98	6	6.6	69	120	130	133	3.4	7.7	1.4
0	0	1	6	9	5	1	3	2	0	0	0	0	0	0	0	0	0	0	0	0	8	78	26.2	32.4	9.6	11.5	212	253	13.9	17.6	18	19	24	26	33	42	8.2	8.2	95	97	1.8	2.3	129	159	134	137	3.3	3.6	1.3
0	0	1	2	10	6	1	3	0	0	0	0	0	0	0	0	0	0	0	0	0	8	66	36.7	41.5	12.4	13.9	321	391	21.8	24.5	16	18	22	25	12	22	9	9.6	95	99	0.5	0.7	109	140	133	135	3.8	4.6	0.9
0	1	1	3	7	5	1	1	2	0	0	0	0	0	0	0	0	0	0	0	0	5	43	52.8	53.9	16.3	17.1	179	187	22.8	26.6	10	13	27	33	27	28	8.2	8.4	96	98	1.2	1.3	207	342	136	142	5.8	6.4	1.7
0	0	2	3	3	1	1	1	1	0	0	0	0	0	0	0	0	0	0	0	0	39	67	30.5	35.7	10.4	12.3	236	248	11.8	15.2	13	14	27	29	24	26	7.6	8.4	103	109	1.3	1.4	179	195	146	149	3.2	3.9	1
0	1	1	2	14	6	4	4	0	0	0	0	0	0	0	0	0	0	0	0	0	2	61	22.2	26.2	7.5	8.7	246	270	13.3	17.8	21	29	8	12	38	71	3.5	4.7	97	112	2.2	5.9	70	151	130	140	4.8	6.2	0.6
1	1	4	2	6	4	1	1	0	4	0	0	0	1	0	0	0	0	0	0	0	5	83	34.8	34.9	11.5	11.5	170	185	12.4	15.9	13	14	20	22	11	13	7.3	7.5	107	109	0.9	1.1	119	130	137	138	4.2	5.6	0.9
0	0	1	6	15	1	0	1	0	0	0	0	0	0	0	0	0	0	0	0	0	2	53	32.2	39.7	10.9	13.1	155	206	16	19.8	13	15	24	25	16	17	8.9	8.7	108	109	0.8	0.9	105	105	142	144	3.7	4.1	1.6
0	0	1	2	5	3	1	1	2	1	0	0	0	0	0	0	0	0	0	0	0	23	76	26.5	33.5	8.8	10.5	454	543	26	33	13	19	19	23	10	15	7.4	8.1	87	109	0.5	0.7	141	213	127	144	3.4	4	0.9
0	1	1	7	4	2	1	1	0	0	0	0	0	0	0	0	0	0	0	0	0	3	62	29.7	41.2	10.3	14.2	124	197	7.2	20.9	9	14	23	25	25	30	9	9	103	111	0.9	1.2	93	101	138	139	4.4	4.7	1.1
0	0	2	2	14	6	4	4	0	1	0	0	0	1	0	0	0	0	0	0	0	2	86	25	25	7.7	7.7	193	193	6	6	12	13	27	28	32	35	9.2	9.4	104	104	1	1.1	86	95	144	144	3.9	4.4	1.3
0	1	1	7	13	6	4	3	0	0	0	0	0	1	0	0	0	0	0	0	0	6	71	41	44.9	12.8	14.2	207	250	19.4	20.8	13	21	16	27	18	36	7.8	8.2	103	107	2.2	2.4	149	324	141	143	4.1	5.3	0.8
0	1	1	4	15	1	0	1	1	0	0	0	0	0	0	0	0	0	0	0	0	2	77	28.8	36.1	10.1	12	98	106	13.2	15.4	14	15	23	24	20	23	8.3	8.5	106	107	0.8	0.9	129	165	139	140	4.2	4.7	0.8
0	1	1	4	13	5	4	4	1	1	0	0	0	0	0	0	0	0	0	0	0	4	56	26.5	36.6	9.2	12.4	41	64	3.8	5.8	12	15	18	21	21	24	8.6	8.8	110	112	1.4	1.8	107	156	138	139	4.4	4.8	2.7
0	1	1	2	13	6	4	3	0	0	0	0	0	0	0	0	0	0	0	0	0	4	77	31.9	32.4	11.6	11.8	245	251	11.3	12	13	13	23	23	18	23	8.5	8.5	108	108	1.1	1.2	134	134	140	140	4	4	1.9
1	0	1	3	7	4	1	2	0	0	0	0	0	0	0	0	0	0	0	1	0	3	95	19.9	28.6	6	8.9	136	200	28.8	39.7	19	26	11	25	36	47	7.1	8.6	105	109	0.9	1.1	195	240	140	146	3.7	4.4	5.7
0	1	1	5	14	6	5	3	0	0	0	0	0	0	0	0	0	0	0	0	0	2	80	25.9	35.2	8.8	10.8	114	128	6.3	8.3	9	10	23	24	11	12	8	8.4	110	116	0.8	0.9	81	94	141	144	3.8	4.9	0.7
0	0	1	3	11	3	5	3	1	1	0	0	0	0	0	0	0	0	0	0	0	2	62	27.2	29.4	8.7	9.6	159	179	20.3	22.7	14	17	14	20	16	20	7.1	7.7	109	113	0.8	0.9	80	95	143	146	3	3.7	2
0	0	1	3	3	1	1	1	0	0	0	0	0	0	0	0	0	0	0	0	0	4	83	30.4	31.7	10.6	11.2	231	254	16.8	18.5	10	13	29	30	13	18	7.9	8.7	106	107	0.9	1.2	117	146	144	144	3.3	3.7	1.3
1	1	2	4	15	1	0	1	0	0	0	0	0	0	0	0	0	0	0	0	0	10	87	41.4	51.7	12.1	14.7	132	187	9.7	12.5	23	28	13	19	13	22	7.8	8.7	103	110	1.1	2.2	216	420	136	149	3.4	4.8	6.5
0	0	2	3	10	5	1	4	0	1	0	0	0	1	0	0	0	0	0	0	0	3	72	26.5	26.5	8.3	8.3	215	270	13.5	13.5	13	33	7	16	25	46	7.4	9.9	91	108	1.2	2.1	120	717	126	138	3.8	7.6	1.6
0	1	1	4	12	6	3	3	0	0	0	0	0	0	0	0	0	0	0	0	0	3	82	22	28.4	7.7	10	45	100	12.2	17.7	15	17	20	24	16	17	8.5	8.5	99	101	0.7	0.7	137	143	134	134	3.9	4.1	0.7
0	1	1	4	14	6	5	3	1	0	0	0	0	0	0	0	0	0	0	0	0	4	78	26.1	30.4	8	9.9	178	261	2.6	3.9	11	13	24	24	24	26	8.3	8.6	103	107	1.3	1.4	117	121	135	139	4	5	0.9
0	0	4	2	7	5	1	1	0	0	0	0	0	0	0	0	0	0	0	0	0	10	60	32.5	39.5	10.8	13.1	242	339	18.1	23.6	21	29	22	22	19	21	8.6	9.9	90	103	0.8	1	143	170	136	146	3.9	5	2.6
1	0	1	6	3	1	1	1	0	0	0	0	0	1	0	0	0	0	0	0	1	12	73	19.1	32.9	6	11.7	26	174	1.5	9.6	17	27	9	20	34	40	7.8	10.1	114	119	1.1	2.8	75	295	148	150	3	5.5	3.9
0	0	1	2	6	4	1	1	0	1	0	0	0	0	0	0	0	0	0	0	0	11	81	32.4	40.1	9.8	12	173	225	7.9	10.9	12	14	26	26	18	26	8.6	9.6	102	106	0.9	0.9	126	134	142	144	4	6.4	1.4
0	1	1	4	3	1	1	1	0	0	0	0	0	0	0	0	0	0	0	0	0	9	42	26.9	35.7	9.5	12.5	196	330	11.7	17.2	12	17	17	23	7	10	6.6	7.8	109	113	0.7	1	128	136	140	143	3.8	4	3.1
0	0	1	2	15	6	5	4	1	0	0	0	0	0	0	0	0	0	0	0	0	3	81	27.1	37.7	9.4	13.8	181	297	8.9	16.1	13	13	26	28	17	23	9.4	9.4	103	106	0.7	0.8	123	123	140	140	4	4	0.9
0	1	1	2	15	6	5	4	0	0	0	0	0	0	0	0	0	0	0	0	0	2	67	25.6	27.4	8.3	9	65	77	1.2	3	12	15	22	25	9	12	7.2	7.3	97	103	0.7	0.9	136	195	130	134	3.5	3.9	0.9
0	1	1	5	14	6	5	3	0	0	0	0	0	0	0	0	0	0	0	0	0	4	59	25.9	32.2	8.5	10.9	424	473	6.8	7.5	20	20	27	27	27	27	8.4	8.4	97	97	5.7	5.7	72	72	139	139	4.8	4.8	1.6
0	0	1	3	10	6	1	3	0	0	0	0	0	0	0	0	0	0	0	0	0	5	54	30.8	34.5	10.7	11.8	137	220	4.9	7.4	12	14	27	29	5	8	8.3	8.5	100	103	0.4	0.5	103	107	137	140	3.9	4.1	1.3
0	0	1	5	9	5	1	3	0	0	0	0	0	0	0	0	0	0	0	0	0	2	66	29.9	33.5	9.2	10.3	208	227	10.4	10.8	16	17	29	31	19	27	9	9.1	94	95	2.9	3.9	107	170	136	138	3.8	4	1.4
0	0	1	5	3	1	1	1	0	0	0	0	0	0	0	0	0	0	0	0	0	10	84	26.4	31.5	9.1	10.6	158	196	6.6	19.7	11	13	21	29	14	17	8.1	9.1	95	106	0.7	0.7	75	107	131	135	3.7	4.9	1.2
0	0	4	6	12	5	4	3	1	0	0	0	0	0	0	0	0	0	0	0	0	4	81	25.7	34.6	9.2	12.1	110	172	9	14.2	10	12	27	28	13	14	8.3	8.3	101	105	0.7	0.7	73	73	138	140	3.4	4	1.3
0	0	1	5	6	4	1	1	1	1	1	0	0	1	0	0	0	0	0	0	0	33	66	29.7	40.1	9.9	11.9	289	316	10.2	11.8	12	15	25	26	8	8	8	8.3	103	109	0.5	0.6	152	181	135	144	4.5	4.8	1.2
1	0	1	3	14	6	4	4	0	0	0	0	0	0	0	0	0	0	0	0	0	2	59	28.3	30.7	9.1	9.9	201	253	18.5	18.5	10	14	30	33	10	10	7.7	8.1	98	98	0.2	0.3	119	146	138	139	3.2	3.3	1.2
0	1	1	2	15	6	5	4	1	1	0	0	0	0	0	0	0	0	0	0	0	4	75	17.4	34.6	6.1	11.8	72	171	4.8	11.5	9	14	21	25	23	26	7.6	8	106	107	0.9	1	230	239	136	137	4.4	4.9	1.8
0	0	1	4	14	6	5	3	0	0	0	0	0	0	0	0	0	0	0	0	0	9	64	25.7	34.5	8.5	11.3	93	111	12.7	15	10	16	20	23	28	30	8.7	8.7	108	109	0.8	0.9	118	141	138	141	3.4	4.2	0.9
0	1	4	6	3	1	1	1	0	2	1	0	0	1	0	0	0	0	0	0	0	13	79	37.8	40.7	11.9	13.1	175	197	10.8	19.9	12	16	17	19	40	43	7.2	7.7	112	114	1.9	2.1	137	162	137	144	4.1	4.6	1.8
0	0	4	6	13	6	3	4	0	0	0	0	0	0	0	0	0	0	0	0	0	3	90	25.1	26.7	8	8.3	172	212	16.3	19.4	19	19	20	20	33	33	8	8	99	99	3.4	3.4	250	250	138	138	4.2	4.2	2.1
0	0	3	2	15	6	5	4	0	0	0	0	0	0	0	0	0	0	0	0	0	2	25	28.4	31.8	9.7	11	298	360	11.5	11.9	11	12	31	31	6	7	7.9	8.6	100	102	0.6	0.7	78	93	139	140	3.8	4.3	0.8
0	0	1	5	15	6	5	4	0	0	0	0	0	0	0	0	0	0	0	0	0	8	70	22.4	26.5	7.2	8.4	356	424	12.7	25.3	11	17	20	25	18	23	8	8.6	99	102	0.6	0.9	88	217	132	135	3.7	5.2	1.4
1	0	2	4	5	1	1	3	0	0	0	0	0	0	0	0	0	0	0	0	0	61	42	31.9	38.9	10.6	12.7	267	322	13.8	15.4	16	19	18	22	18	28	7.4	8.1	105	108	1.7	2.2	142	192	138	144	4	5.9	2.3
1	1	1	7	14	6	5	3	1	2	0	0	0	0	0	0	0	0	0	0	0	3	76	26.8	26.8	7.8	7.8	190	190	5.9	5.9	21	24	20	23	77	80	8.7	9.9	100	102	5.6	5.8	114	124	138	142	5	5.9	1.1
0	1	4	6	3	1	1	1	0	0	0	0	0	0	0	0	0	0	0	0	0	2	69	26.5	32.8	8.8	10.8	226	296	9.4	17.6	9	14	18	22	45	49	8.1	8.1	104	105	1.4	1.4	95	95	135	135	4.9	4.9	1.5
0	0	1	2	14	6	5	3	0	0	0	0	0	0	0	0	0	0	0	0	0	4	90	26.6	27.1	8.1	8.2	211	237	9.2	9.4	14	19	30	32	38	38	6.8	7	85	87	1.5	1.6	75	83	129	130	3.8	4.3	1.8
0	1	1	4	15	6	5	4	0	0	0	0	0	0	0	0	0	0	0	0	0	5	36	22.3	24.1	7.8	8.4	104	107	12.5	18.1	17	20	19	20	66	71	8	8.2	106	109	4.1	4.2	141	158	140	141	4.7	4.8	1
0	0	1	11	13	6	4	3	0	1	0	0	0	1	0	0	0	0	0	0	0	4	65	36.8	36.8	9.9	9.9	370	370	11	11	22	25	19	22	80	85	9	9	92	96	2.2	2.4	165	180	129	136	4.9	6.9	1.4
0	0	1	7	14	6	5	3	0	1	0	0	0	0	0	0	0	0	0	0	0	8	37	21.7	24.1	6.7	7.4	65	81	5	5.5	19	22	16	16	75	79	8.6	8.9	95	99	3.3	3.4	103	107	129	130	4.3	4.4	0.9
0	0	1	3	6	4	1	1	0	0	0	0	0	0	0	0	0	0	0	0	0	3	84	35.2	37.8	12.6	12.9	198	261	9.9	14.1	12	14	24	27	15	21	8.8	9.1	105	107	0.7	0.9	142	181	139	143	3.9	5.4	1
1	0	2	5	9	5	2	2	0	0	0	0	0	1	0	0	0	0	0	0	0	4	74	34.1	46.2	11.9	15	427	553	13.3	15.4	12	22	23	30	40	45	7.4	10.1	96	109	1.2	1.7	118	197	137	143	3.8	8.5	1.7
0	1	1	4	7	4	1	2	0	1	0	0	0	0	0	0	0	0	0	0	0	12	31	32.6	40	11.4	13.5	195	269	8.1	13.5	15	15	20	20	8	12	8.1	8.1	105	107	0.9	1.1	129	129	136	137	4	4.2	1.4
0	0	2	2	4	1	1	2	0	0	0	0	0	0	0	0	0	0	0	0	0	19	84	22.8	24.2	6.7	7.5	187	200	7.8	7.8	11	12	24	30	58	59	7.4	8.6	103	114	0.8	0.8	94	115	140	145	3.4	5.2	1
0	1	1	3	8	5	1	2	0	1	0	0	0	0	0	0	0	0	0	0	0	3	57	23.6	41.5	11.1	14.2	168	211	6.2	14	11	13	23	27	12	14	7.7	7.7	105	107	0.8	0.8	114	226	139	139	3.6	3.8	1.2
0	0	1	4	15	6	0	3	0	1	0	0	0	1	0	0	0	0	0	0	0	2	76	22.2	29.5	6.8	9	213	398	10.2	14.6	16	19	16	18	24	26	8.3	8.6	99	105	2	2.4	106	127	135	137	4.2	5	0.6
0	0	4	2	14	6	5	3	2	0	0	0	0	0	0	0	0	0	0	0	0	2	74	28.2	39.4	9.3	12.6	114	144	5.1	14.7	10	13	24	30	12	16	9.7	9.8	97	108	0.5	0.9	92	94	138	144	3.9	3.9	0.6
0	1	4	3	9	5	2	2	0	1	0	0	0	0	0	0	0	0	0	0	0	2	38	43.9	43.9	15.7	15.7	275	275	10.4	10.4	15	15	28	28	10	10	9.3	9.3	101	101	0.9	0.9	101	101	140	140	3.8	3.8	2
0	1	4	2	8	5	1	2	0	0	0	0	0	0	0	0	0	0	0	0	0	2	34	22.2	36.7	8.1	12.7	131	287	4.7	19.2	6	7	24	26	12	16	7.3	8.1	111	114	0.5	0.8	120	165	139	141	3.8	4.1	0.7
1	0	1	6	3	1	1	1	0	0	0	0	0	0	0	0	0	0	0	0	0	6	79	22.4	35.1	7.5	11.7	76	170	9.2	17.5	17	28	14	21	47	52	7.8	8.4	103	111	2.6	3.1	140	200	139	146	3.8	5.5	2.6
1	1	3	6	3	1	1	1	0	0	0	0	0	0	0	0	0	0	0	0	0	13	63	34.2	38	10.8	11.4	271	344	3.6	16.2	17	22	26	39	51	55	7.3	7.3	92	100	2.1	2.5	88	99	139	149	3.4	4.1	3.6
0	0	1	2	14	6	4	4	1	1	0	0	0	0	0	0	0	0	0	0	0	2	43	20.7	29.7	7.7	10.4	118	164	9	11.8	11	23	17	29	10	20	8.2	9	104	106	0.9	1.4	145	180	139	141	3.9	5.3	4.3
1	1	1	4	3	1	1	1	0	2	0	0	0	0	0	0	0	0	0	0	0	3	61	30.5	37.2	9.9	12.1	373	554	14	29.4	14	19	18	24	9	23	7.6	9.4	99	106	0.6	0.8	135	177	135	138	4.3	4.9	2.1
0	0	1	4	14	6	5	3	1	0	0	0	0	0	0	0	0	0	0	0	0	2	80	24.2	31.1	8.1	10.7	184	244	3.8	8.5	11	13	22	25	17	24	7.8	8.9	108	113	0.8	0.9	73	79	136	142	4.2	5	1
0	0	1	5	12	5	5	1	2	0	0	0	0	0	0	0	0	0	0	0	0	2	71	25.2	29	8.6	10.6	81	164	5.5	13.7	9	10	21	21	11	14	7.5	7.5	111	113	0.7	0.9	66	87	137	139	4.3	5.2	0.7
0	1	1	5	3	1	1	1	0	0	0	0	0	0	0	0	0	0	0	0	0	6	71	26.6	34.4	9.1	12.5	109	147	10.7	12.5	9	15	18	24	29	43	7.3	8.6	104	114	1	1.7	93	243	136	140	4.5	6.5	0.9
1	1	3	4	3	1	1	1	0	0	0	0	0	0	0	0	0	0	0	0	0	8	58	45.9	46.6	15.8	16.4	289	298	10.5	11.3	15	15	24	25	12	15	9.2	9.3	93	95	0.5	0.5	97	100	132	135	4.5	4.5	1.5
0	1	4	5	10	6	1	3	1	0	0	0	0	0	0	0	0	0	0	0	0	3	75	25.1	32.4	8.5	11.1	97	143	7.4	8.3	9	12	21	22	19	21	8.5	8.5	106	113	0.9	0.9	149	149	137	139	4.2	5.1	1.3
0	0	2	4	8	6	1	1	0	0	0	1	0	1	0	0	0	0	0	0	0	2	51	36	36	11.4	11.4	313	313	10.1	10.1	17	17	26	26	13	13	9.4	9.4	98	98	0.7	0.7	148	148	141	141	5	5	2
0	0	1	4	14	6	5	3	0	0	0	0	0	0	0	0	0	0	0	0	0	2	54	30.7	30.9	10.2	10.4	21	23	30.7	33.1	12	16	27	32	23	28	8.2	8.3	98	102	0.8	0.9	86	95	138	140	3.5	4.4	1.1
0	0	1	4	13	6	4	3	0	1	0	0	0	1	0	0	0	0	0	0	0	5	79	31.5	31.5	9.8	9.8	115	115	13.5	13.5	25	25	21	21	59	59	8.6	8.6	94	94	5.4	5.4	205	205	135	135	4.7	4.7	1.1
1	1	1	4	8	4	1	3	1	1	0	0	0	0	0	0	0	0	0	0	0	7	81	28.4	28.4	8.7	8.7	77	77	33.3	33.3	10	16	22	23	50	55	7.4	7.4	110	110	1.7	1.8	105	158	139	143	4.3	5.2	1
0	1	4	3	15	6	0	3	0	0	0	0	0	0	0	0	0	0	0	0	0	5	50	31.9	35.1	11.4	12.2	182	187	10.4	12.5	14	15	22	23	20	21	6.7	6.8	105	106	1.6	1.8	125	129	136	139	4	5.7	1.2
0	0	1	4	8	5	1	2	0	1	0	0	0	1	0	0	0	0	0	0	0	5	63	32.5	41	10.2	12.2	77	90	12.1	16.7	12	21	12	17	87	113	7.3	7.9	123	135	2.5	3	99	382	152	167	4.2	4.8	1.9
1	1	4	2	3	1	1	1	0	0	0	0	0	0	0	0	0	0	0	0	0	2	50	39	45.3	14	15.4	212	235	9.6	10.3	13	15	25	26	10	13	8.2	8.6	103	104	0.9	1	108	115	138	141	3.2	3.7	2.5
0	0	4	8	13	6	4	3	0	0	0	0	0	0	0	0	0	0	0	0	0	10	66	26.2	38.6	9.1	13.5	312	446	18.4	20	16	18	15	16	39	65	7.3	7.5	108	113	1.2	2.2	184	273	137	142	3.4	3.7	1.1
0	1	4	3	14	6	4	4	0	0	0	0	0	0	0	0	0	0	0	0	0	14	35	43.9	53.2	14	17.6	188	272	4.6	9.2	12	21	9	18	11	18	5.2	8.1	99	111	0.9	2.4	162	178	130	139	5.2	6.4	3.2
0	1	1	3	15	5	0	1	1	0	0	0	0	0	0	0	0	0	0	0	0	3	68	26.2	26.8	9.5	9.9	124	134	7.6	8.3	10	10	24	24	12	13	8.7	7.9	109	112	0.9	0.9	54	54	139	139	4.3	4.5	2.1
0	1	1	6	13	6	4	3	0	1	0	0	0	0	0	0	0	0	0	0	0	20	30	41.7	41.7	12.6	12.6	178	178	8.6	8.6	14	16	34	36	21	22	8	8.6	94	95	3.3	3.8	89	90	140	141	3.7	4.2	1.5
0	0	1	3	14	6	5	3	0	0	0	0	0	0	0	0	0	0	0	0	0	5	88	36.4	46	10.5	13.5	185	278	4.9	8.8	11	15	31	40	24	24	8.3	9	86	94	0.9	1	120	184	135	140	4.4	5.6	0.7
0	1	1	3	9	4	1	4	0	0	0	0	0	0	0	0	0	0	0	0	0	3	71	35.9	37.3	12.2	12.4	205	243	9.5	15.4	15	17	24	26	27	30	8.9	9.5	107	109	1.8	1.9	156	380	144	147	3.3	4	1.8
1	0	1	2	3	1	1	1	0	0	0	0	0	0	0	0	0	0	0	0	0	6	83	34.9	37.9	11.3	12	436	468	17.1	19.4	17	19	17	21	38	46	8.5	8.6	96	100	1.6	1.8	188	296	129	131	4.2	5.1	2.2
1	0	1	6	15	1	0	1	0	0	0	0	0	0	0	0	0	0	0	0	0	2	70	26.9	32	8.8	10.9	379	476	20.5	32.4	16	20	18	28	34	43	7.2	7.8	98	100	2.5	2.8	150	281	130	138	3.5	4.6	1.8
0	1	1	4	9	5	1	3	0	0	0	0	0	0	0	0	0	0	0	0	1	22	68	26.5	29.3	9.1	10.1	164	197	11	12.1	16	23	20	29	46	65	8.1	8.9	91	98	2.5	4	192	325	133	138	4.7	5.6	1.3
0	1	1	5	14	6	4	4	0	1	0	0	0	0	0	0	0	0	0	0	0	2	68	31.5	34.6	10.7	12.7	213	244	6.3	9.9	9	15	20	23	21	29	7.6	8.4	102	107	1.4	1.6	89	329	138	139	3.8	4.5	0.9
1	0	1	6	7	5	1	1	0	1	0	0	0	1	0	0	0	0	0	0	0	4	90	33.7	33.7	10.3	10.3	173	173	14.2	14.2	16	16	20	20	56	56	7.8	7.8	111	111	1.5	1.5	246	246	142	142	4.6	4.6	1.9
0	1	1	3	15	6	5	4	0	0	0	0	0	0	0	0	0	0	0	0	0	2	71	20.9	25.2	6.5	8.3	106	185	25.3	32.6	13	19	27	31	62	74	7.9	8.5	93	100	1.5	1.9	105	190	134	139	4.4	5.1	1.8
1	1	1	4	3	1	1	1	0	0	0	0	0	0	0	0	0	0	0	0	0	4	68	41	47.2	14.3	16.4	211	233	13.5	15.8	11	23	21	26	18	24	8.3	10	102	108	0.5	1.1	135	271	140	144	3.5	4.6	5.3
0	1	1	11	3	1	1	1	2	1	0	0	0	0	0	0	0	0	0	0	0	8	59	16.5	29.5	5.8	10.9	44	122	2.1	4.9	9	15	27	31	10	27	7.4	10.5	105	111	0.5	1.2	109	252	144	147	3.6	4.3	1.7
0	0	1	6	15	1	0	1	1	0	0	0	0	0	0	0	0	0	0	0	0	4	67	21.7	42	7	13.4	125	271	12.6	17.6	11	16	24	27	13	23	7.5	7.9	102	107	0.6	0.8	126	155	139	144	4.2	5.1	1.4
0	0	1	4	13	6	4	3	0	0	0	0	0	0	0	0	0	0	0	0	0	4	51	25	28.5	8.8	9.3	100	230	12.2	21.8	21	29	10	21	27	29	6.6	7.1	96	101	1.2	1.3	152	304	132	134	4.9	5.7	3.1
1	0	1	2	10	6	1	3	2	1	0	0	0	0	0	0	0	0	0	0	0	17	74	23.6	35.2	7.8	12.3	64	204	3.6	5.4	12	15	16	19	13	17	6.8	7.7	113	115	0.7	1.1	77	170	138	142	3.6	5.6	2.6
0	0	1	3	15	6	0	4	0	0	0	0	0	0	0	0	0	0	0	0	0	2	30	20.6	30.3	7.1	10.4	103	250	11	24	8	12	18	20	7	9	7.3	8.7	109	113	0.4	0.7	99	111	138	141	4	5.8	1.4
0	1	1	9	6	3	1	2	1	1	0	1	0	1	0	0	0	0	0	0	0	4	74	37	42.1	11.9	13.9	159	225	8	29	9	21	15	27	22	49	8.3	9.2	105	113	0.7	1.4	100	372	141	146	3.6	5.5	1.7
0	1	1	10	3	1	1	1	0	0	0	0	0	0	0	0	0	0	0	0	0	5	67	25.3	35.4	8	11.4	161	200	16.6	28.8	11	15	23	25	30	33	8.6	8.6	97	100	5.6	6.6	130	130	135	135	4	5.2	1.2
0	0	1	3	8	5	1	2	0	0	0	0	0	0	0	0	0	0	0	0	0	33	54	28.2	31.3	10.3	10.6	225	319	2.2	5.2	13	15	19	25	8	22	6.5	8.3	98	106	0.6	0.8	86	96	132	136	4.1	4.5	1.3
0	1	1	2	13	5	4	4	0	1	0	0	0	1	0	0	0	0	0	0	0	2	75	31.1	31.3	10	10	190	219	14.2	15.7	14	14	22	22	39	40	8.6	8.6	109	109	1.3	1.5	132	134	145	145	4.3	4.4	1.7
0	0	1	6	14	6	4	4	0	0	1	0	0	0	1	0	0	0	0	0	0	4	90	35.5	36.6	11.6	11.9	134	145	19.2	36.5	19	20	17	19	34	39	7.9	7.9	102	104	2	2	88	99	135	137	3.3	4	1.1
0	0	1	2	12	5	4	3	0	0	0	0	0	0	0	0	0	0	0	0	0	2	79	28.7	32.7	9.2	10.2	164	219	3.2	5.2	12	12	30	30	27	27	7.9	7.9	101	103	2.3	2.3	88	89	138	140	5.2	5.4	0.6
0	0	1	2	13	6	4	3	0	0	0	0	0	0	0	0	0	0	0	0	0	6	84	25.5	30.3	8.7	8.7	163	163	9.3	9.3	15	16	22	24	12	13	8.2	8.7	99	101	0.9	0.9	135	214	133	136	3.9	4.2	2.3
1	1	4	2	6	4	1	1	0	0	0	0	0	0	0	0	0	0	0	0	0	6	61	31.8	42.4	10.8	14.8	226	302	12.8	16.8	13	17	22	26	16	20	8.3	9	96	107	1.2	1.4	186	310	133	145	3.6	4.9	1.4
0	0	1	3	14	6	4	4	1	0	0	0	1	1	0	0	0	0	0	0	0	2	68	23.6	26.7	7.4	8.3	70	95	3.9	6.2	11	13	20	23	34	36	7.7	7.7	110	112	1.5	1.9	92	260	138	141	4.5	5	1.1
0	1	1	6	15	6	5	4	0	0	0	0	0	0	0	0	0	0	0	0	0	3	58	34.2	43.6	11.5	14.7	164	248	13.1	29.2	13	18	18	21	13	15	8.6	9.3	106	106	1	1	162	162	140	140	3.9	5.1	1.6
0	0	1	2	11	5	4	2	0	0	0	0	0	0	0	0	0	0	0	0	0	4	80	31.5	31.5	9.7	9.7	226	226	47.6	47.6	21	25	11	18	46	49	8.2	8.4	102	104	1.8	1.8	277	319	139	143	3	3.8	1.5
0	0	4	2	10	6	1	3	0	0	0	0	0	0	0	0	0	0	0	0	0	3	58	42.7	44	13.9	14.3	293	304	20.1	22	16	19	22	23	10	11	8.9	9.4	104	105	0.5	0.5	133	183	139	143	3.1	3.8	1.8
0	1	1	4	13	6	4	3	1	0	0	0	0	0	1	0	0	0	0	0	0	2	79	33.5	33.5	11.8	11.8	216	216	14.5	14.5	13	17	14	17	45	51	8.4	8.4	112	113	1.6	2	46	375	139	140	3.9	4.1	1.6
0	1	1	3	15	6	5	4	2	0	0	0	0	0	0	0	0	0	0	0	0	3	69	38.9	41.5	12.6	13.5	115	135	11.9	16.7	10	12	29	30	28	29	8.3	8.4	92	98	0.6	0.6	94	102	134	138	4	4.2	1.8
0	0	1	3	15	6	5	4	1	0	0	0	0	0	0	0	0	0	0	0	0	2	53	21.9	33.7	7	10.9	163	297	5.5	12	7	13	22	27	7	13	7.9	8.2	107	117	0.4	0.7	96	252	138	143	3.3	4.5	1.7
0	0	1	6	8	4	1	3	1	1	0	0	0	1	0	0	0	0	0	0	0	5	68	25.4	26.7	8.8	8.8	200	305	11	17.8	9	14	21	22	13	15	8.7	9	103	104	0.6	0.7	113	192	131	134	3.8	4.4	1.3
1	1	4	3	14	6	5	3	0	2	0	0	0	0	0	0	0	0	0	0	0	2	56	32.4	39.2	11.3	13.1	36	56	27.7	32.1	17	21	22	25	49	57	7.7	8.6	78	88	0.7	1.6	124	335	119	125	3.7	4.1	2.8
1	0	2	3	11	6	3	2	0	0	0	0	0	0	0	0	0	0	0	0	0	6	49	25.4	30.4	8.5	9.9	63	100	7.7	10.3	9	13	16	17	20	24	6.1	6.4	118	119	0.8	0.9	116	122	141	144	3.4	3.6	2.1
0	0	4	6	10	6	1	3	0	1	0	0	0	1	0	0	0	0	0	0	0	7	69	32.4	32.4	10.9	11.2	229	259	11.1	12.7	18	22	18	24	92	100	8.1	8.4	100	101	4.7	5.2	68	91	135	138	4.8	5.8	1.3
1	0	1	4	13	6	4	3	0	1	0	0	0	0	0	0	0	0	0	0	0	14	83	37	40.3	11.9	13.2	202	247	13.1	17.4	12	14	21	21	15	18	7.6	7.6	99	101	0.4	0.6	134	151	134	134	3.8	4.2	1.1
0	1	1	12	4	1	1	2	1	0	0	0	0	1	0	0	0	0	0	0	0	13	61	38.2	41	13	14.2	108	142	13.4	20.5	11	17	15	19	40	41	7.4	7.7	106	111	3.2	3.6	60	223	131	139	4.7	5.9	1
0	1	1	6	14	6	4	4	1	0	0	0	0	0	0	0	0	0	0	0	0	5	73	28.9	32.4	10	11.1	299	324	14	17.8	10	12	24	26	26	29	7	7.5	105	106	0.7	0.8	131	195	137	138	3.7	4.1	0.8
0	1	1	6	6	1	1	4	0	0	0	0	0	1	0	0	1	1	0	0	0	12	55	24.6	24.8	8.4	8.5	260	300	5.1	5.6	13	16	18	22	50	64	7.8	8.5	114	119	1.2	1.4	84	108	146	148	3.1	4.7	0.8
0	0	4	2	15	6	5	4	0	0	0	0	0	0	0	0	0	0	0	0	0	2	36	31.3	34.4	9.3	10.1	311	325	11.8	14	11	13	16	17	8	8	7.2	7.7	105	107	0.4	0.6	143	175	132	137	4	4.4	1.6
0	0	1	2	9	5	1	3	0	0	0	0	0	0	0	0	0	0	0	0	0	2	79	42.5	44.1	14.5	15.2	175	180	8.3	10.8	16	16	25	25	11	12	9	9	106	106	0.8	0.9	100	110	143	143	3.6	3.6	0.9
0	0	1	2	14	6	4	4	0	0	1	0	0	1	0	0	0	0	0	0	0	2	44	32.8	35.5	11.7	12.5	187	194	10.6	12.3	8	11	20	22	7	8	6.6	7.8	111	112	0.5	0.5	81	114	137	139	3.7	4.7	2.4
0	1	1	2	10	6	1	3	0	1	0	0	0	1	0	0	0	0	0	0	0	28	59	26.7	38.6	8.4	11.8	277	364	4.7	14.5	17	25	11	22	10	19	7	8	100	104	1	2	49	90	136	140	3.9	5.1	6.6
0	1	3	2	14	6	4	4	0	0	0	0	0	0	0	0	0	0	0	0	0	2	41	33.8	43.2	12.5	14.1	124	217	8	10.6	14	19	15	20	13	27	6.2	7.9	111	120	1.1	1.8	82	206	145	152	3.8	5.4	2
0	0	1	2	14	6	4	4	1	0	0	1	0	0	0	0	0	0	0	0	0	6	78	30.4	31.6	9.3	9.4	350	432	13.9	16.5	11	12	31	32	25	28	8.9	9	95	97	0.9	0.9	129	142	138	140	5	5	0.7
0	0	4	2	9	6	1	2	0	0	0	0	0	0	0	0	0	0	0	0	0	5	64	31.3	37.9	10.5	12.9	309	360	12.1	14.7	12	15	21	26	15	24	7.9	9.1	105	105	0.8	1	120	137	135	139	3.9	5.8	1.6
0	1	1	2	13	6	4	3	0	1	0	0	0	0	0	0	0	0	0	0	0	2	90	26.4	26.9	8.8	8.9	239	248	8.8	11.4	12	13	24	24	41	45	8.4	8.5	108	110	1.8	1.8	115	124	140	141	4.9	5.1	1.6
1	0	1	3	12	5	4	3	0	1	0	0	0	0	0	0	0	0	0	0	0	6	50	33.8	33.8	11	11	194	194	18.1	18.1	15	15	23	23	6	6	8.4	8.4	104	104	0.4	0.4	150	150	139	139	3.4	3.4	2.2
0	0	1	5	13	6	4	3	0	0	0	0	0	0	0	0	0	0	0	0	0	5	51	22	30.2	7.4	10.4	100	156	4.6	5.8	20	20	18	18	7	7	7.4	7.4	97	97	0.4	0.4	99	99	135	135	3.7	3.7	2.5
0	0	3	2	10	5	2	3	0	1	0	0	0	1	0	0	0	0	0	0	0	9	79	30.7	41.6	9.8	13.1	178	234	15.2	26.7	18	23	19	21	42	44	8.3	8.8	93	103	2.1	2.7	208	538	125	138	4.4	8	2.2
0	1	1	3	14	6	5	3	0	0	0	0	0	0	0	0	0	0	0	0	0	4	82	33	33	10.6	10.6	99	99	12.7	12.7	16	16	25	25	45	45	7.2	7.2	104	104	1.1	1.1	148	148	140	140	4.7	4.7	1.3
0	0	1	7	6	4	1	1	0	2	0	0	0	1	1	0	0	0	0	0	0	7	18	27	27.3	8.3	9.1	43	75	4.6	28.3	15	16	15	18	21	28	7.1	7.6	111	115	1.1	1.6	109	158	140	142	3.5	4.2	1.1
0	0	3	2	8	5	2	1	0	0	0	0	0	0	0	0	0	0	0	0	0	5	56	17.4	27.5	5.6	9.4	172	275	7	10.5	18	19	23	25	107	111	8.1	8.6	104	107	5.6	5.9	80	172	141	146	3.7	3.8	0.8
0	1	4	3	11	5	2	4	0	0	0	0	0	0	0	0	0	0	0	0	0	2	72	41.1	42.4	13.3	13.8	117	126	9.7	13.1	11	15	19	22	20	22	7.4	8	118	119	0.7	0.8	145	414	150	153	3.7	4.3	3.3
0	1	1	3	12	6	3	3	0	0	0	0	0	0	0	0	0	0	0	0	0	6	36	40.5	40.5	13.4	13.4	54	54	5.4	5.4	20	20	22	22	3	9	8.8	8.8	102	102	0.6	0.6	100	100	141	149	3.4	4.2	1.7
0	0	1	8	3	1	1	1	1	0	0	0	0	0	0	0	0	0	0	0	0	3	88	24.7	31	8.6	10.9	147	203	14.5	21.2	12	13	22	22	24	25	9.6	9.9	104	109	0.6	0.8	85	85	135	139	4.3	4.8	1.4
1	0	1	4	3	1	1	1	0	0	0	0	0	0	0	0	0	0	0	0	0	4	81	26.6	32	7.9	9.5	519	618	15.9	19.1	13	17	19	23	14	19	7.1	7.3	104	107	1	1.2	125	216	134	138	3.6	3.8	1.5
0	1	1	2	12	5	5	2	0	1	1	0	0	1	0	0	0	0	0	0	0	3	87	27.9	32.5	8.5	9.7	385	385	9.8	11	15	17	13	13	56	59	7.2	7.4	100	111	1.5	1.6	146	177	125	134	4.9	5	1.2
0	0	4	2	11	6	1	4	0	2	1	0	0	1	1	0	0	0	0	0	0	2	56	27	32	8.4	9.9	302	326	10.1	14.6	13	21	16	20	14	33	6.7	8	109	118	0.7	1.3	85	135	142	147	2.8	4.3	1.4
1	1	2	6	8	5	1	1	0	0	0	0	0	0	0	0	0	0	0	0	0	2	73	18.3	28.2	6	8.4	9	57	0.6	1	13	21	9	18	24	27	7.3	8.1	107	112	1	1.4	104	119	134	140	3.4	4.4	3.5
0	1	1	2	14	6	5	3	0	0	1	0	0	0	0	0	0	0	0	0	0	4	69	26	35.9	10.2	12.6	180	219	15.6	19.4	10	16	31	36	34	37	7.8	8.6	91	95	1.5	1.9	25	341	133	137	3.7	4.7	0.7
0	0	1	4	11	4	3	4	0	0	1	0	0	0	0	0	0	0	0	0	0	7	54	25.1	27.1	7.9	8.6	216	251	9.5	13.4	11	14	18	20	10	10	7.9	8	115	116	0.6	0.8	119	131	143	143	4	4.4	1
0	0	4	4	15	6	5	4	0	0	0	0	0	0	0	0	0	0	0	0	0	2	64	25	25.3	8.1	8.2	154	160	7.5	7.8	16	21	26	30	18	59	8.7	10.6	91	95	3.4	7.3	94	247	132	138	3.4	6	0.9
0	0	1	2	8	5	1	2	0	1	0	0	0	0	0	0	0	0	0	0	0	11	25	28.1	32.4	9.7	11.2	149	279	9.8	15.4	10	15	19	25	6	11	5.8	8.3	107	111	0.4	0.7	112	163	138	142	3.2	4	2.4
0	1	1	2	15	6	5	4	0	1	0	0	0	0	0	0	0	0	0	0	0	3	76	29.7	35.8	10.1	11	158	183	10.2	12.2	12	12	26	26	14	14	7.7	7.7	103	103	0.8	0.8	102	102	138	138	3.3	3.3	1.2
0	1	1	5	13	6	5	2	1	1	0	0	0	0	1	0	0	0	0	0	0	2	78	29.4	34.3	9.3	10.6	140	220	9	11.9	11	18	22	25	25	27	8.2	8.3	106	108	1.5	1.6	90	117	140	141	4.4	4.7	1.6
1	1	1	4	14	6	5	3	0	1	0	0	0	0	1	0	0	0	0	0	0	3	72	31.1	36.1	9.6	11.4	302	381	10.1	13.5	12	23	15	20	82	100	7.1	9.8	101	109	6	7.2	108	222	133	138	3.7	4.3	0.8
1	1	2	3	3	1	1	1	0	1	0	0	0	0	0	0	0	0	0	0	0	15	75	43.3	45	13.6	13.6	114	137	7.6	9.6	14	16	23	24	11	12	8.2	8.3	102	104	1	1	92	124	137	138	4.2	4.4	1.5
0	1	4	3	15	6	5	4	0	0	0	0	0	0	0	0	0	0	0	0	0	4	39	33.8	42.2	11.4	14.1	162	231	8.4	15.2	10	12	24	25	14	15	9.3	9.6	103	105	1.3	1.5	122	196	139	140	4.2	4.4	0.8
0	0	4	8	13	6	4	3	1	0	0	0	0	0	0	0	0	0	0	0	0	3	81	24.6	38.7	8.5	13.8	127	297	8.2	21.3	12	20	21	24	19	37	9.4	9.4	94	105	3.8	6	98	99	134	135	4.2	5.2	1.8
0	0	1	8	14	6	5	3	0	0	0	1	0	0	0	0	0	0	0	0	0	8	82	36.5	36.9	11.9	12	147	162	10.3	12.2	19	20	25	27	41	45	8.6	8.8	96	97	5.2	5.9	81	100	142	142	3.8	3.9	1.4
0	1	4	2	15	5	0	3	1	0	0	0	0	0	0	0	0	0	0	0	0	2	63	28.8	36.5	9.8	12.3	201	237	7.8	20.4	12	17	23	24	19	22	8.2	9.3	102	107	1.3	1.4	133	155	136	139	4.2	4.8	1.6
0	0	1	3	14	5	5	4	0	0	0	0	0	0	0	0	0	0	0	0	0	3	92	28.4	35.9	9.3	12.5	79	119	3.4	3.8	14	15	22	26	12	19	8	9.9	105	112	0.8	0.8	71	94	141	145	3.5	4.1	2.9
0	0	4	2	8	5	1	2	0	0	0	0	0	0	0	0	0	0	0	0	0	18	85	16.6	22.6	5.5	7.6	145	269	10.4	16.5	10	20	13	18	21	23	7.7	8.9	112	117	1.6	1.8	90	359	144	145	3.6	4.4	1.3
0	1	1	2	9	5	2	2	2	0	0	0	0	0	0	0	0	0	0	0	0	3	82	31.3	38.6	11.1	13.3	145	180	7.7	11.5	9	10	24	25	9	10	8.4	8.4	112	112	0.6	0.7	77	77	141	142	4.2	4.9	1.4
0	0	1	3	14	6	4	4	0	1	0	0	0	0	0	0	0	0	0	0	0	8	87	39.1	44.2	13	14.7	103	154	6.2	24.6	13	17	19	23	27	31	7.1	7.6	104	109	1.4	1.6	119	149	138	139	3.9	5.3	1.7
0	0	1	2	14	6	5	3	0	0	0	0	0	0	0	0	0	0	0	0	0	3	57	25.8	28.2	8.5	9.3	274	274	10.5	11	11	11	28	28	9	9	8.2	8.2	98	98	0.5	0.5	90	90	137	137	4	4	1
0	1	3	4	3	1	1	1	0	0	0	0	0	0	0	0	0	0	0	0	0	17	44	37.6	38.6	12.5	12.9	128	152	6.8	7.2	8	13	23	25	11	12	8.1	8.2	106	109	0.4	0.5	56	188	135	141	3.5	3.6	1.6
0	1	1	2	6	4	1	1	0	0	0	0	0	0	0	0	0	0	0	0	0	3	71	37.4	40.6	12.8	13.8	259	293	9	9.7	14	15	24	28	13	15	9.3	9.9	101	103	0.9	0.9	115	176	137	140	4	4.3	2.1
0	1	1	6	13	6	4	3	1	1	0	0	0	1	0	0	0	0	0	0	0	3	87	26.8	27.9	8.7	9.1	61	69	21	30.9	16	17	16	18	49	55	7.2	7.4	107	109	3.1	3.2	70	73	141	142	4.6	4.7	2.6
1	1	2	5	12	6	2	4	0	2	0	0	0	1	1	0	0	0	0	0	1	11	75	33.1	42.6	10.8	13.8	437	589	7.4	27.5	15	19	12	21	15	27	7.2	8.9	92	103	1	2.7	135	164	128	134	5.5	8.9	3.4
0	1	1	5	15	6	5	4	0	0	0	0	0	0	0	0	0	0	0	0	0	2	52	32.3	34.7	10.4	11.3	48	58	3.5	3.9	12	15	21	26	17	22	8.5	9.3	103	104	0.6	0.7	74	154	135	137	4.4	5.2	2.1
0	0	1	2	15	6	5	4	1	0	0	0	0	0	0	0	0	0	0	0	0	2	73	33.1	33.4	9.8	10	143	146	16.1	16.7	11	12	23	25	7	8	8.2	8.2	109	111	0.5	0.6	115	115	141	142	4.3	4.4	0.9
0	1	1	4	6	1	1	4	2	1	0	0	0	0	0	0	0	0	0	0	0	15	64	24.7	35.8	8.5	12	357	475	16.4	19.6	8	11	28	30	16	21	7.1	8	104	106	0.7	1	122	251	139	142	3.1	4.1	1.5
0	1	1	2	15	6	5	4	3	0	0	0	0	0	0	0	0	0	0	0	0	2	57	25.3	35.4	8.3	11.5	179	209	12.2	19.3	9	10	25	28	11	11	7.7	7.7	105	113	0.7	0.7	111	147	138	144	4.2	4.2	0.9
0	1	1	4	14	6	5	3	1	0	0	0	0	1	0	0	0	0	0	0	0	50	46	27.5	30.3	9.4	9.9	162	236	25.2	37.2	8	9	23	26	16	18	6.9	7.1	113	114	0.4	0.4	121	138	141	144	4.2	4.3	0.6
0	0	1	4	14	6	5	3	1	0	0	0	0	1	0	0	0	1	0	0	0	6	75	34.2	38.3	10.1	11.1	217	277	20.7	28.2	14	15	18	21	20	29	7.9	8.6	107	110	1.3	2.7	162	241	141	143	4.7	6.5	1.6
0	1	1	2	15	6	5	4	3	0	0	0	0	0	0	0	0	0	0	0	0	2	58	27.7	37.1	9.3	11.9	172	219	18.6	22.3	11	12	23	23	14	14	8.2	8.2	105	110	1	1.2	139	155	135	140	3.9	4.8	1.9
0	0	1	2	15	6	5	4	0	0	0	0	0	0	0	0	0	0	0	0	0	3	83	36.2	41.9	12.4	14	313	325	12.5	12.9	17	18	25	26	44	47	9.6	9.6	98	99	1.4	1.6	95	121	136	138	4.3	4.8	0.7
0	1	4	9	15	6	5	4	0	0	0	0	0	0	0	0	0	0	0	0	0	5	57	26.2	32.1	9.1	11.1	141	174	11.5	22.4	12	12	24	27	15	19	6.7	9.8	102	108	1.2	1.3	113	113	137	141	3.7	4.4	2.1
0	1	1	3	8	4	1	3	0	1	0	0	0	0	0	0	0	0	0	0	0	16	80	44.4	44.6	14.7	14.7	198	202	14.8	17.2	16	16	25	25	17	18	8.8	9.1	99	101	0.8	0.8	134	136	136	138	4	4	1.1
0	1	2	4	3	1	1	1	0	0	0	0	0	1	0	0	0	0	0	0	0	23	61	29.8	53.8	9.6	16.6	55	157	5.1	14.4	17	26	9	20	19	24	8.4	12.7	105	112	1.8	2.1	156	403	140	149	2.6	3.5	5.2
0	0	4	5	14	6	4	4	0	0	0	1	0	1	0	0	0	0	0	0	0	2	73	21.6	35.7	7.5	11.7	194	253	30.4	41.2	13	14	21	27	32	42	6.1	6.9	103	111	1.6	2.3	178	315	143	146	4	5	2.1
0	1	1	3	14	6	4	4	2	1	0	0	0	1	0	0	0	0	0	0	0	14	43	46	52.2	15.8	18.1	183	276	14.3	23	18	25	14	19	35	49	7.6	8.4	93	100	2.5	3.4	180	251	124	131	5.5	5.9	1.6
0	1	1	5	15	6	0	3	0	0	1	0	0	0	0	0	0	0	0	0	0	2	82	31.1	35.7	11	12.2	95	98	6.5	8.4	18	20	20	25	35	40	6.9	8.2	96	104	1.8	2	94	122	133	140	3.8	3.8	1.1
0	1	4	12	11	6	2	3	0	0	0	0	0	0	0	0	0	0	0	0	0	3	52	30.9	34	10.1	11.2	64	99	18.5	36.8	16	20	11	14	54	67	6.9	8.2	105	109	2.4	3	38	95	132	138	2.7	4.3	4.5
0	1	4	2	9	5	1	3	0	0	0	0	0	0	0	0	0	0	0	0	0	10	53	41.9	47.1	14.3	16.6	160	205	11.2	16.8	14	17	20	21	21	22	8.6	8.6	105	110	0.9	0.9	126	141	138	141	3.7	4.2	1.5
0	0	1	2	14	6	5	3	0	0	0	0	0	0	0	0	0	0	0	0	0	3	63	28.7	31	9.2	9.8	212	241	38.2	69.7	14	20	9	17	13	23	7.1	7.7	106	113	1.7	2.6	177	287	133	137	3.1	4.4	2.4
0	0	1	3	13	6	4	3	0	0	0	0	0	0	0	0	0	0	0	0	0	2	62	23.2	28.9	8	9.1	137	172	4.2	4.3	14	15	19	21	16	18	7.2	8.3	101	111	0.9	1.1	88	114	134	141	2.9	3.3	3.6
0	1	1	2	13	5	4	4	0	1	0	0	0	0	0	0	0	0	0	0	0	5	53	29.9	30.5	9.8	10.3	223	259	9.6	14.2	9	11	22	24	19	21	8.1	8.6	104	106	1.2	1.2	130	168	133	135	4.2	4.4	1.8
0	1	1	2	10	6	1	3	1	0	1	0	0	0	0	0	0	0	0	0	0	27	40	31.8	35.6	9.9	10.7	130	135	9.8	11	10	11	30	39	21	27	7.8	8.3	97	101	0.4	0.4	83	192	138	141	4.3	4.9	0.7
0	1	2	5	14	6	4	4	1	0	0	0	0	0	0	0	0	0	0	0	0	3	75	32	37.6	12.1	12.5	181	188	11.9	13.1	12	12	22	22	12	12	7.7	7.7	110	110	1.1	1.1	116	116	139	139	3.9	4.8	1.8
0	1	4	3	14	6	4	4	1	0	0	0	0	0	0	0	0	0	0	0	0	3	55	41.9	42.5	13.7	13.9	222	239	10.9	13.8	10	15	22	26	15	19	7.3	8.4	101	105	0.4	0.8	174	238	134	138	3.3	4	1.1
0	1	1	2	14	6	5	3	0	1	0	0	0	0	1	0	0	0	0	0	0	6	60	30	31.5	9.9	10.2	128	138	11.7	14.4	10	11	26	27	10	10	7.9	8.1	105	109	0.6	0.7	118	130	138	142	3.6	4.1	0.9
1	0	4	7	8	5	2	1	0	2	0	0	0	1	0	0	0	0	0	0	0	2	58	18.9	23.5	6.6	8.1	45	71	16.5	20.1	26	28	16	18	136	142	8.2	9.3	90	93	1.8	2.1	176	290	131	131	3.7	4.1	3.6
0	1	4	6	12	5	5	1	2	2	1	0	0	1	1	0	0	0	0	0	0	8	51	30.7	33.8	10.2	11.4	47	62	6.6	7.5	8	8	24	24	21	21	7.6	7.6	118	118	1	1	112	112	146	146	3.6	3.6	1.1
0	0	4	7	10	5	1	4	0	0	0	0	0	0	0	0	0	0	0	0	0	2	39	22.4	27.8	8.1	10	98	134	12.5	20.1	15	18	19	24	14	29	7.1	8.1	100	107	1.2	2.1	108	127	140	141	3.9	4.9	2.6
1	1	4	3	7	4	1	2	0	0	0	0	0	0	0	0	0	0	0	0	0	2	86	29.5	40.5	9.2	13.5	179	294	13	19.3	10	13	25	27	31	34	6.5	7.5	103	111	1.5	2.3	109	176	139	143	3.4	3.9	1.4
0	0	1	6	7	1	4	1	3	0	0	0	0	0	0	0	0	0	0	0	0	2	80	23.4	29.5	8.2	9.2	183	240	10.5	11.6	9	9	24	25	12	13	8.4	9.2	106	109	0.6	0.7	74	74	135	135	4.3	4.8	0.7
0	0	4	7	14	6	5	3	0	0	0	0	0	0	0	0	0	0	0	0	0	5	80	25.4	27.6	8.3	9	81	89	14.5	23.3	11	13	29	31	24	28	7.9	8.2	100	100	3.2	3.5	75	82	138	138	4	4.2	2
0	0	2	3	10	5	1	4	0	0	0	0	0	1	0	0	0	0	0	0	0	2	37	20.3	30.8	7.1	9.6	476	878	11.8	25.9	11	35	6	18	39	82	8	10.3	85	110	1.9	4.2	115	1131	123	135	4.4	7.6	1.3
0	1	3	2	15	6	5	4	1	0	0	0	0	0	0	0	0	0	0	0	0	4	39	21	29.1	6.9	9.5	257	344	1.8	6.3	8	16	16	23	15	19	5.5	7.3	97	109	0.6	1.1	94	238	131	133	4.1	4.6	1.9
0	1	1	2	13	6	4	3	0	0	0	0	0	0	0	0	0	0	0	0	0	2	80	32.3	36.2	10	11.3	178	207	9.6	13.7	11	13	32	35	21	30	9.4	9.7	99	102	0.7	0.8	92	104	140	143	4.1	4.5	2.7
0	0	4	6	14	6	5	3	0	0	0	0	0	0	0	0	0	0	0	0	0	2	79	23.4	35.6	7.3	10.9	147	300	8.4	18.2	16	22	20	23	39	41	8.5	8.9	102	105	1.8	2.1	156	238	141	145	3.7	4.1	1.2
0	1	4	3	14	6	5	3	0	0	0	0	0	0	0	0	0	0	0	0	0	3	26	34	38.8	11.5	13.4	240	273	7.6	10.6	11	12	20	22	13	16	7.9	8.1	110	114	1	1.2	92	119	140	140	3.8	4.7	1.1
1	1	1	3	3	1	1	1	0	0	0	0	0	0	0	0	0	0	0	0	0	3	62	31	43.3	10.4	14.1	5	17	10.1	20	22	24	14	19	20	37	7.9	8	101	106	1.4	3.4	98	184	141	145	3.6	4.6	4.4
0	1	4	5	11	6	2	3	0	0	0	0	0	0	0	0	0	0	0	0	0	4	85	22.7	26.2	7.3	8.5	260	297	8.8	10.1	11	19	23	26	21	27	8.9	9.7	95	104	0.8	1.2	78	212	135	140	3.5	4.6	1
0	1	1	3	14	6	4	4	1	0	0	0	0	0	0	0	0	0	0	0	0	5	86	23.4	24.6	7.4	7.6	340	346	12.7	14.4	18	18	27	29	43	47	8.3	8.6	90	91	2.5	2.7	116	152	135	138	3.7	4.3	1.4
0	1	4	9	14	6	4	4	0	0	0	0	0	0	0	0	0	0	0	0	0	5	62	24	38.4	8.8	13.9	88	147	13	19	13	18	21	22	27	35	7.9	8	105	112	1.3	2.3	111	152	140	144	3.5	4.5	1
0	1	1	2	15	4	0	3	0	1	0	1	0	0	0	0	0	0	0	0	0	6	59	43.9	45	14.5	14.8	266	285	17.9	24.1	14	19	18	23	32	38	7.3	7.8	99	110	2	2.7	155	203	134	145	5.1	6.9	1.6
0	1	1	2	6	3	1	2	0	0	1	0	0	0	1	0	0	0	0	0	0	4	40	27.2	30.8	9.2	10.1	418	474	15.1	24.4	11	14	26	31	12	14	7.4	8	95	100	0.7	0.7	99	111	133	136	4	4.1	0.8
0	0	1	2	15	6	5	4	0	0	0	0	0	0	0	0	0	0	0	0	0	2	64	35.2	36	10.8	11.3	291	316	5.3	7.3	16	21	14	21	27	28	8.1	8.3	104	106	0.9	1.1	195	268	135	139	4.4	5.7	0.9
0	1	4	6	9	5	1	3	0	1	0	0	0	0	1	0	0	0	0	0	0	6	74	28.1	31.6	8.9	9.9	89	103	2.7	6	14	15	20	24	7	13	7.6	7.8	99	103	0.6	0.7	89	110	133	134	3.5	4	1
0	0	4	2	15	6	5	4	1	0	0	0	0	0	0	0	0	0	0	0	0	6	72	30	37	8.8	10.9	192	237	7.5	14.4	11	18	19	22	36	39	6.7	8.5	107	114	1.3	1.6	98	252	139	142	3.9	4.7	1.4
0	0	1	4	14	6	5	3	0	0	1	0	0	0	0	0	0	0	0	0	0	2	21	25.8	27.2	8.5	9.2	53	64	5	9.4	13	16	19	20	6	9	7.6	8.2	106	112	0.6	0.8	88	107	136	143	3.2	3.6	1.6
0	0	1	10	11	6	1	4	1	1	0	0	0	1	0	0	0	0	0	0	0	5	75	22.3	30.4	7.6	11.1	49	64	19	24.7	14	16	18	22	29	40	6.8	7.2	108	111	1	1.8	112	137	140	141	3.6	4.4	1.8
0	1	1	3	11	6	1	4	0	0	0	0	0	0	0	0	0	0	0	0	0	4	84	22.6	30.2	8	9.7	125	193	10.3	13.8	9	17	23	27	37	40	8.6	8.6	108	111	1.9	1.9	159	297	142	144	4.4	5.5	1.1
0	1	1	2	15	6	5	4	0	1	0	0	0	0	0	0	0	0	0	0	0	3	61	36.7	45.3	12.1	15.3	66	101	10.3	15.6	17	18	21	22	14	14	9.2	9.3	97	99	0.9	0.9	170	220	136	138	3.7	4.2	2.7
0	1	1	7	14	6	4	4	0	0	0	0	0	1	0	0	0	0	0	0	0	3	67	32.4	39.1	10.8	13.2	36	83	5.7	26	7	16	21	26	10	12	7.4	7.7	105	107	0.4	0.7	93	138	140	145	3.1	3.6	1.2
0	0	1	3	15	6	5	4	0	0	0	0	0	0	0	0	0	0	0	0	0	2	74	32.6	34.9	11.6	12.5	468	522	25.4	27	12	16	22	26	17	24	8.1	8.8	90	95	0.7	0.9	93	139	124	129	3.9	4.3	1.3
0	1	1	2	13	6	4	3	0	0	0	0	0	1	0	0	0	1	0	0	0	5	36	23.8	32.2	7.7	10.4	168	203	24	64.1	12	14	16	20	29	34	7.8	7.8	113	116	1.1	1.2	109	109	143	143	4.3	4.3	1.3
0	0	1	2	15	6	5	4	0	0	0	0	0	0	0	0	0	0	0	0	0	2	78	24.9	32.7	8.4	11.1	111	129	5.5	6.2	10	13	22	24	9	10	7.5	7.9	93	95	0.7	0.8	101	126	120	126	4.4	4.5	1.1
0	0	4	5	14	5	5	4	0	0	1	0	0	0	1	0	0	0	0	0	0	4	84	31.3	33	10.6	11.3	283	289	12.8	14.1	15	18	24	24	28	30	8.4	8.8	99	100	1.2	1.4	136	140	135	137	3.6	3.9	0.9
0	1	1	2	14	6	5	3	0	1	0	0	0	1	0	0	0	0	0	0	0	4	65	24.4	30.9	7.6	9.9	517	675	15.6	22.3	13	20	21	23	15	18	8	9.2	100	108	0.8	1	77	83	138	138	4.2	4.5	0.9
1	1	1	3	15	5	0	1	0	1	1	0	0	1	0	0	0	0	0	0	0	4	55	31.7	38.3	10.8	13.2	271	348	15.8	17.2	20	20	20	20	33	34	7.5	7.5	98	98	4.1	4.2	238	238	134	134	4.1	4.1	1.4
0	1	1	2	15	6	5	4	0	0	0	0	0	0	0	0	0	0	0	0	0	3	67	30.5	35.9	10.5	12.2	154	173	8.7	11.5	7	10	23	24	12	13	7.8	7.8	102	110	0.9	1.3	111	170	136	138	3.8	4.3	1.2
0	0	1	5	15	6	0	4	0	1	0	0	0	1	0	0	0	0	0	0	0	2	45	27.2	36	9.2	12.5	159	236	7.7	30.8	11	21	13	23	13	29	4.6	9	87	122	0.8	2.7	64	132	126	144	2.3	5	1.2
0	0	1	8	3	1	1	1	0	0	0	0	0	0	0	0	0	0	0	0	0	15	58	34.5	38.9	12	13.2	113	157	14.9	28.5	16	19	14	21	41	51	6.4	6.9	94	106	1.8	3.2	58	97	130	133	2.3	4.1	1.5
0	1	1	8	10	5	1	3	0	0	0	0	0	0	0	0	0	0	0	0	0	5	47	29.9	35.2	10.8	13	27	75	3.3	6.9	10	14	20	22	14	17	6.6	7.7	110	113	0.6	0.7	92	147	137	143	3.7	6.8	2.6
1	0	1	7	13	5	4	4	0	0	0	0	0	0	0	0	0	0	0	0	0	2	26	19.7	23.5	6.5	7.9	11	40	0.1	0.3	17	23	23	27	29	30	7	7.5	99	104	1.3	1.6	80	115	138	145	3.5	3.8	2.2
0	0	4	5	14	6	5	3	0	0	0	0	0	0	0	0	0	0	0	0	0	4	87	27.9	31.8	9.6	10.8	69	88	9.6	10.8	8	8	20	23	17	18	7.7	7.7	113	115	0.7	0.8	114	114	139	139	4.3	4.7	1
0	0	1	9	3	1	1	1	2	0	0	0	0	0	0	0	0	0	0	0	0	5	72	22.3	28.5	7.1	8.8	120	152	7.9	14.8	12	15	22	22	18	22	8.3	8.3	107	115	0.8	1.3	108	108	139	144	4.3	4.6	0.8
0	0	1	6	15	6	5	4	1	0	0	0	0	0	0	0	0	0	0	0	0	2	84	24.3	32.5	8.4	11	103	135	11.8	13.7	12	12	21	23	12	14	8	8.4	109	116	0.7	0.7	112	112	140	140	4.2	4.2	1.6
0	0	1	2	10	6	1	3	0	0	0	0	0	0	0	0	0	0	0	0	0	4	77	26.9	37	9.9	11.8	234	297	8.4	11.8	15	30	15	22	18	20	8.1	8.4	101	112	0.9	1.1	115	220	141	145	3.8	5	1.9
0	1	4	3	7	5	1	1	0	0	0	0	0	0	0	0	0	0	0	0	0	20	58	45.2	48.9	15.4	16.1	123	172	12.3	19	14	14	23	23	20	21	8.6	8.6	107	107	0.9	1	140	140	140	140	4.2	4.2	1.3
0	0	1	4	14	6	4	4	2	0	0	0	0	0	0	0	0	0	0	0	0	2	89	30	38.7	9.3	11.5	123	200	4.6	7.3	14	20	19	24	37	42	8	8.2	103	109	0.9	1.1	96	109	138	143	4	4.4	1.9
0	1	4	10	11	6	1	4	0	1	0	0	0	1	0	0	0	0	0	0	0	2	49	26.8	32.8	9	11.3	110	139	4.6	10.2	24	25	15	15	100	113	7.1	7.8	106	109	7.4	9.2	132	210	141	143	5	5.4	0.4
0	0	1	3	7	3	1	3	1	0	0	0	0	0	0	0	0	0	0	0	0	24	60	33.2	36.4	10.7	11.8	217	258	9.7	11.4	11	14	22	26	7	8	7.2	7.7	102	103	0.3	0.6	118	167	135	136	4	4.3	1.1
0	0	1	2	14	6	5	3	0	0	0	1	0	0	0	0	0	0	0	0	0	2	81	26.3	29.7	8.1	9	367	387	5.7	7.6	14	14	28	29	62	63	8.6	9.3	102	103	1.6	1.7	108	146	139	141	4.6	4.8	3
0	1	1	2	13	6	4	3	0	0	0	0	0	0	0	0	0	0	0	0	0	3	19	31.8	37.4	11.5	13	195	425	3.3	11.1	7	11	24	23	10	14	8.3	8.9	112	113	0.8	1.3	100	110	143	144	4.1	4.1	1.4
1	0	4	6	3	1	1	1	0	1	0	0	0	1	1	0	0	0	0	0	0	9	73	21.4	24.4	6.9	7.7	183	315	14.6	22	24	27	18	22	26	30	7.2	8.3	94	96	0.7	0.8	137	198	136	137	3.5	4.2	5.3
0	1	4	6	11	6	2	3	1	0	0	0	0	0	0	0	0	0	0	0	0	8	67	40.1	45.2	13	14.9	246	277	11.6	15.5	13	19	23	28	46	80	7.9	8.5	90	102	1.7	3.5	122	225	133	135	3.9	4.4	1.1
0	1	1	2	12	5	4	3	0	0	0	0	0	0	0	0	0	0	0	0	0	5	60	31.2	34.7	9.6	10.4	142	151	5.1	6.7	10	11	22	24	22	26	9.6	9.7	107	107	0.9	1	85	124	134	137	4.7	5.1	0.7
0	1	1	2	15	5	0	1	0	0	1	0	0	0	1	0	0	0	0	0	0	6	66	30.2	38.7	9.6	11.3	149	302	17.3	25	16	21	13	20	17	26	7.5	7.9	104	110	1.3	1.5	103	221	135	141	4.4	5.6	3.9
0	1	1	2	15	6	0	4	0	0	0	0	0	0	0	0	0	0	0	0	0	2	42	36.8	42.7	11.2	13.2	244	272	13.4	18.3	12	17	23	24	13	22	8.6	9.6	103	106	0.9	0.9	144	154	137	139	4.4	4.7	1
0	0	1	3	8	1	4	3	0	0	0	0	0	0	0	0	0	0	0	0	0	41	56	24.1	30.7	7.7	9.7	281	333	7.6	9.7	9	15	28	31	6	6	8	8.6	106	109	0.6	0.7	103	127	143	150	3.2	3.8	0.8
0	1	4	3	14	6	5	3	0	0	0	0	0	0	0	0	0	0	0	0	0	2	59	35.1	45.3	12.3	14	126	149	5.8	8.5	11	17	24	25	12	14	7.9	7.9	96	105	0.7	0.8	157	234	133	137	3.8	4.5	1.7
1	1	4	6	15	1	0	1	0	0	0	0	0	0	0	0	0	0	0	0	0	2	28	41.8	47	14.7	16.4	93	159	8.3	16	16	28	15	18	16	27	7.3	7.7	102	111	1.8	2.2	181	380	134	142	3.3	7.9	3
0	1	1	6	12	5	5	1	1	0	0	0	0	0	0	0	0	0	0	0	0	3	38	32.1	36.2	10.2	11.3	198	245	8.6	13.1	11	11	25	26	11	14	8.5	8.2	104	107	0.7	0.8	133	133	136	136	4.8	5.1	1.5
0	0	1	4	7	4	1	2	0	0	1	0	0	0	0	0	0	0	0	0	0	9	84	32.3	36.8	10.3	11.5	123	132	5.5	6.1	12	13	31	31	88	91	8.6	9.4	99	102	2.3	2.7	90	127	137	141	4.8	4.9	1.5
0	0	1	6	3	1	1	1	0	0	0	0	0	1	0	0	0	0	0	0	0	2	72	23.7	26.3	8.1	9	107	176	12.8	24.4	13	14	21	22	13	13	6.9	8.2	103	108	0.5	0.7	154	220	135	139	3.4	3.9	1
0	1	4	2	6	3	1	2	0	0	0	0	0	0	0	0	0	0	0	0	0	22	42	33.2	37.6	10.9	12.5	147	200	13.8	22.4	15	18	20	22	9	13	7.7	8.9	105	109	0.7	0.9	127	145	140	141	4	4.3	4.7
0	1	1	5	13	6	4	3	2	1	0	0	0	0	0	0	0	0	0	0	0	2	86	24.6	25.7	7.9	8.3	215	252	14.6	26.3	11	14	22	24	26	26	7.2	8.8	105	108	1.4	1.7	97	114	138	139	3.4	4	1.1
0	0	1	2	14	6	5	3	0	0	0	0	0	0	0	0	0	0	0	0	0	14	78	28	28	8.4	8.4	158	158	5.2	5.2	7	11	38	38	35	37	7.7	8.6	96	99	0.9	0.9	92	160	140	141	3.9	4.4	1.3
0	0	4	2	14	6	4	4	0	0	0	0	0	1	0	0	0	0	0	0	0	4	39	24.2	33.6	7.3	9.9	321	420	12.2	18.4	10	16	13	16	7	12	6.6	7.6	115	127	0.5	0.8	181	344	140	149	3.1	4.5	0.9
0	1	1	2	10	5	1	4	0	0	0	0	0	0	0	0	0	0	0	0	0	3	52	44.3	50.7	15.2	15.8	180	254	33.3	37.4	17	39	9	29	10	23	6.3	8	95	117	1.3	2.8	100	154	139	156	2.7	5.7	4
0	0	1	2	13	6	4	3	0	0	0	0	0	0	0	0	0	0	0	0	0	2	93	35.4	35.4	10.1	10.1	199	199	21.7	21.7	15	15	27	27	39	39	8.5	8.5	101	101	1.2	1.2	133	133	139	139	4.2	4.2	2.9
0	0	1	4	14	6	4	4	0	1	0	0	0	1	0	0	0	0	0	0	0	2	78	33.5	37.6	11	12.4	283	298	10.7	16.8	15	20	19	20	34	45	9.2	9.4	100	106	1.1	1.8	113	133	138	141	4.1	5.6	1.4
1	0	4	4	3	1	1	1	1	1	0	0	0	1	0	0	0	0	0	0	0	4	70	29.4	38.2	9.9	12.3	128	157	16.3	19.3	13	33	11	18	21	28	7.3	9.2	97	112	0.6	1.5	136	236	136	140	3.2	5.2	1.4
0	0	4	3	7	5	1	1	0	0	0	0	0	0	0	0	0	0	0	0	0	9	48	29.5	30.2	8.6	9.1	334	336	11.5	13.6	12	17	22	24	9	13	7.3	7.8	104	107	0.8	0.8	96	109	139	139	3.6	3.8	0.7
0	0	4	4	3	1	1	1	1	0	0	0	0	0	0	0	0	0	0	0	0	8	37	35.5	47.5	11.7	14.5	123	296	11.2	18.7	10	17	14	20	8	16	5.8	7.4	116	121	0.5	0.8	139	190	141	148	2.6	4.5	2
0	0	1	3	14	6	5	3	3	0	0	0	0	0	0	0	0	0	0	0	0	6	84	27.7	37.3	8.9	12.1	114	165	10.3	16.3	11	12	23	25	13	14	8.4	8.4	108	112	0.7	0.8	101	101	139	143	4	4.2	0.9
0	1	1	6	14	6	4	4	1	0	0	0	0	0	0	0	0	0	0	0	0	9	51	23	25	7.2	8	112	114	12.9	15	13	16	20	24	21	23	7.8	8.1	97	101	1.5	1.8	117	145	131	133	3.4	4.1	0.9
0	1	1	9	4	2	1	1	0	0	0	0	0	0	0	0	0	0	0	0	0	3	35	36.5	36.8	12.6	12.7	142	155	9.6	9.8	12	14	26	26	12	12	8.1	8.5	100	103	1	1	113	126	136	137	4.1	4.1	0.8
0	1	1	2	7	4	1	2	0	0	0	0	0	0	0	0	0	0	0	0	0	20	49	44.1	50.3	15.5	16.7	204	223	4.7	10.4	14	19	20	25	20	23	8.8	9	96	100	0.5	0.9	131	162	127	133	3.8	6.3	1.1
0	0	1	7	15	6	0	3	1	2	0	0	0	0	1	0	0	0	0	1	0	2	61	26.8	30.8	8.4	9.3	243	384	5.5	14.6	7	19	23	29	9	25	6.9	8.3	89	101	2.5	4.6	85	215	130	134	3.7	5.3	0.8
0	0	2	4	15	6	5	4	0	0	0	0	0	0	0	0	0	0	0	0	0	5	68	28.3	36	9.5	11.6	180	256	7.9	11.8	15	18	19	20	82	86	8.4	8.7	106	109	4.5	5.2	132	158	138	143	3.7	4.1	1.1
0	0	4	4	11	5	2	4	0	0	0	0	0	1	0	0	0	0	0	0	0	9	62	32	36.6	10.3	11.2	54	78	5.5	37.8	18	21	9	14	25	35	7.2	8.1	109	113	1.7	2.5	98	193	139	140	3	3.9	2.9
0	1	2	2	14	6	5	3	0	0	0	0	0	0	0	0	0	0	0	0	0	2	77	36.4	37.5	12.2	12.6	189	222	6.5	7.1	15	16	22	24	21	22	9.4	9.4	106	106	2.2	2.2	121	130	139	141	4	4.7	1.5
0	1	2	8	3	1	1	1	2	1	0	0	0	0	0	0	0	0	0	0	0	6	62	23.2	31.1	8.1	11.3	82	154	5.3	12.8	13	15	25	28	22	25	8.8	9.2	106	109	1.2	1.5	149	170	140	144	4.4	4.7	1.2
0	1	4	3	3	1	1	1	0	0	0	0	0	0	0	0	0	0	0	0	0	4	58	25.9	31.2	9.4	11	187	209	7.8	10.6	7	7	22	25	13	14	7.7	8	110	116	0.8	0.8	105	105	138	142	3.4	4.4	1.7
1	0	1	6	4	1	2	1	0	2	0	0	0	0	1	0	0	0	0	0	0	3	67	25	29.5	7.2	8.6	241	317	28.1	34.6	16	21	16	20	26	28	7.7	8.2	103	108	3.6	3.7	66	151	135	138	3.8	4.3	2.4
0	0	1	2	14	6	5	3	0	1	0	0	0	0	0	0	0	0	0	0	0	3	68	29.5	34.9	9.4	11.2	427	459	11.1	11.1	9	16	16	28	7	12	4.2	9.5	96	121	0.3	0.8	57	109	133	144	2	4.1	0.9
0	0	1	4	14	6	4	4	1	1	0	0	0	0	0	0	0	0	0	0	0	4	82	29.8	35.4	10	11.7	143	213	11.7	32.6	13	22	15	22	27	35	6.8	8.4	104	113	1.4	2.7	106	264	137	139	3.7	5.3	1.4
0	1	1	4	10	1	5	2	0	0	0	0	0	0	0	0	0	0	0	0	0	5	65	41.8	44	13.9	14.6	107	141	2.8	8.8	11	15	21	23	18	22	8	8.5	108	109	0.7	1.2	121	188	139	141	3.4	5	2.1
0	1	1	6	11	6	1	4	0	0	0	0	0	0	0	0	0	0	0	0	0	7	76	38.1	38.1	12.2	12.2	172	179	14.8	17.9	15	16	23	24	53	54	8	8	97	98	3.5	3.6	94	112	131	133	4.4	4.5	1.1
0	0	4	2	14	6	5	3	0	0	0	0	0	0	0	0	0	0	0	0	0	4	30	32	39.9	11.1	13.5	130	147	8.2	10.1	16	16	22	22	7	7	9.4	9.4	103	103	0.7	0.7	121	121	136	136	4.5	4.5	3.1
0	1	1	3	5	3	1	1	0	2	0	0	0	0	0	0	0	0	0	0	0	22	51	36.1	44.6	12.6	15.1	201	256	9.2	17	11	13	22	25	9	12	8.1	8.4	106	110	0.7	0.9	111	151	142	145	4.1	4.3	0.8
0	1	1	2	6	4	1	1	0	1	0	0	0	0	0	0	0	0	0	0	0	27	71	33.9	35.3	11.5	11.9	166	174	7.1	7.4	15	16	25	27	26	28	8.1	8.5	97	99	1.1	1.2	131	152	134	137	3.7	4.4	1.4
0	0	1	2	15	6	5	4	0	0	0	0	0	0	0	0	0	0	0	0	0	2	78	42.5	43.4	13.6	14.7	169	172	4.1	12.8	15	17	20	23	13	22	8.1	9.6	107	108	0.9	1.8	75	157	138	142	3.2	4.9	2.5
1	1	1	2	13	5	4	4	0	0	0	0	0	0	0	0	0	0	0	0	0	4	81	31.4	44.8	10.9	14.6	106	200	11.5	19.4	15	16	20	25	24	32	8	8.9	100	107	1.8	2.2	137	150	135	137	4.7	5	1.4
0	1	1	2	14	6	5	3	1	0	0	0	0	1	0	0	0	0	0	0	0	2	63	18.8	27.4	6.2	9.3	99	162	12.9	15.1	10	14	27	32	10	19	7.5	8.4	93	94	0.3	0.4	81	116	134	136	3.1	3.8	1.2
0	1	1	3	15	5	0	1	1	0	0	0	0	1	0	0	0	0	0	0	0	2	82	24.6	33.1	8	10.8	172	213	8.5	13.9	9	15	21	24	21	22	7.8	8.5	105	109	0.7	0.8	176	176	136	137	4.6	4.7	0.9
1	0	2	2	11	6	1	4	0	0	0	0	0	0	0	0	0	0	0	0	0	6	66	33.5	33.6	11.8	12	196	218	10.4	11.3	13	19	25	26	5	6	7.8	8.1	81	82	0.3	0.4	91	103	116	122	3.7	3.9	3.5
0	0	1	2	6	4	1	1	0	0	0	0	0	0	0	0	0	0	0	0	0	12	76	32.8	38.1	11	12.6	264	283	9.5	11.4	10	15	24	28	23	31	9.8	10.2	103	109	0.6	0.8	144	219	139	142	4.2	4.6	1.4
0	1	2	6	12	5	4	3	0	0	0	0	0	0	0	0	0	0	0	0	0	2	61	40.5	49.7	13.4	16.1	212	335	5.1	5.7	16	26	17	29	43	85	9.2	11.1	99	102	6.3	10.4	73	210	137	142	4	7.4	0.9
0	0	1	2	14	6	4	4	1	0	0	0	0	0	0	0	0	0	0	0	0	6	67	26.3	30.6	8.6	10.2	90	139	11.4	22.5	12	17	22	24	29	35	7.8	8.4	104	110	0.6	1.2	110	126	138	141	4.5	5	1.1
0	1	1	2	11	6	1	4	0	0	0	0	0	1	0	0	0	0	0	0	0	12	52	29.6	32.5	10.1	11.7	272	302	8	15.8	9	10	22	26	4	7	7	8.7	99	104	0.6	0.7	96	121	130	132	3.8	3.8	0.6
0	0	2	2	3	1	1	1	0	0	0	0	0	0	0	0	0	0	0	0	0	2	75	25.7	27.7	8.6	9.9	184	299	15.8	27.1	10	18	19	25	23	34	7.8	10.1	105	113	0.8	1.6	134	156	137	144	3.4	5.5	1.5
0	0	2	2	13	6	4	3	0	0	0	0	0	0	0	0	0	0	0	0	0	2	47	33.9	40.2	11.7	13.3	208	220	12.6	14.6	15	17	15	19	17	25	8.5	8.5	105	109	0.9	1	152	159	135	137	4	4.4	1.2
1	0	4	2	15	1	0	1	1	1	0	0	0	0	0	0	0	0	0	0	0	4	62	21.2	31.4	7	10.8	79	178	5.3	10.4	14	18	18	21	39	47	8.6	8.6	99	109	2.5	3	116	137	132	140	4.3	5.4	0.9
0	1	1	5	14	6	4	4	0	0	0	0	0	0	0	0	0	0	0	0	0	2	78	28.3	29.1	9.2	9.6	187	199	7.9	11.1	14	15	22	23	43	54	7.6	8.1	111	111	1.5	1.7	81	144	142	143	4.8	5.5	2
1	1	1	5	3	1	1	1	0	0	0	0	0	0	0	0	0	0	0	0	0	5	84	44.4	49.5	13.9	15.1	127	142	9.8	15	11	15	28	35	19	26	7.6	8.8	97	104	0.9	1.1	140	160	140	141	3.9	4.5	1.9
0	1	1	6	15	6	5	4	0	0	0	0	0	0	0	0	0	0	0	0	0	2	48	31.5	36.2	10.4	12.3	127	149	9.5	13.1	9	12	24	25	16	18	9.1	8.6	103	107	1.3	1.3	105	105	139	139	4.5	5.2	1.8
1	0	4	7	3	1	1	1	0	0	0	0	0	0	0	0	0	0	0	0	0	11	87	31.4	34	10.7	11.5	344	388	20.4	33	11	14	20	23	11	13	6.9	7.3	99	102	0.4	0.5	62	87	134	136	4.4	5.6	2.1
0	0	1	2	10	6	1	3	0	0	0	0	0	0	0	0	0	0	0	0	0	4	47	25.8	30.9	9	10.6	155	241	9	11.9	10	17	17	27	8	14	6.1	7.5	106	115	0.4	0.7	118	128	139	146	3.3	4	1.4
0	0	4	4	15	6	5	4	1	0	0	0	0	0	0	1	0	0	0	0	0	2	81	22.9	29	7.4	9.2	256	370	13.3	23.4	13	17	24	26	19	24	9.6	9.6	99	107	0.9	1.2	88	142	137	139	4.6	4.9	2
1	1	1	2	14	6	5	3	0	1	0	0	0	0	0	0	0	0	0	0	0	6	93	32.3	32.3	10.5	10.5	589	589	11	11	17	17	17	17	27	28	8.6	8.6	104	106	1.8	1.8	143	143	135	140	3.8	4.5	1.2
0	1	1	5	5	3	1	1	0	0	0	0	0	0	0	0	0	0	0	0	0	2	92	30.3	35.4	9.3	11.1	180	209	16.6	27.7	16	21	25	26	47	57	9.2	9.2	100	107	1	1.5	98	214	141	144	4.5	5.3	2.4
1	0	1	4	3	1	1	1	0	0	0	0	0	1	0	0	0	0	0	0	0	2	74	34.1	34.1	11.3	11.3	125	125	7.8	7.8	18	18	20	20	22	22	8.5	8.5	104	104	1.2	1.2	125	125	138	138	4.2	4.2	1.6
0	0	4	7	3	1	1	1	0	0	0	0	0	1	0	0	0	0	0	0	0	14	90	12.8	31.6	4.1	9.2	49	187	2.6	6.7	15	20	15	19	10	11	9.7	11.3	111	117	0.5	0.7	203	256	143	147	3.7	4.8	3.2
0	0	2	2	4	1	1	2	1	1	0	0	0	0	0	0	0	0	0	0	0	27	61	31.9	33.4	11.2	11.7	298	312	18.4	21.1	18	27	16	20	6	8	7.7	9.3	97	108	1.1	1.6	93	158	137	142	2.6	4.4	1.4
1	1	4	9	15	6	5	4	0	0	0	0	0	0	0	0	0	0	0	0	0	2	31	25.6	27.6	8.2	8.8	241	283	19.8	32.5	10	12	21	22	33	39	7.8	8.1	105	108	5	5.8	92	92	136	136	7.2	7.2	1
0	0	1	2	14	6	5	3	0	0	0	0	0	0	0	0	0	0	0	0	0	3	52	24.2	30	7.7	9.4	299	332	12.4	17.9	14	17	22	28	35	48	6.7	8.7	100	116	1.9	2.8	122	187	139	146	3.1	7.6	1.7
0	1	4	5	14	5	5	4	0	0	0	0	0	0	0	0	0	0	0	0	0	3	90	21.2	31.1	7.3	10.7	101	143	5.1	9.3	8	11	22	24	25	26	8.1	8.1	110	114	0.9	1	82	82	138	143	4.3	4.3	1.2
0	0	1	4	10	5	1	4	0	1	0	0	0	1	0	0	0	0	0	0	0	5	59	28.3	37.3	10.4	12.8	108	139	9.2	10.6	11	13	25	26	55	57	7.9	9.1	107	110	1.4	1.5	73	238	137	144	4.2	5.9	1.3
0	0	1	5	14	6	5	3	0	0	0	0	0	0	0	0	0	0	0	0	0	4	69	24.6	39.5	8.1	12.9	200	370	7.5	11.8	14	18	13	19	11	12	7	7.7	101	105	0.4	0.5	82	138	132	135	4.1	5.4	1.9
1	0	1	3	3	1	1	1	0	0	0	0	0	0	0	0	0	0	0	0	0	18	61	26.1	40.7	8.4	13	104	176	21.7	30.6	12	19	14	21	16	19	5.7	8.3	102	118	0.5	1.1	184	409	128	144	3.4	4.7	2.3
1	1	3	4	3	1	1	1	0	0	0	0	0	0	0	0	0	0	0	0	0	6	44	36.7	47	11.3	15.3	225	290	15.1	35.9	16	25	13	21	12	25	8.3	9.3	101	109	1.3	1.5	74	182	139	139	3.8	4.6	1.6
1	0	4	3	15	2	0	1	0	0	0	0	0	0	0	0	0	0	0	0	0	4	76	41.5	43.5	13.7	14.3	206	236	18.1	24.4	12	16	22	24	9	12	8.9	9.5	102	106	0.6	0.7	119	142	138	148	4	4.2	1.2
0	1	1	2	11	6	2	3	0	2	0	0	0	1	1	0	0	0	0	0	0	8	67	38.4	43	12.9	14.2	104	109	11.2	12.5	11	14	25	27	10	11	8.9	9	97	98	0.6	0.6	81	99	135	137	3.6	4.2	1.5
0	1	1	6	14	6	5	3	0	0	0	0	0	0	0	0	0	0	0	0	0	17	82	22.8	31.5	7.8	9.8	100	134	11.3	13.8	10	10	21	24	17	17	8	8	111	115	0.9	1	85	85	141	143	3.3	4.3	2.1
0	0	1	7	10	5	1	4	0	0	0	0	0	0	0	0	0	0	0	0	0	20	68	29.8	35.1	10.6	11.3	245	323	15.2	19.8	16	18	20	22	22	23	7.9	8.6	103	106	1.1	1.1	109	284	137	139	3.5	4.6	1.3
0	1	1	3	12	4	5	1	0	0	0	0	0	0	0	0	0	0	0	0	0	4	66	21	32.6	8.3	10.2	59	391	8.3	19.4	14	18	18	24	12	13	6.9	7.8	104	111	0.8	0.9	106	117	136	145	3.6	4.1	1.1
1	1	4	2	7	4	1	2	0	0	0	0	0	0	0	0	0	0	0	0	0	13	64	40.8	41.5	13.9	14.5	391	398	12.3	15.4	16	16	27	28	15	15	8.8	9.2	90	95	0.6	0.7	115	119	134	138	3.6	3.9	1
0	1	4	6	10	5	2	3	1	0	0	0	0	0	0	0	0	0	0	0	0	5	53	32.5	33.3	10.9	11.1	382	476	11.5	16.6	14	18	17	24	3	6	6.4	7.8	99	100	0.5	0.7	102	143	131	133	3.6	4.1	0.8
0	0	4	3	11	6	2	3	0	0	0	0	0	0	0	0	0	0	0	0	0	3	87	36	36.4	11.7	11.8	202	219	6.9	8.5	11	13	22	25	16	17	7.3	7.7	103	104	0.6	0.7	121	124	137	141	3.8	5	2.4
0	0	1	3	7	3	2	2	0	1	0	0	0	1	0	0	0	0	0	0	0	2	77	33.6	36.6	10.9	11.9	158	168	8.4	10.7	15	17	21	21	10	10	8.1	8.2	100	100	0.6	0.7	137	155	136	138	3.5	4.1	1.1
1	1	1	5	14	6	5	3	0	1	1	0	0	0	0	0	0	0	0	0	0	2	85	27.1	28	8.8	9	271	283	5.9	6.9	12	15	25	26	22	31	7.4	8	97	102	1.3	1.5	123	129	134	136	3.8	4.2	1.9
0	1	1	2	13	6	4	3	0	0	0	0	0	0	0	0	0	0	0	0	0	6	82	28.8	33.8	9.9	11.4	99	128	12.3	15.8	12	20	24	27	21	24	8	8	97	102	0.7	1.1	146	187	137	137	3.8	4.2	6.2
1	0	1	8	11	5	4	2	0	0	0	0	0	2	0	0	0	1	0	0	0	4	79	24.1	30.9	7.4	9.5	102	146	7.8	16.4	13	13	24	24	36	39	8	8	110	111	1.8	1.8	98	101	147	148	4.6	4.6	2.6
1	0	4	7	3	1	1	1	2	0	0	0	0	0	0	0	0	0	0	0	0	6	34	20.4	24.2	6.6	7.7	128	223	15.4	21	15	18	20	23	5	7	7.6	9.4	100	114	0.5	0.6	140	220	138	146	3.4	4.6	3.2
0	1	4	2	15	6	5	4	0	0	0	0	0	0	0	0	0	0	0	0	0	2	64	24.5	24.9	8	8.2	468	486	15.3	17.8	16	17	30	31	83	86	9.1	9.3	96	97	2.8	2.8	139	203	143	144	4	4.1	0.9
1	0	4	4	15	4	0	2	0	1	0	0	0	1	0	0	0	0	0	0	0	2	72	29.7	35.8	8.9	10.8	255	379	5.5	12.8	16	19	16	22	46	50	6.1	8.5	104	110	1.8	1.9	138	209	134	144	4.4	6.2	3.2
1	0	1	6	15	1	0	1	0	0	0	0	0	0	0	0	0	0	0	0	0	11	30	25.8	30.3	8	9.3	36	46	11.2	14.5	14	18	20	24	29	36	7	7.7	94	106	0.9	1.1	106	132	133	137	3.3	4.3	2.3
0	0	1	4	14	6	5	3	1	0	0	0	0	0	0	0	0	0	0	0	0	3	66	20.8	34	7	11.4	128	176	10.1	15.3	13	14	21	22	12	12	8.2	9.8	103	104	0.9	1	132	187	138	139	3.8	3.9	1.3
1	1	4	10	3	1	1	1	0	0	0	0	0	0	0	0	0	0	0	0	0	2	72	31.4	38.5	9.5	11.8	322	424	21.3	34.6	16	21	20	25	33	35	7.5	8.6	101	105	2.1	2.6	87	146	135	142	4.4	4.7	2.9
0	1	1	4	14	6	5	3	0	0	0	0	0	0	0	0	0	0	0	0	0	2	35	41.1	42.1	13.6	14	75	77	4.2	7	10	11	23	25	8	8	7.9	7.9	110	112	0.7	0.7	128	137	141	142	3.5	3.6	1.2
0	0	1	2	4	1	1	2	0	0	0	0	0	0	0	0	0	0	0	0	0	8	75	26	26.6	8.6	8.8	95	95	7	7.4	11	13	26	29	47	47	7.9	7.9	108	109	0.7	0.7	81	167	143	145	4.4	4.4	0.8
0	0	1	2	8	4	1	3	0	0	1	0	0	0	0	0	0	0	0	0	0	6	86	22.5	30	6.1	6.1	335	335	18.4	18.4	12	17	19	25	19	19	7.7	7.7	102	107	1.3	1.3	140	178	135	138	4.4	4.6	1.3
0	0	4	3	14	6	5	3	0	0	0	0	0	0	0	0	0	0	0	0	0	2	70	19.5	26.9	6.5	9	54	153	4.9	23.2	11	14	19	21	45	49	7.8	7.9	83	88	1.5	1.7	150	171	118	118	4.4	5.1	1.5
1	0	1	4	6	4	1	1	0	0	0	0	0	0	0	0	0	0	0	0	0	16	83	29.3	40.9	10.3	13.6	241	293	9.9	18	13	22	19	22	18	27	6.7	8.7	105	115	0.9	1.5	150	204	141	146	3	4.1	1.8
0	1	4	3	14	6	4	4	0	0	0	0	0	0	0	0	0	0	0	0	0	4	83	29.8	31.9	10.8	11.4	175	201	7.8	8.8	14	15	24	25	12	13	8.1	8.5	104	106	1.2	1.2	132	155	139	141	3.5	4	1.6
0	0	2	2	15	6	5	4	0	0	0	0	0	0	0	0	0	0	0	0	0	4	77	32.8	33	9.6	9.8	171	207	6.2	6.4	20	25	17	20	41	48	8.1	8.7	102	103	2	2.5	111	125	138	139	4	5.6	2.1
0	1	1	2	15	1	0	1	0	0	0	0	0	0	1	0	0	0	0	0	0	3	39	47.5	51.9	15.5	16.9	261	316	9.8	14.8	16	21	22	23	5	6	8.6	8.8	108	111	0.8	0.9	94	117	145	147	3.6	4.5	1.1
0	1	1	3	3	1	1	1	0	1	1	0	0	0	0	0	0	0	0	0	0	15	63	38.2	40.6	13.2	13.6	436	493	20	20	16	17	23	24	22	28	8.4	8.4	103	105	0.7	0.8	104	105	139	139	4.6	4.6	1.4
0	1	4	4	14	6	5	3	0	0	0	0	0	0	0	0	0	0	0	0	1	4	66	31.7	34.6	10.3	11	271	302	9.6	11	21	23	22	27	46	61	7.9	8.6	90	96	4.7	5.9	241	338	134	137	4.2	5	1.6
0	1	1	2	3	1	1	1	0	0	0	0	0	0	0	0	0	0	0	0	0	43	43	28.9	29.3	9.6	10	167	201	20.9	25.1	15	16	23	24	29	34	7.9	9.1	116	117	1	1.1	96	97	152	152	3.4	3.8	0.7
0	1	4	3	6	4	1	1	1	0	0	0	0	0	0	0	0	0	0	0	0	6	33	32.4	43	10.8	13.4	267	338	10.1	21	11	17	19	25	12	17	8.1	8.5	104	111	0.9	1.3	103	137	136	142	3.8	4.4	4.2
1	0	1	12	9	4	1	4	1	0	0	0	0	0	0	0	0	0	0	0	0	7	82	21	26.1	6.7	8.6	270	437	7.6	10.3	20	21	20	21	82	85	5.6	6.6	90	93	3.2	3.2	81	86	128	129	4.2	4.3	1.5
0	1	1	6	15	6	5	4	0	0	0	0	0	0	0	0	0	0	0	0	0	3	59	25.4	31.2	8.1	9.3	76	99	6.5	10.6	13	13	19	20	32	37	7.9	8.8	109	114	1.8	2.2	138	138	136	141	4.7	6.3	0.9
1	0	2	5	9	4	1	4	0	0	0	0	0	1	0	0	0	0	0	0	0	9	58	31.1	32.1	10	10.5	380	400	28.7	32.8	17	25	18	23	48	59	8.8	8.8	88	90	2.5	3.2	123	162	125	125	5	5.8	1.9
0	1	4	2	13	6	4	3	0	0	0	0	0	0	0	0	0	0	0	0	0	16	27	38.3	44.2	12.2	14.4	292	378	15.1	22.4	15	27	16	24	11	19	8	8.5	100	102	0.8	1.1	128	188	137	138	3.8	6.2	0.8
0	1	1	9	14	6	4	4	1	0	0	0	0	0	0	0	0	0	0	0	0	7	83	23.9	29	7.7	9.3	82	100	9.7	10.4	13	15	19	19	45	45	8.8	8.8	107	110	1.5	1.5	122	122	134	139	4.6	5	0.8
0	1	1	7	6	1	1	1	0	0	0	0	0	0	0	0	0	0	0	0	0	5	54	37.8	39.6	12.8	14.3	226	282	11.3	19.4	11	13	27	33	14	15	7.5	9.4	104	110	1.1	1.3	92	196	145	147	2.8	3.9	1.4
0	0	1	4	6	4	1	1	0	0	0	0	0	0	0	1	0	0	0	0	0	3	54	33.8	36.8	11.8	12.4	278	290	8.8	14.9	13	14	28	28	11	15	8.9	9.3	100	103	0.8	0.9	197	215	138	140	3.5	3.9	1.2
0	1	4	4	3	1	1	1	0	0	0	0	0	0	0	0	0	0	0	0	0	14	36	42.4	44.3	14.3	15.7	175	200	6.5	8.5	14	16	24	26	11	19	7.4	8.5	100	103	0.6	0.9	126	189	136	139	3.5	4.7	1.9
0	1	1	6	14	6	5	3	2	0	0	0	0	0	0	0	0	0	0	0	0	4	55	30.5	37.3	10.3	12.9	120	140	9.5	13.9	11	14	21	24	15	18	7.7	7.7	109	111	0.8	1	130	130	140	140	4.2	4.5	0.9
1	0	1	3	15	4	0	1	0	0	0	0	0	0	0	0	0	0	0	0	0	5	23	27.7	41.9	8.7	13.6	71	179	4.1	13.3	12	20	24	29	10	13	8.8	12	104	107	0.7	0.9	114	195	142	145	2.9	4.1	0.9
0	1	2	2	11	6	2	3	1	0	0	0	0	0	0	0	0	0	0	0	0	8	52	42	43.9	13.7	14.5	228	264	10.3	10.6	18	24	16	21	6	12	7.7	8.2	99	106	0.8	1	122	224	134	141	3.5	5.4	1.5
1	0	4	4	13	6	4	3	0	0	0	0	0	0	0	0	0	0	0	0	0	2	62	23.8	33.5	7.9	10.7	158	248	16.4	29.5	25	34	9	18	15	25	8	10.1	102	108	0.8	1.6	90	155	139	150	4.1	6.5	11.2
0	1	2	4	10	5	1	4	0	0	0	0	0	0	0	0	0	0	0	0	0	2	83	26	27.2	7.6	8	853	1045	21.8	24.1	13	19	25	28	25	33	7.9	8.5	103	109	0.7	1	126	137	143	146	3.5	3.7	0.7
0	1	4	2	15	6	5	4	0	0	0	0	0	1	0	0	0	0	0	0	0	4	52	23.8	33.1	7.5	10.6	432	505	12.2	18.6	18	28	21	28	18	62	8.8	9.2	83	99	1.6	3.5	149	487	127	138	3.7	4.6	1.5
0	1	4	2	11	6	1	4	0	1	0	0	0	0	0	0	0	0	0	0	0	5	80	32.8	37.1	9.8	10.9	121	137	8.6	9	5	12	33	39	25	28	9.2	10.2	96	100	1.6	1.7	81	144	140	144	4.5	5.7	1.9
0	0	4	2	10	5	2	3	0	0	0	0	0	0	0	0	0	0	0	0	0	4	74	21.7	25.9	7.8	9	98	175	7.7	12	19	19	27	27	87	87	10.4	10.4	99	99	2	2	117	117	142	142	3.2	3.2	2
0	1	4	11	10	4	2	4	0	1	0	0	0	1	0	0	0	0	0	0	0	4	47	30.9	49.4	10.7	15.3	66	151	8.8	18.5	15	32	8	21	28	37	6.5	8.4	103	109	3	3.7	64	331	137	141	3.6	4.9	2.5
0	1	1	2	9	5	1	3	1	0	0	0	0	0	0	0	0	0	0	0	0	5	48	32.7	49.4	11.6	16.9	118	195	11.6	15.2	16	19	18	20	14	19	7.4	8.5	102	106	0.8	1.5	106	126	136	139	3.2	3.8	1.4
1	1	4	8	3	1	1	1	0	1	0	0	0	1	0	0	0	0	0	0	0	2	40	44.4	46.4	13.3	14.1	120	262	12.8	22.7	19	26	13	24	24	54	7.3	8.3	100	107	1.7	3.9	119	206	137	140	4.1	7	4.4
0	1	1	10	14	5	5	4	0	1	0	0	0	1	0	0	0	0	0	0	0	10	75	40.2	43	13.4	14.1	155	197	14.4	17.9	18	22	17	21	26	38	8.2	8.4	101	104	1.8	2.4	157	235	135	138	4.5	5.2	2.3
1	0	4	2	6	3	1	2	0	0	0	0	0	0	0	0	0	0	0	0	0	6	85	40.1	48.1	13.9	16.8	222	257	12.7	15.9	14	16	24	29	11	16	8.9	9	99	105	0.6	0.7	172	208	136	140	3.7	3.9	1
0	0	4	6	3	1	1	1	0	0	0	0	0	0	0	0	0	0	0	0	0	11	55	31.1	38.3	10	12.3	163	203	18.8	27.8	12	16	21	27	19	21	6.8	8.4	103	109	1.1	1.6	98	342	135	145	3.8	4.8	2.4
0	1	4	8	15	4	0	2	0	0	0	1	0	1	1	0	0	0	0	0	0	3	33	33.8	48.3	11.3	15	285	374	30.4	38.2	14	28	14	21	31	33	7	8.9	103	110	2.2	3.2	130	333	135	141	4	7.6	1.9
0	1	1	2	14	6	5	3	0	0	0	0	0	0	0	0	0	0	0	0	0	6	26	21.8	33.5	7	11.3	147	414	7.5	26.9	10	16	17	22	12	13	6.6	8	109	110	0.8	1	125	232	136	139	4.2	5.1	1.8
0	0	2	5	14	6	4	4	0	1	0	1	0	0	0	0	0	0	0	0	0	2	90	26.7	32.4	8.4	9.8	145	171	10	12.4	20	25	19	23	48	52	8	8.5	100	104	2.2	2.4	117	188	138	142	4.6	5.7	1.5
0	0	1	3	14	6	4	4	1	0	0	0	0	0	0	0	0	0	0	0	0	5	76	34	40.9	11.2	13.1	181	294	4	5	12	17	15	19	9	9	7.1	7.3	106	107	0.9	1.1	163	229	134	134	4	4.1	3
0	1	4	7	13	6	4	3	0	0	0	0	0	0	0	0	0	0	0	0	0	3	86	29.5	41.8	9.2	12.6	246	417	9.7	18.95	18	22	17	24	98	104	7.1	8.3	109	118	4.1	4.7	191	352	142	150	4.6	5.5	1
0	1	4	2	9	5	2	2	1	0	0	0	0	0	0	0	0	0	0	0	0	8	61	33.1	35.2	9.6	10.1	396	406	11.3	19.9	11	15	24	26	10	11	9.8	10.1	103	104	0.9	1	108	248	141	142	3.4	4.3	2.5
1	1	4	6	3	1	1	1	1	1	0	0	0	1	0	0	0	0	0	0	1	5	58	37.8	42.3	12.5	13.8	147	177	1.7	12.1	21	26	13	21	15	30	6.8	7.5	99	109	1.2	2.1	140	204	143	147	3.1	4.4	2
0	1	1	2	14	6	4	4	0	1	0	0	0	0	0	0	0	0	0	0	0	2	82	26.1	30.8	9.9	11.2	100	120	6.6	7.9	12	14	29	31	39	56	10.7	10.7	92	106	1.9	2.5	78	696	131	146	3.3	5.2	1.3
1	0	1	6	15	4	0	3	0	1	0	0	0	1	0	0	0	0	0	0	0	2	90	19.1	21.5	6	7.5	24	44	3	5.4	13	19	16	21	28	40	7.7	8.6	87	93	0.9	2.1	98	144	121	126	4.5	6.4	0.8
1	1	1	3	8	5	1	2	0	0	0	0	0	0	0	0	0	0	0	0	0	12	88	27.2	36	9	12.4	201	303	8.7	11.4	18	22	15	21	63	76	7.9	8.7	107	110	2.9	3.1	153	195	140	141	5	5.7	1.1
0	0	1	3	15	6	5	4	0	1	0	0	0	0	0	0	0	0	0	0	0	2	70	25	33.6	7.9	10.4	100	119	3.9	5.1	12	15	22	28	29	39	6.8	9	99	111	1.3	1.6	114	199	138	140	3.8	4.9	1
0	1	4	2	14	6	5	3	0	0	0	0	0	0	0	0	0	0	0	0	0	8	27	40.1	45	12.3	14.4	202	253	8.3	10.6	10	13	24	26	20	24	8.8	9.4	100	103	0.9	0.9	112	128	137	139	4.8	5	1
0	1	1	5	13	6	4	3	1	2	0	0	0	1	0	0	0	0	0	0	0	2	59	39.9	42.8	13	14	76	140	7.1	15.8	17	22	17	22	17	25	7.8	9.5	101	111	1.3	2.4	81	183	141	144	3.6	4.4	2.6
0	1	4	8	3	1	1	1	0	0	0	0	0	0	0	0	0	0	0	0	0	12	72	39.2	42.2	13.2	14.4	153	226	13.8	22.5	14	25	15	24	27	35	9.3	10	98	106	1.3	2	88	440	131	139	3.5	6.5	1.6
0	0	1	4	6	4	1	1	0	0	0	0	0	0	0	0	0	0	0	0	0	4	79	31.2	35.6	11.1	12.5	179	181	11.6	14.1	8	14	26	27	15	15	8.2	8.9	104	104	0.5	0.6	78	148	136	139	3.4	4.9	1.5
1	1	4	10	15	5	0	3	2	2	0	0	0	1	0	0	0	0	0	0	0	5	60	25	28	8.3	9.3	89	103	27.4	32.5	13	16	17	20	41	52	7.4	7.7	113	115	2.9	3.9	59	104	142	144	4.2	4.9	0.9
0	1	3	3	15	6	0	3	0	0	0	0	0	0	0	0	0	0	0	0	0	3	32	34.9	43.1	11.8	14.2	178	295	8.6	23.1	12	18	19	22	26	26	8.5	9.4	106	106	1.2	1.2	100	148	140	143	3.8	4.1	1.9
0	1	4	2	8	4	2	2	1	0	0	0	0	0	0	0	0	0	0	0	0	6	62	26.1	35.7	9.9	11.5	91	211	4.5	6.9	11	18	21	24	12	16	6.5	7.1	104	112	0.8	1	195	273	140	142	3.5	4.4	1.8
0	1	1	3	14	6	5	3	0	0	0	0	0	0	0	0	0	0	0	0	0	5	51	30.8	38.5	11.3	13	200	234	10	16.9	10	11	26	27	14	18	8.5	8.9	106	108	1.1	1.3	90	90	138	139	4.5	5	0.9
0	1	4	5	3	1	1	1	0	0	0	0	0	0	0	0	0	0	0	0	0	12	60	33.6	36	11.4	12.6	136	156	12.2	17.6	16	18	26	27	52	54	6.7	7.2	108	111	2.4	3	110	203	150	150	3	3.1	2.2
0	1	1	2	14	6	5	3	0	1	0	0	0	0	0	0	0	0	0	0	0	3	92	27.8	31.5	9.1	10.4	162	174	8.5	10.4	12	16	22	24	30	34	8.1	8.9	104	106	1.1	1.3	114	128	137	138	3.9	4.3	0.8
0	0	4	3	9	5	1	3	0	0	0	0	0	0	0	0	0	0	0	0	0	3	55	31.4	33.6	11.3	12	201	247	4.3	7	6	24	31	36	2	6	7.4	8.5	62	84	0.3	0.5	82	213	118	125	2.3	4.4	0.9
1	0	4	2	11	6	1	4	0	0	0	0	0	0	0	0	0	0	0	0	0	3	77	28.8	28.8	8.8	8.8	356	356	17	17	21	21	19	19	55	55	8.6	8.6	98	98	5.9	5.9	181	181	138	138	4.4	4.4	0.9
1	1	4	3	14	6	4	4	0	0	0	0	0	0	0	0	0	0	0	0	0	3	67	27.2	29.3	9.1	9.7	313	343	19.5	22.5	20	21	18	21	22	24	9.4	9.5	94	95	0.4	0.5	85	95	129	132	3.7	3.8	1.1
0	0	1	6	3	1	1	1	1	0	0	0	0	0	0	0	0	0	0	0	0	2	75	33.7	38.9	10.7	12.4	187	269	5.1	13.5	14	16	21	28	15	22	8.6	8.6	101	110	0.9	1.2	97	143	138	141	4.2	4.9	1
0	0	1	3	10	6	1	3	0	0	0	0	0	1	0	0	0	0	0	0	0	15	66	24.1	44.3	7.3	13.2	150	289	4.9	9.6	6	11	19	35	9	20	3.6	9	96	114	0.2	0.7	245	275	139	142	2.3	5.1	1
0	0	4	6	12	6	2	4	0	0	0	0	0	0	0	0	0	0	0	0	0	4	52	22.9	36.7	7.7	13.1	101	146	11.2	24.2	10	13	19	24	10	11	7.6	8.7	108	116	0.6	0.8	81	81	137	142	4.5	5.7	0.9
1	0	1	2	3	1	1	1	0	1	0	0	0	0	0	0	0	0	0	0	0	11	83	24.5	24.5	8.3	8.3	45	45	4.5	4.5	11	11	19	19	41	41	8.2	8.2	119	119	1.3	1.3	80	80	145	145	4.3	4.3	1.7
1	0	1	4	3	1	1	1	2	1	0	0	0	1	0	0	0	0	0	0	0	8	68	28.2	31.4	8.8	9.3	375	449	15.5	17.6	14	15	19	22	25	28	8.9	8.9	111	115	1	1	106	166	142	148	3.8	4.1	0.9
1	1	1	2	9	1	4	4	0	1	0	0	0	1	1	0	0	0	0	0	0	6	88	25.9	29.5	8.9	10.1	47	92	0.6	0.7	15	21	17	23	41	45	8.6	9.6	97	105	1.2	1.7	144	252	134	136	4.5	5.4	1.7
0	1	2	6	8	4	2	2	1	0	1	0	0	0	0	0	0	1	0	0	0	2	80	24.2	27.2	7.4	8.3	191	203	22.4	25.7	12	17	18	22	16	19	7.9	8.3	114	120	0.8	1	63	106	147	149	3	4.2	1.2
0	1	1	5	8	5	1	2	1	0	0	0	0	1	0	0	0	0	0	0	0	21	39	52.8	58.1	16.4	18.2	144	159	6.7	11.2	14	17	36	38	10	11	8.4	9.3	91	95	0.6	1.3	81	96	141	142	3.5	3.9	2.1
0	1	4	3	14	6	5	3	0	0	0	0	0	0	0	0	0	0	0	0	0	4	74	15.4	23.9	5	7.9	29	68	0.6	1.5	11	14	24	25	45	53	7.2	7.7	101	104	4.6	6.1	54	84	137	139	3.8	5.2	0.8
0	0	1	2	8	6	1	1	0	0	0	0	0	0	0	0	0	0	0	0	0	7	84	38.3	38.3	13.1	13.1	234	234	8.8	8.8	14	14	27	27	11	11	9.1	9.1	102	102	0.7	0.7	195	195	139	139	3.5	3.5	1.4
1	1	2	3	3	1	1	1	1	0	0	0	0	0	0	0	0	0	0	0	0	32	92	29.5	30.7	9.8	9.8	138	138	10.9	10.9	10	10	28	28	22	22	8.1	8.1	108	108	1.1	1.1	75	75	142	142	4	4	1.1
0	0	1	9	12	5	4	2	0	0	0	0	0	0	0	0	0	0	0	0	0	9	68	26.1	33.4	8.9	11.1	182	285	12.2	14.6	10	12	26	26	26	46	7.5	7.8	110	116	1	1.8	132	172	143	148	4.3	4.7	1.4
0	1	1	5	3	1	1	1	0	0	0	0	0	0	0	0	0	0	0	0	0	10	51	39.4	41.1	14.2	15.2	228	265	11	13.4	11	15	22	27	11	12	8.3	8.9	100	105	0.8	0.8	105	169	133	140	3.3	3.6	2.3
1	1	1	3	14	6	5	3	0	1	0	0	0	1	0	0	0	0	0	0	0	5	75	28.2	28.7	9	9.1	229	231	9.2	9.3	27	29	11	14	69	72	7.2	8	107	111	3.7	3.8	112	220	143	147	4.8	5.6	1.4
0	0	1	2	14	6	5	3	0	0	0	0	0	0	0	0	0	0	0	0	0	2	48	31.7	37.1	11.2	12.9	196	199	9.1	11.3	14	16	24	24	11	14	7.7	9	107	109	0.6	0.7	102	177	143	147	3.7	4.1	1.4
0	1	1	3	3	1	1	1	0	0	0	0	0	0	0	0	0	0	0	0	0	20	86	23	36.8	7.8	11.5	108	179	10.3	15.4	10	10	20	20	13	14	8.1	8.1	108	115	0.7	0.8	134	134	136	136	4.6	4.6	1.7
0	0	1	4	13	6	4	3	1	0	0	0	0	1	0	0	0	0	0	0	0	2	63	35.3	40.4	11.8	13.4	236	309	21.9	29.5	13	18	16	25	13	18	8.3	8.8	104	107	0.9	1.1	141	393	140	142	3.6	5.4	1.3
0	1	4	6	10	6	1	3	0	1	0	0	0	1	0	0	0	0	0	0	0	34	68	25.3	37.2	8.4	11.8	32	121	2.6	10.5	14	19	11	19	15	25	6.7	8.7	111	122	1.2	2.7	120	197	146	147	3.5	4.8	3
0	0	1	4	11	6	2	3	0	1	0	1	0	1	0	0	0	0	0	0	0	2	82	37.5	39.7	12.4	13.3	341	434	13.9	22.8	12	17	18	25	13	16	9.3	9.9	97	109	0.9	1	90	543	133	146	3.4	5.8	1.5
0	1	1	6	14	6	4	4	0	0	0	1	0	0	0	0	0	0	0	0	0	3	68	35.7	45.7	11.7	14.2	300	374	12.7	20.7	14	15	22	22	40	46	8.4	9	101	104	1.3	1.6	131	156	138	140	4.4	4.9	1.4
0	0	2	2	15	6	5	4	0	0	0	0	0	1	0	0	0	0	0	0	0	4	63	32.8	35.9	11.1	12.2	73	80	6.8	6.9	9	12	23	26	6	6	7.9	8.9	110	114	0.6	0.7	115	123	142	145	3.4	3.7	1.7
1	0	4	4	15	1	0	1	0	0	0	0	0	0	0	0	0	0	0	0	0	2	23	33.6	51.6	11.5	17.1	158	201	18.7	30.6	16	27	11	20	4	18	7.8	8.5	111	124	0.5	0.8	153	381	144	156	2.9	4.5	3.8
0	0	1	2	15	6	5	4	0	0	0	0	0	0	0	0	0	0	0	0	0	2	60	37.7	38.3	12.2	12.7	144	147	12.7	14.9	12	16	16	18	12	19	7.9	9.3	107	111	0.6	0.8	243	330	135	138	3.5	4	0.9
0	1	4	3	7	5	1	1	0	1	0	0	0	0	0	0	0	0	0	0	0	4	70	29.3	30	10.1	10.5	221	230	9.2	9.7	14	14	27	28	6	7	8.5	8.6	91	92	0.6	0.6	130	148	129	129	4.1	4.2	1.5
0	1	3	5	3	1	1	1	1	0	0	0	0	0	0	0	0	0	0	0	0	17	45	36.6	45.5	12.9	15.7	118	178	6.9	15.7	12	23	15	22	13	21	6.6	7.9	109	117	0.9	1.5	100	138	142	146	4	5.4	3.5
1	0	1	3	14	6	5	3	0	0	0	0	1	0	0	0	0	0	0	0	0	3	61	34.1	34.1	11.5	11.5	142	142	8.7	8.7	18	18	24	24	15	15	8.4	8.4	93	93	0.7	0.7	98	98	135	135	4.2	4.2	0.7
0	1	4	2	9	4	2	3	0	1	0	0	0	0	1	0	0	0	0	0	0	4	34	35.3	39.6	11.8	13.5	72	103	12.9	15.9	11	14	21	23	18	20	8	8.4	101	104	1	1.1	104	123	136	138	3.5	4.4	1.2
1	1	1	2	13	6	4	3	1	1	0	0	0	0	0	0	0	0	0	0	0	2	88	33.5	35.1	10.9	11.3	105	118	14.9	15.2	16	26	14	17	21	33	8.9	9.3	102	108	0.9	1.5	82	106	137	137	4.3	5.4	2.9
0	1	3	8	13	6	4	3	0	0	0	0	0	0	0	0	0	0	0	0	0	2	80	35	41.4	11.7	14.2	135	161	7.9	24.3	15	19	20	21	43	48	7.6	7.6	105	111	1.4	1.5	118	155	141	142	3.5	3.9	1.8
0	0	4	4	3	1	1	1	0	1	0	0	0	1	0	0	1	0	0	0	1	22	40	22.9	33.6	6.9	10.1	23	80	1.1	4.1	19	25	7	15	6	15	6.1	8.4	109	114	0.8	1.3	46	121	135	142	3.2	4.7	5.3
0	1	1	2	14	6	5	3	0	1	0	0	0	1	0	0	0	0	0	0	0	3	72	29.8	34.1	9.6	10.7	233	268	7.4	10.7	17	21	22	25	79	81	8.9	9.6	99	99	3.1	3.2	117	146	136	137	4.6	4.6	1.3
1	1	1	6	12	5	4	2	0	0	1	0	0	1	0	0	0	0	0	0	0	3	76	26.8	30	8.6	9.4	133	139	13.1	16	14	24	19	26	29	33	6.6	8.7	99	110	3.1	4	120	165	136	145	3.4	4.6	2.7
0	0	1	3	15	6	0	4	0	0	0	0	0	0	0	0	0	0	0	0	0	4	58	28.4	31.5	9.1	10.4	256	353	8.3	17.3	12	18	18	20	75	82	8.4	8.4	109	114	2.4	2.6	101	133	137	142	4.8	5.6	0.6
1	0	1	4	10	1	5	1	0	0	0	0	0	0	0	0	0	0	0	0	0	3	59	32.2	33.9	10.7	11.4	236	254	7.2	8.2	13	14	24	26	17	18	8.2	8.3	109	111	0.8	1	103	146	144	145	3	4.5	1.5
0	1	1	4	12	6	2	4	0	0	0	0	0	0	0	0	0	0	0	0	0	9	84	23.2	35.3	8	12	139	216	6.8	20.7	11	12	19	29	12	13	9.2	9.2	103	114	0.7	0.9	87	102	138	138	4.6	4.8	1.1
0	1	1	2	10	5	4	1	0	0	0	0	0	0	0	0	0	0	0	0	0	2	72	16.2	31.3	5	10.7	272	354	9.9	15.8	13	17	19	20	16	29	8.1	8.5	105	113	0.8	1.2	67	165	137	142	3.4	4.4	1.1
1	1	1	5	3	1	1	1	1	0	0	0	0	0	0	0	0	0	0	0	0	20	85	34.7	36.6	11.1	11.8	137	145	5.3	9.4	10	14	18	22	25	28	7.5	8	101	106	1.2	1.2	130	395	133	138	3.7	3.7	0.9
1	0	4	9	12	4	5	1	1	0	0	0	0	0	0	0	0	0	0	0	0	3	37	39.6	43.9	13.3	14.5	226	290	23.6	32.6	13	18	16	17	10	18	7.3	8.5	105	133	0.9	1.4	131	333	137	158	3.4	5.5	1.8
0	1	1	2	15	6	5	4	0	0	0	0	0	0	0	0	0	0	0	0	0	2	87	18.6	31.5	6.2	10.7	168	351	16.1	23	14	19	23	24	23	50	7.3	7.3	96	101	0.5	1.7	162	210	132	147	2.6	5.7	2.2
0	1	1	2	14	6	4	4	1	0	0	0	0	0	0	0	0	0	0	0	0	4	69	25.3	36.3	8.5	12.4	133	196	7.8	17.6	10	14	25	28	13	17	8.4	9	103	107	1.1	1.4	85	141	140	145	3.9	4.3	0.8
0	1	1	3	14	6	5	3	1	0	0	0	0	0	0	0	0	0	0	0	0	2	60	28	38	9.7	12.9	150	179	12.6	14.8	12	13	23	23	21	22	8.4	8.7	110	112	1	1.1	108	108	141	142	4	4.8	1.1
1	1	1	5	8	3	1	4	0	0	0	0	0	0	0	0	0	0	0	0	0	7	79	25.2	33.5	8.8	11.6	146	226	8.5	15.8	11	15	26	27	29	38	8.2	8.3	104	108	1.2	1.4	74	287	140	142	3.9	4.5	3.4
1	1	4	4	5	3	1	1	0	2	0	0	0	0	0	0	0	0	0	0	0	19	67	34.4	41.3	10.8	12.9	120	129	11.5	17.5	13	17	20	23	70	77	8.5	8.7	99	102	2.4	3	152	237	134	140	4.2	4.9	1.4
0	1	4	9	8	5	1	1	0	0	0	0	0	0	0	0	0	0	0	0	1	9	65	21.5	35.4	6.5	10.4	124	216	30.1	41.7	28	35	11	17	44	56	6.4	7.8	98	101	1.9	2.3	126	353	138	140	4.1	6.3	10.8
0	0	4	4	15	6	5	4	0	0	0	0	0	0	0	0	0	0	0	0	0	2	34	24.7	33.9	8.2	11.1	104	165	1.7	38.3	15	18	20	23	7	10	6.6	8.2	100	103	0.6	0.8	93	137	132	137	3.2	4.1	2.8
0	1	4	3	13	6	4	3	0	0	0	0	0	0	0	0	0	0	0	0	0	6	78	28.1	30.6	9.1	9.7	369	437	9.9	10.7	23	24	19	19	54	59	8.8	8.8	101	102	2.5	2.9	131	133	139	140	4.4	4.5	1.4
0	1	1	8	7	4	1	2	0	0	0	0	0	0	0	0	0	0	0	0	0	10	68	29.5	33	9.4	10.4	110	175	11.8	22	25	29	15	17	63	76	7	7.2	104	109	6.6	7	83	146	144	145	4.8	5.2	8.2
0	0	1	3	15	6	5	4	0	0	0	0	0	0	0	0	0	0	0	0	0	2	64	27	37.6	8.6	12.4	243	381	6.8	10.5	12	14	24	32	11	18	7.2	9.3	97	110	0.5	0.8	62	106	138	142	3.7	4.6	1
0	1	4	3	14	6	5	3	0	0	0	0	0	0	0	0	0	0	0	0	0	2	62	39.5	41.1	12.6	13.3	100	107	15.2	16	11	15	22	22	9	11	7.7	8.3	107	107	0.8	0.8	87	90	137	140	3.4	3.5	2.8
0	1	4	4	11	6	1	4	2	1	0	0	0	0	0	0	0	0	0	0	0	11	72	28.3	33.4	8.9	10.2	333	430	15.9	27.4	15	16	21	22	41	50	8.2	8.4	98	98	2.1	2.6	54	120	135	136	3.7	3.9	1.2
0	0	1	3	15	1	0	1	0	0	0	0	0	0	0	0	0	0	0	0	0	2	63	25.8	34.2	8.2	11.2	174	204	7.8	14.1	9	10	25	29	17	20	8.6	8.9	105	112	0.7	0.7	94	94	139	142	4.1	4.7	1.1
0	1	1	5	14	6	5	3	1	0	0	0	0	0	0	0	0	0	0	0	0	2	65	30.9	36.9	10.4	12.8	81	127	9.8	14.9	11	11	26	27	12	13	8.2	8.2	107	108	0.7	0.8	126	126	139	141	3.6	3.9	1.2
0	1	1	5	14	6	5	3	0	0	0	0	0	0	0	0	0	0	0	0	0	4	69	32.3	42.6	11.1	14	173	210	15.3	31.7	15	17	21	23	21	21	7.8	8.1	106	108	1.2	1.4	126	126	138	138	4.9	5.7	1.3
0	1	1	3	14	6	5	3	1	1	0	0	0	1	0	0	0	0	0	0	0	3	56	24.2	27.9	8.8	10.1	51	107	10.1	21.7	8	12	26	32	31	57	6.9	7	79	96	0.7	1.1	99	147	119	130	3.4	3.9	1.5
0	1	1	3	14	6	5	3	1	0	0	0	0	0	0	0	0	0	0	0	0	2	70	44.2	51.6	13.6	16.2	262	548	23	24.9	14	16	21	26	14	15	6.6	7.3	94	105	0.6	0.7	152	174	132	136	3.7	4.2	2.5
0	1	1	3	14	6	4	4	0	0	0	0	0	0	0	0	0	0	0	0	0	2	44	36.6	37.5	12.2	12.6	82	99	3.8	17	11	12	20	22	17	23	8.3	8.6	104	113	0.9	1.2	96	119	136	146	3.9	4.5	2
0	1	1	3	14	6	5	3	1	1	0	0	0	0	0	0	0	0	0	0	0	2	80	35.3	43.4	10.6	13.6	174	241	6.1	14.6	13	16	15	21	22	26	8.1	8.2	103	106	1.2	2	126	195	135	139	4.6	5.5	1.3
0	1	2	4	13	6	4	3	0	0	0	0	0	0	0	0	0	0	0	0	0	2	82	23.3	29.9	6.9	7.6	108	139	8	9.1	13	17	26	29	17	17	7.9	8.1	103	104	1.8	1.9	141	174	141	142	3.8	4.5	1.6
1	0	1	8	10	6	1	3	0	0	0	0	0	0	0	0	0	0	0	0	0	14	62	11.2	25.6	3.5	8.5	28	54	3	9.2	12	17	17	22	42	44	8.5	9.6	94	97	1	1.2	87	117	124	134	3.4	4.6	2.2
0	1	1	5	14	6	5	3	0	1	0	1	0	0	0	0	0	0	0	0	0	2	58	35.7	38.8	10.9	12	30	39	2.1	4.4	5	8	26	32	5	5	7.7	7.8	101	105	0.5	0.6	113	131	137	138	3.9	4.1	1
0	1	1	4	13	6	4	3	0	2	0	0	0	1	0	0	0	0	0	0	0	9	62	26.1	29	8.9	9.6	63	68	6.5	7.6	16	19	16	17	11	12	7.6	8.1	107	110	1.5	1.5	81	103	136	140	3.8	3.9	0.6
0	0	1	6	9	6	1	2	0	0	0	0	0	0	0	0	0	0	0	0	0	2	64	22.3	25.6	7.3	8.6	184	217	4.6	6.3	12	17	18	25	79	85	8	8.4	105	108	3.4	3.6	139	247	134	140	4.7	5.3	0.7
0	1	1	2	14	6	5	3	0	1	0	0	0	0	0	0	0	0	0	0	0	3	35	42.9	47.1	15.5	16.3	182	222	13	22.8	11	12	25	29	11	16	8.7	9.4	103	105	0.9	0.9	89	151	138	139	4.4	4.4	0.8
0	1	1	3	12	5	4	3	0	0	0	0	0	1	0	0	0	0	0	0	0	4	77	31.4	33.2	10.1	10.7	191	204	16	18.3	13	20	24	25	45	51	8.8	9.6	100	101	2.1	2.3	116	158	139	144	3.7	4.4	1.6
0	1	1	3	14	6	5	3	1	0	0	0	0	0	0	0	0	0	0	0	0	2	52	31.2	34.7	11.5	12.1	101	101	13.7	15	11	11	23	23	11	14	7.5	7.6	106	110	0.7	0.7	137	137	136	140	3.7	4.9	1.3
0	1	1	6	13	5	4	4	3	0	0	0	0	0	0	0	0	0	0	0	0	4	57	28.1	33.5	8.8	10.3	191	315	5.9	17.5	9	13	35	40	27	28	7.8	8.4	93	97	1.1	1.2	101	133	138	141	3.7	4.1	0.8
0	0	2	3	11	6	2	3	1	0	0	0	0	0	0	0	0	0	0	0	0	3	54	32.2	33.4	10.6	10.8	151	179	5.9	12.4	13	17	18	26	15	16	7.3	8.9	106	111	0.6	0.7	116	169	139	142	3.8	3.9	1.5
0	1	1	3	14	6	5	3	0	1	0	0	0	1	0	0	0	0	0	0	0	2	76	27.4	33.3	9.4	10.6	93	139	7.5	9.6	15	15	23	24	11	13	7.8	7.8	103	103	0.7	0.7	101	101	138	138	3.9	4.2	0.9
0	1	1	5	15	6	5	4	3	0	0	0	0	0	0	0	0	0	0	0	0	2	66	31.5	37.3	11	13.1	132	153	5.4	9.2	7	10	25	30	15	18	8.7	8.7	102	110	1	1.2	98	102	136	140	3.7	4.3	0.7
0	0	1	5	14	6	5	3	0	1	0	0	0	0	0	0	0	0	0	0	0	2	75	22.3	29.9	7.4	10.2	102	134	7	12.4	8	10	33	35	28	29	7.2	7.5	100	103	1.1	1.1	75	94	139	141	3.6	4.3	1.1
0	1	4	5	3	1	1	1	0	1	0	0	0	0	0	0	0	0	0	0	0	14	34	31.2	41.5	10	13.6	150	200	13.7	20.3	10	13	19	22	15	20	7.4	7.8	106	114	0.5	1	92	115	140	144	4.1	5.8	1
0	1	1	2	14	6	4	4	0	1	0	0	0	0	0	0	0	0	0	0	0	5	33	34.2	37.4	11.3	12.3	152	159	13.2	14	8	14	17	19	10	22	5.5	6.8	107	109	0.7	1.5	124	167	134	139	3.5	4.7	0.9
0	1	4	5	11	6	2	3	1	0	0	0	0	0	0	0	0	0	0	0	0	3	62	29.9	31.4	9.9	10.7	112	151	15.8	23.1	10	14	25	28	18	23	8.7	8.9	99	106	0.6	0.7	95	165	134	140	4.4	4.5	2
0	1	2	2	15	6	0	4	0	0	0	0	0	0	0	0	0	0	0	0	0	2	44	20.4	27.1	6.6	8.8	121	136	7.7	9.3	20	21	18	20	52	55	6.1	7.5	103	105	2.4	2.6	74	127	139	140	4.1	4.3	1.5
0	0	1	2	12	4	5	3	0	0	0	0	0	1	0	0	0	0	0	0	0	4	24	29.5	32.3	9.9	10.8	67	67	10.8	12.3	12	14	23	26	14	15	7.5	7.8	104	104	0.6	0.6	118	140	137	138	3.5	3.8	1.5
0	1	2	3	9	4	1	4	0	0	0	0	0	0	0	0	0	0	0	0	0	6	90	18	22.1	5.6	6.8	132	154	18.4	21.5	18	21	24	25	164	170	8.8	8.8	99	103	2.7	2.8	194	296	140	142	3.9	4.1	2.3
0	1	4	2	14	6	5	3	0	1	0	0	0	0	0	0	0	0	0	1	0	2	33	35.2	37.7	12.1	12.9	183	211	9.6	12.5	12	16	21	24	18	19	8.4	8.9	105	109	0.8	0.9	102	152	138	141	3.8	4	1.4
1	1	4	2	3	1	1	1	0	1	0	0	0	1	0	0	0	0	0	0	0	20	88	20.1	28.9	6.5	9.7	79	130	15.6	24	12	15	18	19	45	54	7	7.7	118	120	0.9	1.1	136	203	144	148	3.8	4.1	2.6
1	0	4	2	15	1	0	1	0	0	0	0	0	0	0	0	0	0	0	0	0	5	37	42.3	47.5	14.9	15.8	162	190	10.8	15.6	9	16	23	27	12	18	8.4	9.4	100	106	0.5	0.7	104	187	132	146	3.7	7.6	0.8
0	1	1	3	14	6	4	4	0	1	0	0	0	0	0	0	0	0	0	0	0	2	88	25.8	28.9	8.5	10.2	112	150	6	12.3	12	15	18	23	37	56	6	7.6	101	117	1.3	1.9	97	800	134	144	3.7	4.5	1
1	1	4	13	3	1	1	1	0	1	1	0	0	0	0	0	0	0	0	0	1	15	51	31.1	33.7	11.1	11.6	70	80	10.7	10.7	15	16	20	22	25	31	6.5	7.3	93	100	2.4	3.3	150	230	131	136	4.3	4.7	1.4
0	1	1	3	14	6	5	3	0	0	0	0	0	0	0	0	0	0	0	0	0	2	77	28.1	33.9	9.3	11.5	143	202	6.1	11.9	11	13	22	22	30	31	8.1	8.1	109	110	1.5	1.6	119	164	139	140	3.5	3.6	1.1
0	1	1	7	3	1	1	1	0	0	0	0	0	0	0	0	0	0	0	0	0	35	72	21.9	29.4	6.9	10.3	126	187	16.1	25.1	12	13	22	23	14	17	8	8	100	104	0.7	0.9	118	118	130	136	3.6	4.6	1.4
1	1	1	5	8	4	1	3	0	0	0	0	0	1	0	0	0	0	0	0	0	10	73	35.4	37.3	10.4	10.9	216	232	22.9	26.8	13	16	21	26	21	22	7.5	7.8	101	102	1	1.2	149	160	139	140	4.5	4.5	1.6
0	1	2	4	14	6	4	4	0	0	0	0	0	0	0	0	0	0	0	0	0	3	48	34.1	34.3	11	11.7	201	201	9.3	9.7	16	19	22	25	10	11	7.9	8.8	94	101	0.9	1.2	60	74	138	139	3.3	4.9	1.5
0	1	1	6	3	1	1	1	1	0	0	0	0	1	0	0	0	1	0	0	0	2	84	20.6	22.1	6.6	7	247	268	12.8	18.3	7	15	19	25	26	35	8	8.2	103	105	0.6	0.7	141	145	138	140	3.7	4.1	1.2
0	0	1	3	14	6	5	3	2	0	0	0	0	0	1	0	0	0	0	0	0	2	50	25.9	28	8.3	9.1	77	87	3.2	5.6	11	13	18	21	9	15	6.7	7.2	111	115	0.7	0.8	93	105	141	142	3.3	3.9	1.1
0	1	1	3	14	6	4	4	2	0	0	0	0	0	0	0	0	0	0	0	0	2	27	30.5	38.6	10.3	13	167	206	12.1	21.2	7	14	18	29	11	14	8	8.1	103	109	1	1.1	107	140	135	137	4.3	4.4	3.6
0	1	4	3	15	6	5	4	1	0	0	0	0	0	0	0	0	0	0	0	0	2	64	33	37.7	11.3	12.5	144	152	11.4	13	12	12	23	24	10	13	7.6	7.6	107	112	0.7	0.8	131	131	138	138	4.5	4.5	1
0	1	1	11	3	1	1	1	1	0	0	0	0	0	0	0	0	0	0	0	0	7	40	38.1	38.9	12.8	13.2	237	310	24.1	46.2	10	14	20	27	14	24	6.9	8	104	108	1.3	2	118	326	134	141	4	6.6	0.8
1	1	4	2	3	1	1	1	0	0	0	0	0	0	0	0	0	0	0	0	0	7	76	27.1	42.6	8.9	13.5	133	250	11.7	19.1	15	19	22	24	21	24	8.5	8.9	101	102	1.3	1.6	148	185	135	137	4.7	5.5	1.7
1	0	1	7	15	5	0	3	1	0	0	1	0	0	0	0	0	0	0	0	0	7	80	31.5	31.5	10.2	10.2	309	309	12.2	12.2	8	8	24	24	18	18	9.1	9.1	112	112	0.7	0.7	108	108	140	140	3.9	3.9	1.2
0	1	1	7	14	6	5	3	0	0	0	0	0	0	0	0	0	0	0	0	0	2	70	24.6	35.1	8.2	12.6	62	122	7.1	10.3	15	20	21	23	13	15	8.9	9.1	106	107	1	1.3	121	121	139	145	3.2	4.5	2
0	1	1	5	14	6	5	3	0	0	0	0	0	0	1	0	0	0	0	0	1	2	63	23.1	25.2	8.1	8.6	119	125	18.9	23.6	15	19	26	30	42	49	8.4	8.7	93	99	2.6	3	200	250	134	140	3.2	3.8	0.8
0	1	1	3	3	1	1	1	0	0	0	0	0	0	0	0	0	0	0	0	0	2	64	31.7	36.7	11.3	13	102	125	9.7	16.1	11	13	24	25	12	16	8.8	8.8	106	108	0.7	0.9	97	97	139	140	3.9	4	1.4
1	1	4	4	15	4	0	2	0	1	0	1	0	1	0	0	0	0	0	0	0	2	94	31.8	34.9	10	10.8	126	130	6.6	8.8	6	8	26	33	42	46	7.4	7.4	106	112	1.1	1.2	45	117	145	145	4.1	6.2	1.5
0	0	1	3	15	6	5	4	2	0	0	0	0	0	0	0	0	0	0	0	0	2	60	33.6	36.6	10.9	11.5	347	460	10.9	15.9	16	21	17	21	10	11	9.1	9.1	98	104	0.8	1	79	90	131	137	3.5	4.9	5
0	0	1	7	12	6	2	4	0	1	1	0	0	1	0	0	0	0	0	0	0	5	44	31.8	34.9	10.2	12.1	129	198	5.6	5.9	11	14	18	20	14	19	7.6	7.9	119	123	0.9	1.2	90	143	147	150	2.8	3.3	1.3
0	1	4	6	3	1	1	1	0	0	0	0	0	0	1	0	0	0	0	0	0	12	28	40.3	47.6	13.4	15.7	278	309	9.6	21.7	12	14	19	23	18	20	8.2	8.3	109	110	1	1.4	97	129	142	144	4.2	4.6	1.4
1	1	1	7	15	1	0	1	0	0	0	0	0	0	0	0	0	0	0	0	1	4	77	17.2	32.2	5.4	10.5	59	93	11	29.1	14	32	11	26	44	78	7.7	9.1	94	105	1.4	2.2	92	200	135	142	3.7	7	7.9
0	0	1	6	6	4	1	1	0	1	0	0	0	1	0	0	0	0	0	0	0	9	62	34.8	48.1	13	15.4	195	300	5.6	8.3	15	25	16	19	48	54	7.6	9.6	97	107	3.3	4.6	84	123	133	137	4.6	4.9	2.5
0	1	4	4	13	6	4	3	0	0	0	0	0	0	0	0	0	0	0	0	0	4	46	40.7	43.6	13	13.9	168	190	6.3	6.9	6	15	18	24	6	13	6.5	7.6	105	113	0.8	1.3	79	352	135	142	3.2	4	1.4
0	0	4	3	10	6	1	3	0	0	0	0	0	0	0	0	0	0	0	0	0	8	78	35.4	35.4	12.4	12.4	109	109	7.9	7.9	18	18	24	24	49	49	8.5	8.5	102	102	5.3	5.3	156	156	140	140	4.4	4.4	1
1	1	1	4	10	5	4	1	4	0	0	0	0	0	0	0	0	0	0	0	0	4	81	27	31.3	9.5	9.5	101	101	7.5	7.5	10	11	25	25	30	30	8.2	8.9	111	111	1.2	1.2	115	193	142	143	3.8	4.3	1.5
1	0	1	3	7	4	1	2	0	0	0	0	0	0	0	0	0	0	0	0	0	3	76	23.8	27.5	7.8	9.1	179	194	12.5	15.6	15	17	9	17	10	17	4.7	7.7	109	118	0.4	0.8	106	151	137	141	2.9	4	1.1
0	0	1	3	14	6	5	3	1	0	0	0	0	0	0	0	0	0	0	0	0	5	70	32.5	34.2	11.2	11.2	172	172	6.8	6.8	11	12	25	26	19	23	8.1	8.8	106	110	0.9	1	91	109	139	143	3.6	4.3	0.6
0	1	2	6	15	6	5	4	1	0	0	0	0	0	0	1	0	0	0	0	0	2	71	27.4	40	8.9	12.7	160	310	8.2	12.9	8	16	26	31	18	22	6.1	7	99	110	1	1.2	94	155	140	142	4	4.6	0.8
1	0	1	3	7	4	1	2	0	1	0	0	0	0	1	0	0	0	0	0	0	12	66	23.9	32.6	7.4	9.7	253	410	49.3	59.8	15	19	18	19	17	19	8.8	9	100	104	0.7	0.8	147	223	137	138	4	4.1	1.5
0	0	1	2	13	6	4	3	0	0	0	0	0	1	1	0	0	0	0	0	0	2	92	40.8	41.7	13.1	13.1	294	330	13.5	14.8	18	19	24	26	23	24	8.6	8.6	106	106	0.8	0.8	118	124	144	147	3.3	4.4	1.9
0	0	1	2	11	6	1	4	0	0	0	0	0	0	0	0	0	0	0	0	0	5	57	28.8	28.8	9.1	9.1	323	323	14.8	14.8	13	13	21	21	11	14	8.3	8.4	114	116	0.6	0.6	145	201	144	146	3.9	4.1	1.1
0	1	1	2	15	6	5	4	0	0	0	0	0	0	0	0	0	0	0	0	0	6	64	34.3	37.2	11.3	12.5	165	180	9.1	12.3	9	9	21	24	14	15	7.8	8.2	108	115	0.8	0.9	131	131	136	141	4.3	5.6	1.8
1	0	4	3	3	1	1	1	0	1	0	0	0	0	0	0	0	0	0	0	0	5	70	44.6	44.8	14.1	14.2	181	202	21	21.8	15	15	23	25	40	41	7.8	7.9	99	101	0.9	1	154	215	134	134	4.7	5.2	1.8
0	1	1	3	13	6	3	4	0	0	1	0	0	0	0	0	0	0	0	0	0	2	92	36	40.8	12.3	13.5	113	125	4.5	6.6	17	19	20	24	35	44	7.7	7.9	101	103	2.1	2.5	117	249	135	139	4.5	5.3	1.1
0	1	1	5	3	1	1	1	0	0	0	0	0	0	0	0	0	1	0	0	0	10	60	31.1	33.6	8.9	9.5	149	168	225.3	243.6	14	24	13	16	30	41	6.9	7.7	98	103	2.1	3.7	98	180	128	133	4	5.7	0.6
0	1	1	8	10	5	3	2	0	1	0	0	0	1	0	0	0	0	0	0	0	2	71	25.8	33.5	8.5	11.3	150	240	6	13.8	12	15	18	24	36	38	6.6	7.2	106	110	2.4	2.9	217	260	135	138	4.8	5.2	1.1
1	1	2	10	8	5	1	2	1	1	0	0	0	1	0	0	0	0	0	0	0	9	48	9.1	28.3	2.8	10	107	158	6	9.4	19	31	11	20	22	28	8	9.2	99	105	1.8	2.4	88	149	141	144	4.1	4.3	3
1	0	4	3	13	6	4	3	0	1	0	0	0	1	0	0	0	0	0	0	0	6	75	32.5	37.5	10.6	12.4	151	164	10.3	12.2	22	23	13	14	88	97	7.5	7.6	97	99	1.8	1.9	100	127	128	130	4.8	5.4	2.1
0	1	1	4	15	6	5	4	0	0	0	0	0	0	0	0	0	0	0	0	0	3	82	24.5	40.2	8.8	12.1	131	160	12.4	18.2	7	11	24	30	24	30	8	8	101	111	1	1.2	100	132	136	139	4.1	4.6	0.8
1	1	1	2	8	5	1	2	0	0	0	0	0	0	1	0	0	0	0	0	0	2	94	30.7	31.7	9.3	9.8	154	177	8.4	9.6	15	18	29	34	108	115	8.2	8.8	99	101	3.2	3.5	69	81	142	143	5.1	5.6	2.6
0	0	1	9	15	6	5	4	0	0	0	0	0	1	0	0	0	0	0	0	0	5	35	23.8	24.4	8.3	8.4	175	176	32.4	35.6	12	14	17	17	17	18	8.5	8.7	93	95	1.1	1.2	95	159	120	120	3.5	4	0.9
0	1	4	3	13	6	4	3	1	0	0	0	0	0	0	0	0	0	0	0	0	5	75	33.9	35.9	11.3	11.9	232	236	11.4	11.9	13	13	22	22	7	13	8	8	106	106	0.7	0.9	128	128	137	137	3.7	3.7	2.8
0	0	1	3	3	1	1	1	0	1	1	0	0	0	0	0	0	0	0	0	0	13	55	28.8	29.9	10	10.8	205	218	2.1	5.9	11	14	19	23	13	27	7.4	8.2	101	114	0.5	0.9	100	144	134	141	3	3.5	2.2
0	1	2	2	14	6	5	3	0	1	0	0	0	0	0	0	0	0	0	0	0	7	29	35.3	35.3	11.3	11.3	276	276	10.8	10.8	16	16	23	23	5	5	8.9	8.9	100	100	0.7	0.7	95	95	139	139	4.3	4.3	0.7
0	1	1	2	3	1	1	1	1	2	0	0	0	1	0	0	0	0	0	0	0	9	40	26.7	31.1	8.6	10	188	219	23.5	58.8	12	16	18	24	33	36	7.5	7.7	97	103	0.8	1.2	153	361	130	133	5.4	5.8	1.5
0	1	1	2	3	1	1	1	0	1	1	0	0	0	0	0	0	0	0	0	0	17	35	35.7	48.8	12.2	16.3	214	348	16.2	26.5	12	17	22	25	13	23	7.8	8.1	104	112	0.9	1.2	163	199	142	144	3.4	3.6	1.6
0	1	1	4	13	6	4	3	0	0	0	0	0	0	0	0	0	0	0	0	0	2	66	20.5	28.2	6.4	8.7	172	190	19	20.7	14	18	26	28	70	72	8.1	8.3	96	99	1.8	2	150	197	134	136	4.8	5.2	1.7
0	1	1	4	14	6	5	3	0	0	0	0	0	0	0	0	0	0	0	0	0	4	76	34.9	37.4	11.2	12.5	251	257	4.1	6.4	10	13	27	30	16	22	7.3	7.7	100	104	1.1	1.3	132	137	136	141	3.7	3.9	1.6
0	1	4	4	5	1	1	3	0	0	0	0	0	0	0	0	0	0	0	0	0	21	44	38.5	43.4	12.5	14.7	210	309	17.4	29.3	13	27	17	31	10	11	6.2	9.6	101	109	0.6	1.1	188	325	140	148	2.9	4.5	1.2
0	0	1	4	15	6	0	3	0	0	0	0	0	0	0	0	0	0	0	0	0	6	63	27.9	29.9	9.7	10.4	336	462	10	14.1	7	8	35	36	17	18	8.9	9.1	91	92	0.5	0.6	182	200	130	131	4.3	4.4	0.9
0	1	1	3	13	6	4	3	0	1	1	0	1	0	0	0	0	0	0	0	0	3	90	22.1	26.8	7.5	8.5	164	168	11.5	17.2	11	14	25	27	28	31	8	8	90	91	1.2	1.4	124	164	122	127	4	4.1	1
0	1	1	7	3	1	1	1	0	0	0	0	0	0	0	0	0	0	0	0	0	7	77	22.3	32.3	7.7	10.3	138	212	10.4	16.7	11	11	25	25	20	24	8.7	8.4	108	111	0.7	1	116	116	139	142	3.6	4.6	1.2
0	1	1	6	14	6	4	4	0	0	0	0	0	1	0	0	0	0	0	0	0	4	74	26.1	31	8.2	10.2	196	221	14.8	20.7	12	12	20	25	19	24	11.3	11.3	107	112	0.9	1	122	175	139	140	4.3	5	1.4
0	0	4	2	14	6	5	3	0	0	0	0	0	0	0	0	0	0	0	0	0	2	73	28.2	32.4	9.8	11.2	154	171	6.6	10.5	9	16	18	19	24	27	6.5	7.2	107	111	0.6	0.7	130	170	134	137	3.7	4.3	2.1
0	1	1	7	15	6	5	4	0	0	0	0	0	0	0	0	0	0	0	0	0	4	64	25.2	29.2	7.5	8.8	278	292	20.7	25.5	8	10	21	25	63	66	8.3	8.3	102	104	2.3	2.4	73	73	133	133	5.2	5.2	0.7
0	0	4	4	14	6	5	3	0	0	0	0	0	0	0	0	0	0	0	0	0	5	90	32.3	34.8	9.7	10.8	379	444	13.7	14.5	12	18	32	32	62	63	8.7	10.2	95	100	2.5	2.9	120	122	140	141	4	4.1	2.2
0	0	4	2	12	6	2	4	0	0	0	0	0	0	0	0	0	0	0	0	0	8	83	30.8	31.1	10.4	10.7	322	332	12.3	13.1	16	19	21	25	20	23	8.9	9	102	105	0.6	0.7	130	134	137	140	4	4.5	1
0	0	2	3	11	6	1	4	0	0	0	0	0	0	0	0	0	0	0	0	0	3	66	25.3	25.3	8.2	8.2	407	407	12.9	12.9	12	12	22	22	8	8	8.8	8.8	105	105	0.7	0.7	132	132	135	135	4.1	4.1	1.2
0	1	1	3	3	1	1	1	1	0	0	0	0	0	0	0	0	0	0	0	0	20	64	36.2	42.3	12.8	14.8	180	204	13.5	16.8	12	15	23	25	10	14	7.7	8.2	103	108	0.8	0.9	107	164	136	141	3.6	4.6	1.4
0	1	4	3	14	6	5	3	0	1	0	0	0	0	0	0	0	0	0	0	0	3	55	26	32.3	8.6	11.1	50	57	2	4.1	10	10	23	23	19	19	7.4	7.4	109	109	0.8	0.8	111	111	139	139	3.4	3.4	1.4
1	0	1	2	13	5	4	4	0	0	0	0	0	0	0	0	0	0	0	0	0	14	84	31.5	36.4	10.5	12.4	206	256	18.2	25	11	12	24	27	19	20	8	8.5	96	104	0.8	0.9	116	145	131	136	4.1	4.3	1.5
0	0	1	2	14	6	5	3	0	1	0	0	0	0	0	0	0	0	0	0	0	2	83	32.3	37.1	10.6	12.1	287	301	18.5	26.2	12	14	22	25	6	9	7.9	8.3	102	103	0.6	0.8	132	207	135	136	3.3	4	1.6
1	1	4	3	10	5	2	3	0	1	0	0	0	0	0	0	0	0	0	0	0	3	65	28.4	30.4	8.5	9.2	423	426	11.9	13.1	18	21	22	22	53	57	11.8	11.8	96	99	2.7	3	202	242	133	134	4.9	5.7	1.5
0	1	1	2	14	6	5	3	0	1	0	0	0	1	0	0	0	0	0	0	0	3	67	41.8	45	14.4	15.4	299	353	11.5	13.3	12	13	28	29	11	12	7.9	8.3	100	101	0.7	0.7	200	221	138	138	3.7	4	0.8
0	1	1	3	14	6	4	4	1	1	0	0	0	1	0	0	0	0	0	0	0	4	68	22.2	24.9	7.5	8.7	85	94	11.9	13.5	19	21	26	27	67	81	7.9	8.2	91	93	6.6	7.4	169	188	134	135	4	4.3	1.8
0	0	1	6	15	6	5	4	0	1	0	0	0	0	0	0	0	0	0	0	0	3	58	19.4	41.9	6.7	14.4	66	189	1.9	8.4	11	22	25	31	12	16	9	11.2	105	110	0.8	0.9	92	328	148	149	3.1	4.2	1.5
1	1	1	2	12	6	2	4	2	1	0	0	0	0	0	0	0	0	0	0	0	3	79	30.8	35.3	10	11.7	153	184	9.3	14	13	13	27	31	34	41	8.2	8.6	96	103	0.7	1.2	110	137	135	138	4.5	4.8	3.2
0	0	1	4	7	4	1	2	0	0	0	0	0	0	0	1	0	0	0	0	0	17	76	34.1	34.1	11.8	11.8	174	174	18.8	18.8	12	12	23	23	11	11	8.4	8.4	103	107	0.5	0.5	145	145	133	134	3.8	4.2	0.8
1	0	4	8	9	1	4	4	0	1	0	2	0	0	0	0	0	0	0	0	1	27	43	20.6	29.1	7.3	10.5	162	224	25.4	34.2	16	25	9	19	17	36	7.1	7.8	104	113	2.1	5.7	187	254	138	144	2.4	3.6	1.5
0	0	1	2	14	6	5	3	0	0	0	0	0	0	0	0	0	0	0	0	0	2	49	33.2	35.1	11.3	12.2	168	168	4.1	5.6	14	16	25	26	6	6	7.8	8.7	101	106	0.4	0.6	92	119	138	142	3.1	4	0.8
1	0	1	8	15	5	0	1	1	2	0	0	0	0	0	0	0	0	0	0	0	9	69	21.8	25	6.9	8.1	298	402	11.4	16.5	16	17	22	24	53	58	7.8	8.3	99	102	2.1	2.3	147	194	139	141	3.7	4.1	0.9
0	1	1	9	14	6	5	3	0	0	0	0	0	0	0	0	0	0	0	0	0	6	59	24.8	30.5	7.9	9.7	158	204	12.5	20.3	18	24	15	20	78	84	7.8	7.8	102	104	5.1	5.7	81	170	136	140	2.9	4.3	0.9
0	0	1	4	14	6	4	4	0	0	0	0	0	0	0	0	0	0	0	0	0	2	73	32.9	35.1	11.6	11.7	183	195	13.1	15.8	11	12	27	27	22	30	7.7	8	103	104	1	1.3	111	122	138	139	3.4	3.8	0.8
0	0	1	2	14	6	4	4	2	0	0	0	0	0	0	0	0	0	0	0	0	2	64	18.5	30.6	5.9	10.8	98	174	6.3	17.8	6	9	24	37	8	11	7.4	8.6	95	110	0.9	1	80	463	135	141	3.4	4.6	0.7
0	0	1	2	14	6	5	3	0	0	0	0	0	0	0	0	0	0	0	0	0	13	59	26.7	34.5	8.1	8.5	261	307	9.5	10	15	22	23	27	70	84	7.7	8.7	90	95	1.8	1.9	103	135	127	131	5.1	7.9	2.8
0	1	1	14	9	5	1	3	1	0	0	0	0	1	0	0	0	0	0	0	0	11	43	29.7	34.6	10.2	12	64	73	13.6	23.1	15	17	19	22	54	58	6.4	6.5	91	99	3.6	4.1	94	134	126	132	3	3.4	0.9
0	1	1	6	15	6	5	4	0	0	0	0	0	0	0	0	0	0	0	0	0	3	64	37.1	40.9	11.6	12.9	428	454	9	10.2	13	13	18	18	18	20	7.6	7.6	109	109	1.1	1.2	110	110	136	136	4.1	4.1	1.8
0	1	1	10	15	6	5	4	0	0	0	0	0	0	0	0	0	0	0	0	0	3	73	20	29.7	6.3	8.6	100	135	14	18.8	7	7	19	20	34	35	7.4	7.1	111	112	1.4	1.8	108	108	137	137	4.6	5.9	1.3
1	1	1	2	8	5	1	2	1	0	0	0	0	0	0	0	0	0	0	0	0	9	79	34.9	36.7	11.8	12.8	241	261	13.1	17.7	14	15	21	22	17	17	7.5	7.6	103	104	1	1	196	197	135	136	3.8	4.1	1
1	0	1	5	12	6	5	1	0	2	0	0	0	1	0	0	0	0	0	0	0	2	48	34.8	39.1	11.3	12.3	206	361	16.7	24.9	17	33	7	15	14	24	6.8	7.5	102	125	1.6	1.9	125	353	138	152	3.2	4.6	1.4
1	0	1	6	14	6	4	4	1	1	0	0	0	1	0	0	0	0	0	0	0	3	90	34.5	38.8	10.7	11.9	222	310	14.5	15.7	18	21	12	13	71	78	7.9	8.3	103	109	3.2	3.5	101	152	134	141	5.4	6.9	1.1
0	0	4	2	15	6	5	4	0	0	0	0	0	0	0	0	0	0	0	0	0	2	68	24.1	37.9	8	12.5	115	188	8	21.8	9	12	24	29	21	31	8.9	8.9	100	110	0.9	1.1	110	134	137	140	3.8	4.4	1
0	1	4	6	7	4	1	2	0	0	0	0	0	0	0	0	0	0	0	0	0	12	66	40.1	42.9	12.8	13.5	72	82	8.8	9.9	6	6	42	42	26	28	8.5	8.8	99	100	1	1	140	148	143	144	3.9	3.9	0.8
0	1	1	5	14	6	4	4	0	0	0	0	0	0	0	0	0	0	0	0	0	26	49	26.4	34.8	8.9	11.4	149	231	7.8	29.7	9	18	22	36	19	24	8.2	8.9	94	102	1.1	1.3	118	362	139	141	3.8	4.8	1.5
0	0	1	3	15	6	5	4	0	0	0	0	0	0	0	0	0	0	0	0	0	2	58	21	30.9	6.6	9.8	146	227	9.1	12.6	8	11	17	26	17	26	5.2	8.4	73	103	0.9	1.3	98	157	95	134	2.7	4	1
0	1	1	2	7	5	1	1	0	1	0	0	0	1	0	0	0	0	0	0	0	5	77	27.6	31.8	8.9	10.2	481	559	16.6	18.7	15	22	21	22	50	54	7.5	7.7	88	96	2	2.5	144	150	126	129	3.9	4.5	1.1
0	1	4	2	14	5	5	4	0	0	0	0	0	0	0	0	0	0	0	0	0	2	56	18.5	33.6	5.7	10.8	131	194	5.7	10.1	10	11	20	22	37	44	8.1	8.4	105	111	1.1	1.2	86	137	134	137	3.8	4	1.3
0	0	1	2	7	5	1	1	0	0	0	0	0	0	0	0	0	0	0	0	0	2	64	39	44.1	12.5	13.8	420	432	11.3	15.3	14	15	25	29	12	14	9.2	10.3	101	107	0.7	0.8	133	135	141	142	4.1	4.2	1.4
0	1	1	4	10	6	1	3	0	0	0	0	0	0	0	0	0	0	0	0	0	2	55	22.2	25.9	7.2	8.3	226	239	7.9	8.4	13	15	23	27	106	110	8.3	8.4	99	102	2.3	2.4	114	242	137	140	4.4	5.5	0.4
0	1	4	6	11	6	1	4	0	0	0	0	0	0	0	0	0	0	0	0	0	13	56	36.8	46.6	11.8	16.2	65	101	8.3	15.8	12	15	23	24	24	29	8	9.6	108	112	0.9	1.2	130	190	146	148	4.3	4.6	2.1
0	1	4	3	15	6	0	3	0	0	0	0	0	0	0	0	0	0	0	0	0	4	46	23.9	34.5	9.2	11.6	103	381	5.5	20.8	9	13	24	27	12	17	7.4	8	107	108	0.9	1.5	125	160	139	141	3.9	4	2.2
0	0	1	5	7	4	1	2	0	0	0	0	0	0	0	0	0	0	0	0	0	13	77	33.2	36.3	11	12.1	996	1013	34.9	37.7	18	21	24	25	19	22	8.6	8.9	100	102	2.6	2.9	135	243	139	142	4	5	2.7
1	1	2	4	10	5	1	4	0	0	0	0	0	0	0	0	0	0	0	0	0	3	89	14.5	24.7	4.3	8.4	386	497	13.2	18	17	17	25	25	45	59	7.9	7.9	105	105	2.5	3.5	83	83	143	143	4.2	4.7	1.6
0	1	1	3	14	6	5	3	0	0	0	0	0	0	0	0	0	0	0	0	0	2	79	40.1	40.8	13	13.4	279	344	14.7	16.5	15	16	24	24	21	21	8.3	8.7	103	104	1	1	152	154	139	139	4.1	4.2	1.2
1	1	1	3	14	6	5	3	0	0	0	0	0	0	0	0	0	0	0	0	0	2	87	35.9	36.1	11.5	11.7	182	199	7.6	9.5	15	17	27	29	30	33	8.5	8.8	99	102	0.9	1.1	163	202	138	142	4.8	5.1	0.9
0	1	1	2	14	6	5	3	0	1	0	1	0	0	0	0	0	0	0	0	0	3	69	23.4	27	7	8.4	128	151	6.6	8.4	17	20	14	15	57	59	7.8	7.9	109	111	5	5.1	65	102	138	139	3.7	4.6	0.5
0	1	1	9	14	6	4	4	1	1	0	0	0	0	0	0	0	0	0	0	0	2	82	28.1	30.4	8.6	9.3	163	202	12.8	16.3	19	20	19	23	33	48	7.3	7.9	104	107	2.8	3.4	99	178	136	144	4.4	4.9	1.3
0	1	1	2	14	6	5	3	0	0	0	0	0	0	0	0	0	0	0	0	0	8	51	29.5	31	9.7	9.9	253	255	13.1	14.2	14	14	25	26	22	24	8.1	8.4	97	100	1.2	1.3	120	170	132	135	4.4	4.5	1.2
0	1	4	3	11	6	4	1	1	0	1	0	0	0	0	0	0	0	0	0	0	2	76	30.8	47	9.7	15	326	501	13.5	15.2	9	26	19	25	14	43	6.5	9.9	127	137	0.8	1.8	177	360	155	174	3.1	4	1.3
0	1	1	4	15	6	0	4	1	0	0	0	0	0	0	0	0	0	0	0	0	2	61	22.9	27.8	7.8	8.9	116	141	7.8	19.1	8	9	26	27	10	12	7.9	7.9	102	105	0.7	1	105	105	137	137	4.5	4.9	1.6
0	0	1	5	14	6	4	4	0	0	1	0	0	0	0	0	0	0	1	0	0	3	56	22.3	23.6	7.5	8.1	432	467	15.8	19.6	18	19	19	20	25	28	8.2	8.6	105	107	1	1.1	159	175	139	139	4.5	4.7	0.8
0	0	4	3	14	6	5	3	1	0	1	0	0	0	1	0	0	0	0	0	0	3	30	20.8	23.6	7.2	8.1	298	354	14.6	19.7	13	13	23	23	16	18	7.9	7.9	103	105	1.4	1.4	193	273	135	137	4	4.2	1.1
0	0	1	2	14	6	5	3	0	0	0	0	0	0	0	0	0	0	0	0	0	8	49	35.8	41.3	12.3	14.3	169	229	14.2	22.2	15	20	16	17	17	26	8.4	8.8	103	107	0.9	1.2	146	182	138	140	3.8	4.6	2
0	0	1	6	14	6	4	4	2	0	0	0	0	0	0	0	0	0	0	0	0	2	85	24.2	29.8	7.5	9	204	264	7.7	14.9	11	12	18	20	26	26	7.7	7.7	108	108	0.8	0.9	135	137	137	140	4.2	4.8	0.8
0	1	1	3	4	1	1	2	0	0	1	0	0	0	0	0	0	0	0	0	0	6	47	39.2	42.9	13.3	14.4	171	210	6.2	7.9	12	15	24	26	6	11	8.4	8.5	102	105	0.6	0.7	80	94	137	139	3.6	3.7	1.6
0	1	4	10	14	6	4	4	1	0	0	0	0	1	0	0	0	0	0	0	1	2	72	33	42.1	11.1	13.9	186	282	25.4	53.7	22	28	15	24	45	56	7.6	8.3	98	102	7.4	9.3	107	442	137	139	5.4	6.1	2.2
0	1	3	3	15	6	5	4	0	0	0	0	0	0	0	0	0	0	0	0	0	3	36	15.7	21.5	5.7	8	60	94	67.1	119.9	14	16	23	27	27	40	6.3	6.7	95	101	2	2.7	114	129	134	137	2.3	3	2.1
0	0	2	4	15	6	5	4	0	1	0	1	0	1	0	0	0	0	0	0	0	6	59	23.2	27.4	7.3	8.8	64	70	0.3	0.6	12	13	25	28	19	22	8.9	9.4	103	103	0.7	0.8	145	178	141	143	4	4.4	2
0	1	4	2	14	6	5	3	1	0	0	0	0	0	0	0	0	0	0	0	0	2	78	25.8	28.6	9.1	9.9	178	261	5.3	10.1	11	11	23	24	15	17	7.9	7.7	105	107	0.7	0.8	121	121	135	135	4.7	4.7	1.5
0	1	4	2	14	6	4	4	1	0	0	0	0	1	0	0	0	0	0	0	0	2	63	27.5	36.3	9.7	12.6	156	214	2.8	11.1	16	22	17	19	19	26	7.3	8.9	96	104	1.4	2.3	135	163	133	135	3.2	3.8	1.7
0	0	1	2	14	6	5	3	0	0	0	0	0	0	0	0	0	0	0	0	0	7	60	30.7	31.4	9.8	10.1	127	125	13.2	13.5	16	16	24	24	41	41	8.5	8.4	98	100	2.1	2.1	190	190	132	133	4.8	5.1	1.3
0	1	1	2	13	6	4	3	0	1	0	1	0	0	0	0	0	0	0	0	0	9	42	35.5	45.5	11.5	14.5	190	269	6.6	11.4	17	27	13	19	10	12	6.6	8.7	98	108	1.2	1.7	130	219	134	140	3.1	4.6	3.6
0	1	1	2	14	6	5	3	0	0	0	0	0	0	0	0	0	0	0	0	0	31	62	37.2	37.4	12.9	13.1	205	248	4.9	9.4	12	14	21	23	10	12	8.1	8.7	105	106	0.6	0.7	143	150	136	138	3.4	4.2	0.6
0	1	1	3	11	5	2	4	0	1	1	0	0	1	0	0	0	0	0	0	0	2	66	26.3	34	8.4	10.4	224	326	11.5	13.7	14	22	20	22	35	59	8	8	117	120	3.6	4.1	135	154	149	155	4.7	4.8	0.8
0	0	2	6	13	6	4	3	1	0	0	0	0	1	0	0	0	0	0	0	0	7	80	41.1	48.8	12.5	14.6	69	119	13.5	14.6	17	31	9	18	26	29	8	9.3	102	108	1.3	1.6	82	522	133	140	3.4	8.6	5.4
1	1	1	2	3	1	1	1	0	0	0	0	0	0	0	0	0	0	0	0	0	8	57	37.3	42.7	13	14.8	348	409	15.6	21.9	9	15	20	25	14	19	7.8	8.8	103	112	0.3	0.7	94	287	138	141	2.8	4.2	1.1
0	1	4	2	9	5	1	3	0	0	0	0	0	0	0	0	0	0	0	0	0	2	62	35.6	41.5	12	14	152	188	8.2	18.6	13	17	26	26	21	22	8.7	8.7	100	102	0.7	0.9	111	123	137	139	3.6	3.7	0.6
0	1	1	4	14	6	5	3	0	0	0	0	0	0	0	0	0	0	0	0	0	2	72	30.9	35.6	10.6	11.5	189	240	12.9	18.9	12	12	24	25	29	34	8.6	8.6	110	111	1.4	1.8	78	135	141	144	4.4	5.2	1.1
0	0	1	6	14	6	5	3	1	0	0	0	0	0	0	0	0	0	0	0	0	4	73	33.4	41.4	11.3	13.8	204	279	13.7	18.9	11	23	18	26	12	15	7.3	8.4	102	110	0.7	0.9	126	177	135	140	3.8	4.8	1.2
0	0	4	4	3	1	1	1	1	1	0	0	0	0	0	0	0	0	0	0	0	3	61	28	35.2	9.6	12	202	221	24.5	28.3	14	20	19	24	11	17	7.6	7.9	103	107	0.6	0.9	140	200	138	141	3.5	3.9	1.3
1	1	1	2	4	1	1	2	0	0	0	0	0	0	0	0	0	0	0	0	0	2	73	30.3	30.3	10.6	10.6	168	168	15.1	15.1	16	18	22	23	62	63	8.7	8.7	102	103	1.8	1.8	99	156	137	138	4.1	4.7	2.3
0	1	1	2	14	6	5	3	0	0	0	0	0	0	0	0	0	0	0	0	0	3	79	32.4	34	11.1	11.7	392	488	13.9	24.6	16	18	18	20	35	39	7.1	7.3	98	102	1.4	1.7	103	138	129	132	4.7	5.8	1.5
0	0	3	3	9	6	1	2	0	0	0	0	0	0	0	0	0	0	0	0	0	16	67	25	28.9	7.9	9.1	173	279	8.5	15	19	21	19	24	28	33	8.1	8.5	103	108	1.7	2.2	171	192	140	143	3.6	5.6	1.3
0	1	1	9	15	6	5	4	1	1	0	0	0	0	0	0	0	0	0	0	0	4	64	26.7	33.4	9.7	11.5	50	103	7.3	14.6	12	18	20	23	15	28	7.3	8.7	105	105	0.8	0.9	245	353	135	139	3.4	4.3	2.1
0	1	1	3	14	6	5	3	1	0	0	0	0	0	0	0	0	0	0	0	0	2	62	22.7	30.3	7.4	10.1	103	116	8.4	13.6	9	12	22	24	18	19	9.4	9.4	108	110	0.9	1.1	134	134	137	139	4.1	4.7	1.1
1	1	4	4	7	5	1	1	0	0	0	0	0	0	0	0	0	0	0	0	0	2	90	30.9	34.6	10.1	11.7	133	163	3.8	5.3	11	14	23	26	26	28	7.7	8.2	108	111	1	1.2	64	78	137	146	3.4	7.1	2.1
0	1	1	4	15	6	5	4	0	0	0	0	0	0	0	0	0	0	0	0	0	2	56	25	33.9	9.1	12.2	141	178	8.8	10.9	9	9	27	28	9	11	8	8	102	105	0.5	0.6	105	105	135	137	3.8	3.8	2.6
0	0	1	2	6	4	1	1	0	0	0	0	0	0	0	0	0	0	0	0	0	7	95	31.1	32.4	10.2	10.7	237	270	12.8	13	15	17	21	22	29	32	8.9	9.1	108	112	1.3	1.4	126	163	141	145	4.4	5.3	1.7
0	1	4	3	14	6	4	4	1	0	0	0	0	0	0	0	0	0	0	0	0	5	30	39.8	45.4	12.8	14.5	257	343	2.5	13.5	12	16	20	21	13	16	7.7	7.7	103	108	1.1	1.5	117	150	135	136	3.6	5.2	2.7
0	1	1	2	3	1	1	1	0	0	0	0	0	0	0	0	0	0	0	0	0	13	55	23.1	23.1	8	8	174	174	1.6	1.6	11	11	21	21	13	13	6.5	6.5	109	109	1	1	121	121	137	137	3.5	3.5	1.5
0	0	1	7	3	1	1	1	0	1	0	0	0	0	0	0	0	0	0	0	0	7	62	20.1	41.6	9.4	14.5	69	221	0.6	4	6	18	14	22	13	19	6.3	7.6	111	119	0.5	1	132	194	136	143	3.6	5.1	3.4
0	0	1	3	10	6	1	3	0	1	0	0	0	0	0	1	0	0	0	0	0	8	82	29.5	40	10.2	13.9	214	267	16	22.2	14	15	20	23	22	26	8.6	8.6	102	108	1.2	1.3	180	243	136	139	3.3	4	0.9
0	0	2	5	15	6	5	4	0	0	1	0	0	0	0	0	0	0	0	0	0	2	57	25.7	32.8	8.8	11.1	227	243	16.8	23.8	19	23	12	17	99	119	7.1	7.7	107	115	2.7	3.1	78	242	139	147	3.5	4.4	2.6
0	1	1	3	14	6	5	3	2	0	0	0	0	0	0	0	0	0	0	0	0	2	73	32.5	41.3	11.4	14.3	74	90	9.4	10.2	11	11	27	27	18	19	7.4	7.8	108	110	0.9	1.1	134	145	142	144	3.9	4.1	1.3
1	1	4	9	3	1	1	1	1	1	1	0	0	0	1	0	0	0	0	0	1	11	67	35	47	11.1	14.2	158	291	10.4	22.2	17	24	17	25	41	49	6.6	7.7	97	101	6.1	6.7	60	226	133	135	5.5	6.3	1
0	1	4	2	13	6	4	3	0	1	0	0	0	0	0	0	0	0	0	0	0	3	54	38.6	38.6	12.8	12.8	183	183	13.1	13.1	17	17	21	21	25	25	9.2	9.2	107	107	0.7	0.7	136	136	140	140	4.9	4.9	1.3
0	0	1	6	8	5	2	1	0	0	0	0	0	0	0	0	0	0	0	0	0	4	78	24.2	33.9	8.1	11.5	81	130	12.2	19.7	12	13	21	24	18	22	8	8.2	103	105	0.9	1	130	130	135	135	3.5	4.4	1.3
0	1	1	9	15	1	0	1	0	0	0	0	0	0	0	0	0	0	0	0	0	7	61	24.6	38.5	8	12.1	113	236	7.9	26.7	10	13	25	28	27	30	8.6	9.4	101	106	1.5	1.6	88	111	132	139	4.6	5	1.1
1	0	4	2	5	3	1	1	0	1	0	0	0	0	0	0	0	0	0	0	0	29	74	25.9	29.6	8.5	9.8	157	181	3.8	6.1	13	18	19	20	13	16	8.7	9.3	106	106	0.8	0.9	71	98	136	139	3.4	3.8	1.8
1	0	1	3	3	1	1	1	0	0	0	0	0	0	0	0	0	0	0	0	0	6	58	45.2	51.3	15	17.5	336	358	28.8	30.4	15	18	22	23	14	17	8.9	9.5	107	112	0.7	0.8	163	300	142	144	3.3	4.5	3
0	0	1	5	12	6	2	4	3	2	0	0	0	1	0	0	0	0	0	0	0	9	84	31.5	37.9	9.6	11.6	148	172	7.4	8.6	17	20	15	18	78	88	8.2	8.4	106	112	4.8	5.9	89	89	140	142	3.5	4.6	0.7
0	1	4	3	6	1	1	4	0	0	0	0	0	0	0	0	0	0	0	0	0	23	28	37.8	41.2	13.5	14.5	166	187	9	12.8	13	13	22	22	7	8	9.2	9.7	102	105	0.7	0.8	148	151	137	139	3.6	3.9	1.1
1	1	1	5	7	5	1	1	0	0	0	0	0	0	0	0	0	0	0	0	0	2	75	31.7	32.7	11.1	11.4	364	381	13.2	17.8	11	12	22	22	16	22	7.4	8.4	102	102	0.5	0.6	91	146	131	132	4.1	4.3	1.4
0	0	1	2	13	6	4	3	0	0	0	0	0	0	0	0	0	0	0	1	0	4	86	25.3	28.8	8.2	8.9	197	235	15.1	16.5	14	17	19	20	49	54	7.9	8	93	95	1.7	2	139	214	120	126	4.9	6	1.4
0	1	4	3	14	6	5	3	0	0	0	0	0	0	0	0	0	0	0	0	0	6	61	28.9	38.8	13.2	13.2	271	271	10.9	10.9	12	12	21	21	31	35	7.4	7.4	111	111	1.3	1.7	252	252	139	139	4.7	4.7	1.9
0	1	1	3	14	6	5	3	2	0	0	0	0	0	0	0	0	0	0	0	0	2	62	29.3	36.8	10.6	12.6	139	176	7.7	11.8	12	13	22	24	12	12	7.6	8.1	104	109	0.6	0.6	120	120	136	139	3.6	4.6	1.3
0	1	1	5	14	6	4	4	0	0	0	0	0	0	0	0	0	0	0	0	0	8	68	23.8	34.2	7.8	10.8	194	275	10	12.5	12	16	24	25	21	26	9.1	9.1	103	107	1.4	1.7	107	123	137	139	4.1	4.7	1.8
[truncated: 10,862 more rows]
[truncated: 23 more columns]
